# Supplementary material for: Ex vivo culture of circulating tumour cells derived from non-small cell lung cancer
Source: PubMed Central journal article supplement — Transl Lung Cancer Res. 2020 Oct;9(5):1795–809. doi: 10.21037/tlcr-20-521 (PMC7653113; doi:10.21037/tlcr-20-521), 2020-10
Supplement: tlcr-09-05-1795-dss.pdf [file tlcr-09-05-1795-dss.pdf]

## Data Sharing Statement

|                     |                                                                                                                                                    |                                                                                                          |
|---------------------|----------------------------------------------------------------------------------------------------------------------------------------------------|----------------------------------------------------------------------------------------------------------|
| <b>Article Info</b> | <a href="http://dx.doi.org/10.21037/tlcr-20-521">http://dx.doi.org/10.21037/tlcr-20-521</a>                                                        |                                                                                                          |
| <b>Item</b>         | <b>Question</b>                                                                                                                                    | <b>Authors' Response<br/>(place "-" if not applicable)</b>                                               |
| 1                   | Would you like to share data collected for your study to others?                                                                                   | The data that support the findings of this study are available on request from the corresponding author. |
| 2                   | If not, would you like to share the reason for your decision?                                                                                      | The data are not publicly available due to privacy or ethical restrictions.                              |
| 3                   | What data in particular will be shared?                                                                                                            | -                                                                                                        |
| 4                   | Any other documents will be share? Such as study protocol, statistical analysis plan, informed consent form, clinical study report, analytic code. | -                                                                                                        |
| 5                   | When will data availability begin?                                                                                                                 | Upon request                                                                                             |
| 6                   | When will data availability end?                                                                                                                   | -                                                                                                        |
| 7                   | To whom will you share the data?                                                                                                                   | -                                                                                                        |
| 8                   | For what type of analysis or purpose?                                                                                                              | -                                                                                                        |
| 9                   | How or where can the data/documents be obtained?                                                                                                   | Request from the corresponding author.                                                                   |
| 10                  | Any other restrictions?                                                                                                                            | -                                                                                                        |
