# Supplementary material for: Ex vivo culture of circulating tumour cells derived from non-small cell lung cancer
Source: PubMed Central journal article supplement — Transl Lung Cancer Res. 2020 Oct;9(5):1795–809. doi: 10.21037/tlcr-20-521 (PMC7653113; doi:10.21037/tlcr-20-521), 2020-10
Supplement: tlcr-09-05-1795-supplementary.pdf [file tlcr-09-05-1795-supplementary.pdf]

VEP annotated somatic variants

| Hugo_Symbol | Entrez_Gene_Id | Center | NCBI_Build |
|-------------|----------------|--------|------------|
| AADAACL2    | 0              | .      | GRCh37     |
| AAED1       | 0              | .      | GRCh37     |
| AASS        | 0              | .      | GRCh37     |
| ABCA10      | 0              | .      | GRCh37     |
| ABCA3       | 0              | .      | GRCh37     |
| ABCA6       | 0              | .      | GRCh37     |
| ABCA6       | 0              | .      | GRCh37     |
| ABCA9       | 0              | .      | GRCh37     |
| ABCC1       | 0              | .      | GRCh37     |
| ABCC6       | 0              | .      | GRCh37     |
| ABCC8       | 0              | .      | GRCh37     |
| ABHD3       | 0              | .      | GRCh37     |
| ABR         | 0              | .      | GRCh37     |
| AC005013.5  | 0              | .      | GRCh37     |
| AC026202.1  | 0              | .      | GRCh37     |
| ACAD8       | 0              | .      | GRCh37     |
| ACADM       | 0              | .      | GRCh37     |
| ACADSB      | 0              | .      | GRCh37     |
| ACBD3       | 0              | .      | GRCh37     |
| ACER1       | 0              | .      | GRCh37     |
| ACP2        | 0              | .      | GRCh37     |
| ACPL2       | 0              | .      | GRCh37     |
| ACSBG1      | 0              | .      | GRCh37     |
| ACSF3       | 0              | .      | GRCh37     |
| ACSM4       | 0              | .      | GRCh37     |
| ACVR2B      | 0              | .      | GRCh37     |
| ADAM15      | 0              | .      | GRCh37     |
| ADAM17      | 0              | .      | GRCh37     |
| ADAMTS14    | 0              | .      | GRCh37     |
| ADAMTS2     | 0              | .      | GRCh37     |
| ADAMTS20    | 0              | .      | GRCh37     |
| ADAMTS4     | 0              | .      | GRCh37     |
| ADAMTS6     | 0              | .      | GRCh37     |
| ADAMTSL1    | 0              | .      | GRCh37     |
| ADORA1      | 0              | .      | GRCh37     |
| ADORA3      | 0              | .      | GRCh37     |
| AFAP1L2     | 0              | .      | GRCh37     |
| AFF1        | 0              | .      | GRCh37     |
| AFF2        | 0              | .      | GRCh37     |
| AGAP3       | 0              | .      | GRCh37     |
| AGBL3       | 0              | .      | GRCh37     |
| AGTR1       | 0              | .      | GRCh37     |
| AHI1        | 0              | .      | GRCh37     |
| AHSP        | 0              | .      | GRCh37     |
| AIG1        | 0              | .      | GRCh37     |
| AIM1L       | 0              | .      | GRCh37     |
| AIM1L       | 0              | .      | GRCh37     |
| AIPL1       | 0              | .      | GRCh37     |
| AIRE        | 0              | .      | GRCh37     |
| AIRE        | 0              | .      | GRCh37     |
| AKAP9       | 0              | .      | GRCh37     |
| AKAP9       | 0              | .      | GRCh37     |
| AKR1B10     | 0              | .      | GRCh37     |
| ALB         | 0              | .      | GRCh37     |

VEP annotated somatic variants

|                |   |   |        |
|----------------|---|---|--------|
| ALDH16A1       | 0 | . | GRCh37 |
| ALDH1A3        | 0 | . | GRCh37 |
| ALOX5          | 0 | . | GRCh37 |
| ALPK3          | 0 | . | GRCh37 |
| ALPK3          | 0 | . | GRCh37 |
| AMICA1         | 0 | . | GRCh37 |
| AMICA1         | 0 | . | GRCh37 |
| ANAPC1         | 0 | . | GRCh37 |
| ANK1           | 0 | . | GRCh37 |
| ANKAR          | 0 | . | GRCh37 |
| ANKK1          | 0 | . | GRCh37 |
| ANKLE2         | 0 | . | GRCh37 |
| ANKRD18B       | 0 | . | GRCh37 |
| ANKRD26        | 0 | . | GRCh37 |
| ANKRD28        | 0 | . | GRCh37 |
| ANKRD35        | 0 | . | GRCh37 |
| ANKRD52        | 0 | . | GRCh37 |
| ANKRD55        | 0 | . | GRCh37 |
| AOX1           | 0 | . | GRCh37 |
| AP002884.2     | 0 | . | GRCh37 |
| AP1B1          | 0 | . | GRCh37 |
| AP2A1          | 0 | . | GRCh37 |
| AP4E1          | 0 | . | GRCh37 |
| AP4E1          | 0 | . | GRCh37 |
| APBB1IP        | 0 | . | GRCh37 |
| APOOL          | 0 | . | GRCh37 |
| AQP12A         | 0 | . | GRCh37 |
| AQP12A         | 0 | . | GRCh37 |
| AQP4           | 0 | . | GRCh37 |
| AQPEP          | 0 | . | GRCh37 |
| ARF3           | 0 | . | GRCh37 |
| ARHGAP10       | 0 | . | GRCh37 |
| ARHGAP19-SLIT1 | 0 | . | GRCh37 |
| ARHGAP36       | 0 | . | GRCh37 |
| ARHGAP4        | 0 | . | GRCh37 |
| ARHGEF11       | 0 | . | GRCh37 |
| ARHGEF16       | 0 | . | GRCh37 |
| ARHGEF2        | 0 | . | GRCh37 |
| ARHGEF3        | 0 | . | GRCh37 |
| ARHGEF7        | 0 | . | GRCh37 |
| ARID3C         | 0 | . | GRCh37 |
| ARL5B          | 0 | . | GRCh37 |
| ARMC8          | 0 | . | GRCh37 |
| ARMCX4         | 0 | . | GRCh37 |
| ARMCX4         | 0 | . | GRCh37 |
| ARMCX4         | 0 | . | GRCh37 |
| ARMCX4         | 0 | . | GRCh37 |
| ARRB2          | 0 | . | GRCh37 |
| ARRDC2         | 0 | . | GRCh37 |
| ARRDC2         | 0 | . | GRCh37 |
| ARSA           | 0 | . | GRCh37 |
| ARVCF          | 0 | . | GRCh37 |
| ASB10          | 0 | . | GRCh37 |
| ASB14          | 0 | . | GRCh37 |
| ASB4           | 0 | . | GRCh37 |

VEP annotated somatic variants

|         |   |   |        |
|---------|---|---|--------|
| ASB6    | 0 | . | GRCh37 |
| ASIC4   | 0 | . | GRCh37 |
| ASPSCR1 | 0 | . | GRCh37 |
| ASTL    | 0 | . | GRCh37 |
| ASTL    | 0 | . | GRCh37 |
| ASTN2   | 0 | . | GRCh37 |
| ASXL3   | 0 | . | GRCh37 |
| ASZ1    | 0 | . | GRCh37 |
| ATG4C   | 0 | . | GRCh37 |
| ATL1    | 0 | . | GRCh37 |
| ATP11A  | 0 | . | GRCh37 |
| ATP13A2 | 0 | . | GRCh37 |
| ATP1A2  | 0 | . | GRCh37 |
| ATP1A4  | 0 | . | GRCh37 |
| ATP2C2  | 0 | . | GRCh37 |
| ATP5C1  | 0 | . | GRCh37 |
| ATP7A   | 0 | . | GRCh37 |
| ATP8B1  | 0 | . | GRCh37 |
| ATP9A   | 0 | . | GRCh37 |
| ATP9A   | 0 | . | GRCh37 |
| ATRIP   | 0 | . | GRCh37 |
| ATXN2L  | 0 | . | GRCh37 |
| AWAT1   | 0 | . | GRCh37 |
| AWAT2   | 0 | . | GRCh37 |
| AXDND1  | 0 | . | GRCh37 |
| AXIN1   | 0 | . | GRCh37 |
| B3GNT3  | 0 | . | GRCh37 |
| BAIAP2  | 0 | . | GRCh37 |
| BAIAP3  | 0 | . | GRCh37 |
| BBS12   | 0 | . | GRCh37 |
| BCKDHA  | 0 | . | GRCh37 |
| BCL7B   | 0 | . | GRCh37 |
| BCORL1  | 0 | . | GRCh37 |
| BEST1   | 0 | . | GRCh37 |
| BICD1   | 0 | . | GRCh37 |
| BLNK    | 0 | . | GRCh37 |
| BMP15   | 0 | . | GRCh37 |
| BNC1    | 0 | . | GRCh37 |
| BPIFB2  | 0 | . | GRCh37 |
| BPTF    | 0 | . | GRCh37 |
| BRCA1   | 0 | . | GRCh37 |
| BRCA1   | 0 | . | GRCh37 |
| BRCA1   | 0 | . | GRCh37 |
| BRCA2   | 0 | . | GRCh37 |
| BRD9    | 0 | . | GRCh37 |
| BRWD1   | 0 | . | GRCh37 |
| BSDC1   | 0 | . | GRCh37 |
| BSG     | 0 | . | GRCh37 |
| BSG     | 0 | . | GRCh37 |
| BTBD16  | 0 | . | GRCh37 |
| BTBD16  | 0 | . | GRCh37 |
| BTBD8   | 0 | . | GRCh37 |
| BTG1    | 0 | . | GRCh37 |
| BTNL9   | 0 | . | GRCh37 |
| BZRAP1  | 0 | . | GRCh37 |

VEP annotated somatic variants

|           |   |   |        |
|-----------|---|---|--------|
| C10orf105 | 0 | . | GRCh37 |
| C10orf71  | 0 | . | GRCh37 |
| C10orf90  | 0 | . | GRCh37 |
| C11orf49  | 0 | . | GRCh37 |
| C12orf49  | 0 | . | GRCh37 |
| C12orf55  | 0 | . | GRCh37 |
| C12orf60  | 0 | . | GRCh37 |
| C14orf164 | 0 | . | GRCh37 |
| C17orf107 | 0 | . | GRCh37 |
| C17orf53  | 0 | . | GRCh37 |
| C19orf26  | 0 | . | GRCh37 |
| C19orf33  | 0 | . | GRCh37 |
| C1GALT1C1 | 0 | . | GRCh37 |
| C1orf101  | 0 | . | GRCh37 |
| C1orf141  | 0 | . | GRCh37 |
| C1orf168  | 0 | . | GRCh37 |
| C1orf173  | 0 | . | GRCh37 |
| C1QTNF1   | 0 | . | GRCh37 |
| C2orf54   | 0 | . | GRCh37 |
| C2orf81   | 0 | . | GRCh37 |
| C3        | 0 | . | GRCh37 |
| C4orf29   | 0 | . | GRCh37 |
| C5        | 0 | . | GRCh37 |
| C5        | 0 | . | GRCh37 |
| C6orf201  | 0 | . | GRCh37 |
| C7        | 0 | . | GRCh37 |
| CA10      | 0 | . | GRCh37 |
| CA5A      | 0 | . | GRCh37 |
| CABIN1    | 0 | . | GRCh37 |
| CACNA1A   | 0 | . | GRCh37 |
| CACNA1B   | 0 | . | GRCh37 |
| CACNA1C   | 0 | . | GRCh37 |
| CACNA2D2  | 0 | . | GRCh37 |
| CACNA2D2  | 0 | . | GRCh37 |
| CACNB2    | 0 | . | GRCh37 |
| CAGE1     | 0 | . | GRCh37 |
| CALD1     | 0 | . | GRCh37 |
| CALR      | 0 | . | GRCh37 |
| CAMK1D    | 0 | . | GRCh37 |
| CAMK2D    | 0 | . | GRCh37 |
| CAMKMT    | 0 | . | GRCh37 |
| CAMSAP3   | 0 | . | GRCh37 |
| CAPN11    | 0 | . | GRCh37 |
| CAPN9     | 0 | . | GRCh37 |
| CAPS      | 0 | . | GRCh37 |
| CARD10    | 0 | . | GRCh37 |
| CARD8     | 0 | . | GRCh37 |
| CASP14    | 0 | . | GRCh37 |
| CASQ1     | 0 | . | GRCh37 |
| CASZ1     | 0 | . | GRCh37 |
| CATSPERG  | 0 | . | GRCh37 |
| CAV3      | 0 | . | GRCh37 |
| CCDC102A  | 0 | . | GRCh37 |
| CCDC104   | 0 | . | GRCh37 |
| CCDC105   | 0 | . | GRCh37 |

VEP annotated somatic variants

|                |   |   |        |
|----------------|---|---|--------|
| CCDC11         | 0 | . | GRCh37 |
| CCDC120        | 0 | . | GRCh37 |
| CCDC132        | 0 | . | GRCh37 |
| CCDC137        | 0 | . | GRCh37 |
| CCDC147        | 0 | . | GRCh37 |
| CCDC158        | 0 | . | GRCh37 |
| CCDC169-SOHLH2 | 0 | . | GRCh37 |
| CCDC18         | 0 | . | GRCh37 |
| CCDC57         | 0 | . | GRCh37 |
| CCDC6          | 0 | . | GRCh37 |
| CCDC81         | 0 | . | GRCh37 |
| CCL19          | 0 | . | GRCh37 |
| CCR2           | 0 | . | GRCh37 |
| CD109          | 0 | . | GRCh37 |
| CD200R1L       | 0 | . | GRCh37 |
| CD244          | 0 | . | GRCh37 |
| CD300A         | 0 | . | GRCh37 |
| CD3EAP         | 0 | . | GRCh37 |
| CD46           | 0 | . | GRCh37 |
| CD7            | 0 | . | GRCh37 |
| CDC23          | 0 | . | GRCh37 |
| CDC42BPG       | 0 | . | GRCh37 |
| CDC45          | 0 | . | GRCh37 |
| CDCP1          | 0 | . | GRCh37 |
| CDH18          | 0 | . | GRCh37 |
| CDK19          | 0 | . | GRCh37 |
| CDK3           | 0 | . | GRCh37 |
| CDK7           | 0 | . | GRCh37 |
| CDKAL1         | 0 | . | GRCh37 |
| CDKL5          | 0 | . | GRCh37 |
| CDS2           | 0 | . | GRCh37 |
| CDSN           | 0 | . | GRCh37 |
| CDSN           | 0 | . | GRCh37 |
| CEACAM21       | 0 | . | GRCh37 |
| CEACAM3        | 0 | . | GRCh37 |
| CECR1          | 0 | . | GRCh37 |
| CECR2          | 0 | . | GRCh37 |
| CECR2          | 0 | . | GRCh37 |
| CECR5          | 0 | . | GRCh37 |
| CECR6          | 0 | . | GRCh37 |
| CENPI          | 0 | . | GRCh37 |
| CENPW          | 0 | . | GRCh37 |
| CEP250         | 0 | . | GRCh37 |
| CEP250         | 0 | . | GRCh37 |
| CEP63          | 0 | . | GRCh37 |
| CEP63          | 0 | . | GRCh37 |
| CEP70          | 0 | . | GRCh37 |
| CEP95          | 0 | . | GRCh37 |
| CERCAM         | 0 | . | GRCh37 |
| CES2           | 0 | . | GRCh37 |
| CFH            | 0 | . | GRCh37 |
| CFTR           | 0 | . | GRCh37 |
| CGB7           | 0 | . | GRCh37 |
| CHD1L          | 0 | . | GRCh37 |
| CHFR           | 0 | . | GRCh37 |

VEP annotated somatic variants

|         |   |   |        |
|---------|---|---|--------|
| CHFR    | 0 | . | GRCh37 |
| CHI3L2  | 0 | . | GRCh37 |
| CHRNA1  | 0 | . | GRCh37 |
| CHST14  | 0 | . | GRCh37 |
| CIITA   | 0 | . | GRCh37 |
| CINP    | 0 | . | GRCh37 |
| CIT     | 0 | . | GRCh37 |
| CITED1  | 0 | . | GRCh37 |
| CKMT2   | 0 | . | GRCh37 |
| CLCN6   | 0 | . | GRCh37 |
| CLCNKA  | 0 | . | GRCh37 |
| CLDN15  | 0 | . | GRCh37 |
| CLEC4E  | 0 | . | GRCh37 |
| CLIC2   | 0 | . | GRCh37 |
| CLIC4   | 0 | . | GRCh37 |
| CLIP1   | 0 | . | GRCh37 |
| CLIP4   | 0 | . | GRCh37 |
| CNKSR2  | 0 | . | GRCh37 |
| CNNM1   | 0 | . | GRCh37 |
| CNOT1   | 0 | . | GRCh37 |
| CNOT11  | 0 | . | GRCh37 |
| CNR1    | 0 | . | GRCh37 |
| CNTN4   | 0 | . | GRCh37 |
| CNTNAP2 | 0 | . | GRCh37 |
| CNTNAP2 | 0 | . | GRCh37 |
| CNTRL   | 0 | . | GRCh37 |
| COBL    | 0 | . | GRCh37 |
| COG4    | 0 | . | GRCh37 |
| COG5    | 0 | . | GRCh37 |
| COL17A1 | 0 | . | GRCh37 |
| COL23A1 | 0 | . | GRCh37 |
| COL24A1 | 0 | . | GRCh37 |
| COL24A1 | 0 | . | GRCh37 |
| COL26A1 | 0 | . | GRCh37 |
| COL4A6  | 0 | . | GRCh37 |
| COL5A3  | 0 | . | GRCh37 |
| COL6A1  | 0 | . | GRCh37 |
| COL6A3  | 0 | . | GRCh37 |
| COMT    | 0 | . | GRCh37 |
| COX20   | 0 | . | GRCh37 |
| CP      | 0 | . | GRCh37 |
| CPEB1   | 0 | . | GRCh37 |
| CPEB4   | 0 | . | GRCh37 |
| CR2     | 0 | . | GRCh37 |
| CRB2    | 0 | . | GRCh37 |
| CRHR2   | 0 | . | GRCh37 |
| CRIM1   | 0 | . | GRCh37 |
| CRIM1   | 0 | . | GRCh37 |
| CRISP3  | 0 | . | GRCh37 |
| CRNKL1  | 0 | . | GRCh37 |
| CRTC3   | 0 | . | GRCh37 |
| CRYBG3  | 0 | . | GRCh37 |
| CRYBG3  | 0 | . | GRCh37 |
| CSAG1   | 0 | . | GRCh37 |
| CSNK2A1 | 0 | . | GRCh37 |

VEP annotated somatic variants

|              |   |   |        |
|--------------|---|---|--------|
| CSPG4        | 0 | . | GRCh37 |
| CTCFL        | 0 | . | GRCh37 |
| CTD-3088G3.8 | 0 | . | GRCh37 |
| CTNNA3       | 0 | . | GRCh37 |
| CTNNAL1      | 0 | . | GRCh37 |
| CUBN         | 0 | . | GRCh37 |
| CUL2         | 0 | . | GRCh37 |
| CUL7         | 0 | . | GRCh37 |
| CUX1         | 0 | . | GRCh37 |
| CUX1         | 0 | . | GRCh37 |
| CWC22        | 0 | . | GRCh37 |
| CWC22        | 0 | . | GRCh37 |
| CWF19L2      | 0 | . | GRCh37 |
| CXCR3        | 0 | . | GRCh37 |
| CYB561A3     | 0 | . | GRCh37 |
| CYB5R2       | 0 | . | GRCh37 |
| CYP2A13      | 0 | . | GRCh37 |
| CYP2A13      | 0 | . | GRCh37 |
| CYP3A4       | 0 | . | GRCh37 |
| CYP4F12      | 0 | . | GRCh37 |
| CYP51A1      | 0 | . | GRCh37 |
| DAGLA        | 0 | . | GRCh37 |
| DARS         | 0 | . | GRCh37 |
| DBR1         | 0 | . | GRCh37 |
| DCAF15       | 0 | . | GRCh37 |
| DCAF15       | 0 | . | GRCh37 |
| DCAF15       | 0 | . | GRCh37 |
| DCC          | 0 | . | GRCh37 |
| DCDC2        | 0 | . | GRCh37 |
| DCHS2        | 0 | . | GRCh37 |
| DCTD         | 0 | . | GRCh37 |
| DDX11        | 0 | . | GRCh37 |
| DDX11        | 0 | . | GRCh37 |
| DDX59        | 0 | . | GRCh37 |
| DENND1A      | 0 | . | GRCh37 |
| DENND5A      | 0 | . | GRCh37 |
| DEPDC1B      | 0 | . | GRCh37 |
| DGCR2        | 0 | . | GRCh37 |
| DGKB         | 0 | . | GRCh37 |
| DHRS3        | 0 | . | GRCh37 |
| DHX32        | 0 | . | GRCh37 |
| DHX37        | 0 | . | GRCh37 |
| DHX8         | 0 | . | GRCh37 |
| DHX8         | 0 | . | GRCh37 |
| DHX8         | 0 | . | GRCh37 |
| DIAPH1       | 0 | . | GRCh37 |
| DIP2B        | 0 | . | GRCh37 |
| DIS3L        | 0 | . | GRCh37 |
| DISC1        | 0 | . | GRCh37 |
| DISC1        | 0 | . | GRCh37 |
| DKK4         | 0 | . | GRCh37 |
| DLG2         | 0 | . | GRCh37 |
| DLG3         | 0 | . | GRCh37 |
| DLG5         | 0 | . | GRCh37 |
| DLK2         | 0 | . | GRCh37 |

VEP annotated somatic variants

|          |   |   |        |
|----------|---|---|--------|
| DMKN     | 0 | . | GRCh37 |
| DNA2     | 0 | . | GRCh37 |
| DNAH11   | 0 | . | GRCh37 |
| DNAH12   | 0 | . | GRCh37 |
| DNAH14   | 0 | . | GRCh37 |
| DNAH14   | 0 | . | GRCh37 |
| DNAH14   | 0 | . | GRCh37 |
| DNAH14   | 0 | . | GRCh37 |
| DNAH14   | 0 | . | GRCh37 |
| DNAH17   | 0 | . | GRCh37 |
| DNAH8    | 0 | . | GRCh37 |
| DNAH9    | 0 | . | GRCh37 |
| DNALI1   | 0 | . | GRCh37 |
| DNASE2B  | 0 | . | GRCh37 |
| DNMBP    | 0 | . | GRCh37 |
| DOCK2    | 0 | . | GRCh37 |
| DOCK3    | 0 | . | GRCh37 |
| DOT1L    | 0 | . | GRCh37 |
| DPEP1    | 0 | . | GRCh37 |
| DPF1     | 0 | . | GRCh37 |
| DPH5     | 0 | . | GRCh37 |
| DPY19L2  | 0 | . | GRCh37 |
| DRAXIN   | 0 | . | GRCh37 |
| DRP2     | 0 | . | GRCh37 |
| DRP2     | 0 | . | GRCh37 |
| DRP2     | 0 | . | GRCh37 |
| DSCAML1  | 0 | . | GRCh37 |
| DSG3     | 0 | . | GRCh37 |
| DSG4     | 0 | . | GRCh37 |
| DSG4     | 0 | . | GRCh37 |
| DSP      | 0 | . | GRCh37 |
| DST      | 0 | . | GRCh37 |
| DTD2     | 0 | . | GRCh37 |
| DTNBP1   | 0 | . | GRCh37 |
| DTWD2    | 0 | . | GRCh37 |
| DTX2     | 0 | . | GRCh37 |
| DUSP18   | 0 | . | GRCh37 |
| DUSP6    | 0 | . | GRCh37 |
| DYNC111  | 0 | . | GRCh37 |
| DYNC2H1  | 0 | . | GRCh37 |
| EBNA1BP2 | 0 | . | GRCh37 |
| EBP      | 0 | . | GRCh37 |
| ECE1     | 0 | . | GRCh37 |
| ECEL1    | 0 | . | GRCh37 |
| ECT2     | 0 | . | GRCh37 |
| ECT2L    | 0 | . | GRCh37 |
| EDEM3    | 0 | . | GRCh37 |
| EDN1     | 0 | . | GRCh37 |
| EDNRB    | 0 | . | GRCh37 |
| EEA1     | 0 | . | GRCh37 |
| EEF1A2   | 0 | . | GRCh37 |
| EEF1E1   | 0 | . | GRCh37 |
| EFCAB13  | 0 | . | GRCh37 |
| EFCAB3   | 0 | . | GRCh37 |
| EFCAB4B  | 0 | . | GRCh37 |



VEP annotated somatic variants

|         |   |   |        |
|---------|---|---|--------|
| EFHB    | 0 | . | GRCh37 |
| EFTUD1  | 0 | . | GRCh37 |
| EFTUD2  | 0 | . | GRCh37 |
| EIF2S3  | 0 | . | GRCh37 |
| ELF4    | 0 | . | GRCh37 |
| ELFN2   | 0 | . | GRCh37 |
| ELFN2   | 0 | . | GRCh37 |
| ELFN2   | 0 | . | GRCh37 |
| ELN     | 0 | . | GRCh37 |
| ELOVL2  | 0 | . | GRCh37 |
| EMC1    | 0 | . | GRCh37 |
| EMC2    | 0 | . | GRCh37 |
| EMC2    | 0 | . | GRCh37 |
| EML1    | 0 | . | GRCh37 |
| EML1    | 0 | . | GRCh37 |
| EML1    | 0 | . | GRCh37 |
| EN1     | 0 | . | GRCh37 |
| ENG     | 0 | . | GRCh37 |
| ENOX1   | 0 | . | GRCh37 |
| ENTPD1  | 0 | . | GRCh37 |
| ENTPD5  | 0 | . | GRCh37 |
| EP400   | 0 | . | GRCh37 |
| EPHB6   | 0 | . | GRCh37 |
| EPHX1   | 0 | . | GRCh37 |
| EPHX2   | 0 | . | GRCh37 |
| ERN1    | 0 | . | GRCh37 |
| ESPL1   | 0 | . | GRCh37 |
| ESYT3   | 0 | . | GRCh37 |
| ETFA    | 0 | . | GRCh37 |
| ETFB    | 0 | . | GRCh37 |
| ETHE1   | 0 | . | GRCh37 |
| EVI5    | 0 | . | GRCh37 |
| EVI5L   | 0 | . | GRCh37 |
| EVI5L   | 0 | . | GRCh37 |
| EVPL    | 0 | . | GRCh37 |
| EVPL    | 0 | . | GRCh37 |
| EXD2    | 0 | . | GRCh37 |
| EXO1    | 0 | . | GRCh37 |
| EXOC1   | 0 | . | GRCh37 |
| EZR     | 0 | . | GRCh37 |
| F8      | 0 | . | GRCh37 |
| F8      | 0 | . | GRCh37 |
| F9      | 0 | . | GRCh37 |
| FAAH2   | 0 | . | GRCh37 |
| FADS2   | 0 | . | GRCh37 |
| FADS3   | 0 | . | GRCh37 |
| FAH     | 0 | . | GRCh37 |
| FAM118A | 0 | . | GRCh37 |
| FAM122C | 0 | . | GRCh37 |
| FAM122C | 0 | . | GRCh37 |
| FAM127C | 0 | . | GRCh37 |
| FAM127C | 0 | . | GRCh37 |
| FAM135B | 0 | . | GRCh37 |
| FAM162B | 0 | . | GRCh37 |
| FAM168A | 0 | . | GRCh37 |

VEP annotated somatic variants

|         |   |   |        |
|---------|---|---|--------|
| FAM181B | 0 | . | GRCh37 |
| FAM184B | 0 | . | GRCh37 |
| FAM186A | 0 | . | GRCh37 |
| FAM187B | 0 | . | GRCh37 |
| FAM189B | 0 | . | GRCh37 |
| FAM21C  | 0 | . | GRCh37 |
| FAM63A  | 0 | . | GRCh37 |
| FAM65B  | 0 | . | GRCh37 |
| FAM81B  | 0 | . | GRCh37 |
| FANCA   | 0 | . | GRCh37 |
| FANCE   | 0 | . | GRCh37 |
| FANCE   | 0 | . | GRCh37 |
| FANCE   | 0 | . | GRCh37 |
| FAR2    | 0 | . | GRCh37 |
| FARP2   | 0 | . | GRCh37 |
| FARP2   | 0 | . | GRCh37 |
| FASN    | 0 | . | GRCh37 |
| FASN    | 0 | . | GRCh37 |
| FASN    | 0 | . | GRCh37 |
| FASN    | 0 | . | GRCh37 |
| FBLN2   | 0 | . | GRCh37 |
| FBN3    | 0 | . | GRCh37 |
| FBRSL1  | 0 | . | GRCh37 |
| FBXL21  | 0 | . | GRCh37 |
| FBXO10  | 0 | . | GRCh37 |
| FBXO10  | 0 | . | GRCh37 |
| FBXO17  | 0 | . | GRCh37 |
| FBXW12  | 0 | . | GRCh37 |
| FBXW4   | 0 | . | GRCh37 |
| FCAMR   | 0 | . | GRCh37 |
| FCHO1   | 0 | . | GRCh37 |
| FGFR4   | 0 | . | GRCh37 |
| FGG     | 0 | . | GRCh37 |
| FHOD3   | 0 | . | GRCh37 |
| FHOD3   | 0 | . | GRCh37 |
| FHOD3   | 0 | . | GRCh37 |
| FIGN    | 0 | . | GRCh37 |
| FIP1L1  | 0 | . | GRCh37 |
| FKBP6   | 0 | . | GRCh37 |
| FKBP7   | 0 | . | GRCh37 |
| FLNA    | 0 | . | GRCh37 |
| FLNB    | 0 | . | GRCh37 |
| FLT4    | 0 | . | GRCh37 |
| FMN2    | 0 | . | GRCh37 |
| FMN2    | 0 | . | GRCh37 |
| FMO3    | 0 | . | GRCh37 |
| FNBP4   | 0 | . | GRCh37 |
| FNBP4   | 0 | . | GRCh37 |
| FNDC1   | 0 | . | GRCh37 |
| FNDC1   | 0 | . | GRCh37 |
| FOXF2   | 0 | . | GRCh37 |
| FOXP4   | 0 | . | GRCh37 |
| FPGS    | 0 | . | GRCh37 |
| FRAS1   | 0 | . | GRCh37 |
| FRAS1   | 0 | . | GRCh37 |

VEP annotated somatic variants

|         |   |   |        |
|---------|---|---|--------|
| FRAS1   | 0 | . | GRCh37 |
| FRAS1   | 0 | . | GRCh37 |
| FRAS1   | 0 | . | GRCh37 |
| FREM3   | 0 | . | GRCh37 |
| FRMD4A  | 0 | . | GRCh37 |
| FSIP1   | 0 | . | GRCh37 |
| FSTL5   | 0 | . | GRCh37 |
| FUBP3   | 0 | . | GRCh37 |
| FUT1    | 0 | . | GRCh37 |
| FUT6    | 0 | . | GRCh37 |
| FXYD2   | 0 | . | GRCh37 |
| FYCO1   | 0 | . | GRCh37 |
| GADL1   | 0 | . | GRCh37 |
| GAK     | 0 | . | GRCh37 |
| GAK     | 0 | . | GRCh37 |
| GALC    | 0 | . | GRCh37 |
| GALC    | 0 | . | GRCh37 |
| GALK1   | 0 | . | GRCh37 |
| GALNT10 | 0 | . | GRCh37 |
| GALNT14 | 0 | . | GRCh37 |
| GALNT8  | 0 | . | GRCh37 |
| GALNT8  | 0 | . | GRCh37 |
| GAREM   | 0 | . | GRCh37 |
| GAREM   | 0 | . | GRCh37 |
| GAREM   | 0 | . | GRCh37 |
| GARNL3  | 0 | . | GRCh37 |
| GBP5    | 0 | . | GRCh37 |
| GBP5    | 0 | . | GRCh37 |
| GBP5    | 0 | . | GRCh37 |
| GCGR    | 0 | . | GRCh37 |
| GCNT2   | 0 | . | GRCh37 |
| GDA     | 0 | . | GRCh37 |
| GDAP1L1 | 0 | . | GRCh37 |
| GDF2    | 0 | . | GRCh37 |
| GEMIN2  | 0 | . | GRCh37 |
| GFM1    | 0 | . | GRCh37 |
| GGCX    | 0 | . | GRCh37 |
| GGN     | 0 | . | GRCh37 |
| GGN     | 0 | . | GRCh37 |
| GHDC    | 0 | . | GRCh37 |
| GINM1   | 0 | . | GRCh37 |
| GINS1   | 0 | . | GRCh37 |
| GLG1    | 0 | . | GRCh37 |
| GLG1    | 0 | . | GRCh37 |
| GLIS2   | 0 | . | GRCh37 |
| GLO1    | 0 | . | GRCh37 |
| GLRA4   | 0 | . | GRCh37 |
| GLRA4   | 0 | . | GRCh37 |
| GLT8D2  | 0 | . | GRCh37 |
| GLYATL2 | 0 | . | GRCh37 |
| GMCL1   | 0 | . | GRCh37 |
| GNAZ    | 0 | . | GRCh37 |
| GNB1L   | 0 | . | GRCh37 |
| GNRHR   | 0 | . | GRCh37 |
| GOLGA3  | 0 | . | GRCh37 |

VEP annotated somatic variants

|           |   |   |        |
|-----------|---|---|--------|
| GP1BA     | 0 | . | GRCh37 |
| GPC6      | 0 | . | GRCh37 |
| GPLD1     | 0 | . | GRCh37 |
| GPM6B     | 0 | . | GRCh37 |
| GPN1      | 0 | . | GRCh37 |
| GPR101    | 0 | . | GRCh37 |
| GPR123    | 0 | . | GRCh37 |
| GPR123    | 0 | . | GRCh37 |
| GPR123    | 0 | . | GRCh37 |
| GPR123    | 0 | . | GRCh37 |
| GPR176    | 0 | . | GRCh37 |
| GRAMD1B   | 0 | . | GRCh37 |
| GRAMD1C   | 0 | . | GRCh37 |
| GRAMD4    | 0 | . | GRCh37 |
| GRAMD4    | 0 | . | GRCh37 |
| GRAMD4    | 0 | . | GRCh37 |
| GREB1     | 0 | . | GRCh37 |
| GRIA1     | 0 | . | GRCh37 |
| GRIA2     | 0 | . | GRCh37 |
| GRIA3     | 0 | . | GRCh37 |
| GRM7      | 0 | . | GRCh37 |
| GSE1      | 0 | . | GRCh37 |
| GSN       | 0 | . | GRCh37 |
| GSPT2     | 0 | . | GRCh37 |
| GSTP1     | 0 | . | GRCh37 |
| GSTZ1     | 0 | . | GRCh37 |
| GTPBP4    | 0 | . | GRCh37 |
| GTPBP4    | 0 | . | GRCh37 |
| GUCY2F    | 0 | . | GRCh37 |
| GXYLT2    | 0 | . | GRCh37 |
| HAL       | 0 | . | GRCh37 |
| HAMP      | 0 | . | GRCh37 |
| HDAC7     | 0 | . | GRCh37 |
| HDAC7     | 0 | . | GRCh37 |
| HDAC9     | 0 | . | GRCh37 |
| HDDC2     | 0 | . | GRCh37 |
| HDHD1     | 0 | . | GRCh37 |
| HEATR1    | 0 | . | GRCh37 |
| HEATR1    | 0 | . | GRCh37 |
| HEATR1    | 0 | . | GRCh37 |
| HEATR2    | 0 | . | GRCh37 |
| HECTD1    | 0 | . | GRCh37 |
| HECTD1    | 0 | . | GRCh37 |
| HELLS     | 0 | . | GRCh37 |
| HELLS     | 0 | . | GRCh37 |
| HEMK1     | 0 | . | GRCh37 |
| HERC1     | 0 | . | GRCh37 |
| HFE       | 0 | . | GRCh37 |
| HGF       | 0 | . | GRCh37 |
| HHATL     | 0 | . | GRCh37 |
| HHIPL1    | 0 | . | GRCh37 |
| HIGD1B    | 0 | . | GRCh37 |
| HINT1     | 0 | . | GRCh37 |
| HIST1H2BF | 0 | . | GRCh37 |
| HIST1H3D  | 0 | . | GRCh37 |

VEP annotated somatic variants

|          |   |   |        |
|----------|---|---|--------|
| HIST1H4B | 0 | . | GRCh37 |
| HKDC1    | 0 | . | GRCh37 |
| HLA-DPB1 | 0 | . | GRCh37 |
| HLCS     | 0 | . | GRCh37 |
| HLTF     | 0 | . | GRCh37 |
| HMBS     | 0 | . | GRCh37 |
| HMGXB4   | 0 | . | GRCh37 |
| HMGXB4   | 0 | . | GRCh37 |
| HNF1A    | 0 | . | GRCh37 |
| HNRNPUL1 | 0 | . | GRCh37 |
| HOOK2    | 0 | . | GRCh37 |
| HPN      | 0 | . | GRCh37 |
| HPS6     | 0 | . | GRCh37 |
| HSPB6    | 0 | . | GRCh37 |
| HTR5A    | 0 | . | GRCh37 |
| HUWE1    | 0 | . | GRCh37 |
| HUWE1    | 0 | . | GRCh37 |
| ICOSLG   | 0 | . | GRCh37 |
| ICOSLG   | 0 | . | GRCh37 |
| ICOSLG   | 0 | . | GRCh37 |
| IDH2     | 0 | . | GRCh37 |
| IDH3A    | 0 | . | GRCh37 |
| IFI16    | 0 | . | GRCh37 |
| IFNAR2   | 0 | . | GRCh37 |
| IGF1R    | 0 | . | GRCh37 |
| IGF2R    | 0 | . | GRCh37 |
| IGF2R    | 0 | . | GRCh37 |
| IGF2R    | 0 | . | GRCh37 |
| IGLON5   | 0 | . | GRCh37 |
| IGSF1    | 0 | . | GRCh37 |
| IGSF1    | 0 | . | GRCh37 |
| IGSF1    | 0 | . | GRCh37 |
| IGSF11   | 0 | . | GRCh37 |
| IGSF11   | 0 | . | GRCh37 |
| IGSF11   | 0 | . | GRCh37 |
| IGSF22   | 0 | . | GRCh37 |
| IGSF9B   | 0 | . | GRCh37 |
| IKBKAP   | 0 | . | GRCh37 |
| IL17RC   | 0 | . | GRCh37 |
| IL20RA   | 0 | . | GRCh37 |
| IL22RA1  | 0 | . | GRCh37 |
| IL2RA    | 0 | . | GRCh37 |
| INO80E   | 0 | . | GRCh37 |
| INS      | 0 | . | GRCh37 |
| INS-IGF2 | 0 | . | GRCh37 |
| INSR     | 0 | . | GRCh37 |
| INSR     | 0 | . | GRCh37 |
| INTS1    | 0 | . | GRCh37 |
| INTS1    | 0 | . | GRCh37 |
| INTS6    | 0 | . | GRCh37 |
| IQGAP2   | 0 | . | GRCh37 |
| IQGAP3   | 0 | . | GRCh37 |
| IQSEC3   | 0 | . | GRCh37 |
| IRF5     | 0 | . | GRCh37 |
| IRGC     | 0 | . | GRCh37 |

VEP annotated somatic variants

|          |   |   |        |
|----------|---|---|--------|
| ITGA10   | 0 | . | GRCh37 |
| ITGA10   | 0 | . | GRCh37 |
| ITGA4    | 0 | . | GRCh37 |
| ITGA9    | 0 | . | GRCh37 |
| ITIH4    | 0 | . | GRCh37 |
| ITIH4    | 0 | . | GRCh37 |
| ITIH4    | 0 | . | GRCh37 |
| ITM2A    | 0 | . | GRCh37 |
| ITPKB    | 0 | . | GRCh37 |
| ITPR2    | 0 | . | GRCh37 |
| ITPR2    | 0 | . | GRCh37 |
| ITPR3    | 0 | . | GRCh37 |
| ITPRIP   | 0 | . | GRCh37 |
| ITSN1    | 0 | . | GRCh37 |
| ITSN1    | 0 | . | GRCh37 |
| JADE1    | 0 | . | GRCh37 |
| JADE3    | 0 | . | GRCh37 |
| JAKMIP3  | 0 | . | GRCh37 |
| JARID2   | 0 | . | GRCh37 |
| JARID2   | 0 | . | GRCh37 |
| JARID2   | 0 | . | GRCh37 |
| JRKL     | 0 | . | GRCh37 |
| KANK1    | 0 | . | GRCh37 |
| KANK4    | 0 | . | GRCh37 |
| KANK4    | 0 | . | GRCh37 |
| KANK4    | 0 | . | GRCh37 |
| KANK4    | 0 | . | GRCh37 |
| KATNA1   | 0 | . | GRCh37 |
| KCNA7    | 0 | . | GRCh37 |
| KCNAB1   | 0 | . | GRCh37 |
| KCNU1    | 0 | . | GRCh37 |
| KCP      | 0 | . | GRCh37 |
| KCTD10   | 0 | . | GRCh37 |
| KCTD4    | 0 | . | GRCh37 |
| KDM3B    | 0 | . | GRCh37 |
| KDM4A    | 0 | . | GRCh37 |
| KDM4B    | 0 | . | GRCh37 |
| KDM5D    | 0 | . | GRCh37 |
| KDM6A    | 0 | . | GRCh37 |
| KDM7A    | 0 | . | GRCh37 |
| KDM7A    | 0 | . | GRCh37 |
| KDM7A    | 0 | . | GRCh37 |
| KIAA0930 | 0 | . | GRCh37 |
| KIAA1109 | 0 | . | GRCh37 |
| KIAA1244 | 0 | . | GRCh37 |
| KIAA1429 | 0 | . | GRCh37 |
| KIAA1683 | 0 | . | GRCh37 |
| KIAA1919 | 0 | . | GRCh37 |
| KIF14    | 0 | . | GRCh37 |
| KIF17    | 0 | . | GRCh37 |
| KIF19    | 0 | . | GRCh37 |
| KIF1A    | 0 | . | GRCh37 |
| KIF1C    | 0 | . | GRCh37 |
| KIF20B   | 0 | . | GRCh37 |
| KIFAP3   | 0 | . | GRCh37 |
| KIN      | 0 | . | GRCh37 |

VEP annotated somatic variants

|           |   |   |        |
|-----------|---|---|--------|
| KLF10     | 0 | . | GRCh37 |
| KLHL2     | 0 | . | GRCh37 |
| KLHL8     | 0 | . | GRCh37 |
| KLRG1     | 0 | . | GRCh37 |
| KMT2C     | 0 | . | GRCh37 |
| KNDC1     | 0 | . | GRCh37 |
| KNTC1     | 0 | . | GRCh37 |
| KPNA7     | 0 | . | GRCh37 |
| KPNB1     | 0 | . | GRCh37 |
| KREMEN1   | 0 | . | GRCh37 |
| KRT10     | 0 | . | GRCh37 |
| KRT32     | 0 | . | GRCh37 |
| KRT36     | 0 | . | GRCh37 |
| KRTAP10-9 | 0 | . | GRCh37 |
| KRTAP12-3 | 0 | . | GRCh37 |
| KRTAP12-4 | 0 | . | GRCh37 |
| L3MBTL2   | 0 | . | GRCh37 |
| LAMA2     | 0 | . | GRCh37 |
| LAMA2     | 0 | . | GRCh37 |
| LAMA4     | 0 | . | GRCh37 |
| LAMA4     | 0 | . | GRCh37 |
| LAMC1     | 0 | . | GRCh37 |
| LAMC1     | 0 | . | GRCh37 |
| LAMC1     | 0 | . | GRCh37 |
| LAMC2     | 0 | . | GRCh37 |
| LATS1     | 0 | . | GRCh37 |
| LCE3C     | 0 | . | GRCh37 |
| LCN8      | 0 | . | GRCh37 |
| LDLRAD2   | 0 | . | GRCh37 |
| LEMD3     | 0 | . | GRCh37 |
| LFNG      | 0 | . | GRCh37 |
| LILRA4    | 0 | . | GRCh37 |
| LIMK1     | 0 | . | GRCh37 |
| LINGO3    | 0 | . | GRCh37 |
| LMBR1L    | 0 | . | GRCh37 |
| LMO7      | 0 | . | GRCh37 |
| LNPEP     | 0 | . | GRCh37 |
| LONRF1    | 0 | . | GRCh37 |
| LONRF3    | 0 | . | GRCh37 |
| LONRF3    | 0 | . | GRCh37 |
| LOXL1     | 0 | . | GRCh37 |
| LPP       | 0 | . | GRCh37 |
| LRMP      | 0 | . | GRCh37 |
| LRP1B     | 0 | . | GRCh37 |
| LRP5      | 0 | . | GRCh37 |
| LRP5L     | 0 | . | GRCh37 |
| LRP5L     | 0 | . | GRCh37 |
| LRPAP1    | 0 | . | GRCh37 |
| LRR1      | 0 | . | GRCh37 |
| LRRC18    | 0 | . | GRCh37 |
| LRRCC1    | 0 | . | GRCh37 |
| LRRIQ1    | 0 | . | GRCh37 |
| LSG1      | 0 | . | GRCh37 |
| LSM14A    | 0 | . | GRCh37 |
| LSM6      | 0 | . | GRCh37 |

VEP annotated somatic variants

|          |   |   |        |
|----------|---|---|--------|
| LSS      | 0 | . | GRCh37 |
| LTN1     | 0 | . | GRCh37 |
| LUZP2    | 0 | . | GRCh37 |
| LYPD4    | 0 | . | GRCh37 |
| LYSMD1   | 0 | . | GRCh37 |
| LZTS2    | 0 | . | GRCh37 |
| LZTS2    | 0 | . | GRCh37 |
| MAD1L1   | 0 | . | GRCh37 |
| MAD2L1   | 0 | . | GRCh37 |
| MAGEA1   | 0 | . | GRCh37 |
| MAGEA12  | 0 | . | GRCh37 |
| MAGEB4   | 0 | . | GRCh37 |
| MAGEC1   | 0 | . | GRCh37 |
| MAGEC2   | 0 | . | GRCh37 |
| MAGED2   | 0 | . | GRCh37 |
| MAMDC4   | 0 | . | GRCh37 |
| MAMLD1   | 0 | . | GRCh37 |
| MAN1A1   | 0 | . | GRCh37 |
| MAN2A1   | 0 | . | GRCh37 |
| MAN2B2   | 0 | . | GRCh37 |
| MAP1S    | 0 | . | GRCh37 |
| MAP3K15  | 0 | . | GRCh37 |
| MAP3K3   | 0 | . | GRCh37 |
| MAP4K1   | 0 | . | GRCh37 |
| MAP4K4   | 0 | . | GRCh37 |
| MAPKAPK3 | 0 | . | GRCh37 |
| MAST1    | 0 | . | GRCh37 |
| MAST1    | 0 | . | GRCh37 |
| MAST4    | 0 | . | GRCh37 |
| MATN4    | 0 | . | GRCh37 |
| MCCC1    | 0 | . | GRCh37 |
| MCM3AP   | 0 | . | GRCh37 |
| MDGA1    | 0 | . | GRCh37 |
| MDN1     | 0 | . | GRCh37 |
| MDN1     | 0 | . | GRCh37 |
| MECP2    | 0 | . | GRCh37 |
| MED14    | 0 | . | GRCh37 |
| MED22    | 0 | . | GRCh37 |
| MED25    | 0 | . | GRCh37 |
| MED29    | 0 | . | GRCh37 |
| MEF2B    | 0 | . | GRCh37 |
| MEGF6    | 0 | . | GRCh37 |
| MEP1B    | 0 | . | GRCh37 |
| MERTK    | 0 | . | GRCh37 |
| METTL3   | 0 | . | GRCh37 |
| METTL8   | 0 | . | GRCh37 |
| MFSD12   | 0 | . | GRCh37 |
| MGAT5B   | 0 | . | GRCh37 |
| MGAT5B   | 0 | . | GRCh37 |
| MGAT5B   | 0 | . | GRCh37 |
| MGMT     | 0 | . | GRCh37 |
| MICAL3   | 0 | . | GRCh37 |
| MICAL3   | 0 | . | GRCh37 |
| MICAL3   | 0 | . | GRCh37 |
| MID1     | 0 | . | GRCh37 |



VEP annotated somatic variants

|         |   |   |        |
|---------|---|---|--------|
| MINK1   | 0 | . | GRCh37 |
| MINK1   | 0 | . | GRCh37 |
| MLEC    | 0 | . | GRCh37 |
| MLK4    | 0 | . | GRCh37 |
| MLLT1   | 0 | . | GRCh37 |
| MMP21   | 0 | . | GRCh37 |
| MNX1    | 0 | . | GRCh37 |
| MOB3A   | 0 | . | GRCh37 |
| MORC4   | 0 | . | GRCh37 |
| MORC4   | 0 | . | GRCh37 |
| MORF4L1 | 0 | . | GRCh37 |
| MPZL3   | 0 | . | GRCh37 |
| MRE11A  | 0 | . | GRCh37 |
| MROH7   | 0 | . | GRCh37 |
| MROH7   | 0 | . | GRCh37 |
| MROH7   | 0 | . | GRCh37 |
| MRPL10  | 0 | . | GRCh37 |
| MRPL41  | 0 | . | GRCh37 |
| MRPL43  | 0 | . | GRCh37 |
| MRPS10  | 0 | . | GRCh37 |
| MRVI1   | 0 | . | GRCh37 |
| MSH2    | 0 | . | GRCh37 |
| MSMO1   | 0 | . | GRCh37 |
| MTOR    | 0 | . | GRCh37 |
| MTR     | 0 | . | GRCh37 |
| MTR     | 0 | . | GRCh37 |
| MTR     | 0 | . | GRCh37 |
| MTR     | 0 | . | GRCh37 |
| MTTP    | 0 | . | GRCh37 |
| MUC16   | 0 | . | GRCh37 |
| MUC16   | 0 | . | GRCh37 |
| MUC19   | 0 | . | GRCh37 |
| MUC19   | 0 | . | GRCh37 |
| MUC2    | 0 | . | GRCh37 |
| MVD     | 0 | . | GRCh37 |
| MXRA5   | 0 | . | GRCh37 |
| MYADML2 | 0 | . | GRCh37 |
| MYBPC3  | 0 | . | GRCh37 |
| MYH11   | 0 | . | GRCh37 |
| MYH15   | 0 | . | GRCh37 |
| MYH7    | 0 | . | GRCh37 |
| MYH7    | 0 | . | GRCh37 |
| MYH7    | 0 | . | GRCh37 |
| MYH9    | 0 | . | GRCh37 |
| MYLK    | 0 | . | GRCh37 |
| MYO15A  | 0 | . | GRCh37 |
| MYO18B  | 0 | . | GRCh37 |
| MYO19   | 0 | . | GRCh37 |
| MYO1F   | 0 | . | GRCh37 |
| MYO5A   | 0 | . | GRCh37 |
| MYO9B   | 0 | . | GRCh37 |
| MYOG    | 0 | . | GRCh37 |
| MYPN    | 0 | . | GRCh37 |
| MYRF    | 0 | . | GRCh37 |
| MYSM1   | 0 | . | GRCh37 |

VEP annotated somatic variants

|          |   |   |        |
|----------|---|---|--------|
| NAA35    | 0 | . | GRCh37 |
| NACC2    | 0 | . | GRCh37 |
| NAGPA    | 0 | . | GRCh37 |
| NAPSA    | 0 | . | GRCh37 |
| NAT9     | 0 | . | GRCh37 |
| NBAS     | 0 | . | GRCh37 |
| NBR1     | 0 | . | GRCh37 |
| NBR1     | 0 | . | GRCh37 |
| NBR1     | 0 | . | GRCh37 |
| NBR1     | 0 | . | GRCh37 |
| NCAN     | 0 | . | GRCh37 |
| NCAPD2   | 0 | . | GRCh37 |
| NCAPD3   | 0 | . | GRCh37 |
| NCAPH    | 0 | . | GRCh37 |
| NCOA6    | 0 | . | GRCh37 |
| NCOR1    | 0 | . | GRCh37 |
| NDUFS2   | 0 | . | GRCh37 |
| NEB      | 0 | . | GRCh37 |
| NEB      | 0 | . | GRCh37 |
| NEB      | 0 | . | GRCh37 |
| NELFA    | 0 | . | GRCh37 |
| NENF     | 0 | . | GRCh37 |
| NENF     | 0 | . | GRCh37 |
| NEXN     | 0 | . | GRCh37 |
| NFKB1    | 0 | . | GRCh37 |
| NFKB2    | 0 | . | GRCh37 |
| NFKBIZ   | 0 | . | GRCh37 |
| NHLRC1   | 0 | . | GRCh37 |
| NHSL1    | 0 | . | GRCh37 |
| NID1     | 0 | . | GRCh37 |
| NIN      | 0 | . | GRCh37 |
| NIPAL3   | 0 | . | GRCh37 |
| NIPAL4   | 0 | . | GRCh37 |
| NIPBL    | 0 | . | GRCh37 |
| NIPSNAP1 | 0 | . | GRCh37 |
| NISCH    | 0 | . | GRCh37 |
| NKX2-8   | 0 | . | GRCh37 |
| NLGN3    | 0 | . | GRCh37 |
| NLRC4    | 0 | . | GRCh37 |
| NLRP5    | 0 | . | GRCh37 |
| NLRP5    | 0 | . | GRCh37 |
| NLRP5    | 0 | . | GRCh37 |
| NLRP9    | 0 | . | GRCh37 |
| NOC4L    | 0 | . | GRCh37 |
| NOL6     | 0 | . | GRCh37 |
| NOP14    | 0 | . | GRCh37 |
| NOP56    | 0 | . | GRCh37 |
| NOS1AP   | 0 | . | GRCh37 |
| NOS3     | 0 | . | GRCh37 |
| NOS3     | 0 | . | GRCh37 |
| NOTCH1   | 0 | . | GRCh37 |
| NOTCH1   | 0 | . | GRCh37 |
| NPC1L1   | 0 | . | GRCh37 |
| NPFFR1   | 0 | . | GRCh37 |
| NPSR1    | 0 | . | GRCh37 |

VEP annotated somatic variants

|        |   |   |        |
|--------|---|---|--------|
| NPTX2  | 0 | . | GRCh37 |
| NR1D2  | 0 | . | GRCh37 |
| NR1I3  | 0 | . | GRCh37 |
| NRDE2  | 0 | . | GRCh37 |
| NSD1   | 0 | . | GRCh37 |
| NSUN2  | 0 | . | GRCh37 |
| NT5DC2 | 0 | . | GRCh37 |
| NTF4   | 0 | . | GRCh37 |
| NUDCD3 | 0 | . | GRCh37 |
| NUFIP1 | 0 | . | GRCh37 |
| NUGGC  | 0 | . | GRCh37 |
| NUP107 | 0 | . | GRCh37 |
| NUP214 | 0 | . | GRCh37 |
| NUP43  | 0 | . | GRCh37 |
| NUP50  | 0 | . | GRCh37 |
| NUP54  | 0 | . | GRCh37 |
| NUP54  | 0 | . | GRCh37 |
| NUP88  | 0 | . | GRCh37 |
| NUP88  | 0 | . | GRCh37 |
| NXF3   | 0 | . | GRCh37 |
| NXF5   | 0 | . | GRCh37 |
| NXF5   | 0 | . | GRCh37 |
| NXF5   | 0 | . | GRCh37 |
| NXN    | 0 | . | GRCh37 |
| OARD1  | 0 | . | GRCh37 |
| OBSL1  | 0 | . | GRCh37 |
| OGFOD3 | 0 | . | GRCh37 |
| OPA3   | 0 | . | GRCh37 |
| OR2AE1 | 0 | . | GRCh37 |
| OR3A1  | 0 | . | GRCh37 |
| OR4A16 | 0 | . | GRCh37 |
| OR4A5  | 0 | . | GRCh37 |
| OR4C16 | 0 | . | GRCh37 |
| OR51B4 | 0 | . | GRCh37 |
| OR52N1 | 0 | . | GRCh37 |
| OR5AU1 | 0 | . | GRCh37 |
| OR5H15 | 0 | . | GRCh37 |
| OR5I1  | 0 | . | GRCh37 |
| OR5T1  | 0 | . | GRCh37 |
| OSBPL2 | 0 | . | GRCh37 |
| OSGIN1 | 0 | . | GRCh37 |
| OSGIN1 | 0 | . | GRCh37 |
| OSMR   | 0 | . | GRCh37 |
| OTUD7A | 0 | . | GRCh37 |
| OXA1L  | 0 | . | GRCh37 |
| P2RY4  | 0 | . | GRCh37 |
| P4HB   | 0 | . | GRCh37 |
| PABPC4 | 0 | . | GRCh37 |
| PACS1  | 0 | . | GRCh37 |
| PAGE5  | 0 | . | GRCh37 |
| PALM   | 0 | . | GRCh37 |
| PANK1  | 0 | . | GRCh37 |
| PANK1  | 0 | . | GRCh37 |
| PANK4  | 0 | . | GRCh37 |
| PAPOLG | 0 | . | GRCh37 |

VEP annotated somatic variants

|         |   |   |        |
|---------|---|---|--------|
| PARS2   | 0 | . | GRCh37 |
| PARVA   | 0 | . | GRCh37 |
| PARVB   | 0 | . | GRCh37 |
| PAX8    | 0 | . | GRCh37 |
| PBOV1   | 0 | . | GRCh37 |
| PCDH15  | 0 | . | GRCh37 |
| PCDH9   | 0 | . | GRCh37 |
| PCLO    | 0 | . | GRCh37 |
| PCMT1   | 0 | . | GRCh37 |
| PCNT    | 0 | . | GRCh37 |
| PDE12   | 0 | . | GRCh37 |
| PDE1A   | 0 | . | GRCh37 |
| PDE2A   | 0 | . | GRCh37 |
| PDE6C   | 0 | . | GRCh37 |
| PDGFRA  | 0 | . | GRCh37 |
| PDGFRB  | 0 | . | GRCh37 |
| PDGFRB  | 0 | . | GRCh37 |
| PDSS1   | 0 | . | GRCh37 |
| PDXDC1  | 0 | . | GRCh37 |
| PDXDC1  | 0 | . | GRCh37 |
| PDZD7   | 0 | . | GRCh37 |
| PEAK1   | 0 | . | GRCh37 |
| PEAR1   | 0 | . | GRCh37 |
| PEAR1   | 0 | . | GRCh37 |
| PEAR1   | 0 | . | GRCh37 |
| PEAR1   | 0 | . | GRCh37 |
| PEPD    | 0 | . | GRCh37 |
| PEPD    | 0 | . | GRCh37 |
| PFKP    | 0 | . | GRCh37 |
| PFKP    | 0 | . | GRCh37 |
| PGAP1   | 0 | . | GRCh37 |
| PGK1    | 0 | . | GRCh37 |
| PGLYRP2 | 0 | . | GRCh37 |
| PGLYRP3 | 0 | . | GRCh37 |
| PHF2    | 0 | . | GRCh37 |
| PHIP    | 0 | . | GRCh37 |
| PHKA1   | 0 | . | GRCh37 |
| PHLDB1  | 0 | . | GRCh37 |
| PHRF1   | 0 | . | GRCh37 |
| PIFO    | 0 | . | GRCh37 |
| PIGK    | 0 | . | GRCh37 |
| PIGN    | 0 | . | GRCh37 |
| PIGW    | 0 | . | GRCh37 |
| PIK3R5  | 0 | . | GRCh37 |
| PIKFYVE | 0 | . | GRCh37 |
| PIM3    | 0 | . | GRCh37 |
| PIWIL3  | 0 | . | GRCh37 |
| PJA1    | 0 | . | GRCh37 |
| PKD1L2  | 0 | . | GRCh37 |
| PKHD1   | 0 | . | GRCh37 |
| PKP2    | 0 | . | GRCh37 |
| PLA2G7  | 0 | . | GRCh37 |
| PLAT    | 0 | . | GRCh37 |
| PLB1    | 0 | . | GRCh37 |
| PLCE1   | 0 | . | GRCh37 |
| PLCE1   | 0 | . | GRCh37 |

VEP annotated somatic variants

|              |   |   |        |
|--------------|---|---|--------|
| PLCE1        | 0 | . | GRCh37 |
| PLCE1        | 0 | . | GRCh37 |
| PLCG2        | 0 | . | GRCh37 |
| PLCH2        | 0 | . | GRCh37 |
| PLCH2        | 0 | . | GRCh37 |
| PLEC         | 0 | . | GRCh37 |
| PLEC         | 0 | . | GRCh37 |
| PLEC         | 0 | . | GRCh37 |
| PLEC         | 0 | . | GRCh37 |
| PLEC         | 0 | . | GRCh37 |
| PLEKHG5      | 0 | . | GRCh37 |
| PLEKHH1      | 0 | . | GRCh37 |
| PLEKHH1      | 0 | . | GRCh37 |
| PLEKHH1      | 0 | . | GRCh37 |
| PLEKHN1      | 0 | . | GRCh37 |
| PLK5         | 0 | . | GRCh37 |
| PLXDC1       | 0 | . | GRCh37 |
| PLXNB2       | 0 | . | GRCh37 |
| PNISR        | 0 | . | GRCh37 |
| PNPLA1       | 0 | . | GRCh37 |
| PNPLA3       | 0 | . | GRCh37 |
| PNPLA6       | 0 | . | GRCh37 |
| POC1B-GALNT4 | 0 | . | GRCh37 |
| POLR2G       | 0 | . | GRCh37 |
| POLR3F       | 0 | . | GRCh37 |
| POLR3F       | 0 | . | GRCh37 |
| POSTN        | 0 | . | GRCh37 |
| POU5F1B      | 0 | . | GRCh37 |
| PPARG        | 0 | . | GRCh37 |
| PPARG        | 0 | . | GRCh37 |
| PPIL2        | 0 | . | GRCh37 |
| PPM1E        | 0 | . | GRCh37 |
| PPOX         | 0 | . | GRCh37 |
| PPP1R27      | 0 | . | GRCh37 |
| PPP2R2D      | 0 | . | GRCh37 |
| PPP2R3A      | 0 | . | GRCh37 |
| PQBP1        | 0 | . | GRCh37 |
| PRDM5        | 0 | . | GRCh37 |
| PRDM8        | 0 | . | GRCh37 |
| PRDX4        | 0 | . | GRCh37 |
| PRDX4        | 0 | . | GRCh37 |
| PRDX4        | 0 | . | GRCh37 |
| PREP         | 0 | . | GRCh37 |
| PREX2        | 0 | . | GRCh37 |
| PRG2         | 0 | . | GRCh37 |
| PRIMPOL      | 0 | . | GRCh37 |
| PRKCD        | 0 | . | GRCh37 |
| PRKCD        | 0 | . | GRCh37 |
| PRKCZ        | 0 | . | GRCh37 |
| PRMT5        | 0 | . | GRCh37 |
| PRR22        | 0 | . | GRCh37 |
| PRR5         | 0 | . | GRCh37 |
| PRR5-ARHGAP8 | 0 | . | GRCh37 |
| PRSS36       | 0 | . | GRCh37 |

VEP annotated somatic variants

|           |   |   |        |
|-----------|---|---|--------|
| PRUNE2    | 0 | . | GRCh37 |
| PSG2      | 0 | . | GRCh37 |
| PSG7      | 0 | . | GRCh37 |
| PSG9      | 0 | . | GRCh37 |
| PSMD12    | 0 | . | GRCh37 |
| PSMG1     | 0 | . | GRCh37 |
| PSMG2     | 0 | . | GRCh37 |
| PTGR1     | 0 | . | GRCh37 |
| PTPRE     | 0 | . | GRCh37 |
| PTPRF     | 0 | . | GRCh37 |
| PTPRG     | 0 | . | GRCh37 |
| PTPRK     | 0 | . | GRCh37 |
| PTPRN2    | 0 | . | GRCh37 |
| PTX4      | 0 | . | GRCh37 |
| PUM1      | 0 | . | GRCh37 |
| PUM1      | 0 | . | GRCh37 |
| PUM1      | 0 | . | GRCh37 |
| PUM1      | 0 | . | GRCh37 |
| PYGO1     | 0 | . | GRCh37 |
| PYROXD1   | 0 | . | GRCh37 |
| RAB11FIP4 | 0 | . | GRCh37 |
| RAB17     | 0 | . | GRCh37 |
| RAB38     | 0 | . | GRCh37 |
| RAB41     | 0 | . | GRCh37 |
| RABEP1    | 0 | . | GRCh37 |
| RABGGTA   | 0 | . | GRCh37 |
| RAC3      | 0 | . | GRCh37 |
| RAD51B    | 0 | . | GRCh37 |
| RADIL     | 0 | . | GRCh37 |
| RAF1      | 0 | . | GRCh37 |
| RAI14     | 0 | . | GRCh37 |
| RAP1GAP   | 0 | . | GRCh37 |
| RAPGEF3   | 0 | . | GRCh37 |
| RAPSN     | 0 | . | GRCh37 |
| RASSF1    | 0 | . | GRCh37 |
| RBM10     | 0 | . | GRCh37 |
| RBM26     | 0 | . | GRCh37 |
| RBM27     | 0 | . | GRCh37 |
| RBPMS     | 0 | . | GRCh37 |
| RECK      | 0 | . | GRCh37 |
| RELB      | 0 | . | GRCh37 |
| REPS1     | 0 | . | GRCh37 |
| RETNLB    | 0 | . | GRCh37 |
| RFPL1     | 0 | . | GRCh37 |
| RFT1      | 0 | . | GRCh37 |
| RFT1      | 0 | . | GRCh37 |
| RFTN1     | 0 | . | GRCh37 |
| RGL3      | 0 | . | GRCh37 |
| RGS7      | 0 | . | GRCh37 |
| RIBC2     | 0 | . | GRCh37 |
| RIPK4     | 0 | . | GRCh37 |
| RMND5A    | 0 | . | GRCh37 |
| RMND5A    | 0 | . | GRCh37 |
| RNASEH2A  | 0 | . | GRCh37 |
| RNASEL    | 0 | . | GRCh37 |

VEP annotated somatic variants

|               |   |   |        |
|---------------|---|---|--------|
| RND2          | 0 | . | GRCh37 |
| RNF175        | 0 | . | GRCh37 |
| RNF19B        | 0 | . | GRCh37 |
| RNF222        | 0 | . | GRCh37 |
| ROBO1         | 0 | . | GRCh37 |
| ROBO1         | 0 | . | GRCh37 |
| ROCK2         | 0 | . | GRCh37 |
| ROR1          | 0 | . | GRCh37 |
| ROS1          | 0 | . | GRCh37 |
| RP1-130H16.18 | 0 | . | GRCh37 |
| RP11-173B14.4 | 0 | . | GRCh37 |
| RP11-248J23.6 | 0 | . | GRCh37 |
| RP11-551L14.1 | 0 | . | GRCh37 |
| RP3-467K16.2  | 0 | . | GRCh37 |
| RPAP3         | 0 | . | GRCh37 |
| RPH3AL        | 0 | . | GRCh37 |
| RPL18A        | 0 | . | GRCh37 |
| RPL23A        | 0 | . | GRCh37 |
| RPL23A        | 0 | . | GRCh37 |
| RPL3          | 0 | . | GRCh37 |
| RPS4X         | 0 | . | GRCh37 |
| RPS6KA2       | 0 | . | GRCh37 |
| RPTOR         | 0 | . | GRCh37 |
| RPTOR         | 0 | . | GRCh37 |
| RRP1B         | 0 | . | GRCh37 |
| RRP1B         | 0 | . | GRCh37 |
| RSAD1         | 0 | . | GRCh37 |
| RSU1          | 0 | . | GRCh37 |
| RTN3          | 0 | . | GRCh37 |
| RUFY1         | 0 | . | GRCh37 |
| RUFY1         | 0 | . | GRCh37 |
| RUFY2         | 0 | . | GRCh37 |
| RXRA          | 0 | . | GRCh37 |
| RYR1          | 0 | . | GRCh37 |
| RYR1          | 0 | . | GRCh37 |
| RYR1          | 0 | . | GRCh37 |
| RYR1          | 0 | . | GRCh37 |
| RYR1          | 0 | . | GRCh37 |
| RYR2          | 0 | . | GRCh37 |
| RYR2          | 0 | . | GRCh37 |
| RYR3          | 0 | . | GRCh37 |
| SAP18         | 0 | . | GRCh37 |
| SARDH         | 0 | . | GRCh37 |
| SBDS          | 0 | . | GRCh37 |
| SBF1          | 0 | . | GRCh37 |
| SBF2          | 0 | . | GRCh37 |
| SCAF1         | 0 | . | GRCh37 |
| SCAMP3        | 0 | . | GRCh37 |
| SCARF2        | 0 | . | GRCh37 |
| SCEL          | 0 | . | GRCh37 |
| SCIN          | 0 | . | GRCh37 |
| SCLT1         | 0 | . | GRCh37 |
| SCLT1         | 0 | . | GRCh37 |
| SCML4         | 0 | . | GRCh37 |
| SCN3A         | 0 | . | GRCh37 |
| SCN9A         | 0 | . | GRCh37 |

VEP annotated somatic variants

|          |   |   |        |
|----------|---|---|--------|
| SCN9A    | 0 | . | GRCh37 |
| SDE2     | 0 | . | GRCh37 |
| SDK1     | 0 | . | GRCh37 |
| SEC13    | 0 | . | GRCh37 |
| SEC14L6  | 0 | . | GRCh37 |
| SEC16B   | 0 | . | GRCh37 |
| SEC23B   | 0 | . | GRCh37 |
| SEC24D   | 0 | . | GRCh37 |
| SEC31B   | 0 | . | GRCh37 |
| SEC31B   | 0 | . | GRCh37 |
| SEC31B   | 0 | . | GRCh37 |
| SEC31B   | 0 | . | GRCh37 |
| SECISBP2 | 0 | . | GRCh37 |
| SECTM1   | 0 | . | GRCh37 |
| SELE     | 0 | . | GRCh37 |
| SELP     | 0 | . | GRCh37 |
| SEMA3A   | 0 | . | GRCh37 |
| SEMA3A   | 0 | . | GRCh37 |
| SEMA3F   | 0 | . | GRCh37 |
| SEPT3    | 0 | . | GRCh37 |
| SERPINA3 | 0 | . | GRCh37 |
| SERTAD1  | 0 | . | GRCh37 |
| SETD1B   | 0 | . | GRCh37 |
| SETD1B   | 0 | . | GRCh37 |
| SETD5    | 0 | . | GRCh37 |
| SEZ6L    | 0 | . | GRCh37 |
| SF3B3    | 0 | . | GRCh37 |
| SF3B5    | 0 | . | GRCh37 |
| SGPL1    | 0 | . | GRCh37 |
| SGSM2    | 0 | . | GRCh37 |
| SGSM2    | 0 | . | GRCh37 |
| SGSM3    | 0 | . | GRCh37 |
| SH3GLB1  | 0 | . | GRCh37 |
| SH3PXD2A | 0 | . | GRCh37 |
| SHANK1   | 0 | . | GRCh37 |
| SHANK1   | 0 | . | GRCh37 |
| SHH      | 0 | . | GRCh37 |
| SHROOM2  | 0 | . | GRCh37 |
| SIGLEC12 | 0 | . | GRCh37 |
| SIK1     | 0 | . | GRCh37 |
| SIM2     | 0 | . | GRCh37 |
| SIPA1L2  | 0 | . | GRCh37 |
| SLAMF7   | 0 | . | GRCh37 |
| SLC10A4  | 0 | . | GRCh37 |
| SLC10A6  | 0 | . | GRCh37 |
| SLC12A7  | 0 | . | GRCh37 |
| SLC13A1  | 0 | . | GRCh37 |
| SLC16A2  | 0 | . | GRCh37 |
| SLC1A6   | 0 | . | GRCh37 |
| SLC1A6   | 0 | . | GRCh37 |
| SLC22A5  | 0 | . | GRCh37 |
| SLC23A1  | 0 | . | GRCh37 |
| SLC24A4  | 0 | . | GRCh37 |
| SLC25A13 | 0 | . | GRCh37 |
| SLC25A39 | 0 | . | GRCh37 |



VEP annotated somatic variants

|            |   |   |        |
|------------|---|---|--------|
| SLC25A39   | 0 | . | GRCh37 |
| SLC26A11   | 0 | . | GRCh37 |
| SLC28A1    | 0 | . | GRCh37 |
| SLC28A2    | 0 | . | GRCh37 |
| SLC2A8     | 0 | . | GRCh37 |
| SLC35B4    | 0 | . | GRCh37 |
| SLC35F1    | 0 | . | GRCh37 |
| SLC35F3    | 0 | . | GRCh37 |
| SLC37A2    | 0 | . | GRCh37 |
| SLC38A3    | 0 | . | GRCh37 |
| SLC38A7    | 0 | . | GRCh37 |
| SLC45A4    | 0 | . | GRCh37 |
| SLC4A2     | 0 | . | GRCh37 |
| SLC5A5     | 0 | . | GRCh37 |
| SLC6A14    | 0 | . | GRCh37 |
| SLC6A16    | 0 | . | GRCh37 |
| SLC6A4     | 0 | . | GRCh37 |
| SLC6A9     | 0 | . | GRCh37 |
| SLC7A8     | 0 | . | GRCh37 |
| SLC7A8     | 0 | . | GRCh37 |
| SLC9A7     | 0 | . | GRCh37 |
| SLCO2A1    | 0 | . | GRCh37 |
| SMARCA1    | 0 | . | GRCh37 |
| SMARCA5    | 0 | . | GRCh37 |
| SMC1B      | 0 | . | GRCh37 |
| SMOC1      | 0 | . | GRCh37 |
| SMTN       | 0 | . | GRCh37 |
| SMYD3      | 0 | . | GRCh37 |
| SORBS1     | 0 | . | GRCh37 |
| SORCS2     | 0 | . | GRCh37 |
| SPAG17     | 0 | . | GRCh37 |
| SPAG17     | 0 | . | GRCh37 |
| SPANXN2    | 0 | . | GRCh37 |
| SPATC1     | 0 | . | GRCh37 |
| SPEG       | 0 | . | GRCh37 |
| SPEG       | 0 | . | GRCh37 |
| SPINT2     | 0 | . | GRCh37 |
| SPOCK2     | 0 | . | GRCh37 |
| SPTBN5     | 0 | . | GRCh37 |
| SPTBN5     | 0 | . | GRCh37 |
| SRCAP      | 0 | . | GRCh37 |
| SSPO       | 0 | . | GRCh37 |
| SSPO       | 0 | . | GRCh37 |
| SSPO       | 0 | . | GRCh37 |
| SSUH2      | 0 | . | GRCh37 |
| ST3GAL2    | 0 | . | GRCh37 |
| ST6GALNAC2 | 0 | . | GRCh37 |
| ST6GALNAC2 | 0 | . | GRCh37 |
| ST6GALNAC4 | 0 | . | GRCh37 |
| STAB2      | 0 | . | GRCh37 |
| STAMPB     | 0 | . | GRCh37 |
| STAP1      | 0 | . | GRCh37 |
| STARD9     | 0 | . | GRCh37 |
| STAT4      | 0 | . | GRCh37 |
| STAT5B     | 0 | . | GRCh37 |

VEP annotated somatic variants

|          |   |   |        |
|----------|---|---|--------|
| STAU2    | 0 | . | GRCh37 |
| STOML1   | 0 | . | GRCh37 |
| STRA13   | 0 | . | GRCh37 |
| STRA8    | 0 | . | GRCh37 |
| STRBP    | 0 | . | GRCh37 |
| STRIP1   | 0 | . | GRCh37 |
| STRIP2   | 0 | . | GRCh37 |
| STXBP5   | 0 | . | GRCh37 |
| STYK1    | 0 | . | GRCh37 |
| STYXL1   | 0 | . | GRCh37 |
| SUCNR1   | 0 | . | GRCh37 |
| SUMO3    | 0 | . | GRCh37 |
| SUMO4    | 0 | . | GRCh37 |
| SUPT5H   | 0 | . | GRCh37 |
| SUPT5H   | 0 | . | GRCh37 |
| SUSD3    | 0 | . | GRCh37 |
| SWAP70   | 0 | . | GRCh37 |
| SYMPK    | 0 | . | GRCh37 |
| SYN2     | 0 | . | GRCh37 |
| SYNE2    | 0 | . | GRCh37 |
| SYNE2    | 0 | . | GRCh37 |
| SYNJ2    | 0 | . | GRCh37 |
| SYNM     | 0 | . | GRCh37 |
| SYNPO2   | 0 | . | GRCh37 |
| TAB2     | 0 | . | GRCh37 |
| TAB2     | 0 | . | GRCh37 |
| TACC3    | 0 | . | GRCh37 |
| TAF7L    | 0 | . | GRCh37 |
| TAGAP    | 0 | . | GRCh37 |
| TAGAP    | 0 | . | GRCh37 |
| TARSL2   | 0 | . | GRCh37 |
| TARSL2   | 0 | . | GRCh37 |
| TATDN2   | 0 | . | GRCh37 |
| TATDN2   | 0 | . | GRCh37 |
| TBC1D22A | 0 | . | GRCh37 |
| TBC1D4   | 0 | . | GRCh37 |
| TBC1D5   | 0 | . | GRCh37 |
| TBCK     | 0 | . | GRCh37 |
| TBX10    | 0 | . | GRCh37 |
| TCEAL2   | 0 | . | GRCh37 |
| TCEB3    | 0 | . | GRCh37 |
| TCERG1   | 0 | . | GRCh37 |
| TCN2     | 0 | . | GRCh37 |
| TDRD9    | 0 | . | GRCh37 |
| TENM1    | 0 | . | GRCh37 |
| TENM2    | 0 | . | GRCh37 |
| TERF2    | 0 | . | GRCh37 |
| TET3     | 0 | . | GRCh37 |
| TEX14    | 0 | . | GRCh37 |
| TEX2     | 0 | . | GRCh37 |
| TEX26    | 0 | . | GRCh37 |
| TFB1M    | 0 | . | GRCh37 |
| TFDP3    | 0 | . | GRCh37 |
| TFPT     | 0 | . | GRCh37 |
| TGFBR3   | 0 | . | GRCh37 |

VEP annotated somatic variants

|           |   |   |        |
|-----------|---|---|--------|
| TGIF2LX   | 0 | . | GRCh37 |
| TGM7      | 0 | . | GRCh37 |
| THBS2     | 0 | . | GRCh37 |
| THEG      | 0 | . | GRCh37 |
| THSD7A    | 0 | . | GRCh37 |
| THTPA     | 0 | . | GRCh37 |
| THUMP2    | 0 | . | GRCh37 |
| TIAM1     | 0 | . | GRCh37 |
| TIAM2     | 0 | . | GRCh37 |
| TICAM1    | 0 | . | GRCh37 |
| TIMM21    | 0 | . | GRCh37 |
| TKT       | 0 | . | GRCh37 |
| TKT       | 0 | . | GRCh37 |
| TLCD1     | 0 | . | GRCh37 |
| TLE3      | 0 | . | GRCh37 |
| TLE3      | 0 | . | GRCh37 |
| TLK2      | 0 | . | GRCh37 |
| TLL1      | 0 | . | GRCh37 |
| TLL2      | 0 | . | GRCh37 |
| TLL2      | 0 | . | GRCh37 |
| TLL2      | 0 | . | GRCh37 |
| TLN2      | 0 | . | GRCh37 |
| TLX2      | 0 | . | GRCh37 |
| TMED6     | 0 | . | GRCh37 |
| TMEM131   | 0 | . | GRCh37 |
| TMEM140   | 0 | . | GRCh37 |
| TMEM150C  | 0 | . | GRCh37 |
| TMEM185A  | 0 | . | GRCh37 |
| TMEM216   | 0 | . | GRCh37 |
| TMEM220   | 0 | . | GRCh37 |
| TMPRSS11A | 0 | . | GRCh37 |
| TNFAIP3   | 0 | . | GRCh37 |
| TNFSF8    | 0 | . | GRCh37 |
| TNRC18    | 0 | . | GRCh37 |
| TNS4      | 0 | . | GRCh37 |
| TNS4      | 0 | . | GRCh37 |
| TP53BP1   | 0 | . | GRCh37 |
| TP53BP1   | 0 | . | GRCh37 |
| TP53BP1   | 0 | . | GRCh37 |
| TPGS2     | 0 | . | GRCh37 |
| TPM4      | 0 | . | GRCh37 |
| TPPP      | 0 | . | GRCh37 |
| TPPP      | 0 | . | GRCh37 |
| TPRG1     | 0 | . | GRCh37 |
| TRAPPC6A  | 0 | . | GRCh37 |
| TRAPPC6B  | 0 | . | GRCh37 |
| TRAPPC6B  | 0 | . | GRCh37 |
| TRERF1    | 0 | . | GRCh37 |
| TREX2     | 0 | . | GRCh37 |
| TRIM15    | 0 | . | GRCh37 |
| TRIM27    | 0 | . | GRCh37 |
| TRIM46    | 0 | . | GRCh37 |
| TRIM62    | 0 | . | GRCh37 |
| TRIM67    | 0 | . | GRCh37 |
| TRIM9     | 0 | . | GRCh37 |

VEP annotated somatic variants

|         |   |   |        |
|---------|---|---|--------|
| TRIM9   | 0 | . | GRCh37 |
| TRIO    | 0 | . | GRCh37 |
| TRIP6   | 0 | . | GRCh37 |
| TRMT1   | 0 | . | GRCh37 |
| TRMT2B  | 0 | . | GRCh37 |
| TRPC4AP | 0 | . | GRCh37 |
| TRPM1   | 0 | . | GRCh37 |
| TRPM5   | 0 | . | GRCh37 |
| TRPM7   | 0 | . | GRCh37 |
| TRPV4   | 0 | . | GRCh37 |
| TSC1    | 0 | . | GRCh37 |
| TSC1    | 0 | . | GRCh37 |
| TSC2    | 0 | . | GRCh37 |
| TSPAN1  | 0 | . | GRCh37 |
| TSPAN6  | 0 | . | GRCh37 |
| TSPAN7  | 0 | . | GRCh37 |
| TSSK2   | 0 | . | GRCh37 |
| TTBK1   | 0 | . | GRCh37 |
| TTBK1   | 0 | . | GRCh37 |
| TTC18   | 0 | . | GRCh37 |
| TTC19   | 0 | . | GRCh37 |
| TTC28   | 0 | . | GRCh37 |
| TTC40   | 0 | . | GRCh37 |
| TTC40   | 0 | . | GRCh37 |
| TTC40   | 0 | . | GRCh37 |
| TTC40   | 0 | . | GRCh37 |
| TTC40   | 0 | . | GRCh37 |
| TTC40   | 0 | . | GRCh37 |
| TLL1    | 0 | . | GRCh37 |
| TLL6    | 0 | . | GRCh37 |
| TUB     | 0 | . | GRCh37 |
| TUBGCP5 | 0 | . | GRCh37 |
| TUBGCP6 | 0 | . | GRCh37 |
| TULP4   | 0 | . | GRCh37 |
| TULP4   | 0 | . | GRCh37 |
| TWF1    | 0 | . | GRCh37 |
| TYMP    | 0 | . | GRCh37 |
| UBASH3A | 0 | . | GRCh37 |
| UBASH3B | 0 | . | GRCh37 |
| UBE3C   | 0 | . | GRCh37 |
| UBR4    | 0 | . | GRCh37 |
| UBXN2B  | 0 | . | GRCh37 |
| UCP3    | 0 | . | GRCh37 |
| UHRF1   | 0 | . | GRCh37 |
| UHRF2   | 0 | . | GRCh37 |
| ULK4    | 0 | . | GRCh37 |
| UMODL1  | 0 | . | GRCh37 |
| UMODL1  | 0 | . | GRCh37 |
| UMODL1  | 0 | . | GRCh37 |
| UNC45B  | 0 | . | GRCh37 |
| UNKL    | 0 | . | GRCh37 |
| Unknown | 0 | . | GRCh37 |
| UPB1    | 0 | . | GRCh37 |
| UPRT    | 0 | . | GRCh37 |
| USH2A   | 0 | . | GRCh37 |
| USHBP1  | 0 | . | GRCh37 |

VEP annotated somatic variants

|         |   |   |        |
|---------|---|---|--------|
| USP10   | 0 | . | GRCh37 |
| USP11   | 0 | . | GRCh37 |
| USP18   | 0 | . | GRCh37 |
| USP20   | 0 | . | GRCh37 |
| USP22   | 0 | . | GRCh37 |
| USP34   | 0 | . | GRCh37 |
| UTP15   | 0 | . | GRCh37 |
| UTP20   | 0 | . | GRCh37 |
| UTP20   | 0 | . | GRCh37 |
| UTY     | 0 | . | GRCh37 |
| VIM     | 0 | . | GRCh37 |
| VIPR2   | 0 | . | GRCh37 |
| VRK2    | 0 | . | GRCh37 |
| VTI1B   | 0 | . | GRCh37 |
| WBSCR22 | 0 | . | GRCh37 |
| WBSCR22 | 0 | . | GRCh37 |
| WBSCR27 | 0 | . | GRCh37 |
| WDFY4   | 0 | . | GRCh37 |
| WDR11   | 0 | . | GRCh37 |
| WDR11   | 0 | . | GRCh37 |
| WDR11   | 0 | . | GRCh37 |
| WDR11   | 0 | . | GRCh37 |
| WDR11   | 0 | . | GRCh37 |
| WDR17   | 0 | . | GRCh37 |
| WDR26   | 0 | . | GRCh37 |
| WDR43   | 0 | . | GRCh37 |
| WDR48   | 0 | . | GRCh37 |
| WDR60   | 0 | . | GRCh37 |
| WDR87   | 0 | . | GRCh37 |
| WDR91   | 0 | . | GRCh37 |
| WIPI2   | 0 | . | GRCh37 |
| WNK1    | 0 | . | GRCh37 |
| WNT2B   | 0 | . | GRCh37 |
| WNT8B   | 0 | . | GRCh37 |
| WRNIP1  | 0 | . | GRCh37 |
| WSB2    | 0 | . | GRCh37 |
| WWC1    | 0 | . | GRCh37 |
| WWP2    | 0 | . | GRCh37 |
| XAB2    | 0 | . | GRCh37 |
| XKR8    | 0 | . | GRCh37 |
| XPNPEP1 | 0 | . | GRCh37 |
| XPNPEP3 | 0 | . | GRCh37 |
| XPO5    | 0 | . | GRCh37 |
| XRCC1   | 0 | . | GRCh37 |
| XRCC1   | 0 | . | GRCh37 |
| YBX2    | 0 | . | GRCh37 |
| YY1AP1  | 0 | . | GRCh37 |
| YY1AP1  | 0 | . | GRCh37 |
| ZBTB2   | 0 | . | GRCh37 |
| ZC2HC1B | 0 | . | GRCh37 |
| ZC3H12D | 0 | . | GRCh37 |
| ZC3H12D | 0 | . | GRCh37 |
| ZC3H12D | 0 | . | GRCh37 |
| ZC3H3   | 0 | . | GRCh37 |
| ZC3H7B  | 0 | . | GRCh37 |

VEP annotated somatic variants

|         |   |   |        |
|---------|---|---|--------|
| ZCCHC18 | 0 | . | GRCh37 |
| ZDHHC16 | 0 | . | GRCh37 |
| ZDHHC6  | 0 | . | GRCh37 |
| ZDHHC7  | 0 | . | GRCh37 |
| ZFAND2A | 0 | . | GRCh37 |
| ZFHX2   | 0 | . | GRCh37 |
| ZFPM2   | 0 | . | GRCh37 |
| ZFYVE19 | 0 | . | GRCh37 |
| ZKSCAN5 | 0 | . | GRCh37 |
| ZMYND10 | 0 | . | GRCh37 |
| ZMYND10 | 0 | . | GRCh37 |
| ZNF185  | 0 | . | GRCh37 |
| ZNF275  | 0 | . | GRCh37 |
| ZNF304  | 0 | . | GRCh37 |
| ZNF324  | 0 | . | GRCh37 |
| ZNF365  | 0 | . | GRCh37 |
| ZNF414  | 0 | . | GRCh37 |
| ZNF420  | 0 | . | GRCh37 |
| ZNF432  | 0 | . | GRCh37 |
| ZNF441  | 0 | . | GRCh37 |
| ZNF449  | 0 | . | GRCh37 |
| ZNF493  | 0 | . | GRCh37 |
| ZNF512B | 0 | . | GRCh37 |
| ZNF592  | 0 | . | GRCh37 |
| ZNF598  | 0 | . | GRCh37 |
| ZNF614  | 0 | . | GRCh37 |
| ZNF626  | 0 | . | GRCh37 |
| ZNF676  | 0 | . | GRCh37 |
| ZNF697  | 0 | . | GRCh37 |
| ZNF708  | 0 | . | GRCh37 |
| ZNF717  | 0 | . | GRCh37 |
| ZNF75D  | 0 | . | GRCh37 |
| ZNF785  | 0 | . | GRCh37 |
| ZNF816  | 0 | . | GRCh37 |
| ZNF839  | 0 | . | GRCh37 |
| ZP1     | 0 | . | GRCh37 |
| ZSCAN2  | 0 | . | GRCh37 |
| ZSWIM4  | 0 | . | GRCh37 |
| ZZEF1   | 0 | . | GRCh37 |

VEP annotated somatic variants

| Chromosome | Start_Position | End_Position | Strand |
|------------|----------------|--------------|--------|
| 3          | 151458754      | 151458755    | +      |
| 9          | 99408152       | 99408152     | +      |
| 7          | 121758290      | 121758290    | +      |
| 17         | 67212031       | 67212031     | +      |
| 16         | 2326640        | 2326640      | +      |
| 17         | 67133352       | 67133352     | +      |
| 17         | 67099129       | 67099129     | +      |
| 17         | 67023755       | 67023755     | +      |
| 16         | 16228278       | 16228278     | +      |
| 16         | 16278976       | 16278976     | +      |
| 11         | 17419279       | 17419279     | +      |
| 18         | 19284677       | 19284678     | +      |
| 17         | 912914         | 912914       | +      |
| 7          | 28996944       | 28996944     | +      |
| 3          | 5229643        | 5229643      | +      |
| 11         | 134132364      | 134132364    | +      |
| 1          | 76190569       | 76190569     | +      |
| 10         | 124813127      | 124813127    | +      |
| 1          | 226334605      | 226334605    | +      |
| 19         | 6333604        | 6333604      | +      |
| 11         | 47266762       | 47266762     | +      |
| 3          | 140998214      | 140998214    | +      |
| 15         | 78473309       | 78473309     | +      |
| 16         | 89167828       | 89167828     | +      |
| 12         | 7457217        | 7457217      | +      |
| 3          | 38520767       | 38520767     | +      |
| 1          | 155033918      | 155033918    | +      |
| 2          | 9650350        | 9650351      | +      |
| 10         | 72513635       | 72513635     | +      |
| 5          | 178557142      | 178557142    | +      |
| 12         | 43887065       | 43887065     | +      |
| 1          | 161163633      | 161163633    | +      |
| 5          | 64625166       | 64625166     | +      |
| 9          | 18753529       | 18753529     | +      |
| 1          | 203119929      | 203119943    | +      |
| 1          | 112046197      | 112046197    | +      |
| 10         | 116073801      | 116073801    | +      |
| 4          | 88052219       | 88052219     | +      |
| X          | 147967544      | 147967544    | +      |
| 7          | 150814340      | 150814341    | +      |
| 7          | 134673958      | 134673958    | +      |
| 3          | 148459395      | 148459395    | +      |
| 6          | 135749682      | 135749682    | +      |
| 16         | 31539386       | 31539386     | +      |
| 6          | 143382110      | 143382110    | +      |
| 1          | 26662774       | 26662774     | +      |
| 1          | 26662904       | 26662904     | +      |
| 17         | 6331817        | 6331817      | +      |
| 21         | 45708277       | 45708277     | +      |
| 21         | 45710107       | 45710107     | +      |
| 7          | 91707197       | 91707197     | +      |
| 7          | 91659150       | 91659150     | +      |
| 7          | 134225788      | 134225788    | +      |
| 4          | 74279398       | 74279398     | +      |

VEP annotated somatic variants

|    |           |           |   |
|----|-----------|-----------|---|
| 19 | 49962892  | 49962892  | + |
| 15 | 101448571 | 101448571 | + |
| 10 | 45938746  | 45938746  | + |
| 15 | 85360004  | 85360004  | + |
| 15 | 85403340  | 85403340  | + |
| 11 | 118071097 | 118071097 | + |
| 11 | 118074117 | 118074117 | + |
| 2  | 112552427 | 112552427 | + |
| 8  | 41585384  | 41585384  | + |
| 2  | 190593169 | 190593173 | + |
| 11 | 113264521 | 113264521 | + |
| 12 | 133304126 | 133304126 | + |
| 9  | 33572347  | 33572347  | + |
| 10 | 27326999  | 27326999  | + |
| 3  | 15727823  | 15727823  | + |
| 1  | 145561116 | 145561116 | + |
| 12 | 56648777  | 56648777  | + |
| 5  | 55455600  | 55455600  | + |
| 2  | 201501857 | 201501857 | + |
| 11 | 112131049 | 112131049 | + |
| 22 | 29737823  | 29737823  | + |
| 19 | 50303459  | 50303459  | + |
| 15 | 51222966  | 51222966  | + |
| 15 | 51233761  | 51233761  | + |
| 10 | 26781157  | 26781157  | + |
| X  | 84322103  | 84322103  | + |
| 2  | 241631413 | 241631413 | + |
| 2  | 241631267 | 241631267 | + |
| 18 | 24442056  | 24442056  | + |
| 5  | 115338958 | 115338958 | + |
| 12 | 49334639  | 49334640  | + |
| 4  | 148984321 | 148984321 | + |
| 10 | 99024572  | 99024572  | + |
| X  | 130219723 | 130219723 | + |
| X  | 153176284 | 153176284 | + |
| 1  | 156929023 | 156929023 | + |
| 1  | 3383665   | 3383665   | + |
| 1  | 155948438 | 155948438 | + |
| 3  | 56771251  | 56771251  | + |
| 13 | 111870037 | 111870037 | + |
| 9  | 34623338  | 34623338  | + |
| 10 | 18964097  | 18964097  | + |
| 3  | 137958438 | 137958438 | + |
| X  | 100743037 | 100743037 | + |
| X  | 100743826 | 100743826 | + |
| X  | 100742551 | 100742551 | + |
| X  | 100749585 | 100749585 | + |
| 17 | 4622551   | 4622551   | + |
| 19 | 18119678  | 18119678  | + |
| 19 | 18119399  | 18119399  | + |
| 22 | 51065361  | 51065361  | + |
| 22 | 19965428  | 19965428  | + |
| 7  | 150883761 | 150883761 | + |
| 3  | 57314594  | 57314594  | + |
| 7  | 95115500  | 95115500  | + |



VEP annotated somatic variants

|    |           |           |   |
|----|-----------|-----------|---|
| 9  | 132404347 | 132404347 | + |
| 2  | 220380125 | 220380125 | + |
| 17 | 79972901  | 79972901  | + |
| 2  | 96798510  | 96798510  | + |
| 2  | 96795944  | 96795944  | + |
| 9  | 119449230 | 119449230 | + |
| 18 | 31263320  | 31263320  | + |
| 7  | 117008580 | 117008580 | + |
| 1  | 63269580  | 63269580  | + |
| 14 | 51062270  | 51062270  | + |
| 13 | 113536467 | 113536467 | + |
| 1  | 17326540  | 17326540  | + |
| 1  | 160105367 | 160105367 | + |
| 1  | 160156027 | 160156027 | + |
| 16 | 84459424  | 84459424  | + |
| 10 | 7849054   | 7849054   | + |
| X  | 77276413  | 77276413  | + |
| 18 | 55399089  | 55399089  | + |
| 20 | 50273749  | 50273749  | + |
| 20 | 50225206  | 50225206  | + |
| 3  | 48505302  | 48505302  | + |
| 16 | 28845584  | 28845584  | + |
| X  | 69459945  | 69459945  | + |
| X  | 69261818  | 69261818  | + |
| 1  | 179414105 | 179414105 | + |
| 16 | 338332    | 338333    | + |
| 19 | 17922795  | 17922795  | + |
| 17 | 79060180  | 79060180  | + |
| 16 | 1393575   | 1393575   | + |
| 4  | 123664204 | 123664204 | + |
| 19 | 41903699  | 41903699  | + |
| 7  | 72966638  | 72966638  | + |
| X  | 129186012 | 129186012 | + |
| 11 | 61724787  | 61724787  | + |
| 12 | 32491915  | 32491915  | + |
| 10 | 97987378  | 97987378  | + |
| X  | 50654091  | 50654091  | + |
| 15 | 83951807  | 83951807  | + |
| 20 | 31609246  | 31609246  | + |
| 17 | 65936805  | 65936805  | + |
| 17 | 41215825  | 41215825  | + |
| 17 | 41219560  | 41219560  | + |
| 17 | 41226601  | 41226601  | + |
| 13 | 32903685  | 32903685  | + |
| 5  | 870740    | 870740    | + |
| 21 | 40652142  | 40652142  | + |
| 1  | 32832292  | 32832292  | + |
| 19 | 577760    | 577760    | + |
| 19 | 580575    | 580575    | + |
| 10 | 124097427 | 124097427 | + |
| 10 | 124089075 | 124089075 | + |
| 1  | 92568304  | 92568304  | + |
| 12 | 92539105  | 92539105  | + |
| 5  | 180486247 | 180486247 | + |
| 17 | 56384374  | 56384374  | + |

VEP annotated somatic variants

|    |           |           |   |
|----|-----------|-----------|---|
| 10 | 73483954  | 73483955  | + |
| 10 | 50534862  | 50534862  | + |
| 10 | 128153623 | 128153623 | + |
| 11 | 47182926  | 47182926  | + |
| 12 | 117160976 | 117160976 | + |
| 12 | 96927817  | 96927817  | + |
| 12 | 14976418  | 14976419  | + |
| 14 | 23729976  | 23729979  | + |
| 17 | 4806428   | 4806428   | + |
| 17 | 42239349  | 42239349  | + |
| 19 | 1231142   | 1231142   | + |
| 19 | 38794895  | 38794895  | + |
| X  | 119760629 | 119760629 | + |
| 1  | 244735858 | 244735858 | + |
| 1  | 67569129  | 67569132  | + |
| 1  | 57216949  | 57216949  | + |
| 1  | 75086412  | 75086412  | + |
| 17 | 77043574  | 77043574  | + |
| 2  | 241826477 | 241826477 | + |
| 2  | 74643451  | 74643451  | + |
| 19 | 6697829   | 6697829   | + |
| 4  | 128905672 | 128905672 | + |
| 9  | 123744252 | 123744252 | + |
| 9  | 123737040 | 123737040 | + |
| 6  | 4079875   | 4079875   | + |
| 5  | 40937863  | 40937863  | + |
| 17 | 49711045  | 49711045  | + |
| 16 | 87925534  | 87925534  | + |
| 22 | 24466964  | 24466964  | + |
| 19 | 13323642  | 13323647  | + |
| 9  | 140881314 | 140881314 | + |
| 12 | 2702590   | 2702590   | + |
| 3  | 50416785  | 50416785  | + |
| 3  | 50402309  | 50402309  | + |
| 10 | 18787195  | 18787195  | + |
| 6  | 7329987   | 7329987   | + |
| 7  | 134635040 | 134635040 | + |
| 19 | 13049423  | 13049423  | + |
| 10 | 12870927  | 12870927  | + |
| 4  | 114458402 | 114458402 | + |
| 2  | 44931520  | 44931520  | + |
| 19 | 7675369   | 7675369   | + |
| 6  | 44144798  | 44144798  | + |
| 1  | 230891248 | 230891248 | + |
| 19 | 5914938   | 5914938   | + |
| 22 | 37902177  | 37902177  | + |
| 19 | 48734018  | 48734018  | + |
| 19 | 15166997  | 15166997  | + |
| 1  | 160163449 | 160163449 | + |
| 1  | 10704876  | 10704876  | + |
| 19 | 38848861  | 38848861  | + |
| 3  | 8775589   | 8775589   | + |
| 16 | 57550331  | 57550331  | + |
| 2  | 55764755  | 55764764  | + |
| 19 | 15131330  | 15131330  | + |

VEP annotated somatic variants

|    |           |           |   |
|----|-----------|-----------|---|
| 18 | 47777358  | 47777358  | + |
| X  | 48926261  | 48926261  | + |
| 7  | 92987771  | 92987771  | + |
| 17 | 79637548  | 79637548  | + |
| 10 | 106124620 | 106124620 | + |
| 4  | 77278676  | 77278676  | + |
| 13 | 36788758  | 36788758  | + |
| 1  | 93712532  | 93712532  | + |
| 17 | 80159665  | 80159665  | + |
| 10 | 61665842  | 61665842  | + |
| 11 | 86098732  | 86098732  | + |
| 9  | 34690400  | 34690400  | + |
| 3  | 46400062  | 46400062  | + |
| 6  | 74497009  | 74497009  | + |
| 3  | 112545911 | 112545911 | + |
| 1  | 160803802 | 160803802 | + |
| 17 | 72478031  | 72478031  | + |
| 19 | 45912002  | 45912002  | + |
| 1  | 207934849 | 207934849 | + |
| 17 | 80274142  | 80274168  | + |
| 5  | 137549089 | 137549089 | + |
| 11 | 64602757  | 64602757  | + |
| 22 | 19506456  | 19506456  | + |
| 3  | 45134822  | 45134822  | + |
| 5  | 19747396  | 19747396  | + |
| 6  | 110942653 | 110942653 | + |
| 17 | 73997639  | 73997639  | + |
| 5  | 68557958  | 68557958  | + |
| 6  | 21065450  | 21065450  | + |
| X  | 18668769  | 18668769  | + |
| 20 | 5107809   | 5107809   | + |
| 6  | 31085340  | 31085340  | + |
| 6  | 31088202  | 31088202  | + |
| 19 | 42083495  | 42083495  | + |
| 19 | 42311060  | 42311061  | + |
| 22 | 17669151  | 17669151  | + |
| 22 | 18018604  | 18018604  | + |
| 22 | 17990852  | 17990852  | + |
| 22 | 17619378  | 17619378  | + |
| 22 | 17601466  | 17601466  | + |
| X  | 100375371 | 100375371 | + |
| 6  | 126661502 | 126661502 | + |
| 20 | 34060062  | 34060062  | + |
| 20 | 34082583  | 34082583  | + |
| 3  | 134214042 | 134214042 | + |
| 3  | 134226159 | 134226159 | + |
| 3  | 138289221 | 138289221 | + |
| 17 | 62517456  | 62517456  | + |
| 9  | 131191403 | 131191403 | + |
| 16 | 66976249  | 66976249  | + |
| 1  | 196659237 | 196659237 | + |
| 7  | 117307108 | 117307108 | + |
| 19 | 49558667  | 49558667  | + |
| 1  | 146714392 | 146714392 | + |
| 12 | 133448815 | 133448815 | + |

VEP annotated somatic variants

|    |           |           |   |
|----|-----------|-----------|---|
| 12 | 133447242 | 133447242 | + |
| 1  | 111778325 | 111778325 | + |
| 17 | 7360110   | 7360110   | + |
| 15 | 40764549  | 40764549  | + |
| 16 | 11004150  | 11004150  | + |
| 14 | 102814945 | 102814945 | + |
| 12 | 120135717 | 120135717 | + |
| X  | 71521867  | 71521867  | + |
| 5  | 80561943  | 80561943  | + |
| 1  | 11893715  | 11893715  | + |
| 1  | 16355877  | 16355877  | + |
| 7  | 100875598 | 100875598 | + |
| 12 | 8693418   | 8693418   | + |
| X  | 154507173 | 154507173 | + |
| 1  | 25153500  | 25153500  | + |
| 12 | 122839909 | 122839909 | + |
| 2  | 29383374  | 29383374  | + |
| X  | 21619305  | 21619305  | + |
| 10 | 101137063 | 101137063 | + |
| 16 | 58575489  | 58575489  | + |
| 2  | 101883046 | 101883046 | + |
| 6  | 88853635  | 88853635  | + |
| 3  | 3030223   | 3030223   | + |
| 7  | 147926888 | 147926888 | + |
| 7  | 147926734 | 147926734 | + |
| 9  | 123929686 | 123929686 | + |
| 7  | 51093049  | 51093049  | + |
| 16 | 70530359  | 70530359  | + |
| 7  | 106965009 | 106965009 | + |
| 10 | 105796465 | 105796466 | + |
| 5  | 177686815 | 177686815 | + |
| 1  | 86435850  | 86435850  | + |
| 1  | 86482958  | 86482958  | + |
| 7  | 101200727 | 101200727 | + |
| X  | 107420287 | 107420287 | + |
| 19 | 10080194  | 10080194  | + |
| 21 | 47417303  | 47417303  | + |
| 2  | 238289490 | 238289492 | + |
| 22 | 19951207  | 19951207  | + |
| 1  | 245005373 | 245005373 | + |
| 3  | 148902954 | 148902954 | + |
| 15 | 83240441  | 83240441  | + |
| 5  | 173383194 | 173383194 | + |
| 1  | 207653364 | 207653364 | + |
| 9  | 126131161 | 126131161 | + |
| 7  | 30706799  | 30706799  | + |
| 2  | 36624021  | 36624021  | + |
| 2  | 36669670  | 36669670  | + |
| 6  | 49696473  | 49696473  | + |
| 20 | 20019154  | 20019155  | + |
| 15 | 91162945  | 91162945  | + |
| 3  | 97611916  | 97611916  | + |
| 3  | 97541018  | 97541018  | + |
| X  | 151904488 | 151904488 | + |
| 20 | 472855    | 472855    | + |

VEP annotated somatic variants

|    |           |           |   |
|----|-----------|-----------|---|
| 15 | 75977920  | 75977920  | + |
| 20 | 56099305  | 56099305  | + |
| 16 | 11540760  | 11540760  | + |
| 10 | 69366602  | 69366602  | + |
| 9  | 111755008 | 111755008 | + |
| 10 | 17130199  | 17130199  | + |
| 10 | 35362977  | 35362977  | + |
| 6  | 43006408  | 43006408  | + |
| 7  | 101559302 | 101559302 | + |
| 7  | 101845476 | 101845476 | + |
| 2  | 180815528 | 180815528 | + |
| 2  | 180810180 | 180810180 | + |
| 11 | 107299631 | 107299631 | + |
| X  | 70837517  | 70837517  | + |
| 11 | 61118437  | 61118437  | + |
| 11 | 7691019   | 7691019   | + |
| 19 | 41601609  | 41601609  | + |
| 19 | 41600800  | 41600800  | + |
| 7  | 99364703  | 99364704  | + |
| 19 | 15784377  | 15784377  | + |
| 7  | 91758422  | 91758422  | + |
| 11 | 61487690  | 61487690  | + |
| 2  | 136740900 | 136740900 | + |
| 3  | 137882752 | 137882752 | + |
| 19 | 14065534  | 14065534  | + |
| 19 | 14065341  | 14065341  | + |
| 19 | 14065074  | 14065074  | + |
| 18 | 50832102  | 50832102  | + |
| 6  | 24205236  | 24205236  | + |
| 4  | 155412587 | 155412587 | + |
| 4  | 183815688 | 183815688 | + |
| 12 | 31246086  | 31246086  | + |
| 12 | 31242725  | 31242725  | + |
| 1  | 200617533 | 200617533 | + |
| 9  | 126202551 | 126202551 | + |
| 11 | 9225486   | 9225486   | + |
| 5  | 59995820  | 59995820  | + |
| 22 | 19050635  | 19050635  | + |
| 7  | 14737676  | 14737676  | + |
| 1  | 12639018  | 12639018  | + |
| 10 | 127529756 | 127529757 | + |
| 12 | 125465023 | 125465023 | + |
| 17 | 41603882  | 41603882  | + |
| 17 | 41582284  | 41582284  | + |
| 17 | 41599383  | 41599383  | + |
| 5  | 140956464 | 140956464 | + |
| 12 | 51093032  | 51093032  | + |
| 15 | 66625725  | 66625728  | + |
| 1  | 232002392 | 232002392 | + |
| 1  | 231954872 | 231954872 | + |
| 8  | 42233448  | 42233448  | + |
| 11 | 83497637  | 83497637  | + |
| X  | 69668463  | 69668463  | + |
| 10 | 79571843  | 79571843  | + |
| 6  | 43422698  | 43422698  | + |

VEP annotated somatic variants

|    |           |           |   |
|----|-----------|-----------|---|
| 19 | 35993661  | 35993661  | + |
| 10 | 70190155  | 70190155  | + |
| 7  | 21827297  | 21827297  | + |
| 3  | 57422824  | 57422824  | + |
| 1  | 225492845 | 225492845 | + |
| 1  | 225477793 | 225477793 | + |
| 1  | 225492545 | 225492545 | + |
| 1  | 225541666 | 225541666 | + |
| 1  | 225519116 | 225519116 | + |
| 17 | 76569056  | 76569056  | + |
| 6  | 38796135  | 38796135  | + |
| 17 | 11837161  | 11837161  | + |
| 1  | 38025103  | 38025103  | + |
| 1  | 84876501  | 84876501  | + |
| 10 | 101639546 | 101639546 | + |
| 5  | 169472765 | 169472765 | + |
| 3  | 51393457  | 51393457  | + |
| 19 | 2223327   | 2223327   | + |
| 16 | 89704365  | 89704365  | + |
| 19 | 38708398  | 38708398  | + |
| 1  | 101458396 | 101458396 | + |
| 12 | 63974439  | 63974439  | + |
| 1  | 11772491  | 11772491  | + |
| X  | 100511098 | 100511098 | + |
| X  | 100505617 | 100505617 | + |
| X  | 100514986 | 100514986 | + |
| 11 | 117375596 | 117375596 | + |
| 18 | 29036519  | 29036522  | + |
| 18 | 28993501  | 28993501  | + |
| 18 | 28956904  | 28956904  | + |
| 6  | 7556063   | 7556063   | + |
| 6  | 56496904  | 56496904  | + |
| 14 | 31922408  | 31922408  | + |
| 6  | 15652266  | 15652266  | + |
| 5  | 118280395 | 118280395 | + |
| 7  | 76111835  | 76111835  | + |
| 22 | 31060029  | 31060029  | + |
| 12 | 89744773  | 89744773  | + |
| 7  | 95616330  | 95616330  | + |
| 11 | 103192039 | 103192039 | + |
| 1  | 43638185  | 43638185  | + |
| X  | 48382236  | 48382236  | + |
| 1  | 21573855  | 21573855  | + |
| 2  | 233347919 | 233347919 | + |
| 3  | 172486964 | 172486964 | + |
| 6  | 139134558 | 139134558 | + |
| 1  | 184706920 | 184706920 | + |
| 6  | 12292772  | 12292772  | + |
| 13 | 78477256  | 78477256  | + |
| 12 | 93202726  | 93202726  | + |
| 20 | 62127121  | 62127121  | + |
| 6  | 8102361   | 8102362   | + |
| 17 | 45447734  | 45447734  | + |
| 17 | 60464839  | 60464842  | + |
| 12 | 3768705   | 3768705   | + |

VEP annotated somatic variants

|    |           |           |   |
|----|-----------|-----------|---|
| 3  | 19975139  | 19975139  | + |
| 15 | 82545188  | 82545188  | + |
| 17 | 42945296  | 42945296  | + |
| X  | 24073761  | 24073761  | + |
| X  | 129201179 | 129201179 | + |
| 22 | 37771158  | 37771158  | + |
| 22 | 37770066  | 37770066  | + |
| 22 | 37770357  | 37770357  | + |
| 7  | 73469169  | 73469169  | + |
| 6  | 10990074  | 10990074  | + |
| 1  | 19565344  | 19565344  | + |
| 8  | 109491399 | 109491399 | + |
| 8  | 109488937 | 109488937 | + |
| 14 | 100380948 | 100380948 | + |
| 14 | 100363671 | 100363671 | + |
| 14 | 100363672 | 100363672 | + |
| 2  | 119604255 | 119604255 | + |
| 9  | 130578404 | 130578404 | + |
| 13 | 43985992  | 43985992  | + |
| 10 | 97582968  | 97582968  | + |
| 14 | 74426375  | 74426375  | + |
| 12 | 132464406 | 132464406 | + |
| 7  | 142564854 | 142564854 | + |
| 1  | 226026406 | 226026406 | + |
| 8  | 27394366  | 27394366  | + |
| 17 | 62144344  | 62144344  | + |
| 12 | 53671549  | 53671549  | + |
| 3  | 138191232 | 138191232 | + |
| 15 | 76578762  | 76578762  | + |
| 19 | 51850290  | 51850290  | + |
| 19 | 44031324  | 44031324  | + |
| 1  | 93101670  | 93101670  | + |
| 19 | 7912816   | 7912816   | + |
| 19 | 7917919   | 7917919   | + |
| 17 | 74015819  | 74015819  | + |
| 17 | 74006136  | 74006136  | + |
| 14 | 69695888  | 69695888  | + |
| 1  | 242042301 | 242042301 | + |
| 4  | 56770438  | 56770438  | + |
| 6  | 159210283 | 159210283 | + |
| X  | 154158285 | 154158285 | + |
| X  | 154194989 | 154194989 | + |
| X  | 138643964 | 138643964 | + |
| X  | 57318907  | 57318907  | + |
| 11 | 61615803  | 61615803  | + |
| 11 | 61645967  | 61645967  | + |
| 15 | 80452886  | 80452886  | + |
| 22 | 45728370  | 45728370  | + |
| X  | 133955848 | 133955849 | + |
| X  | 133955849 | 133955850 | + |
| X  | 134156121 | 134156121 | + |
| X  | 134155904 | 134155904 | + |
| 8  | 139277934 | 139277934 | + |
| 6  | 117083182 | 117083182 | + |
| 11 | 73179426  | 73179426  | + |

VEP annotated somatic variants

|    |           |           |   |
|----|-----------|-----------|---|
| 11 | 82443417  | 82443417  | + |
| 4  | 17649233  | 17649233  | + |
| 12 | 50724267  | 50724267  | + |
| 19 | 35719644  | 35719644  | + |
| 1  | 155224091 | 155224091 | + |
| 10 | 46222724  | 46222724  | + |
| 1  | 150974162 | 150974162 | + |
| 6  | 24818785  | 24818785  | + |
| 5  | 94756010  | 94756010  | + |
| 16 | 89865650  | 89865650  | + |
| 6  | 35423489  | 35423489  | + |
| 6  | 35424188  | 35424188  | + |
| 6  | 35423662  | 35423662  | + |
| 12 | 29486745  | 29486745  | + |
| 2  | 242374358 | 242374358 | + |
| 2  | 242405021 | 242405021 | + |
| 17 | 80044211  | 80044211  | + |
| 17 | 80044078  | 80044078  | + |
| 17 | 80045147  | 80045147  | + |
| 17 | 80059487  | 80059487  | + |
| 3  | 13612319  | 13612319  | + |
| 19 | 8159339   | 8159339   | + |
| 12 | 133102462 | 133102462 | + |
| 5  | 135276814 | 135276814 | + |
| 9  | 37512734  | 37512734  | + |
| 9  | 37529344  | 37529344  | + |
| 19 | 39437014  | 39437014  | + |
| 3  | 48419723  | 48419723  | + |
| 10 | 103432635 | 103432635 | + |
| 1  | 207135991 | 207135991 | + |
| 19 | 17886940  | 17886940  | + |
| 5  | 176520243 | 176520243 | + |
| 4  | 155525970 | 155525970 | + |
| 18 | 34232952  | 34232952  | + |
| 18 | 34310668  | 34310668  | + |
| 18 | 34233231  | 34233231  | + |
| 2  | 164468328 | 164468328 | + |
| 4  | 54280963  | 54280964  | + |
| 7  | 72754645  | 72754645  | + |
| 2  | 179341953 | 179341953 | + |
| X  | 153594535 | 153594535 | + |
| 3  | 58092346  | 58092346  | + |
| 5  | 180045700 | 180045701 | + |
| 1  | 240497598 | 240497598 | + |
| 1  | 240492543 | 240492543 | + |
| 1  | 171076935 | 171076935 | + |
| 11 | 47788664  | 47788669  | + |
| 11 | 47776283  | 47776283  | + |
| 6  | 159682206 | 159682206 | + |
| 6  | 159653635 | 159653635 | + |
| 6  | 1395043   | 1395043   | + |
| 6  | 41552429  | 41552429  | + |
| 9  | 130576075 | 130576075 | + |
| 4  | 79238649  | 79238649  | + |
| 4  | 79394836  | 79394836  | + |



VEP annotated somatic variants

|    |           |           |   |
|----|-----------|-----------|---|
| 4  | 79400868  | 79400868  | + |
| 4  | 79238496  | 79238496  | + |
| 4  | 79403146  | 79403146  | + |
| 4  | 144617842 | 144617842 | + |
| 10 | 13702231  | 13702231  | + |
| 15 | 40055973  | 40055973  | + |
| 4  | 162421109 | 162421109 | + |
| 9  | 133511390 | 133511390 | + |
| 19 | 49254573  | 49254573  | + |
| 19 | 5832589   | 5832589   | + |
| 11 | 117693255 | 117693255 | + |
| 3  | 46007702  | 46007702  | + |
| 3  | 30769948  | 30769948  | + |
| 4  | 871624    | 871624    | + |
| 4  | 905401    | 905401    | + |
| 14 | 88407917  | 88407917  | + |
| 14 | 88459656  | 88459656  | + |
| 17 | 73759061  | 73759061  | + |
| 5  | 153783587 | 153783587 | + |
| 2  | 31135184  | 31135184  | + |
| 12 | 4830000   | 4830000   | + |
| 12 | 4873163   | 4873163   | + |
| 18 | 29867504  | 29867504  | + |
| 18 | 29867091  | 29867091  | + |
| 18 | 29847739  | 29847740  | + |
| 9  | 130027009 | 130027009 | + |
| 1  | 89735314  | 89735314  | + |
| 1  | 89727870  | 89727870  | + |
| 1  | 89732237  | 89732237  | + |
| 17 | 79770740  | 79770740  | + |
| 6  | 10587056  | 10587056  | + |
| 9  | 74846104  | 74846104  | + |
| 20 | 42891809  | 42891809  | + |
| 10 | 48414549  | 48414549  | + |
| 14 | 39587348  | 39587348  | + |
| 3  | 158380546 | 158380546 | + |
| 2  | 85788140  | 85788140  | + |
| 19 | 38876464  | 38876464  | + |
| 19 | 38876352  | 38876352  | + |
| 17 | 40341909  | 40341909  | + |
| 6  | 149899916 | 149899916 | + |
| 20 | 25398790  | 25398790  | + |
| 16 | 74499589  | 74499589  | + |
| 16 | 74503860  | 74503860  | + |
| 16 | 4386645   | 4386645   | + |
| 6  | 38670837  | 38670837  | + |
| X  | 102979486 | 102979486 | + |
| X  | 102978965 | 102978965 | + |
| 12 | 104387138 | 104387138 | + |
| 11 | 58605673  | 58605673  | + |
| 2  | 70076954  | 70076954  | + |
| 22 | 23438191  | 23438191  | + |
| 22 | 19808769  | 19808769  | + |
| 4  | 68619601  | 68619601  | + |
| 12 | 133363006 | 133363006 | + |

VEP annotated somatic variants

|    |           |           |   |
|----|-----------|-----------|---|
| 17 | 4835895   | 4835895   | + |
| 13 | 95034763  | 95034763  | + |
| 6  | 24463055  | 24463055  | + |
| X  | 13795394  | 13795395  | + |
| 2  | 27851904  | 27851904  | + |
| X  | 136113464 | 136113464 | + |
| 10 | 134886618 | 134886618 | + |
| 10 | 134902253 | 134902253 | + |
| 10 | 134910629 | 134910629 | + |
| 10 | 134916366 | 134916366 | + |
| 15 | 40212031  | 40212031  | + |
| 11 | 123480981 | 123480981 | + |
| 3  | 113601761 | 113601761 | + |
| 22 | 47064164  | 47064164  | + |
| 22 | 47070747  | 47070747  | + |
| 22 | 47061659  | 47061659  | + |
| 2  | 11755497  | 11755497  | + |
| 5  | 152871721 | 152871721 | + |
| 4  | 158242540 | 158242540 | + |
| X  | 122338205 | 122338205 | + |
| 3  | 7620382   | 7620382   | + |
| 16 | 85682071  | 85682071  | + |
| 9  | 124089692 | 124089692 | + |
| X  | 51486659  | 51486659  | + |
| 11 | 67353844  | 67353844  | + |
| 14 | 77787844  | 77787844  | + |
| 10 | 1055055   | 1055055   | + |
| 10 | 1065406   | 1065406   | + |
| X  | 108628579 | 108628579 | + |
| 3  | 73024350  | 73024350  | + |
| 12 | 96384345  | 96384345  | + |
| 19 | 35775594  | 35775594  | + |
| 12 | 48192062  | 48192062  | + |
| 12 | 48181778  | 48181778  | + |
| 7  | 19015652  | 19015652  | + |
| 6  | 125598408 | 125598408 | + |
| X  | 6995315   | 6995315   | + |
| 1  | 236720467 | 236720467 | + |
| 1  | 236746511 | 236746511 | + |
| 1  | 236749626 | 236749626 | + |
| 7  | 810219    | 810219    | + |
| 14 | 31619121  | 31619121  | + |
| 14 | 31647519  | 31647519  | + |
| 10 | 96341336  | 96341336  | + |
| 10 | 96305729  | 96305729  | + |
| 3  | 50617502  | 50617502  | + |
| 15 | 64050665  | 64050665  | + |
| 6  | 26091179  | 26091179  | + |
| 7  | 81358953  | 81358953  | + |
| 3  | 42740492  | 42740492  | + |
| 14 | 100135306 | 100135306 | + |
| 17 | 42925559  | 42925559  | + |
| 5  | 130497976 | 130497976 | + |
| 6  | 26200256  | 26200256  | + |
| 6  | 26198980  | 26198980  | + |

VEP annotated somatic variants

|    |           |           |   |
|----|-----------|-----------|---|
| 6  | 26027433  | 26027433  | + |
| 10 | 70998925  | 70998925  | + |
| 6  | 33052981  | 33052981  | + |
| 21 | 38132172  | 38132172  | + |
| 3  | 148777446 | 148777448 | + |
| 11 | 118962230 | 118962230 | + |
| 22 | 35680095  | 35680095  | + |
| 22 | 35660875  | 35660875  | + |
| 12 | 121431272 | 121431272 | + |
| 19 | 41807363  | 41807363  | + |
| 19 | 12877042  | 12877042  | + |
| 19 | 35551225  | 35551226  | + |
| 10 | 103825747 | 103825747 | + |
| 19 | 36247708  | 36247708  | + |
| 7  | 154862621 | 154862621 | + |
| X  | 53641647  | 53641647  | + |
| X  | 53602646  | 53602646  | + |
| 21 | 45656774  | 45656774  | + |
| 21 | 45655519  | 45655519  | + |
| 21 | 45643008  | 45643008  | + |
| 15 | 90634691  | 90634691  | + |
| 15 | 78457242  | 78457242  | + |
| 1  | 158986477 | 158986477 | + |
| 21 | 34614255  | 34614255  | + |
| 15 | 99473606  | 99473606  | + |
| 6  | 160465753 | 160465753 | + |
| 6  | 160524773 | 160524773 | + |
| 6  | 160479882 | 160479882 | + |
| 19 | 51825238  | 51825238  | + |
| X  | 130415818 | 130415818 | + |
| X  | 130410965 | 130410965 | + |
| X  | 130416878 | 130416878 | + |
| 3  | 118624631 | 118624631 | + |
| 3  | 118621664 | 118621664 | + |
| 3  | 118645118 | 118645118 | + |
| 11 | 18741260  | 18741260  | + |
| 11 | 133805441 | 133805444 | + |
| 9  | 111653574 | 111653574 | + |
| 3  | 9969933   | 9969934   | + |
| 6  | 137330503 | 137330503 | + |
| 1  | 24463854  | 24463854  | + |
| 10 | 6054765   | 6054765   | + |
| 16 | 30016820  | 30016820  | + |
| 11 | 2181073   | 2181073   | + |
| 11 | 2169110   | 2169110   | + |
| 19 | 7166376   | 7166376   | + |
| 19 | 7167951   | 7167951   | + |
| 7  | 1538021   | 1538021   | + |
| 7  | 1510719   | 1510719   | + |
| 13 | 51956067  | 51956067  | + |
| 5  | 75907065  | 75907065  | + |
| 1  | 156505079 | 156505079 | + |
| 12 | 280349    | 280349    | + |
| 7  | 128588475 | 128588475 | + |
| 19 | 44223667  | 44223667  | + |

VEP annotated somatic variants

|    |           |           |   |
|----|-----------|-----------|---|
| 1  | 145538664 | 145538664 | + |
| 1  | 145535921 | 145535921 | + |
| 2  | 182360182 | 182360182 | + |
| 3  | 37695192  | 37695192  | + |
| 3  | 52855229  | 52855229  | + |
| 3  | 52860936  | 52860936  | + |
| 3  | 52851137  | 52851137  | + |
| X  | 78618050  | 78618050  | + |
| 1  | 226836498 | 226836498 | + |
| 12 | 26869233  | 26869233  | + |
| 12 | 26572244  | 26572244  | + |
| 6  | 33635565  | 33635565  | + |
| 10 | 106075081 | 106075081 | + |
| 21 | 35247611  | 35247611  | + |
| 21 | 35230921  | 35230921  | + |
| 4  | 129770068 | 129770068 | + |
| X  | 46884050  | 46884050  | + |
| 10 | 133963466 | 133963466 | + |
| 6  | 15374533  | 15374533  | + |
| 6  | 15487782  | 15487782  | + |
| 6  | 15496662  | 15496662  | + |
| 11 | 96125436  | 96125437  | + |
| 9  | 745289    | 745289    | + |
| 1  | 62704134  | 62704134  | + |
| 1  | 62739198  | 62739198  | + |
| 1  | 62713246  | 62713246  | + |
| 6  | 149953981 | 149953981 | + |
| 19 | 49574125  | 49574125  | + |
| 3  | 156233996 | 156233996 | + |
| 8  | 36662680  | 36662680  | + |
| 7  | 128533818 | 128533818 | + |
| 12 | 109907308 | 109907308 | + |
| 13 | 45768759  | 45768759  | + |
| 5  | 137760048 | 137760048 | + |
| 1  | 44137607  | 44137607  | + |
| 19 | 5135337   | 5135337   | + |
| Y  | 21905008  | 21905008  | + |
| X  | 44929077  | 44929077  | + |
| 7  | 139820354 | 139820354 | + |
| 7  | 139801777 | 139801777 | + |
| 7  | 139797431 | 139797431 | + |
| 22 | 45608192  | 45608192  | + |
| 4  | 123111354 | 123111354 | + |
| 6  | 138584685 | 138584685 | + |
| 8  | 95521854  | 95521861  | + |
| 19 | 18368608  | 18368608  | + |
| 6  | 111583381 | 111583381 | + |
| 1  | 200577919 | 200577919 | + |
| 1  | 21042094  | 21042094  | + |
| 17 | 72339369  | 72339369  | + |
| 2  | 241722621 | 241722622 | + |
| 17 | 4910485   | 4910485   | + |
| 10 | 91505816  | 91505817  | + |
| 1  | 169993762 | 169993762 | + |
| 10 | 7808086   | 7808086   | + |

VEP annotated somatic variants

|    |           |           |   |
|----|-----------|-----------|---|
| 8  | 103663912 | 103663912 | + |
| 4  | 166141086 | 166141086 | + |
| 4  | 88091449  | 88091449  | + |
| 12 | 9147926   | 9147926   | + |
| 7  | 151836397 | 151836397 | + |
| 10 | 135015427 | 135015427 | + |
| 12 | 123087442 | 123087442 | + |
| 7  | 98782750  | 98782750  | + |
| 17 | 45747277  | 45747277  | + |
| 22 | 29533275  | 29533275  | + |
| 17 | 38974814  | 38974814  | + |
| 17 | 39620733  | 39620733  | + |
| 17 | 39642561  | 39642561  | + |
| 21 | 46047971  | 46047971  | + |
| 21 | 46078220  | 46078220  | + |
| 21 | 46074202  | 46074202  | + |
| 22 | 41620825  | 41620825  | + |
| 6  | 129674562 | 129674562 | + |
| 6  | 129380844 | 129380844 | + |
| 6  | 112506375 | 112506375 | + |
| 6  | 112506583 | 112506583 | + |
| 1  | 183099701 | 183099701 | + |
| 1  | 183079853 | 183079853 | + |
| 1  | 183104013 | 183104013 | + |
| 1  | 183155482 | 183155482 | + |
| 6  | 150004779 | 150004779 | + |
| 1  | 152573162 | 152573162 | + |
| 9  | 139649217 | 139649218 | + |
| 1  | 22148164  | 22148164  | + |
| 12 | 65612499  | 65612499  | + |
| 7  | 2565268   | 2565268   | + |
| 19 | 54848986  | 54848986  | + |
| 7  | 73522361  | 73522361  | + |
| 19 | 2290499   | 2290499   | + |
| 12 | 49494854  | 49494854  | + |
| 13 | 76395278  | 76395278  | + |
| 5  | 96349590  | 96349590  | + |
| 8  | 12600837  | 12600837  | + |
| X  | 118108785 | 118108785 | + |
| X  | 118120908 | 118120908 | + |
| 15 | 74238734  | 74238734  | + |
| 3  | 188426256 | 188426256 | + |
| 12 | 25249785  | 25249785  | + |
| 2  | 140992337 | 140992337 | + |
| 11 | 68179125  | 68179125  | + |
| 22 | 25750656  | 25750656  | + |
| 22 | 25747923  | 25747923  | + |
| 4  | 3521939   | 3521939   | + |
| 14 | 50069282  | 50069282  | + |
| 10 | 50122181  | 50122181  | + |
| 8  | 86057798  | 86057798  | + |
| 12 | 85547008  | 85547008  | + |
| 3  | 194387253 | 194387253 | + |
| 19 | 34706203  | 34706203  | + |
| 4  | 147110891 | 147110891 | + |

VEP annotated somatic variants

|    |           |           |   |
|----|-----------|-----------|---|
| 21 | 47630550  | 47630550  | + |
| 21 | 30315730  | 30315730  | + |
| 11 | 24998286  | 24998286  | + |
| 19 | 42343155  | 42343155  | + |
| 1  | 151137793 | 151137793 | + |
| 10 | 102770082 | 102770082 | + |
| 10 | 102762256 | 102762256 | + |
| 7  | 2108982   | 2108982   | + |
| 4  | 120983259 | 120983259 | + |
| X  | 152483088 | 152483088 | + |
| X  | 151899913 | 151899913 | + |
| X  | 30260217  | 30260217  | + |
| X  | 140993150 | 140993150 | + |
| X  | 141290865 | 141290865 | + |
| X  | 54836127  | 54836127  | + |
| 9  | 139752333 | 139752333 | + |
| X  | 149680539 | 149680539 | + |
| 6  | 119509785 | 119509785 | + |
| 5  | 109110537 | 109110537 | + |
| 4  | 6594947   | 6594947   | + |
| 19 | 17838787  | 17838787  | + |
| X  | 19482476  | 19482476  | + |
| 17 | 61770856  | 61770856  | + |
| 19 | 39100297  | 39100297  | + |
| 2  | 102445893 | 102445893 | + |
| 3  | 50679045  | 50679047  | + |
| 19 | 12958360  | 12958360  | + |
| 19 | 12963143  | 12963143  | + |
| 5  | 65892448  | 65892448  | + |
| 20 | 43933021  | 43933021  | + |
| 3  | 182754967 | 182754967 | + |
| 21 | 47674275  | 47674275  | + |
| 6  | 37623626  | 37623626  | + |
| 6  | 90363802  | 90363802  | + |
| 6  | 90363803  | 90363803  | + |
| X  | 153296337 | 153296337 | + |
| X  | 40514122  | 40514122  | + |
| 9  | 136213521 | 136213521 | + |
| 19 | 50335510  | 50335510  | + |
| 19 | 39884273  | 39884273  | + |
| 19 | 19297630  | 19297630  | + |
| 1  | 3415657   | 3415657   | + |
| 18 | 29800119  | 29800119  | + |
| 2  | 112786523 | 112786524 | + |
| 14 | 21970091  | 21970091  | + |
| 2  | 172188368 | 172188368 | + |
| 19 | 3546185   | 3546185   | + |
| 17 | 74936576  | 74936576  | + |
| 17 | 74921257  | 74921257  | + |
| 17 | 74928758  | 74928758  | + |
| 10 | 131506283 | 131506283 | + |
| 22 | 18379160  | 18379160  | + |
| 22 | 18368548  | 18368548  | + |
| 22 | 18372020  | 18372020  | + |
| X  | 10437968  | 10437968  | + |

VEP annotated somatic variants

|    |           |           |   |
|----|-----------|-----------|---|
| 17 | 4784249   | 4784249   | + |
| 17 | 4796656   | 4796656   | + |
| 12 | 121132100 | 121132100 | + |
| 1  | 233512362 | 233512362 | + |
| 19 | 6262355   | 6262355   | + |
| 10 | 127460753 | 127460753 | + |
| 7  | 156801661 | 156801661 | + |
| 19 | 2076974   | 2076974   | + |
| X  | 106221490 | 106221490 | + |
| X  | 106200202 | 106200202 | + |
| 15 | 79133026  | 79133026  | + |
| 11 | 118108003 | 118108003 | + |
| 11 | 94225807  | 94225807  | + |
| 1  | 55119515  | 55119515  | + |
| 1  | 55139741  | 55139741  | + |
| 1  | 55136529  | 55136529  | + |
| 17 | 45904163  | 45904163  | + |
| 9  | 140446449 | 140446449 | + |
| 10 | 102746829 | 102746829 | + |
| 6  | 42176544  | 42176544  | + |
| 11 | 10655623  | 10655623  | + |
| 2  | 47635776  | 47635776  | + |
| 4  | 166259161 | 166259161 | + |
| 1  | 11181327  | 11181327  | + |
| 1  | 237054569 | 237054569 | + |
| 1  | 237060433 | 237060433 | + |
| 1  | 237001926 | 237001926 | + |
| 1  | 237057608 | 237057608 | + |
| 4  | 100513028 | 100513031 | + |
| 19 | 8997189   | 8997190   | + |
| 19 | 9084216   | 9084216   | + |
| 12 | 40805948  | 40805948  | + |
| 12 | 40954482  | 40954482  | + |
| 11 | 1101649   | 1101649   | + |
| 16 | 88721012  | 88721012  | + |
| X  | 3228891   | 3228891   | + |
| 17 | 79899495  | 79899495  | + |
| 11 | 47371485  | 47371485  | + |
| 16 | 15820863  | 15820863  | + |
| 3  | 108174537 | 108174537 | + |
| 14 | 23899027  | 23899027  | + |
| 14 | 23895893  | 23895893  | + |
| 14 | 23887645  | 23887645  | + |
| 22 | 36691526  | 36691526  | + |
| 3  | 123411589 | 123411589 | + |
| 17 | 18058371  | 18058371  | + |
| 22 | 26241994  | 26241994  | + |
| 17 | 34863439  | 34863439  | + |
| 19 | 8587782   | 8587782   | + |
| 15 | 52629950  | 52629950  | + |
| 19 | 17283491  | 17283491  | + |
| 1  | 203055101 | 203055101 | + |
| 10 | 69908113  | 69908113  | + |
| 11 | 61551927  | 61551927  | + |
| 1  | 59134792  | 59134792  | + |

VEP annotated somatic variants

|    |           |           |   |
|----|-----------|-----------|---|
| 9  | 88633829  | 88633829  | + |
| 9  | 138908250 | 138908250 | + |
| 16 | 5083982   | 5083982   | + |
| 19 | 50862768  | 50862768  | + |
| 17 | 72769694  | 72769694  | + |
| 2  | 15448311  | 15448311  | + |
| 17 | 41361960  | 41361960  | + |
| 17 | 41352643  | 41352643  | + |
| 17 | 41330024  | 41330024  | + |
| 17 | 41331460  | 41331460  | + |
| 19 | 19329924  | 19329924  | + |
| 12 | 6620226   | 6620226   | + |
| 11 | 134031588 | 134031588 | + |
| 2  | 97032981  | 97032981  | + |
| 20 | 33342477  | 33342477  | + |
| 17 | 15950198  | 15950198  | + |
| 1  | 161183516 | 161183516 | + |
| 2  | 152474076 | 152474076 | + |
| 2  | 152552062 | 152552062 | + |
| 2  | 152581866 | 152581866 | + |
| 4  | 1986542   | 1986542   | + |
| 1  | 212619339 | 212619339 | + |
| 1  | 212617829 | 212617829 | + |
| 1  | 78395131  | 78395131  | + |
| 4  | 103518843 | 103518843 | + |
| 10 | 104155836 | 104155836 | + |
| 3  | 101571550 | 101571550 | + |
| 6  | 18122526  | 18122526  | + |
| 6  | 138820324 | 138820324 | + |
| 1  | 236176623 | 236176623 | + |
| 14 | 51214888  | 51214888  | + |
| 1  | 24782847  | 24782847  | + |
| 5  | 156898690 | 156898690 | + |
| 5  | 37064164  | 37064164  | + |
| 22 | 29966083  | 29966083  | + |
| 3  | 52514529  | 52514529  | + |
| 14 | 37050642  | 37050642  | + |
| X  | 70386825  | 70386825  | + |
| 2  | 32449872  | 32449872  | + |
| 19 | 56565263  | 56565263  | + |
| 19 | 56552456  | 56552456  | + |
| 19 | 56520125  | 56520125  | + |
| 19 | 56228067  | 56228067  | + |
| 12 | 132635989 | 132635989 | + |
| 9  | 33469427  | 33469427  | + |
| 4  | 2941418   | 2941418   | + |
| 20 | 2638982   | 2638982   | + |
| 1  | 162335052 | 162335052 | + |
| 7  | 150696111 | 150696111 | + |
| 7  | 150703675 | 150703675 | + |
| 9  | 139396983 | 139396983 | + |
| 9  | 139405530 | 139405530 | + |
| 7  | 44553238  | 44553238  | + |
| 10 | 72015573  | 72015573  | + |
| 7  | 34874038  | 34874038  | + |



VEP annotated somatic variants

|    |           |           |   |
|----|-----------|-----------|---|
| 7  | 98254560  | 98254561  | + |
| 3  | 23986983  | 23986983  | + |
| 1  | 161208255 | 161208258 | + |
| 14 | 90752619  | 90752619  | + |
| 5  | 176639105 | 176639105 | + |
| 5  | 6605532   | 6605532   | + |
| 3  | 52558768  | 52558768  | + |
| 19 | 49559693  | 49559693  | + |
| 7  | 44444122  | 44444122  | + |
| 13 | 45540136  | 45540136  | + |
| 8  | 27925796  | 27925796  | + |
| 12 | 69109579  | 69109579  | + |
| 9  | 134103759 | 134103759 | + |
| 6  | 150067675 | 150067675 | + |
| 22 | 45580592  | 45580597  | + |
| 4  | 77045986  | 77045990  | + |
| 4  | 77038807  | 77038807  | + |
| 17 | 5289676   | 5289676   | + |
| 17 | 5290824   | 5290824   | + |
| X  | 102339606 | 102339606 | + |
| X  | 101087618 | 101087618 | + |
| X  | 101087497 | 101087497 | + |
| X  | 101087498 | 101087498 | + |
| 17 | 708531    | 708531    | + |
| 6  | 41036770  | 41036770  | + |
| 2  | 220431802 | 220431802 | + |
| 17 | 80350331  | 80350331  | + |
| 19 | 46056620  | 46056620  | + |
| 7  | 99473624  | 99473624  | + |
| 17 | 3195503   | 3195503   | + |
| 11 | 55111222  | 55111222  | + |
| 11 | 51412353  | 51412353  | + |
| 11 | 55340552  | 55340552  | + |
| 11 | 5322520   | 5322520   | + |
| 11 | 5809477   | 5809477   | + |
| 14 | 21623290  | 21623290  | + |
| 3  | 97888302  | 97888302  | + |
| 11 | 55703247  | 55703247  | + |
| 11 | 56043056  | 56043056  | + |
| 20 | 60847086  | 60847086  | + |
| 16 | 83998662  | 83998662  | + |
| 16 | 83999033  | 83999033  | + |
| 5  | 38921662  | 38921663  | + |
| 15 | 31823062  | 31823062  | + |
| 14 | 23240713  | 23240714  | + |
| X  | 69478942  | 69478942  | + |
| 17 | 79805134  | 79805134  | + |
| 1  | 40035320  | 40035320  | + |
| 11 | 65994941  | 65994941  | + |
| X  | 55248320  | 55248320  | + |
| 19 | 726200    | 726200    | + |
| 10 | 91358943  | 91358943  | + |
| 10 | 91404448  | 91404448  | + |
| 1  | 2444414   | 2444414   | + |
| 2  | 61021342  | 61021342  | + |

VEP annotated somatic variants

|    |           |           |   |
|----|-----------|-----------|---|
| 1  | 55224751  | 55224751  | + |
| 11 | 12525925  | 12525925  | + |
| 22 | 44547355  | 44547355  | + |
| 2  | 114001921 | 114001921 | + |
| 6  | 138539315 | 138539315 | + |
| 10 | 55826470  | 55826470  | + |
| 13 | 66879139  | 66879139  | + |
| 7  | 82546282  | 82546282  | + |
| 6  | 150114745 | 150114745 | + |
| 21 | 47851424  | 47851424  | + |
| 3  | 57542173  | 57542173  | + |
| 2  | 183387446 | 183387446 | + |
| 11 | 72290629  | 72290629  | + |
| 10 | 95372734  | 95372734  | + |
| 4  | 55139638  | 55139638  | + |
| 5  | 149495395 | 149495395 | + |
| 5  | 149497177 | 149497177 | + |
| 10 | 26994150  | 26994150  | + |
| 16 | 15129459  | 15129459  | + |
| 16 | 15132108  | 15132108  | + |
| 10 | 102775350 | 102775350 | + |
| 15 | 77407114  | 77407114  | + |
| 1  | 156875037 | 156875037 | + |
| 1  | 156873727 | 156873727 | + |
| 1  | 156878737 | 156878737 | + |
| 19 | 33878837  | 33878837  | + |
| 19 | 33878198  | 33878198  | + |
| 10 | 3154534   | 3154534   | + |
| 10 | 3154339   | 3154339   | + |
| 2  | 197737842 | 197737842 | + |
| X  | 77380307  | 77380307  | + |
| 19 | 15582863  | 15582863  | + |
| 1  | 153283179 | 153283179 | + |
| 9  | 96415653  | 96415653  | + |
| 6  | 79651133  | 79651134  | + |
| X  | 71876187  | 71876187  | + |
| 11 | 118520918 | 118520918 | + |
| 11 | 587425    | 587425    | + |
| 1  | 111893958 | 111893958 | + |
| 1  | 77588131  | 77588131  | + |
| 18 | 59768375  | 59768375  | + |
| 17 | 34893326  | 34893326  | + |
| 17 | 8784361   | 8784361   | + |
| 2  | 209150361 | 209150361 | + |
| 22 | 50354819  | 50354819  | + |
| 22 | 25158326  | 25158326  | + |
| X  | 68381912  | 68381912  | + |
| 16 | 81193433  | 81193433  | + |
| 6  | 51712492  | 51712492  | + |
| 12 | 32974218  | 32974218  | + |
| 6  | 46684925  | 46684925  | + |
| 8  | 42037630  | 42037630  | + |
| 2  | 28771854  | 28771854  | + |
| 10 | 96053239  | 96053239  | + |
| 10 | 96014622  | 96014622  | + |

VEP annotated somatic variants

|    |           |           |   |
|----|-----------|-----------|---|
| 10 | 96084372  | 96084373  | + |
| 10 | 96058298  | 96058298  | + |
| 16 | 81887957  | 81887957  | + |
| 1  | 2409892   | 2409892   | + |
| 1  | 2420590   | 2420590   | + |
| 8  | 145001031 | 145001031 | + |
| 8  | 145011204 | 145011204 | + |
| 8  | 144990335 | 144990335 | + |
| 8  | 144995736 | 144995736 | + |
| 8  | 144990528 | 144990528 | + |
| 8  | 144992862 | 144992862 | + |
| 1  | 6533599   | 6533599   | + |
| 14 | 68046602  | 68046602  | + |
| 14 | 68041124  | 68041124  | + |
| 14 | 68053149  | 68053149  | + |
| 1  | 908823    | 908823    | + |
| 19 | 1528149   | 1528150   | + |
| 17 | 37234111  | 37234111  | + |
| 22 | 50724733  | 50724733  | + |
| 6  | 99862600  | 99862601  | + |
| 6  | 36274153  | 36274153  | + |
| 22 | 44341986  | 44341986  | + |
| 19 | 7615903   | 7615903   | + |
| 12 | 89919631  | 89919632  | + |
| 11 | 62529460  | 62529460  | + |
| 20 | 18453391  | 18453391  | + |
| 20 | 18464101  | 18464101  | + |
| 13 | 38154189  | 38154189  | + |
| 8  | 128428656 | 128428656 | + |
| 3  | 12393125  | 12393125  | + |
| 3  | 12475557  | 12475557  | + |
| 22 | 22036832  | 22036832  | + |
| 17 | 56833457  | 56833458  | + |
| 1  | 161136843 | 161136843 | + |
| 17 | 79791792  | 79791792  | + |
| 10 | 133769482 | 133769482 | + |
| 3  | 135742057 | 135742058 | + |
| X  | 48759204  | 48759204  | + |
| 4  | 121737767 | 121737767 | + |
| 4  | 81121524  | 81121524  | + |
| X  | 23685964  | 23685964  | + |
| X  | 23689636  | 23689636  | + |
| X  | 23689637  | 23689637  | + |
| 6  | 105850712 | 105850712 | + |
| 8  | 69002965  | 69002965  | + |
| 11 | 57156438  | 57156438  | + |
| 4  | 185578248 | 185578248 | + |
| 3  | 53220569  | 53220569  | + |
| 3  | 53223287  | 53223291  | + |
| 1  | 2076055   | 2076055   | + |
| 14 | 23394327  | 23394327  | + |
| 19 | 5783713   | 5783713   | + |
| 22 | 45126638  | 45126638  | + |
| 22 | 45243780  | 45243780  | + |
| 16 | 31152697  | 31152698  | + |

VEP annotated somatic variants

|    |           |           |   |
|----|-----------|-----------|---|
| 9  | 79234158  | 79234159  | + |
| 19 | 43579815  | 43579815  | + |
| 19 | 43430945  | 43430945  | + |
| 19 | 43762316  | 43762316  | + |
| 17 | 65341976  | 65341976  | + |
| 21 | 40549289  | 40549289  | + |
| 18 | 12703067  | 12703067  | + |
| 9  | 114348513 | 114348513 | + |
| 10 | 129870510 | 129870510 | + |
| 1  | 44064623  | 44064623  | + |
| 3  | 61734539  | 61734539  | + |
| 6  | 128307118 | 128307118 | + |
| 7  | 157396697 | 157396697 | + |
| 16 | 1536677   | 1536677   | + |
| 1  | 31414769  | 31414769  | + |
| 1  | 31440212  | 31440212  | + |
| 1  | 31406228  | 31406228  | + |
| 1  | 31409473  | 31409474  | + |
| 15 | 55841281  | 55841281  | + |
| 12 | 21590621  | 21590621  | + |
| 17 | 29844658  | 29844658  | + |
| 2  | 238494742 | 238494742 | + |
| 11 | 87908563  | 87908563  | + |
| X  | 69502479  | 69502479  | + |
| 17 | 5249998   | 5249998   | + |
| 14 | 24736027  | 24736027  | + |
| 17 | 79990418  | 79990419  | + |
| 14 | 68290372  | 68290372  | + |
| 7  | 4845312   | 4845312   | + |
| 3  | 12626516  | 12626516  | + |
| 5  | 34687135  | 34687135  | + |
| 1  | 21932530  | 21932530  | + |
| 12 | 48134214  | 48134214  | + |
| 11 | 47463484  | 47463484  | + |
| 3  | 50378154  | 50378154  | + |
| X  | 47045138  | 47045138  | + |
| 13 | 79929326  | 79929326  | + |
| 5  | 145647151 | 145647151 | + |
| 8  | 30242747  | 30242747  | + |
| 9  | 36105264  | 36105264  | + |
| 19 | 45513147  | 45513152  | + |
| 6  | 139264930 | 139264930 | + |
| 3  | 108475993 | 108475994 | + |
| 22 | 29834766  | 29834766  | + |
| 3  | 53125922  | 53125922  | + |
| 3  | 53126143  | 53126143  | + |
| 3  | 16450872  | 16450872  | + |
| 19 | 11529958  | 11529958  | + |
| 1  | 240975213 | 240975213 | + |
| 22 | 45809698  | 45809698  | + |
| 21 | 43161022  | 43161022  | + |
| 2  | 86992337  | 86992338  | + |
| 2  | 86947783  | 86947783  | + |
| 19 | 12917761  | 12917761  | + |
| 1  | 182555819 | 182555819 | + |

VEP annotated somatic variants

|    |           |           |   |
|----|-----------|-----------|---|
| 17 | 41180772  | 41180772  | + |
| 4  | 154633581 | 154633581 | + |
| 1  | 33414040  | 33414040  | + |
| 17 | 8296080   | 8296080   | + |
| 3  | 78711350  | 78711350  | + |
| 3  | 78737962  | 78737962  | + |
| 2  | 11359120  | 11359120  | + |
| 1  | 64608423  | 64608423  | + |
| 6  | 117714346 | 117714346 | + |
| 22 | 30682404  | 30682404  | + |
| 13 | 76210742  | 76210742  | + |
| 10 | 97748040  | 97748040  | + |
| 12 | 31267744  | 31267744  | + |
| 1  | 15671483  | 15671483  | + |
| 12 | 48081637  | 48081637  | + |
| 17 | 181479    | 181479    | + |
| 19 | 17973862  | 17973862  | + |
| 17 | 27047015  | 27047016  | + |
| 17 | 27047016  | 27047017  | + |
| 22 | 39714490  | 39714490  | + |
| X  | 71493691  | 71493691  | + |
| 6  | 166862431 | 166862431 | + |
| 17 | 78897547  | 78897547  | + |
| 17 | 78896529  | 78896529  | + |
| 21 | 45089877  | 45089877  | + |
| 21 | 45096206  | 45096206  | + |
| 17 | 48559559  | 48559559  | + |
| 10 | 16806545  | 16806545  | + |
| 11 | 63487386  | 63487386  | + |
| 5  | 178986987 | 178986987 | + |
| 5  | 179036457 | 179036457 | + |
| 10 | 70167004  | 70167004  | + |
| 9  | 137328286 | 137328286 | + |
| 19 | 38959680  | 38959680  | + |
| 19 | 38933120  | 38933120  | + |
| 19 | 38985101  | 38985101  | + |
| 19 | 38993118  | 38993118  | + |
| 1  | 237551376 | 237551376 | + |
| 1  | 237765470 | 237765470 | + |
| 15 | 33795775  | 33795775  | + |
| 13 | 21720868  | 21720868  | + |
| 9  | 136584264 | 136584264 | + |
| 7  | 66459145  | 66459145  | + |
| 22 | 50885775  | 50885775  | + |
| 11 | 9830595   | 9830595   | + |
| 19 | 50150105  | 50150105  | + |
| 1  | 155230131 | 155230131 | + |
| 22 | 20784217  | 20784217  | + |
| 13 | 78130924  | 78130924  | + |
| 7  | 12610594  | 12610594  | + |
| 4  | 129878342 | 129878342 | + |
| 4  | 129805716 | 129805716 | + |
| 6  | 108026402 | 108026402 | + |
| 2  | 166012203 | 166012203 | + |
| 2  | 167099158 | 167099158 | + |

VEP annotated somatic variants

|    |           |           |   |
|----|-----------|-----------|---|
| 2  | 167060449 | 167060449 | + |
| 1  | 226187129 | 226187129 | + |
| 7  | 4002204   | 4002204   | + |
| 3  | 10353538  | 10353538  | + |
| 22 | 30934886  | 30934886  | + |
| 1  | 177917479 | 177917479 | + |
| 20 | 18523002  | 18523002  | + |
| 4  | 119726949 | 119726949 | + |
| 10 | 102265446 | 102265448 | + |
| 10 | 102275780 | 102275780 | + |
| 10 | 102269206 | 102269206 | + |
| 10 | 102258439 | 102258439 | + |
| 9  | 91943884  | 91943884  | + |
| 17 | 80280054  | 80280054  | + |
| 1  | 169700961 | 169700961 | + |
| 1  | 169563062 | 169563062 | + |
| 7  | 83739762  | 83739762  | + |
| 7  | 83764309  | 83764309  | + |
| 3  | 50219991  | 50219991  | + |
| 22 | 42392811  | 42392811  | + |
| 14 | 95088626  | 95088626  | + |
| 19 | 40929553  | 40929553  | + |
| 12 | 122255910 | 122255910 | + |
| 12 | 122248775 | 122248775 | + |
| 3  | 9484025   | 9484025   | + |
| 22 | 26688388  | 26688388  | + |
| 16 | 70601254  | 70601254  | + |
| 6  | 144416685 | 144416685 | + |
| 10 | 72635144  | 72635145  | + |
| 17 | 2268681   | 2268681   | + |
| 17 | 2268139   | 2268139   | + |
| 22 | 40802739  | 40802739  | + |
| 1  | 87208953  | 87208953  | + |
| 10 | 105363289 | 105363289 | + |
| 19 | 51207508  | 51207508  | + |
| 19 | 51207775  | 51207775  | + |
| 7  | 155599300 | 155599300 | + |
| X  | 9900279   | 9900279   | + |
| 19 | 52004469  | 52004469  | + |
| 21 | 44845436  | 44845437  | + |
| 21 | 38118089  | 38118089  | + |
| 1  | 232601241 | 232601241 | + |
| 1  | 160720074 | 160720074 | + |
| 4  | 48485674  | 48485674  | + |
| 4  | 87769929  | 87769929  | + |
| 5  | 1089037   | 1089037   | + |
| 7  | 122808528 | 122808528 | + |
| X  | 73641569  | 73641569  | + |
| 19 | 15065171  | 15065171  | + |
| 19 | 15079104  | 15079104  | + |
| 5  | 131705949 | 131705949 | + |
| 5  | 138714817 | 138714817 | + |
| 14 | 92909073  | 92909073  | + |
| 7  | 95906737  | 95906738  | + |
| 17 | 42399754  | 42399754  | + |

VEP annotated somatic variants

|    |           |           |   |
|----|-----------|-----------|---|
| 17 | 42399223  | 42399223  | + |
| 17 | 78225035  | 78225035  | + |
| 15 | 85451852  | 85451852  | + |
| 15 | 45560655  | 45560655  | + |
| 9  | 130167338 | 130167338 | + |
| 7  | 133984878 | 133984878 | + |
| 6  | 118475798 | 118475798 | + |
| 1  | 234458668 | 234458668 | + |
| 11 | 124954282 | 124954282 | + |
| 3  | 50254624  | 50254624  | + |
| 16 | 58709777  | 58709777  | + |
| 8  | 142225990 | 142225990 | + |
| 7  | 150765236 | 150765236 | + |
| 19 | 18001839  | 18001839  | + |
| X  | 115586700 | 115586700 | + |
| 19 | 49812403  | 49812403  | + |
| 17 | 28549898  | 28549898  | + |
| 1  | 44463170  | 44463170  | + |
| 14 | 23607271  | 23607271  | + |
| 14 | 23598976  | 23598976  | + |
| X  | 46618321  | 46618321  | + |
| 3  | 133670201 | 133670209 | + |
| X  | 128614827 | 128614827 | + |
| 4  | 144449251 | 144449252 | + |
| 22 | 45779553  | 45779553  | + |
| 14 | 70418881  | 70418881  | + |
| 22 | 31493125  | 31493125  | + |
| 1  | 246078824 | 246078824 | + |
| 10 | 97099169  | 97099169  | + |
| 4  | 7731310   | 7731310   | + |
| 1  | 118644430 | 118644430 | + |
| 1  | 118629599 | 118629599 | + |
| X  | 142795438 | 142795438 | + |
| 8  | 145086924 | 145086924 | + |
| 2  | 220353104 | 220353104 | + |
| 2  | 220349351 | 220349351 | + |
| 19 | 38782485  | 38782485  | + |
| 10 | 73848075  | 73848075  | + |
| 15 | 42155816  | 42155816  | + |
| 15 | 42166333  | 42166333  | + |
| 16 | 30735348  | 30735348  | + |
| 7  | 149517978 | 149517978 | + |
| 7  | 149507964 | 149507964 | + |
| 7  | 149518961 | 149518961 | + |
| 3  | 8668094   | 8668094   | + |
| 16 | 70415567  | 70415567  | + |
| 17 | 74570707  | 74570707  | + |
| 17 | 74570408  | 74570408  | + |
| 9  | 130672600 | 130672600 | + |
| 12 | 104092996 | 104092996 | + |
| 2  | 74058260  | 74058260  | + |
| 4  | 68447040  | 68447040  | + |
| 15 | 42986979  | 42986979  | + |
| 2  | 191937738 | 191937738 | + |
| 17 | 40354497  | 40354497  | + |

VEP annotated somatic variants

|    |           |           |   |
|----|-----------|-----------|---|
| 8  | 74585325  | 74585325  | + |
| 15 | 74277795  | 74277795  | + |
| 17 | 79980756  | 79980756  | + |
| 7  | 134943328 | 134943328 | + |
| 9  | 125932153 | 125932156 | + |
| 1  | 110581780 | 110581780 | + |
| 7  | 129102743 | 129102743 | + |
| 6  | 147695051 | 147695051 | + |
| 12 | 10782115  | 10782115  | + |
| 7  | 75623954  | 75623954  | + |
| 3  | 151599379 | 151599379 | + |
| 21 | 46233863  | 46233863  | + |
| 6  | 149721690 | 149721690 | + |
| 19 | 39964247  | 39964247  | + |
| 19 | 39949764  | 39949764  | + |
| 9  | 95840077  | 95840077  | + |
| 11 | 9734945   | 9734945   | + |
| 19 | 46319415  | 46319415  | + |
| 3  | 12224712  | 12224712  | + |
| 14 | 64408852  | 64408852  | + |
| 14 | 64497710  | 64497710  | + |
| 6  | 158502527 | 158502527 | + |
| 15 | 99670265  | 99670265  | + |
| 4  | 119947985 | 119947985 | + |
| 6  | 149700491 | 149700491 | + |
| 6  | 149718650 | 149718650 | + |
| 4  | 1732978   | 1732978   | + |
| X  | 100532985 | 100532985 | + |
| 6  | 159461931 | 159461931 | + |
| 6  | 159463221 | 159463221 | + |
| 15 | 102196186 | 102196186 | + |
| 15 | 102211654 | 102211654 | + |
| 3  | 10302172  | 10302172  | + |
| 3  | 10318230  | 10318231  | + |
| 22 | 47189616  | 47189616  | + |
| 13 | 76055397  | 76055397  | + |
| 3  | 17208267  | 17208267  | + |
| 4  | 107153024 | 107153024 | + |
| 11 | 67402744  | 67402744  | + |
| X  | 101382005 | 101382005 | + |
| 1  | 24078504  | 24078504  | + |
| 5  | 145834529 | 145834529 | + |
| 22 | 31022590  | 31022590  | + |
| 14 | 104436931 | 104436931 | + |
| X  | 123538803 | 123538810 | + |
| 5  | 167652999 | 167652999 | + |
| 16 | 69395434  | 69395434  | + |
| 2  | 74307792  | 74307793  | + |
| 17 | 56692800  | 56692800  | + |
| 17 | 62232165  | 62232165  | + |
| 13 | 31531009  | 31531009  | + |
| 6  | 155606325 | 155606325 | + |
| X  | 132351861 | 132351861 | + |
| 19 | 54613420  | 54613420  | + |
| 1  | 92200593  | 92200593  | + |



VEP annotated somatic variants

|    |           |           |   |
|----|-----------|-----------|---|
| X  | 89177673  | 89177673  | + |
| 15 | 43579566  | 43579566  | + |
| 6  | 169622263 | 169622263 | + |
| 19 | 373619    | 373619    | + |
| 7  | 11581134  | 11581134  | + |
| 14 | 24029340  | 24029340  | + |
| 2  | 39996767  | 39996767  | + |
| 21 | 32525542  | 32525542  | + |
| 6  | 155571135 | 155571135 | + |
| 19 | 4816719   | 4816719   | + |
| 18 | 71825731  | 71825731  | + |
| 3  | 53268965  | 53268965  | + |
| 3  | 53260716  | 53260716  | + |
| 17 | 27053148  | 27053148  | + |
| 15 | 70346923  | 70346923  | + |
| 15 | 70349744  | 70349744  | + |
| 17 | 60558610  | 60558610  | + |
| 4  | 167020644 | 167020644 | + |
| 10 | 98133282  | 98133282  | + |
| 10 | 98146654  | 98146654  | + |
| 10 | 98133483  | 98133483  | + |
| 15 | 63092993  | 63092993  | + |
| 2  | 74741767  | 74741767  | + |
| 16 | 69385641  | 69385641  | + |
| 2  | 98382886  | 98382886  | + |
| 7  | 134849213 | 134849213 | + |
| 4  | 83411197  | 83411197  | + |
| X  | 148685623 | 148685623 | + |
| 11 | 61161532  | 61161545  | + |
| 17 | 10618880  | 10618880  | + |
| 4  | 68777054  | 68777054  | + |
| 6  | 138197331 | 138197331 | + |
| 9  | 117668142 | 117668142 | + |
| 7  | 5399044   | 5399044   | + |
| 17 | 38644752  | 38644752  | + |
| 17 | 38640744  | 38640744  | + |
| 15 | 43767774  | 43767774  | + |
| 15 | 43724646  | 43724646  | + |
| 15 | 43730486  | 43730486  | + |
| 18 | 34398914  | 34398914  | + |
| 19 | 16187132  | 16187133  | + |
| 5  | 666323    | 666323    | + |
| 5  | 665280    | 665280    | + |
| 3  | 188925391 | 188925391 | + |
| 19 | 45668327  | 45668327  | + |
| 14 | 39627695  | 39627695  | + |
| 14 | 39623533  | 39623533  | + |
| 6  | 42224546  | 42224546  | + |
| X  | 152728003 | 152728003 | + |
| 6  | 30138662  | 30138662  | + |
| 6  | 28876509  | 28876509  | + |
| 1  | 155148781 | 155148781 | + |
| 1  | 33625275  | 33625275  | + |
| 1  | 231344908 | 231344908 | + |
| 14 | 51475794  | 51475794  | + |

VEP annotated somatic variants

|    |           |           |   |
|----|-----------|-----------|---|
| 14 | 51492135  | 51492136  | + |
| 5  | 14397238  | 14397238  | + |
| 7  | 100465171 | 100465171 | + |
| 19 | 13218417  | 13218417  | + |
| X  | 100265713 | 100265713 | + |
| 20 | 33600740  | 33600740  | + |
| 15 | 31453056  | 31453056  | + |
| 11 | 2438963   | 2438963   | + |
| 15 | 50941131  | 50941131  | + |
| 12 | 110238630 | 110238630 | + |
| 9  | 135786904 | 135786904 | + |
| 9  | 135781563 | 135781563 | + |
| 16 | 2115697   | 2115697   | + |
| 1  | 46641827  | 46641827  | + |
| X  | 99890204  | 99890204  | + |
| X  | 38535174  | 38535174  | + |
| 22 | 19119938  | 19119938  | + |
| 6  | 43221264  | 43221264  | + |
| 6  | 43230970  | 43230970  | + |
| 10 | 75101070  | 75101070  | + |
| 17 | 15930087  | 15930087  | + |
| 22 | 29025743  | 29025743  | + |
| 10 | 134672798 | 134672798 | + |
| 10 | 134756013 | 134756013 | + |
| 10 | 134726470 | 134726470 | + |
| 10 | 134722022 | 134722022 | + |
| 10 | 134650440 | 134650440 | + |
| 22 | 43455531  | 43455531  | + |
| 17 | 46878625  | 46878625  | + |
| 11 | 8122228   | 8122228   | + |
| 15 | 22873325  | 22873325  | + |
| 22 | 50658017  | 50658017  | + |
| 6  | 158870081 | 158870081 | + |
| 6  | 158873376 | 158873376 | + |
| 12 | 44191434  | 44191434  | + |
| 22 | 50964657  | 50964657  | + |
| 21 | 43846729  | 43846729  | + |
| 11 | 122653689 | 122653689 | + |
| 7  | 157000176 | 157000176 | + |
| 1  | 19401296  | 19401296  | + |
| 8  | 59345705  | 59345705  | + |
| 11 | 73715666  | 73715666  | + |
| 19 | 4954454   | 4954454   | + |
| 9  | 6475319   | 6475319   | + |
| 3  | 41957466  | 41957466  | + |
| 21 | 43539523  | 43539523  | + |
| 21 | 43547873  | 43547873  | + |
| 21 | 43541342  | 43541342  | + |
| 17 | 33491278  | 33491278  | + |
| 16 | 1451533   | 1451533   | + |
| 10 | 124436375 | 124436375 | + |
| 22 | 24919627  | 24919627  | + |
| X  | 74519534  | 74519534  | + |
| 1  | 216144049 | 216144049 | + |
| 19 | 17366278  | 17366278  | + |

VEP annotated somatic variants

|    |           |           |   |
|----|-----------|-----------|---|
| 16 | 84793822  | 84793823  | + |
| X  | 47099242  | 47099242  | + |
| 22 | 18649922  | 18649922  | + |
| 9  | 132632653 | 132632653 | + |
| 17 | 20906272  | 20906273  | + |
| 2  | 61570855  | 61570855  | + |
| 5  | 72872766  | 72872766  | + |
| 12 | 101705433 | 101705433 | + |
| 12 | 101715202 | 101715202 | + |
| Y  | 15448300  | 15448300  | + |
| 10 | 17278467  | 17278467  | + |
| 7  | 158823375 | 158823375 | + |
| 2  | 58276115  | 58276115  | + |
| 14 | 68118132  | 68118132  | + |
| 7  | 73115314  | 73115314  | + |
| 7  | 73101137  | 73101137  | + |
| 7  | 73249165  | 73249165  | + |
| 10 | 49929491  | 49929491  | + |
| 10 | 122646113 | 122646113 | + |
| 10 | 122624679 | 122624679 | + |
| 10 | 122659490 | 122659490 | + |
| 10 | 122663585 | 122663585 | + |
| 10 | 122664967 | 122664967 | + |
| 4  | 177093505 | 177093505 | + |
| 1  | 224577604 | 224577604 | + |
| 2  | 29158355  | 29158355  | + |
| 3  | 39093638  | 39093638  | + |
| 7  | 158718805 | 158718805 | + |
| 19 | 38377392  | 38377409  | + |
| 7  | 134878237 | 134878237 | + |
| 7  | 5262385   | 5262385   | + |
| 12 | 863152    | 863152    | + |
| 1  | 113063125 | 113063125 | + |
| 10 | 102222957 | 102222957 | + |
| 6  | 2768905   | 2768905   | + |
| 12 | 118476079 | 118476079 | + |
| 5  | 167868950 | 167868950 | + |
| 16 | 69973297  | 69973297  | + |
| 19 | 7686282   | 7686282   | + |
| 1  | 28293718  | 28293718  | + |
| 10 | 111648006 | 111648006 | + |
| 22 | 41282558  | 41282558  | + |
| 6  | 43496662  | 43496662  | + |
| 19 | 44057227  | 44057227  | + |
| 19 | 44055898  | 44055898  | + |
| 17 | 7192756   | 7192756   | + |
| 1  | 155630752 | 155630752 | + |
| 1  | 155658085 | 155658085 | + |
| 6  | 151686905 | 151686905 | + |
| 6  | 144224312 | 144224312 | + |
| 6  | 149773721 | 149773721 | + |
| 6  | 149772645 | 149772645 | + |
| 6  | 149795692 | 149795692 | + |
| 8  | 144590112 | 144590112 | + |
| 22 | 41739647  | 41739647  | + |

VEP annotated somatic variants

|    |           |           |   |
|----|-----------|-----------|---|
| X  | 103359423 | 103359423 | + |
| 10 | 99211653  | 99211653  | + |
| 10 | 114200355 | 114200355 | + |
| 16 | 85023855  | 85023855  | + |
| 7  | 1195264   | 1195264   | + |
| 14 | 23994517  | 23994517  | + |
| 8  | 106646683 | 106646683 | + |
| 15 | 41106485  | 41106485  | + |
| 7  | 99103607  | 99103607  | + |
| 3  | 50378946  | 50378946  | + |
| 3  | 50380661  | 50380661  | + |
| X  | 152089039 | 152089039 | + |
| X  | 152613112 | 152613112 | + |
| 19 | 57867599  | 57867599  | + |
| 19 | 58982044  | 58982044  | + |
| 10 | 64415031  | 64415031  | + |
| 19 | 8576307   | 8576307   | + |
| 19 | 37617933  | 37617933  | + |
| 19 | 52537576  | 52537576  | + |
| 19 | 11878095  | 11878095  | + |
| X  | 134493747 | 134493747 | + |
| 19 | 21588692  | 21588692  | + |
| 20 | 62594160  | 62594160  | + |
| 15 | 85341859  | 85341859  | + |
| 16 | 2050192   | 2050192   | + |
| 19 | 52521296  | 52521296  | + |
| 19 | 20844340  | 20844341  | + |
| 19 | 22375868  | 22375868  | + |
| 1  | 120166681 | 120166681 | + |
| 19 | 21477431  | 21477431  | + |
| 3  | 75790972  | 75790972  | + |
| X  | 134421168 | 134421168 | + |
| 16 | 30594521  | 30594521  | + |
| 19 | 53453777  | 53453777  | + |
| 14 | 102808330 | 102808330 | + |
| 11 | 60637164  | 60637164  | + |
| 15 | 85149927  | 85149927  | + |
| 19 | 13940959  | 13940959  | + |
| 17 | 3961489   | 3961489   | + |

VEP annotated somatic variants

| Variant_Classification | Variant_Type | Reference_Allele | Tumor_Seq_Allele1 |
|------------------------|--------------|------------------|-------------------|
| Intron                 | INS          | -                | -                 |
| Intron                 | SNP          | T                | T                 |
| Intron                 | SNP          | G                | G                 |
| Silent                 | SNP          | A                | A                 |
| 3'UTR                  | SNP          | C                | C                 |
| Intron                 | SNP          | T                | T                 |
| Intron                 | SNP          | A                | A                 |
| Intron                 | SNP          | A                | A                 |
| Silent                 | SNP          | T                | T                 |
| Intron                 | DEL          | C                | C                 |
| Silent                 | SNP          | C                | C                 |
| 5'UTR                  | INS          | -                | -                 |
| Splice_Region          | SNP          | G                | G                 |
| 5'Flank                | SNP          | T                | T                 |
| Missense_Mutation      | SNP          | C                | C                 |
| Intron                 | SNP          | C                | C                 |
| Intron                 | SNP          | C                | C                 |
| Intron                 | SNP          | C                | C                 |
| Intron                 | SNP          | T                | T                 |
| 5'UTR                  | SNP          | G                | G                 |
| Intron                 | SNP          | G                | G                 |
| Splice_Region          | SNP          | G                | G                 |
| Intron                 | SNP          | G                | G                 |
| Intron                 | SNP          | C                | C                 |
| Intron                 | SNP          | C                | C                 |
| Splice_Region          | SNP          | G                | G                 |
| Missense_Mutation      | SNP          | C                | C                 |
| Intron                 | INS          | -                | -                 |
| Missense_Mutation      | SNP          | C                | C                 |
| Intron                 | SNP          | A                | A                 |
| Intron                 | DEL          | A                | A                 |
| Intron                 | SNP          | C                | C                 |
| Intron                 | SNP          | A                | A                 |
| Intron                 | SNP          | A                | A                 |
| Intron                 | DEL          | TCTGTCTCCCCCTA   | TCTGTCTCCCCCTA    |
| 5'Flank                | SNP          | C                | C                 |
| Silent                 | SNP          | T                | T                 |
| Intron                 | SNP          | T                | T                 |
| Intron                 | SNP          | G                | G                 |
| Intron                 | INS          | -                | -                 |
| Intron                 | SNP          | T                | T                 |
| Silent                 | SNP          | C                | C                 |
| Intron                 | SNP          | T                | T                 |
| Intron                 | SNP          | G                | G                 |
| Silent                 | SNP          | T                | T                 |
| Intron                 | SNP          | C                | C                 |
| Intron                 | SNP          | C                | C                 |
| Missense_Mutation      | SNP          | C                | C                 |
| Silent                 | SNP          | C                | C                 |
| Intron                 | SNP          | T                | T                 |
| Splice_Region          | SNP          | C                | C                 |
| Intron                 | SNP          | C                | C                 |
| Intron                 | SNP          | C                | C                 |
| Intron                 | SNP          | C                | C                 |

VEP annotated somatic variants

|                   |     |       |       |
|-------------------|-----|-------|-------|
| Intron            | SNP | G     | G     |
| Intron            | SNP | T     | T     |
| Intron            | SNP | C     | C     |
| 5'UTR             | SNP | A     | A     |
| Intron            | SNP | C     | C     |
| Intron            | SNP | T     | T     |
| Intron            | SNP | A     | A     |
| Silent            | SNP | C     | C     |
| Intron            | SNP | T     | T     |
| Intron            | DEL | TTTTT | TTTTT |
| Intron            | SNP | G     | G     |
| Intron            | SNP | G     | G     |
| Missense_Mutation | SNP | T     | T     |
| Intron            | SNP | T     | T     |
| Splice_Region     | SNP | A     | A     |
| Silent            | SNP | G     | G     |
| Intron            | SNP | C     | C     |
| Intron            | SNP | C     | C     |
| Intron            | SNP | T     | T     |
| 5'UTR             | SNP | C     | C     |
| Intron            | SNP | T     | T     |
| Intron            | SNP | G     | G     |
| Intron            | SNP | C     | C     |
| Missense_Mutation | SNP | G     | G     |
| Intron            | SNP | C     | C     |
| Intron            | SNP | G     | G     |
| Missense_Mutation | SNP | T     | T     |
| 5'UTR             | SNP | A     | A     |
| Intron            | SNP | A     | A     |
| Missense_Mutation | SNP | G     | G     |
| Intron            | DEL | GG    | GG    |
| Missense_Mutation | SNP | A     | A     |
| Intron            | SNP | A     | A     |
| Intron            | SNP | T     | T     |
| Silent            | SNP | C     | C     |
| Intron            | SNP | C     | C     |
| Intron            | SNP | G     | G     |
| 5'Flank           | SNP | C     | C     |
| Missense_Mutation | SNP | A     | A     |
| Silent            | SNP | T     | T     |
| Intron            | SNP | A     | A     |
| Splice_Region     | SNP | G     | G     |
| Intron            | SNP | C     | C     |
| 5'UTR             | SNP | C     | C     |
| Missense_Mutation | SNP | A     | A     |
| 5'Flank           | SNP | G     | G     |
| Silent            | SNP | C     | C     |
| Intron            | SNP | A     | A     |
| Intron            | SNP | C     | C     |
| Splice_Region     | SNP | G     | G     |
| Missense_Mutation | SNP | C     | C     |
| Intron            | SNP | T     | T     |
| Intron            | SNP | C     | C     |
| Intron            | SNP | A     | A     |
| Intron            | DEL | T     | T     |

VEP annotated somatic variants

|                   |     |   |   |
|-------------------|-----|---|---|
| 5'UTR             | SNP | G | G |
| Intron            | SNP | G | G |
| Intron            | SNP | C | C |
| Intron            | SNP | G | G |
| Intron            | SNP | A | A |
| Intron            | SNP | G | G |
| Intron            | SNP | G | G |
| Intron            | SNP | A | A |
| Intron            | SNP | A | A |
| Intron            | SNP | G | G |
| 3'UTR             | SNP | G | G |
| Silent            | SNP | G | G |
| Silent            | SNP | C | C |
| Intron            | SNP | C | C |
| Intron            | SNP | C | C |
| Intron            | SNP | G | G |
| Intron            | SNP | C | C |
| Intron            | SNP | T | T |
| Intron            | SNP | G | G |
| Intron            | SNP | G | G |
| Intron            | SNP | A | A |
| Intron            | SNP | C | C |
| Intron            | SNP | C | C |
| Splice_Region     | SNP | A | A |
| Missense_Mutation | SNP | A | A |
| Intron            | INS | - | - |
| Missense_Mutation | SNP | G | G |
| Intron            | SNP | C | C |
| Intron            | SNP | G | G |
| Missense_Mutation | SNP | G | G |
| 5'UTR             | SNP | T | T |
| Intron            | SNP | T | T |
| Intron            | SNP | C | C |
| Intron            | SNP | G | G |
| Splice_Site       | SNP | T | T |
| Intron            | SNP | G | G |
| Missense_Mutation | SNP | A | A |
| Intron            | SNP | A | A |
| Intron            | SNP | G | G |
| Intron            | SNP | G | G |
| Intron            | SNP | C | C |
| Intron            | SNP | C | C |
| Intron            | SNP | G | G |
| Intron            | SNP | C | C |
| Intron            | SNP | C | C |
| Silent            | SNP | G | G |
| Intron            | SNP | A | A |
| Intron            | SNP | T | T |
| Intron            | SNP | C | C |
| Intron            | SNP | G | G |
| Missense_Mutation | SNP | G | G |
| Intron            | SNP | T | T |
| Intron            | SNP | C | C |
| Silent            | SNP | G | G |
| Intron            | SNP | A | A |

VEP annotated somatic variants

|                   |     |            |            |
|-------------------|-----|------------|------------|
| 5'Flank           | INS | -          | -          |
| Silent            | SNP | T          | T          |
| Intron            | SNP | G          | G          |
| Intron            | SNP | G          | G          |
| Missense_Mutation | SNP | T          | T          |
| Intron            | SNP | C          | C          |
| Frame_Shift_Del   | DEL | TA         | TA         |
| Intron            | DEL | GAGA       | GAGA       |
| 3'Flank           | SNP | G          | G          |
| 3'UTR             | SNP | T          | T          |
| Missense_Mutation | SNP | T          | T          |
| 5'UTR             | SNP | T          | T          |
| Missense_Mutation | SNP | A          | A          |
| Silent            | SNP | A          | A          |
| Intron            | DEL | TAAT       | TAAT       |
| Intron            | SNP | T          | T          |
| Splice_Region     | SNP | G          | G          |
| Intron            | SNP | T          | T          |
| 3'UTR             | SNP | G          | G          |
| Intron            | SNP | T          | T          |
| Intron            | SNP | G          | G          |
| Intron            | SNP | C          | C          |
| Intron            | SNP | A          | A          |
| Intron            | SNP | G          | G          |
| 5'UTR             | SNP | T          | T          |
| Intron            | SNP | C          | C          |
| Intron            | SNP | A          | A          |
| Silent            | SNP | G          | G          |
| Missense_Mutation | SNP | C          | C          |
| Intron            | DEL | ACACAC     | ACACAC     |
| Splice_Region     | SNP | A          | A          |
| Intron            | SNP | C          | C          |
| Intron            | SNP | C          | C          |
| Intron            | SNP | C          | C          |
| Intron            | SNP | T          | T          |
| Intron            | SNP | G          | G          |
| Intron            | SNP | C          | C          |
| 5'UTR             | SNP | G          | G          |
| 3'UTR             | SNP | G          | G          |
| Intron            | SNP | G          | G          |
| Intron            | SNP | C          | C          |
| Silent            | SNP | C          | C          |
| Intron            | SNP | C          | C          |
| Intron            | SNP | C          | C          |
| Intron            | SNP | C          | C          |
| Intron            | SNP | C          | C          |
| Intron            | SNP | T          | T          |
| Intron            | SNP | G          | G          |
| 3'UTR             | SNP | C          | C          |
| Intron            | SNP | G          | G          |
| Intron            | SNP | G          | G          |
| Intron            | SNP | C          | C          |
| Silent            | SNP | C          | C          |
| Silent            | SNP | C          | C          |
| Intron            | DEL | ATATGAATAC | ATATGAATAC |
| Missense_Mutation | SNP | G          | G          |



VEP annotated somatic variants

|                   |     |                                    |   |
|-------------------|-----|------------------------------------|---|
| Intron            | SNP | T                                  | T |
| 3'UTR             | SNP | G                                  | G |
| 3'UTR             | SNP | A                                  | A |
| Intron            | SNP | T                                  | T |
| Silent            | SNP | A                                  | A |
| Missense_Mutation | SNP | T                                  | T |
| Intron            | SNP | C                                  | C |
| Intron            | SNP | G                                  | G |
| Silent            | SNP | G                                  | G |
| Intron            | SNP | G                                  | G |
| Intron            | SNP | G                                  | G |
| Intron            | SNP | C                                  | C |
| Intron            | SNP | G                                  | G |
| Missense_Mutation | SNP | A                                  | A |
| Frame_Shift_Del   | DEL | T                                  | T |
| Intron            | SNP | A                                  | A |
| Intron            | DEL | T                                  | T |
| Missense_Mutation | SNP | A                                  | A |
| Intron            | SNP | A                                  | A |
| In_Frame_Del      | DEL | .GGGCAGAGGCTGCTG(.GGGCAGAGGCTGCTG) |   |
| 5'Flank           | SNP | C                                  | C |
| Intron            | SNP | T                                  | T |
| Intron            | SNP | G                                  | G |
| Missense_Mutation | SNP | T                                  | T |
| Intron            | SNP | C                                  | C |
| Intron            | SNP | G                                  | G |
| Intron            | SNP | C                                  | C |
| Intron            | SNP | A                                  | A |
| Silent            | SNP | A                                  | A |
| Intron            | SNP | C                                  | C |
| Intron            | SNP | C                                  | C |
| Intron            | SNP | G                                  | G |
| 5'UTR             | SNP | A                                  | A |
| Intron            | SNP | G                                  | G |
| Intron            | INS | -                                  | - |
| Intron            | SNP | C                                  | C |
| Intron            | SNP | A                                  | A |
| Missense_Mutation | SNP | G                                  | G |
| Intron            | SNP | T                                  | T |
| Silent            | SNP | T                                  | T |
| Intron            | DEL | A                                  | A |
| Missense_Mutation | SNP | G                                  | G |
| Intron            | SNP | C                                  | C |
| Intron            | SNP | T                                  | T |
| Intron            | SNP | T                                  | T |
| Intron            | SNP | C                                  | C |
| Missense_Mutation | SNP | C                                  | C |
| Intron            | SNP | A                                  | A |
| Intron            | SNP | A                                  | A |
| Intron            | SNP | T                                  | T |
| Missense_Mutation | SNP | C                                  | C |
| Silent            | SNP | G                                  | G |
| 5'UTR             | SNP | T                                  | T |
| Silent            | SNP | G                                  | G |
| Intron            | SNP | G                                  | G |

VEP annotated somatic variants

|                   |     |     |     |
|-------------------|-----|-----|-----|
| Intron            | SNP | T   | T   |
| Missense_Mutation | SNP | C   | C   |
| 3'UTR             | SNP | T   | T   |
| 3'UTR             | SNP | G   | G   |
| Intron            | SNP | C   | C   |
| Silent            | SNP | G   | G   |
| Intron            | SNP | G   | G   |
| Missense_Mutation | SNP | G   | G   |
| Intron            | SNP | T   | T   |
| Intron            | SNP | C   | C   |
| Intron            | SNP | G   | G   |
| 3'UTR             | SNP | C   | C   |
| 5'UTR             | SNP | T   | T   |
| 3'UTR             | SNP | T   | T   |
| Splice_Site       | SNP | G   | G   |
| Intron            | SNP | C   | C   |
| Intron            | SNP | G   | G   |
| Intron            | SNP | G   | G   |
| Intron            | SNP | G   | G   |
| Silent            | SNP | G   | G   |
| Intron            | SNP | A   | A   |
| Silent            | SNP | C   | C   |
| Intron            | SNP | C   | C   |
| Intron            | SNP | A   | A   |
| Splice_Region     | SNP | A   | A   |
| Intron            | SNP | T   | T   |
| Silent            | SNP | C   | C   |
| Intron            | SNP | A   | A   |
| Intron            | SNP | A   | A   |
| Intron            | INS | -   | -   |
| Intron            | SNP | C   | C   |
| Intron            | SNP | T   | T   |
| Intron            | SNP | T   | T   |
| Missense_Mutation | SNP | G   | G   |
| Intron            | SNP | T   | T   |
| Intron            | SNP | G   | G   |
| Intron            | SNP | T   | T   |
| Intron            | DEL | TTG | TTG |
| Silent            | SNP | C   | C   |
| Intron            | SNP | A   | A   |
| Intron            | SNP | G   | G   |
| Intron            | SNP | C   | C   |
| 3'UTR             | SNP | C   | C   |
| Missense_Mutation | SNP | A   | A   |
| Intron            | SNP | G   | G   |
| Intron            | SNP | A   | A   |
| Intron            | SNP | G   | G   |
| Intron            | SNP | C   | C   |
| Silent            | SNP | G   | G   |
| Intron            | INS | -   | -   |
| Intron            | SNP | A   | A   |
| Intron            | SNP | A   | A   |
| 5'UTR             | SNP | C   | C   |
| 5'UTR             | SNP | C   | C   |
| Intron            | SNP | A   | A   |

VEP annotated somatic variants

|                   |     |      |      |
|-------------------|-----|------|------|
| Silent            | SNP | A    | A    |
| Intron            | SNP | G    | G    |
| Silent            | SNP | C    | C    |
| Intron            | SNP | T    | T    |
| Silent            | SNP | C    | C    |
| Silent            | SNP | G    | G    |
| Intron            | SNP | A    | A    |
| Missense_Mutation | SNP | A    | A    |
| Intron            | SNP | C    | C    |
| Missense_Mutation | SNP | G    | G    |
| Intron            | SNP | A    | A    |
| Silent            | SNP | C    | C    |
| Missense_Mutation | SNP | G    | G    |
| 5'UTR             | SNP | C    | C    |
| Intron            | SNP | C    | C    |
| Intron            | SNP | G    | G    |
| Intron            | SNP | T    | T    |
| Intron            | SNP | C    | C    |
| Intron            | DEL | AA   | AA   |
| Missense_Mutation | SNP | C    | C    |
| Intron            | SNP | C    | C    |
| Silent            | SNP | G    | G    |
| Intron            | SNP | T    | T    |
| Intron            | SNP | A    | A    |
| Intron            | SNP | A    | A    |
| Silent            | SNP | T    | T    |
| Intron            | SNP | G    | G    |
| Intron            | SNP | A    | A    |
| Silent            | SNP | G    | G    |
| 5'UTR             | SNP | C    | C    |
| Silent            | SNP | A    | A    |
| Intron            | SNP | T    | T    |
| Intron            | SNP | T    | T    |
| Intron            | SNP | G    | G    |
| Intron            | SNP | A    | A    |
| Missense_Mutation | SNP | C    | C    |
| Intron            | SNP | G    | G    |
| Intron            | SNP | G    | G    |
| Intron            | SNP | G    | G    |
| Intron            | SNP | C    | C    |
| Intron            | INS | -    | -    |
| Intron            | SNP | C    | C    |
| 3'Flank           | SNP | T    | T    |
| Intron            | SNP | A    | A    |
| Intron            | SNP | G    | G    |
| Intron            | SNP | T    | T    |
| Intron            | SNP | G    | G    |
| 3'UTR             | DEL | TCAC | TCAC |
| 3'UTR             | SNP | A    | A    |
| Intron            | SNP | C    | C    |
| Intron            | SNP | G    | G    |
| Intron            | SNP | A    | A    |
| Intron            | SNP | A    | A    |
| Intron            | SNP | G    | G    |
| Intron            | SNP | C    | C    |

VEP annotated somatic variants

|                   |     |      |      |
|-------------------|-----|------|------|
| Intron            | SNP | C    | C    |
| Intron            | SNP | A    | A    |
| Intron            | SNP | T    | T    |
| Intron            | SNP | A    | A    |
| Intron            | SNP | C    | C    |
| Intron            | SNP | T    | T    |
| Intron            | SNP | A    | A    |
| Intron            | SNP | T    | T    |
| Intron            | SNP | A    | A    |
| Intron            | SNP | G    | G    |
| Intron            | SNP | T    | T    |
| Intron            | SNP | T    | T    |
| Splice_Region     | SNP | T    | T    |
| Intron            | SNP | G    | G    |
| Intron            | DEL | G    | G    |
| Intron            | SNP | C    | C    |
| Intron            | SNP | C    | C    |
| Silent            | SNP | G    | G    |
| Missense_Mutation | SNP | G    | G    |
| Intron            | SNP | A    | A    |
| Intron            | SNP | C    | C    |
| Splice_Region     | SNP | C    | C    |
| Splice_Region     | SNP | C    | C    |
| Intron            | SNP | C    | C    |
| Intron            | SNP | G    | G    |
| Intron            | SNP | G    | G    |
| Intron            | SNP | G    | G    |
| Intron            | DEL | TATT | TATT |
| Silent            | SNP | C    | C    |
| Silent            | SNP | C    | C    |
| Intron            | SNP | C    | C    |
| Intron            | SNP | T    | T    |
| Intron            | SNP | G    | G    |
| Intron            | SNP | A    | A    |
| Intron            | SNP | T    | T    |
| Silent            | SNP | G    | G    |
| 5'UTR             | SNP | G    | G    |
| Missense_Mutation | SNP | A    | A    |
| Intron            | SNP | G    | G    |
| Intron            | SNP | T    | T    |
| 5'UTR             | SNP | A    | A    |
| Missense_Mutation | SNP | G    | G    |
| Missense_Mutation | SNP | G    | G    |
| Intron            | SNP | C    | C    |
| Intron            | SNP | C    | C    |
| Intron            | SNP | C    | C    |
| Intron            | SNP | C    | C    |
| Intron            | SNP | G    | G    |
| Intron            | SNP | A    | A    |
| Intron            | SNP | G    | G    |
| Intron            | SNP | T    | T    |
| Intron            | INS | -    | -    |
| Intron            | SNP | A    | A    |
| Intron            | DEL | TCTC | TCTC |
| Intron            | SNP | C    | C    |

VEP annotated somatic variants

|                   |     |   |   |
|-------------------|-----|---|---|
| Silent            | SNP | C | C |
| Intron            | SNP | G | G |
| Intron            | SNP | A | A |
| Silent            | SNP | C | C |
| Silent            | SNP | C | C |
| Silent            | SNP | G | G |
| Silent            | SNP | G | G |
| Silent            | SNP | A | A |
| Intron            | SNP | C | C |
| Splice_Region     | SNP | G | G |
| Missense_Mutation | SNP | C | C |
| Intron            | SNP | A | A |
| Intron            | SNP | A | A |
| Missense_Mutation | SNP | T | T |
| Intron            | SNP | G | G |
| Intron            | SNP | A | A |
| Silent            | SNP | C | C |
| Intron            | SNP | A | A |
| Intron            | SNP | C | C |
| Intron            | SNP | T | T |
| 3'Flank           | SNP | C | C |
| Intron            | SNP | C | C |
| Intron            | SNP | G | G |
| Missense_Mutation | SNP | A | A |
| Silent            | SNP | C | C |
| Intron            | SNP | C | C |
| Intron            | SNP | A | A |
| Missense_Mutation | SNP | G | G |
| Missense_Mutation | SNP | G | G |
| Missense_Mutation | SNP | G | G |
| Silent            | SNP | C | C |
| Intron            | SNP | C | C |
| Intron            | SNP | C | C |
| Intron            | SNP | C | C |
| Intron            | SNP | A | A |
| Silent            | SNP | C | C |
| Intron            | SNP | T | T |
| Missense_Mutation | SNP | G | G |
| Intron            | SNP | G | G |
| Intron            | SNP | T | T |
| Missense_Mutation | SNP | G | G |
| Intron            | SNP | C | C |
| Missense_Mutation | SNP | G | G |
| Intron            | SNP | T | T |
| Intron            | SNP | C | C |
| Intron            | SNP | C | C |
| Intron            | SNP | T | T |
| Missense_Mutation | SNP | G | G |
| Intron            | INS | - | - |
| Intron            | INS | - | - |
| 3'UTR             | SNP | G | G |
| 3'UTR             | SNP | G | G |
| Intron            | SNP | T | T |
| Silent            | SNP | G | G |
| Intron            | SNP | G | G |

VEP annotated somatic variants

|                   |     |        |        |
|-------------------|-----|--------|--------|
| 3'UTR             | SNP | C      | C      |
| Intron            | SNP | T      | T      |
| Intron            | SNP | C      | C      |
| 5'Flank           | SNP | A      | A      |
| Intron            | SNP | C      | C      |
| 5'UTR             | SNP | C      | C      |
| Intron            | SNP | G      | G      |
| Silent            | SNP | A      | A      |
| Missense_Mutation | SNP | C      | C      |
| Intron            | SNP | G      | G      |
| Intron            | SNP | A      | A      |
| Intron            | SNP | A      | A      |
| Silent            | SNP | A      | A      |
| 3'UTR             | SNP | T      | T      |
| Intron            | SNP | T      | T      |
| Intron            | SNP | C      | C      |
| Silent            | SNP | G      | G      |
| Intron            | SNP | G      | G      |
| Intron            | SNP | G      | G      |
| 5'Flank           | SNP | C      | C      |
| Missense_Mutation | SNP | C      | C      |
| Missense_Mutation | SNP | G      | G      |
| Intron            | SNP | G      | G      |
| RNA               | SNP | G      | G      |
| Intron            | SNP | G      | G      |
| Intron            | SNP | A      | A      |
| Intron            | SNP | G      | G      |
| Intron            | SNP | G      | G      |
| Intron            | SNP | G      | G      |
| Intron            | SNP | C      | C      |
| Silent            | SNP | G      | G      |
| Missense_Mutation | SNP | G      | G      |
| 3'UTR             | SNP | G      | G      |
| Intron            | SNP | T      | T      |
| Silent            | SNP | C      | C      |
| Intron            | SNP | C      | C      |
| Intron            | SNP | G      | G      |
| Intron            | INS | -      | -      |
| Silent            | SNP | G      | G      |
| Intron            | SNP | G      | G      |
| Missense_Mutation | SNP | G      | G      |
| Intron            | SNP | A      | A      |
| Intron            | INS | -      | -      |
| Intron            | SNP | T      | T      |
| Intron            | SNP | G      | G      |
| Silent            | SNP | C      | C      |
| In_Frame_Del      | DEL | GGTGGT | GGTGGT |
| Intron            | SNP | C      | C      |
| Intron            | SNP | C      | C      |
| Silent            | SNP | C      | C      |
| Silent            | SNP | T      | T      |
| Intron            | SNP | G      | G      |
| 3'UTR             | SNP | T      | T      |
| Silent            | SNP | T      | T      |
| Intron            | SNP | C      | C      |

VEP annotated somatic variants

|                   |     |   |   |
|-------------------|-----|---|---|
| Silent            | SNP | C | C |
| Intron            | SNP | G | G |
| Intron            | SNP | A | A |
| Silent            | SNP | G | G |
| Intron            | SNP | C | C |
| Intron            | SNP | T | T |
| Intron            | SNP | G | G |
| Silent            | SNP | C | C |
| Intron            | SNP | T | T |
| Splice_Region     | SNP | A | A |
| Intron            | SNP | T | T |
| Intron            | SNP | T | T |
| Intron            | SNP | C | C |
| Intron            | SNP | C | C |
| Intron            | DEL | G | G |
| Intron            | SNP | G | G |
| 5'Flank           | SNP | A | A |
| Intron            | SNP | C | C |
| Intron            | SNP | A | A |
| Missense_Mutation | SNP | G | G |
| Missense_Mutation | SNP | T | T |
| Missense_Mutation | SNP | G | G |
| Silent            | SNP | T | T |
| Missense_Mutation | SNP | G | G |
| 3'UTR             | INS | - | - |
| 5'UTR             | SNP | G | G |
| Intron            | SNP | G | G |
| Intron            | SNP | A | A |
| Silent            | SNP | G | G |
| Silent            | SNP | C | C |
| Intron            | SNP | A | A |
| Splice_Region     | SNP | A | A |
| Intron            | SNP | C | C |
| Intron            | SNP | T | T |
| Intron            | SNP | A | A |
| Intron            | SNP | A | A |
| Intron            | SNP | C | C |
| Missense_Mutation | SNP | C | C |
| Missense_Mutation | SNP | G | G |
| Missense_Mutation | SNP | G | G |
| Intron            | SNP | G | G |
| Missense_Mutation | SNP | G | G |
| Silent            | SNP | G | G |
| Intron            | SNP | T | T |
| Intron            | SNP | G | G |
| 5'UTR             | SNP | G | G |
| Missense_Mutation | SNP | T | T |
| Intron            | SNP | T | T |
| Intron            | SNP | G | G |
| Intron            | SNP | T | T |
| Intron            | SNP | A | A |
| Silent            | SNP | C | C |
| Missense_Mutation | SNP | C | C |
| Silent            | SNP | G | G |
| Silent            | SNP | G | G |

VEP annotated somatic variants

|                   |     |    |    |
|-------------------|-----|----|----|
| Splice_Region     | SNP | T  | T  |
| Silent            | SNP | G  | G  |
| Intron            | SNP | A  | A  |
| Intron            | DEL | CG | CG |
| Silent            | SNP | G  | G  |
| Missense_Mutation | SNP | C  | C  |
| Missense_Mutation | SNP | G  | G  |
| 5'UTR             | SNP | C  | C  |
| Intron            | SNP | G  | G  |
| Intron            | SNP | G  | G  |
| Intron            | SNP | C  | C  |
| Silent            | SNP | T  | T  |
| Intron            | SNP | T  | T  |
| Intron            | SNP | C  | C  |
| Intron            | SNP | G  | G  |
| Intron            | SNP | G  | G  |
| Intron            | SNP | T  | T  |
| 5'Flank           | SNP | G  | G  |
| Intron            | SNP | G  | G  |
| Intron            | SNP | T  | T  |
| Silent            | SNP | C  | C  |
| Intron            | SNP | G  | G  |
| Missense_Mutation | SNP | C  | C  |
| 5'UTR             | SNP | C  | C  |
| Intron            | SNP | C  | C  |
| Intron            | SNP | C  | C  |
| Intron            | SNP | C  | C  |
| 3'UTR             | SNP | G  | G  |
| Intron            | SNP | G  | G  |
| 3'UTR             | SNP | C  | C  |
| Intron            | SNP | T  | T  |
| Intron            | SNP | G  | G  |
| Intron            | SNP | A  | A  |
| Intron            | SNP | T  | T  |
| Intron            | SNP | C  | C  |
| Intron            | SNP | G  | G  |
| Silent            | SNP | C  | C  |
| Intron            | SNP | G  | G  |
| Intron            | SNP | G  | G  |
| Silent            | SNP | C  | C  |
| Missense_Mutation | SNP | T  | T  |
| Intron            | SNP | T  | T  |
| Intron            | SNP | T  | T  |
| Intron            | SNP | A  | A  |
| Intron            | SNP | T  | T  |
| Intron            | SNP | C  | C  |
| Intron            | SNP | C  | C  |
| Missense_Mutation | SNP | C  | C  |
| Silent            | SNP | C  | C  |
| Intron            | SNP | G  | G  |
| Intron            | SNP | G  | G  |
| Silent            | SNP | C  | C  |
| Intron            | SNP | C  | C  |
| 3'UTR             | SNP | C  | C  |
| Intron            | SNP | C  | C  |



VEP annotated somatic variants

|                   |     |      |      |
|-------------------|-----|------|------|
| Silent            | SNP | G    | G    |
| Intron            | DEL | C    | C    |
| Missense_Mutation | SNP | C    | C    |
| Intron            | SNP | C    | C    |
| Intron            | DEL | TTT  | TTT  |
| Silent            | SNP | G    | G    |
| Intron            | SNP | G    | G    |
| Missense_Mutation | SNP | G    | G    |
| Intron            | SNP | T    | T    |
| Intron            | SNP | G    | G    |
| Silent            | SNP | C    | C    |
| Intron            | INS | -    | -    |
| Silent            | SNP | G    | G    |
| Splice_Region     | SNP | G    | G    |
| Silent            | SNP | T    | T    |
| Silent            | SNP | T    | T    |
| Missense_Mutation | SNP | C    | C    |
| Missense_Mutation | SNP | C    | C    |
| Intron            | SNP | A    | A    |
| 3'UTR             | SNP | A    | A    |
| Intron            | SNP | G    | G    |
| Intron            | SNP | A    | A    |
| Missense_Mutation | SNP | G    | G    |
| Missense_Mutation | SNP | T    | T    |
| Intron            | SNP | A    | A    |
| Intron            | SNP | T    | T    |
| Splice_Region     | SNP | T    | T    |
| Intron            | SNP | G    | G    |
| Intron            | SNP | C    | C    |
| Silent            | SNP | T    | T    |
| Silent            | SNP | A    | A    |
| Intron            | SNP | G    | G    |
| Intron            | SNP | G    | G    |
| Missense_Mutation | SNP | C    | C    |
| Intron            | SNP | A    | A    |
| Splice_Region     | SNP | T    | T    |
| Intron            | DEL | GCCT | GCCT |
| Silent            | SNP | C    | C    |
| Intron            | DEL | GG   | GG   |
| Missense_Mutation | SNP | G    | G    |
| Intron            | SNP | C    | C    |
| 3'UTR             | SNP | C    | C    |
| 3'UTR             | SNP | A    | A    |
| 3'UTR             | SNP | G    | G    |
| Intron            | SNP | A    | A    |
| Silent            | SNP | C    | C    |
| Intron            | SNP | T    | T    |
| Intron            | SNP | G    | G    |
| Intron            | SNP | T    | T    |
| Intron            | SNP | G    | G    |
| Intron            | SNP | A    | A    |
| Intron            | DEL | C    | C    |
| Intron            | SNP | C    | C    |
| Intron            | SNP | C    | C    |
| Silent            | SNP | G    | G    |

VEP annotated somatic variants

|                   |     |          |          |
|-------------------|-----|----------|----------|
| Intron            | SNP | A        | A        |
| Intron            | SNP | T        | T        |
| Intron            | SNP | T        | T        |
| Intron            | SNP | G        | G        |
| Intron            | SNP | T        | T        |
| Silent            | SNP | C        | C        |
| Intron            | SNP | T        | T        |
| Intron            | SNP | A        | A        |
| Intron            | SNP | T        | T        |
| Intron            | SNP | C        | C        |
| Intron            | INS | -        | -        |
| Splice_Region     | SNP | C        | C        |
| Silent            | SNP | G        | G        |
| Intron            | SNP | G        | G        |
| Intron            | SNP | G        | G        |
| Intron            | SNP | C        | C        |
| Intron            | SNP | G        | G        |
| Intron            | SNP | A        | A        |
| Intron            | SNP | G        | G        |
| Intron            | SNP | C        | C        |
| Silent            | SNP | C        | C        |
| 3'UTR             | DEL | TT       | TT       |
| 3'UTR             | SNP | C        | C        |
| Intron            | SNP | A        | A        |
| Silent            | SNP | G        | G        |
| Silent            | SNP | G        | G        |
| Silent            | SNP | C        | C        |
| Missense_Mutation | SNP | G        | G        |
| Intron            | SNP | C        | C        |
| Intron            | SNP | G        | G        |
| Intron            | SNP | C        | C        |
| Intron            | SNP | G        | G        |
| 5'UTR             | SNP | G        | G        |
| Intron            | SNP | G        | G        |
| Intron            | SNP | G        | G        |
| Intron            | SNP | C        | C        |
| Intron            | SNP | G        | G        |
| Missense_Mutation | SNP | C        | C        |
| Intron            | SNP | C        | C        |
| Silent            | SNP | T        | T        |
| Missense_Mutation | SNP | G        | G        |
| Silent            | SNP | G        | G        |
| Intron            | SNP | C        | C        |
| Missense_Mutation | SNP | T        | T        |
| Intron            | DEL | ACACACAC | ACACACAC |
| Silent            | SNP | G        | G        |
| Intron            | SNP | T        | T        |
| Intron            | SNP | C        | C        |
| Silent            | SNP | G        | G        |
| Intron            | SNP | C        | C        |
| Intron            | INS | -        | -        |
| Intron            | SNP | C        | C        |
| Intron            | DEL | CT       | CT       |
| Intron            | SNP | A        | A        |
| Intron            | SNP | T        | T        |

VEP annotated somatic variants

|                   |     |   |   |
|-------------------|-----|---|---|
| Silent            | SNP | T | T |
| Splice_Region     | SNP | A | A |
| Intron            | SNP | T | T |
| Intron            | SNP | T | T |
| Intron            | SNP | T | T |
| Intron            | SNP | C | C |
| Splice_Region     | SNP | A | A |
| Silent            | SNP | C | C |
| Intron            | SNP | G | G |
| Intron            | SNP | C | C |
| Intron            | SNP | G | G |
| Intron            | SNP | G | G |
| 3'UTR             | SNP | T | T |
| 3'UTR             | SNP | T | T |
| 3'UTR             | SNP | T | T |
| Silent            | SNP | A | A |
| Intron            | SNP | C | C |
| Intron            | DEL | C | C |
| Intron            | SNP | A | A |
| Intron            | SNP | G | G |
| Intron            | SNP | G | G |
| Intron            | SNP | G | G |
| Intron            | SNP | T | T |
| Intron            | SNP | G | G |
| 5'UTR             | SNP | C | C |
| Silent            | SNP | A | A |
| 5'UTR             | SNP | G | G |
| Intron            | INS | - | - |
| Intron            | SNP | G | G |
| Intron            | SNP | G | G |
| Intron            | SNP | C | C |
| Intron            | SNP | C | C |
| Intron            | SNP | G | G |
| Missense_Mutation | SNP | C | C |
| Intron            | SNP | C | C |
| Intron            | SNP | G | G |
| Intron            | SNP | T | T |
| Intron            | DEL | T | T |
| Silent            | SNP | T | T |
| Intron            | SNP | A | A |
| Intron            | SNP | T | T |
| Intron            | SNP | A | A |
| Intron            | SNP | T | T |
| Intron            | SNP | C | C |
| Intron            | SNP | C | C |
| Missense_Mutation | SNP | G | G |
| Intron            | SNP | G | G |
| Intron            | SNP | T | T |
| Intron            | SNP | A | A |
| Missense_Mutation | SNP | C | C |
| 3'UTR             | SNP | A | A |
| Intron            | SNP | T | T |
| Missense_Mutation | SNP | A | A |
| Missense_Mutation | SNP | G | G |
| 3'UTR             | SNP | A | A |

VEP annotated somatic variants

|                   |     |     |     |
|-------------------|-----|-----|-----|
| Intron            | SNP | C   | C   |
| Intron            | SNP | G   | G   |
| Intron            | SNP | T   | T   |
| Intron            | SNP | G   | G   |
| 5'UTR             | SNP | C   | C   |
| 3'Flank           | SNP | T   | T   |
| 5'UTR             | SNP | C   | C   |
| Intron            | SNP | G   | G   |
| Intron            | SNP | T   | T   |
| Intron            | SNP | G   | G   |
| Silent            | SNP | T   | T   |
| 5'UTR             | SNP | C   | C   |
| Intron            | SNP | T   | T   |
| Silent            | SNP | C   | C   |
| Intron            | SNP | C   | C   |
| Intron            | SNP | G   | G   |
| Silent            | SNP | C   | C   |
| Intron            | SNP | C   | C   |
| Silent            | SNP | T   | T   |
| Missense_Mutation | SNP | A   | A   |
| Missense_Mutation | SNP | C   | C   |
| Missense_Mutation | SNP | C   | C   |
| Intron            | SNP | C   | C   |
| Silent            | SNP | A   | A   |
| Intron            | SNP | A   | A   |
| Intron            | DEL | GGG | GGG |
| Intron            | SNP | T   | T   |
| Splice_Region     | SNP | T   | T   |
| 5'UTR             | SNP | C   | C   |
| Missense_Mutation | SNP | G   | G   |
| Intron            | SNP | A   | A   |
| Intron            | SNP | G   | G   |
| Silent            | SNP | C   | C   |
| Intron            | SNP | C   | C   |
| Intron            | SNP | C   | C   |
| Silent            | SNP | G   | G   |
| Intron            | SNP | C   | C   |
| 5'UTR             | SNP | T   | T   |
| Intron            | SNP | T   | T   |
| Missense_Mutation | SNP | G   | G   |
| Intron            | SNP | C   | C   |
| Intron            | SNP | G   | G   |
| Intron            | SNP | A   | A   |
| 3'UTR             | INS | -   | -   |
| Intron            | SNP | C   | C   |
| Silent            | SNP | C   | C   |
| Intron            | SNP | G   | G   |
| Silent            | SNP | G   | G   |
| Intron            | SNP | G   | G   |
| Silent            | SNP | C   | C   |
| Missense_Mutation | SNP | C   | C   |
| Intron            | SNP | T   | T   |
| Intron            | SNP | G   | G   |
| Intron            | SNP | A   | A   |
| Intron            | SNP | C   | C   |

VEP annotated somatic variants

|                   |     |      |      |
|-------------------|-----|------|------|
| Intron            | SNP | A    | A    |
| Intron            | SNP | T    | T    |
| Intron            | SNP | C    | C    |
| Intron            | SNP | A    | A    |
| Intron            | SNP | C    | C    |
| Intron            | SNP | G    | G    |
| Intron            | SNP | C    | C    |
| Missense_Mutation | SNP | T    | T    |
| Intron            | SNP | C    | C    |
| Missense_Mutation | SNP | G    | G    |
| Intron            | SNP | C    | C    |
| Intron            | SNP | G    | G    |
| Intron            | SNP | C    | C    |
| Missense_Mutation | SNP | T    | T    |
| Missense_Mutation | SNP | A    | A    |
| Missense_Mutation | SNP | T    | T    |
| Intron            | SNP | A    | A    |
| Intron            | SNP | G    | G    |
| Intron            | SNP | G    | G    |
| Intron            | SNP | C    | C    |
| Splice_Region     | SNP | C    | C    |
| Intron            | DEL | TT   | TT   |
| Intron            | SNP | C    | C    |
| Silent            | SNP | C    | C    |
| Silent            | SNP | A    | A    |
| Intron            | SNP | G    | G    |
| Intron            | SNP | A    | A    |
| Intron            | SNP | G    | G    |
| Intron            | DEL | TGTG | TGTG |
| Splice_Region     | INS | -    | -    |
| Silent            | SNP | T    | T    |
| 5'UTR             | SNP | G    | G    |
| Intron            | SNP | G    | G    |
| Silent            | SNP | T    | T    |
| Intron            | SNP | G    | G    |
| Silent            | SNP | A    | A    |
| Silent            | SNP | G    | G    |
| Intron            | DEL | G    | G    |
| Missense_Mutation | SNP | C    | C    |
| Intron            | SNP | T    | T    |
| Silent            | SNP | C    | C    |
| Intron            | SNP | C    | C    |
| Intron            | SNP | T    | T    |
| Intron            | SNP | C    | C    |
| Silent            | SNP | G    | G    |
| Intron            | SNP | G    | G    |
| Intron            | SNP | T    | T    |
| Intron            | SNP | C    | C    |
| Intron            | SNP | T    | T    |
| Intron            | SNP | A    | A    |
| Intron            | SNP | T    | T    |
| 5'UTR             | SNP | A    | A    |
| Silent            | SNP | C    | C    |
| Intron            | SNP | A    | A    |
| Intron            | SNP | C    | C    |

VEP annotated somatic variants

|                   |     |      |      |
|-------------------|-----|------|------|
| Intron            | SNP | T    | T    |
| Silent            | SNP | C    | C    |
| 5'Flank           | SNP | C    | C    |
| Missense_Mutation | SNP | C    | C    |
| Intron            | SNP | A    | A    |
| Intron            | SNP | A    | A    |
| Missense_Mutation | SNP | A    | A    |
| Intron            | SNP | C    | C    |
| Intron            | SNP | T    | T    |
| Intron            | SNP | G    | G    |
| Missense_Mutation | SNP | C    | C    |
| Intron            | SNP | C    | C    |
| Intron            | SNP | G    | G    |
| Intron            | SNP | T    | T    |
| Intron            | SNP | G    | G    |
| Intron            | SNP | G    | G    |
| Silent            | SNP | C    | C    |
| Intron            | SNP | T    | T    |
| Intron            | SNP | A    | A    |
| Intron            | SNP | T    | T    |
| Silent            | SNP | C    | C    |
| Silent            | SNP | T    | T    |
| Intron            | SNP | C    | C    |
| Missense_Mutation | SNP | A    | A    |
| Intron            | SNP | G    | G    |
| Intron            | SNP | C    | C    |
| Intron            | SNP | A    | A    |
| Silent            | SNP | A    | A    |
| Intron            | SNP | A    | A    |
| Intron            | SNP | G    | G    |
| Intron            | SNP | T    | T    |
| Intron            | SNP | C    | C    |
| Missense_Mutation | SNP | A    | A    |
| Intron            | SNP | T    | T    |
| Intron            | SNP | C    | C    |
| Intron            | SNP | G    | G    |
| Missense_Mutation | SNP | C    | C    |
| Intron            | SNP | C    | C    |
| Intron            | DEL | TTTT | TTTT |
| Intron            | SNP | T    | T    |
| Splice_Region     | SNP | G    | G    |
| Intron            | SNP | G    | G    |
| Intron            | SNP | G    | G    |
| Intron            | SNP | A    | A    |
| Intron            | SNP | G    | G    |
| Intron            | SNP | G    | G    |
| 3'UTR             | SNP | C    | C    |
| Intron            | SNP | C    | C    |
| Missense_Mutation | SNP | T    | T    |
| Intron            | SNP | T    | T    |
| Intron            | SNP | A    | A    |
| Intron            | SNP | C    | C    |
| Silent            | SNP | A    | A    |
| Missense_Mutation | SNP | T    | T    |
| Missense_Mutation | SNP | C    | C    |

VEP annotated somatic variants

|                   |     |        |        |
|-------------------|-----|--------|--------|
| Intron            | INS | -      | -      |
| 5'UTR             | SNP | C      | C      |
| 5'Flank           | DEL | AGAG   | AGAG   |
| Intron            | SNP | C      | C      |
| Silent            | SNP | T      | T      |
| Intron            | SNP | C      | C      |
| Intron            | SNP | C      | C      |
| 3'Flank           | SNP | T      | T      |
| Missense_Mutation | SNP | G      | G      |
| Intron            | SNP | G      | G      |
| Silent            | SNP | A      | A      |
| Intron            | SNP | A      | A      |
| Intron            | SNP | G      | G      |
| 5'UTR             | SNP | A      | A      |
| 3'UTR             | DEL | TTAAAG | TTAAAG |
| Intron            | DEL | TCTAA  | TCTAA  |
| Intron            | SNP | C      | C      |
| Intron            | SNP | C      | C      |
| Intron            | SNP | C      | C      |
| Intron            | SNP | T      | T      |
| Intron            | SNP | T      | T      |
| Intron            | SNP | A      | A      |
| Intron            | SNP | T      | T      |
| Intron            | SNP | T      | T      |
| Intron            | SNP | A      | A      |
| Silent            | SNP | G      | G      |
| 3'UTR             | SNP | G      | G      |
| Intron            | SNP | C      | C      |
| 3'UTR             | SNP | T      | T      |
| Missense_Mutation | SNP | C      | C      |
| Silent            | SNP | G      | G      |
| Missense_Mutation | SNP | A      | A      |
| 3'Flank           | SNP | C      | C      |
| Silent            | SNP | G      | G      |
| Silent            | SNP | A      | A      |
| Missense_Mutation | SNP | T      | T      |
| Silent            | SNP | C      | C      |
| Silent            | SNP | G      | G      |
| 5'UTR             | SNP | A      | A      |
| Intron            | SNP | C      | C      |
| Splice_Region     | SNP | A      | A      |
| Silent            | SNP | A      | A      |
| Intron            | DEL | AA     | AA     |
| Intron            | SNP | C      | C      |
| In_Frame_Ins      | INS | -      | -      |
| Missense_Mutation | SNP | T      | T      |
| Silent            | SNP | G      | G      |
| Missense_Mutation | SNP | T      | T      |
| Intron            | SNP | G      | G      |
| Intron            | SNP | G      | G      |
| Intron            | SNP | G      | G      |
| Intron            | SNP | C      | C      |
| Silent            | SNP | C      | C      |
| Missense_Mutation | SNP | G      | G      |
| Intron            | SNP | T      | T      |

VEP annotated somatic variants

|                   |     |   |   |
|-------------------|-----|---|---|
| Missense_Mutation | SNP | C | C |
| Silent            | SNP | C | C |
| Splice_Region     | SNP | C | C |
| Intron            | SNP | A | A |
| Missense_Mutation | SNP | A | A |
| Intron            | SNP | A | A |
| Missense_Mutation | SNP | C | C |
| Intron            | SNP | C | C |
| Missense_Mutation | SNP | G | G |
| Intron            | SNP | G | G |
| Missense_Mutation | SNP | C | C |
| 5'Flank           | SNP | A | A |
| Silent            | SNP | G | G |
| Silent            | SNP | G | G |
| Intron            | SNP | C | C |
| Silent            | SNP | T | T |
| Splice_Region     | SNP | T | T |
| Intron            | SNP | A | A |
| Intron            | SNP | A | A |
| 3'Flank           | SNP | A | A |
| 3'Flank           | DEL | T | T |
| Missense_Mutation | SNP | C | C |
| Intron            | SNP | T | T |
| Silent            | SNP | G | G |
| Silent            | SNP | T | T |
| Missense_Mutation | SNP | G | G |
| 3'UTR             | SNP | A | A |
| Intron            | SNP | A | A |
| Intron            | SNP | C | C |
| Intron            | SNP | C | C |
| Intron            | SNP | G | G |
| Missense_Mutation | SNP | C | C |
| 5'UTR             | SNP | A | A |
| Splice_Region     | SNP | C | C |
| Intron            | INS | - | - |
| Intron            | DEL | T | T |
| Intron            | SNP | C | C |
| Silent            | SNP | C | C |
| 3'UTR             | SNP | A | A |
| Intron            | SNP | T | T |
| Silent            | SNP | A | A |
| Missense_Mutation | SNP | A | A |
| Intron            | SNP | A | A |
| Intron            | SNP | C | C |
| Silent            | SNP | C | C |
| Intron            | SNP | A | A |
| Silent            | SNP | G | G |
| RNA               | SNP | G | G |
| Intron            | SNP | A | A |
| Intron            | SNP | T | T |
| Intron            | SNP | C | C |
| Intron            | SNP | C | C |
| Intron            | SNP | T | T |
| Intron            | SNP | T | T |
| Intron            | SNP | C | C |



VEP annotated somatic variants

|                   |     |       |       |
|-------------------|-----|-------|-------|
| Intron            | INS | -     | -     |
| Missense_Mutation | SNP | C     | C     |
| Intron            | SNP | A     | A     |
| Intron            | SNP | A     | A     |
| Intron            | SNP | T     | T     |
| Missense_Mutation | SNP | T     | T     |
| Silent            | SNP | A     | A     |
| 3'UTR             | SNP | G     | G     |
| Silent            | SNP | G     | G     |
| Silent            | SNP | A     | A     |
| Silent            | SNP | A     | A     |
| Intron            | SNP | C     | C     |
| Intron            | SNP | C     | C     |
| Splice_Region     | SNP | G     | G     |
| Intron            | SNP | A     | A     |
| Intron            | SNP | G     | G     |
| Intron            | INS | -     | -     |
| Intron            | SNP | G     | G     |
| Intron            | SNP | G     | G     |
| Intron            | INS | -     | -     |
| Missense_Mutation | SNP | C     | C     |
| Intron            | SNP | T     | T     |
| Silent            | SNP | G     | G     |
| Intron            | DEL | CC    | CC    |
| Intron            | SNP | C     | C     |
| Intron            | SNP | A     | A     |
| Intron            | SNP | A     | A     |
| Intron            | SNP | G     | G     |
| Missense_Mutation | SNP | A     | A     |
| Missense_Mutation | SNP | C     | C     |
| Silent            | SNP | C     | C     |
| Intron            | SNP | T     | T     |
| In_Frame_Ins      | INS | -     | -     |
| Intron            | SNP | C     | C     |
| Intron            | SNP | G     | G     |
| 3'UTR             | SNP | G     | G     |
| Intron            | INS | -     | -     |
| Splice_Region     | SNP | C     | C     |
| Intron            | SNP | G     | G     |
| Intron            | SNP | T     | T     |
| Intron            | SNP | T     | T     |
| Intron            | SNP | A     | A     |
| Intron            | SNP | T     | T     |
| Intron            | SNP | A     | A     |
| Intron            | SNP | A     | A     |
| Intron            | SNP | A     | A     |
| 5'UTR             | SNP | G     | G     |
| Intron            | SNP | G     | G     |
| Intron            | DEL | CTGGT | CTGGT |
| Intron            | SNP | G     | G     |
| Intron            | SNP | C     | C     |
| Missense_Mutation | SNP | G     | G     |
| Intron            | SNP | G     | G     |
| Intron            | SNP | G     | G     |
| Intron            | INS | -     | -     |

VEP annotated somatic variants

|                   |     |        |        |
|-------------------|-----|--------|--------|
| Intron            | DEL | AA     | AA     |
| Intron            | SNP | G      | G      |
| Intron            | SNP | G      | G      |
| Intron            | SNP | A      | A      |
| Splice_Region     | SNP | A      | A      |
| Intron            | SNP | G      | G      |
| 5'UTR             | SNP | A      | A      |
| Intron            | SNP | G      | G      |
| Intron            | SNP | A      | A      |
| Intron            | SNP | C      | C      |
| Intron            | SNP | T      | T      |
| Intron            | SNP | T      | T      |
| Silent            | SNP | G      | G      |
| Intron            | SNP | C      | C      |
| Intron            | SNP | A      | A      |
| Intron            | SNP | T      | T      |
| Intron            | SNP | T      | T      |
| Intron            | INS | -      | -      |
| Intron            | SNP | T      | T      |
| 5'UTR             | SNP | T      | T      |
| Intron            | SNP | C      | C      |
| Missense_Mutation | SNP | A      | A      |
| 5'UTR             | SNP | G      | G      |
| Intron            | SNP | A      | A      |
| Intron            | SNP | G      | G      |
| Silent            | SNP | G      | G      |
| Intron            | INS | -      | -      |
| Intron            | SNP | T      | T      |
| Silent            | SNP | T      | T      |
| Intron            | SNP | G      | G      |
| Intron            | SNP | G      | G      |
| Intron            | SNP | C      | C      |
| Intron            | SNP | G      | G      |
| Intron            | DEL | G      | G      |
| Missense_Mutation | SNP | C      | C      |
| Silent            | SNP | A      | A      |
| Intron            | SNP | G      | G      |
| Intron            | SNP | C      | C      |
| Intron            | SNP | G      | G      |
| Silent            | SNP | A      | A      |
| Intron            | DEL | GCCTTC | GCCTTC |
| Intron            | SNP | T      | T      |
| Nonsense_Mutation | INS | -      | -      |
| 5'UTR             | SNP | A      | A      |
| Silent            | SNP | T      | T      |
| Intron            | SNP | G      | G      |
| Intron            | SNP | T      | T      |
| 5'UTR             | SNP | C      | C      |
| Splice_Region     | SNP | T      | T      |
| 5'UTR             | SNP | G      | G      |
| Silent            | SNP | C      | C      |
| Intron            | INS | -      | -      |
| 5'UTR             | SNP | C      | C      |
| Intron            | SNP | A      | A      |
| Silent            | SNP | G      | G      |

VEP annotated somatic variants

|                   |     |   |   |
|-------------------|-----|---|---|
| 3'UTR             | SNP | C | C |
| Intron            | DEL | A | A |
| Intron            | SNP | G | G |
| 3'UTR             | SNP | G | G |
| Intron            | SNP | T | T |
| Intron            | SNP | G | G |
| Missense_Mutation | SNP | G | G |
| Intron            | SNP | G | G |
| Intron            | SNP | C | C |
| Intron            | SNP | C | C |
| 3'Flank           | SNP | A | A |
| 3'Flank           | SNP | G | G |
| Intron            | SNP | A | A |
| 5'Flank           | SNP | G | G |
| Intron            | SNP | C | C |
| Intron            | SNP | C | C |
| Intron            | SNP | G | G |
| 5'UTR             | INS | - | - |
| 5'UTR             | INS | - | - |
| Silent            | SNP | C | C |
| Silent            | SNP | C | C |
| Intron            | SNP | A | A |
| Intron            | SNP | C | C |
| Silent            | SNP | C | C |
| Intron            | SNP | G | G |
| Silent            | SNP | G | G |
| Silent            | SNP | A | A |
| Intron            | SNP | A | A |
| Missense_Mutation | SNP | T | T |
| Intron            | SNP | C | C |
| Silent            | SNP | G | G |
| 5'Flank           | SNP | T | T |
| Intron            | SNP | G | G |
| Silent            | SNP | C | C |
| Intron            | SNP | G | G |
| Silent            | SNP | C | C |
| Intron            | SNP | G | G |
| Intron            | SNP | T | T |
| Intron            | SNP | A | A |
| Intron            | SNP | G | G |
| Intron            | SNP | C | C |
| Intron            | SNP | G | G |
| Intron            | SNP | A | A |
| Silent            | SNP | A | A |
| Intron            | SNP | G | G |
| Intron            | SNP | G | G |
| Silent            | SNP | C | C |
| Intron            | SNP | C | C |
| Intron            | SNP | T | T |
| Missense_Mutation | SNP | A | A |
| Intron            | SNP | G | G |
| Intron            | SNP | G | G |
| 3'Flank           | SNP | A | A |
| Intron            | SNP | C | C |
| Missense_Mutation | SNP | A | A |

VEP annotated somatic variants

|                   |     |     |     |
|-------------------|-----|-----|-----|
| Intron            | SNP | A   | A   |
| 5'Flank           | SNP | C   | C   |
| Intron            | SNP | G   | G   |
| Intron            | SNP | C   | C   |
| Missense_Mutation | SNP | G   | G   |
| Intron            | SNP | G   | G   |
| Missense_Mutation | SNP | C   | C   |
| Intron            | SNP | G   | G   |
| Intron            | DEL | GAC | GAC |
| Intron            | SNP | A   | A   |
| Missense_Mutation | SNP | A   | A   |
| Intron            | SNP | C   | C   |
| Intron            | SNP | C   | C   |
| Missense_Mutation | SNP | A   | A   |
| Intron            | SNP | A   | A   |
| Intron            | SNP | G   | G   |
| Intron            | SNP | T   | T   |
| Intron            | SNP | C   | C   |
| Intron            | SNP | C   | C   |
| Intron            | SNP | G   | G   |
| Intron            | SNP | G   | G   |
| Intron            | SNP | G   | G   |
| Intron            | SNP | G   | G   |
| Intron            | SNP | G   | G   |
| Intron            | SNP | T   | T   |
| Silent            | SNP | A   | A   |
| Intron            | SNP | G   | G   |
| 5'UTR             | SNP | G   | G   |
| Intron            | DEL | TT  | TT  |
| Intron            | SNP | T   | T   |
| Intron            | SNP | G   | G   |
| Intron            | SNP | G   | G   |
| 3'Flank           | SNP | T   | T   |
| Silent            | SNP | T   | T   |
| Intron            | SNP | C   | C   |
| Splice_Region     | SNP | C   | C   |
| Intron            | SNP | C   | C   |
| Missense_Mutation | SNP | G   | G   |
| Intron            | SNP | C   | C   |
| Intron            | INS | -   | -   |
| Intron            | SNP | G   | G   |
| Intron            | SNP | T   | T   |
| Intron            | SNP | C   | C   |
| Silent            | SNP | G   | G   |
| Missense_Mutation | SNP | T   | T   |
| Intron            | SNP | C   | C   |
| Intron            | SNP | A   | A   |
| Missense_Mutation | SNP | T   | T   |
| Intron            | SNP | G   | G   |
| Intron            | SNP | G   | G   |
| Silent            | SNP | T   | T   |
| Intron            | SNP | G   | G   |
| Silent            | SNP | T   | T   |
| Intron            | INS | -   | -   |
| Intron            | SNP | C   | C   |

VEP annotated somatic variants

|                   |     |           |           |
|-------------------|-----|-----------|-----------|
| Intron            | SNP | C         | C         |
| Intron            | SNP | C         | C         |
| Intron            | SNP | T         | T         |
| Intron            | DEL | C         | C         |
| Intron            | SNP | C         | C         |
| Intron            | SNP | G         | G         |
| Intron            | SNP | G         | G         |
| Intron            | SNP | G         | G         |
| Intron            | SNP | A         | A         |
| Intron            | SNP | A         | A         |
| Intron            | SNP | G         | G         |
| Silent            | SNP | G         | G         |
| Intron            | SNP | G         | G         |
| Intron            | SNP | A         | A         |
| Intron            | SNP | A         | A         |
| Intron            | SNP | G         | G         |
| Intron            | SNP | G         | G         |
| 3'Flank           | SNP | G         | G         |
| Intron            | SNP | C         | C         |
| Silent            | SNP | G         | G         |
| Silent            | SNP | C         | C         |
| Intron            | DEL | CGAAGAGTG | CGAAGAGTG |
| Intron            | SNP | T         | T         |
| Intron            | DEL | TT        | TT        |
| Intron            | SNP | C         | C         |
| Silent            | SNP | G         | G         |
| Intron            | SNP | G         | G         |
| Splice_Region     | SNP | C         | C         |
| Intron            | SNP | C         | C         |
| Splice_Region     | SNP | G         | G         |
| Silent            | SNP | A         | A         |
| Silent            | SNP | G         | G         |
| Silent            | SNP | G         | G         |
| Intron            | SNP | G         | G         |
| Intron            | SNP | A         | A         |
| Missense_Mutation | SNP | A         | A         |
| Missense_Mutation | SNP | G         | G         |
| Silent            | SNP | C         | C         |
| Intron            | SNP | G         | G         |
| Intron            | SNP | C         | C         |
| Missense_Mutation | SNP | C         | C         |
| RNA               | SNP | G         | G         |
| Intron            | SNP | C         | C         |
| RNA               | SNP | T         | T         |
| Intron            | DEL | G         | G         |
| 3'UTR             | SNP | C         | C         |
| Intron            | SNP | G         | G         |
| Intron            | SNP | A         | A         |
| Intron            | DEL | C         | C         |
| Silent            | SNP | T         | T         |
| Intron            | DEL | C         | C         |
| Silent            | SNP | C         | C         |
| Intron            | SNP | G         | G         |
| Intron            | SNP | A         | A         |
| Intron            | DEL | C         | C         |

VEP annotated somatic variants

|                   |     |          |          |
|-------------------|-----|----------|----------|
| Intron            | SNP | A        | A        |
| Silent            | SNP | T        | T        |
| 5'UTR             | SNP | C        | C        |
| 3'Flank           | SNP | C        | C        |
| Intron            | DEL | ATAT     | ATAT     |
| Intron            | SNP | T        | T        |
| Intron            | SNP | A        | A        |
| Intron            | SNP | G        | G        |
| Missense_Mutation | SNP | T        | T        |
| 3'Flank           | SNP | C        | C        |
| 3'UTR             | SNP | C        | C        |
| Intron            | SNP | G        | G        |
| Missense_Mutation | SNP | G        | G        |
| Intron            | SNP | G        | G        |
| Intron            | SNP | C        | C        |
| Intron            | SNP | A        | A        |
| Intron            | SNP | A        | A        |
| Silent            | SNP | G        | G        |
| Intron            | SNP | A        | A        |
| Silent            | SNP | G        | G        |
| Intron            | SNP | T        | T        |
| Silent            | SNP | C        | C        |
| Missense_Mutation | SNP | C        | C        |
| Missense_Mutation | SNP | G        | G        |
| Silent            | SNP | G        | G        |
| Intron            | SNP | C        | C        |
| Missense_Mutation | SNP | G        | G        |
| Intron            | SNP | T        | T        |
| Intron            | SNP | C        | C        |
| Silent            | SNP | G        | G        |
| Intron            | SNP | C        | C        |
| Intron            | SNP | T        | T        |
| Missense_Mutation | SNP | G        | G        |
| Intron            | INS | -        | -        |
| Missense_Mutation | SNP | C        | C        |
| Intron            | SNP | C        | C        |
| Missense_Mutation | SNP | T        | T        |
| Intron            | SNP | C        | C        |
| Intron            | SNP | G        | G        |
| Missense_Mutation | SNP | G        | G        |
| Missense_Mutation | SNP | T        | T        |
| Intron            | SNP | C        | C        |
| 3'UTR             | SNP | C        | C        |
| Silent            | SNP | C        | C        |
| Intron            | DEL | AAACAAAC | AAACAAAC |
| Intron            | SNP | C        | C        |
| Intron            | SNP | A        | A        |
| Intron            | INS | -        | -        |
| Intron            | SNP | G        | G        |
| Intron            | SNP | T        | T        |
| Splice_Site       | SNP | G        | G        |
| Silent            | SNP | C        | C        |
| Missense_Mutation | SNP | C        | C        |
| Intron            | SNP | G        | G        |
| Intron            | SNP | A        | A        |

VEP annotated somatic variants

|                   |     |                |                |
|-------------------|-----|----------------|----------------|
| Missense_Mutation | SNP | G              | G              |
| Silent            | SNP | A              | A              |
| Intron            | SNP | G              | G              |
| Intron            | DEL | C              | C              |
| Silent            | SNP | T              | T              |
| 3'UTR             | SNP | T              | T              |
| Intron            | DEL | G              | G              |
| Intron            | SNP | T              | T              |
| Intron            | SNP | G              | G              |
| Silent            | SNP | G              | G              |
| 3'UTR             | SNP | G              | G              |
| Intron            | SNP | T              | T              |
| Intron            | SNP | C              | C              |
| 5'UTR             | SNP | G              | G              |
| Silent            | SNP | C              | C              |
| Intron            | SNP | T              | T              |
| Intron            | SNP | T              | T              |
| Missense_Mutation | SNP | A              | A              |
| Intron            | SNP | G              | G              |
| Intron            | SNP | C              | C              |
| Silent            | SNP | G              | G              |
| Intron            | DEL | T              | T              |
| 5'UTR             | SNP | G              | G              |
| Missense_Mutation | SNP | A              | A              |
| Intron            | SNP | G              | G              |
| Missense_Mutation | SNP | G              | G              |
| Intron            | SNP | T              | T              |
| Intron            | SNP | G              | G              |
| Intron            | DEL | TAGGTTGACTATCA | TAGGTTGACTATCA |
| Silent            | SNP | A              | A              |
| 3'UTR             | SNP | C              | C              |
| Intron            | SNP | A              | A              |
| Silent            | SNP | C              | C              |
| Silent            | SNP | C              | C              |
| Intron            | SNP | G              | G              |
| Missense_Mutation | SNP | C              | C              |
| Missense_Mutation | SNP | G              | G              |
| Missense_Mutation | SNP | T              | T              |
| Intron            | SNP | A              | A              |
| Silent            | SNP | C              | C              |
| Intron            | INS | -              | -              |
| Intron            | SNP | A              | A              |
| Silent            | SNP | T              | T              |
| Splice_Region     | SNP | T              | T              |
| Intron            | SNP | C              | C              |
| Intron            | SNP | C              | C              |
| Intron            | SNP | T              | T              |
| Missense_Mutation | SNP | A              | A              |
| Intron            | SNP | T              | T              |
| Intron            | SNP | C              | C              |
| Intron            | SNP | G              | G              |
| Intron            | SNP | G              | G              |
| Intron            | SNP | C              | C              |
| Missense_Mutation | SNP | A              | A              |
| Splice_Region     | SNP | A              | A              |

VEP annotated somatic variants

|                   |     |   |   |
|-------------------|-----|---|---|
| Intron            | INS | - | - |
| Silent            | SNP | T | T |
| Missense_Mutation | SNP | C | C |
| Silent            | SNP | T | T |
| Intron            | SNP | T | T |
| Intron            | SNP | C | C |
| Intron            | SNP | T | T |
| Missense_Mutation | SNP | C | C |
| Intron            | SNP | A | A |
| Intron            | SNP | G | G |
| Missense_Mutation | SNP | A | A |
| Intron            | SNP | G | G |
| Intron            | SNP | C | C |
| Intron            | SNP | A | A |
| Missense_Mutation | SNP | C | C |
| Intron            | SNP | A | A |
| Silent            | SNP | G | G |
| Intron            | SNP | T | T |
| Missense_Mutation | SNP | G | G |
| Intron            | SNP | G | G |
| Intron            | SNP | G | G |
| Missense_Mutation | SNP | C | C |
| Intron            | SNP | G | G |
| 5'UTR             | SNP | T | T |
| Intron            | SNP | T | T |
| Silent            | SNP | A | A |
| Intron            | SNP | T | T |
| Splice_Region     | SNP | C | C |
| Silent            | SNP | A | A |
| Intron            | SNP | A | A |
| 3'UTR             | SNP | A | A |
| Intron            | SNP | C | C |
| Silent            | SNP | A | A |
| Intron            | SNP | T | T |
| Intron            | SNP | C | C |
| Intron            | SNP | G | G |
| Intron            | SNP | A | A |
| Intron            | SNP | C | C |
| Silent            | SNP | T | T |
| 3'UTR             | SNP | G | G |
| Intron            | SNP | G | G |
| Intron            | SNP | G | G |
| RNA               | SNP | C | C |
| Intron            | SNP | G | G |
| Splice_Region     | SNP | T | T |
| Intron            | SNP | C | C |
| Missense_Mutation | SNP | G | G |
| Splice_Region     | SNP | C | C |
| Intron            | SNP | T | T |
| Intron            | SNP | C | C |
| IGR               | SNP | G | G |
| Silent            | SNP | G | G |
| Intron            | SNP | C | C |
| Missense_Mutation | SNP | C | C |
| Silent            | SNP | T | T |



VEP annotated somatic variants

|                   |     |                    |                    |
|-------------------|-----|--------------------|--------------------|
| Nonsense_Mutation | INS | -                  | -                  |
| Silent            | SNP | G                  | G                  |
| Intron            | SNP | A                  | A                  |
| Intron            | SNP | A                  | A                  |
| 3'UTR             | INS | -                  | -                  |
| Intron            | SNP | A                  | A                  |
| Intron            | SNP | C                  | C                  |
| Intron            | SNP | T                  | T                  |
| Intron            | SNP | C                  | C                  |
| Intron            | SNP | A                  | A                  |
| Intron            | SNP | G                  | G                  |
| Missense_Mutation | SNP | C                  | C                  |
| Intron            | SNP | C                  | C                  |
| Silent            | SNP | C                  | C                  |
| 3'Flank           | DEL | C                  | C                  |
| Intron            | SNP | A                  | A                  |
| Missense_Mutation | SNP | T                  | T                  |
| Intron            | SNP | A                  | A                  |
| Intron            | SNP | C                  | C                  |
| Silent            | SNP | G                  | G                  |
| Intron            | SNP | C                  | C                  |
| Silent            | SNP | G                  | G                  |
| Intron            | SNP | C                  | C                  |
| Intron            | SNP | T                  | T                  |
| Intron            | SNP | G                  | G                  |
| Intron            | SNP | C                  | C                  |
| Intron            | SNP | G                  | G                  |
| Intron            | SNP | T                  | T                  |
| In_Frame_Del      | DEL | :CTCCTCCTCCTCCCTT; | :CTCCTCCTCCTCCCTT. |
| Intron            | SNP | G                  | G                  |
| Intron            | SNP | G                  | G                  |
| Missense_Mutation | SNP | G                  | G                  |
| Silent            | SNP | A                  | A                  |
| Missense_Mutation | SNP | G                  | G                  |
| Intron            | SNP | A                  | A                  |
| Intron            | SNP | C                  | C                  |
| Intron            | SNP | G                  | G                  |
| Silent            | SNP | C                  | C                  |
| Intron            | SNP | A                  | A                  |
| 3'UTR             | SNP | G                  | G                  |
| Intron            | SNP | G                  | G                  |
| Intron            | SNP | G                  | G                  |
| Splice_Region     | SNP | A                  | A                  |
| Silent            | SNP | T                  | T                  |
| Intron            | SNP | C                  | C                  |
| Intron            | SNP | G                  | G                  |
| Intron            | SNP | A                  | A                  |
| Silent            | SNP | T                  | T                  |
| Silent            | SNP | C                  | C                  |
| Intron            | SNP | T                  | T                  |
| Intron            | SNP | C                  | C                  |
| Intron            | SNP | A                  | A                  |
| 5'UTR             | SNP | G                  | G                  |
| Intron            | SNP | C                  | C                  |
| Intron            | SNP | C                  | C                  |

VEP annotated somatic variants

|                   |     |   |   |
|-------------------|-----|---|---|
| Silent            | SNP | C | C |
| Missense_Mutation | SNP | A | A |
| Silent            | SNP | G | G |
| Intron            | SNP | C | C |
| Intron            | SNP | T | T |
| Missense_Mutation | SNP | A | A |
| Intron            | SNP | A | A |
| 3'UTR             | SNP | A | A |
| Intron            | SNP | G | G |
| Intron            | SNP | A | A |
| Intron            | SNP | G | G |
| Intron            | SNP | G | G |
| Splice_Region     | SNP | C | C |
| Missense_Mutation | SNP | T | T |
| Intron            | SNP | C | C |
| Intron            | SNP | G | G |
| Intron            | SNP | A | A |
| Intron            | SNP | G | G |
| Silent            | SNP | T | T |
| Intron            | SNP | T | T |
| Intron            | SNP | A | A |
| Intron            | SNP | T | T |
| Intron            | SNP | T | T |
| Missense_Mutation | SNP | G | G |
| Missense_Mutation | SNP | G | G |
| Missense_Mutation | SNP | G | G |
| 5'UTR             | INS | - | - |
| Missense_Mutation | SNP | C | C |
| Silent            | SNP | G | G |
| Missense_Mutation | SNP | T | T |
| Intron            | SNP | C | C |
| Silent            | SNP | C | C |
| Missense_Mutation | SNP | A | A |
| Silent            | SNP | C | C |
| Silent            | SNP | C | C |
| Missense_Mutation | SNP | C | C |
| Intron            | SNP | T | T |
| Intron            | SNP | G | G |
| Intron            | SNP | C | C |

VEP annotated somatic variants

| Tumor_Seq_Allele2 | dbSNP_RS              | dbSNP_Val_Status | Tumor_Sample_Barcode |
|-------------------|-----------------------|------------------|----------------------|
| AA                | novel                 |                  | TUMOR                |
| C                 | rs10978447            |                  | TUMOR                |
| C                 | rs279677              |                  | TUMOR                |
| G                 | rs11077414            |                  | TUMOR                |
| T                 | novel                 |                  | TUMOR                |
| G                 | rs2041171             |                  | TUMOR                |
| G                 | rs2364315             |                  | TUMOR                |
| G                 | rs6501947             |                  | TUMOR                |
| A                 | rs554012320           |                  | TUMOR                |
| -                 | rs55685226            |                  | TUMOR                |
| T                 | rs1799859             |                  | TUMOR                |
| GAGCGGGCGA        | rs150746310           |                  | TUMOR                |
| A                 | rs12600864            |                  | TUMOR                |
| C                 | rs740250              |                  | TUMOR                |
| T                 | rs144177905           |                  | TUMOR                |
| A                 | novel                 |                  | TUMOR                |
| G                 | rs1251075             |                  | TUMOR                |
| T                 | rs41291346            |                  | TUMOR                |
| C                 | rs41303309            |                  | TUMOR                |
| A                 | rs747166030           |                  | TUMOR                |
| A                 | rs11039146            |                  | TUMOR                |
| A                 | rs13087169            |                  | TUMOR                |
| A                 | rs12915634            |                  | TUMOR                |
| T                 | rs61729367            |                  | TUMOR                |
| T                 | rs7485573             |                  | TUMOR                |
| A                 | novel                 |                  | TUMOR                |
| T                 | rs41264285            |                  | TUMOR                |
| ATAA              | rs35431407            |                  | TUMOR                |
| A                 | rs12774070            |                  | TUMOR                |
| G                 | rs2251105             |                  | TUMOR                |
| -                 |                       |                  | TUMOR                |
| T                 | rs3813622             |                  | TUMOR                |
| G                 | rs75553188            |                  | TUMOR                |
| G                 | rs56778727            |                  | TUMOR                |
| -                 | rs67418568            |                  | TUMOR                |
| G                 | rs41282522            |                  | TUMOR                |
| C                 | rs621375              |                  | TUMOR                |
| C                 | rs342467              |                  | TUMOR                |
| A                 | rs34463921            |                  | TUMOR                |
| G                 | rs200527701           |                  | TUMOR                |
| C                 | rs12671813            |                  | TUMOR                |
| T                 | rs5182                |                  | TUMOR                |
| C                 | rs13218824            |                  | TUMOR                |
| A                 | rs8050390             |                  | TUMOR                |
| C                 | rs7774011             |                  | TUMOR                |
| T                 | rs7517559             |                  | TUMOR                |
| T                 | rs72649360            |                  | TUMOR                |
| T                 | rs62619924            |                  | TUMOR                |
| T                 | rs878081              |                  | TUMOR                |
| C                 | rs1003854             |                  | TUMOR                |
| T                 | rs733957              |                  | TUMOR                |
| G                 | rs17164315            |                  | TUMOR                |
| T                 | rs369069231,rs4732036 |                  | TUMOR                |
| A                 | novel                 |                  | TUMOR                |

VEP annotated somatic variants

|   |             |       |
|---|-------------|-------|
| A | rs62128062  | TUMOR |
| A | rs4646686   | TUMOR |
| T | rs1051713   | TUMOR |
| C | rs55736017  | TUMOR |
| T | rs2289140   | TUMOR |
| C | rs1626649   | TUMOR |
| G | rs1793173   | TUMOR |
| T | rs56780932  | TUMOR |
| G | rs2304872   | TUMOR |
| - | rs3067424   | TUMOR |
| A | rs4938014   | TUMOR |
| A | rs35235926  | TUMOR |
| C | rs7853994   | TUMOR |
| C | rs7096505   | TUMOR |
| G | rs7630642   | TUMOR |
| A | rs11578772  | TUMOR |
| T | rs871130    | TUMOR |
| T | rs115250350 | TUMOR |
| A | novel       | TUMOR |
| T | novel       | TUMOR |
| C | rs2301587   | TUMOR |
| C | rs140072315 | TUMOR |
| T | rs755049876 | TUMOR |
| A | novel       | TUMOR |
| T | rs74869251  | TUMOR |
| T | novel       | TUMOR |
| G | rs71428454  | TUMOR |
| G | rs71428453  | TUMOR |
| G | rs455671    | TUMOR |
| T | rs17138632  | TUMOR |
| - | novel       | TUMOR |
| G | rs2276932   | TUMOR |
| G | rs793524    | TUMOR |
| C | rs10521763  | TUMOR |
| T | rs62620965  | TUMOR |
| T | rs16837847  | TUMOR |
| A | rs7550948   | TUMOR |
| G | rs74404550  | TUMOR |
| C | rs3772219   | TUMOR |
| C | rs2296354   | TUMOR |
| G | rs10972173  | TUMOR |
| A | rs12359433  | TUMOR |
| T | rs6778511   | TUMOR |
| T | rs963618    | TUMOR |
| G | rs5951332   | TUMOR |
| A | rs2361298   | TUMOR |
| T | rs3174476   | TUMOR |
| G | rs28365160  | TUMOR |
| A | rs2305738   | TUMOR |
| A | rs28597966  | TUMOR |
| A | rs6151415   | TUMOR |
| G | novel       | TUMOR |
| T | rs2257090   | TUMOR |
| G | rs62251997  | TUMOR |
| - | rs143019035 | TUMOR |

VEP annotated somatic variants

|   |             |       |
|---|-------------|-------|
| T | novel       | TUMOR |
| A | rs1872858   | TUMOR |
| T | rs9895872   | TUMOR |
| A | rs1168966   | TUMOR |
| G | rs749457    | TUMOR |
| C | rs11790014  | TUMOR |
| A | rs8086318   | TUMOR |
| T | novel       | TUMOR |
| G | rs12125325  | TUMOR |
| C | rs45570436  | TUMOR |
| A | rs36048052  | TUMOR |
| A | rs56290406  | TUMOR |
| T | rs17846715  | TUMOR |
| G | rs12131640  | TUMOR |
| G | rs1891      | TUMOR |
| T | rs2853759   | TUMOR |
| A | rs113968994 | TUMOR |
| A | novel       | TUMOR |
| A | rs6021355   | TUMOR |
| A | rs3827032   | TUMOR |
| G | rs6442124   | TUMOR |
| T | rs35725751  | TUMOR |
| T | rs1152194   | TUMOR |
| G | rs2281933   | TUMOR |
| C | rs11577579  | TUMOR |
| C | rs11374767  | TUMOR |
| A | rs36686     | TUMOR |
| T | rs7210438   | TUMOR |
| A | novel       | TUMOR |
| A | rs309370    | TUMOR |
| G | rs45500792  | TUMOR |
| C | rs73137012  | TUMOR |
| T | rs12388749  | TUMOR |
| T | rs741886    | TUMOR |
| A | rs754125003 | TUMOR |
| A | rs34233512  | TUMOR |
| G | rs41308602  | TUMOR |
| G | rs536159058 | TUMOR |
| A | rs62207506  | TUMOR |
| T | rs193243275 | TUMOR |
| T | rs3092994   | TUMOR |
| T | rs8176235   | TUMOR |
| C | rs273900734 | TUMOR |
| T | rs2126042   | TUMOR |
| T | rs13153992  | TUMOR |
| A | rs2836972   | TUMOR |
| G | rs2273376   | TUMOR |
| C | rs2283569   | TUMOR |
| T | rs28992474  | TUMOR |
| T | rs11200559  | TUMOR |
| A | rs986178    | TUMOR |
| A | novel       | TUMOR |
| T | novel       | TUMOR |
| T | rs6601166   | TUMOR |
| G | rs11652816  | TUMOR |

VEP annotated somatic variants

|                   |             |       |
|-------------------|-------------|-------|
| TTGTAGACCATGACTTT | novel       | TUMOR |
| C                 | rs12411843  | TUMOR |
| A                 | rs7079392   | TUMOR |
| A                 | rs3740694   | TUMOR |
| C                 | rs10507274  | TUMOR |
| T                 | rs2111146   | TUMOR |
| -                 | rs139293175 | TUMOR |
| -                 | rs112580616 | TUMOR |
| A                 | rs2302315   | TUMOR |
| C                 | rs730228    | TUMOR |
| C                 | rs8110590   | TUMOR |
| C                 | rs2304176   | TUMOR |
| T                 | rs17261572  | TUMOR |
| G                 | rs10927267  | TUMOR |
| -                 | rs148512971 | TUMOR |
| C                 | rs6688703   | TUMOR |
| C                 | rs41289218  | TUMOR |
| C                 | rs11077410  | TUMOR |
| C                 | rs761967500 | TUMOR |
| A                 | novel       | TUMOR |
| T                 | rs366510    | TUMOR |
| A                 | novel       | TUMOR |
| G                 | rs41260544  | TUMOR |
| C                 | rs2269067   | TUMOR |
| C                 | rs665728    | TUMOR |
| T                 | rs139255231 | TUMOR |
| G                 | rs2286634   | TUMOR |
| A                 | rs149154082 | TUMOR |
| T                 | rs62231971  | TUMOR |
| -                 | novel       | TUMOR |
| C                 | rs7034745   | TUMOR |
| T                 | rs77802779  | TUMOR |
| A                 | novel       | TUMOR |
| G                 | rs2239801   | TUMOR |
| C                 | rs11014511  | TUMOR |
| C                 | rs187651793 | TUMOR |
| T                 | rs7797991   | TUMOR |
| A                 | novel       | TUMOR |
| A                 | rs41291299  | TUMOR |
| A                 | rs734348    | TUMOR |
| T                 | rs343989    | TUMOR |
| T                 | rs62113420  | TUMOR |
| T                 | rs6925778   | TUMOR |
| T                 | rs2493145   | TUMOR |
| T                 | rs181863983 | TUMOR |
| C                 | rs738304    | TUMOR |
| A                 | rs2304134   | TUMOR |
| T                 | rs11574685  | TUMOR |
| C                 | rs3747622   | TUMOR |
| A                 | novel       | TUMOR |
| G                 | rs8106895   | TUMOR |
| T                 | rs1974763   | TUMOR |
| T                 | rs74901418  | TUMOR |
| -                 | rs11280083  | TUMOR |
| A                 | rs35352238  | TUMOR |

VEP annotated somatic variants

|     |                        |       |
|-----|------------------------|-------|
| A   | rs920791               | TUMOR |
| A   | novel                  | TUMOR |
| G   | rs144266211            | TUMOR |
| C   | rs74002500             | TUMOR |
| G   | rs146524252            | TUMOR |
| A   | novel                  | TUMOR |
| T   | rs3762117              | TUMOR |
| A   | rs670650               | TUMOR |
| A   | rs11653797             | TUMOR |
| T   | novel                  | TUMOR |
| A   | rs11234627             | TUMOR |
| T   | rs3136658              | TUMOR |
| A   | rs3092960              | TUMOR |
| G   | rs2351528              | TUMOR |
| -   | rs200703227,rs58161637 | TUMOR |
| G   | rs11265493             | TUMOR |
| -   | rs55682471             | TUMOR |
| C   | rs735482               | TUMOR |
| G   | rs4844390              | TUMOR |
| -   | rs779696544            | TUMOR |
| A   | rs545464360            | TUMOR |
| C   | rs561895               | TUMOR |
| T   | rs2073760              | TUMOR |
| C   | rs3749191              | TUMOR |
| T   | rs368295466            | TUMOR |
| C   | rs2272211              | TUMOR |
| A   | rs2069529              | TUMOR |
| T   | novel                  | TUMOR |
| G   | rs56087852             | TUMOR |
| A   | rs762173324            | TUMOR |
| A   | rs13043456             | TUMOR |
| A   | rs1265045              | TUMOR |
| G   | rs2302399              | TUMOR |
| A   | rs143775364            | TUMOR |
| AAG | rs5828129              | TUMOR |
| T   | rs2231496              | TUMOR |
| C   | rs2300687              | TUMOR |
| A   | rs5747211              | TUMOR |
| C   | rs2244682              | TUMOR |
| C   | rs75243280             | TUMOR |
| -   | rs56066672,rs68186132  | TUMOR |
| T   | rs41285260             | TUMOR |
| T   | rs117156562            | TUMOR |
| A   | novel                  | TUMOR |
| C   | rs62269547             | TUMOR |
| T   | rs6766818              | TUMOR |
| T   | rs1673607              | TUMOR |
| T   | novel                  | TUMOR |
| G   | rs2270202              | TUMOR |
| A   | novel                  | TUMOR |
| T   | rs1061170              | TUMOR |
| A   | rs1800136              | TUMOR |
| C   | rs111775228            | TUMOR |
| C   | rs1890042              | TUMOR |
| A   | rs2291254              | TUMOR |

VEP annotated somatic variants

|                   |             |       |
|-------------------|-------------|-------|
| C                 | rs12832244  | TUMOR |
| T                 | rs11556868  | TUMOR |
| C                 | rs2302764   | TUMOR |
| A                 | rs582736    | TUMOR |
| T                 | rs4781019   | TUMOR |
| A                 | rs7012      | TUMOR |
| T                 | rs278126    | TUMOR |
| C                 | rs3012627   | TUMOR |
| C                 | rs34054011  | TUMOR |
| A                 | novel       | TUMOR |
| A                 | rs34398185  | TUMOR |
| T                 | novel       | TUMOR |
| C                 | rs11834597  | TUMOR |
| G                 | rs559165    | TUMOR |
| T                 | novel       | TUMOR |
| T                 | rs3817012   | TUMOR |
| A                 | rs2305450   | TUMOR |
| C                 | novel       | TUMOR |
| A                 | rs3829211   | TUMOR |
| A                 | rs11540994  | TUMOR |
| G                 | rs1660694   | TUMOR |
| T                 | rs1049353   | TUMOR |
| A                 | rs13068264  | TUMOR |
| C                 | rs3779032   | TUMOR |
| G                 | rs3779031   | TUMOR |
| G                 | rs72760251  | TUMOR |
| T                 | rs1129262   | TUMOR |
| G                 | rs2303793   | TUMOR |
| G                 | rs62482495  | TUMOR |
| AAATGGAGACAATGTTG | novel       | TUMOR |
| A                 | rs2973747   | TUMOR |
| C                 | rs7538391   | TUMOR |
| A                 | rs17128726  | TUMOR |
| A                 | rs17393069  | TUMOR |
| C                 | rs2295915   | TUMOR |
| T                 | novel       | TUMOR |
| C                 | rs2839077   | TUMOR |
| -                 | novel       | TUMOR |
| G                 | rs4818      | TUMOR |
| G                 | rs10927335  | TUMOR |
| C                 | novel       | TUMOR |
| T                 | rs117188117 | TUMOR |
| A                 | rs1564823   | TUMOR |
| G                 | rs17618     | TUMOR |
| A                 | rs10760282  | TUMOR |
| G                 | rs8192494   | TUMOR |
| A                 | rs181484126 | TUMOR |
| A                 | rs3821157   | TUMOR |
| T                 | rs488132    | TUMOR |
| TTGGGCATTGTCTGT   | novel       | TUMOR |
| T                 | rs147910113 | TUMOR |
| C                 | rs1506441   | TUMOR |
| T                 | rs974572    | TUMOR |
| A                 | rs2515838   | TUMOR |
| T                 | novel       | TUMOR |



VEP annotated somatic variants

|    |                        |       |
|----|------------------------|-------|
| G  | rs62027240             | TUMOR |
| A  | rs11699220             | TUMOR |
| T  | rs4502229              | TUMOR |
| C  | rs3750863              | TUMOR |
| T  | rs2297581              | TUMOR |
| A  | rs41289311             | TUMOR |
| G  | rs12248333             | TUMOR |
| G  | rs41274912             | TUMOR |
| G  | rs10231075             | TUMOR |
| A  | rs782154947            | TUMOR |
| T  | rs2304858              | TUMOR |
| T  | rs6433817              | TUMOR |
| A  | rs659040               | TUMOR |
| T  | novel                  | TUMOR |
| A  | novel                  | TUMOR |
| A  | rs35206429             | TUMOR |
| G  | rs1709082              | TUMOR |
| T  | rs1709081              | TUMOR |
| -  | novel                  | TUMOR |
| T  | rs16995376             | TUMOR |
| A  | rs4729021              | TUMOR |
| A  | rs198430               | TUMOR |
| C  | rs687670               | TUMOR |
| G  | rs2622733              | TUMOR |
| C  | rs1056142              | TUMOR |
| C  | rs10409785             | TUMOR |
| A  | rs55681834             | TUMOR |
| G  | rs1431196              | TUMOR |
| A  | rs9467075              | TUMOR |
| G  | novel                  | TUMOR |
| G  | rs4742                 | TUMOR |
| C  | rs531346334            | TUMOR |
| C  | rs41313157             | TUMOR |
| T  | rs17416794             | TUMOR |
| C  | rs10739633             | TUMOR |
| G  | rs952374               | TUMOR |
| C  | rs9942410              | TUMOR |
| A  | rs5993488              | TUMOR |
| A  | rs374861176            | TUMOR |
| T  | rs2275874              | TUMOR |
| TG | rs146907010            | TUMOR |
| T  | rs4072887              | TUMOR |
| C  | rs9915640              | TUMOR |
| G  | rs55956367             | TUMOR |
| A  | rs2271958              | TUMOR |
| C  | rs72792311             | TUMOR |
| A  | novel                  | TUMOR |
| -  | rs3082917              | TUMOR |
| G  | rs3082                 | TUMOR |
| T  | rs11588937             | TUMOR |
| A  | rs10096210             | TUMOR |
| G  | rs17146082             | TUMOR |
| G  | rs2281868              | TUMOR |
| T  | rs778081516,rs41274582 | TUMOR |
| T  | rs72857275             | TUMOR |

VEP annotated somatic variants

|                 |             |       |
|-----------------|-------------|-------|
| T               | rs11084816  | TUMOR |
| G               | rs12221039  | TUMOR |
| C               | novel       | TUMOR |
| G               | rs4234394   | TUMOR |
| T               | rs12034925  | TUMOR |
| G               | rs12042900  | TUMOR |
| G               | rs1995482   | TUMOR |
| G               | rs79984676  | TUMOR |
| G               | rs41304141  | TUMOR |
| T               | rs12951733  | TUMOR |
| C               | novel       | TUMOR |
| C               | rs12948962  | TUMOR |
| C               | rs41267309  | TUMOR |
| A               | rs41298531  | TUMOR |
| -               | novel       | TUMOR |
| G               | rs6884561   | TUMOR |
| T               | rs2306431   | TUMOR |
| A               | rs2286329   | TUMOR |
| C               | rs1126464   | TUMOR |
| C               | rs2304175   | TUMOR |
| G               | novel       | TUMOR |
| T               | rs61935050  | TUMOR |
| A               | rs76390929  | TUMOR |
| T               | rs3213505   | TUMOR |
| C               | rs3747280   | TUMOR |
| A               | rs5967281   | TUMOR |
| A               | rs2276343   | TUMOR |
| -               | rs140490580 | TUMOR |
| A               | rs7234288   | TUMOR |
| T               | rs36101975  | TUMOR |
| T               | rs56148603  | TUMOR |
| G               | novel       | TUMOR |
| A               | rs34278949  | TUMOR |
| C               | rs369225897 | TUMOR |
| C               | rs191289705 | TUMOR |
| A               | rs4236506   | TUMOR |
| C               | rs1005887   | TUMOR |
| C               | rs770087    | TUMOR |
| A               | rs62467724  | TUMOR |
| C               | rs313407    | TUMOR |
| G               | rs1782383   | TUMOR |
| T               | rs782358140 | TUMOR |
| A               | rs1076669   | TUMOR |
| G               | rs6750085   | TUMOR |
| A               | rs35443668  | TUMOR |
| T               | rs1919691   | TUMOR |
| A               | novel       | TUMOR |
| T               | rs2070699   | TUMOR |
| T               | novel       | TUMOR |
| T               | rs61933720  | TUMOR |
| C               | rs310618    | TUMOR |
| GGGGTGGGAATCACC | novel       | TUMOR |
| G               | rs56380058  | TUMOR |
| -               | rs111797029 | TUMOR |
| A               | rs10848906  | TUMOR |

VEP annotated somatic variants

|                |                       |       |
|----------------|-----------------------|-------|
| T              | rs17180771            | TUMOR |
| T              | rs188362092           | TUMOR |
| G              | rs771999554,rs2120276 | TUMOR |
| T              | rs36018672            | TUMOR |
| T              | rs2181440             | TUMOR |
| A              | rs2071857             | TUMOR |
| T              | rs8142615             | TUMOR |
| G              | rs7292751             | TUMOR |
| T              | rs2239691             | TUMOR |
| A              | novel                 | TUMOR |
| G              | rs709683              | TUMOR |
| T              | rs2252767             | TUMOR |
| G              | rs1871685             | TUMOR |
| C              | rs2250718             | TUMOR |
| C              | rs2273707             | TUMOR |
| G              | rs2273706             | TUMOR |
| T              | rs79126103            | TUMOR |
| G              | rs10760503            | TUMOR |
| T              | novel                 | TUMOR |
| C              | rs3176889             | TUMOR |
| T              | rs145747095           | TUMOR |
| A              | rs377295148           | TUMOR |
| A              | rs6971720             | TUMOR |
| G              | rs2234922             | TUMOR |
| T              | rs13439459            | TUMOR |
| A              | rs16947425            | TUMOR |
| G              | rs2272313             | TUMOR |
| A              | rs10935282            | TUMOR |
| A              | rs1801591             | TUMOR |
| A              | rs1130426             | TUMOR |
| T              | rs3810381             | TUMOR |
| T              | rs41286811            | TUMOR |
| T              | rs2307003             | TUMOR |
| T              | rs12975442            | TUMOR |
| T              | rs79643517            | TUMOR |
| T              | rs1076871             | TUMOR |
| A              | novel                 | TUMOR |
| A              | rs1047840             | TUMOR |
| T              | novel                 | TUMOR |
| C              | rs56194802            | TUMOR |
| C              | rs1800291             | TUMOR |
| T              | rs7058826             | TUMOR |
| A              | rs137852271           | TUMOR |
| A              | rs4030473             | TUMOR |
| G              | rs174589              | TUMOR |
| G              | rs174453              | TUMOR |
| G              | rs733679              | TUMOR |
| A              | rs6007594             | TUMOR |
| CG             | novel                 | TUMOR |
| CCTAGATGCAGGAG | novel                 | TUMOR |
| C              | rs2475853             | TUMOR |
| T              | rs62599865            | TUMOR |
| C              | rs61703386            | TUMOR |
| A              | rs41305290            | TUMOR |
| A              | rs1939383             | TUMOR |

VEP annotated somatic variants

|                  |                       |       |
|------------------|-----------------------|-------|
| T                | rs3780                | TUMOR |
| G                | rs3733577             | TUMOR |
| A                | novel                 | TUMOR |
| G                | rs916668              | TUMOR |
| A                | rs2075566             | TUMOR |
| G                | rs10793625            | TUMOR |
| A                | rs771204              | TUMOR |
| G                | rs9358802             | TUMOR |
| T                | rs11555275            | TUMOR |
| A                | novel                 | TUMOR |
| G                | rs7757405             | TUMOR |
| G                | rs3800377             | TUMOR |
| C                | rs4713867             | TUMOR |
| C                | rs1052583             | TUMOR |
| C                | rs16843671            | TUMOR |
| T                | rs2240482             | TUMOR |
| A                | rs41283365            | TUMOR |
| A                | rs17848937            | TUMOR |
| A                | rs17848935            | TUMOR |
| T                | rs1127678             | TUMOR |
| T                | rs190206480           | TUMOR |
| C                | rs34167077            | TUMOR |
| A                | rs4883569             | TUMOR |
| A                | rs2066913             | TUMOR |
| A                | rs10973387            | TUMOR |
| G                | rs28401636            | TUMOR |
| A                | rs553196851           | TUMOR |
| T                | rs7630741             | TUMOR |
| T                | novel                 | TUMOR |
| T                | rs11119925            | TUMOR |
| A                | rs2287854             | TUMOR |
| A                | rs351855              | TUMOR |
| A                | rs1049636             | TUMOR |
| C                | rs1893433             | TUMOR |
| T                | rs3744903             | TUMOR |
| T                | rs1893434             | TUMOR |
| T                | rs774914442,rs2231901 | TUMOR |
| CCTTTTAAACAACCAG | novel                 | TUMOR |
| A                | rs56301507            | TUMOR |
| A                | rs6704545             | TUMOR |
| A                | rs36051194            | TUMOR |
| G                | rs2177153             | TUMOR |
| GGTTACCCTA       | rs3214903             | TUMOR |
| C                | rs12122068            | TUMOR |
| A                | rs6686353             | TUMOR |
| T                | rs1800822             | TUMOR |
| -                | rs67450550            | TUMOR |
| T                | rs7929014             | TUMOR |
| T                | rs294883              | TUMOR |
| G                | rs381639              | TUMOR |
| C                | rs2293783             | TUMOR |
| A                | rs4714489             | TUMOR |
| C                | rs10106               | TUMOR |
| C                | rs345514              | TUMOR |
| G                | rs35583270            | TUMOR |

VEP annotated somatic variants

|   |             |       |
|---|-------------|-------|
| T | rs11098194  | TUMOR |
| A | rs17457087  | TUMOR |
| T | rs34505482  | TUMOR |
| T | rs1545437   | TUMOR |
| T | rs74123100  | TUMOR |
| A | novel       | TUMOR |
| A | rs57337277  | TUMOR |
| T | rs117877479 | TUMOR |
| A | rs838137    | TUMOR |
| C | rs9807877   | TUMOR |
| C | rs529623    | TUMOR |
| C | rs1994490   | TUMOR |
| A | rs7617829   | TUMOR |
| T | rs1564281   | TUMOR |
| - | rs3830208   | TUMOR |
| A | rs12432149  | TUMOR |
| G | rs76999174  | TUMOR |
| T | rs76743658  | TUMOR |
| G | rs4958733   | TUMOR |
| T | rs2288101   | TUMOR |
| G | rs10849133  | TUMOR |
| T | rs1468556   | TUMOR |
| C | rs16962977  | TUMOR |
| A | rs16962974  | TUMOR |
| T | rs35950532  | TUMOR |
| C | novel       | TUMOR |
| A | rs3806338   | TUMOR |
| T | rs76346754  | TUMOR |
| A | rs61729628  | TUMOR |
| T | rs5384      | TUMOR |
| G | rs71548508  | TUMOR |
| G | rs17057536  | TUMOR |
| G | rs2293      | TUMOR |
| C | rs9971293   | TUMOR |
| G | rs10136536  | TUMOR |
| G | rs181881694 | TUMOR |
| T | rs1254898   | TUMOR |
| G | rs11083455  | TUMOR |
| A | rs56854837  | TUMOR |
| A | rs79309130  | TUMOR |
| A | rs147513433 | TUMOR |
| A | rs6076347   | TUMOR |
| A | rs2303275   | TUMOR |
| A | rs2303278   | TUMOR |
| T | rs764963799 | TUMOR |
| A | rs1049346   | TUMOR |
| C | rs4907817   | TUMOR |
| G | rs12844618  | TUMOR |
| A | rs79806135  | TUMOR |
| C | rs11229655  | TUMOR |
| T | rs4852349   | TUMOR |
| T | rs1805058   | TUMOR |
| T | rs5748449   | TUMOR |
| A | rs4986942   | TUMOR |
| A | rs12823938  | TUMOR |

VEP annotated somatic variants

|   |                       |       |
|---|-----------------------|-------|
| C | rs2243093             | TUMOR |
| A | rs2274020             | TUMOR |
| G | rs2793442             | TUMOR |
| - | novel                 | TUMOR |
| T | novel                 | TUMOR |
| A | rs1190736             | TUMOR |
| C | rs4838684             | TUMOR |
| T | rs147825070           | TUMOR |
| A | rs11101914            | TUMOR |
| A | rs12219529            | TUMOR |
| G | rs77245879            | TUMOR |
| C | rs10893053            | TUMOR |
| A | rs62265406            | TUMOR |
| A | rs2748338             | TUMOR |
| T | rs34212133            | TUMOR |
| A | rs116870369           | TUMOR |
| A | novel                 | TUMOR |
| T | rs3828595             | TUMOR |
| A | rs4475186             | TUMOR |
| A | rs41312596            | TUMOR |
| T | rs7614915             | TUMOR |
| C | rs34108640            | TUMOR |
| T | rs76463933            | TUMOR |
| T | rs974285              | TUMOR |
| T | rs757687772,rs1871042 | TUMOR |
| T | rs72681249            | TUMOR |
| T | rs12356612            | TUMOR |
| T | rs41260144            | TUMOR |
| A | rs616218              | TUMOR |
| A | rs1052278             | TUMOR |
| C | rs17676826            | TUMOR |
| T | novel                 | TUMOR |
| C | rs34922454            | TUMOR |
| C | rs6580637             | TUMOR |
| T | novel                 | TUMOR |
| A | rs2243388             | TUMOR |
| T | rs2379206             | TUMOR |
| A | rs56351858            | TUMOR |
| A | rs16833972            | TUMOR |
| T | rs3738541             | TUMOR |
| C | rs4720951             | TUMOR |
| A | novel                 | TUMOR |
| A | novel                 | TUMOR |
| C | rs12220588            | TUMOR |
| C | rs10882474            | TUMOR |
| T | rs2232253             | TUMOR |
| A | novel                 | TUMOR |
| G | rs1799945             | TUMOR |
| T | rs148714837           | TUMOR |
| C | rs74648342            | TUMOR |
| A | rs12436072            | TUMOR |
| T | rs12164               | TUMOR |
| A | novel                 | TUMOR |
| T | rs16891397            | TUMOR |
| T | rs77463023            | TUMOR |

VEP annotated somatic variants

|   |                       |       |
|---|-----------------------|-------|
| A | rs3752419             | TUMOR |
| - | rs775476188           | TUMOR |
| A | rs14362               | TUMOR |
| T | rs2073420             | TUMOR |
| - | rs546127026           | TUMOR |
| T | rs1131488             | TUMOR |
| A | rs2272790             | TUMOR |
| T | rs1053593             | TUMOR |
| A | rs2071190             | TUMOR |
| A | rs77856552            | TUMOR |
| T | rs35337531            | TUMOR |
| C | rs3830343             | TUMOR |
| A | rs3737243             | TUMOR |
| T | novel                 | TUMOR |
| A | rs6320                | TUMOR |
| C | rs6638360             | TUMOR |
| T | rs200650762           | TUMOR |
| T | rs11558819            | TUMOR |
| T | novel                 | TUMOR |
| G | rs1048710             | TUMOR |
| C | rs540557518           | TUMOR |
| G | rs12904700            | TUMOR |
| C | rs866484              | TUMOR |
| G | rs1051393             | TUMOR |
| G | rs33982004            | TUMOR |
| G | rs609207              | TUMOR |
| A | rs2297370             | TUMOR |
| A | rs2274849             | TUMOR |
| T | rs34297802            | TUMOR |
| C | rs1128617             | TUMOR |
| G | rs4830219             | TUMOR |
| A | novel                 | TUMOR |
| A | rs6782002             | TUMOR |
| A | rs36052974            | TUMOR |
| G | rs9848979             | TUMOR |
| C | rs61886896            | TUMOR |
| - | rs139927942           | TUMOR |
| G | rs1063110             | TUMOR |
| - | rs35444385,rs57179462 | TUMOR |
| T | rs146644651           | TUMOR |
| T | rs41268137            | TUMOR |
| T | rs12722600            | TUMOR |
| C | rs143249661           | TUMOR |
| A | rs3842752             | TUMOR |
| G | rs3741211             | TUMOR |
| T | rs2059806             | TUMOR |
| G | rs2860177             | TUMOR |
| A | rs11761394            | TUMOR |
| A | novel                 | TUMOR |
| A | novel                 | TUMOR |
| G | rs3797390             | TUMOR |
| - | rs768211373           | TUMOR |
| A | rs2291919             | TUMOR |
| A | rs75282194            | TUMOR |
| C | rs34051422            | TUMOR |

VEP annotated somatic variants

|                  |             |       |
|------------------|-------------|-------|
| G                | rs1109216   | TUMOR |
| C                | rs2274617   | TUMOR |
| C                | rs2305586   | TUMOR |
| A                | rs3821909   | TUMOR |
| C                | rs2239547   | TUMOR |
| T                | rs2276817   | TUMOR |
| C                | rs2240917   | TUMOR |
| G                | rs1751134   | TUMOR |
| C                | rs41307668  | TUMOR |
| T                | rs7957289   | TUMOR |
| GAAGCTG          | novel       | TUMOR |
| A                | rs78399616  | TUMOR |
| A                | rs34043167  | TUMOR |
| A                | rs2298681   | TUMOR |
| C                | rs2073366   | TUMOR |
| T                | rs11098988  | TUMOR |
| A                | rs5952987   | TUMOR |
| G                | rs9419380   | TUMOR |
| A                | rs13214720  | TUMOR |
| G                | rs2076056   | TUMOR |
| T                | rs742099    | TUMOR |
| -                | rs10545425  | TUMOR |
| T                | rs17369029  | TUMOR |
| G                | rs41289438  | TUMOR |
| A                | rs17855078  | TUMOR |
| A                | rs10889315  | TUMOR |
| T                | rs9800580   | TUMOR |
| C                | rs1611775   | TUMOR |
| A                | novel       | TUMOR |
| T                | rs16885430  | TUMOR |
| T                | rs12706859  | TUMOR |
| C                | rs80095910  | TUMOR |
| A                | rs9534059   | TUMOR |
| A                | rs41300795  | TUMOR |
| A                | novel       | TUMOR |
| T                | rs141093070 | TUMOR |
| T                | novel       | TUMOR |
| A                | rs2230018   | TUMOR |
| G                | rs59225858  | TUMOR |
| G                | rs1062277   | TUMOR |
| T                | rs6950119   | TUMOR |
| A                | rs11913944  | TUMOR |
| A                | rs68107102  | TUMOR |
| G                | rs7764091   | TUMOR |
| -                | rs147073742 | TUMOR |
| A                | rs138496842 | TUMOR |
| A                | rs757731918 | TUMOR |
| A                | rs114902761 | TUMOR |
| A                | rs12046928  | TUMOR |
| T                | rs72852205  | TUMOR |
| TTAATCATGGGCCTCC | novel       | TUMOR |
| A                | novel       | TUMOR |
| -                | novel       | TUMOR |
| T                | rs16862956  | TUMOR |
| C                | rs3736968   | TUMOR |



VEP annotated somatic variants

|                   |                       |       |
|-------------------|-----------------------|-------|
| G                 | rs11552577            | TUMOR |
| G                 | rs202185247           | TUMOR |
| A                 | novel                 | TUMOR |
| A                 | novel                 | TUMOR |
| C                 | rs149140699           | TUMOR |
| A                 | rs9418941             | TUMOR |
| G                 | rs7307735             | TUMOR |
| T                 | rs10953283            | TUMOR |
| A                 | rs190427523           | TUMOR |
| T                 | rs34946378            | TUMOR |
| T                 | rs543603727           | TUMOR |
| C                 | rs2604958             | TUMOR |
| A                 | rs2071602             | TUMOR |
| C                 | rs463217              | TUMOR |
| C                 | rs9306112             | TUMOR |
| G                 | rs9984726             | TUMOR |
| T                 | rs73176644            | TUMOR |
| -                 | rs3841288             | TUMOR |
| G                 | rs74936600            | TUMOR |
| A                 | rs9374309             | TUMOR |
| T                 | rs6908219             | TUMOR |
| A                 | rs2296300             | TUMOR |
| C                 | rs6672093             | TUMOR |
| A                 | rs2296299             | TUMOR |
| A                 | rs684527              | TUMOR |
| G                 | rs3798761             | TUMOR |
| T                 | novel                 | TUMOR |
| (GGTGCAGGTGACCTG( | novel                 | TUMOR |
| A                 | rs6695528             | TUMOR |
| A                 | rs11610822            | TUMOR |
| A                 | rs893239              | TUMOR |
| T                 | rs36068997            | TUMOR |
| A                 | rs575867042           | TUMOR |
| T                 | rs7258841             | TUMOR |
| T                 | novel                 | TUMOR |
| A                 | rs7334674             | TUMOR |
| A                 | novel                 | TUMOR |
| -                 | novel                 | TUMOR |
| C                 | rs3813933             | TUMOR |
| G                 | rs182548747           | TUMOR |
| C                 | rs750695318,rs2304720 | TUMOR |
| G                 | rs9877192             | TUMOR |
| C                 | rs10771166            | TUMOR |
| A                 | rs13387241            | TUMOR |
| T                 | rs2242339             | TUMOR |
| A                 | rs138879160           | TUMOR |
| A                 | rs139839409           | TUMOR |
| A                 | rs1741547             | TUMOR |
| T                 | rs2354444             | TUMOR |
| A                 | rs7094610             | TUMOR |
| G                 | rs78140568            | TUMOR |
| A                 | novel                 | TUMOR |
| G                 | rs34423045            | TUMOR |
| A                 | rs36006556            | TUMOR |
| G                 | rs7745                | TUMOR |

VEP annotated somatic variants

|   |             |       |
|---|-------------|-------|
| T | rs2839146   | TUMOR |
| A | rs2274800   | TUMOR |
| C | rs75340045  | TUMOR |
| T | rs4130852   | TUMOR |
| G | rs41308397  | TUMOR |
| G | rs807023    | TUMOR |
| T | rs752974    | TUMOR |
| C | rs73048940  | TUMOR |
| C | rs2908989   | TUMOR |
| C | rs2070945   | TUMOR |
| C | rs2233055   | TUMOR |
| T | rs770941569 | TUMOR |
| C | rs5953637   | TUMOR |
| T | rs3765272   | TUMOR |
| A | novel       | TUMOR |
| A | novel       | TUMOR |
| T | rs113311895 | TUMOR |
| G | rs2142887   | TUMOR |
| A | rs6894260   | TUMOR |
| C | rs2301796   | TUMOR |
| T | novel       | TUMOR |
| T | rs5909299   | TUMOR |
| T | rs74430817  | TUMOR |
| C | rs56072295  | TUMOR |
| G | rs55715763  | TUMOR |
| - | rs72288687  | TUMOR |
| C | rs2290689   | TUMOR |
| C | rs1078264   | TUMOR |
| G | rs4502771   | TUMOR |
| T | rs2072788   | TUMOR |
| G | rs2270969   | TUMOR |
| A | rs2250213   | TUMOR |
| T | rs13204070  | TUMOR |
| T | novel       | TUMOR |
| T | novel       | TUMOR |
| A | rs61751446  | TUMOR |
| T | novel       | TUMOR |
| C | rs616836    | TUMOR |
| C | rs3745480   | TUMOR |
| C | rs147500056 | TUMOR |
| A | novel       | TUMOR |
| C | rs368622121 | TUMOR |
| G | rs673408    | TUMOR |
| T | rs147500027 | TUMOR |
| T | rs1263792   | TUMOR |
| T | rs13023973  | TUMOR |
| A | rs878493    | TUMOR |
| A | rs8081793   | TUMOR |
| A | rs8067585   | TUMOR |
| T | rs79286496  | TUMOR |
| T | rs12917     | TUMOR |
| A | rs3213927   | TUMOR |
| A | rs2289718   | TUMOR |
| G | rs3747032   | TUMOR |
| T | rs73492943  | TUMOR |

VEP annotated somatic variants

|        |                        |       |
|--------|------------------------|-------|
| C      | rs142531662            | TUMOR |
| C      | rs2302320              | TUMOR |
| T      | rs7964786              | TUMOR |
| G      | rs10489691             | TUMOR |
| T      | rs2227261              | TUMOR |
| A      | rs7922546              | TUMOR |
| G      | rs77813062             | TUMOR |
| G      | rs141042584            | TUMOR |
| T      | rs12012022             | TUMOR |
| A      | rs6622126              | TUMOR |
| T      | rs6495341              | TUMOR |
| A      | rs1793141              | TUMOR |
| T      | rs496797               | TUMOR |
| G      | rs1655519              | TUMOR |
| G      | rs570218               | TUMOR |
| C      | rs480963               | TUMOR |
| G      | rs3809869              | TUMOR |
| A      | novel                  | TUMOR |
| A      | rs181211282            | TUMOR |
| T      | rs34547023             | TUMOR |
| T      | rs11042902             | TUMOR |
| -      | novel                  | TUMOR |
| T      | rs12501541             | TUMOR |
| T      | rs11121691             | TUMOR |
| G      | rs2229276              | TUMOR |
| T      | rs3820571              | TUMOR |
| G      | rs3820568              | TUMOR |
| A      | rs2297965              | TUMOR |
| -      | rs34883891             | TUMOR |
| GGGAGA | rs111427194            | TUMOR |
| C      | rs1609459              | TUMOR |
| C      | rs10878538             | TUMOR |
| A      | rs3751175              | TUMOR |
| C      | rs7480563              | TUMOR |
| A      | rs12935454             | TUMOR |
| G      | rs1635235              | TUMOR |
| A      | rs4796854              | TUMOR |
| -      | rs11570050,rs181840234 | TUMOR |
| T      | rs16967494             | TUMOR |
| C      | rs3957557              | TUMOR |
| T      | rs735711               | TUMOR |
| T      | novel                  | TUMOR |
| C      | rs7159367              | TUMOR |
| T      | rs772285227            | TUMOR |
| A      | rs40305                | TUMOR |
| T      | novel                  | TUMOR |
| C      | rs2072012              | TUMOR |
| T      | rs72818342             | TUMOR |
| C      | rs10408143             | TUMOR |
| T      | novel                  | TUMOR |
| C      | rs56397652             | TUMOR |
| G      | rs4950877              | TUMOR |
| T      | rs145701607            | TUMOR |
| C      | rs174536               | TUMOR |
| G      | novel                  | TUMOR |

VEP annotated somatic variants

|   |             |       |
|---|-------------|-------|
| A | novel       | TUMOR |
| T | rs2275107   | TUMOR |
| A | novel       | TUMOR |
| T | rs11670727  | TUMOR |
| G | rs878907    | TUMOR |
| T | rs1318102   | TUMOR |
| G | rs8482      | TUMOR |
| T | rs35995789  | TUMOR |
| C | rs11657883  | TUMOR |
| A | rs11653231  | TUMOR |
| T | rs2228603   | TUMOR |
| T | rs73044244  | TUMOR |
| T | rs375430154 | TUMOR |
| A | rs114443303 | TUMOR |
| A | rs6087625   | TUMOR |
| A | rs1079533   | TUMOR |
| T | rs1136207   | TUMOR |
| A | novel       | TUMOR |
| C | rs6433569   | TUMOR |
| C | rs4300824   | TUMOR |
| T | rs2234570   | TUMOR |
| C | rs4804      | TUMOR |
| G | rs2275712   | TUMOR |
| C | rs201763096 | TUMOR |
| T | rs4648073   | TUMOR |
| A | novel       | TUMOR |
| G | rs587555    | TUMOR |
| G | rs115931931 | TUMOR |
| G | rs10457670  | TUMOR |
| T | novel       | TUMOR |
| A | novel       | TUMOR |
| A | novel       | TUMOR |
| G | rs6860507   | TUMOR |
| A | novel       | TUMOR |
| T | rs456285    | TUMOR |
| A | rs149560096 | TUMOR |
| G | rs61755040  | TUMOR |
| G | rs2233442   | TUMOR |
| - | rs376045897 | TUMOR |
| C | rs17646552  | TUMOR |
| T | rs61732213  | TUMOR |
| A | rs74763333  | TUMOR |
| A | rs117307800 | TUMOR |
| G | rs11246947  | TUMOR |
| A | rs10813983  | TUMOR |
| A | rs1263337   | TUMOR |
| G | rs11553611  | TUMOR |
| T | rs905721    | TUMOR |
| G | rs1799983   | TUMOR |
| C | novel       | TUMOR |
| G | rs12344155  | TUMOR |
| T | rs11574894  | TUMOR |
| G | rs217434    | TUMOR |
| G | rs3812694   | TUMOR |
| G | rs727162    | TUMOR |

VEP annotated somatic variants

|                   |                       |       |
|-------------------|-----------------------|-------|
| IGATCCGCCTGCCTTG/ | novel                 | TUMOR |
| G                 | rs7644275             | TUMOR |
| -                 | rs773872527           | TUMOR |
| T                 | rs144139217           | TUMOR |
| C                 | rs28932181            | TUMOR |
| A                 | rs2303707             | TUMOR |
| T                 | rs142803792           | TUMOR |
| C                 | rs79891871            | TUMOR |
| A                 | rs11550029            | TUMOR |
| A                 | rs1175392             | TUMOR |
| T                 | rs10093400            | TUMOR |
| C                 | novel                 | TUMOR |
| A                 | rs11244329            | TUMOR |
| G                 | rs10872646            | TUMOR |
| -                 | rs141363348           | TUMOR |
| -                 | rs10567712            | TUMOR |
| T                 | rs7657846             | TUMOR |
| T                 | rs1806222             | TUMOR |
| A                 | rs748486              | TUMOR |
| C                 | rs1029305             | TUMOR |
| C                 | rs2027833             | TUMOR |
| T                 | rs202009336,rs2027831 | TUMOR |
| C                 | rs2027832             | TUMOR |
| C                 | rs2295478             | TUMOR |
| G                 | rs2294695             | TUMOR |
| A                 | rs115194510           | TUMOR |
| A                 | rs11903               | TUMOR |
| T                 | rs3826861             | TUMOR |
| G                 | rs1025576             | TUMOR |
| T                 | rs703903              | TUMOR |
| A                 | rs7121804             | TUMOR |
| T                 | rs61890335            | TUMOR |
| T                 | rs56352135            | TUMOR |
| A                 | rs12283334            | TUMOR |
| G                 | rs10838637            | TUMOR |
| C                 | rs7145814             | TUMOR |
| A                 | rs115424559           | TUMOR |
| A                 | rs4465383             | TUMOR |
| G                 | rs74782118            | TUMOR |
| T                 | rs2297594             | TUMOR |
| G                 | rs733728              | TUMOR |
| G                 | rs173776              | TUMOR |
| -                 | novel                 | TUMOR |
| G                 | rs57131062            | TUMOR |
| AGC               | rs148216086           | TUMOR |
| G                 | rs1152187             | TUMOR |
| A                 | rs2070871             | TUMOR |
| C                 | novel                 | TUMOR |
| T                 | rs55701638            | TUMOR |
| A                 | rs5914274             | TUMOR |
| A                 | rs10408458            | TUMOR |
| A                 | rs62620049            | TUMOR |
| G                 | rs11185826            | TUMOR |
| A                 | rs7535528             | TUMOR |
| A                 | rs760781025           | TUMOR |

VEP annotated somatic variants

|                    |             |       |
|--------------------|-------------|-------|
| A                  | rs11577368  | TUMOR |
| T                  | rs11547363  | TUMOR |
| G                  | rs41302597  | TUMOR |
| G                  | rs13007173  | TUMOR |
| G                  | rs6927706   | TUMOR |
| G                  | rs3812657   | TUMOR |
| A                  | rs766854336 | TUMOR |
| A                  | rs12707531  | TUMOR |
| A                  | rs4816      | TUMOR |
| A                  | rs78561636  | TUMOR |
| T                  | rs2241988   | TUMOR |
| G                  | rs74436253  | TUMOR |
| A                  | rs392565    | TUMOR |
| A                  | rs1131978   | TUMOR |
| T                  | novel       | TUMOR |
| C                  | rs246388    | TUMOR |
| C                  | rs246391    | TUMOR |
| C                  | rs1780192   | TUMOR |
| G                  | rs4985155   | TUMOR |
| G                  | rs2740      | TUMOR |
| -                  | rs34125357  | TUMOR |
| G                  | rs1867780   | TUMOR |
| G                  | rs6676171   | TUMOR |
| A                  | rs12407843  | TUMOR |
| C                  | rs6671392   | TUMOR |
| A                  | rs17570     | TUMOR |
| G                  | rs1061338   | TUMOR |
| G                  | rs2306304   | TUMOR |
| T                  | rs2306301   | TUMOR |
| A                  | novel       | TUMOR |
| C                  | rs17303413  | TUMOR |
| T                  | rs34440547  | TUMOR |
| G                  | rs3006473   | TUMOR |
| T                  | rs3750354   | TUMOR |
| :TTCATCTCTGATGGGA` | novel       | TUMOR |
| -                  | novel       | TUMOR |
| A                  | novel       | TUMOR |
| A                  | rs12800061  | TUMOR |
| G                  | rs1668      | TUMOR |
| C                  | rs7531782   | TUMOR |
| G                  | rs17714063  | TUMOR |
| G                  | rs72818370  | TUMOR |
| G                  | rs4791765   | TUMOR |
| A                  | novel       | TUMOR |
| A                  | rs11541025  | TUMOR |
| G                  | rs5751975   | TUMOR |
| A                  | rs3761646   | TUMOR |
| C                  | rs734823    | TUMOR |
| T                  | rs9370067   | TUMOR |
| C                  | rs7967264   | TUMOR |
| A                  | novel       | TUMOR |
| T                  | rs2020923   | TUMOR |
| A                  | novel       | TUMOR |
| A                  | rs3740365   | TUMOR |
| G                  | rs10786156  | TUMOR |

VEP annotated somatic variants

|                   |                      |       |
|-------------------|----------------------|-------|
| T                 | rs3831084            | TUMOR |
| T                 | rs3765524            | TUMOR |
| C                 | rs4072830            | TUMOR |
| G                 | rs12727342           | TUMOR |
| C                 | rs10752744           | TUMOR |
| C                 | rs55895668           | TUMOR |
| G                 | rs6993938            | TUMOR |
| A                 | rs1065837            | TUMOR |
| A                 | rs11777402           | TUMOR |
| G                 | rs7014582            | TUMOR |
| G                 | rs7819099            | TUMOR |
| T                 | novel                | TUMOR |
| T                 | rs6573782            | TUMOR |
| C                 | rs1555400            | TUMOR |
| G                 | rs749271             | TUMOR |
| A                 | rs28687780           | TUMOR |
| GGCGTGGGGTCCCT    | rs139924905          | TUMOR |
| A                 | rs3744078            | TUMOR |
| T                 | rs55709850           | TUMOR |
| ;TATAATTTTAAACTAT | novel                | TUMOR |
| T                 | rs12197079           | TUMOR |
| C                 | rs2294917            | TUMOR |
| A                 | rs8107538            | TUMOR |
| -                 | rs67346689           | TUMOR |
| A                 | novel                | TUMOR |
| T                 | novel                | TUMOR |
| G                 | rs2424213            | TUMOR |
| A                 | rs7986347            | TUMOR |
| C                 | rs13273814           | TUMOR |
| G                 | rs1801282            | TUMOR |
| T                 | rs3856806            | TUMOR |
| C                 | rs1669112            | TUMOR |
| GAACCC            | rs201186780          | TUMOR |
| G                 | rs2301287            | TUMOR |
| A                 | rs34856581           | TUMOR |
| C                 | rs7894               | TUMOR |
| TGTTTTGTTT        | rs113986045          | TUMOR |
| T                 | rs741932             | TUMOR |
| A                 | rs2136998            | TUMOR |
| A                 | rs11099079           | TUMOR |
| C                 | rs496067             | TUMOR |
| T                 | rs201600914,rs513572 | TUMOR |
| C                 | rs513573             | TUMOR |
| G                 | rs880177             | TUMOR |
| G                 | rs12544121           | TUMOR |
| G                 | rs3741089            | TUMOR |
| C                 | novel                | TUMOR |
| A                 | rs45596236           | TUMOR |
| -                 | rs67531107           | TUMOR |
| A                 | rs384726             | TUMOR |
| A                 | novel                | TUMOR |
| A                 | rs141874203          | TUMOR |
| T                 | rs3761484            | TUMOR |
| A                 | rs9626578            | TUMOR |
| AAACAAAC          | rs150305650          | TUMOR |

VEP annotated somatic variants

|          |                        |       |
|----------|------------------------|-------|
| -        | rs550887876            | TUMOR |
| A        | rs144556615            | TUMOR |
| A        | rs59007873             | TUMOR |
| C        | rs2072284              | TUMOR |
| G        | rs62086002             | TUMOR |
| C        | rs2142111              | TUMOR |
| G        | rs3809916              | TUMOR |
| A        | rs2273786              | TUMOR |
| G        | rs41282874             | TUMOR |
| A        | novel                  | TUMOR |
| C        | rs3821880              | TUMOR |
| G        | rs4341027              | TUMOR |
| A        | rs17853260             | TUMOR |
| A        | rs12928073             | TUMOR |
| G        | rs116992433            | TUMOR |
| A        | rs117568247            | TUMOR |
| C        | rs138666431            | TUMOR |
| GC       | rs201905426            | TUMOR |
| A        | novel                  | TUMOR |
| C        | rs765051702,rs2058464  | TUMOR |
| G        | rs3744619              | TUMOR |
| G        | rs3751112              | TUMOR |
| A        | rs3812730              | TUMOR |
| G        | rs1626469              | TUMOR |
| A        | rs11871517             | TUMOR |
| A        | rs14193                | TUMOR |
| TTCCACG  | rs145796187            | TUMOR |
| G        | rs17783124             | TUMOR |
| G        | rs2306919              | TUMOR |
| A        | rs3729931              | TUMOR |
| A        | rs533403212            | TUMOR |
| A        | rs1767443              | TUMOR |
| C        | rs10875687             | TUMOR |
| -        | rs776781597,rs34729771 | TUMOR |
| T        | rs201983107            | TUMOR |
| C        | rs367680909            | TUMOR |
| A        | rs9530901              | TUMOR |
| T        | rs2963925              | TUMOR |
| C        | rs7813046              | TUMOR |
| G        | rs11788747             | TUMOR |
| -        | rs150557566            | TUMOR |
| G        | rs6899737              | TUMOR |
| GGGGATTA | rs5851607              | TUMOR |
| G        | rs465736               | TUMOR |
| C        | rs11242                | TUMOR |
| A        | rs2581786              | TUMOR |
| C        | rs1546650              | TUMOR |
| T        | rs1549168              | TUMOR |
| C        | rs2275742              | TUMOR |
| A        | rs2272805              | TUMOR |
| T        | rs7276592              | TUMOR |
| AA       | rs3840984              | TUMOR |
| T        | rs76239019             | TUMOR |
| T        | rs55668927             | TUMOR |
| T        |                        | TUMOR |



VEP annotated somatic variants

|                   |                        |       |
|-------------------|------------------------|-------|
| T                 | rs12944458             | TUMOR |
| -                 | rs374247435,rs33952548 | TUMOR |
| A                 | rs144040326            | TUMOR |
| T                 | novel                  | TUMOR |
| C                 | rs9864412              | TUMOR |
| A                 | rs967454               | TUMOR |
| T                 | rs2230774              | TUMOR |
| A                 | rs11208364             | TUMOR |
| G                 | rs1535330              | TUMOR |
| T                 | rs193084032            | TUMOR |
| C                 | rs2224797,rs111914364  | TUMOR |
| A                 | rs7900838              | TUMOR |
| C                 | rs7968684              | TUMOR |
| A                 | rs486089               | TUMOR |
| T                 | rs7136561              | TUMOR |
| A                 | rs12947988             | TUMOR |
| C                 | rs73020697             | TUMOR |
| CC                | novel                  | TUMOR |
| AAATGAGCAGGGATTT/ | novel                  | TUMOR |
| T                 | rs6509                 | TUMOR |
| T                 | rs7580                 | TUMOR |
| G                 | rs6932660              | TUMOR |
| T                 | rs7217786              | TUMOR |
| T                 | rs2271603              | TUMOR |
| A                 | rs2838344              | TUMOR |
| A                 | rs2155722              | TUMOR |
| G                 | rs7210579              | TUMOR |
| C                 | rs3765595              | TUMOR |
| C                 | rs542998               | TUMOR |
| T                 | rs12658664             | TUMOR |
| C                 | rs11541392             | TUMOR |
| C                 | rs7098448              | TUMOR |
| A                 | rs1805343              | TUMOR |
| T                 | rs11083462             | TUMOR |
| A                 | rs3745843              | TUMOR |
| T                 | rs75181912             | TUMOR |
| A                 | rs777579024            | TUMOR |
| A                 | rs10754602             | TUMOR |
| T                 | rs791541               | TUMOR |
| A                 | rs41279198             | TUMOR |
| G                 | rs11147974             | TUMOR |
| A                 | novel                  | TUMOR |
| C                 | rs11763269,rs56059694  | TUMOR |
| G                 | rs1053744              | TUMOR |
| A                 | rs11042500             | TUMOR |
| T                 | rs776039654            | TUMOR |
| T                 | rs1142287              | TUMOR |
| T                 | rs882745               | TUMOR |
| C                 | novel                  | TUMOR |
| G                 | rs2240572              | TUMOR |
| A                 | rs35006492             | TUMOR |
| A                 | rs167618               | TUMOR |
| C                 | rs1546961              | TUMOR |
| T                 | rs3731760              | TUMOR |
| G                 | rs6746030              | TUMOR |

VEP annotated somatic variants

|                |             |       |
|----------------|-------------|-------|
| T              | rs10180721  | TUMOR |
| T              | rs73100512  | TUMOR |
| C              | rs3801066   | TUMOR |
| T              | rs530168313 | TUMOR |
| A              | rs9608973   | TUMOR |
| A              | rs6695715   | TUMOR |
| G              | rs2273526   | TUMOR |
| A              | rs2303513   | TUMOR |
| -              | rs3830973   | TUMOR |
| G              | rs3750630   | TUMOR |
| G              | rs3763695   | TUMOR |
| T              | rs9420792   | TUMOR |
| T              | rs117852708 | TUMOR |
| C              | rs61738919  | TUMOR |
| G              | rs5362      | TUMOR |
| A              | rs17522707  | TUMOR |
| C              | rs1990044   | TUMOR |
| G              | rs17241389  | TUMOR |
| G              | rs6446202   | TUMOR |
| A              | rs1062753   | TUMOR |
| C              | rs9323910   | TUMOR |
| C              | rs268686    | TUMOR |
| A              | novel       | TUMOR |
| A              | novel       | TUMOR |
| A              | novel       | TUMOR |
| C              | rs35377445  | TUMOR |
| A              | rs7197262   | TUMOR |
| A              | rs147508693 | TUMOR |
| -              | rs3998628   | TUMOR |
| C              | rs2429908   | TUMOR |
| C              | rs2447099   | TUMOR |
| A              | rs143734853 | TUMOR |
| A              | rs7805      | TUMOR |
| C              | rs3740471   | TUMOR |
| T              | rs187882127 | TUMOR |
| T              | rs41275786  | TUMOR |
| T              | rs1233555   | TUMOR |
| A              | rs199645557 | TUMOR |
| T              | rs3810108   | TUMOR |
| AACTATATCAAAGT | novel       | TUMOR |
| C              | rs9982519   | TUMOR |
| C              | rs12145798  | TUMOR |
| T              | rs11581248  | TUMOR |
| A              | rs779111224 | TUMOR |
| C              | rs13106574  | TUMOR |
| A              | novel       | TUMOR |
| G              | rs11976455  | TUMOR |
| C              | rs6647476   | TUMOR |
| T              | rs2269914   | TUMOR |
| A              | rs11668879  | TUMOR |
| C              | rs2631365   | TUMOR |
| T              | novel       | TUMOR |
| C              | rs941650    | TUMOR |
| ATGATGTTGTC    | novel       | TUMOR |
| T              | rs12942600  | TUMOR |

VEP annotated somatic variants

|   |             |       |
|---|-------------|-------|
| T | rs112153156 | TUMOR |
| T | rs145107782 | TUMOR |
| C | rs4980349   | TUMOR |
| - | novel       | TUMOR |
| T | rs41302651  | TUMOR |
| A | rs34664116  | TUMOR |
| A | rs205966    | TUMOR |
| A | rs35870005  | TUMOR |
| G | rs948270    | TUMOR |
| G | rs78020607  | TUMOR |
| T | novel       | TUMOR |
| A | rs2288998   | TUMOR |
| A | rs12703112  | TUMOR |
| G | rs4808709   | TUMOR |
| G | rs10521578  | TUMOR |
| T | rs2278405   | TUMOR |
| T | rs6354      | TUMOR |
| A | rs2248253   | TUMOR |
| T | rs1569951   | TUMOR |
| A | rs17183863  | TUMOR |
| G | rs1056846   | TUMOR |
| - | novel       | TUMOR |
| A | novel       | TUMOR |
| - | novel       | TUMOR |
| T | rs11090629  | TUMOR |
| A | rs3742909   | TUMOR |
| A | rs917208    | TUMOR |
| T | rs12065652  | TUMOR |
| A | novel       | TUMOR |
| A | rs1544402   | TUMOR |
| G | rs10754367  | TUMOR |
| A | rs12142616  | TUMOR |
| T | rs5908761   | TUMOR |
| A | novel       | TUMOR |
| G | rs875097    | TUMOR |
| G | novel       | TUMOR |
| C | rs11548457  | TUMOR |
| T | rs2306324   | TUMOR |
| T | novel       | TUMOR |
| A | rs58090119  | TUMOR |
| G | rs117804715 | TUMOR |
| T | rs12536873  | TUMOR |
| T | rs55776327  | TUMOR |
| C | rs1008335   | TUMOR |
| - | novel       | TUMOR |
| T | rs139731922 | TUMOR |
| A | novel       | TUMOR |
| G | rs7207173   | TUMOR |
| - | novel       | TUMOR |
| C | rs697210    | TUMOR |
| - | novel       | TUMOR |
| T | rs11556615  | TUMOR |
| A | novel       | TUMOR |
| G | rs557622174 | TUMOR |
| - | novel       | TUMOR |

VEP annotated somatic variants

|            |             |       |
|------------|-------------|-------|
| G          | rs3780015   | TUMOR |
| C          | rs10851866  | TUMOR |
| A          | rs3934983   | TUMOR |
| T          | rs58802664  | TUMOR |
| -          | rs746073071 | TUMOR |
| G          | rs1834      | TUMOR |
| G          | rs34275118  | TUMOR |
| C          | rs41285881  | TUMOR |
| C          | rs3759259   | TUMOR |
| A          | novel       | TUMOR |
| A          | novel       | TUMOR |
| C          | rs13050872  | TUMOR |
| A          | rs237025    | TUMOR |
| A          | rs4803244   | TUMOR |
| T          | rs1529733   | TUMOR |
| G          | rs4341217   | TUMOR |
| G          | rs1390679   | TUMOR |
| C          | rs1132645   | TUMOR |
| T          | novel       | TUMOR |
| C          | rs33976862  | TUMOR |
| C          | rs74413846  | TUMOR |
| T          | rs1744177   | TUMOR |
| T          | rs3743244   | TUMOR |
| C          | rs12645298  | TUMOR |
| A          | rs3734296   | TUMOR |
| T          | rs237028    | TUMOR |
| A          | rs17680881  | TUMOR |
| C          | rs3788764   | TUMOR |
| T          | rs2073138   | TUMOR |
| A          | rs35105682  | TUMOR |
| T          | rs572705    | TUMOR |
| C          | rs606511    | TUMOR |
| A          | rs394558    | TUMOR |
| T          | rs3217211   | TUMOR |
| T          | rs146025212 | TUMOR |
| T          | rs9573565   | TUMOR |
| C          | rs1138454   | TUMOR |
| G          | novel       | TUMOR |
| A          | rs59223436  | TUMOR |
| C          | rs5944856   | TUMOR |
| C          | novel       | TUMOR |
| T          | rs10044956  | TUMOR |
| T          | rs12169610  | TUMOR |
| T          | rs11851097  | TUMOR |
| -          | rs530289129 | TUMOR |
| T          | novel       | TUMOR |
| G          | rs251796    | TUMOR |
| GACATGCCAC | novel       | TUMOR |
| T          | rs302858    | TUMOR |
| C          | rs118141221 | TUMOR |
| A          | rs12857479  | TUMOR |
| T          | rs324356    | TUMOR |
| T          | rs199687528 | TUMOR |
| A          | rs12609379  | TUMOR |
| G          | rs11165376  | TUMOR |

VEP annotated somatic variants

|                  |             |       |
|------------------|-------------|-------|
| A                | rs2290380   | TUMOR |
| G                | rs513970    | TUMOR |
| A                | rs6605530   | TUMOR |
| -                | rs3214576   | TUMOR |
| C                | rs2074603   | TUMOR |
| C                | novel       | TUMOR |
| -                | novel       | TUMOR |
| A                | novel       | TUMOR |
| A                | rs41284222  | TUMOR |
| A                | rs2292151   | TUMOR |
| C                | novel       | TUMOR |
| C                | rs200152166 | TUMOR |
| T                | rs2279322   | TUMOR |
| A                | novel       | TUMOR |
| T                | rs2228178   | TUMOR |
| C                | rs8036209   | TUMOR |
| A                | novel       | TUMOR |
| G                | rs2291822   | TUMOR |
| C                | rs77173980  | TUMOR |
| G                | rs12252784  | TUMOR |
| A                | rs61741039  | TUMOR |
| -                | rs144703742 | TUMOR |
| T                | novel       | TUMOR |
| G                | rs76116020  | TUMOR |
| A                | rs895438    | TUMOR |
| A                | rs3800592   | TUMOR |
| C                | rs2276884   | TUMOR |
| C                | rs5936308   | TUMOR |
| -                | novel       | TUMOR |
| G                | rs147529920 | TUMOR |
| T                | rs12646286  | TUMOR |
| C                | rs661561    | TUMOR |
| T                | rs3181195   | TUMOR |
| G                | rs12531309  | TUMOR |
| A                | rs34377860  | TUMOR |
| T                | rs2290207   | TUMOR |
| C                | rs560191    | TUMOR |
| G                | rs2602141   | TUMOR |
| G                | rs16957730  | TUMOR |
| T                | rs1045781   | TUMOR |
| GAAGTACCCAGGGTAC | novel       | TUMOR |
| G                | rs1697964   | TUMOR |
| C                | rs1697963   | TUMOR |
| A                | novel       | TUMOR |
| T                | rs10410833  | TUMOR |
| T                | rs9322994   | TUMOR |
| C                | rs12147991  | TUMOR |
| T                | rs2295275   | TUMOR |
| C                | rs3020967   | TUMOR |
| T                | rs1029237   | TUMOR |
| A                | rs2269553   | TUMOR |
| A                | rs4971059   | TUMOR |
| T                | rs35622844  | TUMOR |
| G                | rs114415891 | TUMOR |
| T                | rs2297889   | TUMOR |

VEP annotated somatic variants

|                |             |       |
|----------------|-------------|-------|
| CACACAGGTGTTTT | rs11268748  | TUMOR |
| C              | rs30774     | TUMOR |
| T              | rs200889110 | TUMOR |
| C              | rs148858467 | TUMOR |
| C              | rs7885599   | TUMOR |
| T              | rs1885117   | TUMOR |
| C              | rs12906081  | TUMOR |
| A              | rs34350821  | TUMOR |
| G              | rs2063010   | TUMOR |
| A              | novel       | TUMOR |
| G              | rs1073123   | TUMOR |
| A              | rs10901220  | TUMOR |
| A              | novel       | TUMOR |
| G              | rs12030928  | TUMOR |
| T              | rs1802288   | TUMOR |
| G              | rs4826996   | TUMOR |
| A              | rs1052773   | TUMOR |
| C              | rs12664472  | TUMOR |
| C              | rs3800294   | TUMOR |
| T              | novel       | TUMOR |
| A              | rs35168566  | TUMOR |
| T              | rs182730993 | TUMOR |
| T              | rs2001324   | TUMOR |
| C              | rs7898115   | TUMOR |
| C              | rs12254171  | TUMOR |
| G              | rs7075277   | TUMOR |
| C              | rs3750580   | TUMOR |
| T              | rs1132079   | TUMOR |
| G              | rs17634167  | TUMOR |
| G              | rs12796222  | TUMOR |
| G              | rs1046860   | TUMOR |
| T              | rs56058201  | TUMOR |
| G              | rs705956    | TUMOR |
| C              | rs827958    | TUMOR |
| G              | novel       | TUMOR |
| T              | rs753582974 | TUMOR |
| G              | rs2839509   | TUMOR |
| A              | rs12575062  | TUMOR |
| C              | rs2301914   | TUMOR |
| A              | rs781247113 | TUMOR |
| C              | rs16923472  | TUMOR |
| A              | rs2734828   | TUMOR |
| T              | rs2247238   | TUMOR |
| A              | rs7852539   | TUMOR |
| G              | rs1716698   | TUMOR |
| T              | rs220147    | TUMOR |
| A              | rs220159    | TUMOR |
| T              | rs220150    | TUMOR |
| A              | novel       | TUMOR |
| G              | rs373842487 | TUMOR |
| A              | rs72836153  | TUMOR |
| A              | rs62231899  | TUMOR |
| T              | novel       | TUMOR |
| T              | rs41277210  | TUMOR |
| C              | rs4430871   | TUMOR |

VEP annotated somatic variants

|            |                       |       |
|------------|-----------------------|-------|
| AGCTCAGTTC | novel                 | TUMOR |
| T          | novel                 | TUMOR |
| G          | rs9605536             | TUMOR |
| G          | rs41279154            | TUMOR |
| T          | rs3214918             | TUMOR |
| T          | novel                 | TUMOR |
| T          | rs1220622,rs112401077 | TUMOR |
| C          | rs17031260            | TUMOR |
| A          | rs55721648            | TUMOR |
| T          | novel                 | TUMOR |
| A          | novel                 | TUMOR |
| T          | novel                 | TUMOR |
| G          | rs79238281            | TUMOR |
| T          | rs15493               | TUMOR |
| -          | novel                 | TUMOR |
| G          | rs11769825            | TUMOR |
| A          | rs13246460            | TUMOR |
| C          | rs10857625            | TUMOR |
| T          | rs7079527             | TUMOR |
| A          | rs10886789            | TUMOR |
| T          | rs2289336             | TUMOR |
| A          | rs1652727             | TUMOR |
| T          | rs1866516             | TUMOR |
| G          | rs4538426             | TUMOR |
| A          | rs41307688            | TUMOR |
| T          | rs181113399           | TUMOR |
| A          | rs147562907           | TUMOR |
| C          | rs2527189             | TUMOR |
| -          | rs763153590           | TUMOR |
| C          | rs2278128             | TUMOR |
| A          | rs4720537             | TUMOR |
| A          | rs11554421            | TUMOR |
| G          | rs910697              | TUMOR |
| C          | rs3793771             | TUMOR |
| G          | rs3734500             | TUMOR |
| T          | rs11068780            | TUMOR |
| C          | rs3733979             | TUMOR |
| T          | rs2270844             | TUMOR |
| T          | rs4134861             | TUMOR |
| A          | rs114552728           | TUMOR |
| C          | rs2273739             | TUMOR |
| A          | rs148023469           | TUMOR |
| C          | rs1106841             | TUMOR |
| C          | rs915927              | TUMOR |
| T          | rs25486               | TUMOR |
| T          | novel                 | TUMOR |
| G          | rs3738590             | TUMOR |
| C          | rs2666826             | TUMOR |
| T          | rs11155787            | TUMOR |
| G          | rs9484827             | TUMOR |
| G          | rs1001242             | TUMOR |
| G          | rs415434              | TUMOR |
| A          | rs556775              | TUMOR |
| T          | rs11774714            | TUMOR |
| T          | rs574606000           | TUMOR |

VEP annotated somatic variants

|      |                        |       |
|------|------------------------|-------|
| G    | rs139527148            | TUMOR |
| T    | rs537807113            | TUMOR |
| A    | rs2306159              | TUMOR |
| T    | rs931713               | TUMOR |
| C    | rs7781581              | TUMOR |
| G    | rs4982766              | TUMOR |
| T    | rs4734883              | TUMOR |
| C    | rs7915                 | TUMOR |
| T    | novel                  | TUMOR |
| G    | rs1989839              | TUMOR |
| A    | rs2301639              | TUMOR |
| A    | rs2071258              | TUMOR |
| T    | rs7066295              | TUMOR |
| C    | rs862708               | TUMOR |
| T    | rs28444973             | TUMOR |
| A    | rs10822043             | TUMOR |
| G    | rs2910443              | TUMOR |
| T    | novel                  | TUMOR |
| G    | rs11666149             | TUMOR |
| G    | rs384148               | TUMOR |
| T    | rs4829778              | TUMOR |
| C    | rs1055753              | TUMOR |
| C    | rs7273242              | TUMOR |
| A    | rs8182086              | TUMOR |
| T    | rs11556528             | TUMOR |
| A    | rs9636139              | TUMOR |
| AAGT | rs3217340              | TUMOR |
| T    | rs8104929              | TUMOR |
| A    | rs12067843             | TUMOR |
| C    | rs1781873              | TUMOR |
| T    | rs11710621,rs118003039 | TUMOR |
| T    | rs1129093              | TUMOR |
| C    | rs35215913             | TUMOR |
| T    | rs8110062              | TUMOR |
| T    | rs12590618             | TUMOR |
| T    | rs489172               | TUMOR |
| A    | novel                  | TUMOR |
| C    | rs10403445             | TUMOR |
| T    | rs781839               | TUMOR |



VEP annotated somatic variants

hed\_Norm\_Sample\_Bar/latch\_Norm\_Seq\_Allele/latch\_Norm\_Seq\_Allele`umor\_Validation\_Allele

|        |                  |                  |
|--------|------------------|------------------|
| NORMAL | -                | -                |
| NORMAL | T                | T                |
| NORMAL | G                | G                |
| NORMAL | A                | A                |
| NORMAL | C                | C                |
| NORMAL | T                | T                |
| NORMAL | A                | A                |
| NORMAL | A                | A                |
| NORMAL | T                | T                |
| NORMAL | C                | C                |
| NORMAL | C                | C                |
| NORMAL | -                | -                |
| NORMAL | G                | G                |
| NORMAL | T                | T                |
| NORMAL | C                | C                |
| NORMAL | C                | C                |
| NORMAL | C                | C                |
| NORMAL | C                | C                |
| NORMAL | T                | T                |
| NORMAL | G                | G                |
| NORMAL | G                | G                |
| NORMAL | G                | G                |
| NORMAL | G                | G                |
| NORMAL | C                | C                |
| NORMAL | C                | C                |
| NORMAL | G                | G                |
| NORMAL | C                | C                |
| NORMAL | -                | -                |
| NORMAL | C                | C                |
| NORMAL | A                | A                |
| NORMAL | A                | A                |
| NORMAL | C                | C                |
| NORMAL | A                | A                |
| NORMAL | A                | A                |
| NORMAL | TCTGTCCCTCCCCCTA | TCTGTCCCTCCCCCTA |
| NORMAL | C                | C                |
| NORMAL | T                | T                |
| NORMAL | T                | T                |
| NORMAL | G                | G                |
| NORMAL | -                | -                |
| NORMAL | T                | T                |
| NORMAL | C                | C                |
| NORMAL | T                | T                |
| NORMAL | G                | G                |
| NORMAL | T                | T                |
| NORMAL | C                | C                |
| NORMAL | C                | C                |
| NORMAL | C                | C                |
| NORMAL | C                | C                |
| NORMAL | T                | T                |
| NORMAL | C                | C                |
| NORMAL | C                | C                |
| NORMAL | C                | C                |
| NORMAL | C                | C                |

VEP annotated somatic variants

|        |       |       |
|--------|-------|-------|
| NORMAL | G     | G     |
| NORMAL | T     | T     |
| NORMAL | C     | C     |
| NORMAL | A     | A     |
| NORMAL | C     | C     |
| NORMAL | T     | T     |
| NORMAL | A     | A     |
| NORMAL | C     | C     |
| NORMAL | T     | T     |
| NORMAL | TTTTT | TTTTT |
| NORMAL | G     | G     |
| NORMAL | G     | G     |
| NORMAL | T     | T     |
| NORMAL | T     | T     |
| NORMAL | A     | A     |
| NORMAL | G     | G     |
| NORMAL | C     | C     |
| NORMAL | C     | C     |
| NORMAL | T     | T     |
| NORMAL | C     | C     |
| NORMAL | T     | T     |
| NORMAL | G     | G     |
| NORMAL | C     | C     |
| NORMAL | G     | G     |
| NORMAL | C     | C     |
| NORMAL | G     | G     |
| NORMAL | T     | T     |
| NORMAL | A     | A     |
| NORMAL | A     | A     |
| NORMAL | G     | G     |
| NORMAL | GG    | GG    |
| NORMAL | A     | A     |
| NORMAL | A     | A     |
| NORMAL | T     | T     |
| NORMAL | C     | C     |
| NORMAL | C     | C     |
| NORMAL | G     | G     |
| NORMAL | C     | C     |
| NORMAL | A     | A     |
| NORMAL | T     | T     |
| NORMAL | A     | A     |
| NORMAL | G     | G     |
| NORMAL | C     | C     |
| NORMAL | C     | C     |
| NORMAL | A     | A     |
| NORMAL | G     | G     |
| NORMAL | C     | C     |
| NORMAL | A     | A     |
| NORMAL | C     | C     |
| NORMAL | G     | G     |
| NORMAL | C     | C     |
| NORMAL | T     | T     |
| NORMAL | C     | C     |
| NORMAL | A     | A     |
| NORMAL | T     | T     |

VEP annotated somatic variants

|        |   |   |
|--------|---|---|
| NORMAL | G | G |
| NORMAL | G | G |
| NORMAL | C | C |
| NORMAL | G | G |
| NORMAL | A | A |
| NORMAL | G | G |
| NORMAL | G | G |
| NORMAL | A | A |
| NORMAL | A | A |
| NORMAL | G | G |
| NORMAL | G | G |
| NORMAL | G | G |
| NORMAL | C | C |
| NORMAL | C | C |
| NORMAL | C | C |
| NORMAL | G | G |
| NORMAL | C | C |
| NORMAL | T | T |
| NORMAL | G | G |
| NORMAL | G | G |
| NORMAL | A | A |
| NORMAL | C | C |
| NORMAL | C | C |
| NORMAL | A | A |
| NORMAL | A | A |
| NORMAL | - | - |
| NORMAL | G | G |
| NORMAL | C | C |
| NORMAL | G | G |
| NORMAL | G | G |
| NORMAL | T | T |
| NORMAL | T | T |
| NORMAL | C | C |
| NORMAL | G | G |
| NORMAL | T | T |
| NORMAL | G | G |
| NORMAL | A | A |
| NORMAL | A | A |
| NORMAL | G | G |
| NORMAL | G | G |
| NORMAL | C | C |
| NORMAL | C | C |
| NORMAL | G | G |
| NORMAL | C | C |
| NORMAL | C | C |
| NORMAL | G | G |
| NORMAL | A | A |
| NORMAL | T | T |
| NORMAL | C | C |
| NORMAL | G | G |
| NORMAL | G | G |
| NORMAL | T | T |
| NORMAL | C | C |
| NORMAL | G | G |
| NORMAL | A | A |

VEP annotated somatic variants

|        |            |            |
|--------|------------|------------|
| NORMAL | -          | -          |
| NORMAL | T          | T          |
| NORMAL | G          | G          |
| NORMAL | G          | G          |
| NORMAL | T          | T          |
| NORMAL | C          | C          |
| NORMAL | TA         | TA         |
| NORMAL | GAGA       | GAGA       |
| NORMAL | G          | G          |
| NORMAL | T          | T          |
| NORMAL | T          | T          |
| NORMAL | T          | T          |
| NORMAL | A          | A          |
| NORMAL | A          | A          |
| NORMAL | TAAT       | TAAT       |
| NORMAL | T          | T          |
| NORMAL | G          | G          |
| NORMAL | T          | T          |
| NORMAL | G          | G          |
| NORMAL | T          | T          |
| NORMAL | G          | G          |
| NORMAL | C          | C          |
| NORMAL | A          | A          |
| NORMAL | G          | G          |
| NORMAL | T          | T          |
| NORMAL | C          | C          |
| NORMAL | A          | A          |
| NORMAL | G          | G          |
| NORMAL | C          | C          |
| NORMAL | ACACAC     | ACACAC     |
| NORMAL | A          | A          |
| NORMAL | C          | C          |
| NORMAL | C          | C          |
| NORMAL | C          | C          |
| NORMAL | T          | T          |
| NORMAL | G          | G          |
| NORMAL | C          | C          |
| NORMAL | G          | G          |
| NORMAL | G          | G          |
| NORMAL | G          | G          |
| NORMAL | C          | C          |
| NORMAL | C          | C          |
| NORMAL | C          | C          |
| NORMAL | C          | C          |
| NORMAL | C          | C          |
| NORMAL | T          | T          |
| NORMAL | G          | G          |
| NORMAL | C          | C          |
| NORMAL | G          | G          |
| NORMAL | G          | G          |
| NORMAL | C          | C          |
| NORMAL | C          | C          |
| NORMAL | C          | C          |
| NORMAL | ATATGAATAC | ATATGAATAC |
| NORMAL | G          | G          |

VEP annotated somatic variants

|        |                  |                        |
|--------|------------------|------------------------|
| NORMAL | T                | T                      |
| NORMAL | G                | G                      |
| NORMAL | A                | A                      |
| NORMAL | T                | T                      |
| NORMAL | A                | A                      |
| NORMAL | T                | T                      |
| NORMAL | C                | C                      |
| NORMAL | G                | G                      |
| NORMAL | G                | G                      |
| NORMAL | G                | G                      |
| NORMAL | G                | G                      |
| NORMAL | C                | C                      |
| NORMAL | G                | G                      |
| NORMAL | A                | A                      |
| NORMAL | T                | T                      |
| NORMAL | A                | A                      |
| NORMAL | T                | T                      |
| NORMAL | A                | A                      |
| NORMAL | A                | A                      |
| NORMAL | ,GGGCAGAGGCTGCTG | ,GGGCAGAGGCTGCTGGCGGGT |
| NORMAL | C                | C                      |
| NORMAL | T                | T                      |
| NORMAL | G                | G                      |
| NORMAL | T                | T                      |
| NORMAL | C                | C                      |
| NORMAL | G                | G                      |
| NORMAL | C                | C                      |
| NORMAL | A                | A                      |
| NORMAL | A                | A                      |
| NORMAL | C                | C                      |
| NORMAL | C                | C                      |
| NORMAL | G                | G                      |
| NORMAL | A                | A                      |
| NORMAL | G                | G                      |
| NORMAL | -                | -                      |
| NORMAL | C                | C                      |
| NORMAL | A                | A                      |
| NORMAL | G                | G                      |
| NORMAL | T                | T                      |
| NORMAL | T                | T                      |
| NORMAL | A                | A                      |
| NORMAL | G                | G                      |
| NORMAL | C                | C                      |
| NORMAL | T                | T                      |
| NORMAL | T                | T                      |
| NORMAL | C                | C                      |
| NORMAL | C                | C                      |
| NORMAL | A                | A                      |
| NORMAL | A                | A                      |
| NORMAL | T                | T                      |
| NORMAL | C                | C                      |
| NORMAL | G                | G                      |
| NORMAL | T                | T                      |
| NORMAL | G                | G                      |
| NORMAL | G                | G                      |

VEP annotated somatic variants

|        |     |     |
|--------|-----|-----|
| NORMAL | T   | T   |
| NORMAL | C   | C   |
| NORMAL | T   | T   |
| NORMAL | G   | G   |
| NORMAL | C   | C   |
| NORMAL | G   | G   |
| NORMAL | G   | G   |
| NORMAL | G   | G   |
| NORMAL | T   | T   |
| NORMAL | C   | C   |
| NORMAL | G   | G   |
| NORMAL | C   | C   |
| NORMAL | T   | T   |
| NORMAL | T   | T   |
| NORMAL | G   | G   |
| NORMAL | C   | C   |
| NORMAL | G   | G   |
| NORMAL | G   | G   |
| NORMAL | G   | G   |
| NORMAL | G   | G   |
| NORMAL | A   | A   |
| NORMAL | C   | C   |
| NORMAL | C   | C   |
| NORMAL | A   | A   |
| NORMAL | A   | A   |
| NORMAL | T   | T   |
| NORMAL | C   | C   |
| NORMAL | A   | A   |
| NORMAL | A   | A   |
| NORMAL | -   | -   |
| NORMAL | C   | C   |
| NORMAL | T   | T   |
| NORMAL | T   | T   |
| NORMAL | G   | G   |
| NORMAL | T   | T   |
| NORMAL | G   | G   |
| NORMAL | T   | T   |
| NORMAL | TTG | TTG |
| NORMAL | C   | C   |
| NORMAL | A   | A   |
| NORMAL | G   | G   |
| NORMAL | C   | C   |
| NORMAL | C   | C   |
| NORMAL | A   | A   |
| NORMAL | G   | G   |
| NORMAL | A   | A   |
| NORMAL | G   | G   |
| NORMAL | C   | C   |
| NORMAL | G   | G   |
| NORMAL | -   | -   |
| NORMAL | A   | A   |
| NORMAL | A   | A   |
| NORMAL | C   | C   |
| NORMAL | C   | C   |
| NORMAL | A   | A   |

VEP annotated somatic variants

|        |      |      |
|--------|------|------|
| NORMAL | A    | A    |
| NORMAL | G    | G    |
| NORMAL | C    | C    |
| NORMAL | T    | T    |
| NORMAL | C    | C    |
| NORMAL | G    | G    |
| NORMAL | A    | A    |
| NORMAL | A    | A    |
| NORMAL | C    | C    |
| NORMAL | G    | G    |
| NORMAL | A    | A    |
| NORMAL | C    | C    |
| NORMAL | G    | G    |
| NORMAL | C    | C    |
| NORMAL | C    | C    |
| NORMAL | G    | G    |
| NORMAL | T    | T    |
| NORMAL | C    | C    |
| NORMAL | AA   | AA   |
| NORMAL | C    | C    |
| NORMAL | C    | C    |
| NORMAL | G    | G    |
| NORMAL | T    | T    |
| NORMAL | A    | A    |
| NORMAL | A    | A    |
| NORMAL | T    | T    |
| NORMAL | G    | G    |
| NORMAL | A    | A    |
| NORMAL | G    | G    |
| NORMAL | C    | C    |
| NORMAL | A    | A    |
| NORMAL | T    | T    |
| NORMAL | T    | T    |
| NORMAL | G    | G    |
| NORMAL | A    | A    |
| NORMAL | C    | C    |
| NORMAL | G    | G    |
| NORMAL | G    | G    |
| NORMAL | G    | G    |
| NORMAL | C    | C    |
| NORMAL | -    | -    |
| NORMAL | C    | C    |
| NORMAL | T    | T    |
| NORMAL | A    | A    |
| NORMAL | G    | G    |
| NORMAL | T    | T    |
| NORMAL | G    | G    |
| NORMAL | TCAC | TCAC |
| NORMAL | A    | A    |
| NORMAL | C    | C    |
| NORMAL | G    | G    |
| NORMAL | A    | A    |
| NORMAL | A    | A    |
| NORMAL | G    | G    |
| NORMAL | C    | C    |

VEP annotated somatic variants

|        |      |      |
|--------|------|------|
| NORMAL | C    | C    |
| NORMAL | A    | A    |
| NORMAL | T    | T    |
| NORMAL | A    | A    |
| NORMAL | C    | C    |
| NORMAL | T    | T    |
| NORMAL | A    | A    |
| NORMAL | T    | T    |
| NORMAL | A    | A    |
| NORMAL | G    | G    |
| NORMAL | T    | T    |
| NORMAL | T    | T    |
| NORMAL | T    | T    |
| NORMAL | G    | G    |
| NORMAL | G    | G    |
| NORMAL | C    | C    |
| NORMAL | C    | C    |
| NORMAL | G    | G    |
| NORMAL | G    | G    |
| NORMAL | A    | A    |
| NORMAL | C    | C    |
| NORMAL | C    | C    |
| NORMAL | C    | C    |
| NORMAL | C    | C    |
| NORMAL | G    | G    |
| NORMAL | G    | G    |
| NORMAL | G    | G    |
| NORMAL | TATT | TATT |
| NORMAL | C    | C    |
| NORMAL | C    | C    |
| NORMAL | C    | C    |
| NORMAL | T    | T    |
| NORMAL | G    | G    |
| NORMAL | A    | A    |
| NORMAL | T    | T    |
| NORMAL | G    | G    |
| NORMAL | G    | G    |
| NORMAL | A    | A    |
| NORMAL | G    | G    |
| NORMAL | T    | T    |
| NORMAL | A    | A    |
| NORMAL | G    | G    |
| NORMAL | G    | G    |
| NORMAL | C    | C    |
| NORMAL | C    | C    |
| NORMAL | C    | C    |
| NORMAL | C    | C    |
| NORMAL | C    | C    |
| NORMAL | G    | G    |
| NORMAL | A    | A    |
| NORMAL | G    | G    |
| NORMAL | T    | T    |
| NORMAL | -    | -    |
| NORMAL | A    | A    |
| NORMAL | TCTC | TCTC |
| NORMAL | C    | C    |



VEP annotated somatic variants

|        |   |   |
|--------|---|---|
| NORMAL | C | C |
| NORMAL | G | G |
| NORMAL | A | A |
| NORMAL | C | C |
| NORMAL | C | C |
| NORMAL | G | G |
| NORMAL | G | G |
| NORMAL | A | A |
| NORMAL | C | C |
| NORMAL | G | G |
| NORMAL | C | C |
| NORMAL | A | A |
| NORMAL | A | A |
| NORMAL | T | T |
| NORMAL | G | G |
| NORMAL | A | A |
| NORMAL | C | C |
| NORMAL | A | A |
| NORMAL | C | C |
| NORMAL | T | T |
| NORMAL | C | C |
| NORMAL | C | C |
| NORMAL | G | G |
| NORMAL | A | A |
| NORMAL | C | C |
| NORMAL | C | C |
| NORMAL | A | A |
| NORMAL | G | G |
| NORMAL | G | G |
| NORMAL | G | G |
| NORMAL | C | C |
| NORMAL | C | C |
| NORMAL | C | C |
| NORMAL | C | C |
| NORMAL | A | A |
| NORMAL | C | C |
| NORMAL | T | T |
| NORMAL | G | G |
| NORMAL | G | G |
| NORMAL | T | T |
| NORMAL | G | G |
| NORMAL | C | C |
| NORMAL | G | G |
| NORMAL | T | T |
| NORMAL | C | C |
| NORMAL | C | C |
| NORMAL | T | T |
| NORMAL | G | G |
| NORMAL | - | - |
| NORMAL | - | - |
| NORMAL | G | G |
| NORMAL | G | G |
| NORMAL | T | T |
| NORMAL | G | G |
| NORMAL | G | G |

VEP annotated somatic variants

|        |        |        |
|--------|--------|--------|
| NORMAL | C      | C      |
| NORMAL | T      | T      |
| NORMAL | C      | C      |
| NORMAL | A      | A      |
| NORMAL | C      | C      |
| NORMAL | C      | C      |
| NORMAL | G      | G      |
| NORMAL | A      | A      |
| NORMAL | C      | C      |
| NORMAL | G      | G      |
| NORMAL | A      | A      |
| NORMAL | A      | A      |
| NORMAL | A      | A      |
| NORMAL | T      | T      |
| NORMAL | T      | T      |
| NORMAL | C      | C      |
| NORMAL | G      | G      |
| NORMAL | G      | G      |
| NORMAL | G      | G      |
| NORMAL | C      | C      |
| NORMAL | C      | C      |
| NORMAL | G      | G      |
| NORMAL | G      | G      |
| NORMAL | G      | G      |
| NORMAL | G      | G      |
| NORMAL | A      | A      |
| NORMAL | G      | G      |
| NORMAL | G      | G      |
| NORMAL | G      | G      |
| NORMAL | C      | C      |
| NORMAL | G      | G      |
| NORMAL | G      | G      |
| NORMAL | G      | G      |
| NORMAL | T      | T      |
| NORMAL | C      | C      |
| NORMAL | C      | C      |
| NORMAL | G      | G      |
| NORMAL | -      | -      |
| NORMAL | G      | G      |
| NORMAL | G      | G      |
| NORMAL | G      | G      |
| NORMAL | A      | A      |
| NORMAL | -      | -      |
| NORMAL | T      | T      |
| NORMAL | G      | G      |
| NORMAL | C      | C      |
| NORMAL | GGTGGT | GGTGGT |
| NORMAL | C      | C      |
| NORMAL | C      | C      |
| NORMAL | C      | C      |
| NORMAL | T      | T      |
| NORMAL | G      | G      |
| NORMAL | T      | T      |
| NORMAL | T      | T      |
| NORMAL | C      | C      |

VEP annotated somatic variants

|        |   |   |
|--------|---|---|
| NORMAL | C | C |
| NORMAL | G | G |
| NORMAL | A | A |
| NORMAL | G | G |
| NORMAL | C | C |
| NORMAL | T | T |
| NORMAL | G | G |
| NORMAL | C | C |
| NORMAL | T | T |
| NORMAL | A | A |
| NORMAL | T | T |
| NORMAL | T | T |
| NORMAL | C | C |
| NORMAL | C | C |
| NORMAL | G | G |
| NORMAL | G | G |
| NORMAL | A | A |
| NORMAL | C | C |
| NORMAL | A | A |
| NORMAL | G | G |
| NORMAL | T | T |
| NORMAL | G | G |
| NORMAL | T | T |
| NORMAL | G | G |
| NORMAL | - | - |
| NORMAL | G | G |
| NORMAL | G | G |
| NORMAL | A | A |
| NORMAL | G | G |
| NORMAL | C | C |
| NORMAL | A | A |
| NORMAL | A | A |
| NORMAL | C | C |
| NORMAL | T | T |
| NORMAL | A | A |
| NORMAL | A | A |
| NORMAL | C | C |
| NORMAL | C | C |
| NORMAL | G | G |
| NORMAL | G | G |
| NORMAL | G | G |
| NORMAL | G | G |
| NORMAL | G | G |
| NORMAL | T | T |
| NORMAL | G | G |
| NORMAL | G | G |
| NORMAL | T | T |
| NORMAL | T | T |
| NORMAL | G | G |
| NORMAL | T | T |
| NORMAL | A | A |
| NORMAL | C | C |
| NORMAL | C | C |
| NORMAL | G | G |
| NORMAL | G | G |

VEP annotated somatic variants

|        |    |    |
|--------|----|----|
| NORMAL | T  | T  |
| NORMAL | G  | G  |
| NORMAL | A  | A  |
| NORMAL | CG | CG |
| NORMAL | G  | G  |
| NORMAL | C  | C  |
| NORMAL | G  | G  |
| NORMAL | C  | C  |
| NORMAL | G  | G  |
| NORMAL | G  | G  |
| NORMAL | C  | C  |
| NORMAL | T  | T  |
| NORMAL | T  | T  |
| NORMAL | C  | C  |
| NORMAL | G  | G  |
| NORMAL | G  | G  |
| NORMAL | T  | T  |
| NORMAL | G  | G  |
| NORMAL | G  | G  |
| NORMAL | T  | T  |
| NORMAL | C  | C  |
| NORMAL | G  | G  |
| NORMAL | C  | C  |
| NORMAL | C  | C  |
| NORMAL | C  | C  |
| NORMAL | C  | C  |
| NORMAL | C  | C  |
| NORMAL | C  | C  |
| NORMAL | G  | G  |
| NORMAL | G  | G  |
| NORMAL | C  | C  |
| NORMAL | T  | T  |
| NORMAL | G  | G  |
| NORMAL | A  | A  |
| NORMAL | T  | T  |
| NORMAL | C  | C  |
| NORMAL | G  | G  |
| NORMAL | C  | C  |
| NORMAL | G  | G  |
| NORMAL | G  | G  |
| NORMAL | C  | C  |
| NORMAL | T  | T  |
| NORMAL | T  | T  |
| NORMAL | T  | T  |
| NORMAL | A  | A  |
| NORMAL | T  | T  |
| NORMAL | C  | C  |
| NORMAL | C  | C  |
| NORMAL | C  | C  |
| NORMAL | C  | C  |
| NORMAL | G  | G  |
| NORMAL | G  | G  |
| NORMAL | C  | C  |
| NORMAL | C  | C  |
| NORMAL | C  | C  |
| NORMAL | C  | C  |

VEP annotated somatic variants

|        |      |      |
|--------|------|------|
| NORMAL | G    | G    |
| NORMAL | C    | C    |
| NORMAL | C    | C    |
| NORMAL | C    | C    |
| NORMAL | TTT  | TTT  |
| NORMAL | G    | G    |
| NORMAL | G    | G    |
| NORMAL | G    | G    |
| NORMAL | T    | T    |
| NORMAL | G    | G    |
| NORMAL | C    | C    |
| NORMAL | -    | -    |
| NORMAL | G    | G    |
| NORMAL | G    | G    |
| NORMAL | T    | T    |
| NORMAL | T    | T    |
| NORMAL | C    | C    |
| NORMAL | C    | C    |
| NORMAL | A    | A    |
| NORMAL | A    | A    |
| NORMAL | G    | G    |
| NORMAL | A    | A    |
| NORMAL | G    | G    |
| NORMAL | T    | T    |
| NORMAL | A    | A    |
| NORMAL | T    | T    |
| NORMAL | T    | T    |
| NORMAL | G    | G    |
| NORMAL | C    | C    |
| NORMAL | T    | T    |
| NORMAL | A    | A    |
| NORMAL | G    | G    |
| NORMAL | G    | G    |
| NORMAL | C    | C    |
| NORMAL | A    | A    |
| NORMAL | T    | T    |
| NORMAL | GCCT | GCCT |
| NORMAL | C    | C    |
| NORMAL | GG   | GG   |
| NORMAL | G    | G    |
| NORMAL | C    | C    |
| NORMAL | C    | C    |
| NORMAL | A    | A    |
| NORMAL | G    | G    |
| NORMAL | A    | A    |
| NORMAL | C    | C    |
| NORMAL | T    | T    |
| NORMAL | G    | G    |
| NORMAL | T    | T    |
| NORMAL | G    | G    |
| NORMAL | A    | A    |
| NORMAL | C    | C    |
| NORMAL | C    | C    |
| NORMAL | C    | C    |
| NORMAL | G    | G    |

VEP annotated somatic variants

|        |          |          |
|--------|----------|----------|
| NORMAL | A        | A        |
| NORMAL | T        | T        |
| NORMAL | T        | T        |
| NORMAL | G        | G        |
| NORMAL | T        | T        |
| NORMAL | C        | C        |
| NORMAL | T        | T        |
| NORMAL | A        | A        |
| NORMAL | T        | T        |
| NORMAL | C        | C        |
| NORMAL | -        | -        |
| NORMAL | C        | C        |
| NORMAL | G        | G        |
| NORMAL | G        | G        |
| NORMAL | G        | G        |
| NORMAL | C        | C        |
| NORMAL | G        | G        |
| NORMAL | A        | A        |
| NORMAL | G        | G        |
| NORMAL | C        | C        |
| NORMAL | C        | C        |
| NORMAL | TT       | TT       |
| NORMAL | C        | C        |
| NORMAL | A        | A        |
| NORMAL | G        | G        |
| NORMAL | G        | G        |
| NORMAL | C        | C        |
| NORMAL | G        | G        |
| NORMAL | C        | C        |
| NORMAL | G        | G        |
| NORMAL | C        | C        |
| NORMAL | G        | G        |
| NORMAL | G        | G        |
| NORMAL | G        | G        |
| NORMAL | G        | G        |
| NORMAL | C        | C        |
| NORMAL | G        | G        |
| NORMAL | C        | C        |
| NORMAL | C        | C        |
| NORMAL | T        | T        |
| NORMAL | G        | G        |
| NORMAL | G        | G        |
| NORMAL | C        | C        |
| NORMAL | T        | T        |
| NORMAL | ACACACAC | ACACACAC |
| NORMAL | G        | G        |
| NORMAL | T        | T        |
| NORMAL | C        | C        |
| NORMAL | G        | G        |
| NORMAL | C        | C        |
| NORMAL | -        | -        |
| NORMAL | C        | C        |
| NORMAL | CT       | CT       |
| NORMAL | A        | A        |
| NORMAL | T        | T        |

VEP annotated somatic variants

|        |   |   |
|--------|---|---|
| NORMAL | T | T |
| NORMAL | A | A |
| NORMAL | T | T |
| NORMAL | T | T |
| NORMAL | T | T |
| NORMAL | C | C |
| NORMAL | A | A |
| NORMAL | C | C |
| NORMAL | G | G |
| NORMAL | C | C |
| NORMAL | G | G |
| NORMAL | G | G |
| NORMAL | T | T |
| NORMAL | T | T |
| NORMAL | T | T |
| NORMAL | A | A |
| NORMAL | C | C |
| NORMAL | C | C |
| NORMAL | A | A |
| NORMAL | G | G |
| NORMAL | G | G |
| NORMAL | G | G |
| NORMAL | T | T |
| NORMAL | G | G |
| NORMAL | C | C |
| NORMAL | A | A |
| NORMAL | G | G |
| NORMAL | - | - |
| NORMAL | G | G |
| NORMAL | G | G |
| NORMAL | C | C |
| NORMAL | C | C |
| NORMAL | G | G |
| NORMAL | C | C |
| NORMAL | C | C |
| NORMAL | G | G |
| NORMAL | T | T |
| NORMAL | T | T |
| NORMAL | T | T |
| NORMAL | A | A |
| NORMAL | T | T |
| NORMAL | A | A |
| NORMAL | T | T |
| NORMAL | C | C |
| NORMAL | C | C |
| NORMAL | G | G |
| NORMAL | G | G |
| NORMAL | G | G |
| NORMAL | T | T |
| NORMAL | A | A |
| NORMAL | C | C |
| NORMAL | A | A |
| NORMAL | T | T |
| NORMAL | A | A |
| NORMAL | G | G |
| NORMAL | A | A |

VEP annotated somatic variants

|        |     |     |
|--------|-----|-----|
| NORMAL | C   | C   |
| NORMAL | G   | G   |
| NORMAL | T   | T   |
| NORMAL | G   | G   |
| NORMAL | C   | C   |
| NORMAL | T   | T   |
| NORMAL | C   | C   |
| NORMAL | G   | G   |
| NORMAL | T   | T   |
| NORMAL | G   | G   |
| NORMAL | T   | T   |
| NORMAL | C   | C   |
| NORMAL | T   | T   |
| NORMAL | C   | C   |
| NORMAL | C   | C   |
| NORMAL | G   | G   |
| NORMAL | C   | C   |
| NORMAL | C   | C   |
| NORMAL | T   | T   |
| NORMAL | A   | A   |
| NORMAL | C   | C   |
| NORMAL | C   | C   |
| NORMAL | C   | C   |
| NORMAL | A   | A   |
| NORMAL | A   | A   |
| NORMAL | GGG | GGG |
| NORMAL | T   | T   |
| NORMAL | T   | T   |
| NORMAL | C   | C   |
| NORMAL | G   | G   |
| NORMAL | A   | A   |
| NORMAL | G   | G   |
| NORMAL | C   | C   |
| NORMAL | C   | C   |
| NORMAL | C   | C   |
| NORMAL | G   | G   |
| NORMAL | C   | C   |
| NORMAL | T   | T   |
| NORMAL | T   | T   |
| NORMAL | G   | G   |
| NORMAL | C   | C   |
| NORMAL | G   | G   |
| NORMAL | A   | A   |
| NORMAL | -   | -   |
| NORMAL | C   | C   |
| NORMAL | C   | C   |
| NORMAL | G   | G   |
| NORMAL | G   | G   |
| NORMAL | G   | G   |
| NORMAL | C   | C   |
| NORMAL | C   | C   |
| NORMAL | T   | T   |
| NORMAL | G   | G   |
| NORMAL | A   | A   |
| NORMAL | C   | C   |



VEP annotated somatic variants

|        |       |       |
|--------|-------|-------|
| NORMAL | A     | A     |
| NORMAL | T     | T     |
| NORMAL | C     | C     |
| NORMAL | A     | A     |
| NORMAL | C     | C     |
| NORMAL | G     | G     |
| NORMAL | C     | C     |
| NORMAL | T     | T     |
| NORMAL | C     | C     |
| NORMAL | G     | G     |
| NORMAL | C     | C     |
| NORMAL | G     | G     |
| NORMAL | C     | C     |
| NORMAL | T     | T     |
| NORMAL | A     | A     |
| NORMAL | T     | T     |
| NORMAL | A     | A     |
| NORMAL | G     | G     |
| NORMAL | G     | G     |
| NORMAL | C     | C     |
| NORMAL | C     | C     |
| NORMAL | TT    | TT    |
| NORMAL | C     | C     |
| NORMAL | C     | C     |
| NORMAL | A     | A     |
| NORMAL | G     | G     |
| NORMAL | A     | A     |
| NORMAL | G     | G     |
| NORMAL | TGTTG | TGTTG |
| NORMAL | -     | -     |
| NORMAL | T     | T     |
| NORMAL | G     | G     |
| NORMAL | G     | G     |
| NORMAL | T     | T     |
| NORMAL | G     | G     |
| NORMAL | A     | A     |
| NORMAL | G     | G     |
| NORMAL | G     | G     |
| NORMAL | C     | C     |
| NORMAL | T     | T     |
| NORMAL | C     | C     |
| NORMAL | C     | C     |
| NORMAL | T     | T     |
| NORMAL | C     | C     |
| NORMAL | G     | G     |
| NORMAL | G     | G     |
| NORMAL | T     | T     |
| NORMAL | C     | C     |
| NORMAL | T     | T     |
| NORMAL | A     | A     |
| NORMAL | T     | T     |
| NORMAL | A     | A     |
| NORMAL | C     | C     |
| NORMAL | A     | A     |
| NORMAL | C     | C     |

VEP annotated somatic variants

|        |      |      |
|--------|------|------|
| NORMAL | T    | T    |
| NORMAL | C    | C    |
| NORMAL | C    | C    |
| NORMAL | C    | C    |
| NORMAL | A    | A    |
| NORMAL | A    | A    |
| NORMAL | A    | A    |
| NORMAL | C    | C    |
| NORMAL | T    | T    |
| NORMAL | G    | G    |
| NORMAL | C    | C    |
| NORMAL | C    | C    |
| NORMAL | G    | G    |
| NORMAL | T    | T    |
| NORMAL | G    | G    |
| NORMAL | G    | G    |
| NORMAL | C    | C    |
| NORMAL | T    | T    |
| NORMAL | A    | A    |
| NORMAL | T    | T    |
| NORMAL | C    | C    |
| NORMAL | T    | T    |
| NORMAL | C    | C    |
| NORMAL | A    | A    |
| NORMAL | G    | G    |
| NORMAL | C    | C    |
| NORMAL | A    | A    |
| NORMAL | A    | A    |
| NORMAL | A    | A    |
| NORMAL | G    | G    |
| NORMAL | T    | T    |
| NORMAL | C    | C    |
| NORMAL | A    | A    |
| NORMAL | T    | T    |
| NORMAL | C    | C    |
| NORMAL | G    | G    |
| NORMAL | C    | C    |
| NORMAL | C    | C    |
| NORMAL | TTTT | TTTT |
| NORMAL | T    | T    |
| NORMAL | G    | G    |
| NORMAL | G    | G    |
| NORMAL | G    | G    |
| NORMAL | A    | A    |
| NORMAL | G    | G    |
| NORMAL | G    | G    |
| NORMAL | C    | C    |
| NORMAL | C    | C    |
| NORMAL | T    | T    |
| NORMAL | T    | T    |
| NORMAL | A    | A    |
| NORMAL | C    | C    |
| NORMAL | A    | A    |
| NORMAL | T    | T    |
| NORMAL | C    | C    |

VEP annotated somatic variants

|        |        |        |
|--------|--------|--------|
| NORMAL | -      | -      |
| NORMAL | C      | C      |
| NORMAL | AGAG   | AGAG   |
| NORMAL | C      | C      |
| NORMAL | T      | T      |
| NORMAL | C      | C      |
| NORMAL | C      | C      |
| NORMAL | T      | T      |
| NORMAL | G      | G      |
| NORMAL | G      | G      |
| NORMAL | A      | A      |
| NORMAL | A      | A      |
| NORMAL | G      | G      |
| NORMAL | A      | A      |
| NORMAL | TTAAAG | TTAAAG |
| NORMAL | TCTAA  | TCTAA  |
| NORMAL | C      | C      |
| NORMAL | C      | C      |
| NORMAL | C      | C      |
| NORMAL | T      | T      |
| NORMAL | T      | T      |
| NORMAL | A      | A      |
| NORMAL | T      | T      |
| NORMAL | T      | T      |
| NORMAL | A      | A      |
| NORMAL | G      | G      |
| NORMAL | G      | G      |
| NORMAL | C      | C      |
| NORMAL | T      | T      |
| NORMAL | C      | C      |
| NORMAL | G      | G      |
| NORMAL | A      | A      |
| NORMAL | C      | C      |
| NORMAL | G      | G      |
| NORMAL | A      | A      |
| NORMAL | T      | T      |
| NORMAL | C      | C      |
| NORMAL | G      | G      |
| NORMAL | A      | A      |
| NORMAL | C      | C      |
| NORMAL | A      | A      |
| NORMAL | A      | A      |
| NORMAL | AA     | AA     |
| NORMAL | C      | C      |
| NORMAL | -      | -      |
| NORMAL | T      | T      |
| NORMAL | G      | G      |
| NORMAL | T      | T      |
| NORMAL | G      | G      |
| NORMAL | G      | G      |
| NORMAL | G      | G      |
| NORMAL | C      | C      |
| NORMAL | C      | C      |
| NORMAL | G      | G      |
| NORMAL | T      | T      |

VEP annotated somatic variants

|        |   |   |
|--------|---|---|
| NORMAL | C | C |
| NORMAL | C | C |
| NORMAL | C | C |
| NORMAL | A | A |
| NORMAL | A | A |
| NORMAL | A | A |
| NORMAL | C | C |
| NORMAL | C | C |
| NORMAL | G | G |
| NORMAL | G | G |
| NORMAL | C | C |
| NORMAL | A | A |
| NORMAL | G | G |
| NORMAL | G | G |
| NORMAL | C | C |
| NORMAL | T | T |
| NORMAL | T | T |
| NORMAL | A | A |
| NORMAL | A | A |
| NORMAL | A | A |
| NORMAL | T | T |
| NORMAL | C | C |
| NORMAL | T | T |
| NORMAL | G | G |
| NORMAL | T | T |
| NORMAL | G | G |
| NORMAL | A | A |
| NORMAL | A | A |
| NORMAL | C | C |
| NORMAL | C | C |
| NORMAL | G | G |
| NORMAL | C | C |
| NORMAL | A | A |
| NORMAL | C | C |
| NORMAL | - | - |
| NORMAL | T | T |
| NORMAL | C | C |
| NORMAL | C | C |
| NORMAL | A | A |
| NORMAL | T | T |
| NORMAL | A | A |
| NORMAL | A | A |
| NORMAL | A | A |
| NORMAL | C | C |
| NORMAL | C | C |
| NORMAL | A | A |
| NORMAL | G | G |
| NORMAL | G | G |
| NORMAL | A | A |
| NORMAL | T | T |
| NORMAL | C | C |
| NORMAL | C | C |
| NORMAL | T | T |
| NORMAL | T | T |
| NORMAL | C | C |

VEP annotated somatic variants

|        |       |       |
|--------|-------|-------|
| NORMAL | -     | -     |
| NORMAL | C     | C     |
| NORMAL | A     | A     |
| NORMAL | A     | A     |
| NORMAL | T     | T     |
| NORMAL | T     | T     |
| NORMAL | A     | A     |
| NORMAL | G     | G     |
| NORMAL | G     | G     |
| NORMAL | A     | A     |
| NORMAL | A     | A     |
| NORMAL | C     | C     |
| NORMAL | C     | C     |
| NORMAL | G     | G     |
| NORMAL | A     | A     |
| NORMAL | G     | G     |
| NORMAL | -     | -     |
| NORMAL | G     | G     |
| NORMAL | G     | G     |
| NORMAL | -     | -     |
| NORMAL | C     | C     |
| NORMAL | T     | T     |
| NORMAL | G     | G     |
| NORMAL | CC    | CC    |
| NORMAL | C     | C     |
| NORMAL | A     | A     |
| NORMAL | A     | A     |
| NORMAL | G     | G     |
| NORMAL | A     | A     |
| NORMAL | C     | C     |
| NORMAL | C     | C     |
| NORMAL | T     | T     |
| NORMAL | -     | -     |
| NORMAL | C     | C     |
| NORMAL | G     | G     |
| NORMAL | G     | G     |
| NORMAL | -     | -     |
| NORMAL | C     | C     |
| NORMAL | G     | G     |
| NORMAL | T     | T     |
| NORMAL | T     | T     |
| NORMAL | A     | A     |
| NORMAL | T     | T     |
| NORMAL | A     | A     |
| NORMAL | A     | A     |
| NORMAL | A     | A     |
| NORMAL | G     | G     |
| NORMAL | G     | G     |
| NORMAL | CTGGT | CTGGT |
| NORMAL | G     | G     |
| NORMAL | C     | C     |
| NORMAL | G     | G     |
| NORMAL | G     | G     |
| NORMAL | G     | G     |
| NORMAL | -     | -     |

VEP annotated somatic variants

|        |        |        |
|--------|--------|--------|
| NORMAL | AA     | AA     |
| NORMAL | G      | G      |
| NORMAL | G      | G      |
| NORMAL | A      | A      |
| NORMAL | A      | A      |
| NORMAL | G      | G      |
| NORMAL | A      | A      |
| NORMAL | G      | G      |
| NORMAL | A      | A      |
| NORMAL | C      | C      |
| NORMAL | T      | T      |
| NORMAL | T      | T      |
| NORMAL | G      | G      |
| NORMAL | C      | C      |
| NORMAL | A      | A      |
| NORMAL | T      | T      |
| NORMAL | T      | T      |
| NORMAL | -      | -      |
| NORMAL | T      | T      |
| NORMAL | T      | T      |
| NORMAL | C      | C      |
| NORMAL | A      | A      |
| NORMAL | G      | G      |
| NORMAL | A      | A      |
| NORMAL | G      | G      |
| NORMAL | G      | G      |
| NORMAL | -      | -      |
| NORMAL | T      | T      |
| NORMAL | T      | T      |
| NORMAL | G      | G      |
| NORMAL | G      | G      |
| NORMAL | C      | C      |
| NORMAL | G      | G      |
| NORMAL | G      | G      |
| NORMAL | C      | C      |
| NORMAL | A      | A      |
| NORMAL | G      | G      |
| NORMAL | C      | C      |
| NORMAL | G      | G      |
| NORMAL | A      | A      |
| NORMAL | GCCTTC | GCCTTC |
| NORMAL | T      | T      |
| NORMAL | -      | -      |
| NORMAL | A      | A      |
| NORMAL | T      | T      |
| NORMAL | G      | G      |
| NORMAL | T      | T      |
| NORMAL | C      | C      |
| NORMAL | T      | T      |
| NORMAL | G      | G      |
| NORMAL | C      | C      |
| NORMAL | -      | -      |
| NORMAL | C      | C      |
| NORMAL | A      | A      |
| NORMAL | G      | G      |

VEP annotated somatic variants

|        |   |   |
|--------|---|---|
| NORMAL | C | C |
| NORMAL | A | A |
| NORMAL | G | G |
| NORMAL | G | G |
| NORMAL | T | T |
| NORMAL | G | G |
| NORMAL | G | G |
| NORMAL | G | G |
| NORMAL | C | C |
| NORMAL | C | C |
| NORMAL | A | A |
| NORMAL | G | G |
| NORMAL | A | A |
| NORMAL | G | G |
| NORMAL | C | C |
| NORMAL | C | C |
| NORMAL | G | G |
| NORMAL | - | - |
| NORMAL | - | - |
| NORMAL | C | C |
| NORMAL | C | C |
| NORMAL | A | A |
| NORMAL | C | C |
| NORMAL | C | C |
| NORMAL | G | G |
| NORMAL | G | G |
| NORMAL | A | A |
| NORMAL | A | A |
| NORMAL | T | T |
| NORMAL | C | C |
| NORMAL | G | G |
| NORMAL | T | T |
| NORMAL | G | G |
| NORMAL | C | C |
| NORMAL | G | G |
| NORMAL | C | C |
| NORMAL | G | G |
| NORMAL | T | T |
| NORMAL | A | A |
| NORMAL | G | G |
| NORMAL | C | C |
| NORMAL | G | G |
| NORMAL | A | A |
| NORMAL | A | A |
| NORMAL | G | G |
| NORMAL | G | G |
| NORMAL | C | C |
| NORMAL | C | C |
| NORMAL | T | T |
| NORMAL | A | A |
| NORMAL | G | G |
| NORMAL | G | G |
| NORMAL | A | A |
| NORMAL | C | C |
| NORMAL | A | A |

VEP annotated somatic variants

|        |     |     |
|--------|-----|-----|
| NORMAL | A   | A   |
| NORMAL | C   | C   |
| NORMAL | G   | G   |
| NORMAL | C   | C   |
| NORMAL | G   | G   |
| NORMAL | G   | G   |
| NORMAL | C   | C   |
| NORMAL | G   | G   |
| NORMAL | GAC | GAC |
| NORMAL | A   | A   |
| NORMAL | A   | A   |
| NORMAL | C   | C   |
| NORMAL | C   | C   |
| NORMAL | A   | A   |
| NORMAL | A   | A   |
| NORMAL | G   | G   |
| NORMAL | T   | T   |
| NORMAL | C   | C   |
| NORMAL | C   | C   |
| NORMAL | G   | G   |
| NORMAL | G   | G   |
| NORMAL | G   | G   |
| NORMAL | G   | G   |
| NORMAL | G   | G   |
| NORMAL | T   | T   |
| NORMAL | A   | A   |
| NORMAL | G   | G   |
| NORMAL | G   | G   |
| NORMAL | TT  | TT  |
| NORMAL | T   | T   |
| NORMAL | G   | G   |
| NORMAL | G   | G   |
| NORMAL | T   | T   |
| NORMAL | T   | T   |
| NORMAL | C   | C   |
| NORMAL | C   | C   |
| NORMAL | C   | C   |
| NORMAL | G   | G   |
| NORMAL | C   | C   |
| NORMAL | -   | -   |
| NORMAL | G   | G   |
| NORMAL | T   | T   |
| NORMAL | C   | C   |
| NORMAL | G   | G   |
| NORMAL | T   | T   |
| NORMAL | C   | C   |
| NORMAL | A   | A   |
| NORMAL | T   | T   |
| NORMAL | G   | G   |
| NORMAL | G   | G   |
| NORMAL | T   | T   |
| NORMAL | G   | G   |
| NORMAL | T   | T   |
| NORMAL | -   | -   |
| NORMAL | C   | C   |



VEP annotated somatic variants

|        |           |           |
|--------|-----------|-----------|
| NORMAL | C         | C         |
| NORMAL | C         | C         |
| NORMAL | T         | T         |
| NORMAL | C         | C         |
| NORMAL | C         | C         |
| NORMAL | G         | G         |
| NORMAL | G         | G         |
| NORMAL | G         | G         |
| NORMAL | A         | A         |
| NORMAL | A         | A         |
| NORMAL | G         | G         |
| NORMAL | G         | G         |
| NORMAL | G         | G         |
| NORMAL | A         | A         |
| NORMAL | A         | A         |
| NORMAL | G         | G         |
| NORMAL | G         | G         |
| NORMAL | G         | G         |
| NORMAL | C         | C         |
| NORMAL | G         | G         |
| NORMAL | C         | C         |
| NORMAL | CGAAGAGTG | CGAAGAGTG |
| NORMAL | T         | T         |
| NORMAL | TT        | TT        |
| NORMAL | C         | C         |
| NORMAL | G         | G         |
| NORMAL | G         | G         |
| NORMAL | C         | C         |
| NORMAL | C         | C         |
| NORMAL | G         | G         |
| NORMAL | A         | A         |
| NORMAL | G         | G         |
| NORMAL | G         | G         |
| NORMAL | G         | G         |
| NORMAL | A         | A         |
| NORMAL | A         | A         |
| NORMAL | G         | G         |
| NORMAL | C         | C         |
| NORMAL | G         | G         |
| NORMAL | C         | C         |
| NORMAL | C         | C         |
| NORMAL | G         | G         |
| NORMAL | C         | C         |
| NORMAL | T         | T         |
| NORMAL | G         | G         |
| NORMAL | C         | C         |
| NORMAL | G         | G         |
| NORMAL | A         | A         |
| NORMAL | C         | C         |
| NORMAL | T         | T         |
| NORMAL | C         | C         |
| NORMAL | C         | C         |
| NORMAL | G         | G         |
| NORMAL | A         | A         |
| NORMAL | C         | C         |

VEP annotated somatic variants

|        |          |          |
|--------|----------|----------|
| NORMAL | A        | A        |
| NORMAL | T        | T        |
| NORMAL | C        | C        |
| NORMAL | C        | C        |
| NORMAL | ATAT     | ATAT     |
| NORMAL | T        | T        |
| NORMAL | A        | A        |
| NORMAL | G        | G        |
| NORMAL | T        | T        |
| NORMAL | C        | C        |
| NORMAL | C        | C        |
| NORMAL | G        | G        |
| NORMAL | G        | G        |
| NORMAL | G        | G        |
| NORMAL | C        | C        |
| NORMAL | A        | A        |
| NORMAL | A        | A        |
| NORMAL | G        | G        |
| NORMAL | A        | A        |
| NORMAL | G        | G        |
| NORMAL | T        | T        |
| NORMAL | C        | C        |
| NORMAL | C        | C        |
| NORMAL | G        | G        |
| NORMAL | G        | G        |
| NORMAL | C        | C        |
| NORMAL | G        | G        |
| NORMAL | T        | T        |
| NORMAL | C        | C        |
| NORMAL | G        | G        |
| NORMAL | C        | C        |
| NORMAL | T        | T        |
| NORMAL | G        | G        |
| NORMAL | -        | -        |
| NORMAL | C        | C        |
| NORMAL | C        | C        |
| NORMAL | T        | T        |
| NORMAL | C        | C        |
| NORMAL | G        | G        |
| NORMAL | G        | G        |
| NORMAL | T        | T        |
| NORMAL | C        | C        |
| NORMAL | C        | C        |
| NORMAL | C        | C        |
| NORMAL | AAACAAAC | AAACAAAC |
| NORMAL | C        | C        |
| NORMAL | A        | A        |
| NORMAL | -        | -        |
| NORMAL | G        | G        |
| NORMAL | T        | T        |
| NORMAL | G        | G        |
| NORMAL | C        | C        |
| NORMAL | C        | C        |
| NORMAL | G        | G        |
| NORMAL | A        | A        |

VEP annotated somatic variants

|        |                |                |
|--------|----------------|----------------|
| NORMAL | G              | G              |
| NORMAL | A              | A              |
| NORMAL | G              | G              |
| NORMAL | C              | C              |
| NORMAL | T              | T              |
| NORMAL | T              | T              |
| NORMAL | G              | G              |
| NORMAL | T              | T              |
| NORMAL | G              | G              |
| NORMAL | G              | G              |
| NORMAL | G              | G              |
| NORMAL | T              | T              |
| NORMAL | C              | C              |
| NORMAL | G              | G              |
| NORMAL | C              | C              |
| NORMAL | T              | T              |
| NORMAL | T              | T              |
| NORMAL | A              | A              |
| NORMAL | G              | G              |
| NORMAL | C              | C              |
| NORMAL | G              | G              |
| NORMAL | T              | T              |
| NORMAL | G              | G              |
| NORMAL | A              | A              |
| NORMAL | G              | G              |
| NORMAL | G              | G              |
| NORMAL | T              | T              |
| NORMAL | G              | G              |
| NORMAL | TAGGTTGACTATCA | TAGGTTGACTATCA |
| NORMAL | A              | A              |
| NORMAL | C              | C              |
| NORMAL | A              | A              |
| NORMAL | C              | C              |
| NORMAL | C              | C              |
| NORMAL | G              | G              |
| NORMAL | C              | C              |
| NORMAL | G              | G              |
| NORMAL | T              | T              |
| NORMAL | A              | A              |
| NORMAL | C              | C              |
| NORMAL | -              | -              |
| NORMAL | A              | A              |
| NORMAL | T              | T              |
| NORMAL | T              | T              |
| NORMAL | C              | C              |
| NORMAL | C              | C              |
| NORMAL | T              | T              |
| NORMAL | A              | A              |
| NORMAL | T              | T              |
| NORMAL | C              | C              |
| NORMAL | G              | G              |
| NORMAL | G              | G              |
| NORMAL | C              | C              |
| NORMAL | A              | A              |
| NORMAL | A              | A              |

VEP annotated somatic variants

|        |   |   |
|--------|---|---|
| NORMAL | - | - |
| NORMAL | T | T |
| NORMAL | C | C |
| NORMAL | T | T |
| NORMAL | T | T |
| NORMAL | C | C |
| NORMAL | T | T |
| NORMAL | C | C |
| NORMAL | A | A |
| NORMAL | G | G |
| NORMAL | A | A |
| NORMAL | G | G |
| NORMAL | C | C |
| NORMAL | A | A |
| NORMAL | C | C |
| NORMAL | A | A |
| NORMAL | G | G |
| NORMAL | T | T |
| NORMAL | G | G |
| NORMAL | G | G |
| NORMAL | G | G |
| NORMAL | C | C |
| NORMAL | G | G |
| NORMAL | T | T |
| NORMAL | T | T |
| NORMAL | A | A |
| NORMAL | T | T |
| NORMAL | C | C |
| NORMAL | A | A |
| NORMAL | A | A |
| NORMAL | A | A |
| NORMAL | C | C |
| NORMAL | A | A |
| NORMAL | T | T |
| NORMAL | C | C |
| NORMAL | G | G |
| NORMAL | A | A |
| NORMAL | C | C |
| NORMAL | T | T |
| NORMAL | G | G |
| NORMAL | G | G |
| NORMAL | G | G |
| NORMAL | C | C |
| NORMAL | G | G |
| NORMAL | T | T |
| NORMAL | C | C |
| NORMAL | G | G |
| NORMAL | C | C |
| NORMAL | T | T |
| NORMAL | C | C |
| NORMAL | G | G |
| NORMAL | G | G |
| NORMAL | C | C |
| NORMAL | C | C |
| NORMAL | T | T |

VEP annotated somatic variants

|        |                   |                    |
|--------|-------------------|--------------------|
| NORMAL | -                 | -                  |
| NORMAL | G                 | G                  |
| NORMAL | A                 | A                  |
| NORMAL | A                 | A                  |
| NORMAL | -                 | -                  |
| NORMAL | A                 | A                  |
| NORMAL | C                 | C                  |
| NORMAL | T                 | T                  |
| NORMAL | C                 | C                  |
| NORMAL | A                 | A                  |
| NORMAL | G                 | G                  |
| NORMAL | C                 | C                  |
| NORMAL | C                 | C                  |
| NORMAL | C                 | C                  |
| NORMAL | A                 | A                  |
| NORMAL | T                 | T                  |
| NORMAL | A                 | A                  |
| NORMAL | C                 | C                  |
| NORMAL | G                 | G                  |
| NORMAL | C                 | C                  |
| NORMAL | G                 | G                  |
| NORMAL | C                 | C                  |
| NORMAL | T                 | T                  |
| NORMAL | G                 | G                  |
| NORMAL | C                 | C                  |
| NORMAL | G                 | G                  |
| NORMAL | T                 | T                  |
| NORMAL | :CTCCTCCTCCTCCCTT | :CTCCTCCTCCTCCCTTA |
| NORMAL | G                 | G                  |
| NORMAL | G                 | G                  |
| NORMAL | G                 | G                  |
| NORMAL | A                 | A                  |
| NORMAL | G                 | G                  |
| NORMAL | A                 | A                  |
| NORMAL | C                 | C                  |
| NORMAL | G                 | G                  |
| NORMAL | C                 | C                  |
| NORMAL | A                 | A                  |
| NORMAL | G                 | G                  |
| NORMAL | G                 | G                  |
| NORMAL | G                 | G                  |
| NORMAL | A                 | A                  |
| NORMAL | T                 | T                  |
| NORMAL | C                 | C                  |
| NORMAL | G                 | G                  |
| NORMAL | A                 | A                  |
| NORMAL | T                 | T                  |
| NORMAL | C                 | C                  |
| NORMAL | T                 | T                  |
| NORMAL | C                 | C                  |
| NORMAL | A                 | A                  |
| NORMAL | G                 | G                  |
| NORMAL | C                 | C                  |
| NORMAL | C                 | C                  |

VEP annotated somatic variants

|        |   |   |
|--------|---|---|
| NORMAL | C | C |
| NORMAL | A | A |
| NORMAL | G | G |
| NORMAL | C | C |
| NORMAL | T | T |
| NORMAL | A | A |
| NORMAL | A | A |
| NORMAL | A | A |
| NORMAL | G | G |
| NORMAL | A | A |
| NORMAL | G | G |
| NORMAL | G | G |
| NORMAL | C | C |
| NORMAL | T | T |
| NORMAL | C | C |
| NORMAL | G | G |
| NORMAL | A | A |
| NORMAL | G | G |
| NORMAL | T | T |
| NORMAL | T | T |
| NORMAL | A | A |
| NORMAL | T | T |
| NORMAL | T | T |
| NORMAL | G | G |
| NORMAL | G | G |
| NORMAL | G | G |
| NORMAL | - | - |
| NORMAL | C | C |
| NORMAL | G | G |
| NORMAL | T | T |
| NORMAL | C | C |
| NORMAL | C | C |
| NORMAL | A | A |
| NORMAL | C | C |
| NORMAL | C | C |
| NORMAL | C | C |
| NORMAL | T | T |
| NORMAL | G | G |
| NORMAL | C | C |

VEP annotated somatic variants

**tumor\_Validation\_AlleleCh\_Norm\_Validation\_AlleCh\_Norm\_Validation\_All Verification\_Status**

## VEP annotated somatic variants



## VEP annotated somatic variants

## VEP annotated somatic variants

## VEP annotated somatic variants

## VEP annotated somatic variants

## VEP annotated somatic variants

## VEP annotated somatic variants

## VEP annotated somatic variants

## VEP annotated somatic variants



## VEP annotated somatic variants

## VEP annotated somatic variants

## VEP annotated somatic variants

## VEP annotated somatic variants

## VEP annotated somatic variants

## VEP annotated somatic variants

## VEP annotated somatic variants

## VEP annotated somatic variants



## VEP annotated somatic variants

## VEP annotated somatic variants

## VEP annotated somatic variants

## VEP annotated somatic variants

## VEP annotated somatic variants

## VEP annotated somatic variants

## VEP annotated somatic variants

## VEP annotated somatic variants



## VEP annotated somatic variants

## VEP annotated somatic variants

## VEP annotated somatic variants

## VEP annotated somatic variants

VEP annotated somatic variants

**Validation\_Status**      **Mutation\_Status**      **Sequencing\_Phase**      **Sequence\_Source**

## VEP annotated somatic variants

## VEP annotated somatic variants

## VEP annotated somatic variants



## VEP annotated somatic variants

## VEP annotated somatic variants

## VEP annotated somatic variants

## VEP annotated somatic variants

## VEP annotated somatic variants

## VEP annotated somatic variants

## VEP annotated somatic variants

## VEP annotated somatic variants



## VEP annotated somatic variants

## VEP annotated somatic variants

## VEP annotated somatic variants

## VEP annotated somatic variants

## VEP annotated somatic variants

## VEP annotated somatic variants

## VEP annotated somatic variants

## VEP annotated somatic variants



## VEP annotated somatic variants

## VEP annotated somatic variants

## VEP annotated somatic variants

## VEP annotated somatic variants

## VEP annotated somatic variants

## VEP annotated somatic variants

## VEP annotated somatic variants

## VEP annotated somatic variants



## VEP annotated somatic variants

## VEP annotated somatic variants

VEP annotated somatic variants

**Validation\_Method**

**Score**

**BAM\_File**

**Sequencer**

## VEP annotated somatic variants



## VEP annotated somatic variants

## VEP annotated somatic variants

## VEP annotated somatic variants

## VEP annotated somatic variants

## VEP annotated somatic variants

## VEP annotated somatic variants

## VEP annotated somatic variants

## VEP annotated somatic variants



## VEP annotated somatic variants

## VEP annotated somatic variants

## VEP annotated somatic variants

## VEP annotated somatic variants

## VEP annotated somatic variants

## VEP annotated somatic variants

## VEP annotated somatic variants

## VEP annotated somatic variants



## VEP annotated somatic variants

## VEP annotated somatic variants

## VEP annotated somatic variants

## VEP annotated somatic variants

## VEP annotated somatic variants

## VEP annotated somatic variants

## VEP annotated somatic variants

## VEP annotated somatic variants



VEP annotated somatic variants

| Tumor_Sample_UUID | tched_Norm_Sample_UI | HGVSc                                   | HGVSp       |
|-------------------|----------------------|-----------------------------------------|-------------|
|                   |                      | c.361+98_361+99insAA                    |             |
|                   |                      | c.553+23A>G                             |             |
|                   |                      | c.687+71C>G                             |             |
|                   |                      | c.783T>C                                | p.=         |
|                   |                      | c.*35G>A                                |             |
|                   |                      | c.301+85A>C                             |             |
|                   |                      | c.2741-20T>C                            |             |
|                   |                      | c.1791+26T>C                            |             |
|                   |                      | c.4038T>A                               | p.=         |
|                   |                      | c.1868-85delG                           |             |
|                   |                      | c.3819G>A                               | p.=         |
|                   |                      | c.-61_-52dupTCGCCCGCTC                  |             |
|                   |                      | c.2342+5C>T                             |             |
|                   |                      | c.340G>A                                | p.Ala114Thr |
|                   |                      | c.1093-50C>A                            |             |
|                   |                      | c.30+67C>G                              |             |
|                   |                      | c.1229-84C>T                            |             |
|                   |                      | c.1376-83A>G                            |             |
|                   |                      | c.-42C>T                                |             |
|                   |                      | c.639+94C>T                             |             |
|                   |                      | c.239-6G>A                              |             |
|                   |                      | c.1072-31C>T                            |             |
|                   |                      | c.666+73C>T                             |             |
|                   |                      | c.201+89C>T                             |             |
|                   |                      | c.810+5G>A                              |             |
|                   |                      | c.2305C>T                               | p.Pro769Ser |
|                   |                      | c.1192-91_1192-90insTTAT                |             |
|                   |                      | c.2818C>A                               | p.Leu940Met |
|                   |                      | c.2291-43T>C                            |             |
|                   |                      | c.868-9delT                             |             |
|                   |                      | c.1549-17G>A                            |             |
|                   |                      | c.1223+39T>C                            |             |
|                   |                      | c.2217+23A>G                            |             |
|                   |                      | c.342-14456_342-14442delTCCTCCCCCTATCTG |             |
|                   |                      | c.621A>G                                | p.=         |
|                   |                      | c.2965-16T>C                            |             |
|                   |                      | c.1359+29G>A                            |             |
|                   |                      | c.478+77dupG                            |             |
|                   |                      | c.64-43T>C                              |             |
|                   |                      | c.573C>T                                | p.=         |
|                   |                      | c.2623+85A>G                            |             |
|                   |                      | c.-4-71G>A                              |             |
|                   |                      | c.48T>C                                 | p.=         |
|                   |                      | c.1449+55G>A                            |             |
|                   |                      | c.1417-43G>A                            |             |
|                   |                      | c.286G>A                                | p.Val96Ile  |
|                   |                      | c.588C>T                                | p.=         |
|                   |                      | c.879+156T>C                            |             |
|                   |                      | c.6945+8C>T                             |             |
|                   |                      | c.4149-59C>G                            |             |
|                   |                      | c.909-11C>T                             |             |
|                   |                      | c.1058+47C>A                            |             |

VEP annotated somatic variants

|                           |              |
|---------------------------|--------------|
| c.321-35G>A               |              |
| c.1392-42T>A              |              |
| c.1451+82C>T              |              |
| c.-74A>C                  |              |
| c.4735+37C>T              |              |
| c.911+92A>G               |              |
| c.772+26T>C               |              |
| c.4341G>A                 | p.=          |
| c.426+42A>C               |              |
| c.3031+23_3031+27delTTTTT |              |
| c.480+24G>A               |              |
| c.2616-97C>T              |              |
| c.3025T>C                 | p.Phe1009Leu |
| c.2376-16A>G              |              |
| c.1874-7T>C               |              |
| c.804G>A                  | p.=          |
| c.463-41G>A               |              |
| c.483+60G>A               |              |
| c.2480+90T>A              |              |
| c.-462C>T                 |              |
| c.1537-74A>G              |              |
| c.1455+52G>C              |              |
| c.703-36C>T               |              |
| c.1066G>A                 | p.Gly356Arg  |
| c.1-99C>T                 |              |
| c.395-30G>T               |              |
| c.83T>G                   | p.Leu28Arg   |
| c.-64A>G                  |              |
| c.447+90T>C               |              |
| c.1918G>T                 | p.Val640Phe  |
| c.148+91_148+92delCC      |              |
| c.2050A>G                 | p.Met684Val  |
| c.403+11T>C               |              |
| c.1104+13T>C              |              |
| c.1806G>A                 | p.=          |
| c.1283-89G>A              |              |
| c.635-67G>A               |              |
| c.1099T>G                 | p.Leu367Val  |
| c.543T>C                  | p.=          |
| c.865+84T>C               |              |
| c.492G>A                  | p.=          |
| c.795+68C>T               |              |
| c.-196C>T                 |              |
| c.250A>G                  | p.Arg84Gly   |
| c.6009C>T                 | p.=          |
| c.843-27A>G               |              |
| c.341+92C>A               |              |
| c.274+6G>A                |              |
| c.585G>T                  | p.Trp195Cys  |
| c.1698+53A>C              |              |
| c.317-15G>A               |              |
| c.716-93T>C               |              |
| c.187+30delT              |              |

VEP annotated somatic variants

|                 |             |
|-----------------|-------------|
| c.-69C>A        |             |
| c.963+97G>A     |             |
| c.1354-50C>T    |             |
| c.456-50C>T     |             |
| c.638-60T>C     |             |
| c.2654-35158C>G |             |
| c.716-49G>A     |             |
| c.1161+86T>A    |             |
| c.76+47A>G      |             |
| c.574-24G>C     |             |
| c.*350G>A       |             |
| c.1005C>T       | p.=         |
| c.2259C>T       | p.=         |
| c.2970-39C>G    |             |
| c.986+17C>G     |             |
| c.*30+81G>T     |             |
| c.2782-29C>A    |             |
| c.-22-28A>T     |             |
| c.1294-60C>T    |             |
| c.2637-41C>T    |             |
| c.1882+22A>G    |             |
| c.2172+52C>T    |             |
| c.833-41C>T     |             |
| c.848-6T>C      |             |
| c.1564A>C       | p.Ile522Leu |
| c.2463-85dupG   |             |
| c.983G>A        | p.Arg328His |
| c.352-63C>T     |             |
| c.1491+61G>A    |             |
| c.1157G>A       | p.Arg386Gln |
| c.-34T>G        |             |
| c.93-66A>G      |             |
| c.4853+21C>T    |             |
| c.457-72G>T     |             |
| c.2764+2T>A     |             |
| c.205-56C>T     |             |
| c.308A>G        | p.Asn103Ser |
| c.99+1475T>C    |             |
| c.1258+96G>A    |             |
| c.6477+33G>T    |             |
| c.5215+66G>A    |             |
| c.5137+65G>A    |             |
| c.4548-63C>G    |             |
| c.681+56C>T     |             |
| c.1423-50G>A    |             |
| c.864C>T        | p.=         |
| c.1312-37T>C    |             |
| c.68-14T>C      |             |
| c.656-71C>T     |             |
| c.1453-105G>T   |             |
| c.992G>A        | p.Gly331Asp |
| c.544+78T>A     |             |
| c.148+59G>A     |             |
| c.993G>T        | p.=         |
| c.4984-45T>C    |             |

VEP annotated somatic variants

|                              |                    |
|------------------------------|--------------------|
| c.4272T>C                    | p.=                |
| c.1244-68C>T                 |                    |
| c.822-71G>A                  |                    |
| c.164A>G                     | p.Gln55Arg         |
| c.1540-23C>T                 |                    |
| c.550_551delAT               | p.Met184AspfsTer14 |
| c.434+86_434+89delGAGA       |                    |
|                              |                    |
| c.*49T>C                     |                    |
| c.1112A>G                    | p.His371Arg        |
| c.-7T>C                      |                    |
| c.393T>A                     | p.Asp131Glu        |
| c.1734A>G                    | p.=                |
| c.347-7128_347-7125delATTA   |                    |
| c.1228-73A>G                 |                    |
| c.1000+6C>G                  |                    |
| c.296-46T>C                  |                    |
| c.*10C>G                     |                    |
| c.28-83A>T                   |                    |
| c.2441-24C>A                 |                    |
| c.177+94C>A                  |                    |
| c.3391-35T>C                 |                    |
| c.4017+17C>G                 |                    |
| c.-333T>C                    |                    |
| c.567+71C>T                  |                    |
| c.790-34T>C                  |                    |
| c.645C>T                     | p.=                |
| c.2446C>T                    | p.Leu816Phe        |
| c.5941-93_5941-88delGTGTGT   |                    |
| c.1974+8A>C                  |                    |
| c.2663+79C>T                 |                    |
| c.1152+78G>T                 |                    |
| c.3312+10G>C                 |                    |
| c.334-89T>C                  |                    |
| c.2478+95C>G                 |                    |
| c.1795-85C>T                 |                    |
| c.-71G>A                     |                    |
| c.*41G>A                     |                    |
| c.517+95C>T                  |                    |
| c.437+38C>T                  |                    |
| c.849C>T                     | p.=                |
| c.1237+63C>T                 |                    |
| c.283+96C>T                  |                    |
| c.262-13C>T                  |                    |
| c.1383+22A>G                 |                    |
| c.772+16C>T                  |                    |
| c.*97C>T                     |                    |
| c.365-88G>C                  |                    |
| c.3868+98C>T                 |                    |
| c.1316-57C>G                 |                    |
| c.27C>T                      | p.=                |
| c.1293G>A                    | p.=                |
| c.640+37_640+46delTGAATACATA |                    |
| c.733G>A                     | p.Val245Met        |

VEP annotated somatic variants

|                               |                    |
|-------------------------------|--------------------|
| c.778-12A>T                   |                    |
| c.*67G>A                      |                    |
| c.*23A>G                      |                    |
| c.497+65T>C                   |                    |
| c.570A>G                      | p.=                |
| c.2024A>T                     | p.Glu675Val        |
| c.280-12528G>A                |                    |
| c.3356+21G>A                  |                    |
| c.156C>T                      | p.=                |
| c.303+38C>A                   |                    |
| c.298+18G>A                   |                    |
| c.50-61G>A                    |                    |
| c.941+103G>A                  |                    |
| c.2390A>G                     | p.Asn797Ser        |
| c.608delA                     | p.His203ProfsTer5  |
| c.975+39T>C                   |                    |
| c.774+59delT                  |                    |
| c.776A>C                      | p.Lys259Thr        |
| c.673+58A>G                   |                    |
| c.515_541delACCCGCCAGCAGCCTCT | p.Asp172_Pro180del |
|                               |                    |
| c.1953+62A>G                  |                    |
| c.*1+24G>T                    |                    |
| c.1574A>G                     | p.Gln525Arg        |
| c.229-51G>A                   |                    |
| c.1111-80C>G                  |                    |
| c.116+17C>A                   |                    |
| c.528-74A>T                   |                    |
| c.1227A>G                     | p.=                |
| c.2980+57C>A                  |                    |
| c.57+14C>A                    |                    |
| c.86-34C>T                    |                    |
| c.-6T>C                       |                    |
| c.65-57G>A                    |                    |
| c.425-1789_425-1788insGAA     |                    |
| c.1081+78G>A                  |                    |
| c.1306-78A>C                  |                    |
| c.755G>A                      | p.Arg252His        |
| c.935+62A>G                   |                    |
| c.552A>G                      | p.=                |
| c.592-20delA                  |                    |
| c.83G>T                       | p.Arg28Leu         |
| c.1050+86C>T                  |                    |
| c.3167+99T>A                  |                    |
| c.-25-96T>C                   |                    |
| c.222+31C>T                   |                    |
| c.404G>A                      | p.Ser135Asn        |
| c.590-64A>T                   |                    |
| c.1070+88A>G                  |                    |
| c.1474+97T>A                  |                    |
| c.1204C>T                     | p.His402Tyr        |
| c.4389G>A                     | p.=                |
| c.-35A>G                      |                    |
| c.39G>C                       | p.=                |
| c.343+56C>T                   |                    |

VEP annotated somatic variants

|                                            |              |
|--------------------------------------------|--------------|
| c.403+68A>G                                |              |
| c.545C>T                                   | p.Ala182Val  |
| c.*68T>C                                   |              |
| c.*6G>A                                    |              |
| c.2888+34C>T                               |              |
| c.633C>T                                   | p.=          |
| c.5702+64C>A                               |              |
| c.366C>G                                   | p.His122Gln  |
| c.1141-15T>C                               |              |
| c.1372+20C>A                               |              |
| c.1227+83G>A                               |              |
| c.*93G>A                                   |              |
| c.-25A>G                                   |              |
| c.*19A>C                                   |              |
| c.309-1G>T                                 |              |
| c.1006-50G>A                               |              |
| c.1534+41G>A                               |              |
| c.1977-95G>C                               |              |
| c.2340+88G>A                               |              |
| c.4716C>T                                  | p.=          |
| c.1036-93A>G                               |              |
| c.1359G>A                                  | p.=          |
| c.1486+67C>A                               |              |
| c.3381+17A>C                               |              |
| c.3248-4A>G                                |              |
| c.5656-81T>G                               |              |
| c.3525G>A                                  | p.=          |
| c.1482-25T>C                               |              |
| c.1120-43T>C                               |              |
| c.3278-76_3278-75insTTTCAACATTGTCTCCATTCGG |              |
| c.703-67G>T                                |              |
| c.2463+60A>G                               |              |
| c.2257-71A>T                               |              |
| c.1240G>A                                  | p.Ala414Thr  |
| c.2519-46A>G                               |              |
| c.4098+57C>A                               |              |
| c.1399-32T>C                               |              |
| c.1897+66_1897+68delCAA                    |              |
| c.408C>G                                   | p.=          |
| c.157+13A>G                                |              |
| c.2285+72C>G                               |              |
| c.191-159G>A                               |              |
| c.*54C>A                                   |              |
| c.3154A>G                                  | p.Ile1052Val |
| c.1054+1196G>A                             |              |
| c.396+45T>C                                |              |
| c.505+91G>A                                |              |
| c.749-88C>A                                |              |
| c.777C>A                                   | p.=          |
| c.2029-61_2029-60insACAGACAATGCCCAA        |              |
| c.700-28A>T                                |              |
| c.1730+79A>C                               |              |
| c.-33C>T                                   |              |
| c.-15C>A                                   |              |
| c.621+43T>A                                |              |

VEP annotated somatic variants

|                          |              |
|--------------------------|--------------|
| c.3912T>C                | p.=          |
| c.-11-33C>T              |              |
| c.4488G>A                | p.=          |
| c.292+13A>G              |              |
| c.423G>A                 | p.=          |
| c.1911C>T                | p.=          |
| c.35+143T>C              |              |
| c.4715T>C                | p.Leu1572Pro |
| c.64-93C>G               |              |
| c.2932G>A                | p.Gly978Arg  |
| c.1919+24T>A             |              |
| c.2403G>A                | p.=          |
| c.1327C>T                | p.His443Tyr  |
| c.-55G>A                 |              |
| c.756+26G>T              |              |
| c.152-57C>T              |              |
| c.1304-56T>G             |              |
| c.1162-64C>T             |              |
| c.798+50_798+51delTT     |              |
| c.38C>T                  | p.Pro13Leu   |
| c.292-52G>T              |              |
| c.63G>A                  | p.=          |
| c.124+67A>G              |              |
| c.715-52T>C              |              |
| c.366+61A>C              |              |
| c.234T>C                 | p.=          |
| c.133-78G>A              |              |
| c.2053+13A>G             |              |
| c.1017C>T                | p.=          |
| c.-80G>C                 |              |
| c.348T>C                 | p.=          |
| c.1290-93T>C             |              |
| c.881-95T>C              |              |
| c.1596+34C>A             |              |
| c.1488+88T>G             |              |
| c.670G>C                 | p.Glu224Gln  |
| c.48+53C>G               |              |
| c.625+80C>T              |              |
| c.591+44C>T              |              |
| c.460-34G>A              |              |
| c.1544-193_1544-192dupCA |              |
| c.738+13G>A              |              |
| c.1728+91A>G             |              |
| c.3264-32G>A             |              |
| c.1281-26A>G             |              |
| c.2325+47G>A             |              |
| c.*78_*81delCTCA         |              |
| c.*68A>G                 |              |
| c.1981+609C>T            |              |
| c.112-100C>T             |              |
| c.1825+96T>C             |              |
| c.358-300A>G             |              |
| c.4189-28C>A             |              |
| c.-55-80G>A              |              |

VEP annotated somatic variants

|                                   |             |
|-----------------------------------|-------------|
| c.1191+71G>A                      |             |
| c.2466+38T>C                      |             |
| c.9945+96T>C                      |             |
| c.4477-37T>C                      |             |
| c.8726+54C>T                      |             |
| c.8190+9T>G                       |             |
| c.8545-65A>G                      |             |
| c.11340+76T>G                     |             |
| c.9445-23A>G                      |             |
| c.346-80C>A                       |             |
| c.3537+71T>C                      |             |
| c.12298-36T>C                     |             |
| c.463+6T>C                        |             |
| c.386-20G>A                       |             |
| c.4548+22delC                     |             |
| c.3877-55C>G                      |             |
| c.4250-63C>T                      |             |
| c.3438G>A                         | p.=         |
| c.1051G>C                         | p.Glu351Gln |
| c.676+40T>G                       |             |
| c.531-100G>C                      |             |
| c.1900+3G>A                       |             |
| c.847+5C>A                        |             |
| c.2247-9C>T                       |             |
| c.1698+48G>C                      |             |
| c.2629-52G>A                      |             |
| c.2362+43C>T                      |             |
| c.84+83_84+86delTTTA              |             |
| c.3123C>A                         | p.=         |
| c.30C>T                           | p.=         |
| c.273+10C>T                       |             |
| c.2195-66A>C                      |             |
| c.181+73C>T                       |             |
| c.110+52T>G                       |             |
| c.219-51A>G                       |             |
| c.279G>A                          | p.=         |
| c.-39C>G                          |             |
| c.430T>G                          | p.Ser144Ala |
| c.795-38G>A                       |             |
| c.11955+73T>C                     |             |
| c.-93T>C                          |             |
| c.77G>T                           | p.Arg26Leu  |
| c.1022C>T                         | p.Thr341Ile |
| c.1507-30G>C                      |             |
| c.1428+31C>A                      |             |
| c.66+81C>T                        |             |
| c.205-75G>T                       |             |
| c.233+30G>T                       |             |
| c.1071+35T>A                      |             |
| c.2339+67C>A                      |             |
| c.324+88A>G                       |             |
| c.87+306_87+307insGGTGATTCCCACCCC |             |
| c.806-69A>G                       |             |
| c.307+63_307+66delCTCT            |             |
| c.762+25G>T                       |             |



VEP annotated somatic variants

|                                      |              |
|--------------------------------------|--------------|
| c.372G>A                             | p.=          |
| c.160-72C>A                          |              |
| c.1059-31T>C                         |              |
| c.99C>T                              | p.=          |
| c.1509G>A                            | p.=          |
| c.417C>T                             | p.=          |
| c.1509C>A                            | p.=          |
| c.1218T>C                            | p.=          |
| c.1150+70C>T                         |              |
| c.631-4C>T                           |              |
| c.1034G>C                            | p.Ser345Thr  |
| c.807+60A>T                          |              |
| c.592-74A>G                          |              |
| c.1723T>C                            | p.Ser575Pro  |
| c.884+40G>C                          |              |
| c.884+41A>G                          |              |
| c.489G>A                             | p.=          |
| c.1742-72T>C                         |              |
| c.208+60G>A                          |              |
| c.53-26T>C                           |              |
| <br>                                 |              |
| c.1435+68C>A                         |              |
| c.1747+31G>A                         |              |
| c.416A>G                             | p.His139Arg  |
| c.1236C>T                            | p.=          |
| c.581-52G>T                          |              |
| c.2225-56A>G                         |              |
| c.1768G>A                            | p.Gly590Arg  |
| c.512C>T                             | p.Thr171Ile  |
| c.734C>T                             | p.Thr245Met  |
| c.6G>A                               | p.=          |
| c.1479+89G>A                         |              |
| c.327+9C>T                           |              |
| c.988-53C>T                          |              |
| c.1012-85T>A                         |              |
| c.3150G>A                            | p.=          |
| c.590+99T>A                          |              |
| c.1765G>A                            | p.Glu589Lys  |
| c.2533-71G>T                         |              |
| c.96+37A>G                           |              |
| c.3780C>G                            | p.Asp1260Glu |
| c.1010-27G>A                         |              |
| c.1120G>A                            | p.Val374Ile  |
| c.193-24T>A                          |              |
| c.744+47C>G                          |              |
| c.747+17G>C                          |              |
| c.364+85T>G                          |              |
| c.716G>A                             | p.Arg239His  |
| c.189+6969_189+6970insCG             |              |
| c.189+6970_189+6971insCCTAGATGCAGGAG |              |
| c.*27C>G                             |              |
| c.*244C>A                            |              |
| c.297+12A>G                          |              |
| c.348C>T                             | p.=          |
| c.70+24C>T                           |              |

VEP annotated somatic variants

|                                    |                  |
|------------------------------------|------------------|
| c.*74G>A                           |                  |
| c.2346+27A>C                       |                  |
| c.7034+89G>T                       |                  |
| c.282+100G>T                       |                  |
| c.-42C>G                           |                  |
| c.655+39C>T                        |                  |
| c.3000T>C                          | p.=              |
| c.560C>T                           | p.Ala187Val      |
| c.827-10C>T                        |                  |
| c.249-35A>G                        |                  |
| c.855+58A>G                        |                  |
| c.387A>C                           | p.=              |
| c.*18T>C                           |                  |
| c.1032-19T>C                       |                  |
| c.1893+1626C>T                     |                  |
| c.3651C>T                          | p.=              |
| c.3732+52C>T                       |                  |
| c.3224-18C>T                       |                  |
| c.464C>T                           | p.Pro155Leu      |
| c.5896C>G                          | p.His1966Asp     |
| c.579+53G>A                        |                  |
| n.926G>A                           |                  |
| c.2697-16C>T                       |                  |
| c.1570-87T>C                       |                  |
| c.557+98C>T                        |                  |
| c.406-84G>T                        |                  |
| c.675+37C>A                        |                  |
| c.314-95G>A                        |                  |
| c.1152G>A                          | p.=              |
| c.1162G>A                          | p.Gly388Arg      |
| c.*16C>T                           |                  |
| c.1197-5086T>C                     |                  |
| c.2952C>T                          | p.=              |
| c.1197-4807C>T                     |                  |
| c.26-12C>A                         |                  |
| c.923+74_923+75insCCTTTTAAACAACCAG |                  |
| c.594G>A                           | p.=              |
| c.222-13C>T                        |                  |
| c.1286C>T                          | p.Thr429Met      |
| c.1748-61A>G                       |                  |
| c.3001+69_3001+70insTAGGGTAACC     |                  |
| c.4765+69T>C                       |                  |
| c.4307+76G>A                       |                  |
| c.441C>T                           | p.=              |
| c.172_177delACCACC                 | p.Thr58_Thr59del |
| c.314-67G>A                        |                  |
| c.5175-16C>T                       |                  |
| c.2091C>G                          | p.=              |
| c.1284T>C                          | p.=              |
| c.301-78G>A                        |                  |
| c.*192T>C                          |                  |
| c.1947T>C                          | p.=              |
| c.7682+85C>G                       |                  |

VEP annotated somatic variants

|                |             |
|----------------|-------------|
| c.8439C>T      | p.=         |
| c.1820-26G>A   |             |
| c.8604+28A>T   |             |
| c.3987C>A      | p.=         |
| c.1898+85G>A   |             |
| c.559+49A>T    |             |
| c.1458+59C>T   |             |
| c.1587C>T      | p.=         |
| c.-2-33A>T     |             |
| c.-11T>G       |             |
| c.65-60A>G     |             |
| c.3057+67A>G   |             |
| c.1393-41G>T   |             |
| c.1662-27G>A   |             |
| c.382+60delC   |             |
| c.1671-15C>T   |             |
| c.611+34G>A    |             |
| c.1057-77A>G   |             |
| c.1420C>A      | p.Gln474Lys |
| c.157T>G       | p.Tyr53Asp  |
| c.1543G>T      | p.Val515Phe |
| c.1056A>G      | p.=         |
| c.1469C>T      | p.Ala490Val |
| c.*94dupA      |             |
| c.-148G>C      |             |
| c.-19-57C>T    |             |
| c.1647+33T>A   |             |
| c.660C>T       | p.=         |
| c.1095C>T      | p.=         |
| c.926-34528A>G |             |
| c.988+7A>G     |             |
| c.548-61C>G    |             |
| c.347-28A>G    |             |
| c.345+56A>G    |             |
| c.1380+73A>G   |             |
| c.44-32G>A     |             |
| c.1438G>C      | p.Ala480Pro |
| c.1550C>T      | p.Ala517Val |
| c.1405C>T      | p.Arg469Cys |
| c.278-42G>A    |             |
| c.289G>A       | p.Val97Ile  |
| c.2652C>T      | p.=         |
| c.2318+23A>T   |             |
| c.776-81G>T    |             |
| c.-7C>T        |             |
| c.253A>G       | p.Ile85Val  |
| c.494+41A>C    |             |
| c.880+32C>T    |             |
| c.186+61A>G    |             |
| c.934+80A>T    |             |
| c.309C>T       | p.=         |
| c.110G>A       | p.Arg37His  |
| c.453C>T       | p.=         |
| c.3042C>T      | p.=         |

VEP annotated somatic variants

|                      |             |
|----------------------|-------------|
| c.-5T>C              |             |
| c.1248G>A            | p.=         |
| c.822-32T>C          |             |
| c.771+76_771+77delCG |             |
| c.21G>T              | p.=         |
| c.370G>T             | p.Val124Leu |
| c.652G>C             | p.Ala218Pro |
| c.-161C>T            |             |
| c.131+24G>A          |             |
| c.401+20G>A          |             |
| c.172+25G>C          |             |
| c.1425T>C            | p.=         |
| c.540+82T>A          |             |
| c.930+100C>A         |             |
| c.1478+100G>T        |             |
| c.809+56G>A          |             |
| c.3322+81T>A         |             |
| c.721-50G>A          |             |
| c.268+18363T>A       |             |
| c.1789C>T            | p.=         |
| c.227-87G>C          |             |
| c.1847C>T            | p.Thr616Met |
| c.-64C>T             |             |
| c.445-16C>T          |             |
| c.15+318C>T          |             |
| c.1191+80C>T         |             |
| c.*2239G>T           |             |
| c.2957-68C>T         |             |
| c.*40C>A             |             |
| c.716-35A>G          |             |
| c.91-98G>T           |             |
| c.350-60T>G          |             |
| c.2355+50A>G         |             |
| c.3170+76C>T         |             |
| c.379-22C>T          |             |
| c.525G>A             | p.=         |
| c.5355+28C>T         |             |
| c.2242-15C>T         |             |
| c.1842G>A            | p.=         |
| c.1895T>C            | p.Val632Ala |
| c.2155+84A>T         |             |
| c.141-59A>T          |             |
| c.1229+57A>C         |             |
| c.31+20T>C           |             |
| c.867-45C>T          |             |
| c.1027-97G>T         |             |
| c.187C>G             | p.His63Asp  |
| c.1008G>A            | p.=         |
| c.288+32C>G          |             |
| c.1730+666G>A        |             |
| c.39C>T              | p.=         |
| c.216+289G>T         |             |
| c.*89C>T             |             |
| c.-20+107G>A         |             |

VEP annotated somatic variants

|                         |              |
|-------------------------|--------------|
| c.48C>T                 | p.=          |
| c.591+34delC            |              |
| c.619C>A                | p.Leu207Met  |
| c.1681-30G>A            |              |
| c.1375+57_1375+59delAAA |              |
| c.606G>T                | p.=          |
| c.1297+59G>A            |              |
| c.494G>T                | p.Gly165Val  |
| c.527-51T>A             |              |
| c.1519-78G>A            |              |
| c.1386G>A               | p.=          |
| c.455-21dupC            |              |
| c.516G>A                | p.=          |
| c.198+4C>A              |              |
| c.12T>A                 | p.=          |
| c.2109A>G               | p.=          |
| c.5987G>A               | p.Arg1996His |
| c.382G>A                | p.Val128Ile  |
| c.407-74T>A             |              |
| c.*5909T>C              |              |
| c.207+94C>G             |              |
| c.780-92A>G             |              |
| c.536G>C                | p.Ser179Thr  |
| c.28T>G                 | p.Phe10Val   |
| c.2956+72A>G            |              |
| c.1765+64T>G            |              |
| c.6996-5T>A             |              |
| c.2899-56G>A            |              |
| c.80-80C>T              |              |
| c.1347A>G               | p.=          |
| c.2571T>C               | p.=          |
| c.952+76C>T             |              |
| c.581-66C>T             |              |
| c.999G>T                | p.Glu333Asp  |
| c.425-15T>C             |              |
| c.696+3A>G              |              |
| c.967+68_967+71delAGGC  |              |
| c.3069G>C               | p.=          |
| c.1090+31_1090+32delGG  |              |
| c.530C>A                | p.Ser177Tyr  |
| c.177-55G>A             |              |
| c.*70G>A                |              |
| c.*57A>C                |              |
| c.*9C>T                 |              |
| c.408-73T>C             |              |
| c.1650G>A               | p.=          |
| c.1610+28A>C            |              |
| c.1425+27C>T            |              |
| c.6347+50A>T            |              |
| c.1275+98C>T            |              |
| c.1521+57A>G            |              |
| c.3423-40delG           |              |
| c.3114+22C>A            |              |
| c.1299+93C>A            |              |
| c.957G>C                | p.=          |

VEP annotated somatic variants

c.2835-60A>G  
 c.2089+20T>C  
 c.1385+39T>C  
 c.1840-13G>A  
 c.1540-83A>G  
 c.390G>A p.=  
 c.2297-63A>G  
 c.552+28T>C  
 c.1933-26A>G  
 c.526-58G>A  
 c.6946-99\_6946-98insCAGCTTC  
 c.1714-4C>A  
 c.729C>T p.=  
 c.4174-47G>A  
 c.3784-69G>C  
 c.297-67C>T  
 c.285-76G>A  
 c.1948-20A>G  
 c.181+50G>A  
 c.906+9C>G  
 c.1206C>T p.=  
 c.\*49\_\*50delTT  
 c.\*54C>T  
 c.2884-81T>C  
 c.1578C>T p.=  
 c.2781C>T p.=  
 c.234G>A p.=  
 c.566C>G p.Pro189Arg  
 c.866-63C>A  
 c.378-33G>T  
 n.1143+41G>A  
 c.217+12C>G  
 c.-57C>T  
 c.4239+18G>A  
 c.1734+61G>A  
 c.2086-13C>T  
 c.228+40C>A  
 c.2177C>A p.Thr726Lys  
 c.1052-25G>C  
 c.1612A>C p.=  
 c.1930C>A p.Arg644Ser  
 c.33C>T p.=  
 c.901+120C>A  
 c.2065T>G p.Ser689Ala  
 c.3879+55\_3879+62delGTGTGTGT  
 c.3486C>T p.=  
 c.28-79T>A  
 c.1554+39G>T  
 c.270C>T p.=  
 c.456+70C>T  
 c.799-96\_799-95insAAGGCCCGGGCCCTGGCTGGGGAGGCCCATGATTA ACTCTTAAGAA  
 c.1336-73C>A  
 c.3976+101\_3976+102delTC  
 c.842-25T>A  
 c.799-20A>G

VEP annotated somatic variants

|                                       |             |
|---------------------------------------|-------------|
| c.648A>C                              | p.=         |
| c.39A>G                               | p.=         |
| c.1378-59A>T                          |             |
| c.357+42T>A                           |             |
| c.14461-53A>G                         |             |
| c.3387+25C>A                          |             |
| c.4884+8A>G                           |             |
| c.936G>A                              | p.=         |
| c.1416+42G>A                          |             |
| c.632-55C>T                           |             |
| c.1749-80C>A                          |             |
| c.709-38C>G                           |             |
| c.*67A>T                              |             |
| c.*4T>C                               |             |
| c.*33T>C                              |             |
| c.330T>C                              | p.=         |
| c.1251+20C>T                          |             |
| c.4717+61delC                         |             |
| c.284-85A>G                           |             |
| c.1077+64C>T                          |             |
| c.967-34C>A                           |             |
| c.3486+17G>A                          |             |
| c.1021+64T>C                          |             |
| c.3999+69G>A                          |             |
| c.-6C>A                               |             |
| c.1446T>C                             | p.=         |
| c.-46G>T                              |             |
| c.448-257_448-256insCCAGGTCACCTGCACCT |             |
| c.805+60G>A                           |             |
| c.1695+100G>A                         |             |
| c.736-51C>A                           |             |
| c.656-19G>A                           |             |
| c.1152+74G>A                          |             |
| c.1277G>A                             | p.Arg426His |
| c.1082+179G>A                         |             |
| c.1509-35G>A                          |             |
| c.2219+55T>A                          |             |
| c.722-46delA                          |             |
| c.42T>C                               | p.=         |
| c.1060-2463A>G                        |             |
| c.1212-24T>C                          |             |
| c.1240+75A>G                          |             |
| c.607-59T>C                           |             |
| c.13659+18G>T                         |             |
| c.2503+37C>T                          |             |
| c.562C>T                              | p.Arg188Trp |
| c.656-54C>T                           |             |
| c.350-19A>T                           |             |
| c.282+96A>T                           |             |
| c.20G>T                               | p.Gly7Val   |
| c.*52A>G                              |             |
| c.4541+85T>A                          |             |
| c.275T>C                              | p.Leu92Pro  |
| c.713G>A                              | p.Arg238Gln |
| c.*83A>G                              |             |

VEP annotated somatic variants

|                       |             |
|-----------------------|-------------|
| c.1194+52G>A          |             |
| c.4359-72C>T          |             |
| c.597+75T>C           |             |
| c.68-57C>A            |             |
| c.-59G>C              |             |
|                       |             |
| c.-40C>T              |             |
| c.1074-9C>G           |             |
| c.221-9A>G            |             |
| c.-65-13C>G           |             |
| c.888A>G              | p.=         |
| c.-36C>T              |             |
| c.5-45T>C             |             |
| c.909G>A              | p.=         |
| c.46-28C>A            |             |
| c.2464+85G>A          |             |
| c.2193C>T             | p.=         |
| c.1547-43G>C          |             |
| c.1245T>A             | p.=         |
| c.728A>C              | p.Gln243Pro |
| c.2594C>T             | p.Pro865Leu |
| c.574G>A              | p.Ala192Thr |
| c.1746-53C>T          |             |
| c.945T>G              | p.=         |
| c.418-73A>G           |             |
| c.360-93_360-91delGGG |             |
| c.489-66T>C           |             |
| c.1011T>C             | p.=         |
| c.-36C>G              |             |
| c.490C>A              | p.Arg164Ser |
| c.1594+39T>C          |             |
| c.4136+31C>T          |             |
| c.429G>A              | p.=         |
| c.15661+81G>A         |             |
| c.15661+80G>A         |             |
| c.978C>T              | p.=         |
| c.4098+65G>A          |             |
| c.-4A>G               |             |
| c.1375-55T>C          |             |
| c.419G>C              | p.Cys140Ser |
| c.-282+72G>T          |             |
| c.3094+45C>G          |             |
| c.2092-75A>G          |             |
| c.*85dupT             |             |
| c.724-46G>A           |             |
| c.666G>A              | p.=         |
| c.1195-19C>T          |             |
| c.1704G>A             | p.=         |
| c.1190+78G>A          |             |
| c.1356C>T             | p.=         |
| c.343C>T              | p.Leu115Phe |
| c.1207-33A>T          |             |
| c.2241+96C>T          |             |
| c.1695-24T>C          |             |
| c.1142-88G>A          |             |



VEP annotated somatic variants

|                             |              |
|-----------------------------|--------------|
| c.124-30A>C                 |              |
| c.2401-73T>C                |              |
| c.414+28C>T                 |              |
| c.1924+89A>G                |              |
| c.194-34G>A                 |              |
| c.979+34C>T                 |              |
| c.691+693G>C                |              |
| c.460A>C                    | p.Lys154Gln  |
| c.937-61G>A                 |              |
| c.1418C>T                   | p.Thr473Ile  |
| c.115+9C>T                  |              |
| c.241-28C>T                 |              |
| c.20+141G>A                 |              |
| c.916T>G                    | p.Tyr306Asp  |
| c.1853A>G                   | p.His618Arg  |
| c.1526T>C                   | p.Val509Ala  |
| c.418-16T>C                 |              |
| c.-9+19G>A                  |              |
| c.238+18C>T                 |              |
| c.522+52G>A                 |              |
| c.226-5G>A                  |              |
| c.366+84_366+85delTT        |              |
| c.404+72C>T                 |              |
| c.6909G>A                   | p.=          |
| c.3144A>G                   | p.=          |
| c.3711+15G>T                |              |
| c.1515+27A>G                |              |
| c.3205-49G>A                |              |
| c.758+95_758+98delTGTG      |              |
| c.41011-10_41011-5dupTCTCCC |              |
| c.7599A>G                   | p.=          |
| c.-461G>C                   |              |
| c.*7027+91G>A               |              |
| c.7662T>C                   | p.=          |
| c.1013+88C>T                |              |
| c.7353T>C                   | p.=          |
| c.123C>T                    | p.=          |
| c.506-12delC                |              |
| c.3721G>A                   | p.Ala1241Thr |
| c.2322+46A>G                |              |
| c.1095G>A                   | p.=          |
| c.2044+93G>A                |              |
| c.3973-30A>G                |              |
| c.3485+25G>A                |              |
| c.3558C>T                   | p.=          |
| c.8225-53G>T                |              |
| c.3369-73T>C                |              |
| c.1354-88G>A                |              |
| c.2855-69A>G                |              |
| c.4240-1197T>A              |              |
| c.1936-77T>C                |              |
| c.-12T>C                    |              |
| c.1134C>T                   | p.=          |
| c.3300+70A>C                |              |
| c.1662-82G>C                |              |

VEP annotated somatic variants

|                          |             |
|--------------------------|-------------|
| c.2037+93T>A             |             |
| c.912G>A                 | p.=         |
| c.928G>A                 | p.Ala310Thr |
| c.190+21T>C              |             |
| c.4797+29T>A             |             |
| c.2768A>G                | p.His923Arg |
| c.2468+18C>T             |             |
| c.165+9T>C               |             |
| c.184+31G>A              |             |
| c.274C>T                 | p.Pro92Ser  |
| c.445-50C>T              |             |
| c.3684+88C>A             |             |
| c.1882-14T>A             |             |
| c.1675+48C>T             |             |
| c.6679+67C>T             |             |
| c.1290C>T                | p.=         |
| c.11077-94A>T            |             |
| c.1674+30T>G             |             |
| c.402+101A>G             |             |
| c.1062G>A                | p.=         |
| c.510T>C                 | p.=         |
| c.342+45C>G              |             |
| c.995A>C                 | p.Glu332Ala |
| c.1637+25G>T             |             |
| c.21+99C>A               |             |
| c.430-32A>G              |             |
| c.312T>C                 | p.=         |
| c.203-2816T>C            |             |
| c.2404+88C>A             |             |
| c.4951-65A>T             |             |
| c.773+84C>A              |             |
| c.637A>G                 | p.Arg213Gly |
| c.8049+84T>A             |             |
| c.272+68G>A              |             |
| c.1528+218G>A            |             |
| c.185G>C                 | p.Ser62Thr  |
| c.914-36C>G              |             |
| c.2783-41_2783-38delAAAA |             |
| c.3299+89T>C             |             |
| c.2955G>T                | p.=         |
| c.443-29G>A              |             |
| c.2330+27C>T             |             |
| c.1074-40A>G             |             |
| c.727+70C>T              |             |
| c.2200-46C>T             |             |
| c.*42C>G                 |             |
| c.940-142C>T             |             |
| c.894T>G                 | p.Asp298Glu |
| c.1820+93T>C             |             |
| c.5168-43T>C             |             |
| c.2587+74G>A             |             |
| c.3888T>C                | p.=         |
| c.433A>C                 | p.Ile145Leu |
| c.723C>G                 | p.Ser241Arg |

VEP annotated somatic variants

c.888+82\_888+83insTGATCCGCCTGCCTTGA  
c.-87C>G

|                           |             |
|---------------------------|-------------|
| c.3297+79G>A              |             |
| c.3705T>C                 | p.=         |
| c.1602-11G>T              |             |
| c.1413-21G>A              |             |
| c.703C>T                  | p.Arg235Cys |
| c.735-65C>T               |             |
| c.417T>A                  | p.=         |
| c.1083+59A>C              |             |
| c.6074+41G>A              |             |
| c.-44T>C                  |             |
| c.*59_*64delAAGTTA        |             |
| c.1057-81_1057-77delTTAGA |             |
| c.1395+10G>A              |             |
| c.2163-87G>A              |             |
| c.1836-38G>T              |             |
| c.197+37A>G               |             |
| c.1083-363A>G             |             |
| c.1083-242T>A             |             |
| c.1083-243A>G             |             |
| c.821-44A>G               |             |
| c.244-78T>C               |             |
| c.1884C>T                 | p.=         |
| c.*120C>T                 |             |
| c.143-23906G>A            |             |
| c.*61A>C                  |             |
| c.374G>A                  | p.Arg125Gln |
| c.546G>A                  | p.=         |
| c.43T>A                   | p.Phe15Ile  |
| c.657C>T                  | p.=         |
| c.570T>C                  | p.=         |
| c.895A>G                  | p.Ile299Val |
| c.759C>A                  | p.=         |
| c.630C>T                  | p.=         |
| c.-59A>G                  |             |
| c.259-95C>T               |             |
| c.489-5A>G                |             |
| c.855A>G                  | p.=         |
| c.1586-53_1586-52delAA    |             |
| c.551-51G>C               |             |
| c.1445_1447dupGCA         | p.Ser482dup |
| c.533A>C                  | p.Asn178Thr |
| c.714C>T                  | p.=         |
| c.685A>G                  | p.Lys229Glu |
| c.1294-34G>T              |             |
| c.250+12G>A               |             |
| c.57+11G>A                |             |
| c.1310+66G>T              |             |
| c.612G>C                  | p.=         |
| c.1640C>T                 | p.Ala547Val |
| c.1989+16T>A              |             |

VEP annotated somatic variants

|                                          |              |
|------------------------------------------|--------------|
| c.84G>T                                  | p.Arg28Ser   |
| c.726C>T                                 | p.=          |
| c.874-8C>G                               |              |
| c.389+83T>C                              |              |
| c.218T>C                                 | p.Ile73Thr   |
| c.2220+47T>C                             |              |
| c.3362G>T                                | p.Gly1121Val |
| c.11113-93G>T                            |              |
| c.532G>A                                 | p.Val178Ile  |
| c.8065-19G>A                             |              |
| c.67C>T                                  | p.Arg23Trp   |
| c.2205C>T                                | p.=          |
| c.252G>A                                 | p.=          |
| c.1365-66C>T                             |              |
| c.3252A>G                                | p.=          |
| c.3137+4A>G                              |              |
| c.228-65A>C                              |              |
| c.2107+49A>G                             |              |
| c.4625G>C                                | p.Ser1542Thr |
| c.207-79T>G                              |              |
| c.9G>A                                   | p.=          |
| c.1320T>C                                | p.=          |
| c.1303C>T                                | p.Leu435Phe  |
| c.*52T>C                                 |              |
| c.1154+56A>G                             |              |
| c.1090-75C>T                             |              |
| c.1553-92G>T                             |              |
| c.937-64G>C                              |              |
| c.1181G>A                                | p.Arg394Gln  |
| c.-38T>C                                 |              |
| c.789+6C>T                               |              |
| c.4829-87_4829-86insCATCCCATCAGAGATGAAGT |              |
| c.919-95delA                             |              |
| c.3771+20C>A                             |              |
| c.381C>A                                 | p.=          |
| c.*9A>G                                  |              |
| c.987-87A>G                              |              |
| c.2010T>C                                | p.=          |
| c.376A>G                                 | p.Asn126Asp  |
| c.2383-27T>C                             |              |
| c.614-89C>A                              |              |
| c.132C>A                                 | p.=          |
| c.102+39T>C                              |              |
| c.1170C>T                                | p.=          |
| n.161C>G                                 |              |
| c.8107+81T>A                             |              |
| c.2145+72A>G                             |              |
| c.110-92G>T                              |              |
| c.1223-46G>A                             |              |
| c.1008+56T>A                             |              |
| c.5036-26T>A                             |              |
| c.3398-28C>G                             |              |

VEP annotated somatic variants

c.6720+49dupT  
 c.5330C>T p.Thr1777Ile  
 c.194-92A>C  
 c.44-23A>G  
 c.1155-56T>C  
 c.4376A>G p.His1459Arg  
 c.789T>C p.=  
 c.\*10C>T  
 c.8664C>T p.=  
 c.13872T>C p.=  
 c.11538T>C p.=  
 c.829-85G>A  
 c.3183+9C>T  
 c.2088+4G>C  
 c.3933+335A>G  
 c.1294-57G>A  
 c.201+34\_201+47dupGTGGGGTCCCTGGC  
 c.1186+55C>T  
 c.1763-17C>A  
 c.-31-35\_-31-34insAACATAGTTTAAAAATTATAGTT  
 c.1469C>T p.Thr490Met  
 c.1218-48T>C  
 c.2121G>A p.=  
 c.15+26\_15+27delGG  
 c.122+84C>A  
 c.181-95A>T  
 c.874-24A>G  
 c.1530-61C>T  
 c.545A>C p.Lys182Thr  
 c.34C>G p.Pro12Ala  
 c.1431C>T p.=  
 c.477+17T>C  
 c.126\_131dupACCCGA p.Pro43\_Glu44dup  
 c.88-47C>G  
 c.342-64C>T  
 c.\*15G>C  
 c.1996-3594\_1996-3585dupTTTTGTTTTG  
 c.180-3C>T  
 c.744-38C>T  
 c.219+71T>A  
 c.241+36T>C  
 c.242-10A>T  
 c.242-9T>C  
 c.45+10T>C  
 c.2250+15A>G  
 c.366+45T>C  
 c.-47G>C  
 c.1261-51G>A  
 c.1743+29\_1743+33delTCTGG  
 c.552+275G>A  
 c.778-78G>T  
 c.545C>T p.Pro182Leu  
 c.392-972G>T  
 c.1301-73G>A  
 c.1901+85\_1901+92dupGTTTGTTT

VEP annotated somatic variants

|                           |            |
|---------------------------|------------|
| c.9236+97_9236+98delTT    |            |
| c.431-31C>T               |            |
| c.710-77C>T               |            |
| c.1243+38T>G              |            |
| c.796-3T>C                |            |
| c.792+72C>G               |            |
| c.-40A>G                  |            |
| c.210-68C>T               |            |
| c.1464+32A>G              |            |
| c.2313+39C>A              |            |
| c.86-13T>C                |            |
| c.3115-98A>C              |            |
| c.2415C>T                 | p.=        |
| c.782-97G>T               |            |
| c.3120+76T>C              |            |
| c.1646-55A>T              |            |
| c.3436-39A>G              |            |
| c.3435+15_3435+16dupGC    |            |
| c.50-88A>T                |            |
| c.-44T>C                  |            |
| c.337-11C>G               |            |
| c.56T>C                   | p.Val19Ala |
| c.-11C>T                  |            |
| c.180+38A>G               |            |
| c.649-87G>A               |            |
| c.1422C>T                 | p.=        |
| c.107+86_107+92dupTCCACGT |            |
| c.84+28T>G                |            |
| c.2175A>C                 | p.=        |
| c.1669-36C>T              |            |
| c.-137+75G>A              |            |
| c.1620+29G>T              |            |
| c.2232-36C>G              |            |
| c.691-11delC              |            |
| c.83G>A                   | p.Arg28His |
| c.2379A>C                 | p.=        |
| c.1854+29C>T              |            |
| c.2332-61C>T              |            |
| c.66+73G>C                |            |
| c.1560A>G                 | p.=        |
| c.163+67_163+72delGCCTTC  |            |
| c.916+60A>C               |            |
| c.32_39dupTAATCCCC        | p.Leu14Ter |
| c.-15A>G                  |            |
| c.1623A>G                 | p.=        |
| c.1459-57C>T              |            |
| c.441+10A>G               |            |
| c.-4G>A                   |            |
| c.1082+5A>G               |            |
| c.-85G>A                  |            |
| c.2331G>A                 | p.=        |
| c.688+22_688+23insAA      |            |
| c.-8C>T                   |            |
| c.128-61A>T               |            |
| c.123C>A                  | p.=        |

VEP annotated somatic variants

|                                            |              |
|--------------------------------------------|--------------|
| c.*75C>T                                   |              |
| c.866+46delT                               |              |
| c.842-73C>T                                |              |
| c.*37C>A                                   |              |
| c.1967-86A>G                               |              |
| c.1046-40C>T                               |              |
| c.1292C>A                                  | p.Thr431Asn  |
| c.1174+90G>A                               |              |
| c.1262+41G>C                               |              |
| c.1197-317G>A                              |              |
|                                            |              |
| n.4098+27T>G                               |              |
|                                            |              |
| c.864+22G>A                                |              |
| c.-37+2071G>T                              |              |
| c.438+26G>C                                |              |
| c.-9_-8insCC                               |              |
| c.-8_-7insACTTCCCTAAATGAGCAGGGATTTAGGAGTGG |              |
| c.111G>A                                   | p.=          |
| c.492G>A                                   | p.=          |
| c.1231-94T>C                               |              |
| c.2808+74C>T                               |              |
| c.2526C>T                                  | p.=          |
| c.213+30G>A                                |              |
| c.603G>A                                   | p.=          |
| c.582A>G                                   | p.=          |
| c.161-36T>G                                |              |
| c.1412T>C                                  | p.Val471Ala  |
| c.311-39C>T                                |              |
| c.2064G>C                                  | p.=          |
|                                            |              |
| c.1242-27G>A                               |              |
| c.3456C>T                                  | p.=          |
| c.270+27G>A                                |              |
| c.6384C>T                                  | p.=          |
| c.7615-29G>A                               |              |
| c.677-11T>A                                |              |
| c.4683+59A>T                               |              |
| c.172-57G>A                                |              |
| c.240-76C>G                                |              |
| c.916-100C>T                               |              |
| c.258+54T>G                                |              |
| c.5559T>C                                  | p.=          |
| c.4156-46C>T                               |              |
| c.478+18G>T                                |              |
| c.378G>A                                   | p.=          |
| c.1203-97G>A                               |              |
| c.161+76T>C                                |              |
| c.182A>G                                   | p.His61Arg   |
| c.1048-63C>T                               |              |
| c.2005-22C>T                               |              |
|                                            |              |
| c.1173+69G>A                               |              |
| c.3448T>C                                  | p.Trp1150Arg |

VEP annotated somatic variants

|                                   |             |
|-----------------------------------|-------------|
| c.4741+16T>A                      |             |
| c.1235-85G>C                      |             |
| c.450+111G>A                      |             |
| c.58C>T                           | p.Arg20Trp  |
| c.1546-402C>T                     |             |
| c.1467C>G                         | p.His489Gln |
| c.913+49C>T                       |             |
| c.1045-196_1045-194delGTC         |             |
| c.203+73T>C                       |             |
| c.266T>C                          | p.Val89Ala  |
| c.1684+23G>A                      |             |
| c.801+83C>T                       |             |
| c.730T>G                          | p.Tyr244Asp |
| c.529+15T>C                       |             |
| c.2288-100C>T                     |             |
| c.453+24A>G                       |             |
| c.113-42G>C                       |             |
| c.764-86C>G                       |             |
| c.1012-95G>A                      |             |
| c.918-52G>C                       |             |
| c.1-100C>G                        |             |
| c.3289+100G>A                     |             |
| c.1890+34G>A                      |             |
| c.1077+96T>A                      |             |
| c.111A>C                          | p.=         |
| c.2827-60G>A                      |             |
| c.-51C>T                          |             |
| c.1299-10_1299-9delTT             |             |
| c.1288+46T>C                      |             |
| c.1001-52G>C                      |             |
| c.1185+73G>A                      |             |
| c.1602A>G                         | p.=         |
| c.1156-65G>A                      |             |
| c.1078-4G>A                       |             |
| c.301-49G>A                       |             |
| c.2956G>A                         | p.Ala986Thr |
| c.427+92G>A                       |             |
| c.157-34_157-33insACTTTTGATATAGTT |             |
| c.1576+652G>C                     |             |
| c.2244-79A>G                      |             |
| c.650-20C>T                       |             |
| c.96G>A                           | p.=         |
| c.340A>G                          | p.Ile114Val |
| c.489+60G>T                       |             |
| c.611+30T>C                       |             |
| c.97T>C                           | p.Ser33Pro  |
| c.1170-30C>A                      |             |
| c.548+11C>T                       |             |
| c.285T>C                          | p.=         |
| c.1085+79C>A                      |             |
| c.495T>C                          | p.=         |
| c.70-88_70-87insGACAACATCAT       |             |
| c.324+33G>A                       |             |



VEP annotated somatic variants

|                             |              |
|-----------------------------|--------------|
| c.325-88G>A                 |              |
| c.1657-93C>T                |              |
| c.718-97T>C                 |              |
| c.1368+80delC               |              |
| c.1150+68C>T                |              |
| c.597+26C>T                 |              |
| c.349+15G>A                 |              |
| c.1238-86G>A                |              |
| c.1125+67A>G                |              |
| n.702-46A>G                 |              |
| c.883+67C>A                 |              |
| c.1656C>T                   | p.=          |
| c.1147+95G>A                |              |
| c.1767+29A>G                |              |
| c.1614+68A>G                |              |
| c.988-29C>A                 |              |
| c.-123-799C>A               |              |
|                             |              |
| c.913-38G>A                 |              |
| c.1146C>T                   | p.=          |
| c.144G>C                    | p.=          |
| c.725-21_725-13delCACTCTTCG |              |
| c.2329-36A>T                |              |
| c.957+76_957+77delTT        |              |
| c.1912-60G>A                |              |
| c.126G>A                    | p.=          |
| c.2089+79G>A                |              |
| c.813+8G>A                  |              |
| c.2671-85G>T                |              |
| c.2983-4G>A                 |              |
| c.567T>C                    | p.=          |
| c.1392C>T                   | p.=          |
| c.240C>A                    | p.=          |
| c.211+30G>A                 |              |
| c.7858+72A>G                |              |
| c.7166A>G                   | p.Glu2389Gly |
| c.598G>C                    | p.Val200Leu  |
| c.12G>A                     | p.=          |
| c.7149+86C>A                |              |
| c.4690-90G>T                |              |
| c.4603C>G                   | p.Pro1535Ala |
| n.12321G>T                  |              |
| n.9397-39C>T                |              |
| n.12765T>C                  |              |
| c.675-87delC                |              |
| c.*25G>A                    |              |
| c.187-86C>T                 |              |
| c.361+39T>C                 |              |
| c.612-263delG               |              |
| c.3705T>C                   | p.=          |
| c.203+75delC                |              |
| c.381C>T                    | p.=          |
| c.12962+56G>A               |              |
| c.465+86T>C                 |              |
| c.2130-32delG               |              |

VEP annotated somatic variants

|                                |             |
|--------------------------------|-------------|
| c.410+17T>C                    |             |
| c.654A>G                       | p.=         |
| c.-19G>T                       |             |
| c.535+25_535+28delATAT         |             |
| c.326-14T>G                    |             |
| c.1477-64A>G                   |             |
| c.3193+73G>C                   |             |
| c.610A>G                       | p.Ser204Gly |
| c.*43C>A                       |             |
| c.150+28C>G                    |             |
| c.163G>A                       | p.Val55Met  |
| c.2492+86G>A                   |             |
| c.458+51C>T                    |             |
| c.278-51A>G                    |             |
| c.241-68A>G                    |             |
| c.3381C>G                      | p.=         |
| n.1481-100A>T                  |             |
| c.399G>C                       | p.=         |
| c.6880-24T>C                   |             |
| c.2850C>T                      | p.=         |
| c.1697C>T                      | p.Pro566Leu |
| c.461G>C                       | p.Gly154Ala |
| c.1440G>A                      | p.=         |
| c.1604-90C>T                   |             |
| c.1541G>A                      | p.Gly514Glu |
| c.835+52A>G                    |             |
| c.478-67G>A                    |             |
| c.204C>T                       | p.=         |
| c.2260+939G>A                  |             |
| c.1967+35A>G                   |             |
| c.766G>A                       | p.Val256Ile |
| c.1961+59dupT                  |             |
| c.338C>T                       | p.Thr113Met |
| c.498+9G>A                     |             |
| c.2152A>G                      | p.Ile718Val |
| c.1640-88G>C                   |             |
| c.8-10C>T                      |             |
| c.203G>C                       | p.Gly68Ala  |
| c.1487T>C                      | p.Leu496Ser |
| c.60-90C>T                     |             |
| c.*82C>T                       |             |
| c.819C>T                       | p.=         |
| c.5391+71_5391+78delGTTTGTTT   |             |
| c.5109-94C>T                   |             |
| c.1215-42T>C                   |             |
| c.2274+74_2274+75insGACATGCCAC |             |
| c.786-94C>A                    |             |
| c.2951+37A>G                   |             |
| c.313-1G>A                     |             |
| c.633G>A                       | p.=         |
| c.427G>A                       | p.Ala143Thr |
| c.353+14C>T                    |             |
| c.385-77T>C                    |             |

VEP annotated somatic variants

|                                           |              |
|-------------------------------------------|--------------|
| c.589G>A                                  | p.Val197Ile  |
| c.777T>C                                  | p.=          |
| c.3273+29C>T                              |              |
| c.504-88delG                              |              |
| c.1734A>G                                 | p.=          |
| c.*1291T>C                                |              |
| c.672+83delC                              |              |
| c.3172-90A>T                              |              |
| c.3951+32G>A                              |              |
| c.1671C>T                                 | p.=          |
| c.*16G>C                                  |              |
| c.653+34A>G                               |              |
| c.1720+56G>A                              |              |
| c.-33C>T                                  |              |
| c.1689G>A                                 | p.=          |
| c.1260+54A>G                              |              |
| c.81+43T>A                                |              |
| c.2872A>G                                 | p.Thr958Ala  |
| c.2662+71C>G                              |              |
| c.1852+56G>C                              |              |
| c.2532C>T                                 | p.=          |
| c.6477+26delT                             |              |
| c.-167G>T                                 |              |
| c.16T>C                                   | p.Phe6Leu    |
| c.4573+55C>T                              |              |
| c.20G>A                                   | p.Arg7Gln    |
| c.541+17A>G                               |              |
| c.507+30C>G                               |              |
| c.229+87_229+100delGTTGACTATCATAG         |              |
| c.373T>C                                  | p.=          |
| c.*6G>A                                   |              |
| c.805+28A>C                               |              |
| c.276G>A                                  | p.=          |
| c.4818G>C                                 | p.=          |
| c.863+46C>T                               |              |
| c.1493G>A                                 | p.Ser498Asn  |
| c.1074C>G                                 | p.Asp358Glu  |
| c.3421A>C                                 | p.Lys1141Gln |
| c.3191+36T>C                              |              |
| c.108G>A                                  | p.=          |
| c.240+150_240+151insTTGGAAGTACCCAGGGTAGGG |              |
| c.312-85T>C                               |              |
| c.597A>G                                  | p.=          |
| c.210+8T>A                                |              |
| c.194+58G>A                               |              |
| c.150-89G>A                               |              |
| c.268-35A>G                               |              |
| c.2500T>A                                 | p.Cys834Ser  |
| c.-1168+65A>G                             |              |
| c.848-91C>T                               |              |
| c.919+76C>T                               |              |
| c.669+74G>A                               |              |
| c.761+14G>A                               |              |
| c.2035A>G                                 | p.Met679Val  |
| c.1306+4T>A                               |              |

VEP annotated somatic variants

|                                  |  |              |
|----------------------------------|--|--------------|
| c.823-58_823-57insAAAACACCTGTGTG |  |              |
| c.4398T>C                        |  | p.=          |
| c.52C>T                          |  | p.Pro18Ser   |
| c.1554A>G                        |  | p.=          |
| c.1389-17A>G                     |  |              |
| c.1409+71G>A                     |  |              |
| c.54+53A>G                       |  |              |
| c.1003G>T                        |  | p.Val335Leu  |
| c.123-49T>C                      |  |              |
| c.713-67C>T                      |  |              |
| c.965T>C                         |  | p.Met322Thr  |
| c.1439-37C>T                     |  |              |
| c.1716+61C>A                     |  |              |
| c.-142+746A>G                    |  |              |
| c.322G>A                         |  | p.Ala108Thr  |
| c.597+60A>G                      |  |              |
| c.1026G>A                        |  | p.=          |
| c.331-42T>C                      |  |              |
| c.1868G>C                        |  | p.Gly623Ala  |
| c.792+87C>A                      |  |              |
| c.994+71G>A                      |  |              |
| c.178G>A                         |  | p.Glu60Lys   |
| c.5199-47C>A                     |  |              |
| c.-25A>G                         |  |              |
| c.2333+80A>G                     |  |              |
| c.2874T>C                        |  | p.=          |
| c.6439-22A>G                     |  |              |
| c.750G>A                         |  | p.=          |
| c.603T>C                         |  | p.=          |
| c.1380+80A>G                     |  |              |
| c.*77A>G                         |  |              |
| c.4315+56G>A                     |  |              |
| c.597A>G                         |  | p.=          |
| c.859+76T>C                      |  |              |
| c.630+77G>C                      |  |              |
| c.1159+18C>A                     |  |              |
| c.1047-77A>G                     |  |              |
| c.602-72C>A                      |  |              |
| c.1503T>C                        |  | p.=          |
| c.*30C>T                         |  |              |
| c.340-14G>C                      |  |              |
| c.542-36C>T                      |  |              |
| n.2487C>T                        |  |              |
| c.864-72G>A                      |  |              |
| c.803+3A>C                       |  |              |
| c.3073+89C>T                     |  |              |
| c.4006G>A                        |  | p.Asp1336Asn |
| c.3211+8C>T                      |  |              |
| c.1151+93T>A                     |  |              |
| c.598+36G>C                      |  |              |
| c.957G>A                         |  | p.=          |
| c.563-36C>T                      |  |              |
| c.6875G>A                        |  | p.Arg2292His |
| c.1608A>G                        |  | p.=          |

VEP annotated somatic variants

|                            |                      |
|----------------------------|----------------------|
| c.1495_1496insAGCTCAGT     | p.Phe499Ter          |
| c.600G>T                   | p.=                  |
| c.401-100A>G               |                      |
| c.1566-79A>G               |                      |
| c.*71_*72insA              |                      |
| c.2500+95T>A               |                      |
| c.810-11C>T                |                      |
| c.2232-64T>C               |                      |
| c.2916-80C>A               |                      |
| c.1771-85T>A               |                      |
| c.1359+89G>A               |                      |
| c.1249G>A                  | p.Gly417Ser          |
| c.136+13C>G                |                      |
| c.669G>A                   | p.=                  |
| c.183-11A>G                |                      |
| c.646A>T                   | p.Arg216Trp          |
| c.456+79A>C                |                      |
| c.1974-88C>T               |                      |
| c.834G>A                   | p.=                  |
| c.2516-51C>T               |                      |
| c.2958G>A                  | p.=                  |
| c.3291+39C>T               |                      |
| c.3220-21T>G               |                      |
| c.1961-42C>T               |                      |
| c.1438-32C>T               |                      |
| c.48+74G>A                 |                      |
| c.2258-73T>C               |                      |
| c.6785_6802delTAAGGGAGGAGG | p.Val2262_Glu2267del |
| c.1491-86C>G               |                      |
| c.740+82G>A                |                      |
| c.421G>A                   | p.Ala141Thr          |
| c.1170A>G                  | p.=                  |
| c.32G>C                    | p.Cys11Ser           |
| c.823-20A>G                |                      |
| c.660+14G>A                |                      |
| c.2433+111G>C              |                      |
| c.2494C>T                  | p.=                  |
| c.1618-99T>A               |                      |
| c.*7G>A                    |                      |
| c.509-56C>G                |                      |
| c.792+39G>A                |                      |
| c.2679T>G                  | p.=                  |
| c.618A>G                   | p.=                  |
| c.1083-59G>A               |                      |
| c.1044+93C>A               |                      |
| c.1411-48T>C               |                      |
| c.171A>G                   | p.=                  |
| c.1296G>A                  | p.=                  |
| c.598+23T>G                |                      |
| c.787+31G>C                |                      |
| c.788-30T>C                |                      |
| c.-13C>T                   |                      |
| c.1562-43G>A               |                      |
| c.1459+67C>T               |                      |

VEP annotated somatic variants

|                  |              |
|------------------|--------------|
| c.621C>G         | p.=          |
| c.221A>T         | p.Asn74Ile   |
| c.618C>T         | p.=          |
| c.315+55G>A      |              |
| c.151-44A>G      |              |
| c.4634T>C        | p.Val1545Ala |
| c.532+98A>T      |              |
| c.*61A>C         |              |
| c.-40-21G>T      |              |
| c.1248-30T>C     |              |
| c.511-24C>T      |              |
| c.614+84G>A      |              |
| c.969C>T         | p.=          |
| c.362T>C         | p.Leu121Pro  |
| c.239-54C>T      |              |
| c.1130-1125G>A   |              |
| c.925+63T>C      |              |
| c.137-97G>T      |              |
| c.1356A>C        | p.=          |
| c.3+84T>G        |              |
| c.560-70A>T      |              |
| c.253+34T>C      |              |
| c.1969-26A>G     |              |
| c.2777G>A        | p.Ser926Asn  |
| c.1358C>A        | p.Ser453Tyr  |
| c.203C>T         | p.Thr68Ile   |
| c.-89_-88insACTT |              |
| c.80G>A          | p.Gly27Glu   |
| c.285C>T         | p.=          |
| c.337A>G         | p.Lys113Glu  |
| c.58-85G>A       |              |
| c.1434G>A        | p.=          |
| c.578T>G         | p.Val193Gly  |
| c.1251G>A        | p.=          |
| c.2598C>T        | p.=          |
| c.473C>T         | p.Thr158Ile  |
| c.406+2363T>A    |              |
| c.2111-46G>C     |              |
| c.5004-40G>A     |              |

VEP annotated somatic variants

| HGVSp_Short | Transcript_ID   | Exon_Number | t_depth |
|-------------|-----------------|-------------|---------|
|             | ENST00000356517 |             | 17      |
|             | ENST00000375234 |             | 16      |
|             | ENST00000393376 |             | 64      |
| p.Y261Y     | ENST00000269081 | 9/40        | 91      |
|             | ENST00000301732 | 33/33       | 28      |
|             | ENST00000284425 |             | 5       |
|             | ENST00000284425 |             | 28      |
|             | ENST00000340001 |             | 20      |
| p.S1346S    | ENST00000399410 | 28/31       | 113     |
|             | ENST00000205557 |             | 18      |
| p.R1273R    | ENST00000389817 | 31/39       | 180     |
|             | ENST00000289119 | 1/9         | 15      |
|             | ENST00000302538 |             | 34      |
|             | ENST00000436594 |             | 82      |
| p.A114T     | ENST00000600805 | 1/1         | 66      |
|             | ENST00000281182 |             | 28      |
|             | ENST00000420607 |             | 30      |
|             | ENST00000358776 |             | 46      |
|             | ENST00000366812 |             | 34      |
|             | ENST00000301452 | 1/6         | 25      |
|             | ENST00000256997 |             | 29      |
|             | ENST00000286353 |             | 66      |
|             | ENST00000258873 |             | 64      |
|             | ENST00000317447 |             | 24      |
|             | ENST00000399422 |             | 67      |
|             | ENST00000352511 |             | 82      |
| p.P769S     | ENST00000356955 | 20/23       | 94      |
|             | ENST00000310823 |             | 68      |
| p.L940M     | ENST00000373208 | 19/22       | 132     |
|             | ENST00000251582 |             | 58      |
|             | ENST00000389420 |             | 54      |
|             | ENST00000367996 |             | 157     |
|             | ENST00000381055 |             | 92      |
|             | ENST00000380548 |             | 85      |
|             | ENST00000367236 |             | 50      |
|             | ENST00000369716 |             | 30      |
| p.K207K     | ENST00000304129 | 7/19        | 176     |
|             | ENST00000395146 |             | 56      |
|             | ENST00000370460 |             | 27      |
|             | ENST00000397238 |             | 68      |
|             | ENST00000436302 |             | 24      |
| p.L191L     | ENST00000542281 | 4/4         | 71      |
|             | ENST00000367800 |             | 24      |
|             | ENST00000302312 |             | 54      |
| p.S16S      | ENST00000357847 | 1/6         | 40      |
|             | ENST00000527815 |             | 80      |
|             | ENST00000527815 |             | 150     |
| p.V96I      | ENST00000381129 | 3/6         | 86      |
| p.S196S     | ENST00000291582 | 5/14        | 227     |
|             | ENST00000291582 |             | 34      |
|             | ENST00000356239 |             | 28      |
|             | ENST00000356239 |             | 59      |
|             | ENST00000359579 |             | 51      |
|             | ENST00000295897 |             | 11      |

VEP annotated somatic variants

|          |                 |       |     |
|----------|-----------------|-------|-----|
|          | ENST00000293350 |       | 22  |
|          | ENST00000329841 |       | 65  |
|          | ENST00000374391 |       | 81  |
|          | ENST00000258888 | 1/14  | 70  |
|          | ENST00000258888 |       | 65  |
|          | ENST00000356289 |       | 12  |
|          | ENST00000356289 |       | 22  |
| p.P1447P | ENST00000341068 | 35/48 | 29  |
|          | ENST00000265709 |       | 83  |
|          | ENST00000520309 |       | 54  |
|          | ENST00000303941 |       | 29  |
|          | ENST00000357997 |       | 37  |
| p.F1009L | ENST00000290943 | 16/16 | 30  |
|          | ENST00000376087 |       | 30  |
|          | ENST00000399451 |       | 20  |
| p.Q268Q  | ENST00000355594 | 10/14 | 39  |
|          | ENST00000267116 |       | 28  |
|          | ENST00000341048 |       | 16  |
|          | ENST00000374700 |       | 20  |
|          | ENST00000595053 | 1/1   | 47  |
|          | ENST00000357586 |       | 48  |
|          | ENST00000359032 |       | 43  |
|          | ENST00000261842 |       | 24  |
| p.G356R  | ENST00000261842 | 9/21  | 52  |
|          | ENST00000376236 |       | 43  |
|          | ENST00000373173 |       | 29  |
| p.L28R   | ENST00000337801 | 1/4   | 90  |
|          | ENST00000337801 | 1/4   | 58  |
|          | ENST00000383168 |       | 23  |
| p.V640F  | ENST00000357872 | 12/20 | 46  |
|          | ENST00000256682 |       | 9   |
| p.M684V  | ENST00000336498 | 21/23 | 139 |
|          | ENST00000453547 |       | 27  |
|          | ENST00000276211 |       | 26  |
| p.E602E  | ENST00000370028 | 16/23 | 21  |
|          | ENST00000368194 |       | 70  |
|          | ENST00000378378 |       | 120 |
|          | ENST00000361247 |       | 4   |
| p.L367V  | ENST00000338458 | 11/13 | 78  |
| p.D181D  | ENST00000375741 | 6/20  | 47  |
|          | ENST00000378909 |       | 81  |
| p.G164G  | ENST00000377275 | 6/6   | 72  |
|          | ENST00000481646 |       | 31  |
|          | ENST00000423738 | 1/2   | 65  |
| p.R84G   | ENST00000423738 | 2/2   | 52  |
|          | ENST00000423738 |       | 59  |
| p.H2003H | ENST00000423738 | 2/2   | 27  |
|          | ENST00000412477 |       | 58  |
|          | ENST00000222250 |       | 84  |
|          | ENST00000222250 |       | 123 |
| p.W195C  | ENST00000216124 | 3/8   | 123 |
|          | ENST00000263207 |       | 74  |
|          | ENST00000420175 |       | 164 |
|          | ENST00000487349 |       | 20  |
|          | ENST00000325885 |       | 30  |



VEP annotated somatic variants

|               |                 |       |     |
|---------------|-----------------|-------|-----|
|               | ENST00000277458 | 1/6   | 28  |
|               | ENST00000347842 |       | 26  |
|               | ENST00000306729 |       | 71  |
|               | ENST00000342380 |       | 64  |
|               | ENST00000342380 |       | 59  |
|               | ENST00000361209 |       | 12  |
|               | ENST00000269197 |       | 77  |
|               | ENST00000284629 |       | 18  |
|               | ENST00000317868 |       | 32  |
|               | ENST00000358385 |       | 26  |
|               | ENST00000487903 | 30/30 | 47  |
| p.A335A       | ENST00000326735 | 11/29 | 151 |
| p.A753A       | ENST00000361216 | 16/23 | 68  |
|               | ENST00000368081 |       | 62  |
|               | ENST00000262429 |       | 56  |
|               | ENST00000356708 |       | 27  |
|               | ENST00000341514 |       | 27  |
|               | ENST00000536015 |       | 24  |
|               | ENST00000338821 |       | 101 |
|               | ENST00000338821 |       | 45  |
|               | ENST00000320211 |       | 26  |
|               | ENST00000395547 |       | 131 |
|               | ENST00000374521 |       | 20  |
|               | ENST00000276101 |       | 72  |
| p.I522L       | ENST00000367618 | 16/26 | 87  |
|               | ENST00000262320 |       | 40  |
| p.R328H       | ENST00000318683 | 3/3   | 246 |
|               | ENST00000321300 |       | 84  |
|               | ENST00000324385 |       | 3   |
| p.R386Q       | ENST00000542236 | 3/3   | 75  |
|               | ENST00000269980 | 1/9   | 29  |
|               | ENST00000223368 |       | 38  |
|               | ENST00000540052 |       | 18  |
|               | ENST00000449131 |       | 19  |
| p.X922_splice | ENST00000281474 |       | 29  |
|               | ENST00000224337 |       | 96  |
| p.N103S       | ENST00000252677 | 1/2   | 42  |
|               | ENST00000345382 |       | 30  |
|               | ENST00000170150 |       | 51  |
|               | ENST00000306378 |       | 52  |
|               | ENST00000471181 |       | 25  |
|               | ENST00000471181 |       | 48  |
|               | ENST00000471181 |       | 33  |
|               | ENST00000544455 |       | 50  |
|               | ENST00000467963 |       | 30  |
| p.Y288Y       | ENST00000333229 | 9/42  | 81  |
|               | ENST00000446293 |       | 52  |
|               | ENST00000333511 |       | 46  |
|               | ENST00000333511 |       | 63  |
|               | ENST00000260723 |       | 14  |
| p.G331D       | ENST00000260723 | 11/16 | 58  |
|               | ENST00000342818 |       | 22  |
|               | ENST00000256015 |       | 14  |
| p.T331T       | ENST00000327705 | 11/11 | 35  |
|               | ENST00000343736 |       | 58  |

VEP annotated somatic variants

|              |                 |       |     |
|--------------|-----------------|-------|-----|
|              | ENST00000441508 |       | 29  |
| p.D1424D     | ENST00000374144 | 3/3   | 102 |
|              | ENST00000284694 |       | 60  |
|              | ENST00000378615 |       | 24  |
| p.Q55R       | ENST00000261318 | 2/5   | 30  |
|              | ENST00000524981 |       | 47  |
| p.M184Dfs*14 | ENST00000330828 | 2/2   | 58  |
|              | ENST00000399910 |       | 14  |
|              | ENST00000381365 |       | 55  |
|              | ENST00000319977 | 10/10 | 64  |
| p.H371R      | ENST00000590083 | 9/9   | 76  |
|              | ENST00000301246 | 1/4   | 138 |
| p.D131E      | ENST00000304661 | 2/2   | 74  |
| p.T578T      | ENST00000366534 | 11/22 | 90  |
|              | ENST00000371007 |       | 51  |
|              | ENST00000343433 |       | 32  |
|              | ENST00000326665 |       | 61  |
|              | ENST00000339142 |       | 28  |
|              | ENST00000388934 | 5/5   | 40  |
|              | ENST00000290390 |       | 15  |
|              | ENST00000245907 |       | 22  |
|              | ENST00000398965 |       | 25  |
|              | ENST00000223642 |       | 64  |
|              | ENST00000223642 |       | 36  |
|              | ENST00000380175 | 1/6   | 99  |
|              | ENST00000313164 |       | 24  |
|              | ENST00000451037 |       | 37  |
| p.F215F      | ENST00000309893 | 6/7   | 113 |
| p.L816F      | ENST00000398319 | 17/37 | 68  |
|              | ENST00000360228 |       | 21  |
|              | ENST00000371372 |       | 56  |
|              | ENST00000347598 |       | 17  |
|              | ENST00000479441 |       | 16  |
|              | ENST00000479441 |       | 165 |
|              | ENST00000324631 |       | 73  |
|              | ENST00000502583 |       | 45  |
|              | ENST00000361675 |       | 35  |
|              | ENST00000316448 | 1/9   | 19  |
|              | ENST00000378847 | 11/11 | 27  |
|              | ENST00000342666 |       | 33  |
|              | ENST00000378494 |       | 41  |
| p.C283C      | ENST00000446248 | 8/19  | 117 |
|              | ENST00000398776 |       | 19  |
|              | ENST00000271971 |       | 14  |
|              | ENST00000222125 |       | 65  |
|              | ENST00000403299 |       | 16  |
|              | ENST00000391898 |       | 136 |
|              | ENST00000427043 | 7/7   | 49  |
|              | ENST00000368078 |       | 18  |
|              | ENST00000377022 |       | 17  |
|              | ENST00000409235 |       | 66  |
| p.L9L        | ENST00000343849 | 1/2   | 104 |
| p.Q431Q      | ENST00000258214 | 7/9   | 153 |
|              | ENST00000349456 |       | 26  |
| p.V245M      | ENST00000292574 | 3/7   | 35  |

VEP annotated somatic variants

|                |                 |       |     |
|----------------|-----------------|-------|-----|
|                | ENST00000398545 |       | 25  |
|                | ENST00000422185 | 11/11 | 26  |
|                | ENST00000305866 | 28/28 | 29  |
|                | ENST00000329214 |       | 30  |
| p.K190K        | ENST00000369704 | 4/18  | 33  |
| p.E675V        | ENST00000388914 | 13/24 | 28  |
|                | ENST00000511166 |       | 58  |
|                | ENST00000370276 |       | 24  |
| p.C52C         | ENST00000392343 | 3/15  | 202 |
|                | ENST00000263102 |       | 29  |
|                | ENST00000445632 |       | 39  |
|                | ENST00000311925 |       | 11  |
|                | ENST00000292301 |       | 109 |
| p.N797S        | ENST00000287097 | 21/33 | 67  |
| p.H203Pfs*5    | ENST00000398214 | 4/6   | 91  |
|                | ENST00000368033 |       | 72  |
|                | ENST00000360141 |       | 33  |
| p.K259T        | ENST00000309424 | 3/3   | 120 |
|                | ENST00000322875 |       | 33  |
| p.D172_P180del | ENST00000312648 | 3/4   | 45  |
|                | ENST00000394886 |       | 22  |
|                | ENST00000342711 |       | 138 |
|                | ENST00000437685 |       | 73  |
| p.Q525R        | ENST00000296129 | 6/9   | 98  |
|                | ENST00000507958 |       | 22  |
|                | ENST00000368911 |       | 63  |
|                | ENST00000425876 |       | 95  |
|                | ENST00000256443 |       | 27  |
| p.P409P        | ENST00000274695 | 12/16 | 123 |
|                | ENST00000379989 |       | 27  |
|                | ENST00000460006 |       | 106 |
|                | ENST00000376288 |       | 80  |
|                | ENST00000376288 | 1/2   | 77  |
|                | ENST00000401445 |       | 14  |
|                | ENST00000357396 |       | 33  |
|                | ENST00000399839 |       | 22  |
|                | ENST00000262608 |       | 17  |
| p.R252H        | ENST00000262608 | 7/18  | 78  |
|                | ENST00000336737 |       | 50  |
| p.R184R        | ENST00000331437 | 1/1   | 39  |
|                | ENST00000372927 |       | 33  |
| p.R28L         | ENST00000368328 | 1/3   | 62  |
|                | ENST00000397527 |       | 19  |
|                | ENST00000397527 |       | 30  |
|                | ENST00000337090 |       | 40  |
|                | ENST00000337090 |       | 19  |
| p.S135N        | ENST00000264982 | 6/18  | 47  |
|                | ENST00000556440 |       | 26  |
|                | ENST00000372838 |       | 23  |
|                | ENST00000317091 |       | 15  |
| p.H402Y        | ENST00000367429 | 9/22  | 62  |
| p.Q1463Q       | ENST00000003084 | 27/27 | 73  |
|                | ENST00000597853 | 3/5   | 78  |
| p.A13A         | ENST00000369258 | 1/23  | 37  |
|                | ENST00000432561 |       | 24  |

VEP annotated somatic variants

|               |                 |       |     |
|---------------|-----------------|-------|-----|
|               | ENST00000432561 |       | 84  |
| p.A182V       | ENST00000445067 | 8/13  | 71  |
|               | ENST00000306071 | 11/11 | 42  |
|               | ENST00000306243 | 1/1   | 134 |
|               | ENST00000324288 |       | 91  |
| p.S211S       | ENST00000536961 | 5/5   | 40  |
|               | ENST00000392521 |       | 152 |
| p.H122Q       | ENST00000453707 | 5/5   | 68  |
|               | ENST00000424301 |       | 45  |
|               | ENST00000346436 |       | 29  |
|               | ENST00000331433 |       | 52  |
|               | ENST00000401528 | 6/6   | 26  |
|               | ENST00000299663 | 1/6   | 27  |
|               | ENST00000369449 | 6/6   | 26  |
| p.X103_splice | ENST00000374379 |       | 21  |
|               | ENST00000540338 |       | 34  |
|               | ENST00000320081 |       | 39  |
|               | ENST00000379510 |       | 4   |
|               | ENST00000356713 |       | 45  |
| p.Y1572Y      | ENST00000317147 | 34/49 | 67  |
|               | ENST00000289382 |       | 18  |
| p.T453T       | ENST00000537554 | 2/2   | 148 |
|               | ENST00000397461 |       | 20  |
|               | ENST00000361727 |       | 35  |
|               | ENST00000361727 |       | 67  |
|               | ENST00000373855 |       | 28  |
| p.E1175E      | ENST00000265136 | 12/13 | 55  |
|               | ENST00000323786 |       | 36  |
|               | ENST00000297135 |       | 49  |
|               | ENST00000353479 |       | 7   |
|               | ENST00000390654 |       | 70  |
|               | ENST00000370571 |       | 41  |
|               | ENST00000370571 |       | 26  |
| p.A414T       | ENST00000313669 | 14/14 | 80  |
|               | ENST00000372216 |       | 37  |
|               | ENST00000264828 |       | 28  |
|               | ENST00000361866 |       | 127 |
|               | ENST00000295550 |       | 37  |
| p.L136L       | ENST00000361682 | 4/6   | 120 |
|               | ENST00000411948 |       | 55  |
|               | ENST00000264613 |       | 4   |
|               | ENST00000568128 |       | 28  |
|               | ENST00000265085 | 10/10 | 20  |
| p.I1052V      | ENST00000367057 | 18/20 | 50  |
|               | ENST00000373631 |       | 23  |
|               | ENST00000348438 |       | 47  |
|               | ENST00000280527 |       | 17  |
|               | ENST00000280527 |       | 126 |
| p.A259A       | ENST00000433368 | 8/8   | 65  |
|               | ENST00000377340 |       | 14  |
|               | ENST00000268184 |       | 44  |
|               | ENST00000182096 |       | 19  |
|               | ENST00000419587 | 1/4   | 44  |
|               | ENST00000370287 | 3/5   | 17  |
|               | ENST00000217244 |       | 19  |

VEP annotated somatic variants

|                 |                 |                 |      |     |
|-----------------|-----------------|-----------------|------|-----|
| p.P1304P        | ENST00000308508 | 4/10            | 38   |     |
|                 | ENST00000423479 |                 | 43   |     |
| p.P1496P        | ENST00000598234 | 31/50           | 53   |     |
|                 | ENST00000433211 |                 | 81   |     |
| p.V141V         | ENST00000325551 | 3/19            | 100  |     |
| p.L637L         | ENST00000377833 | 15/67           | 64   |     |
|                 | ENST00000537177 |                 | 25   |     |
| p.L1572P        | ENST00000535468 | 24/26           | 92   |     |
|                 | ENST00000360264 |                 | 44   |     |
| p.G978R         | ENST00000360264 | 18/24           | 32   |     |
|                 | ENST00000410053 |                 | 67   |     |
| p.A801A         | ENST00000410053 | 20/20           | 89   |     |
| p.H443Y         | ENST00000282251 | 8/18            | 58   |     |
|                 | ENST00000373691 | 2/2             | 19   |     |
|                 | ENST00000426130 |                 | 28   |     |
|                 | ENST00000533558 |                 | 23   |     |
|                 | ENST00000330436 |                 | 20   |     |
|                 | ENST00000330436 |                 | 43   |     |
|                 | ENST00000336411 |                 | 7    |     |
|                 | p.P13L          | ENST00000550308 | 2/13 | 5   |
|                 |                 | ENST00000003100 |      | 41  |
|                 | p.P21P          | ENST00000257215 | 2/20 | 110 |
| ENST00000264161 |                 |                 | 58   |     |
| ENST00000260803 |                 |                 | 47   |     |
| p.H78H          | ENST00000254337 |                 | 27   |     |
|                 | ENST00000254337 | 3/13            | 121  |     |
|                 | ENST00000442544 |                 | 38   |     |
| p.V339V         | ENST00000378454 | 8/10            | 56   |     |
|                 | ENST00000339452 | 1/8             | 95   |     |
| p.V116V         | ENST00000357067 | 4/6             | 20   |     |
|                 | ENST00000407793 |                 | 61   |     |
|                 | ENST00000407793 |                 | 15   |     |
|                 | ENST00000331314 |                 | 25   |     |
|                 | ENST00000373624 |                 | 17   |     |
| p.E224Q         | ENST00000373624 |                 | 21   |     |
|                 | ENST00000328194 | 4/23            | 68   |     |
|                 | ENST00000265036 |                 | 134  |     |
|                 | ENST00000263196 |                 | 55   |     |
|                 | ENST00000403951 |                 | 42   |     |
|                 | ENST00000376223 |                 | 128  |     |
|                 | ENST00000284690 |                 | 83   |     |
|                 | ENST00000308736 |                 | 66   |     |
|                 | ENST00000262415 |                 | 63   |     |
|                 | ENST00000262415 |                 | 21   |     |
|                 | ENST00000262415 |                 | 111  |     |
|                 | ENST00000398557 |                 | 54   |     |
|                 | ENST00000301180 |                 | 52   |     |
|                 | ENST00000319212 | 17/17           | 17   |     |
|                 | ENST00000366636 | 10/10           | 27   |     |
|                 | ENST00000366633 |                 | 55   |     |
|                 | ENST00000220812 |                 | 40   |     |
| ENST00000376104 |                 | 28              |      |     |
| ENST00000374360 |                 | 60              |      |     |
| ENST00000372391 |                 | 65              |      |     |
| ENST00000357338 |                 | 20              |      |     |

VEP annotated somatic variants

|          |                 |       |     |
|----------|-----------------|-------|-----|
|          | ENST00000339686 |       | 18  |
|          | ENST00000399180 |       | 28  |
|          | ENST00000328843 |       | 30  |
|          | ENST00000351747 |       | 46  |
|          | ENST00000430092 |       | 37  |
|          | ENST00000430092 |       | 29  |
|          | ENST00000430092 |       | 21  |
|          | ENST00000430092 |       | 59  |
|          | ENST00000430092 |       | 37  |
|          | ENST00000389840 |       | 18  |
|          | ENST00000359357 |       | 10  |
|          | ENST00000262442 |       | 15  |
|          | ENST00000296218 |       | 66  |
|          | ENST00000370665 |       | 84  |
|          | ENST00000324109 |       | 25  |
|          | ENST00000256935 |       | 71  |
|          | ENST00000266037 |       | 18  |
| p.P1146P | ENST00000398665 | 25/28 | 163 |
| p.E351Q  | ENST00000393092 | 10/11 | 133 |
|          | ENST00000355526 |       | 68  |
|          | ENST00000370109 |       | 25  |
|          | ENST00000324472 |       | 34  |
|          | ENST00000294485 |       | 48  |
|          | ENST00000395209 |       | 30  |
|          | ENST00000395209 |       | 44  |
|          | ENST00000395209 |       | 47  |
|          | ENST00000321322 |       | 40  |
|          | ENST00000257189 |       | 25  |
| p.P1041P | ENST00000359747 | 15/15 | 63  |
| p.C10C   | ENST00000359747 | 1/15  | 110 |
|          | ENST00000379802 |       | 55  |
|          | ENST00000244364 |       | 24  |
|          | ENST00000310850 |       | 58  |
|          | ENST00000344537 |       | 86  |
|          | ENST00000510708 |       | 44  |
| p.R93R   | ENST00000324432 | 5/12  | 73  |
|          | ENST00000334679 | 2/2   | 25  |
| p.S144A  | ENST00000279488 | 2/3   | 110 |
|          | ENST00000324972 |       | 24  |
|          | ENST00000398093 |       | 16  |
|          | ENST00000431635 | 1/10  | 28  |
| p.R26L   | ENST00000495186 | 2/5   | 29  |
| p.T341I  | ENST00000374893 | 9/19  | 101 |
|          | ENST00000304546 |       | 67  |
|          | ENST00000392692 |       | 30  |
|          | ENST00000423192 |       | 26  |
|          | ENST00000318130 |       | 28  |
|          | ENST00000379375 |       | 67  |
|          | ENST00000377211 |       | 23  |
|          | ENST00000322349 |       | 22  |
|          | ENST00000217182 |       | 45  |
|          | ENST00000379715 |       | 4   |
|          | ENST00000331493 |       | 64  |
|          | ENST00000450662 |       | 68  |
|          | ENST00000440314 |       | 27  |

VEP annotated somatic variants

|          |                 |       |      |    |
|----------|-----------------|-------|------|----|
| p.R124R  | ENST00000295824 | 1/13  | 91   |    |
|          | ENST00000268206 |       | 30   |    |
|          | ENST00000426333 |       | 62   |    |
| p.H33H   | ENST00000253039 | 2/12  | 39   |    |
| p.T503T  | ENST00000308167 | 9/9   | 29   |    |
| p.I139I  | ENST00000402918 | 3/3   | 160  |    |
| p.I503I  | ENST00000402918 | 3/3   | 153  |    |
| p.F406F  | ENST00000402918 | 3/3   | 258  |    |
|          | ENST00000252034 |       | 13   |    |
|          | ENST00000354666 |       | 26   |    |
| p.S345T  | ENST00000477853 | 10/23 | 73   |    |
|          | ENST00000220853 |       | 29   |    |
|          | ENST00000220853 |       | 20   |    |
| p.S575P  | ENST00000334192 | 16/23 | 56   |    |
|          | ENST00000334192 |       | 36   |    |
|          | ENST00000334192 |       | 36   |    |
| p.A163A  | ENST00000295206 | 1/2   | 61   |    |
|          | ENST00000373203 |       | 113  |    |
|          | ENST00000261488 |       | 27   |    |
|          | ENST00000371207 |       | 52   |    |
|          | ENST00000334696 |       | 24   |    |
|          | ENST00000389561 |       | 21   |    |
| p.H139R  | ENST00000392957 | 4/9   | 35   |    |
|          | ENST00000366837 |       | 124  |    |
| p.S412S  | ENST00000521400 | 13/19 | 27   |    |
|          | ENST00000433197 |       | 51   |    |
|          | ENST00000257934 |       | 76   |    |
|          | ENST00000389567 |       | 45   |    |
| p.G590R  | ENST00000557943 | 6/12  | 56   |    |
| p.T171I  | ENST00000354232 | 4/5   | 127  |    |
| p.T245M  | ENST00000292147 | 1/7   | 42   |    |
| p.A2A    | ENST00000370331 |       | 26   |    |
|          | ENST00000538904 |       | 20   |    |
|          | ENST00000538904 |       | 49   |    |
|          | ENST00000301607 |       | 65   |    |
|          | ENST00000301607 |       | 223  |    |
| p.S1050S | ENST00000409018 | 22/22 | 9    |    |
| p.E589K  | ENST00000366548 | 13/16 | 117  |    |
|          | ENST00000381295 |       | 21   |    |
|          | ENST00000367075 |       | 15   |    |
| p.D1260E | ENST00000360256 | 14/26 | 37   |    |
|          | ENST00000360256 |       | 45   |    |
| p.V374I  | ENST00000218099 | 8/8   | 33   |    |
|          | ENST00000374900 |       | 17   |    |
|          | ENST00000278840 |       | 49   |    |
|          | ENST00000278829 |       | 46   |    |
|          | ENST00000407106 |       | 65   |    |
|          | ENST00000216214 |       | 7/10 | 64 |
| p.R239H  | ENST00000370784 | 7/10  | 11   |    |
|          | ENST00000370784 |       | 11   |    |
|          | ENST00000391440 |       | 1/1  | 61 |
|          | ENST00000391440 |       | 1/1  | 27 |
|          | ENST00000395297 |       | 46   |    |
| p.L116L  | ENST00000368557 | 3/4   | 78   |    |
|          | ENST00000356467 |       | 72   |    |

VEP annotated somatic variants

|              |                 |       |     |
|--------------|-----------------|-------|-----|
|              | ENST00000329203 | 1/1   | 49  |
|              | ENST00000265018 |       | 40  |
|              | ENST00000327337 |       | 26  |
|              | ENST00000324675 |       | 9   |
|              | ENST00000361361 |       | 62  |
|              | ENST00000374362 | 1/30  | 33  |
|              | ENST00000361738 |       | 82  |
| p.A1000A     | ENST00000259698 | 21/23 | 50  |
| p.A187V      | ENST00000283357 | 5/10  | 47  |
|              | ENST00000389301 |       | 29  |
|              | ENST00000229769 |       | 27  |
|              | ENST00000229769 |       | 64  |
| p.P129P      | ENST00000229769 | 2/10  | 73  |
|              | ENST00000536681 | 12/12 | 37  |
|              | ENST00000264042 |       | 58  |
|              | ENST00000264042 |       | 159 |
| p.G1217G     | ENST00000306749 | 22/43 | 81  |
|              | ENST00000306749 |       | 26  |
|              | ENST00000306749 |       | 57  |
|              | ENST00000306749 |       | 28  |
| p.P155L      | ENST00000404922 | 2/18  | 126 |
| p.H1966D     | ENST00000600128 | 47/64 | 90  |
|              | ENST00000434748 |       | 35  |
|              | ENST00000478939 | 3/3   | 98  |
|              | ENST00000432825 |       | 41  |
|              | ENST00000432825 |       | 26  |
|              | ENST00000292852 |       | 12  |
|              | ENST00000296438 |       | 10  |
|              | ENST00000331272 |       | 18  |
|              | ENST00000324852 |       | 36  |
| p.A384A      | ENST00000594202 | 16/29 | 85  |
| p.G388R      | ENST00000292408 | 9/18  | 106 |
|              | ENST00000336098 | 9/9   | 82  |
|              | ENST00000257209 |       | 98  |
| p.N984N      | ENST00000257209 | 17/25 | 115 |
|              | ENST00000257209 |       | 58  |
|              | ENST00000333129 |       | 64  |
|              | ENST00000337488 |       | 17  |
| p.L198L      | ENST00000252037 | 6/9   | 26  |
|              | ENST00000424785 |       | 63  |
| p.T429M      | ENST00000369850 | 9/48  | 30  |
|              | ENST00000490882 |       | 71  |
|              | ENST00000261937 |       | 109 |
|              | ENST00000319653 |       | 8   |
|              | ENST00000319653 |       | 70  |
| p.S147S      | ENST00000367755 | 4/9   | 59  |
| p.T58_T59del | ENST00000263773 | 1/17  | 30  |
|              | ENST00000263773 |       | 33  |
|              | ENST00000297267 |       | 45  |
| p.A697A      | ENST00000297267 | 11/23 | 252 |
| p.Y428Y      | ENST00000259806 | 2/2   | 104 |
|              | ENST00000373060 |       | 25  |
|              | ENST00000373247 | 15/15 | 20  |
| p.H649H      | ENST00000264895 | 17/74 | 63  |
|              | ENST00000264895 |       | 10  |



VEP annotated somatic variants

|                 |                 |                 |                 |       |     |
|-----------------|-----------------|-----------------|-----------------|-------|-----|
| p.D2813D        | ENST00000264895 | 56/74           | 14              |       |     |
|                 | ENST00000264895 |                 | 51              |       |     |
|                 | ENST00000264895 |                 | 29              |       |     |
| p.I1329I        | ENST00000329798 | 1/8             | 147             |       |     |
|                 | ENST00000357447 |                 | 63              |       |     |
|                 | ENST00000350221 |                 | 17              |       |     |
| p.H529H         | ENST00000306100 | 18/19           | 60              |       |     |
|                 | ENST00000319725 |                 | 127             |       |     |
|                 | ENST00000310160 |                 | 47              |       |     |
|                 | ENST00000318336 |                 | 3/3             | 89    |     |
|                 | ENST00000292079 |                 | 175             |       |     |
|                 | ENST00000296137 |                 | 19              |       |     |
|                 | ENST00000282538 |                 | 18              |       |     |
|                 | ENST00000314167 |                 | 35              |       |     |
|                 | ENST00000314167 |                 | 24              |       |     |
|                 | ENST00000261304 |                 | 44              |       |     |
|                 | ENST00000261304 |                 | 85              |       |     |
|                 | ENST00000588479 |                 | 143             |       |     |
|                 | ENST00000297107 |                 | 94              |       |     |
|                 | p.Q474K         |                 | ENST00000324589 | 15/16 | 152 |
|                 | p.Y53D          |                 | ENST00000252318 | 1/11  | 40  |
| p.V515F         | ENST00000252318 | 9/11            | 101             |       |     |
| p.E352E         | ENST00000269209 | 4/6             | 164             |       |     |
| p.A490V         | ENST00000269209 | 4/6             | 109             |       |     |
|                 | ENST00000269209 | 6/6             | 56              |       |     |
| p.P220P         | ENST00000373387 | 1/28            | 8               |       |     |
|                 | ENST00000343435 |                 | 23              |       |     |
|                 | ENST00000343435 |                 | 35              |       |     |
|                 | ENST00000343435 | 7/12            | 79              |       |     |
|                 | p.F365F         | ENST00000400723 | 12/14           | 141   |     |
|                 |                 | ENST00000379597 |                 | 71    |     |
|                 |                 | ENST00000238018 |                 | 67    |     |
|                 |                 | ENST00000342560 |                 | 41    |     |
|                 |                 | ENST00000249598 |                 | 37    |     |
|                 |                 | ENST00000308317 |                 | 29    |     |
| ENST00000486715 |                 | 47              |                 |       |     |
| ENST00000233838 |                 | 45              |                 |       |     |
| p.A480P         | ENST00000334928 | 3/4             | 38              |       |     |
| p.A517V         | ENST00000334928 | 3/4             | 144             |       |     |
| p.R469C         | ENST00000301671 | 9/9             | 33              |       |     |
|                 | ENST00000367419 |                 | 30              |       |     |
| p.V97I          | ENST00000262460 | 4/7             | 82              |       |     |
| p.C884C         | ENST00000205061 | 19/27           | 68              |       |     |
|                 | ENST00000205061 |                 | 117             |       |     |
|                 | ENST00000262366 |                 | 25              |       |     |
|                 | ENST00000373365 | 1/6             | 83              |       |     |
| p.I85V          | ENST00000372617 | 3/9             | 41              |       |     |
|                 | ENST00000372617 |                 | 132             |       |     |
|                 | ENST00000360814 |                 | 31              |       |     |
|                 | ENST00000287275 |                 | 36              |       |     |
|                 | ENST00000282570 |                 | 56              |       |     |
| p.D103D         | ENST00000248996 | 2/3             | 292             |       |     |
| p.R37H          | ENST00000329517 | 3/8             | 51              |       |     |
| p.S151S         | ENST00000226413 | 1/3             | 72              |       |     |
| p.L1014L        | ENST00000204726 | 15/24           | 153             |       |     |

VEP annotated somatic variants

|         |                 |       |     |
|---------|-----------------|-------|-----|
|         | ENST00000329125 | 2/2   | 38  |
| p.T416T | ENST00000377047 | 7/9   | 83  |
|         | ENST00000230036 |       | 82  |
|         | ENST00000316715 |       | 17  |
| p.R7R   | ENST00000264718 | 1/14  | 25  |
| p.V124L | ENST00000298110 | 1/1   | 63  |
| p.A218P | ENST00000607359 | 3/16  | 81  |
|         | ENST00000392607 | 2/7   | 16  |
|         | ENST00000392607 |       | 136 |
|         | ENST00000392607 |       | 36  |
|         | ENST00000561100 |       | 29  |
| p.H475H | ENST00000529750 | 13/20 | 89  |
|         | ENST00000358160 |       | 25  |
|         | ENST00000406902 |       | 11  |
|         | ENST00000406902 |       | 13  |
|         | ENST00000406902 |       | 69  |
|         | ENST00000381486 |       | 15  |
|         | ENST00000518783 |       | 23  |
|         | ENST00000296526 |       | 23  |
|         | ENST00000264357 |       | 32  |
| p.L597L | ENST00000357716 | 8/10  | 119 |
|         | ENST00000253458 |       | 26  |
| p.T616M | ENST00000373818 | 13/17 | 101 |
|         | ENST00000340438 | 1/1   | 28  |
|         | ENST00000398606 |       | 203 |
|         | ENST00000216465 |       | 101 |
|         | ENST00000360803 |       | 18  |
|         | ENST00000360803 | 17/17 | 42  |
|         | ENST00000218006 |       | 41  |
|         | ENST00000389617 | 7/7   | 122 |
|         | ENST00000261208 |       | 59  |
|         | ENST00000598398 |       | 11  |
|         | ENST00000080059 |       | 39  |
|         | ENST00000080059 |       | 111 |
|         | ENST00000441542 |       | 23  |
|         | ENST00000398153 |       | 79  |
| p.P175P | ENST00000424830 | 4/5   | 27  |
|         | ENST00000366582 |       | 115 |
|         | ENST00000366582 |       | 36  |
| p.T614T | ENST00000366582 | 15/45 | 59  |
| p.V632A | ENST00000297440 | 9/13  | 178 |
|         | ENST00000399332 |       | 8   |
|         | ENST00000399332 |       | 21  |
|         | ENST00000348459 |       | 22  |
|         | ENST00000348459 |       | 119 |
|         | ENST00000232854 |       | 84  |
|         | ENST00000443617 |       | 9   |
| p.H63D  | ENST00000357618 | 2/6   | 82  |
| p.E336E | ENST00000222390 | 8/18  | 74  |
|         | ENST00000441594 |       | 105 |
|         | ENST00000330710 |       | 75  |
| p.D13D  | ENST00000253410 | 1/3   | 70  |
|         | ENST00000304043 |       | 14  |
|         | ENST00000359985 | 1/1   | 44  |
|         | ENST00000377831 |       | 25  |

VEP annotated somatic variants

|                 |                 |       |     |
|-----------------|-----------------|-------|-----|
| p.A16A          | ENST00000377364 | 1/1   | 101 |
|                 | ENST00000354624 |       | 22  |
| p.L207M         | ENST00000418931 | 3/6   | 92  |
|                 | ENST00000399120 |       | 58  |
|                 | ENST00000310053 |       | 39  |
| p.V202V         | ENST00000278715 | 9/14  | 78  |
|                 | ENST00000216106 |       | 32  |
| p.G165V         | ENST00000216106 | 5/11  | 35  |
|                 | ENST00000257555 |       | 38  |
|                 | ENST00000392006 |       | 49  |
| p.L462L         | ENST00000397668 | 15/23 | 46  |
|                 | ENST00000262626 |       | 133 |
| p.G172G         | ENST00000299238 | 1/1   | 122 |
|                 | ENST00000592984 |       | 13  |
| p.P4P           | ENST00000287907 | 1/2   | 209 |
| p.S703S         | ENST00000342160 | 22/83 | 32  |
| p.R1996H        | ENST00000342160 | 44/83 | 41  |
| p.V128I         | ENST00000407780 | 3/7   | 72  |
|                 | ENST00000407780 |       | 17  |
|                 | ENST00000407780 | 7/7   | 26  |
|                 | ENST00000330062 |       | 26  |
|                 | ENST00000299518 |       | 62  |
| p.S179T         | ENST00000368131 | 4/11  | 87  |
| p.F10V          | ENST00000342136 | 2/9   | 72  |
|                 | ENST00000268035 |       | 16  |
|                 | ENST00000356956 |       | 25  |
|                 | ENST00000356956 |       | 93  |
|                 | ENST00000356956 |       | 98  |
|                 | ENST00000270642 |       | 42  |
|                 | ENST00000370903 | 8/20  | 85  |
| p.Y857Y         | ENST00000370903 | 14/20 | 77  |
|                 | ENST00000370903 |       | 25  |
|                 | ENST00000393775 |       | 33  |
|                 | ENST00000393775 | 7/7   | 97  |
| p.E333D         | ENST00000393775 |       | 27  |
|                 | ENST00000513874 |       | 61  |
|                 | ENST00000533871 |       | 10  |
| p.L1023L        | ENST00000374647 | 28/37 | 87  |
|                 | ENST00000295981 |       | 72  |
| p.S177Y         | ENST00000316649 | 4/7   | 88  |
|                 | ENST00000270800 |       | 116 |
|                 | ENST00000379959 | 8/8   | 91  |
|                 | ENST00000563197 | 7/7   | 64  |
|                 | ENST00000397262 | 2/2   | 114 |
| p.A550A         | ENST00000397270 |       | 27  |
|                 | ENST00000302850 | 8/22  | 89  |
|                 | ENST00000302850 |       | 12  |
|                 | ENST00000404767 |       | 29  |
|                 | ENST00000404767 |       | 27  |
|                 | ENST00000311234 |       | 5   |
|                 | ENST00000274364 |       | 32  |
|                 | ENST00000361170 |       | 18  |
|                 | ENST00000538872 |       | 86  |
| ENST00000357234 |                 | 66    |     |
| p.V319V         | ENST00000244314 | 2/2   | 156 |

VEP annotated somatic variants

|               |                 |       |     |
|---------------|-----------------|-------|-----|
|               | ENST00000369304 |       | 57  |
|               | ENST00000369304 |       | 171 |
|               | ENST00000397033 |       | 46  |
|               | ENST00000264741 |       | 125 |
|               | ENST00000266041 |       | 6   |
| p.V130V       | ENST00000266041 | 4/24  | 110 |
|               | ENST00000266041 |       | 28  |
|               | ENST00000373298 |       | 23  |
|               | ENST00000429204 |       | 132 |
|               | ENST00000381340 |       | 54  |
|               | ENST00000381340 |       | 17  |
|               | ENST00000374316 |       | 141 |
| p.I243I       | ENST00000278071 | 3/3   | 72  |
|               | ENST00000381318 |       | 58  |
|               | ENST00000381318 |       | 36  |
|               | ENST00000226319 |       | 20  |
|               | ENST00000218343 |       | 19  |
|               | ENST00000298622 |       | 84  |
|               | ENST00000341776 |       | 24  |
|               | ENST00000341776 |       | 98  |
| p.P402P       | ENST00000341776 | 7/18  | 97  |
|               | ENST00000458427 | 1/1   | 20  |
|               | ENST00000382303 | 16/16 | 110 |
|               | ENST00000371153 |       | 57  |
| p.S526S       | ENST00000371153 | 3/10  | 150 |
| p.H927H       | ENST00000371153 | 9/10  | 99  |
| p.L78L        | ENST00000367411 | 3/11  | 71  |
| p.P189R       | ENST00000221444 | 2/2   | 51  |
|               | ENST00000490337 |       | 30  |
|               | ENST00000399881 |       | 49  |
|               | ENST00000476647 |       | 44  |
|               | ENST00000228495 |       | 45  |
|               | ENST00000405872 | 2/2   | 30  |
|               | ENST00000314358 |       | 14  |
|               | ENST00000372396 |       | 16  |
|               | ENST00000159111 |       | 53  |
|               | ENST00000317961 |       | 15  |
| p.T726K       | ENST00000377967 | 17/29 | 55  |
|               | ENST00000397560 |       | 69  |
| p.R538R       | ENST00000397560 | 12/20 | 55  |
| p.R644S       | ENST00000397560 | 15/20 | 49  |
| p.N11N        | ENST00000251993 | 1/10  | 100 |
|               | ENST00000264501 |       | 13  |
| p.S689A       | ENST00000251691 | 12/34 | 150 |
|               | ENST00000297591 |       | 13  |
| p.A1162A      | ENST00000392413 | 4/4   | 109 |
|               | ENST00000368847 |       | 21  |
|               | ENST00000367350 |       | 38  |
| p.Y90Y        | ENST00000247986 | 2/15  | 61  |
|               | ENST00000389916 |       | 29  |
| GTGTTGTTAACAT | ENST00000498729 |       | 22  |
|               | ENST00000320785 |       | 29  |
|               | ENST00000260753 |       | 14  |
|               | ENST00000361580 |       | 33  |
|               | ENST00000379562 |       | 54  |

VEP annotated somatic variants

|                 |                 |                 |     |
|-----------------|-----------------|-----------------|-----|
| p.T216T         | ENST00000285407 | 3/4             | 78  |
| p.V13V          | ENST00000514860 | 2/15            | 39  |
|                 | ENST00000273963 |                 | 23  |
|                 | ENST00000356986 |                 | 23  |
|                 | ENST00000262189 |                 | 86  |
|                 | ENST00000304613 |                 | 141 |
| p.T312T         | ENST00000333479 |                 | 108 |
|                 | ENST00000327442 | 7/10            | 129 |
|                 | ENST00000290158 |                 | 27  |
|                 | ENST00000327813 |                 | 45  |
|                 | ENST00000269576 |                 | 27  |
|                 | ENST00000225899 |                 | 148 |
|                 | ENST00000328119 | 7/7             | 10  |
|                 | ENST00000397911 | 1/1             | 115 |
|                 | ENST00000397907 | 1/1             | 22  |
|                 | p.T110T         | ENST00000391618 | 1/1 |
| ENST00000216237 |                 |                 | 103 |
| ENST00000421865 |                 |                 | 19  |
| ENST00000421865 |                 |                 | 48  |
| ENST00000230538 |                 |                 | 52  |
| ENST00000230538 |                 |                 | 71  |
| ENST00000258341 |                 |                 | 31  |
| ENST00000258341 |                 |                 | 11  |
| ENST00000258341 |                 |                 | 43  |
| ENST00000264144 |                 | 1/23            | 20  |
| ENST00000543571 |                 | 4/8             | 83  |
| ENST00000333881 |                 | 1/1             | 19  |
| ENST00000371688 |                 |                 | 2   |
| ENST00000344642 |                 |                 | 50  |
| ENST00000308330 |                 | 18              |     |
| ENST00000222725 |                 | 93              |     |
| ENST00000291759 |                 | 73              |     |
| ENST00000336180 |                 | 26              |     |
| p.R426H         | ENST00000585527 | 1/1             | 158 |
|                 | ENST00000267102 |                 | 15  |
|                 | ENST00000465261 |                 | 67  |
|                 | ENST00000231368 |                 | 21  |
| p.A14A          | ENST00000398246 |                 | 16  |
|                 | ENST00000371628 | 1/11            | 54  |
|                 | ENST00000371628 |                 | 24  |
|                 | ENST00000261921 |                 | 122 |
|                 | ENST00000312675 |                 | 31  |
|                 | ENST00000354454 |                 | 26  |
|                 | ENST00000389484 |                 | 132 |
| p.R188W         | ENST00000294304 |                 | 53  |
|                 | ENST00000402859 | 5/6             | 149 |
|                 | ENST00000402859 |                 | 32  |
|                 | ENST00000500728 |                 | 78  |
|                 | ENST00000298288 |                 | 30  |
| p.G7V           | ENST00000374160 | 1/2             | 106 |
|                 | ENST00000360375 | 19/19           | 38  |
|                 | ENST00000393217 |                 | 23  |
| p.L92P          | ENST00000265245 | 3/14            | 34  |
| p.R238Q         | ENST00000544216 | 5/10            | 84  |
|                 | ENST00000502781 | 4/4             | 34  |

VEP annotated somatic variants

|         |                 |       |     |
|---------|-----------------|-------|-----|
|         | ENST00000397728 |       | 44  |
|         | ENST00000389194 |       | 20  |
|         | ENST00000336930 |       | 27  |
|         | ENST00000330743 |       | 59  |
|         | ENST00000368908 | 1/3   | 23  |
|         | ENST00000370220 |       | 221 |
|         | ENST00000370220 | 1/4   | 39  |
|         | ENST00000406869 |       | 36  |
|         | ENST00000296509 |       | 68  |
|         | ENST00000356661 |       | 59  |
| p.G296G | ENST00000393900 | 3/3   | 137 |
|         | ENST00000378982 | 1/1   | 22  |
|         | ENST00000285879 |       | 54  |
| p.P303P | ENST00000247452 | 3/3   | 40  |
|         | ENST00000375068 |       | 25  |
|         | ENST00000317446 |       | 18  |
| p.C731C | ENST00000432680 | 5/5   | 75  |
|         | ENST00000368468 |       | 73  |
| p.R415R | ENST00000261483 | 8/22  | 82  |
| p.Q243P | ENST00000285599 | 6/19  | 179 |
| p.P865L | ENST00000324096 | 5/7   | 193 |
| p.A192T | ENST00000338883 | 4/29  | 82  |
|         | ENST00000361357 |       | 38  |
| p.P315P | ENST00000591517 | 13/32 | 61  |
|         | ENST00000347699 |       | 25  |
|         | ENST00000446044 |       | 47  |
|         | ENST00000251472 |       | 157 |
| p.D337D | ENST00000251472 | 10/26 | 92  |
|         | ENST00000403625 | 1/29  | 70  |
| p.R164S | ENST00000537548 | 4/11  | 97  |
|         | ENST00000265594 |       | 9   |
|         | ENST00000397708 |       | 68  |
| p.V143V | ENST00000434837 | 4/17  | 88  |
|         | ENST00000369393 |       | 13  |
|         | ENST00000369393 |       | 13  |
| p.I326I | ENST00000453960 | 3/3   | 105 |
|         | ENST00000324817 |       | 35  |
|         | ENST00000491289 | 2/5   | 72  |
|         | ENST00000312865 |       | 46  |
| p.C140S | ENST00000315588 | 3/4   | 62  |
|         | ENST00000162023 |       | 17  |
|         | ENST00000356575 |       | 27  |
|         | ENST00000269202 |       | 71  |
|         | ENST00000295408 | 19/19 | 51  |
|         | ENST00000298717 |       | 72  |
| p.P222P | ENST00000375258 | 6/10  | 40  |
|         | ENST00000398558 |       | 149 |
| p.P568P | ENST00000428789 | 12/16 | 285 |
|         | ENST00000428789 |       | 56  |
| p.F452F | ENST00000428789 | 10/16 | 228 |
| p.L115F | ENST00000306010 | 3/5   | 86  |
|         | ENST00000441493 |       | 36  |
|         | ENST00000441493 |       | 33  |
|         | ENST00000441493 |       | 75  |
|         | ENST00000317552 |       | 37  |

VEP annotated somatic variants

|          |                 |       |     |
|----------|-----------------|-------|-----|
|          | ENST00000355280 |       | 84  |
|          | ENST00000355280 |       | 175 |
|          | ENST00000228506 |       | 22  |
|          | ENST00000366624 |       | 50  |
|          | ENST00000252674 |       | 154 |
|          | ENST00000368808 |       | 73  |
|          | ENST00000252971 |       | 37  |
| p.K154Q  | ENST00000357066 | 4/5   | 151 |
|          | ENST00000355610 |       | 32  |
| p.T473I  | ENST00000355610 | 12/17 | 44  |
|          | ENST00000379535 |       | 29  |
|          | ENST00000278949 |       | 48  |
|          | ENST00000323929 |       | 25  |
| p.Y306D  | ENST00000421030 | 3/24  | 102 |
| p.H618R  | ENST00000421030 | 10/24 | 91  |
| p.V509A  | ENST00000421030 | 7/24  | 145 |
|          | ENST00000290208 |       | 150 |
|          | ENST00000371443 |       | 17  |
|          | ENST00000342071 |       | 193 |
|          | ENST00000053468 |       | 59  |
|          | ENST00000423302 |       | 68  |
|          | ENST00000233146 |       | 16  |
|          | ENST00000261507 |       | 37  |
| p.L2303L | ENST00000361445 | 49/58 | 65  |
| p.A1048A | ENST00000366577 | 29/33 | 76  |
|          | ENST00000366577 |       | 111 |
|          | ENST00000366577 |       | 53  |
|          | ENST00000366577 |       | 77  |
|          | ENST00000457717 |       | 15  |
|          | ENST00000397910 |       | 47  |
| p.A2533A | ENST00000397910 | 1/84  | 114 |
|          | ENST00000454784 | 4/84  | 54  |
|          | ENST00000454784 |       | 74  |
| p.P2554P | ENST00000441003 | 42/49 | 132 |
|          | ENST00000301012 |       | 34  |
| p.T2451T | ENST00000217939 | 7/7   | 60  |
| p.A41A   | ENST00000409745 | 3/3   | 155 |
|          | ENST00000545968 |       | 84  |
| p.A1241T | ENST00000396324 | 29/42 | 160 |
|          | ENST00000273353 |       | 76  |
| p.K365K  | ENST00000355349 | 12/40 | 38  |
|          | ENST00000355349 |       | 10  |
|          | ENST00000355349 |       | 65  |
|          | ENST00000216181 |       | 21  |
| p.T1186T | ENST00000360304 | 19/34 | 46  |
|          | ENST00000205890 |       | 22  |
|          | ENST00000335473 |       | 50  |
|          | ENST00000431794 |       | 18  |
|          | ENST00000338257 |       | 55  |
|          | ENST00000399231 |       | 25  |
|          | ENST00000595618 |       | 59  |
|          | ENST00000241651 | 1/3   | 140 |
| p.I378I  | ENST00000358913 | 5/20  | 62  |
|          | ENST00000278836 |       | 55  |
|          | ENST00000472487 |       | 21  |

VEP annotated somatic variants

|          |                 |       |     |
|----------|-----------------|-------|-----|
|          | ENST00000361671 |       | 28  |
| p.P304P  | ENST00000371753 | 2/5   | 27  |
|          | ENST00000312251 |       | 23  |
| p.A310T  | ENST00000253719 | 7/9   | 66  |
|          | ENST00000357814 |       | 45  |
|          | ENST00000281513 |       | 101 |
| p.H923R  | ENST00000422280 | 21/21 | 64  |
|          | ENST00000422280 |       | 58  |
|          | ENST00000422280 |       | 25  |
|          | ENST00000422280 |       | 50  |
| p.P92S   | ENST00000252575 | 3/15  | 164 |
|          | ENST00000315579 |       | 27  |
|          | ENST00000534548 |       | 22  |
|          | ENST00000240423 |       | 50  |
|          | ENST00000374796 |       | 73  |
|          | ENST00000268712 |       | 15  |
| p.A430A  | ENST00000367993 | 13/15 | 71  |
|          | ENST00000397345 |       | 13  |
|          | ENST00000397345 |       | 69  |
|          | ENST00000397345 |       | 79  |
| p.T354T  | ENST00000382882 | 8/11  | 26  |
| p.D170D  | ENST00000366988 | 4/4   | 32  |
|          | ENST00000366988 |       | 52  |
| p.E332A  | ENST00000334785 | 9/13  | 17  |
|          | ENST00000226574 |       | 46  |
|          | ENST00000369966 |       | 20  |
|          | ENST00000326172 |       | 13  |
| p.H104H  | ENST00000340650 | 1/1   | 59  |
|          | ENST00000427025 |       | 31  |
|          | ENST00000264187 |       | 38  |
|          | ENST00000382041 |       | 19  |
|          | ENST00000374399 |       | 25  |
| p.R213G  | ENST00000311946 | 5/6   | 30  |
|          | ENST00000282516 |       | 30  |
|          | ENST00000216121 |       | 96  |
|          | ENST00000345716 |       | 76  |
| p.S62T   | ENST00000258829 | 2/2   | 87  |
|          | ENST00000358741 |       | 17  |
|          | ENST00000404025 |       | 25  |
|          | ENST00000390649 |       | 26  |
| p.L985L  | ENST00000390649 | 11/15 | 92  |
|          | ENST00000390649 |       | 52  |
|          | ENST00000332836 |       | 45  |
|          | ENST00000330579 |       | 77  |
|          | ENST00000297990 |       | 86  |
|          | ENST00000416614 |       | 197 |
|          | ENST00000329276 | 12/12 | 32  |
|          | ENST00000361897 |       | 35  |
| p.D298E  | ENST00000297494 | 8/27  | 224 |
|          | ENST00000297494 |       | 28  |
|          | ENST00000277541 |       | 15  |
|          | ENST00000277541 |       | 27  |
| p.V1296V | ENST00000289547 | 20/20 | 37  |
| p.I145L  | ENST00000277942 | 4/4   | 61  |
| p.S241R  | ENST00000359791 | 6/9   | 154 |



VEP annotated somatic variants

|           |                 |       |     |
|-----------|-----------------|-------|-----|
|           | ENST00000265634 |       | 17  |
|           | ENST00000312521 | 1/8   | 24  |
|           | ENST00000367980 |       | 18  |
|           | ENST00000354366 |       | 28  |
| p.N1235N  | ENST00000439151 | 5/23  | 75  |
|           | ENST00000264670 |       | 60  |
|           | ENST00000422318 |       | 82  |
|           | ENST00000301411 |       | 78  |
| p.R235C   | ENST00000355451 | 4/6   | 74  |
|           | ENST00000379161 |       | 20  |
| p.I139I   | ENST00000413272 | 5/19  | 30  |
|           | ENST00000229179 |       | 33  |
|           | ENST00000359428 |       | 14  |
|           | ENST00000340413 | 1/8   | 111 |
|           | ENST00000347635 | 8/8   | 57  |
|           | ENST00000264883 |       | 18  |
|           | ENST00000264883 |       | 81  |
|           | ENST00000573584 |       | 29  |
|           | ENST00000573584 |       | 46  |
|           | ENST00000395065 |       | 44  |
|           | ENST00000537026 |       | 21  |
|           | ENST00000537026 |       | 71  |
|           | ENST00000537026 |       | 72  |
|           | ENST00000336868 |       | 44  |
|           | ENST00000479950 |       | 15  |
| p.Y628Y   | ENST00000404537 | 5/21  | 87  |
|           | ENST00000329197 | 10/10 | 136 |
|           | ENST00000323060 |       | 21  |
|           | ENST00000316368 | 1/1   | 13  |
| p.R125Q   | ENST00000323404 | 1/1   | 70  |
| p.L182L   | ENST00000314721 | 1/1   | 55  |
| p.F15I    | ENST00000319760 | 1/1   | 44  |
|           | ENST00000314634 |       | 24  |
| p.L219L   | ENST00000380224 | 1/1   | 82  |
| p.S190S   | ENST00000317078 | 1/1   | 69  |
| p.I299V   | ENST00000304418 | 1/1   | 80  |
| p.G253G   | ENST00000356526 | 1/1   | 62  |
| p.I210I   | ENST00000301532 | 1/1   | 66  |
|           | ENST00000313033 | 1/1   | 25  |
|           | ENST00000313733 |       | 59  |
|           | ENST00000361711 |       | 57  |
| p.S285S   | ENST00000361711 | 6/6   | 201 |
|           | ENST00000274276 |       | 16  |
|           | ENST00000307050 |       | 28  |
| p.S482dup | ENST00000285848 | 10/10 | 59  |
| p.N178T   | ENST00000374519 | 1/1   | 107 |
| p.I238I   | ENST00000331483 | 5/11  | 83  |
| p.K229E   | ENST00000372858 | 5/16  | 53  |
|           | ENST00000320580 |       | 40  |
|           | ENST00000289619 |       | 36  |
|           | ENST00000338448 |       | 70  |
|           | ENST00000307534 |       | 25  |
| p.L204L   | ENST00000307534 | 1/7   | 38  |
| p.A547V   | ENST00000378466 | 13/19 | 163 |
|           | ENST00000238714 |       | 18  |

VEP annotated somatic variants

|          |                 |       |     |
|----------|-----------------|-------|-----|
| p.R28S   | ENST00000371279 | 2/2   | 178 |
| p.R242R  | ENST00000334956 | 6/13  | 143 |
|          | ENST00000406477 |       | 75  |
| p.I73T   | ENST00000429538 | 1/1   | 45  |
|          | ENST00000527246 |       | 79  |
| p.G1121V | ENST00000361849 | 5/5   | 17  |
|          | ENST00000544246 |       | 60  |
| p.V178I  | ENST00000333891 | 5/8   | 25  |
|          | ENST00000367384 |       | 67  |
| p.R23W   | ENST00000359568 | 1/3   | 119 |
|          | ENST00000311180 |       | 81  |
| p.I735I  | ENST00000435564 | 26/31 | 36  |
|          | ENST00000334456 |       | 53  |
| p.L84L   | ENST00000371447 | 1/22  | 99  |
|          | ENST00000257290 |       | 9   |
| p.P1084P | ENST00000261799 | 23/23 | 27  |
|          | ENST00000261799 |       | 35  |
| p.S1542T | ENST00000376215 | 7/7   | 70  |
|          | ENST00000396410 |       | 74  |
| p.P3P    | ENST00000396410 | 3/24  | 39  |
|          | ENST00000370215 |       | 47  |
| p.P440P  | ENST00000560626 | 12/24 | 96  |
|          | ENST00000338302 |       | 38  |
| p.L435F  | ENST00000338302 | 14/15 | 123 |
|          | ENST00000244137 |       | 43  |
| p.R394Q  | ENST00000244137 | 15/15 | 48  |
|          | ENST00000381125 |       | 52  |
| p.A127A  | ENST00000381125 | 3/5   | 48  |
|          | ENST00000354764 |       | 24  |
| p.T670T  | ENST00000373316 | 1/7   | 32  |
|          | ENST00000340880 |       | 56  |
| p.N126D  | ENST00000290722 | 22/31 | 38  |
|          | ENST00000359246 |       | 18  |
| p.A44A   | ENST00000275034 | 2/2   | 16  |
|          | ENST00000373542 |       | 17  |
| p.G390G  | ENST00000361417 | 4/18  | 58  |
|          | ENST00000416188 |       | 82  |
| p.T670T  | ENST00000369738 | 6/6   | 61  |
|          | ENST00000370812 |       | 20  |
| p.N126D  | ENST00000357637 | 2/2   | 47  |
|          | ENST00000592983 |       | 88  |
| p.A44A   | ENST00000447110 | 2/6   | 49  |
|          | ENST00000264380 |       | 13  |
| p.G390G  | ENST00000360612 | 2/2   | 130 |
|          | ENST00000332271 |       | 82  |
| p.G390G  | ENST00000361478 | 1/2   | 80  |
|          | ENST00000529079 |       | 26  |
| p.G390G  | ENST00000371117 | 1/2   | 40  |
|          | ENST00000070846 |       | 18  |
| p.G390G  | ENST00000274793 | 2/2   | 26  |
|          | ENST00000220809 |       | 65  |
| p.G390G  | ENST00000327757 | 1/2   | 21  |
|          | ENST00000371380 |       | 38  |
| p.G390G  | ENST00000371380 | 1/2   | 45  |
|          | ENST00000371380 |       | 45  |

VEP annotated somatic variants

|              |                 |       |     |
|--------------|-----------------|-------|-----|
|              | ENST00000371380 |       | 23  |
| p.T1777I     | ENST00000371380 | 23/32 | 141 |
|              | ENST00000359376 |       | 19  |
|              | ENST00000449969 |       | 73  |
|              | ENST00000449969 |       | 24  |
| p.H1459R     | ENST00000322810 | 30/32 | 173 |
| p.A263A      | ENST00000322810 | 5/32  | 193 |
|              | ENST00000322810 | 32/32 | 32  |
| p.N2888N     | ENST00000322810 | 32/32 | 179 |
| p.A4624A     | ENST00000322810 | 32/32 | 108 |
| p.A3846A     | ENST00000322810 | 32/32 | 157 |
|              | ENST00000537245 |       | 19  |
|              | ENST00000329153 |       | 12  |
|              | ENST00000329153 |       | 19  |
|              | ENST00000329153 |       | 71  |
|              | ENST00000379410 |       | 115 |
|              | ENST00000334770 |       | 27  |
|              | ENST00000315392 |       | 16  |
|              | ENST00000449103 |       | 33  |
|              | ENST00000369239 |       | 14  |
| p.T490M      | ENST00000394571 | 7/8   | 81  |
|              | ENST00000216180 |       | 67  |
| p.P707P      | ENST00000414982 | 19/34 | 209 |
|              | ENST00000548729 |       | 20  |
|              | ENST00000301788 |       | 14  |
|              | ENST00000377603 |       | 22  |
|              | ENST00000377603 |       | 24  |
|              | ENST00000379747 |       | 24  |
| p.K182T      | ENST00000465342 | 2/2   | 46  |
| p.P12A       | ENST00000287820 | 1/7   | 81  |
| p.H477H      | ENST00000287820 | 7/7   | 80  |
|              | ENST00000412327 |       | 18  |
| p.P43_E44dup | ENST00000308249 | 1/7   | 147 |
|              | ENST00000367999 |       | 88  |
|              | ENST00000330261 |       | 46  |
|              | ENST00000455566 | 7/7   | 105 |
|              | ENST00000264977 |       | 11  |
|              | ENST00000218224 |       | 21  |
|              | ENST00000264808 |       | 40  |
|              | ENST00000339711 |       | 29  |
|              | ENST00000379341 |       | 55  |
|              | ENST00000379341 |       | 35  |
|              | ENST00000379341 |       | 35  |
|              | ENST00000369110 |       | 72  |
|              | ENST00000288368 |       | 37  |
|              | ENST00000311862 |       | 31  |
|              | ENST00000314970 | 3/14  | 24  |
|              | ENST00000394729 |       | 69  |
|              | ENST00000394729 |       | 33  |
|              | ENST00000378567 |       | 132 |
|              | ENST00000324366 |       | 25  |
| p.P182L      | ENST00000419421 | 3/3   | 114 |
|              | ENST00000403581 |       | 23  |
|              | ENST00000352766 |       | 99  |
|              | ENST00000268281 |       | 35  |

VEP annotated somatic variants

|         |                 |       |     |
|---------|-----------------|-------|-----|
|         | ENST00000376718 |       | 62  |
|         | ENST00000406487 |       | 94  |
|         | ENST00000406070 |       | 80  |
|         | ENST00000270077 |       | 121 |
|         | ENST00000356126 |       | 55  |
|         | ENST00000331573 |       | 35  |
|         | ENST00000317615 | 1/7   | 99  |
|         | ENST00000407693 |       | 29  |
|         | ENST00000254667 |       | 96  |
|         | ENST00000359947 |       | 9   |
|         | ENST00000474889 |       | 15  |
|         | ENST00000368213 |       | 48  |
| p.P805P | ENST00000389418 | 16/23 | 323 |
|         | ENST00000293922 |       | 20  |
|         | ENST00000426105 |       | 21  |
|         | ENST00000426105 |       | 17  |
|         | ENST00000426105 |       | 82  |
|         | ENST00000426105 |       | 68  |
|         | ENST00000302000 |       | 26  |
|         | ENST00000240651 | 1/12  | 26  |
|         | ENST00000325874 |       | 76  |
| p.V19A  | ENST00000264601 | 2/6   | 59  |
|         | ENST00000243662 | 1/3   | 71  |
|         | ENST00000276066 |       | 47  |
|         | ENST00000262477 |       | 39  |
| p.R474R | ENST00000399409 | 14/16 | 89  |
|         | ENST00000306897 |       | 149 |
|         | ENST00000487270 |       | 25  |
| p.A725A | ENST00000399583 | 10/15 | 106 |
|         | ENST00000251849 |       | 112 |
|         | ENST00000515799 |       | 15  |
|         | ENST00000290101 |       | 34  |
|         | ENST00000449771 |       | 118 |
|         | ENST00000298854 |       | 27  |
| p.R28H  | ENST00000357043 | 1/6   | 72  |
| p.R793R | ENST00000377604 | 21/24 | 87  |
|         | ENST00000267229 |       | 110 |
|         | ENST00000265271 |       | 20  |
|         | ENST00000339877 |       | 47  |
| p.P520P | ENST00000377966 | 13/21 | 68  |
|         | ENST00000221452 |       | 55  |
|         | ENST00000258062 |       | 14  |
| p.L14*  | ENST00000295755 | 1/3   | 36  |
|         | ENST00000354373 | 1/2   | 46  |
| p.T541T | ENST00000296292 | 13/13 | 29  |
|         | ENST00000296292 |       | 59  |
|         | ENST00000334133 |       | 93  |
|         | ENST00000393423 | 1/19  | 104 |
|         | ENST00000366565 |       | 37  |
|         | ENST00000538017 | 1/7   | 96  |
| p.T777T | ENST00000332512 | 8/8   | 31  |
|         | ENST00000283632 |       | 58  |
|         | ENST00000283632 | 1/9   | 50  |
|         | ENST00000221486 |       | 37  |
| p.V41V  | ENST00000367559 | 2/7   | 108 |

VEP annotated somatic variants

|          |                 |        |     |
|----------|-----------------|--------|-----|
|          | ENST00000587250 | 5/5    | 24  |
|          | ENST00000347063 |        | 28  |
|          | ENST00000373456 |        | 39  |
|          | ENST00000399398 | 3/3    | 19  |
|          | ENST00000464233 |        | 37  |
|          | ENST00000464233 |        | 52  |
| p.T431N  | ENST00000315872 | 10/33  | 77  |
|          | ENST00000371079 |        | 67  |
|          | ENST00000368508 |        | 37  |
|          | ENST00000434291 |        | 59  |
|          | ENST00000422931 |        | 34  |
|          | ENST00000472454 |        | 51  |
|          | ENST00000518559 |        | 74  |
|          | ENST00000428747 |        | 26  |
|          | ENST00000005386 |        | 91  |
|          | ENST00000331302 |        | 124 |
|          | ENST00000222247 |        | 68  |
|          | ENST00000422514 | 1/5    | 18  |
|          | ENST00000422514 | 1/5    | 18  |
| p.P37P   | ENST00000216146 | 2/10   | 42  |
| p.L164L  | ENST00000316084 | 5/7    | 35  |
|          | ENST00000503859 |        | 25  |
|          | ENST00000306801 |        | 25  |
| p.T842T  | ENST00000306801 | 22/34  | 252 |
|          | ENST00000340648 |        | 59  |
| p.A201A  | ENST00000340648 | 7/16   | 100 |
| p.V194V  | ENST00000258955 | 4/9    | 110 |
|          | ENST00000377921 |        | 35  |
| p.V471A  | ENST00000377819 | 3/9    | 85  |
|          | ENST00000319449 |        | 45  |
| p.P688P  | ENST00000319449 | 18/18  | 128 |
|          | ENST00000388768 |        | 14  |
|          | ENST00000481739 |        | 85  |
| p.I1152I | ENST00000359596 | 26/106 | 126 |
|          | ENST00000359596 |        | 81  |
| p.Y2128Y | ENST00000359596 | 39/106 | 65  |
|          | ENST00000359596 |        | 57  |
|          | ENST00000366574 |        | 68  |
|          | ENST00000366574 |        | 33  |
|          | ENST00000389232 |        | 77  |
|          | ENST00000382533 |        | 4   |
|          | ENST00000371872 |        | 25  |
|          | ENST00000246868 |        | 47  |
| p.T1853T | ENST00000380817 | 40/41  | 162 |
|          | ENST00000256190 |        | 46  |
|          | ENST00000360565 |        | 26  |
| p.G126G  | ENST00000302631 | 4/9    | 70  |
|          | ENST00000266214 |        | 59  |
|          | ENST00000349847 |        | 23  |
| p.H61R   | ENST00000297029 | 1/16   | 62  |
|          | ENST00000281142 |        | 29  |
|          | ENST00000281142 |        | 46  |
|          | ENST00000369020 |        | 102 |
|          | ENST00000283254 |        | 46  |
| p.W1150R | ENST00000409672 | 19/27  | 40  |

VEP annotated somatic variants

|         |                 |       |     |
|---------|-----------------|-------|-----|
|         | ENST00000409672 |       | 17  |
|         | ENST00000272091 |       | 19  |
|         | ENST00000404826 |       | 26  |
|         | ENST00000350697 |       | 104 |
| p.R20W  | ENST00000402034 | 2/12  | 94  |
|         | ENST00000308284 |       | 37  |
| p.H489Q | ENST00000336714 | 13/20 | 59  |
|         | ENST00000280551 |       | 39  |
|         | ENST00000370345 |       | 2   |
|         | ENST00000370345 |       | 13  |
| p.V89A  | ENST00000370345 | 4/26  | 109 |
|         | ENST00000370345 |       | 23  |
|         | ENST00000375807 |       | 19  |
| p.Y244D | ENST00000269389 | 5/5   | 49  |
|         | ENST00000333360 |       | 45  |
|         | ENST00000263686 |       | 41  |
|         | ENST00000265362 |       | 31  |
|         | ENST00000265362 |       | 47  |
|         | ENST00000002829 |       | 65  |
|         | ENST00000396426 |       | 47  |
|         | ENST00000467132 |       | 31  |
|         | ENST00000357949 |       | 41  |
|         | ENST00000267197 |       | 30  |
|         | ENST00000267197 |       | 34  |
|         | ENST00000402198 |       | 21  |
| p.G37G  | ENST00000248933 | 2/17  | 191 |
|         | ENST00000302516 |       | 54  |
|         | ENST00000367569 | 1/1   | 59  |
|         | ENST00000373202 |       | 33  |
|         | ENST00000268989 |       | 21  |
|         | ENST00000268989 |       | 27  |
|         | ENST00000248929 |       | 117 |
|         | ENST00000482504 |       | 41  |
| p.A534A | ENST00000355946 | 14/14 | 214 |
|         | ENST00000293441 |       | 35  |
|         | ENST00000293441 |       | 103 |
|         | ENST00000297261 |       | 63  |
| p.A986T | ENST00000380913 | 6/10  | 159 |
|         | ENST00000291707 |       | 37  |
|         | ENST00000270162 |       | 24  |
|         | ENST00000290399 |       | 281 |
|         | ENST00000366630 |       | 7   |
|         | ENST00000368043 |       | 73  |
| p.T32T  | ENST00000273861 | 1/3   | 103 |
| p.I114V | ENST00000273905 | 1/6   | 86  |
|         | ENST00000264930 |       | 23  |
|         | ENST00000194130 |       | 65  |
| p.S33P  | ENST00000587091 | 1/6   | 29  |
|         | ENST00000221742 |       | 19  |
|         | ENST00000221742 |       | 56  |
| p.L95L  | ENST00000245407 | 1/10  | 52  |
|         | ENST00000353963 |       | 18  |
| p.H165H | ENST00000532405 | 6/17  | 204 |
|         | ENST00000416240 |       | 10  |
|         | ENST00000377095 |       | 17  |

VEP annotated somatic variants

|          |                 |        |     |
|----------|-----------------|--------|-----|
|          | ENST00000377095 |        | 36  |
|          | ENST00000361193 |        | 28  |
|          | ENST00000394573 |        | 60  |
|          | ENST00000347644 |        | 29  |
|          | ENST00000373371 |        | 38  |
|          | ENST00000378509 |        | 52  |
|          | ENST00000360388 |        | 40  |
|          | ENST00000366618 |        | 8   |
|          | ENST00000308074 |        | 79  |
|          | ENST00000420502 |        | 56  |
|          | ENST00000570101 |        | 28  |
| p.V552V  | ENST00000024061 | 6/8    | 153 |
|          | ENST00000485713 |        | 27  |
|          | ENST00000222248 |        | 72  |
|          | ENST00000371900 |        | 23  |
|          | ENST00000335875 |        | 32  |
|          | ENST00000401766 |        | 125 |
|          | ENST00000360584 |        | 45  |
|          | ENST00000316902 |        | 73  |
| p.S382S  | ENST00000316902 | 9/11   | 56  |
| p.A48A   | ENST00000328306 | 1/17   | 52  |
|          | ENST00000310926 |        | 5   |
|          | ENST00000371122 |        | 27  |
|          | ENST00000283131 |        | 8   |
|          | ENST00000357450 |        | 33  |
| p.Q42Q   | ENST00000361956 | 2/12   | 84  |
|          | ENST00000358743 |        | 44  |
|          | ENST00000388985 |        | 42  |
|          | ENST00000371247 |        | 12  |
|          | ENST00000507866 |        | 85  |
| p.N189N  | ENST00000336338 | 5/49   | 73  |
| p.P464P  | ENST00000336338 | 11/49  | 70  |
| p.P80P   | ENST00000370498 | 2/2    | 40  |
|          | ENST00000377470 |        | 28  |
|          | ENST00000312358 |        | 35  |
| p.E2389G | ENST00000312358 | 30/41  | 34  |
| p.V200L  | ENST00000301244 | 7/7    | 39  |
| p.P4P    | ENST00000373109 | 1/11   | 35  |
|          | ENST00000320955 |        | 28  |
|          | ENST00000320955 |        | 57  |
| p.P1535A | ENST00000262518 | 25/34  | 176 |
|          | ENST00000378016 | 87/109 | 87  |
|          | ENST00000378016 |        | 160 |
|          | ENST00000378016 | 90/109 | 105 |
|          | ENST00000544814 |        | 16  |
|          | ENST00000393640 | 6/6    | 43  |
|          | ENST00000225276 |        | 17  |
|          | ENST00000225276 |        | 137 |
|          | ENST00000335791 |        | 4   |
| p.H1235H | ENST00000388887 | 34/69  | 125 |
|          | ENST00000394070 |        | 23  |
| p.N127N  | ENST00000265404 | 5/9    | 40  |
|          | ENST00000290607 |        | 19  |
|          | ENST00000392320 |        | 66  |
|          | ENST00000293328 |        | 7   |

VEP annotated somatic variants

|               |                 |       |     |
|---------------|-----------------|-------|-----|
|               | ENST00000524300 |       | 19  |
| p.A218A       | ENST00000316900 | 5/7   | 36  |
|               | ENST00000392359 | 1/5   | 47  |
|               | ENST00000275764 |       | 29  |
|               | ENST00000447404 |       | 18  |
|               | ENST00000369795 |       | 125 |
|               | ENST00000249344 |       | 55  |
|               | ENST00000321680 |       | 23  |
| p.S204G       | ENST00000075503 | 6/11  | 24  |
|               | ENST00000248600 |       | 24  |
|               | ENST00000362032 | 3/3   | 31  |
|               | ENST00000332859 |       | 110 |
| p.V55M        | ENST00000326669 | 1/1   | 101 |
|               | ENST00000599117 |       | 11  |
|               | ENST00000599117 |       | 38  |
|               | ENST00000375472 |       | 39  |
|               | ENST00000318950 |       | 27  |
| p.A1127A      | ENST00000245934 | 26/27 | 48  |
|               | ENST00000432424 |       | 13  |
| p.L133L       | ENST00000358025 | 6/116 | 53  |
|               | ENST00000358025 |       | 59  |
| p.D950D       | ENST00000355585 | 20/27 | 121 |
| p.P566L       | ENST00000336292 | 5/5   | 97  |
| p.G154A       | ENST00000307142 | 3/5   | 80  |
| p.V480V       | ENST00000367456 | 4/8   | 52  |
|               | ENST00000367456 |       | 50  |
| p.G514E       | ENST00000313288 | 6/16  | 101 |
|               | ENST00000372907 |       | 45  |
|               | ENST00000367066 |       | 39  |
| p.S68S        | ENST00000367066 | 5/10  | 89  |
|               | ENST00000335968 |       | 119 |
|               | ENST00000335968 |       | 25  |
| p.V256I       | ENST00000287652 | 3/8   | 74  |
|               | ENST00000287652 |       | 50  |
| p.T113M       | ENST00000337137 | 3/13  | 117 |
|               | ENST00000377636 |       | 23  |
| p.I718V       | ENST00000446818 | 23/24 | 127 |
|               | ENST00000273980 |       | 18  |
|               | ENST00000335385 |       | 30  |
| p.G68A        | ENST00000372780 | 3/3   | 39  |
| p.L496S       | ENST00000418390 | 4/11  | 30  |
|               | ENST00000296702 |       | 45  |
|               | ENST00000215838 | 9/9   | 32  |
| p.L273L       | ENST00000409874 | 6/36  | 71  |
|               | ENST00000422452 |       | 26  |
|               | ENST00000518659 |       | 5   |
|               | ENST00000603068 |       | 27  |
|               | ENST00000409262 |       | 17  |
|               | ENST00000240361 |       | 50  |
|               | ENST00000258991 |       | 97  |
| p.X105_splice | ENST00000380473 |       | 35  |
| p.T211T       | ENST00000367166 | 5/7   | 79  |
| p.A143T       | ENST00000310125 | 1/1   | 38  |
|               | ENST00000391759 |       | 85  |
|               | ENST00000212355 |       | 30  |



VEP annotated somatic variants

|          |                 |       |     |
|----------|-----------------|-------|-----|
| p.V197I  | ENST00000561129 | 1/1   | 126 |
| p.S259S  | ENST00000452443 | 6/13  | 57  |
|          | ENST00000366787 |       | 22  |
|          | ENST00000342640 |       | 34  |
| p.A578A  | ENST00000423059 | 6/28  | 137 |
|          | ENST00000288014 | 2/2   | 7   |
|          | ENST00000505747 |       | 22  |
|          | ENST00000286827 |       | 17  |
|          | ENST00000461783 |       | 47  |
| p.D557D  | ENST00000248244 | 2/2   | 225 |
|          | ENST00000169551 | 6/6   | 16  |
|          | ENST00000423516 |       | 42  |
|          | ENST00000423516 |       | 76  |
|          | ENST00000292090 | 1/4   | 20  |
| p.S563S  | ENST00000558939 | 16/20 | 61  |
|          | ENST00000558939 |       | 66  |
|          | ENST00000346027 |       | 16  |
| p.T958A  | ENST00000061240 | 20/21 | 124 |
|          | ENST00000357947 |       | 38  |
|          | ENST00000357947 |       | 98  |
| p.A844A  | ENST00000357947 | 19/21 | 97  |
|          | ENST00000561311 |       | 106 |
|          | ENST00000233638 | 1/3   | 15  |
| p.F6L    | ENST00000288025 | 1/4   | 34  |
|          | ENST00000186436 |       | 48  |
| p.R7Q    | ENST00000275767 | 2/2   | 56  |
|          | ENST00000515780 |       | 38  |
|          | ENST00000316916 |       | 62  |
|          | ENST00000515837 |       | 12  |
| p.L125L  | ENST00000341871 | 6/6   | 22  |
|          | ENST00000334830 | 10/10 | 50  |
|          | ENST00000237289 |       | 63  |
| p.R92R   | ENST00000223795 | 3/4   | 50  |
| p.S1606S | ENST00000430969 | 15/30 | 50  |
|          | ENST00000254051 |       | 35  |
| p.S498N  | ENST00000254051 | 6/13  | 72  |
| p.D358E  | ENST00000382044 | 9/28  | 77  |
| p.K1141Q | ENST00000382044 | 17/28 | 119 |
|          | ENST00000382044 |       | 71  |
| p.E36E   | ENST00000334295 | 2/7   | 57  |
|          | ENST00000538887 |       | 9   |
|          | ENST00000360578 |       | 32  |
| p.S199S  | ENST00000360578 | 4/4   | 108 |
|          | ENST00000345063 |       | 18  |
|          | ENST00000006275 |       | 56  |
|          | ENST00000330149 |       | 67  |
|          | ENST00000330149 |       | 60  |
| p.C834S  | ENST00000372922 | 12/18 | 80  |
|          | ENST00000330912 |       | 13  |
|          | ENST00000376694 |       | 69  |
|          | ENST00000377199 |       | 22  |
|          | ENST00000334634 |       | 31  |
|          | ENST00000291416 |       | 39  |
| p.M679V  | ENST00000366653 | 8/10  | 128 |
|          | ENST00000298355 |       | 68  |

VEP annotated somatic variants

|          |                 |         |     |
|----------|-----------------|---------|-----|
|          | ENST00000298355 |         | 68  |
| p.D1466D | ENST00000344204 | 29/57   | 29  |
| p.P18S   | ENST00000200457 | 1/9     | 55  |
| p.P518P  | ENST00000592062 | 15/18   | 57  |
|          | ENST00000372936 |         | 37  |
|          | ENST00000252015 |         | 31  |
|          | ENST00000542188 |         | 111 |
| p.V335L  | ENST00000155858 | 7/24    | 30  |
|          | ENST00000313478 |         | 25  |
|          | ENST00000418703 |         | 24  |
| p.M322T  | ENST00000298552 | 10/23   | 51  |
|          | ENST00000298552 |         | 48  |
|          | ENST00000219476 |         | 20  |
|          | ENST00000372003 |         | 31  |
| p.A108T  | ENST00000373020 | 3/8     | 76  |
|          | ENST00000378482 |         | 30  |
| p.R342R  | ENST00000399635 | 1/1     | 280 |
|          | ENST00000259750 |         | 17  |
| p.G623A  | ENST00000259750 | 13/15   | 107 |
|          | ENST00000310715 |         | 14  |
|          | ENST00000261647 |         | 13  |
| p.E60K   | ENST00000397906 | 2/23    | 63  |
|          | ENST00000368586 |         | 22  |
|          | ENST00000368586 | 1/58    | 62  |
|          | ENST00000368586 |         | 26  |
| p.C958C  | ENST00000368586 | 22/58   | 137 |
|          | ENST00000368586 |         | 136 |
| p.E250E  | ENST00000266254 | 8/11    | 141 |
| p.L201L  | ENST00000393382 | 5/16    | 32  |
|          | ENST00000305253 |         | 73  |
|          | ENST00000283645 | 23/23   | 55  |
|          | ENST00000248846 |         | 47  |
| p.R199R  | ENST00000367097 | 4/14    | 82  |
|          | ENST00000367097 |         | 23  |
|          | ENST00000548315 |         | 11  |
|          | ENST00000395681 |         | 79  |
|          | ENST00000319294 |         | 48  |
|          | ENST00000284273 |         | 34  |
| p.Y501Y  | ENST00000348165 | 12/23   | 138 |
|          | ENST00000375254 | 106/106 | 52  |
|          | ENST00000399598 |         | 30  |
|          | ENST00000314032 |         | 171 |
|          | ENST00000592666 | 14/17   | 23  |
|          | ENST00000276893 |         | 21  |
|          | ENST00000301831 |         | 79  |
|          | ENST00000408989 |         | 12  |
| p.D1336N | ENST00000408989 | 19/22   | 116 |
|          | ENST00000408989 |         | 82  |
|          | ENST00000268876 |         | 19  |
|          | ENST00000389221 |         | 29  |
|          |                 |         | 93  |
| p.V319V  | ENST00000326010 | 9/10    | 150 |
|          | ENST00000373383 |         | 10  |
| p.R2292H | ENST00000307340 | 36/72   | 42  |
| p.A536A  | ENST00000252597 | 10/13   | 158 |

VEP annotated somatic variants

|                  |                 |       |     |
|------------------|-----------------|-------|-----|
| p.F499*          | ENST00000219473 | 8/14  | 29  |
| p.L200L          | ENST00000218348 | 4/21  | 33  |
|                  | ENST00000215794 |       | 74  |
|                  | ENST00000315480 |       | 86  |
|                  | ENST00000261497 | 13/13 | 46  |
|                  | ENST00000398571 |       | 13  |
|                  | ENST00000296792 |       | 50  |
|                  | ENST00000261637 |       | 11  |
|                  | ENST00000261637 |       | 21  |
|                  | ENST00000331397 |       | 4   |
|                  | ENST00000544301 |       | 24  |
| p.G417S          | ENST00000262178 | 13/13 | 55  |
|                  | ENST00000435505 |       | 20  |
| p.L223L          | ENST00000554659 | 6/6   | 59  |
|                  | ENST00000423497 |       | 9   |
|                  | ENST00000423497 |       | 80  |
| p.R216W          | ENST00000297873 | 6/6   | 89  |
|                  | ENST00000325239 |       | 87  |
|                  | ENST00000263461 |       | 17  |
| p.T278T          | ENST00000263461 | 6/29  | 70  |
|                  | ENST00000263461 |       | 32  |
| p.L986L          | ENST00000263461 | 24/29 | 91  |
|                  | ENST00000263461 |       | 108 |
|                  | ENST00000280190 |       | 82  |
|                  | ENST00000414423 |       | 87  |
|                  | ENST00000407426 |       | 34  |
|                  | ENST00000302313 |       | 39  |
|                  | ENST00000407559 |       | 28  |
| p.V2262_E2267del | ENST00000303868 | 6/6   | 29  |
|                  | ENST00000354475 |       | 47  |
|                  | ENST00000288828 |       | 61  |
| p.A141T          | ENST00000315939 | 1/28  | 60  |
| p.Q390Q          | ENST00000369684 | 5/5   | 84  |
| p.C11S           | ENST00000343737 | 1/6   | 51  |
|                  | ENST00000380773 |       | 43  |
|                  | ENST00000315436 |       | 50  |
|                  | ENST00000521089 |       | 6   |
| p.L832L          | ENST00000359154 | 23/24 | 107 |
|                  | ENST00000358368 |       | 30  |
|                  | ENST00000373884 | 3/3   | 47  |
|                  | ENST00000502935 |       | 19  |
|                  | ENST00000357137 |       | 31  |
| p.R893R          | ENST00000265351 | 24/32 | 42  |
| p.P206P          | ENST00000262887 | 7/17  | 49  |
|                  | ENST00000262887 |       | 45  |
|                  | ENST00000007699 |       | 29  |
|                  | ENST00000368339 |       | 56  |
| p.E57E           | ENST00000368339 | 1/10  | 117 |
| p.E432E          | ENST00000325144 | 3/3   | 131 |
|                  | ENST00000237275 |       | 25  |
|                  | ENST00000409806 |       | 21  |
|                  | ENST00000409806 |       | 73  |
|                  | ENST00000409806 | 2/6   | 115 |
|                  | ENST00000262577 |       | 89  |
|                  | ENST00000352645 |       | 21  |

VEP annotated somatic variants

|          |                 |       |     |
|----------|-----------------|-------|-----|
| p.P207P  | ENST00000537356 | 2/2   | 83  |
| p.N74I   | ENST00000393760 | 3/12  | 171 |
| p.T206T  | ENST00000369405 | 5/11  | 101 |
|          | ENST00000564466 |       | 48  |
|          | ENST00000316495 |       | 69  |
| p.V1545A | ENST00000419474 | 9/10  | 122 |
|          | ENST00000407775 |       | 30  |
|          | ENST00000355341 | 11/11 | 44  |
|          | ENST00000394170 |       | 28  |
|          | ENST00000231749 |       | 129 |
|          | ENST00000231749 |       | 104 |
|          | ENST00000535861 |       | 44  |
| p.C323C  | ENST00000370251 | 4/5   | 92  |
| p.L121P  | ENST00000391705 | 4/4   | 125 |
|          | ENST00000536459 |       | 136 |
|          | ENST00000410046 |       | 19  |
|          | ENST00000393927 |       | 109 |
|          | ENST00000337995 |       | 12  |
| p.T452T  | ENST00000594154 | 5/5   | 61  |
|          | ENST00000357901 |       | 90  |
|          | ENST00000339249 |       | 37  |
|          | ENST00000392288 |       | 44  |
|          | ENST00000450537 |       | 60  |
| p.S926N  | ENST00000299927 | 5/8   | 240 |
| p.S453Y  | ENST00000431526 | 11/14 | 42  |
| p.T68I   | ENST00000270649 | 4/5   | 94  |
|          | ENST00000601440 | 1/4   | 165 |
| p.G27E   | ENST00000397121 | 2/3   | 61  |
| p.S95S   | ENST00000421812 | 3/3   | 129 |
| p.K113E  | ENST00000356929 | 4/4   | 78  |
|          | ENST00000422325 |       | 19  |
| p.T478T  | ENST00000370766 | 7/7   | 62  |
| p.V193G  | ENST00000395216 | 3/3   | 40  |
| p.K417K  | ENST00000357666 | 5/5   | 91  |
| p.V866V  | ENST00000442396 | 8/8   | 143 |
| p.T158I  | ENST00000278853 | 3/12  | 119 |
|          | ENST00000448803 |       | 13  |
|          | ENST00000254323 |       | 55  |
|          | ENST00000381638 |       | 9   |

VEP annotated somatic variants

| t_ref_count | t_alt_count | n_depth | n_ref_count |
|-------------|-------------|---------|-------------|
| 15          | 2           | 32      | 32          |
| 11          | 5           | 49      | 49          |
| 56          | 8           | 112     | 112         |
| 80          | 11          | 80      | 80          |
| 25          | 3           | 102     | 102         |
| 3           | 2           | 19      | 19          |
| 25          | 3           | 75      | 75          |
| 17          | 3           | 45      | 45          |
| 100         | 13          | 183     | 183         |
| 13          | 5           | 51      | 50          |
| 155         | 25          | 249     | 249         |
| 11          | 4           | 48      | 48          |
| 30          | 4           | 39      | 39          |
| 70          | 12          | 70      | 69          |
| 58          | 8           | 47      | 47          |
| 25          | 3           | 92      | 92          |
| 24          | 6           | 22      | 22          |
| 38          | 8           | 32      | 32          |
| 29          | 5           | 33      | 33          |
| 22          | 3           | 110     | 110         |
| 26          | 3           | 60      | 60          |
| 56          | 10          | 118     | 118         |
| 52          | 12          | 170     | 170         |
| 21          | 3           | 123     | 123         |
| 55          | 12          | 72      | 72          |
| 73          | 9           | 122     | 122         |
| 80          | 14          | 126     | 126         |
| 59          | 9           | 128     | 128         |
| 117         | 15          | 129     | 129         |
| 49          | 9           | 154     | 154         |
| 47          | 7           | 60      | 59          |
| 139         | 18          | 171     | 171         |
| 81          | 11          | 153     | 153         |
| 75          | 10          | 176     | 175         |
| 44          | 6           | 68      | 68          |
| 24          | 6           | 39      | 39          |
| 155         | 21          | 247     | 247         |
| 42          | 14          | 103     | 103         |
| 22          | 5           | 69      | 69          |
| 60          | 8           | 125     | 125         |
| 21          | 3           | 28      | 28          |
| 61          | 10          | 145     | 143         |
| 21          | 3           | 67      | 67          |
| 48          | 6           | 48      | 48          |
| 34          | 6           | 71      | 71          |
| 68          | 12          | 140     | 140         |
| 130         | 20          | 252     | 252         |
| 76          | 10          | 179     | 179         |
| 203         | 24          | 438     | 436         |
| 26          | 8           | 96      | 96          |
| 25          | 3           | 52      | 52          |
| 51          | 8           | 146     | 146         |
| 42          | 9           | 63      | 63          |
| 8           | 3           | 63      | 63          |

VEP annotated somatic variants

|     |    |     |     |
|-----|----|-----|-----|
| 17  | 5  | 83  | 83  |
| 58  | 7  | 111 | 111 |
| 68  | 13 | 149 | 149 |
| 61  | 9  | 98  | 98  |
| 58  | 7  | 109 | 109 |
| 8   | 4  | 48  | 48  |
| 18  | 4  | 102 | 102 |
| 23  | 6  | 39  | 39  |
| 74  | 9  | 217 | 216 |
| 47  | 7  | 88  | 88  |
| 25  | 4  | 71  | 71  |
| 32  | 5  | 62  | 62  |
| 25  | 5  | 21  | 21  |
| 27  | 3  | 37  | 37  |
| 16  | 4  | 47  | 47  |
| 34  | 5  | 96  | 96  |
| 22  | 6  | 70  | 70  |
| 13  | 3  | 50  | 50  |
| 17  | 3  | 56  | 56  |
| 38  | 9  | 66  | 66  |
| 41  | 7  | 67  | 67  |
| 37  | 6  | 82  | 82  |
| 21  | 3  | 47  | 47  |
| 46  | 6  | 104 | 104 |
| 33  | 10 | 136 | 136 |
| 26  | 3  | 50  | 50  |
| 78  | 12 | 161 | 161 |
| 52  | 6  | 94  | 93  |
| 19  | 4  | 51  | 51  |
| 41  | 5  | 75  | 75  |
| 7   | 2  | 32  | 32  |
| 110 | 29 | 362 | 362 |
| 20  | 7  | 78  | 78  |
| 22  | 4  | 54  | 54  |
| 17  | 4  | 58  | 58  |
| 62  | 8  | 91  | 91  |
| 102 | 18 | 99  | 98  |
| 1   | 3  | 29  | 29  |
| 70  | 8  | 101 | 101 |
| 42  | 5  | 119 | 119 |
| 65  | 16 | 183 | 183 |
| 62  | 10 | 171 | 171 |
| 26  | 5  | 48  | 48  |
| 42  | 23 | 154 | 154 |
| 41  | 11 | 81  | 81  |
| 49  | 10 | 50  | 50  |
| 23  | 4  | 64  | 64  |
| 47  | 11 | 121 | 121 |
| 67  | 17 | 235 | 235 |
| 106 | 17 | 194 | 194 |
| 109 | 14 | 196 | 196 |
| 64  | 10 | 121 | 121 |
| 142 | 22 | 201 | 200 |
| 17  | 3  | 25  | 25  |
| 25  | 5  | 62  | 62  |

VEP annotated somatic variants

|     |    |     |     |
|-----|----|-----|-----|
| 25  | 3  | 32  | 32  |
| 21  | 5  | 60  | 60  |
| 61  | 10 | 149 | 149 |
| 56  | 8  | 156 | 156 |
| 52  | 7  | 59  | 59  |
| 8   | 4  | 42  | 42  |
| 66  | 11 | 233 | 232 |
| 15  | 3  | 41  | 41  |
| 27  | 5  | 54  | 54  |
| 22  | 4  | 46  | 46  |
| 42  | 5  | 124 | 124 |
| 133 | 18 | 165 | 165 |
| 61  | 7  | 150 | 150 |
| 53  | 9  | 75  | 75  |
| 47  | 9  | 104 | 103 |
| 19  | 8  | 41  | 41  |
| 22  | 5  | 30  | 30  |
| 21  | 3  | 60  | 60  |
| 89  | 12 | 198 | 198 |
| 40  | 5  | 75  | 75  |
| 21  | 5  | 114 | 114 |
| 115 | 16 | 236 | 236 |
| 13  | 7  | 57  | 57  |
| 60  | 12 | 78  | 78  |
| 78  | 9  | 155 | 155 |
| 27  | 13 | 94  | 94  |
| 218 | 28 | 458 | 458 |
| 74  | 10 | 71  | 71  |
| 1   | 2  | 9   | 9   |
| 63  | 12 | 151 | 151 |
| 26  | 3  | 52  | 52  |
| 34  | 4  | 100 | 100 |
| 15  | 3  | 37  | 37  |
| 15  | 4  | 49  | 49  |
| 26  | 3  | 53  | 53  |
| 83  | 13 | 173 | 173 |
| 35  | 7  | 48  | 48  |
| 25  | 5  | 41  | 40  |
| 45  | 6  | 72  | 72  |
| 45  | 7  | 132 | 132 |
| 21  | 4  | 59  | 58  |
| 43  | 5  | 39  | 39  |
| 29  | 4  | 43  | 43  |
| 44  | 6  | 48  | 48  |
| 27  | 3  | 58  | 58  |
| 71  | 10 | 101 | 100 |
| 43  | 9  | 66  | 66  |
| 38  | 8  | 65  | 65  |
| 56  | 7  | 103 | 103 |
| 8   | 6  | 36  | 36  |
| 52  | 6  | 92  | 92  |
| 19  | 3  | 33  | 33  |
| 11  | 3  | 31  | 31  |
| 23  | 12 | 38  | 38  |
| 51  | 7  | 95  | 95  |

VEP annotated somatic variants

|     |    |     |     |
|-----|----|-----|-----|
| 26  | 3  | 194 | 194 |
| 83  | 19 | 166 | 166 |
| 54  | 6  | 86  | 86  |
| 18  | 6  | 63  | 63  |
| 25  | 5  | 68  | 68  |
| 40  | 7  | 129 | 129 |
| 52  | 6  | 105 | 105 |
| 12  | 2  | 36  | 36  |
| 49  | 6  | 118 | 118 |
| 55  | 9  | 161 | 161 |
| 68  | 8  | 75  | 75  |
| 120 | 18 | 157 | 157 |
| 65  | 9  | 87  | 87  |
| 78  | 12 | 176 | 176 |
| 45  | 6  | 83  | 83  |
| 26  | 6  | 78  | 78  |
| 46  | 15 | 85  | 85  |
| 24  | 4  | 46  | 46  |
| 36  | 4  | 82  | 82  |
| 12  | 3  | 31  | 31  |
| 19  | 3  | 49  | 49  |
| 22  | 3  | 40  | 40  |
| 54  | 10 | 85  | 85  |
| 32  | 4  | 112 | 112 |
| 87  | 12 | 192 | 192 |
| 21  | 3  | 58  | 58  |
| 29  | 8  | 97  | 97  |
| 97  | 16 | 191 | 191 |
| 47  | 21 | 168 | 168 |
| 18  | 3  | 24  | 24  |
| 48  | 8  | 94  | 94  |
| 14  | 3  | 63  | 63  |
| 13  | 3  | 119 | 119 |
| 143 | 22 | 156 | 156 |
| 63  | 10 | 105 | 105 |
| 38  | 7  | 61  | 61  |
| 30  | 5  | 56  | 55  |
| 16  | 3  | 85  | 85  |
| 22  | 5  | 45  | 45  |
| 29  | 4  | 84  | 84  |
| 35  | 6  | 77  | 77  |
| 90  | 27 | 173 | 173 |
| 16  | 3  | 82  | 82  |
| 11  | 3  | 48  | 48  |
| 57  | 8  | 123 | 123 |
| 13  | 3  | 51  | 51  |
| 119 | 17 | 199 | 199 |
| 42  | 7  | 84  | 84  |
| 15  | 3  | 28  | 28  |
| 14  | 3  | 34  | 34  |
| 58  | 8  | 127 | 127 |
| 91  | 13 | 236 | 236 |
| 137 | 16 | 242 | 242 |
| 22  | 4  | 51  | 50  |
| 29  | 6  | 79  | 79  |



VEP annotated somatic variants

|     |    |     |     |
|-----|----|-----|-----|
| 22  | 3  | 19  | 19  |
| 23  | 3  | 51  | 51  |
| 25  | 4  | 59  | 59  |
| 26  | 4  | 62  | 62  |
| 29  | 4  | 49  | 49  |
| 25  | 3  | 51  | 51  |
| 49  | 9  | 79  | 79  |
| 20  | 4  | 46  | 46  |
| 173 | 29 | 246 | 246 |
| 24  | 5  | 49  | 49  |
| 33  | 6  | 82  | 82  |
| 8   | 3  | 33  | 33  |
| 97  | 12 | 175 | 174 |
| 57  | 10 | 110 | 110 |
| 76  | 15 | 108 | 108 |
| 64  | 8  | 120 | 120 |
| 28  | 5  | 61  | 61  |
| 107 | 13 | 164 | 164 |
| 28  | 5  | 77  | 77  |
| 39  | 6  | 76  | 76  |
| 19  | 3  | 149 | 149 |
| 120 | 18 | 210 | 210 |
| 64  | 9  | 79  | 79  |
| 81  | 17 | 277 | 277 |
| 19  | 3  | 81  | 81  |
| 54  | 9  | 54  | 54  |
| 84  | 11 | 97  | 97  |
| 24  | 3  | 49  | 49  |
| 108 | 15 | 274 | 274 |
| 24  | 3  | 78  | 78  |
| 92  | 14 | 141 | 141 |
| 70  | 10 | 114 | 114 |
| 68  | 9  | 118 | 118 |
| 11  | 3  | 35  | 35  |
| 28  | 5  | 57  | 57  |
| 19  | 3  | 46  | 46  |
| 13  | 4  | 45  | 45  |
| 66  | 12 | 139 | 139 |
| 41  | 9  | 104 | 104 |
| 32  | 7  | 39  | 38  |
| 28  | 5  | 52  | 52  |
| 55  | 7  | 95  | 95  |
| 16  | 3  | 61  | 61  |
| 27  | 3  | 47  | 46  |
| 33  | 7  | 82  | 82  |
| 16  | 3  | 68  | 68  |
| 42  | 5  | 104 | 104 |
| 23  | 3  | 85  | 85  |
| 19  | 4  | 56  | 56  |
| 12  | 3  | 85  | 85  |
| 54  | 8  | 83  | 83  |
| 64  | 9  | 104 | 104 |
| 64  | 14 | 71  | 71  |
| 31  | 6  | 34  | 33  |
| 19  | 5  | 44  | 43  |

VEP annotated somatic variants

|     |    |     |     |
|-----|----|-----|-----|
| 73  | 11 | 113 | 113 |
| 63  | 8  | 118 | 118 |
| 37  | 5  | 156 | 155 |
| 110 | 24 | 241 | 241 |
| 80  | 11 | 128 | 128 |
| 36  | 4  | 79  | 79  |
| 136 | 16 | 253 | 253 |
| 58  | 10 | 99  | 99  |
| 39  | 6  | 80  | 80  |
| 26  | 3  | 48  | 48  |
| 46  | 6  | 69  | 69  |
| 23  | 3  | 55  | 55  |
| 23  | 4  | 58  | 58  |
| 20  | 6  | 40  | 40  |
| 18  | 3  | 42  | 42  |
| 29  | 5  | 57  | 57  |
| 35  | 4  | 88  | 88  |
| 2   | 2  | 25  | 25  |
| 35  | 10 | 114 | 113 |
| 57  | 10 | 143 | 143 |
| 12  | 6  | 30  | 30  |
| 132 | 16 | 224 | 224 |
| 17  | 3  | 73  | 73  |
| 30  | 5  | 124 | 124 |
| 58  | 9  | 126 | 126 |
| 25  | 3  | 81  | 81  |
| 47  | 8  | 63  | 63  |
| 28  | 8  | 121 | 121 |
| 41  | 8  | 69  | 69  |
| 5   | 2  | 22  | 22  |
| 53  | 17 | 144 | 144 |
| 35  | 6  | 89  | 89  |
| 23  | 3  | 65  | 65  |
| 72  | 8  | 186 | 186 |
| 29  | 8  | 38  | 37  |
| 24  | 4  | 71  | 71  |
| 110 | 17 | 153 | 153 |
| 33  | 4  | 112 | 112 |
| 106 | 14 | 171 | 171 |
| 47  | 8  | 72  | 72  |
| 2   | 2  | 12  | 12  |
| 24  | 4  | 36  | 36  |
| 16  | 4  | 55  | 55  |
| 43  | 7  | 107 | 107 |
| 20  | 3  | 33  | 33  |
| 42  | 5  | 112 | 112 |
| 14  | 3  | 19  | 19  |
| 107 | 19 | 184 | 184 |
| 58  | 7  | 110 | 110 |
| 12  | 2  | 55  | 55  |
| 38  | 6  | 116 | 116 |
| 14  | 5  | 54  | 54  |
| 38  | 6  | 50  | 50  |
| 11  | 6  | 31  | 31  |
| 16  | 3  | 47  | 47  |

VEP annotated somatic variants

|     |    |     |     |
|-----|----|-----|-----|
| 34  | 4  | 77  | 77  |
| 36  | 7  | 86  | 86  |
| 46  | 7  | 102 | 102 |
| 71  | 10 | 142 | 142 |
| 89  | 11 | 140 | 140 |
| 53  | 11 | 165 | 165 |
| 21  | 4  | 65  | 65  |
| 82  | 10 | 157 | 156 |
| 37  | 7  | 69  | 69  |
| 27  | 5  | 110 | 110 |
| 58  | 9  | 84  | 83  |
| 80  | 9  | 138 | 138 |
| 51  | 7  | 108 | 108 |
| 16  | 3  | 62  | 62  |
| 25  | 3  | 93  | 93  |
| 15  | 8  | 74  | 74  |
| 14  | 6  | 70  | 70  |
| 37  | 6  | 134 | 134 |
| 5   | 2  | 25  | 25  |
| 1   | 4  | 12  | 12  |
| 35  | 6  | 57  | 57  |
| 94  | 16 | 128 | 128 |
| 50  | 8  | 53  | 53  |
| 42  | 5  | 84  | 84  |
| 23  | 4  | 79  | 79  |
| 104 | 17 | 233 | 233 |
| 34  | 4  | 60  | 60  |
| 49  | 7  | 67  | 67  |
| 79  | 16 | 228 | 228 |
| 17  | 3  | 38  | 38  |
| 52  | 9  | 94  | 94  |
| 11  | 4  | 165 | 165 |
| 22  | 3  | 57  | 57  |
| 14  | 3  | 53  | 53  |
| 18  | 3  | 33  | 33  |
| 58  | 10 | 221 | 221 |
| 109 | 25 | 145 | 145 |
| 46  | 9  | 103 | 103 |
| 37  | 5  | 73  | 73  |
| 112 | 16 | 190 | 190 |
| 72  | 11 | 137 | 137 |
| 53  | 13 | 64  | 64  |
| 51  | 12 | 114 | 114 |
| 18  | 3  | 68  | 68  |
| 96  | 15 | 198 | 198 |
| 47  | 7  | 128 | 128 |
| 46  | 6  | 65  | 65  |
| 15  | 2  | 34  | 34  |
| 21  | 6  | 52  | 52  |
| 46  | 9  | 79  | 79  |
| 36  | 4  | 71  | 71  |
| 25  | 3  | 130 | 130 |
| 54  | 6  | 84  | 84  |
| 54  | 11 | 131 | 131 |
| 16  | 4  | 41  | 41  |

VEP annotated somatic variants

|     |    |     |     |
|-----|----|-----|-----|
| 14  | 4  | 37  | 37  |
| 25  | 3  | 35  | 35  |
| 26  | 4  | 59  | 59  |
| 39  | 7  | 88  | 88  |
| 30  | 7  | 57  | 57  |
| 24  | 5  | 50  | 50  |
| 18  | 3  | 74  | 74  |
| 51  | 8  | 76  | 76  |
| 32  | 5  | 89  | 89  |
| 14  | 4  | 41  | 41  |
| 8   | 2  | 22  | 22  |
| 12  | 3  | 30  | 30  |
| 56  | 10 | 57  | 57  |
| 72  | 12 | 119 | 119 |
| 22  | 3  | 70  | 70  |
| 61  | 10 | 107 | 107 |
| 14  | 4  | 45  | 44  |
| 139 | 24 | 246 | 246 |
| 115 | 18 | 188 | 188 |
| 58  | 10 | 86  | 85  |
| 22  | 3  | 58  | 57  |
| 30  | 4  | 51  | 51  |
| 43  | 5  | 94  | 94  |
| 25  | 5  | 52  | 52  |
| 37  | 7  | 44  | 44  |
| 40  | 7  | 55  | 55  |
| 36  | 4  | 117 | 117 |
| 19  | 6  | 58  | 58  |
| 52  | 11 | 170 | 170 |
| 91  | 19 | 167 | 167 |
| 37  | 18 | 170 | 170 |
| 21  | 3  | 56  | 56  |
| 49  | 9  | 73  | 73  |
| 72  | 14 | 63  | 63  |
| 39  | 5  | 46  | 46  |
| 65  | 8  | 147 | 147 |
| 21  | 4  | 101 | 101 |
| 97  | 13 | 196 | 196 |
| 21  | 3  | 44  | 44  |
| 12  | 4  | 32  | 32  |
| 25  | 3  | 54  | 54  |
| 23  | 6  | 91  | 91  |
| 87  | 14 | 108 | 108 |
| 57  | 10 | 137 | 137 |
| 27  | 3  | 77  | 77  |
| 23  | 3  | 63  | 63  |
| 25  | 3  | 44  | 44  |
| 60  | 7  | 170 | 170 |
| 20  | 3  | 48  | 48  |
| 19  | 3  | 52  | 52  |
| 40  | 5  | 73  | 73  |
| 2   | 2  | 17  | 17  |
| 56  | 8  | 85  | 85  |
| 59  | 9  | 41  | 41  |
| 22  | 5  | 57  | 57  |

VEP annotated somatic variants

|     |    |     |     |
|-----|----|-----|-----|
| 80  | 11 | 211 | 211 |
| 26  | 4  | 106 | 106 |
| 55  | 7  | 103 | 103 |
| 33  | 6  | 92  | 92  |
| 26  | 3  | 71  | 71  |
| 136 | 24 | 153 | 153 |
| 131 | 22 | 299 | 299 |
| 230 | 28 | 264 | 264 |
| 9   | 4  | 51  | 51  |
| 23  | 3  | 97  | 97  |
| 64  | 9  | 94  | 94  |
| 23  | 6  | 35  | 35  |
| 16  | 4  | 56  | 56  |
| 49  | 7  | 138 | 138 |
| 32  | 4  | 106 | 106 |
| 32  | 4  | 107 | 107 |
| 54  | 7  | 85  | 85  |
| 97  | 16 | 187 | 185 |
| 24  | 3  | 72  | 72  |
| 45  | 7  | 61  | 61  |
| 21  | 3  | 35  | 35  |
| 17  | 4  | 103 | 103 |
| 30  | 5  | 66  | 66  |
| 106 | 18 | 224 | 224 |
| 24  | 3  | 72  | 72  |
| 45  | 6  | 178 | 178 |
| 67  | 9  | 99  | 99  |
| 34  | 11 | 137 | 137 |
| 50  | 6  | 123 | 123 |
| 110 | 17 | 187 | 187 |
| 33  | 9  | 88  | 88  |
| 22  | 4  | 43  | 43  |
| 15  | 5  | 62  | 61  |
| 40  | 9  | 98  | 98  |
| 54  | 11 | 72  | 72  |
| 196 | 27 | 489 | 489 |
| 6   | 3  | 31  | 31  |
| 102 | 15 | 162 | 162 |
| 18  | 3  | 48  | 48  |
| 12  | 3  | 70  | 70  |
| 32  | 5  | 53  | 53  |
| 39  | 6  | 62  | 62  |
| 24  | 9  | 86  | 86  |
| 13  | 4  | 44  | 44  |
| 42  | 7  | 102 | 102 |
| 40  | 6  | 61  | 61  |
| 53  | 12 | 121 | 121 |
| 57  | 7  | 106 | 106 |
| 8   | 3  | 20  | 20  |
| 8   | 3  | 21  | 21  |
| 53  | 8  | 103 | 102 |
| 24  | 3  | 31  | 31  |
| 39  | 7  | 93  | 93  |
| 63  | 15 | 114 | 114 |
| 64  | 8  | 115 | 115 |

VEP annotated somatic variants

|     |    |     |     |
|-----|----|-----|-----|
| 42  | 7  | 154 | 154 |
| 36  | 4  | 48  | 48  |
| 23  | 3  | 92  | 92  |
| 5   | 4  | 23  | 23  |
| 51  | 11 | 92  | 92  |
| 28  | 5  | 25  | 25  |
| 70  | 12 | 166 | 166 |
| 43  | 7  | 59  | 59  |
| 42  | 5  | 39  | 39  |
| 26  | 3  | 84  | 84  |
| 23  | 4  | 46  | 46  |
| 56  | 8  | 111 | 111 |
| 64  | 9  | 132 | 132 |
| 33  | 4  | 69  | 69  |
| 49  | 9  | 82  | 82  |
| 139 | 20 | 221 | 221 |
| 68  | 13 | 86  | 86  |
| 22  | 4  | 31  | 31  |
| 49  | 8  | 55  | 55  |
| 25  | 3  | 64  | 64  |
| 110 | 16 | 206 | 206 |
| 76  | 14 | 146 | 146 |
| 31  | 4  | 37  | 37  |
| 83  | 15 | 100 | 100 |
| 34  | 7  | 73  | 73  |
| 23  | 3  | 49  | 49  |
| 9   | 3  | 33  | 33  |
| 7   | 3  | 23  | 23  |
| 15  | 3  | 49  | 49  |
| 32  | 4  | 69  | 69  |
| 63  | 22 | 129 | 129 |
| 95  | 11 | 197 | 196 |
| 67  | 15 | 127 | 127 |
| 81  | 17 | 96  | 96  |
| 100 | 15 | 163 | 163 |
| 52  | 6  | 129 | 129 |
| 57  | 7  | 106 | 106 |
| 15  | 2  | 60  | 60  |
| 23  | 3  | 58  | 58  |
| 56  | 7  | 191 | 191 |
| 23  | 7  | 74  | 74  |
| 58  | 13 | 123 | 123 |
| 95  | 14 | 200 | 200 |
| 5   | 3  | 53  | 53  |
| 57  | 13 | 139 | 139 |
| 52  | 7  | 146 | 146 |
| 26  | 4  | 31  | 31  |
| 29  | 4  | 63  | 63  |
| 38  | 7  | 79  | 79  |
| 226 | 26 | 391 | 391 |
| 93  | 11 | 138 | 138 |
| 19  | 6  | 82  | 82  |
| 17  | 3  | 28  | 28  |
| 53  | 10 | 154 | 154 |
| 7   | 3  | 56  | 56  |

VEP annotated somatic variants

|     |    |     |     |
|-----|----|-----|-----|
| 10  | 4  | 52  | 52  |
| 45  | 6  | 91  | 91  |
| 26  | 3  | 143 | 143 |
| 130 | 17 | 233 | 233 |
| 52  | 11 | 82  | 81  |
| 14  | 3  | 59  | 59  |
| 53  | 7  | 72  | 72  |
| 108 | 19 | 136 | 136 |
| 38  | 9  | 72  | 72  |
| 76  | 13 | 252 | 252 |
| 148 | 27 | 183 | 182 |
| 15  | 4  | 34  | 34  |
| 15  | 3  | 55  | 55  |
| 25  | 10 | 193 | 193 |
| 21  | 3  | 44  | 44  |
| 37  | 7  | 75  | 74  |
| 74  | 11 | 132 | 132 |
| 128 | 15 | 161 | 161 |
| 83  | 11 | 327 | 327 |
| 134 | 18 | 204 | 204 |
| 33  | 7  | 86  | 86  |
| 88  | 13 | 167 | 167 |
| 132 | 32 | 354 | 354 |
| 95  | 14 | 205 | 205 |
| 50  | 6  | 73  | 73  |
| 6   | 2  | 19  | 19  |
| 15  | 8  | 42  | 42  |
| 29  | 6  | 70  | 70  |
| 71  | 8  | 100 | 100 |
| 119 | 22 | 160 | 160 |
| 62  | 9  | 190 | 189 |
| 59  | 8  | 95  | 95  |
| 32  | 9  | 71  | 71  |
| 33  | 4  | 82  | 82  |
| 23  | 6  | 67  | 67  |
| 42  | 5  | 89  | 89  |
| 38  | 7  | 86  | 86  |
| 33  | 5  | 66  | 66  |
| 128 | 16 | 149 | 149 |
| 29  | 4  | 34  | 34  |
| 24  | 6  | 47  | 47  |
| 72  | 10 | 130 | 130 |
| 59  | 9  | 47  | 47  |
| 102 | 15 | 139 | 139 |
| 21  | 4  | 43  | 43  |
| 71  | 12 | 160 | 160 |
| 28  | 13 | 72  | 72  |
| 110 | 22 | 195 | 195 |
| 27  | 4  | 60  | 60  |
| 31  | 5  | 84  | 84  |
| 49  | 7  | 92  | 92  |
| 255 | 37 | 515 | 515 |
| 45  | 6  | 47  | 46  |
| 63  | 9  | 147 | 147 |
| 136 | 17 | 182 | 182 |

VEP annotated somatic variants

|     |    |     |     |
|-----|----|-----|-----|
| 33  | 5  | 103 | 102 |
| 69  | 14 | 95  | 95  |
| 71  | 11 | 109 | 109 |
| 15  | 2  | 47  | 47  |
| 22  | 3  | 65  | 65  |
| 55  | 8  | 79  | 79  |
| 64  | 17 | 182 | 182 |
| 13  | 3  | 23  | 23  |
| 115 | 21 | 193 | 192 |
| 31  | 5  | 58  | 58  |
| 24  | 5  | 43  | 43  |
| 79  | 10 | 117 | 117 |
| 21  | 4  | 44  | 44  |
| 8   | 3  | 30  | 30  |
| 10  | 3  | 39  | 39  |
| 61  | 8  | 72  | 72  |
| 11  | 4  | 32  | 32  |
| 20  | 3  | 77  | 77  |
| 19  | 4  | 58  | 58  |
| 25  | 7  | 53  | 52  |
| 106 | 13 | 250 | 250 |
| 22  | 4  | 30  | 30  |
| 86  | 15 | 120 | 120 |
| 21  | 7  | 59  | 59  |
| 173 | 30 | 314 | 314 |
| 88  | 13 | 98  | 98  |
| 14  | 4  | 35  | 35  |
| 37  | 5  | 111 | 111 |
| 35  | 6  | 55  | 55  |
| 109 | 13 | 125 | 125 |
| 53  | 6  | 70  | 70  |
| 8   | 3  | 54  | 54  |
| 29  | 10 | 55  | 55  |
| 90  | 21 | 220 | 220 |
| 19  | 4  | 33  | 33  |
| 62  | 17 | 132 | 132 |
| 17  | 10 | 79  | 79  |
| 98  | 17 | 129 | 129 |
| 32  | 4  | 67  | 67  |
| 53  | 6  | 121 | 121 |
| 154 | 24 | 173 | 173 |
| 5   | 3  | 53  | 53  |
| 18  | 3  | 78  | 78  |
| 19  | 3  | 45  | 45  |
| 105 | 14 | 156 | 156 |
| 72  | 12 | 266 | 266 |
| 6   | 3  | 30  | 30  |
| 69  | 13 | 176 | 176 |
| 66  | 8  | 164 | 164 |
| 93  | 12 | 177 | 177 |
| 67  | 8  | 172 | 172 |
| 63  | 7  | 112 | 112 |
| 11  | 3  | 9   | 9   |
| 38  | 6  | 77  | 77  |
| 16  | 9  | 123 | 123 |



VEP annotated somatic variants

|     |    |     |     |
|-----|----|-----|-----|
| 85  | 16 | 325 | 325 |
| 19  | 3  | 38  | 38  |
| 77  | 15 | 154 | 154 |
| 51  | 7  | 95  | 95  |
| 34  | 5  | 69  | 69  |
| 68  | 10 | 157 | 157 |
| 25  | 7  | 69  | 69  |
| 30  | 5  | 103 | 103 |
| 34  | 4  | 61  | 61  |
| 42  | 7  | 127 | 127 |
| 41  | 5  | 73  | 73  |
| 111 | 22 | 290 | 290 |
| 107 | 15 | 121 | 121 |
| 10  | 3  | 14  | 14  |
| 184 | 25 | 458 | 458 |
| 24  | 8  | 80  | 80  |
| 34  | 7  | 68  | 68  |
| 59  | 13 | 139 | 139 |
| 14  | 3  | 66  | 66  |
| 22  | 4  | 69  | 69  |
| 22  | 4  | 78  | 78  |
| 52  | 10 | 117 | 117 |
| 77  | 10 | 156 | 156 |
| 60  | 12 | 97  | 97  |
| 13  | 3  | 27  | 27  |
| 17  | 8  | 33  | 33  |
| 80  | 13 | 89  | 89  |
| 86  | 12 | 145 | 145 |
| 37  | 5  | 139 | 139 |
| 70  | 15 | 109 | 109 |
| 65  | 12 | 78  | 78  |
| 22  | 3  | 35  | 35  |
| 28  | 5  | 73  | 73  |
| 85  | 12 | 246 | 246 |
| 24  | 3  | 53  | 53  |
| 53  | 8  | 111 | 111 |
| 7   | 3  | 50  | 50  |
| 77  | 10 | 208 | 208 |
| 63  | 9  | 88  | 88  |
| 78  | 10 | 125 | 125 |
| 104 | 12 | 258 | 258 |
| 76  | 15 | 102 | 102 |
| 55  | 9  | 80  | 80  |
| 97  | 17 | 55  | 55  |
| 18  | 9  | 28  | 28  |
| 79  | 10 | 184 | 184 |
| 8   | 4  | 35  | 35  |
| 25  | 4  | 47  | 47  |
| 24  | 3  | 58  | 58  |
| 3   | 2  | 14  | 14  |
| 26  | 6  | 72  | 72  |
| 15  | 3  | 46  | 46  |
| 76  | 10 | 100 | 100 |
| 57  | 9  | 119 | 119 |
| 137 | 19 | 220 | 220 |

VEP annotated somatic variants

|     |    |     |     |
|-----|----|-----|-----|
| 39  | 18 | 152 | 152 |
| 153 | 18 | 254 | 254 |
| 38  | 8  | 71  | 71  |
| 108 | 17 | 249 | 249 |
| 4   | 2  | 24  | 24  |
| 86  | 24 | 243 | 243 |
| 22  | 6  | 81  | 81  |
| 17  | 6  | 32  | 32  |
| 113 | 19 | 110 | 110 |
| 42  | 12 | 111 | 111 |
| 15  | 2  | 48  | 48  |
| 125 | 16 | 142 | 142 |
| 63  | 9  | 123 | 123 |
| 49  | 9  | 43  | 43  |
| 32  | 4  | 54  | 54  |
| 16  | 4  | 41  | 41  |
| 15  | 4  | 65  | 65  |
| 71  | 13 | 46  | 46  |
| 16  | 8  | 63  | 63  |
| 78  | 20 | 254 | 254 |
| 87  | 10 | 183 | 183 |
| 17  | 3  | 35  | 35  |
| 98  | 12 | 112 | 112 |
| 46  | 11 | 62  | 62  |
| 127 | 23 | 223 | 223 |
| 87  | 12 | 99  | 98  |
| 63  | 8  | 94  | 94  |
| 45  | 6  | 69  | 69  |
| 27  | 3  | 43  | 43  |
| 44  | 5  | 58  | 58  |
| 38  | 6  | 69  | 69  |
| 39  | 6  | 90  | 89  |
| 26  | 4  | 37  | 37  |
| 10  | 4  | 60  | 60  |
| 13  | 3  | 57  | 57  |
| 45  | 8  | 112 | 112 |
| 12  | 3  | 33  | 33  |
| 42  | 13 | 90  | 90  |
| 54  | 15 | 163 | 162 |
| 48  | 7  | 136 | 136 |
| 43  | 6  | 71  | 71  |
| 90  | 10 | 291 | 291 |
| 10  | 3  | 39  | 39  |
| 132 | 18 | 187 | 187 |
| 11  | 2  | 54  | 54  |
| 94  | 15 | 134 | 134 |
| 18  | 3  | 43  | 43  |
| 34  | 4  | 49  | 49  |
| 51  | 10 | 59  | 59  |
| 26  | 3  | 69  | 69  |
| 19  | 3  | 19  | 19  |
| 26  | 3  | 88  | 88  |
| 12  | 2  | 49  | 49  |
| 28  | 5  | 51  | 51  |
| 48  | 6  | 85  | 85  |

VEP annotated somatic variants

|     |    |     |     |
|-----|----|-----|-----|
| 66  | 12 | 135 | 135 |
| 32  | 7  | 120 | 117 |
| 20  | 3  | 64  | 64  |
| 20  | 3  | 57  | 57  |
| 77  | 9  | 191 | 191 |
| 118 | 23 | 186 | 186 |
| 92  | 16 | 193 | 193 |
| 105 | 24 | 210 | 209 |
| 24  | 3  | 58  | 57  |
| 38  | 7  | 149 | 149 |
| 24  | 3  | 84  | 84  |
| 133 | 15 | 318 | 318 |
| 7   | 3  | 42  | 42  |
| 102 | 13 | 111 | 111 |
| 19  | 3  | 76  | 76  |
| 62  | 13 | 98  | 98  |
| 90  | 13 | 141 | 141 |
| 15  | 4  | 30  | 30  |
| 43  | 5  | 107 | 107 |
| 45  | 7  | 80  | 79  |
| 62  | 9  | 98  | 98  |
| 25  | 6  | 51  | 51  |
| 9   | 2  | 43  | 43  |
| 37  | 6  | 65  | 65  |
| 16  | 4  | 63  | 63  |
| 72  | 11 | 181 | 181 |
| 16  | 3  | 87  | 87  |
| 0   | 2  | 10  | 10  |
| 43  | 7  | 85  | 85  |
| 15  | 3  | 42  | 42  |
| 82  | 11 | 89  | 89  |
| 65  | 8  | 66  | 66  |
| 23  | 3  | 83  | 83  |
| 140 | 18 | 174 | 173 |
| 12  | 3  | 16  | 16  |
| 57  | 10 | 118 | 118 |
| 18  | 3  | 56  | 56  |
| 13  | 3  | 55  | 55  |
| 43  | 11 | 91  | 91  |
| 21  | 3  | 43  | 43  |
| 105 | 17 | 114 | 114 |
| 27  | 4  | 49  | 49  |
| 23  | 3  | 53  | 53  |
| 118 | 14 | 219 | 219 |
| 45  | 8  | 100 | 100 |
| 118 | 31 | 292 | 292 |
| 27  | 5  | 88  | 88  |
| 65  | 13 | 164 | 164 |
| 25  | 5  | 41  | 41  |
| 93  | 13 | 105 | 105 |
| 33  | 5  | 51  | 51  |
| 20  | 3  | 62  | 62  |
| 28  | 6  | 59  | 59  |
| 74  | 10 | 152 | 152 |
| 30  | 4  | 71  | 71  |

VEP annotated somatic variants

|     |    |     |     |
|-----|----|-----|-----|
| 37  | 7  | 45  | 45  |
| 17  | 3  | 32  | 32  |
| 24  | 3  | 61  | 61  |
| 51  | 8  | 150 | 150 |
| 20  | 3  | 104 | 104 |
| 193 | 28 | 179 | 179 |
| 26  | 13 | 83  | 83  |
| 29  | 7  | 46  | 46  |
| 57  | 11 | 127 | 127 |
| 49  | 10 | 131 | 131 |
| 123 | 14 | 295 | 295 |
| 19  | 3  | 56  | 56  |
| 47  | 7  | 91  | 91  |
| 32  | 8  | 67  | 67  |
| 22  | 3  | 50  | 50  |
| 15  | 3  | 41  | 41  |
| 60  | 15 | 177 | 177 |
| 62  | 11 | 119 | 119 |
| 73  | 9  | 148 | 148 |
| 156 | 23 | 296 | 296 |
| 168 | 25 | 243 | 243 |
| 71  | 11 | 91  | 91  |
| 25  | 13 | 40  | 40  |
| 52  | 9  | 128 | 128 |
| 22  | 3  | 81  | 81  |
| 42  | 5  | 103 | 103 |
| 137 | 20 | 274 | 274 |
| 81  | 11 | 197 | 197 |
| 60  | 10 | 67  | 67  |
| 87  | 10 | 96  | 96  |
| 7   | 2  | 35  | 35  |
| 61  | 7  | 143 | 143 |
| 75  | 13 | 87  | 87  |
| 11  | 2  | 28  | 28  |
| 11  | 2  | 28  | 28  |
| 93  | 12 | 255 | 255 |
| 31  | 4  | 64  | 64  |
| 61  | 11 | 125 | 125 |
| 41  | 5  | 98  | 98  |
| 55  | 7  | 96  | 96  |
| 14  | 3  | 55  | 55  |
| 23  | 4  | 24  | 24  |
| 61  | 10 | 100 | 100 |
| 44  | 7  | 94  | 94  |
| 60  | 12 | 115 | 115 |
| 31  | 9  | 44  | 44  |
| 127 | 22 | 236 | 236 |
| 240 | 45 | 531 | 529 |
| 49  | 7  | 73  | 73  |
| 200 | 28 | 227 | 227 |
| 74  | 12 | 158 | 158 |
| 28  | 8  | 102 | 102 |
| 28  | 5  | 98  | 98  |
| 67  | 8  | 97  | 97  |
| 31  | 6  | 75  | 75  |

VEP annotated somatic variants

|     |    |     |     |
|-----|----|-----|-----|
| 71  | 13 | 220 | 220 |
| 153 | 22 | 289 | 288 |
| 15  | 7  | 72  | 72  |
| 44  | 6  | 81  | 81  |
| 137 | 17 | 203 | 202 |
| 60  | 13 | 77  | 77  |
| 33  | 4  | 80  | 80  |
| 130 | 21 | 153 | 153 |
| 22  | 10 | 39  | 39  |
| 31  | 13 | 80  | 80  |
| 26  | 3  | 46  | 46  |
| 43  | 5  | 60  | 60  |
| 22  | 3  | 65  | 65  |
| 82  | 20 | 253 | 253 |
| 75  | 16 | 170 | 170 |
| 122 | 23 | 143 | 143 |
| 134 | 16 | 177 | 177 |
| 14  | 3  | 40  | 40  |
| 156 | 37 | 324 | 324 |
| 51  | 8  | 98  | 98  |
| 54  | 14 | 142 | 142 |
| 14  | 2  | 17  | 17  |
| 32  | 5  | 34  | 34  |
| 53  | 12 | 198 | 198 |
| 62  | 14 | 126 | 126 |
| 97  | 14 | 140 | 140 |
| 45  | 8  | 63  | 63  |
| 68  | 9  | 155 | 155 |
| 13  | 2  | 50  | 49  |
| 41  | 6  | 81  | 81  |
| 102 | 12 | 225 | 225 |
| 46  | 8  | 94  | 94  |
| 65  | 9  | 184 | 184 |
| 113 | 19 | 118 | 118 |
| 30  | 4  | 38  | 38  |
| 52  | 8  | 135 | 133 |
| 137 | 18 | 127 | 127 |
| 68  | 16 | 104 | 104 |
| 134 | 26 | 311 | 311 |
| 68  | 8  | 76  | 76  |
| 34  | 4  | 33  | 33  |
| 7   | 3  | 23  | 23  |
| 54  | 11 | 124 | 124 |
| 18  | 3  | 32  | 32  |
| 36  | 10 | 104 | 104 |
| 19  | 3  | 145 | 145 |
| 45  | 5  | 45  | 45  |
| 14  | 4  | 49  | 49  |
| 49  | 6  | 57  | 57  |
| 22  | 3  | 83  | 83  |
| 52  | 7  | 178 | 176 |
| 119 | 21 | 186 | 186 |
| 52  | 10 | 103 | 103 |
| 48  | 7  | 81  | 80  |
| 18  | 3  | 53  | 53  |

VEP annotated somatic variants

|     |    |     |     |
|-----|----|-----|-----|
| 25  | 3  | 57  | 57  |
| 24  | 3  | 44  | 44  |
| 20  | 3  | 60  | 60  |
| 57  | 9  | 178 | 178 |
| 39  | 6  | 83  | 82  |
| 89  | 12 | 196 | 196 |
| 53  | 11 | 118 | 118 |
| 50  | 8  | 101 | 101 |
| 22  | 3  | 52  | 51  |
| 44  | 6  | 102 | 102 |
| 144 | 20 | 346 | 346 |
| 21  | 6  | 80  | 80  |
| 19  | 3  | 73  | 73  |
| 41  | 9  | 137 | 137 |
| 65  | 8  | 72  | 72  |
| 11  | 4  | 47  | 47  |
| 63  | 8  | 108 | 107 |
| 10  | 3  | 25  | 25  |
| 60  | 9  | 160 | 160 |
| 71  | 8  | 105 | 105 |
| 23  | 3  | 32  | 32  |
| 27  | 5  | 122 | 122 |
| 46  | 6  | 61  | 61  |
| 13  | 4  | 47  | 47  |
| 41  | 5  | 132 | 132 |
| 17  | 3  | 100 | 100 |
| 11  | 2  | 33  | 33  |
| 43  | 16 | 135 | 135 |
| 26  | 5  | 40  | 40  |
| 33  | 5  | 49  | 49  |
| 16  | 3  | 67  | 67  |
| 22  | 3  | 77  | 77  |
| 24  | 6  | 47  | 47  |
| 27  | 3  | 51  | 51  |
| 83  | 13 | 178 | 178 |
| 67  | 9  | 123 | 123 |
| 71  | 16 | 134 | 134 |
| 12  | 5  | 61  | 61  |
| 22  | 3  | 80  | 80  |
| 19  | 7  | 50  | 50  |
| 75  | 17 | 207 | 207 |
| 46  | 6  | 81  | 81  |
| 39  | 6  | 67  | 67  |
| 69  | 8  | 113 | 113 |
| 75  | 11 | 127 | 126 |
| 174 | 23 | 299 | 298 |
| 28  | 4  | 98  | 98  |
| 27  | 8  | 109 | 109 |
| 198 | 26 | 233 | 233 |
| 25  | 3  | 69  | 69  |
| 11  | 4  | 63  | 63  |
| 22  | 5  | 66  | 66  |
| 32  | 5  | 55  | 55  |
| 53  | 8  | 81  | 81  |
| 133 | 21 | 151 | 151 |

VEP annotated somatic variants

|     |    |     |     |
|-----|----|-----|-----|
| 15  | 2  | 39  | 39  |
| 19  | 5  | 19  | 19  |
| 15  | 3  | 32  | 32  |
| 24  | 4  | 83  | 83  |
| 66  | 9  | 115 | 115 |
| 54  | 6  | 113 | 113 |
| 72  | 10 | 119 | 119 |
| 68  | 10 | 83  | 83  |
| 60  | 14 | 166 | 166 |
| 17  | 3  | 23  | 23  |
| 27  | 3  | 53  | 53  |
| 29  | 4  | 65  | 65  |
| 11  | 3  | 147 | 147 |
| 95  | 16 | 282 | 282 |
| 51  | 6  | 66  | 66  |
| 15  | 3  | 34  | 34  |
| 71  | 10 | 111 | 111 |
| 21  | 8  | 53  | 53  |
| 39  | 7  | 89  | 89  |
| 38  | 6  | 79  | 79  |
| 16  | 5  | 52  | 52  |
| 61  | 10 | 102 | 102 |
| 62  | 10 | 102 | 102 |
| 39  | 5  | 77  | 77  |
| 11  | 4  | 55  | 55  |
| 77  | 10 | 146 | 146 |
| 114 | 22 | 112 | 112 |
| 15  | 6  | 51  | 51  |
| 10  | 3  | 40  | 40  |
| 60  | 10 | 162 | 162 |
| 49  | 6  | 165 | 165 |
| 39  | 5  | 65  | 65  |
| 21  | 3  | 78  | 77  |
| 73  | 9  | 210 | 210 |
| 56  | 13 | 190 | 190 |
| 66  | 14 | 218 | 218 |
| 54  | 8  | 86  | 86  |
| 57  | 9  | 154 | 154 |
| 22  | 3  | 56  | 56  |
| 52  | 7  | 86  | 86  |
| 49  | 8  | 136 | 136 |
| 178 | 23 | 451 | 449 |
| 14  | 2  | 56  | 56  |
| 25  | 3  | 73  | 73  |
| 52  | 7  | 127 | 127 |
| 94  | 13 | 144 | 144 |
| 72  | 11 | 116 | 116 |
| 47  | 6  | 89  | 89  |
| 36  | 4  | 38  | 38  |
| 29  | 7  | 84  | 84  |
| 61  | 9  | 96  | 96  |
| 20  | 5  | 78  | 78  |
| 31  | 7  | 44  | 44  |
| 146 | 17 | 170 | 170 |
| 15  | 3  | 61  | 60  |

VEP annotated somatic variants

|     |    |     |     |
|-----|----|-----|-----|
| 158 | 20 | 350 | 350 |
| 121 | 22 | 213 | 213 |
| 63  | 12 | 155 | 155 |
| 39  | 6  | 52  | 51  |
| 69  | 10 | 146 | 146 |
| 14  | 3  | 65  | 65  |
| 52  | 8  | 117 | 117 |
| 21  | 4  | 34  | 34  |
| 52  | 15 | 89  | 89  |
| 100 | 19 | 217 | 217 |
| 67  | 14 | 72  | 72  |
| 29  | 7  | 118 | 118 |
| 47  | 6  | 66  | 66  |
| 85  | 14 | 155 | 155 |
| 6   | 3  | 25  | 25  |
| 21  | 6  | 37  | 37  |
| 30  | 5  | 81  | 80  |
| 62  | 8  | 92  | 92  |
| 63  | 11 | 80  | 80  |
| 35  | 4  | 100 | 100 |
| 39  | 8  | 61  | 61  |
| 86  | 10 | 240 | 239 |
| 32  | 6  | 72  | 72  |
| 109 | 14 | 269 | 269 |
| 134 | 15 | 238 | 238 |
| 37  | 6  | 105 | 105 |
| 42  | 6  | 88  | 88  |
| 38  | 14 | 78  | 78  |
| 40  | 8  | 93  | 93  |
| 21  | 3  | 34  | 34  |
| 27  | 5  | 42  | 42  |
| 50  | 6  | 37  | 37  |
| 34  | 4  | 95  | 95  |
| 14  | 4  | 22  | 22  |
| 14  | 2  | 55  | 55  |
| 14  | 3  | 31  | 31  |
| 45  | 13 | 170 | 170 |
| 72  | 10 | 106 | 106 |
| 52  | 9  | 100 | 100 |
| 17  | 3  | 26  | 26  |
| 41  | 6  | 70  | 70  |
| 79  | 9  | 128 | 128 |
| 44  | 5  | 101 | 101 |
| 10  | 3  | 24  | 24  |
| 115 | 15 | 80  | 80  |
| 70  | 12 | 184 | 183 |
| 61  | 19 | 167 | 167 |
| 23  | 3  | 74  | 74  |
| 35  | 5  | 79  | 78  |
| 15  | 3  | 61  | 60  |
| 23  | 3  | 42  | 42  |
| 56  | 9  | 99  | 99  |
| 18  | 3  | 56  | 56  |
| 30  | 8  | 58  | 58  |
| 39  | 6  | 90  | 90  |



VEP annotated somatic variants

|     |    |     |     |
|-----|----|-----|-----|
| 20  | 3  | 55  | 55  |
| 123 | 18 | 272 | 272 |
| 15  | 4  | 33  | 33  |
| 63  | 10 | 78  | 78  |
| 21  | 3  | 64  | 64  |
| 148 | 25 | 195 | 195 |
| 169 | 24 | 211 | 211 |
| 28  | 4  | 35  | 35  |
| 140 | 39 | 254 | 254 |
| 94  | 14 | 87  | 87  |
| 137 | 20 | 277 | 276 |
| 16  | 3  | 50  | 50  |
| 9   | 3  | 73  | 73  |
| 16  | 3  | 83  | 83  |
| 62  | 9  | 91  | 91  |
| 102 | 13 | 139 | 139 |
| 24  | 3  | 86  | 86  |
| 11  | 5  | 49  | 49  |
| 28  | 5  | 30  | 30  |
| 12  | 2  | 56  | 56  |
| 71  | 10 | 121 | 121 |
| 57  | 10 | 92  | 92  |
| 188 | 21 | 215 | 215 |
| 15  | 5  | 40  | 40  |
| 11  | 3  | 46  | 46  |
| 19  | 3  | 76  | 76  |
| 21  | 3  | 47  | 47  |
| 18  | 6  | 86  | 86  |
| 40  | 6  | 104 | 104 |
| 71  | 10 | 89  | 89  |
| 66  | 14 | 159 | 159 |
| 15  | 3  | 74  | 74  |
| 120 | 27 | 197 | 197 |
| 77  | 11 | 207 | 207 |
| 41  | 5  | 70  | 70  |
| 93  | 12 | 150 | 150 |
| 8   | 3  | 48  | 48  |
| 16  | 5  | 77  | 77  |
| 34  | 6  | 99  | 99  |
| 26  | 3  | 39  | 39  |
| 40  | 15 | 87  | 87  |
| 27  | 8  | 84  | 84  |
| 27  | 8  | 85  | 85  |
| 57  | 15 | 120 | 120 |
| 31  | 6  | 105 | 105 |
| 26  | 5  | 72  | 72  |
| 21  | 3  | 69  | 69  |
| 59  | 10 | 129 | 129 |
| 29  | 4  | 64  | 63  |
| 115 | 17 | 150 | 150 |
| 21  | 4  | 68  | 68  |
| 100 | 14 | 47  | 47  |
| 19  | 4  | 63  | 63  |
| 88  | 11 | 180 | 180 |
| 30  | 5  | 50  | 49  |

VEP annotated somatic variants

|     |    |     |     |
|-----|----|-----|-----|
| 54  | 8  | 70  | 70  |
| 82  | 12 | 201 | 200 |
| 67  | 13 | 97  | 97  |
| 108 | 13 | 195 | 195 |
| 40  | 15 | 68  | 68  |
| 31  | 4  | 48  | 48  |
| 88  | 11 | 134 | 134 |
| 23  | 6  | 64  | 64  |
| 86  | 10 | 116 | 116 |
| 6   | 3  | 36  | 35  |
| 11  | 4  | 39  | 39  |
| 40  | 8  | 108 | 108 |
| 286 | 37 | 254 | 254 |
| 15  | 5  | 27  | 27  |
| 14  | 7  | 30  | 30  |
| 14  | 3  | 47  | 47  |
| 69  | 13 | 105 | 105 |
| 59  | 9  | 183 | 183 |
| 23  | 3  | 42  | 42  |
| 22  | 4  | 82  | 82  |
| 67  | 9  | 230 | 230 |
| 47  | 12 | 158 | 158 |
| 62  | 9  | 139 | 139 |
| 37  | 10 | 88  | 88  |
| 33  | 6  | 42  | 42  |
| 70  | 19 | 126 | 126 |
| 127 | 22 | 172 | 172 |
| 22  | 3  | 84  | 84  |
| 87  | 19 | 132 | 132 |
| 95  | 17 | 169 | 169 |
| 12  | 3  | 46  | 46  |
| 29  | 5  | 42  | 42  |
| 103 | 15 | 155 | 155 |
| 24  | 3  | 37  | 37  |
| 63  | 9  | 82  | 82  |
| 75  | 12 | 120 | 120 |
| 96  | 14 | 150 | 149 |
| 17  | 3  | 39  | 39  |
| 39  | 8  | 43  | 43  |
| 57  | 11 | 210 | 209 |
| 49  | 6  | 62  | 62  |
| 9   | 5  | 34  | 34  |
| 32  | 4  | 68  | 68  |
| 39  | 7  | 212 | 212 |
| 26  | 3  | 77  | 77  |
| 48  | 11 | 112 | 112 |
| 83  | 10 | 116 | 116 |
| 92  | 12 | 76  | 76  |
| 31  | 6  | 125 | 125 |
| 83  | 13 | 141 | 141 |
| 27  | 4  | 53  | 53  |
| 51  | 7  | 73  | 73  |
| 44  | 6  | 24  | 24  |
| 33  | 4  | 84  | 84  |
| 95  | 13 | 187 | 187 |

VEP annotated somatic variants

|     |    |     |     |
|-----|----|-----|-----|
| 21  | 3  | 65  | 65  |
| 23  | 5  | 44  | 44  |
| 35  | 4  | 116 | 116 |
| 16  | 3  | 20  | 20  |
| 32  | 5  | 82  | 82  |
| 46  | 6  | 106 | 106 |
| 68  | 9  | 100 | 100 |
| 60  | 7  | 83  | 83  |
| 32  | 5  | 79  | 79  |
| 53  | 6  | 68  | 68  |
| 30  | 4  | 39  | 39  |
| 44  | 7  | 100 | 100 |
| 66  | 8  | 46  | 46  |
| 23  | 3  | 38  | 38  |
| 77  | 14 | 110 | 110 |
| 103 | 21 | 324 | 324 |
| 51  | 17 | 166 | 166 |
| 16  | 2  | 75  | 75  |
| 16  | 2  | 75  | 75  |
| 35  | 7  | 64  | 64  |
| 30  | 5  | 43  | 43  |
| 21  | 4  | 43  | 43  |
| 19  | 6  | 88  | 88  |
| 226 | 26 | 392 | 392 |
| 47  | 12 | 107 | 107 |
| 88  | 12 | 113 | 113 |
| 97  | 13 | 152 | 152 |
| 31  | 4  | 100 | 100 |
| 74  | 11 | 134 | 134 |
| 38  | 7  | 110 | 110 |
| 114 | 14 | 178 | 176 |
| 11  | 3  | 27  | 27  |
| 76  | 9  | 216 | 215 |
| 112 | 14 | 209 | 209 |
| 69  | 12 | 112 | 112 |
| 57  | 8  | 60  | 60  |
| 51  | 6  | 63  | 63  |
| 51  | 17 | 102 | 102 |
| 28  | 5  | 60  | 60  |
| 67  | 10 | 92  | 92  |
| 2   | 2  | 28  | 28  |
| 22  | 3  | 94  | 94  |
| 42  | 5  | 89  | 89  |
| 144 | 18 | 381 | 381 |
| 41  | 5  | 124 | 124 |
| 23  | 3  | 70  | 70  |
| 61  | 9  | 170 | 170 |
| 50  | 9  | 102 | 102 |
| 20  | 3  | 44  | 44  |
| 53  | 9  | 75  | 75  |
| 25  | 4  | 34  | 34  |
| 40  | 6  | 57  | 57  |
| 83  | 19 | 129 | 129 |
| 37  | 9  | 72  | 72  |
| 35  | 5  | 108 | 108 |

VEP annotated somatic variants

|     |    |     |     |
|-----|----|-----|-----|
| 14  | 3  | 55  | 54  |
| 16  | 3  | 24  | 24  |
| 22  | 4  | 67  | 67  |
| 90  | 14 | 147 | 147 |
| 77  | 17 | 161 | 161 |
| 27  | 10 | 63  | 63  |
| 53  | 6  | 254 | 254 |
| 35  | 4  | 57  | 57  |
| 0   | 2  | 23  | 23  |
| 10  | 3  | 47  | 47  |
| 93  | 16 | 138 | 138 |
| 20  | 3  | 66  | 66  |
| 16  | 3  | 25  | 25  |
| 44  | 5  | 35  | 35  |
| 38  | 7  | 97  | 97  |
| 36  | 5  | 77  | 77  |
| 27  | 4  | 62  | 62  |
| 42  | 5  | 86  | 86  |
| 52  | 13 | 165 | 165 |
| 38  | 9  | 75  | 75  |
| 27  | 4  | 54  | 54  |
| 36  | 5  | 70  | 70  |
| 26  | 4  | 107 | 107 |
| 30  | 4  | 136 | 136 |
| 18  | 3  | 44  | 44  |
| 170 | 21 | 456 | 456 |
| 47  | 7  | 76  | 76  |
| 51  | 8  | 135 | 135 |
| 27  | 6  | 89  | 89  |
| 18  | 3  | 72  | 72  |
| 24  | 3  | 69  | 69  |
| 105 | 12 | 112 | 111 |
| 33  | 8  | 130 | 130 |
| 183 | 31 | 368 | 368 |
| 26  | 9  | 92  | 92  |
| 90  | 13 | 186 | 186 |
| 56  | 7  | 86  | 86  |
| 139 | 20 | 365 | 365 |
| 31  | 6  | 59  | 59  |
| 21  | 3  | 44  | 44  |
| 251 | 30 | 193 | 193 |
| 4   | 3  | 22  | 22  |
| 61  | 12 | 62  | 62  |
| 90  | 13 | 71  | 71  |
| 65  | 21 | 155 | 155 |
| 20  | 3  | 56  | 56  |
| 55  | 10 | 70  | 70  |
| 24  | 5  | 30  | 30  |
| 15  | 4  | 58  | 58  |
| 49  | 7  | 188 | 188 |
| 40  | 12 | 115 | 115 |
| 15  | 3  | 92  | 92  |
| 177 | 27 | 288 | 288 |
| 8   | 2  | 32  | 32  |
| 14  | 3  | 40  | 40  |

VEP annotated somatic variants

|     |    |     |     |
|-----|----|-----|-----|
| 32  | 4  | 30  | 30  |
| 23  | 5  | 98  | 98  |
| 49  | 11 | 68  | 68  |
| 26  | 3  | 41  | 41  |
| 33  | 5  | 65  | 65  |
| 43  | 9  | 93  | 93  |
| 29  | 11 | 80  | 80  |
| 4   | 4  | 32  | 32  |
| 71  | 8  | 127 | 127 |
| 49  | 7  | 176 | 176 |
| 25  | 3  | 84  | 84  |
| 122 | 31 | 195 | 195 |
| 21  | 6  | 42  | 42  |
| 62  | 10 | 138 | 138 |
| 18  | 5  | 36  | 36  |
| 26  | 6  | 64  | 64  |
| 110 | 15 | 155 | 155 |
| 37  | 8  | 39  | 39  |
| 64  | 9  | 108 | 108 |
| 50  | 6  | 146 | 146 |
| 44  | 8  | 18  | 18  |
| 3   | 2  | 40  | 40  |
| 24  | 3  | 60  | 60  |
| 5   | 3  | 25  | 25  |
| 29  | 4  | 58  | 58  |
| 72  | 12 | 141 | 141 |
| 39  | 5  | 133 | 133 |
| 37  | 5  | 121 | 121 |
| 9   | 3  | 39  | 39  |
| 74  | 11 | 131 | 131 |
| 62  | 11 | 110 | 108 |
| 63  | 7  | 149 | 149 |
| 34  | 6  | 115 | 115 |
| 25  | 3  | 72  | 72  |
| 28  | 7  | 132 | 130 |
| 30  | 4  | 63  | 63  |
| 35  | 4  | 88  | 87  |
| 30  | 5  | 47  | 47  |
| 25  | 3  | 63  | 63  |
| 51  | 6  | 99  | 99  |
| 152 | 24 | 311 | 310 |
| 75  | 12 | 119 | 119 |
| 138 | 22 | 194 | 194 |
| 94  | 11 | 120 | 120 |
| 13  | 3  | 52  | 52  |
| 35  | 8  | 62  | 62  |
| 14  | 3  | 70  | 70  |
| 122 | 15 | 152 | 152 |
| 2   | 2  | 10  | 10  |
| 107 | 18 | 155 | 155 |
| 20  | 3  | 74  | 74  |
| 34  | 6  | 103 | 103 |
| 16  | 3  | 89  | 89  |
| 57  | 9  | 90  | 90  |
| 4   | 3  | 48  | 48  |

VEP annotated somatic variants

|     |    |     |     |
|-----|----|-----|-----|
| 15  | 4  | 45  | 45  |
| 32  | 4  | 59  | 59  |
| 40  | 7  | 39  | 39  |
| 26  | 3  | 81  | 81  |
| 15  | 3  | 54  | 54  |
| 109 | 16 | 215 | 215 |
| 48  | 7  | 120 | 120 |
| 19  | 4  | 88  | 88  |
| 20  | 4  | 105 | 105 |
| 21  | 3  | 45  | 45  |
| 27  | 4  | 75  | 75  |
| 96  | 14 | 127 | 127 |
| 85  | 16 | 157 | 157 |
| 6   | 5  | 49  | 49  |
| 33  | 5  | 103 | 103 |
| 34  | 5  | 98  | 98  |
| 22  | 5  | 45  | 45  |
| 41  | 7  | 62  | 62  |
| 10  | 3  | 51  | 51  |
| 45  | 8  | 79  | 79  |
| 52  | 7  | 90  | 90  |
| 108 | 13 | 179 | 179 |
| 87  | 10 | 139 | 139 |
| 59  | 21 | 245 | 245 |
| 45  | 7  | 189 | 189 |
| 45  | 5  | 120 | 120 |
| 80  | 21 | 217 | 216 |
| 40  | 5  | 69  | 69  |
| 32  | 7  | 76  | 76  |
| 79  | 10 | 122 | 122 |
| 94  | 25 | 188 | 188 |
| 20  | 5  | 60  | 60  |
| 65  | 9  | 143 | 143 |
| 44  | 6  | 82  | 82  |
| 103 | 14 | 100 | 100 |
| 19  | 4  | 59  | 59  |
| 108 | 19 | 213 | 213 |
| 15  | 3  | 27  | 27  |
| 26  | 4  | 103 | 103 |
| 31  | 8  | 53  | 53  |
| 23  | 7  | 44  | 44  |
| 39  | 6  | 83  | 82  |
| 26  | 6  | 41  | 41  |
| 62  | 9  | 136 | 136 |
| 23  | 3  | 65  | 65  |
| 3   | 2  | 13  | 13  |
| 23  | 4  | 54  | 54  |
| 15  | 2  | 33  | 33  |
| 40  | 10 | 75  | 75  |
| 85  | 12 | 153 | 153 |
| 30  | 5  | 85  | 85  |
| 68  | 11 | 97  | 97  |
| 31  | 7  | 65  | 65  |
| 75  | 10 | 88  | 88  |
| 26  | 4  | 70  | 70  |

VEP annotated somatic variants

|     |    |     |     |
|-----|----|-----|-----|
| 105 | 21 | 336 | 336 |
| 46  | 11 | 171 | 171 |
| 17  | 5  | 74  | 74  |
| 28  | 6  | 28  | 28  |
| 120 | 17 | 171 | 171 |
| 5   | 2  | 31  | 31  |
| 19  | 3  | 27  | 27  |
| 14  | 3  | 53  | 53  |
| 40  | 7  | 126 | 126 |
| 191 | 34 | 305 | 305 |
| 13  | 3  | 18  | 18  |
| 32  | 10 | 89  | 89  |
| 66  | 10 | 86  | 86  |
| 17  | 3  | 25  | 25  |
| 47  | 14 | 126 | 126 |
| 52  | 14 | 57  | 57  |
| 13  | 3  | 49  | 49  |
| 107 | 17 | 244 | 244 |
| 30  | 8  | 66  | 66  |
| 82  | 16 | 191 | 191 |
| 85  | 12 | 154 | 154 |
| 95  | 11 | 145 | 145 |
| 12  | 3  | 44  | 44  |
| 29  | 5  | 55  | 55  |
| 43  | 5  | 53  | 53  |
| 47  | 9  | 142 | 142 |
| 34  | 4  | 71  | 71  |
| 53  | 9  | 71  | 71  |
| 10  | 2  | 23  | 23  |
| 18  | 4  | 87  | 87  |
| 43  | 7  | 103 | 103 |
| 49  | 14 | 137 | 137 |
| 43  | 7  | 84  | 84  |
| 37  | 13 | 118 | 118 |
| 29  | 6  | 38  | 38  |
| 63  | 9  | 117 | 117 |
| 64  | 13 | 88  | 88  |
| 102 | 17 | 222 | 222 |
| 63  | 8  | 91  | 91  |
| 45  | 12 | 127 | 127 |
| 7   | 2  | 31  | 31  |
| 26  | 6  | 61  | 61  |
| 94  | 14 | 237 | 237 |
| 15  | 3  | 77  | 77  |
| 50  | 6  | 135 | 135 |
| 59  | 8  | 60  | 60  |
| 54  | 6  | 59  | 59  |
| 67  | 13 | 106 | 106 |
| 7   | 6  | 32  | 32  |
| 57  | 12 | 96  | 96  |
| 19  | 3  | 30  | 30  |
| 27  | 4  | 79  | 79  |
| 35  | 4  | 101 | 100 |
| 104 | 24 | 199 | 199 |
| 57  | 11 | 117 | 116 |

VEP annotated somatic variants

|     |    |     |     |
|-----|----|-----|-----|
| 61  | 7  | 81  | 81  |
| 25  | 4  | 55  | 55  |
| 48  | 7  | 74  | 74  |
| 48  | 9  | 73  | 73  |
| 32  | 5  | 49  | 49  |
| 24  | 7  | 43  | 43  |
| 97  | 14 | 196 | 195 |
| 26  | 4  | 46  | 46  |
| 22  | 3  | 70  | 70  |
| 21  | 3  | 73  | 73  |
| 44  | 7  | 100 | 100 |
| 40  | 8  | 45  | 45  |
| 17  | 3  | 95  | 95  |
| 25  | 6  | 70  | 69  |
| 62  | 14 | 81  | 81  |
| 26  | 4  | 60  | 60  |
| 239 | 41 | 643 | 643 |
| 13  | 4  | 90  | 90  |
| 92  | 15 | 106 | 106 |
| 11  | 3  | 51  | 51  |
| 10  | 3  | 59  | 59  |
| 56  | 7  | 153 | 153 |
| 15  | 7  | 38  | 38  |
| 54  | 8  | 62  | 62  |
| 23  | 3  | 39  | 39  |
| 122 | 15 | 214 | 214 |
| 122 | 14 | 112 | 112 |
| 117 | 24 | 167 | 167 |
| 28  | 4  | 77  | 77  |
| 65  | 8  | 137 | 137 |
| 48  | 7  | 118 | 118 |
| 40  | 7  | 57  | 57  |
| 66  | 16 | 176 | 176 |
| 19  | 4  | 48  | 48  |
| 8   | 3  | 32  | 32  |
| 64  | 15 | 56  | 56  |
| 41  | 7  | 99  | 99  |
| 30  | 4  | 47  | 47  |
| 121 | 17 | 162 | 162 |
| 39  | 13 | 70  | 70  |
| 26  | 4  | 61  | 61  |
| 151 | 20 | 201 | 201 |
| 20  | 3  | 25  | 25  |
| 18  | 3  | 51  | 51  |
| 68  | 11 | 101 | 101 |
| 8   | 4  | 74  | 74  |
| 100 | 16 | 150 | 149 |
| 73  | 9  | 80  | 80  |
| 16  | 3  | 56  | 56  |
| 24  | 5  | 79  | 79  |
| 81  | 12 | 220 | 220 |
| 122 | 28 | 277 | 277 |
| 7   | 3  | 33  | 33  |
| 37  | 5  | 115 | 115 |
| 142 | 16 | 282 | 281 |



VEP annotated somatic variants

|     |    |     |     |
|-----|----|-----|-----|
| 26  | 3  | 89  | 89  |
| 27  | 6  | 61  | 61  |
| 65  | 9  | 169 | 168 |
| 76  | 10 | 185 | 185 |
| 39  | 7  | 34  | 34  |
| 10  | 3  | 42  | 42  |
| 45  | 5  | 98  | 98  |
| 8   | 3  | 26  | 26  |
| 17  | 4  | 58  | 58  |
| 2   | 2  | 18  | 18  |
| 21  | 3  | 45  | 45  |
| 48  | 7  | 27  | 27  |
| 15  | 5  | 83  | 83  |
| 46  | 13 | 77  | 77  |
| 6   | 3  | 94  | 94  |
| 67  | 13 | 211 | 211 |
| 77  | 12 | 159 | 159 |
| 78  | 9  | 194 | 194 |
| 14  | 3  | 61  | 61  |
| 60  | 10 | 127 | 127 |
| 28  | 4  | 55  | 55  |
| 80  | 11 | 113 | 113 |
| 97  | 11 | 180 | 180 |
| 70  | 12 | 113 | 113 |
| 78  | 9  | 110 | 110 |
| 28  | 6  | 41  | 40  |
| 31  | 8  | 137 | 137 |
| 20  | 8  | 63  | 63  |
| 26  | 3  | 32  | 32  |
| 42  | 5  | 128 | 128 |
| 52  | 9  | 69  | 69  |
| 53  | 7  | 90  | 90  |
| 74  | 10 | 123 | 123 |
| 41  | 10 | 118 | 118 |
| 37  | 6  | 77  | 77  |
| 44  | 6  | 59  | 59  |
| 3   | 3  | 49  | 48  |
| 91  | 16 | 189 | 189 |
| 23  | 7  | 85  | 85  |
| 40  | 7  | 126 | 126 |
| 16  | 3  | 35  | 35  |
| 24  | 7  | 35  | 35  |
| 36  | 6  | 92  | 92  |
| 37  | 12 | 72  | 72  |
| 38  | 7  | 89  | 89  |
| 26  | 3  | 30  | 30  |
| 46  | 10 | 124 | 124 |
| 100 | 17 | 126 | 126 |
| 116 | 15 | 221 | 221 |
| 19  | 6  | 61  | 61  |
| 11  | 10 | 49  | 49  |
| 62  | 11 | 68  | 68  |
| 100 | 15 | 92  | 92  |
| 79  | 10 | 81  | 81  |
| 16  | 5  | 64  | 64  |

VEP annotated somatic variants

|     |    |     |     |
|-----|----|-----|-----|
| 64  | 19 | 122 | 122 |
| 151 | 20 | 199 | 199 |
| 85  | 16 | 201 | 201 |
| 40  | 8  | 146 | 146 |
| 61  | 8  | 140 | 140 |
| 109 | 13 | 219 | 219 |
| 27  | 3  | 92  | 92  |
| 37  | 7  | 75  | 75  |
| 25  | 3  | 60  | 60  |
| 102 | 27 | 297 | 297 |
| 85  | 19 | 137 | 137 |
| 30  | 14 | 51  | 51  |
| 75  | 17 | 140 | 140 |
| 112 | 13 | 189 | 189 |
| 113 | 23 | 293 | 293 |
| 16  | 3  | 45  | 45  |
| 96  | 13 | 79  | 79  |
| 9   | 3  | 34  | 34  |
| 52  | 9  | 122 | 122 |
| 78  | 12 | 133 | 133 |
| 32  | 5  | 34  | 34  |
| 39  | 5  | 69  | 69  |
| 53  | 7  | 76  | 76  |
| 214 | 26 | 286 | 285 |
| 37  | 5  | 55  | 55  |
| 81  | 13 | 105 | 105 |
| 142 | 23 | 185 | 185 |
| 52  | 9  | 161 | 159 |
| 104 | 25 | 211 | 211 |
| 68  | 10 | 120 | 120 |
| 14  | 5  | 50  | 50  |
| 53  | 9  | 71  | 71  |
| 34  | 6  | 126 | 126 |
| 77  | 14 | 177 | 177 |
| 116 | 27 | 232 | 232 |
| 106 | 13 | 395 | 394 |
| 10  | 3  | 38  | 38  |
| 47  | 8  | 88  | 88  |
| 6   | 3  | 51  | 51  |

VEP annotated somatic variants

| n_alt_count | all_effects              | Allele     | Gene            |
|-------------|--------------------------|------------|-----------------|
| 0           | AADACL2,intron_variant,  | AA         | ENSG00000197953 |
| 0           | AAED1,intron_variant,,E  | C          | ENSG00000158122 |
| 0           | AASS,intron_variant,,EN  | C          | ENSG00000008311 |
| 0           | ABCA10,synonymous_var    | G          | ENSG00000154263 |
| 0           | ABCA3,3_prime_UTR_var    | T          | ENSG00000167972 |
| 0           | ABCA6,intron_variant,,E  | G          | ENSG00000154262 |
| 0           | ABCA6,intron_variant,,E  | G          | ENSG00000154262 |
| 0           | ABCA9,intron_variant,,E  | G          | ENSG00000154258 |
| 0           | ABCC1,synonymous_var     | A          | ENSG00000103222 |
| 1           | ABCC6,intron_variant,,E  | -          | ENSG00000091262 |
| 0           | ABCC8,synonymous_var     | T          | ENSG00000006071 |
| 0           | ABHD3,5_prime_UTR_var    | GAGCGGGCGA | ENSG00000158201 |
| 0           | ABR,splice_region_vari   | A          | ENSG00000159842 |
| 1           | AC005013.5,upstream_g    | C          | ENSG00000228421 |
| 0           | AC026202.1,missense_v    | T          | ENSG00000268509 |
| 0           | ACAD8,intron_variant,,E  | A          | ENSG00000151498 |
| 0           | ACADM,intron_variant,,E  | G          | ENSG00000117054 |
| 0           | ACADSB,intron_variant,,l | T          | ENSG00000196177 |
| 0           | ACBD3,intron_variant,,E  | C          | ENSG00000182827 |
| 0           | ACER1,5_prime_UTR_var    | A          | ENSG00000167769 |
| 0           | ACP2,3_prime_UTR_var     | A          | ENSG00000134575 |
| 0           | ACPL2,splice_region_var  | A          | ENSG00000155893 |
| 0           | ACSBG1,intron_variant,,l | A          | ENSG00000103740 |
| 0           | ACSF3,intron_variant,,E  | T          | ENSG00000176715 |
| 0           | ACSM4,intron_variant,,E  | T          | ENSG00000215009 |
| 0           | ACVR2B,splice_region_v   | A          | ENSG00000114739 |
| 0           | ADAM15,missense_varia    | T          | ENSG00000143537 |
| 0           | ADAM17,intron_variant,,f | ATAA       | ENSG00000151694 |
| 0           | ADAMTS14,missense_var    | A          | ENSG00000138316 |
| 0           | ADAMTS2,intron_variant   | G          | ENSG00000087116 |
| 1           | ADAMTS20,intron_variar   | -          | ENSG00000173157 |
| 0           | ADAMTS4,intron_variant   | T          | ENSG00000158859 |
| 0           | ADAMTS6,intron_variant   | G          | ENSG00000049192 |
| 1           | ADAMTSL1,intron_variar   | G          | ENSG00000178031 |
| 0           | ADORA1,intron_variant,,l | -          | ENSG00000163485 |
| 0           | ADORA3,5_prime_UTR_      | G          | ENSG00000121933 |
| 0           | AFAP1L2,synonymous_v     | C          | ENSG00000169129 |
| 0           | AFF1,intron_variant,,EN  | C          | ENSG00000172493 |
| 0           | AFF2,intron_variant,,EN  | A          | ENSG00000155966 |
| 0           | AGAP3,intron_variant,,E  | G          | ENSG00000133612 |
| 0           | AGBL3,intron_variant,,E  | C          | ENSG00000146856 |
| 2           | AGTR1,synonymous_var     | T          | ENSG00000144891 |
| 0           | AHI1,intron_variant,,ENS | C          | ENSG00000135541 |
| 0           | AHSP,intron_variant,,EN  | A          | ENSG00000169877 |
| 0           | AIG1,synonymous_variar   | C          | ENSG00000146416 |
| 0           | AIM1L,intron_variant,,EN | T          | ENSG00000176092 |
| 0           | AIM1L,intron_variant,,EN | T          | ENSG00000176092 |
| 0           | AIPL1,missense_variant,  | T          | ENSG00000129221 |
| 2           | AIRE,synonymous_variar   | T          | ENSG00000160224 |
| 0           | AIRE,intron_variant,,ENS | C          | ENSG00000160224 |
| 0           | AKAP9,splice_region_var  | T          | ENSG00000127914 |
| 0           | AKAP9,intron_variant,,E  | G          | ENSG00000127914 |
| 0           | AKR1B10,intron_variant,, | T          | ENSG00000198074 |
| 0           | ALB,intron_variant,,ENS  | A          | ENSG00000163631 |

VEP annotated somatic variants

|   |                          |   |                 |
|---|--------------------------|---|-----------------|
| 0 | ALDH16A1,intron_varian   | A | ENSG00000161618 |
| 0 | ALDH1A3,intron_variant,  | A | ENSG00000184254 |
| 0 | ALOX5,intron_variant,,E  | T | ENSG00000012779 |
| 0 | ALPK3,5_prime_UTR_va     | C | ENSG00000136383 |
| 0 | ALPK3,intron_variant,,E  | T | ENSG00000136383 |
| 0 | AMICA1,intron_variant,,E | C | ENSG00000160593 |
| 0 | AMICA1,intron_variant,,E | G | ENSG00000160593 |
| 0 | ANAPC1,synonymous_va     | T | ENSG00000153107 |
| 1 | ANK1,intron_variant,,EN  | G | ENSG00000029534 |
| 0 | ANKAR,intron_variant,,E  | - | ENSG00000151687 |
| 0 | ANKK1,intron_variant,,E  | A | ENSG00000170209 |
| 0 | ANKLE2,intron_variant,,E | A | ENSG00000176915 |
| 0 | ANKRD18B,missense_va     | C | ENSG00000230453 |
| 0 | ANKRD26,intron_variant,  | C | ENSG00000107890 |
| 0 | ANKRD28,splice_region_   | G | ENSG00000206560 |
| 0 | ANKRD35,synonymous_      | A | ENSG00000198483 |
| 0 | ANKRD52,intron_variant,  | T | ENSG00000139645 |
| 0 | ANKRD55,intron_variant,  | T | ENSG00000164512 |
| 0 | AOX1,intron_variant,,EN  | A | ENSG00000138356 |
| 0 | AP002884.2,5_prime_UT    | T | ENSG00000268472 |
| 0 | AP1B1,intron_variant,,E  | C | ENSG00000100280 |
| 0 | AP2A1,intron_variant,,E  | C | ENSG00000196961 |
| 0 | AP4E1,intron_variant,,E  | T | ENSG00000081014 |
| 0 | AP4E1,missense_variant   | A | ENSG00000081014 |
| 0 | APBB1IP,intron_variant,, | T | ENSG00000077420 |
| 0 | APOOL,intron_variant,,E  | T | ENSG00000155008 |
| 0 | AQP12A,missense_varia    | G | ENSG00000184945 |
| 1 | AQP12A,5_prime_UTR_      | G | ENSG00000184945 |
| 0 | AQP4,intron_variant,,EN  | G | ENSG00000171885 |
| 0 | AQPEP,missense_varian    | T | ENSG00000172901 |
| 0 | ARF3,intron_variant,,EN  | - | ENSG00000134287 |
| 0 | ARHGAP10,missense_va     | G | ENSG00000071205 |
| 0 | ARHGAP19-SLIT1,intron    | G | ENSG00000269891 |
| 0 | ARHGAP36,intron_variar   | C | ENSG00000147256 |
| 0 | ARHGAP4,synonymous_      | T | ENSG00000089820 |
| 0 | ARHGEF11,intron_variar   | T | ENSG00000132694 |
| 1 | ARHGEF16,5_prime_UT      | A | ENSG00000130762 |
| 0 | ARHGEF2,intron_variant   | G | ENSG00000116584 |
| 0 | ARHGEF3,missense_var     | C | ENSG00000163947 |
| 0 | ARHGEF7,synonymous_      | C | ENSG00000102606 |
| 0 | ARID3C,intron_variant,,E | G | ENSG00000205143 |
| 0 | ARL5B,splice_region_va   | A | ENSG00000165997 |
| 0 | ARMC8,intron_variant,,E  | T | ENSG00000114098 |
| 0 | ARMCX4,5_prime_UTR_      | T | ENSG00000196440 |
| 0 | ARMCX4,missense_varia    | G | ENSG00000196440 |
| 0 | ARMCX4,upstream_gene     | A | ENSG00000196440 |
| 0 | ARMCX4,synonymous_v      | T | ENSG00000196440 |
| 0 | ARRB2,intron_variant,,E  | G | ENSG00000141480 |
| 0 | ARRDC2,intron_variant,,l | A | ENSG00000105643 |
| 0 | ARRDC2,missense_varia    | A | ENSG00000105643 |
| 0 | ARSA,missense_variant,   | A | ENSG00000100299 |
| 0 | ARVCF,intron_variant,,E  | G | ENSG00000099889 |
| 1 | ASB10,intron_variant,,E  | T | ENSG00000146926 |
| 0 | ASB14,intron_variant,,E  | G | ENSG00000239388 |
| 0 | ASB4,intron_variant,,EN  | - | ENSG00000005981 |

VEP annotated somatic variants

|   |                           |   |                 |
|---|---------------------------|---|-----------------|
| 0 | ASB6,5_prime_UTR_vari     | T | ENSG00000148331 |
| 0 | ASIC4,intron_variant,,EN  | A | ENSG00000072182 |
| 0 | ASPSCR1,intron_variant,   | T | ENSG00000169696 |
| 0 | ASTL,intron_variant,,ENS  | A | ENSG00000188886 |
| 0 | ASTL,intron_variant,,ENS  | G | ENSG00000188886 |
| 0 | ASTN2,5_prime_UTR_va      | C | ENSG00000148219 |
| 1 | ASXL3,intron_variant,,EM  | A | ENSG00000141431 |
| 0 | ASZ1,intron_variant,,ENS  | T | ENSG00000154438 |
| 0 | ATG4C,intron_variant,,EI  | G | ENSG00000125703 |
| 0 | ATL1,intron_variant,,ENS  | C | ENSG00000198513 |
| 0 | ATP11A,3_prime_UTR_\v     | A | ENSG00000068650 |
| 0 | ATP13A2,synonymous_v      | A | ENSG00000159363 |
| 0 | ATP1A2,synonymous_va      | T | ENSG00000018625 |
| 0 | ATP1A4,intron_variant,,E  | G | ENSG00000132681 |
| 1 | ATP2C2,intron_variant,,E  | G | ENSG00000064270 |
| 0 | ATP5C1,intron_variant,,E  | T | ENSG00000165629 |
| 0 | ATP7A,intron_variant,,EM  | A | ENSG00000165240 |
| 0 | ATP8B1,intron_variant,,E  | A | ENSG00000081923 |
| 0 | ATP9A,intron_variant,,EM  | A | ENSG00000054793 |
| 0 | ATP9A,intron_variant,,EM  | A | ENSG00000054793 |
| 0 | ATRIP,intron_variant,,EN  | G | ENSG00000164053 |
| 0 | ATXN2L,intron_variant,,E  | T | ENSG00000168488 |
| 0 | AWAT1,intron_variant,,E   | T | ENSG00000204195 |
| 0 | AWAT2,splice_region_va    | G | ENSG00000147160 |
| 0 | AXDND1,missense_varia     | C | ENSG00000162779 |
| 0 | AXIN1,intron_variant,,EN  | C | ENSG00000103126 |
| 0 | B3GNT3,missense_varia     | A | ENSG00000179913 |
| 0 | BAIAP2,intron_variant,,EI | T | ENSG00000175866 |
| 0 | BAIAP3,intron_variant,,EI | A | ENSG00000007516 |
| 0 | BBS12,missense_variant    | A | ENSG00000181004 |
| 0 | BCKDHA,5_prime_UTR_\v     | G | ENSG00000248098 |
| 0 | BCL7B,intron_variant,,EM  | C | ENSG00000106635 |
| 0 | BCORL1,intron_variant,,I  | T | ENSG00000085185 |
| 0 | BEST1,intron_variant,,EM  | T | ENSG00000167995 |
| 0 | BICD1,splice_donor_vari   | A | ENSG00000151746 |
| 0 | BLNK,intron_variant,,ENS  | A | ENSG00000095585 |
| 0 | BMP15,missense_varian     | G | ENSG00000130385 |
| 1 | BNC1,intron_variant,,ENS  | G | ENSG00000169594 |
| 0 | BPIFB2,intron_variant,,EI | A | ENSG00000078898 |
| 0 | BPTF,intron_variant,,ENS  | T | ENSG00000171634 |
| 1 | BRCA1,intron_variant,,EI  | T | ENSG00000012048 |
| 0 | BRCA1,intron_variant,,EI  | T | ENSG00000012048 |
| 0 | BRCA1,intron_variant,,EI  | C | ENSG00000012048 |
| 0 | BRCA2,intron_variant,,EI  | T | ENSG00000139618 |
| 0 | BRD9,intron_variant,,ENS  | T | ENSG00000028310 |
| 1 | BRWD1,synonymous_va       | A | ENSG00000185658 |
| 0 | BSDC1,3_prime_UTR_\v      | G | ENSG00000160058 |
| 0 | BSG,intron_variant,,ENS   | C | ENSG00000172270 |
| 0 | BSG,intron_variant,,ENS   | T | ENSG00000172270 |
| 0 | BTBD16,intron_variant,,E  | T | ENSG00000138152 |
| 0 | BTBD16,missense_varia     | A | ENSG00000138152 |
| 0 | BTBD8,intron_variant,,EM  | A | ENSG00000189195 |
| 0 | BTG1,intron_variant,,ENS  | T | ENSG00000133639 |
| 0 | BTNL9,synonymous_vari     | T | ENSG00000165810 |
| 0 | BZRAP1,intron_variant,,E  | G | ENSG00000005379 |

VEP annotated somatic variants

|   |                                          |   |                 |
|---|------------------------------------------|---|-----------------|
| 0 | CDH23,intron_variant,,ENTGTAGACCATGACTTT |   | ENSG00000214688 |
| 0 | C10orf71,synonymous_v                    | C | ENSG00000177354 |
| 0 | C10orf90,intron_variant,,l               | A | ENSG00000154493 |
| 0 | C11orf49,3_prime_UTR_                    | A | ENSG00000149179 |
| 0 | C12orf49,missense_varia                  | C | ENSG00000111412 |
| 0 | C12orf55,intron_variant,,l               | T | ENSG00000188596 |
| 0 | C12orf60,frameshift_vari                 | - | ENSG00000182993 |
| 0 | C14orf164,intron_variant.                | - | ENSG00000215277 |
| 0 | C17orf107,downstream_                    | A | ENSG00000205710 |
| 0 | C17orf53,3_prime_UTR_                    | C | ENSG00000125319 |
| 0 | C19orf26,missense_varia                  | C | ENSG00000099625 |
| 0 | C19orf33,5_prime_UTR_                    | C | ENSG00000167644 |
| 0 | C1GALT1C1,missense_                      | T | ENSG00000171155 |
| 0 | C1orf101,synonymous_v                    | G | ENSG00000179397 |
| 0 | C1orf141,intron_variant,,l               | - | ENSG00000203963 |
| 0 | C1orf168,intron_variant,,l               | C | ENSG00000187889 |
| 0 | C1orf173,splice_region_                  | C | ENSG00000178965 |
| 0 | C1QTNF1,intron_variant,                  | C | ENSG00000173918 |
| 0 | C2orf54,3_prime_UTR_v                    | C | ENSG00000172478 |
| 0 | C2orf81,5_prime_UTR_v                    | A | ENSG00000159239 |
| 0 | C3,intron_variant,,ENSTC                 | T | ENSG00000125730 |
| 0 | C4orf29,intron_variant,,E                | A | ENSG00000164074 |
| 0 | C5,intron_variant,,ENSTC                 | G | ENSG00000106804 |
| 0 | C5,intron_variant,,ENSTC                 | C | ENSG00000106804 |
| 0 | C6orf201,missense_varia                  | C | ENSG00000185689 |
| 0 | C7,intron_variant,,ENSTC                 | T | ENSG00000112936 |
| 0 | CA10,intron_variant,,ENS                 | G | ENSG00000154975 |
| 0 | CA5A,synonymous_varia                    | A | ENSG00000174990 |
| 0 | CABIN1,missense_variar                   | T | ENSG00000099991 |
| 0 | CACNA1A,intron_variant                   | - | ENSG00000141837 |
| 0 | CACNA1B,splice_region_                   | C | ENSG00000148408 |
| 0 | CACNA1C,intron_variant                   | T | ENSG00000151067 |
| 0 | CACNA2D2,intron_variar                   | A | ENSG00000007402 |
| 0 | CACNA2D2,intron_variar                   | G | ENSG00000007402 |
| 0 | CACNB2,intron_variant,,l                 | C | ENSG00000165995 |
| 0 | CAGE1,intron_variant,,El                 | C | ENSG00000164304 |
| 1 | CALD1,intron_variant,,EM                 | T | ENSG00000122786 |
| 0 | CALR,5_prime_UTR_var                     | A | ENSG00000179218 |
| 0 | CAMK1D,3_prime_UTR_                      | A | ENSG00000183049 |
| 0 | CAMK2D,intron_variant,,                  | A | ENSG00000145349 |
| 0 | CAMKMT,intron_variant,,                  | T | ENSG00000143919 |
| 0 | CAMSAP3,synonymous_                      | T | ENSG00000076826 |
| 0 | CAPN11,intron_variant,,E                 | T | ENSG00000137225 |
| 0 | CAPN9,intron_variant,,El                 | T | ENSG00000135773 |
| 0 | CAPS,intron_variant,,EN                  | T | ENSG00000105519 |
| 0 | CARD10,intron_variant,,E                 | C | ENSG00000100065 |
| 0 | CARD8,intron_variant,,El                 | A | ENSG00000105483 |
| 0 | CASP14,3_prime_UTR_                      | T | ENSG00000105141 |
| 0 | CASQ1,intron_variant,,El                 | C | ENSG00000143318 |
| 0 | CASZ1,intron_variant,,EM                 | A | ENSG00000130940 |
| 0 | CATSPERG,intron_varia                    | G | ENSG00000099338 |
| 0 | CAV3,synonymous_varia                    | T | ENSG00000182533 |
| 0 | CCDC102A,synonymous                      | T | ENSG00000135736 |
| 1 | CCDC104,intron_variant,                  | - | ENSG00000163001 |
| 0 | CCDC105,missense_vari                    | A | ENSG00000160994 |

VEP annotated somatic variants

|   |                          |     |                 |
|---|--------------------------|-----|-----------------|
| 0 | CCDC11,intron_variant,,f | A   | ENSG00000172361 |
| 0 | CCDC120,3_prime_UTR      | A   | ENSG00000147144 |
| 0 | CCDC132,3_prime_UTR      | G   | ENSG00000004766 |
| 0 | CCDC137,intron_variant,  | C   | ENSG00000185298 |
| 0 | CCDC147,synonymous_v     | G   | ENSG00000120051 |
| 0 | CCDC158,missense_vari    | A   | ENSG00000163749 |
| 0 | CCDC169-SOHLH2,intro     | T   | ENSG00000250709 |
| 0 | CCDC18,intron_variant,,f | A   | ENSG00000122483 |
| 0 | CCDC57,synonymous_va     | A   | ENSG00000176155 |
| 0 | CCDC6,intron_variant,,El | T   | ENSG00000108091 |
| 0 | CCDC81,intron_variant,,f | A   | ENSG00000149201 |
| 0 | CCL19,intron_variant,,EM | T   | ENSG00000172724 |
| 1 | CCR2,synonymous_varia    | A   | ENSG00000121807 |
| 0 | CD109,missense_variant   | G   | ENSG00000156535 |
| 0 | CD200R1L,frameshift_va   | -   | ENSG00000206531 |
| 0 | CD244,intron_variant,,EM | G   | ENSG00000122223 |
| 0 | CD300A,intron_variant,,E | -   | ENSG00000167851 |
| 0 | CD3EAP,missense_varia    | C   | ENSG00000117877 |
| 0 | CD46,intron_variant,,ENS | G   | ENSG00000117335 |
| 0 | CD7,inframe_deletion,p./ | -   | ENSG00000173762 |
| 0 | CDC23,upstream_gene_     | A   | ENSG00000094880 |
| 0 | CDC42BPG,intron_variar   | C   | ENSG00000171219 |
| 0 | CDC45,intron_variant,,El | T   | ENSG00000093009 |
| 0 | CDCP1,missense_varian    | C   | ENSG00000163814 |
| 0 | CDH18,intron_variant,,El | T   | ENSG00000145526 |
| 0 | CDK19,intron_variant,,EM | C   | ENSG00000155111 |
| 0 | CDK3,intron_variant,,ENS | A   | ENSG00000250506 |
| 0 | CDK7,intron_variant,,ENS | T   | ENSG00000134058 |
| 0 | CDKAL1,synonymous_va     | G   | ENSG00000145996 |
| 0 | CDKL5,intron_variant,,EM | A   | ENSG00000008086 |
| 0 | CDS2,intron_variant,,ENS | A   | ENSG00000101290 |
| 0 | CDSN,intron_variant,,EN  | A   | ENSG00000204539 |
| 0 | CDSN,5_prime_UTR_vari    | G   | ENSG00000204539 |
| 0 | CEACAM21,intron_variar   | A   | ENSG00000007129 |
| 0 | CEACAM3,intron_variant   | AAG | ENSG00000170956 |
| 0 | CECR1,intron_variant,,El | T   | ENSG00000093072 |
| 0 | CECR2,intron_variant,,El | C   | ENSG00000099954 |
| 0 | CECR2,missense_varian    | A   | ENSG00000099954 |
| 0 | CECR5,intron_variant,,El | C   | ENSG00000069998 |
| 1 | CECR6,synonymous_var     | C   | ENSG00000183307 |
| 0 | CENPI,intron_variant,,EM | -   | ENSG00000102384 |
| 0 | CENPW,missense_varia     | T   | ENSG00000203760 |
| 0 | CEP250,intron_variant,,E | T   | ENSG00000126001 |
| 1 | CEP250,intron_variant,,E | A   | ENSG00000126001 |
| 0 | CEP63,intron_variant,,EM | C   | ENSG00000182923 |
| 0 | CEP63,intron_variant,,EM | T   | ENSG00000182923 |
| 0 | CEP70,missense_variant   | T   | ENSG00000114107 |
| 0 | CEP95,intron_variant,,EM | T   | ENSG00000258890 |
| 0 | CERCAM,intron_variant,,  | G   | ENSG00000167123 |
| 0 | CES2,intron_variant,,ENS | A   | ENSG00000172831 |
| 0 | CFH,missense_variant,p.  | T   | ENSG00000000971 |
| 0 | CFTR,synonymous_varia    | A   | ENSG00000001626 |
| 0 | CGB7,5_prime_UTR_var     | C   | ENSG00000196337 |
| 1 | CHD1L,synonymous_var     | C   | ENSG00000131778 |
| 1 | CHFR,intron_variant,,EN  | A   | ENSG00000072609 |

VEP annotated somatic variants

|   |                                          |   |                 |
|---|------------------------------------------|---|-----------------|
| 0 | CHFR,intron_variant,,EN                  | C | ENSG00000072609 |
| 0 | CHI3L2,missense_varian                   | T | ENSG00000064886 |
| 1 | CHRNA1,3_prime_UTR_                      | C | ENSG00000170175 |
| 0 | CHST14,3_prime_UTR_                      | A | ENSG00000169105 |
| 0 | CIITA,intron_variant,,EN                 | T | ENSG00000179583 |
| 0 | CINP,synonymous_varia                    | A | ENSG00000100865 |
| 0 | CIT,intron_variant,,EN                   | T | ENSG00000122966 |
| 0 | CITED1,missense_variar                   | C | ENSG00000125931 |
| 0 | CKMT2,intron_variant,,E                  | C | ENSG00000131730 |
| 0 | CLCN6,intron_variant,,E                  | A | ENSG00000011021 |
| 0 | CLCNKA,intron_variant,,                  | A | ENSG00000186510 |
| 0 | CLDN15,3_prime_UTR_                      | T | ENSG00000106404 |
| 0 | CLEC4E,5_prime_UTR_                      | C | ENSG00000166523 |
| 0 | CLIC2,3_prime_UTR_val                    | G | ENSG00000155962 |
| 0 | CLIC4,splice_acceptor_v                  | T | ENSG00000169504 |
| 0 | CLIP1,intron_variant,,EN                 | T | ENSG00000130779 |
| 0 | CLIP4,intron_variant,,EN                 | A | ENSG00000115295 |
| 0 | CNCSR2,intron_variant,,                  | C | ENSG00000149970 |
| 1 | CNNM1,intron_variant,,E                  | A | ENSG00000119946 |
| 0 | CNOT1,synonymous_var                     | A | ENSG00000125107 |
| 0 | CNOT11,intron_variant,,                  | G | ENSG00000158435 |
| 0 | CNR1,synonymous_varia                    | T | ENSG00000118432 |
| 0 | CNTN4,intron_variant,,E                  | A | ENSG00000144619 |
| 0 | CNTNAP2,intron_variant.                  | C | ENSG00000174469 |
| 0 | CNTNAP2,splice_region_                   | G | ENSG00000174469 |
| 0 | CNTRL,intron_variant,,E                  | G | ENSG00000119397 |
| 0 | COBL,synonymous_varia                    | T | ENSG00000106078 |
| 0 | COG4,intron_variant,,EN                  | G | ENSG00000103051 |
| 0 | COG5,intron_variant,,EN                  | G | ENSG00000164597 |
| 0 | COL17A1,intron_variant,,AATGGAGACAATGTTG |   | ENSG00000065618 |
| 0 | COL23A1,intron_variant,,                 | A | ENSG00000050767 |
| 0 | COL24A1,intron_variant,,                 | C | ENSG00000171502 |
| 0 | COL24A1,intron_variant,,                 | A | ENSG00000171502 |
| 0 | COL26A1,missense_vari                    | A | ENSG00000160963 |
| 1 | COL4A6,intron_variant,,E                 | C | ENSG00000197565 |
| 0 | COL5A3,intron_variant,,E                 | T | ENSG00000080573 |
| 0 | COL6A1,intron_variant,,E                 | C | ENSG00000142156 |
| 0 | COL6A3,intron_variant,,E                 | - | ENSG00000163359 |
| 0 | COMT,synonymous_varia                    | G | ENSG00000093010 |
| 0 | COX20,intron_variant,,E                  | G | ENSG00000203667 |
| 0 | CP,intron_variant,,EN                    | C | ENSG00000047457 |
| 0 | CPEB1,5_prime_UTR_va                     | T | ENSG00000214575 |
| 0 | CPEB4,3_prime_UTR_va                     | A | ENSG00000113742 |
| 0 | CR2,missense_variant,p.                  | G | ENSG00000117322 |
| 0 | CRB2,intron_variant,,EN                  | A | ENSG00000148204 |
| 0 | CRHR2,intron_variant,,E                  | G | ENSG00000106113 |
| 0 | CRIM1,intron_variant,,EN                 | A | ENSG00000150938 |
| 0 | CRIM1,intron_variant,,EN                 | A | ENSG00000150938 |
| 0 | CRISP3,synonymous_va                     | T | ENSG00000096006 |
| 0 | CRNKL1,intron_variant,,E TTGGGCATTGTCTGT |   | ENSG00000101343 |
| 0 | CRTC3,intron_variant,,E                  | T | ENSG00000140577 |
| 0 | CRYBG3,intron_variant,,                  | C | ENSG00000080200 |
| 0 | CRYBG3,5_prime_UTR_                      | T | ENSG00000233280 |
| 0 | CSAG1,5_prime_UTR_va                     | A | ENSG00000198930 |
| 0 | CSNK2A1,intron_variant,                  | T | ENSG00000101266 |



VEP annotated somatic variants

|   |                          |    |                 |
|---|--------------------------|----|-----------------|
| 0 | CSPG4,synonymous_var     | G  | ENSG00000173546 |
| 0 | CTCF,5_prime_UTR_va      | A  | ENSG00000124092 |
| 0 | CTD-3088G3.8,synonym     | T  | ENSG00000188897 |
| 0 | CTNNA3,intron_variant,,I | C  | ENSG00000183230 |
| 0 | CTNNAL1,synonymous_      | T  | ENSG00000119326 |
| 0 | CUBN,synonymous_varia    | A  | ENSG00000107611 |
| 0 | CUL2,intron_variant,,ENS | G  | ENSG00000108094 |
| 1 | CUL7,missense_variant,,I | G  | ENSG00000044090 |
| 0 | CUX1,intron_variant,,ENS | G  | ENSG00000257923 |
| 0 | CUX1,missense_variant,,I | A  | ENSG00000257923 |
| 1 | CWC22,intron_variant,,E  | T  | ENSG00000163510 |
| 0 | CWC22,synonymous_var     | T  | ENSG00000163510 |
| 0 | CWF19L2,missense_vari    | A  | ENSG00000152404 |
| 0 | CXCR3,5_prime_UTR_va     | T  | ENSG00000186810 |
| 0 | CYB561A3,3_prime_UTF     | A  | ENSG00000162144 |
| 0 | CYB5R2,intron_variant,,E | A  | ENSG00000166394 |
| 0 | CYP2A13,intron_variant,, | G  | ENSG00000197838 |
| 0 | CYP2A13,intron_variant,, | T  | ENSG00000197838 |
| 0 | CYP3A4,intron_variant,,E | -  | ENSG00000160868 |
| 0 | CYP4F12,missense_vari    | T  | ENSG00000186204 |
| 0 | CYP51A1,intron_variant,, | A  | ENSG00000001630 |
| 0 | DAGLA,synonymous_var     | A  | ENSG00000134780 |
| 0 | DARS,intron_variant,,EN  | C  | ENSG00000115866 |
| 0 | DBR1,intron_variant,,EN  | G  | ENSG00000138231 |
| 0 | DCAF15,intron_variant,,E | C  | ENSG00000132017 |
| 0 | DCAF15,synonymous_va     | C  | ENSG00000132017 |
| 0 | DCAF15,intron_variant,,E | A  | ENSG00000132017 |
| 0 | DCC,intron_variant,,ENS  | G  | ENSG00000187323 |
| 0 | DCDC2,synonymous_var     | A  | ENSG00000146038 |
| 0 | DCHS2,5_prime_UTR_va     | G  | ENSG00000197410 |
| 0 | DCTD,synonymous_varia    | G  | ENSG00000129187 |
| 0 | DDX11,intron_variant,,EM | C  | ENSG00000013573 |
| 0 | DDX11,intron_variant,,EM | C  | ENSG00000013573 |
| 0 | DDX59,intron_variant,,EM | T  | ENSG00000118197 |
| 0 | DENND1A,intron_variant   | C  | ENSG00000119522 |
| 0 | DENND5A,missense_var     | G  | ENSG00000184014 |
| 0 | DEPDC1B,intron_variant   | C  | ENSG00000035499 |
| 0 | DGCR2,intron_variant,,E  | A  | ENSG00000070413 |
| 0 | DGKB,intron_variant,,EN  | A  | ENSG00000136267 |
| 0 | DHRS3,intron_variant,,EI | T  | ENSG00000162496 |
| 0 | DHX32,intron_variant,,EM | TG | ENSG00000089876 |
| 0 | DHX37,intron_variant,,EM | T  | ENSG00000150990 |
| 0 | DHX8,synonymous_varia    | C  | ENSG00000067596 |
| 0 | DHX8,intron_variant,,EN  | G  | ENSG00000067596 |
| 0 | DHX8,intron_variant,,EN  | A  | ENSG00000067596 |
| 0 | DIAPH1,intron_variant,,E | C  | ENSG00000131504 |
| 0 | DIP2B,intron_variant,,EN | A  | ENSG00000066084 |
| 0 | DIS3L,3_prime_UTR_va     | -  | ENSG00000166938 |
| 0 | DISC1,3_prime_UTR_va     | G  | ENSG00000162946 |
| 0 | DISC1,3_prime_UTR_va     | T  | ENSG00000162946 |
| 0 | DKK4,intron_variant,,EN  | A  | ENSG00000104371 |
| 0 | DLG2,3_prime_UTR_var     | G  | ENSG00000150672 |
| 0 | DLG3,missense_variant,,I | G  | ENSG00000082458 |
| 0 | DLG5,intron_variant,,EN  | T  | ENSG00000151208 |
| 0 | DLK2,intron_variant,,ENS | T  | ENSG00000171462 |

VEP annotated somatic variants

|   |                          |                 |                 |
|---|--------------------------|-----------------|-----------------|
| 0 | DMKN,intron_variant,,EN  | T               | ENSG00000161249 |
| 0 | DNA2,intron_variant,,EN  | G               | ENSG00000138346 |
| 0 | DNAH11,intron_variant,,E | C               | ENSG00000105877 |
| 0 | DNAH12,intron_variant,,E | G               | ENSG00000174844 |
| 0 | DNAH14,intron_variant,,E | T               | ENSG00000185842 |
| 0 | DNAH14,intron_variant,,E | G               | ENSG00000185842 |
| 0 | DNAH14,intron_variant,,E | G               | ENSG00000185842 |
| 0 | DNAH14,intron_variant,,E | G               | ENSG00000185842 |
| 0 | DNAH14,intron_variant,,E | G               | ENSG00000185842 |
| 0 | DNAH17,intron_variant,,E | T               | ENSG00000187775 |
| 0 | DNAH8,intron_variant,,E  | C               | ENSG00000124721 |
| 0 | DNAH9,intron_variant,,E  | C               | ENSG00000007174 |
| 0 | DNALI1,splice_region_va  | C               | ENSG00000163879 |
| 0 | DNASE2B,intron_variant,  | A               | ENSG00000137976 |
| 0 | DNMBP,intron_variant,,E  | -               | ENSG00000107554 |
| 0 | DOCK2,intron_variant,,E  | G               | ENSG00000134516 |
| 1 | DOCK3,intron_variant,,E  | T               | ENSG00000088538 |
| 0 | DOT1L,synonymous_var     | A               | ENSG00000104885 |
| 0 | DPEP1,missense_varian    | C               | ENSG00000015413 |
| 1 | DPF1,intron_variant,,EN  | C               | ENSG00000011332 |
| 1 | DPH5,intron_variant,,EN  | G               | ENSG00000117543 |
| 0 | DPY19L2,splice_region_   | T               | ENSG00000177990 |
| 0 | DRAXIN,splice_region_v   | A               | ENSG00000162490 |
| 0 | DRP2,intron_variant,,EN  | T               | ENSG00000102385 |
| 0 | DRP2,intron_variant,,EN  | C               | ENSG00000102385 |
| 0 | DRP2,intron_variant,,EN  | A               | ENSG00000102385 |
| 0 | DSCAML1,intron_variant   | A               | ENSG00000177103 |
| 0 | DSG3,intron_variant,,EN  | -               | ENSG00000134757 |
| 0 | DSG4,synonymous_varia    | A               | ENSG00000175065 |
| 0 | DSG4,synonymous_varia    | T               | ENSG00000175065 |
| 0 | DSP,intron_variant,,EN   | T               | ENSG00000096696 |
| 0 | DST,intron_variant,,EN   | G               | ENSG00000151914 |
| 0 | DTD2,intron_variant,,EN  | A               | ENSG00000129480 |
| 0 | DTNBP1,intron_variant,,E | C               | ENSG00000047579 |
| 0 | DTWD2,intron_variant,,E  | C               | ENSG00000169570 |
| 0 | DTX2,synonymous_varia    | A               | ENSG00000091073 |
| 0 | DUSP18,5_prime_UTR_      | C               | ENSG00000167065 |
| 0 | DUSP6,missense_varian    | C               | ENSG00000139318 |
| 0 | DYNC111,intron_variant,, | A               | ENSG00000158560 |
| 0 | DYNC2H1,intron_variant,  | C               | ENSG00000187240 |
| 0 | EBNA1BP2,5_prime_UTI     | G               | ENSG00000117395 |
| 0 | EBP,missense_variant,p.  | T               | ENSG00000147155 |
| 0 | ECE1,missense_variant,j  | A               | ENSG00000117298 |
| 0 | ECEL1,intron_variant,,EN | G               | ENSG00000171551 |
| 0 | ECT2,intron_variant,,EN  | A               | ENSG00000114346 |
| 0 | ECT2L,intron_variant,,EN | T               | ENSG00000203734 |
| 0 | EDEM3,intron_variant,,E  | A               | ENSG00000116406 |
| 0 | EDN1,intron_variant,,EN  | T               | ENSG00000078401 |
| 0 | EDNRB,intron_variant,,E  | T               | ENSG00000136160 |
| 0 | EEA1,intron_variant,,EN  | T               | ENSG00000102189 |
| 0 | EEF1A2,intron_variant,,E | C               | ENSG00000101210 |
| 0 | EEF1E1,intron_variant,,E | GGGGTGGGAATCACC | ENSG00000124802 |
| 0 | EFCAB13,intron_variant,  | G               | ENSG00000178852 |
| 0 | EFCAB3,intron_variant,,E | -               | ENSG00000172421 |
| 0 | EFCAB4B,intron_variant,  | A               | ENSG00000130038 |

VEP annotated somatic variants

|   |                                    |    |                 |
|---|------------------------------------|----|-----------------|
| 0 | EFHB,synonymous_varia              | T  | ENSG00000163576 |
| 0 | EFTUD1,intron_variant,,E           | T  | ENSG00000140598 |
| 0 | EFTUD2,intron_variant,,E           | G  | ENSG00000108883 |
| 0 | EIF2S3,synonymous_var              | T  | ENSG00000130741 |
| 0 | ELF4,synonymous_varia              | T  | ENSG00000102034 |
| 0 | ELFN2,synonymous_vari              | A  | ENSG00000166897 |
| 0 | ELFN2,synonymous_vari              | T  | ENSG00000166897 |
| 0 | ELFN2,synonymous_vari              | G  | ENSG00000166897 |
| 0 | ELN,intron_variant,,ENS            | T  | ENSG00000049540 |
| 0 | ELOVL2,splice_region_v             | A  | ENSG00000197977 |
| 0 | EMC1,missense_variant,             | G  | ENSG00000127463 |
| 0 | EMC2,intron_variant,,EN            | T  | ENSG00000104412 |
| 0 | EMC2,intron_variant,,EN            | G  | ENSG00000104412 |
| 0 | EML1,missense_variant,,j           | C  | ENSG00000066629 |
| 0 | EML1,intron_variant,,ENS           | C  | ENSG00000066629 |
| 0 | EML1,intron_variant,,ENS           | G  | ENSG00000066629 |
| 0 | EN1,synonymous_varian              | T  | ENSG00000163064 |
| 2 | ENG,intron_variant,,ENS            | G  | ENSG00000106991 |
| 0 | ENOX1,intron_variant,,El           | T  | ENSG00000120658 |
| 0 | ENTPD1,intron_variant,,E           | C  | ENSG00000138185 |
| 0 | ENTPD5,intron_variant,,E           | T  | ENSG00000187097 |
| 0 | EP400,intron_variant,,EN           | A  | ENSG00000183495 |
| 0 | EPHB6,intron_variant,,El           | A  | ENSG00000106123 |
| 0 | EPHX1,missense_varian              | G  | ENSG00000143819 |
| 0 | EPHX2,synonymous_var               | T  | ENSG00000120915 |
| 0 | ERN1,intron_variant,,ENS           | A  | ENSG00000178607 |
| 0 | ESPL1,intron_variant,,EM           | G  | ENSG00000135476 |
| 0 | ESYT3,missense_variant             | A  | ENSG00000158220 |
| 0 | ETFA,missense_variant,,j           | A  | ENSG00000140374 |
| 0 | ETFB,missense_variant,,j           | A  | ENSG00000105379 |
| 0 | ETHE1,synonymous_vari              | T  | ENSG00000105755 |
| 0 | EVI5,intron_variant,,ENS           | T  | ENSG00000067208 |
| 1 | EVI5L,intron_variant,,ENS          | T  | ENSG00000142459 |
| 0 | EVI5L,intron_variant,,ENS          | T  | ENSG00000142459 |
| 0 | EVPL,intron_variant,,ENS           | T  | ENSG00000167880 |
| 0 | EVPL,synonymous_varia              | T  | ENSG00000167880 |
| 0 | EXD2,intron_variant,,ENS           | A  | ENSG00000081177 |
| 0 | EXO1,missense_variant,,j           | A  | ENSG00000174371 |
| 0 | EXOC1,intron_variant,,El           | T  | ENSG00000090989 |
| 0 | EZR,intron_variant,,ENS            | C  | ENSG00000092820 |
| 0 | F8,missense_variant,p.A            | C  | ENSG00000185010 |
| 0 | F8,intron_variant,,ENSTC           | T  | ENSG00000185010 |
| 0 | F9,missense_variant,p.V            | A  | ENSG00000101981 |
| 0 | FAAH2,intron_variant,,EM           | A  | ENSG00000165591 |
| 0 | FADS2,intron_variant,,EM           | G  | ENSG00000134824 |
| 0 | FADS3,intron_variant,,EM           | G  | ENSG00000221968 |
| 0 | FAH,intron_variant,,ENS            | G  | ENSG00000103876 |
| 0 | FAM118A,missense_vari              | A  | ENSG00000100376 |
| 0 | FAM122C,3_prime_UTR                | CG | ENSG00000156500 |
| 0 | FAM122C,3_prime_UTR CCTAGATGCAGGAG |    | ENSG00000156500 |
| 1 | FAM127C,3_prime_UTR                | C  | ENSG00000212747 |
| 0 | FAM127C,3_prime_UTR                | T  | ENSG00000212747 |
| 0 | FAM135B,intron_variant,            | C  | ENSG00000147724 |
| 0 | FAM162B,synonymous_\               | A  | ENSG00000183807 |
| 0 | FAM168A,intron_variant,            | A  | ENSG00000054965 |

VEP annotated somatic variants

|   |                           |                  |                 |
|---|---------------------------|------------------|-----------------|
| 0 | FAM181B,3_prime_UTR       | T                | ENSG00000182103 |
| 0 | FAM184B,intron_variant    | G                | ENSG00000047662 |
| 0 | FAM186A,intron_variant    | A                | ENSG00000185958 |
| 0 | FAM187B,upstream_gen      | G                | ENSG00000177558 |
| 0 | FAM189B,intron_variant    | A                | ENSG00000160767 |
| 0 | FAM21C,5_prime_UTR        | G                | ENSG00000172661 |
| 0 | FAM63A,intron_variant,,E  | A                | ENSG00000143409 |
| 0 | FAM65B,synonymous_va      | G                | ENSG00000111913 |
| 0 | FAM81B,missense_varia     | T                | ENSG00000153347 |
| 0 | FANCA,intron_variant,,El  | A                | ENSG00000187741 |
| 0 | FANCE,intron_variant,,El  | G                | ENSG00000112039 |
| 0 | FANCE,intron_variant,,El  | G                | ENSG00000112039 |
| 0 | FANCE,synonymous_var      | C                | ENSG00000112039 |
| 0 | FAR2,3_prime_UTR_vari     | C                | ENSG00000064763 |
| 0 | FARP2,intron_variant,,EM  | C                | ENSG00000006607 |
| 0 | FARP2,3_prime_UTR_va      | T                | ENSG00000006607 |
| 0 | FASN,synonymous_varia     | A                | ENSG00000169710 |
| 0 | FASN,intron_variant,,EN   | A                | ENSG00000169710 |
| 0 | FASN,intron_variant,,EN   | A                | ENSG00000169710 |
| 0 | CCDC57,3_prime_UTR        | T                | ENSG00000169710 |
| 0 | FBLN2,missense_variant    | T                | ENSG00000163520 |
| 0 | FBN3,missense_variant,p   | C                | ENSG00000142449 |
| 0 | FBRSL1,intron_variant,,E  | A                | ENSG00000112787 |
| 0 | LECT2,intron_variant,,EM  | A                | ENSG00000164616 |
| 0 | FBXO10,intron_variant,,E  | A                | ENSG00000147912 |
| 0 | FBXO10,intron_variant,,E  | G                | ENSG00000147912 |
| 0 | FBXO17,intron_variant,,E  | A                | ENSG00000269190 |
| 0 | FBXW12,intron_variant,,l  | T                | ENSG00000164049 |
| 0 | FBXW4,intron_variant,,E   | T                | ENSG00000107829 |
| 0 | FCAMR,intron_variant,,E   | T                | ENSG00000162897 |
| 0 | FCHO1,synonymous_var      | A                | ENSG00000130475 |
| 1 | FGFR4,missense_varian     | A                | ENSG00000160867 |
| 0 | FGG,3_prime_UTR_varia     | A                | ENSG00000171557 |
| 0 | FHOD3,intron_variant,,El  | C                | ENSG00000134775 |
| 0 | FHOD3,synonymous_var      | T                | ENSG00000134775 |
| 0 | FHOD3,intron_variant,,El  | T                | ENSG00000134775 |
| 0 | FIGN,intron_variant,,ENS  | T                | ENSG00000182263 |
| 0 | FIP1L1,intron_variant,,EM | CCTTTTAAACAACCAG | ENSG00000145216 |
| 0 | FKBP6,synonymous_vari     | A                | ENSG00000077800 |
| 0 | FKBP7,intron_variant,,EM  | A                | ENSG00000079150 |
| 0 | FLNA,missense_variant,p   | A                | ENSG00000196924 |
| 0 | FLNB,intron_variant,,ENS  | G                | ENSG00000136068 |
| 0 | FLT4,intron_variant,,ENS  | GGTTACCCTA       | ENSG00000037280 |
| 0 | FMN2,intron_variant,,EN   | C                | ENSG00000155816 |
| 0 | FMN2,intron_variant,,EN   | A                | ENSG00000155816 |
| 0 | FMO3,synonymous_varia     | T                | ENSG00000007933 |
| 0 | FNBP4,inframe_deletion,   | -                | ENSG00000109920 |
| 0 | FNBP4,intron_variant,,EM  | T                | ENSG00000109920 |
| 0 | FNDC1,intron_variant,,El  | T                | ENSG00000164694 |
| 0 | FNDC1,synonymous_var      | G                | ENSG00000164694 |
| 0 | FOXF2,synonymous_var      | C                | ENSG00000137273 |
| 0 | FOXP4,intron_variant,,EM  | A                | ENSG00000137166 |
| 0 | FPGS,3_prime_UTR_var      | C                | ENSG00000136877 |
| 0 | FRAS1,synonymous_vari     | C                | ENSG00000138759 |
| 0 | FRAS1,intron_variant,,EM  | G                | ENSG00000138759 |

VEP annotated somatic variants

|   |                          |   |                 |
|---|--------------------------|---|-----------------|
| 0 | FRAS1,synonymous_vari    | T | ENSG00000138759 |
| 0 | FRAS1,intron_variant,,E  | A | ENSG00000138759 |
| 0 | FRAS1,intron_variant,,E  | T | ENSG00000138759 |
| 0 | FREM3,synonymous_var     | T | ENSG00000183090 |
| 1 | FRMD4A,intron_variant,,l | T | ENSG00000151474 |
| 0 | FSIP1,intron_variant,,EN | A | ENSG00000150667 |
| 0 | FSTL5,intron_variant,,EN | A | ENSG00000168843 |
| 0 | FUBP3,synonymous_vari    | T | ENSG00000107164 |
| 0 | FUT1,intron_variant,,ENS | A | ENSG00000174951 |
| 0 | FUT6,splice_region_vari  | C | ENSG00000156413 |
| 1 | FXVD2,intron_variant,,E  | C | ENSG00000137731 |
| 0 | FYCO1,intron_variant,,E  | C | ENSG00000163820 |
| 0 | GADL1,intron_variant,,E  | A | ENSG00000144644 |
| 0 | GAK,intron_variant,,ENS  | T | ENSG00000178950 |
| 0 | GAK,intron_variant,,ENS  | - | ENSG00000178950 |
| 1 | GALC,intron_variant,,EN  | A | ENSG00000054983 |
| 0 | GALC,intron_variant,,EN  | G | ENSG00000054983 |
| 0 | GALK1,intron_variant,,E  | T | ENSG00000108479 |
| 0 | GALNT10,intron_variant,  | G | ENSG00000164574 |
| 0 | GALNT14,missense_vari    | T | ENSG00000158089 |
| 0 | GALNT8,missense_varia    | G | ENSG00000130035 |
| 0 | GALNT8,missense_varia    | T | ENSG00000130035 |
| 0 | GAREM,synonymous_va      | C | ENSG00000141441 |
| 0 | GAREM,missense_variar    | A | ENSG00000141441 |
| 0 | GAREM,3_prime_UTR_v      | T | ENSG00000141441 |
| 0 | GARNL3,5_prime_UTR_      | C | ENSG00000136895 |
| 0 | GBP5,5_prime_UTR_var     | A | ENSG00000154451 |
| 0 | GBP5,intron_variant,,EN  | T | ENSG00000154451 |
| 0 | GBP5,synonymous_varia    | A | ENSG00000154451 |
| 0 | GCGR,synonymous_vari     | T | ENSG00000215644 |
| 1 | GCNT2,synonymous_var     | G | ENSG00000111846 |
| 0 | GDA,splice_region_varia  | G | ENSG00000119125 |
| 0 | GDAP1L1,intron_variant,  | G | ENSG00000124194 |
| 0 | GDF2,intron_variant,,EN  | C | ENSG00000128802 |
| 0 | GEMIN2,intron_variant,,E | G | ENSG00000092208 |
| 0 | GFM1,intron_variant,,EN  | G | ENSG00000168827 |
| 0 | GGCX,intron_variant,,EN  | T | ENSG00000115486 |
| 0 | GGN,missense_variant,p   | G | ENSG00000179168 |
| 0 | GGN,missense_variant,p   | A | ENSG00000179168 |
| 0 | GHDC,missense_variant    | A | ENSG00000167925 |
| 0 | GINM1,intron_variant,,E  | A | ENSG00000055211 |
| 0 | GINS1,missense_variant   | A | ENSG00000101003 |
| 0 | GLG1,synonymous_varia    | A | ENSG00000090863 |
| 0 | GLG1,intron_variant,,EN  | A | ENSG00000090863 |
| 0 | GLIS2,intron_variant,,EN | T | ENSG00000126603 |
| 0 | GLO1,5_prime_UTR_var     | A | ENSG00000124767 |
| 0 | GLRA4,missense_varian    | C | ENSG00000188828 |
| 0 | GLRA4,intron_variant,,E  | G | ENSG00000188828 |
| 0 | GLT8D2,intron_variant,,E | A | ENSG00000120820 |
| 0 | GLYATL2,intron_variant,, | C | ENSG00000156689 |
| 0 | GMCL1,intron_variant,,E  | T | ENSG00000087338 |
| 0 | GNAZ,synonymous_vari     | T | ENSG00000128266 |
| 1 | GNB1L,missense_varian    | T | ENSG00000185838 |
| 0 | GNRHR,synonymous_va      | A | ENSG00000109163 |
| 0 | GOLGA3,synonymous_v      | A | ENSG00000090615 |

VEP annotated somatic variants

|   |                          |   |                 |
|---|--------------------------|---|-----------------|
| 1 | GP1BA,splice_region_va   | C | ENSG00000185245 |
| 0 | GPC6,synonymous_varia    | A | ENSG00000183098 |
| 0 | GPLD1,intron_variant,,E  | G | ENSG00000112293 |
| 0 | GPM6B,intron_variant,,E  | - | ENSG00000046653 |
| 0 | GPN1,synonymous_varia    | T | ENSG00000198522 |
| 0 | GPR101,missense_varia    | A | ENSG00000165370 |
| 0 | GPR123,missense_varia    | C | ENSG00000197177 |
| 0 | GPR123,5_prime_UTR_v     | T | ENSG00000197177 |
| 1 | GPR123,intron_variant,,E | A | ENSG00000197177 |
| 0 | GPR123,intron_variant,,E | A | ENSG00000197177 |
| 0 | GPR176,intron_variant,,E | G | ENSG00000166073 |
| 0 | GRAMD1B,synonymous_      | C | ENSG00000023171 |
| 0 | GRAMD1C,intron_varian    | A | ENSG00000178075 |
| 0 | GRAMD4,intron_variant,,  | A | ENSG00000075240 |
| 0 | GRAMD4,intron_variant,,  | T | ENSG00000075240 |
| 0 | GRAMD4,intron_variant,,  | A | ENSG00000075240 |
| 0 | GREB1,intron_variant,,E  | A | ENSG00000196208 |
| 0 | GRIA1,intron_variant,,E  | T | ENSG00000155511 |
| 0 | GRIA2,intron_variant,,E  | A | ENSG00000120251 |
| 1 | GRIA3,intron_variant,,E  | A | ENSG00000125675 |
| 0 | GRM7,synonymous_varia    | T | ENSG00000196277 |
| 0 | GSE1,intron_variant,,E   | C | ENSG00000131149 |
| 0 | GSN,missense_variant,p   | T | ENSG00000148180 |
| 0 | GSPT2,5_prime_UTR_va     | T | ENSG00000189369 |
| 0 | GSTP1,intron_variant,,E  | T | ENSG00000084207 |
| 0 | GSTZ1,5_prime_UTR_va     | T | ENSG00000100577 |
| 0 | GTPBP4,intron_variant,,E | T | ENSG00000107937 |
| 0 | GTPBP4,3_prime_UTR_v     | T | ENSG00000107937 |
| 0 | GUCY2F,intron_variant,,I | A | ENSG00000101890 |
| 0 | GXYLT2,3_prime_UTR_v     | A | ENSG00000172986 |
| 0 | HAL,intron_variant,,E    | C | ENSG00000084110 |
| 0 | HAMP,intron_variant,,E   | T | ENSG00000105697 |
| 0 | HDAC7,intron_variant,,E  | C | ENSG00000061273 |
| 0 | HDAC7,intron_variant,,E  | C | ENSG00000061273 |
| 0 | HDAC9,intron_variant,,E  | T | ENSG00000048052 |
| 0 | HDDC2,intron_variant,,E  | A | ENSG00000111906 |
| 0 | HDHD1,synonymous_var     | T | ENSG00000130021 |
| 0 | HEATR1,intron_variant,,E | A | ENSG00000119285 |
| 0 | HEATR1,intron_variant,,E | A | ENSG00000119285 |
| 0 | HEATR1,synonymous_va     | T | ENSG00000119285 |
| 0 | HEATR2,missense_varia    | C | ENSG00000164818 |
| 0 | HECTD1,intron_variant,,I | A | ENSG00000092148 |
| 0 | HECTD1,intron_variant,,I | A | ENSG00000092148 |
| 0 | HELLS,intron_variant,,E  | C | ENSG00000119969 |
| 0 | HELLS,intron_variant,,E  | C | ENSG00000119969 |
| 0 | HEMK1,intron_variant,,E  | T | ENSG00000114735 |
| 0 | HERC1,intron_variant,,E  | A | ENSG00000103657 |
| 0 | HFE,missense_variant,p   | G | ENSG00000010704 |
| 0 | HGF,synonymous_varian    | T | ENSG00000019991 |
| 0 | HHATL,intron_variant,,E  | C | ENSG00000010282 |
| 0 | HHIPL1,3_prime_UTR_v     | A | ENSG00000182218 |
| 0 | HIGD1B,synonymous_va     | T | ENSG00000131097 |
| 0 | HINT1,3_prime_UTR_va     | A | ENSG00000169567 |
| 0 | HIST1H2BF,3_prime_UT     | T | ENSG00000197846 |
| 0 | HIST1H3D,intron_variant  | T | ENSG00000197409 |

VEP annotated somatic variants

|   |                           |   |                 |
|---|---------------------------|---|-----------------|
| 0 | HIST1H4B,synonymous_      | A | ENSG00000124529 |
| 0 | HKDC1,intron_variant,,E   | - | ENSG00000156510 |
| 0 | HLA-DPB1,missense_va      | A | ENSG00000223865 |
| 0 | HLCS,intron_variant,,EN   | T | ENSG00000159267 |
| 0 | HLTF,intron_variant,,ENS  | - | ENSG00000071794 |
| 0 | HMBS,synonymous_vari      | T | ENSG00000256269 |
| 0 | HMGXB4,intron_variant,,   | A | ENSG00000100281 |
| 0 | HMGXB4,missense_vari      | T | ENSG00000100281 |
| 0 | HNF1A,intron_variant,,E   | A | ENSG00000135100 |
| 0 | HNRNPUL1,intron_variar    | A | ENSG00000105323 |
| 0 | HOKK2,synonymous_vari     | T | ENSG00000095066 |
| 0 | HPN,intron_variant,,ENS   | C | ENSG00000105707 |
| 0 | HPS6,synonymous_varia     | A | ENSG00000166189 |
| 0 | HSPB6,splice_region_va    | T | ENSG00000004776 |
| 0 | HTR5A,synonymous_var      | A | ENSG00000157219 |
| 0 | HUWE1,synonymous_va       | C | ENSG00000086758 |
| 0 | HUWE1,missense_variar     | T | ENSG00000086758 |
| 0 | ICOSLG,missense_varia     | T | ENSG00000160223 |
| 0 | ICOSLG,intron_variant,,E  | T | ENSG00000160223 |
| 0 | ICOSLG,3_prime_UTR_\      | G | ENSG00000160223 |
| 0 | IDH2,intron_variant,,ENS  | C | ENSG00000182054 |
| 0 | IDH3A,intron_variant,,EN  | G | ENSG00000166411 |
| 0 | IFI16,missense_variant,p  | C | ENSG00000163565 |
| 0 | IFNAR2,missense_variar    | G | ENSG00000159110 |
| 0 | IGF1R,intron_variant,,EN  | G | ENSG00000140443 |
| 0 | IGF2R,intron_variant,,EN  | G | ENSG00000197081 |
| 0 | IGF2R,splice_region_var   | A | ENSG00000197081 |
| 0 | IGF2R,intron_variant,,EN  | A | ENSG00000197081 |
| 0 | IGLON5,intron_variant,,E  | T | ENSG00000142549 |
| 0 | IGSF1,synonymous_vari     | C | ENSG00000147255 |
| 0 | IGSF1,synonymous_vari     | G | ENSG00000147255 |
| 0 | IGSF1,intron_variant,,EN  | A | ENSG00000147255 |
| 0 | IGSF11,intron_variant,,E  | A | ENSG00000144847 |
| 0 | IGSF11,missense_variar    | A | ENSG00000144847 |
| 0 | IGSF11,intron_variant,,E  | G | ENSG00000144847 |
| 0 | IGSF22,splice_region_va   | C | ENSG00000179057 |
| 0 | IGSF9B,intron_variant,,E  | - | ENSG00000080854 |
| 0 | IKBKAP,synonymous_va      | G | ENSG00000070061 |
| 0 | IL17RC,intron_variant,,E  | - | ENSG00000163702 |
| 0 | IL20RA,missense_varian    | T | ENSG00000016402 |
| 0 | IL22RA1,intron_variant,,E | T | ENSG00000142677 |
| 0 | IL2RA,3_prime_UTR_var     | T | ENSG00000134460 |
| 0 | INO80E,3_prime_UTR_v      | C | ENSG00000169592 |
| 0 | INS,missense_variant,p./  | A | ENSG00000254647 |
| 0 | IGF2,intron_variant,,ENS  | G | ENSG00000129965 |
| 0 | INSR,synonymous_variar    | T | ENSG00000171105 |
| 0 | INSR,intron_variant,,ENS  | G | ENSG00000171105 |
| 0 | INTS1,intron_variant,,EN  | A | ENSG00000164880 |
| 0 | INTS1,intron_variant,,EN  | A | ENSG00000164880 |
| 0 | INTS6,intron_variant,,EN  | A | ENSG00000102786 |
| 0 | IQGAP2,intron_variant,,E  | G | ENSG00000145703 |
| 0 | IQGAP3,intron_variant,,E  | - | ENSG00000183856 |
| 0 | IQSEC3,intron_variant,,E  | A | ENSG00000120645 |
| 0 | IRF5,intron_variant,,ENS  | A | ENSG00000128604 |
| 0 | IRGC,synonymous_varia     | C | ENSG00000124449 |

VEP annotated somatic variants

|   |                           |                  |                 |
|---|---------------------------|------------------|-----------------|
| 0 | ITGA10,intron_variant,,E  | G                | ENSG00000143127 |
| 0 | ITGA10,intron_variant,,E  | C                | ENSG00000143127 |
| 0 | ITGA4,intron_variant,,EN  | C                | ENSG00000115232 |
| 0 | ITGA9,intron_variant,,EN  | A                | ENSG00000144668 |
| 0 | ITIH4,intron_variant,,ENS | C                | ENSG00000055955 |
| 0 | ITIH4,synonymous_varia    | T                | ENSG00000055955 |
| 0 | ITIH4,intron_variant,,ENS | C                | ENSG00000055955 |
| 0 | ITM2A,intron_variant,,EN  | G                | ENSG00000078596 |
| 0 | ITPKB,intron_variant,,EN  | C                | ENSG00000143772 |
| 0 | ITPR2,intron_variant,,EN  | T                | ENSG00000123104 |
| 0 | ITPR2,intron_variant,,EN  | GAAGCTG          | ENSG00000123104 |
| 0 | ITPR3,splice_region_vari  | A                | ENSG00000096433 |
| 0 | ITPRIP,synonymous_vari    | A                | ENSG00000148841 |
| 0 | ITSN1,intron_variant,,EN  | A                | ENSG00000205726 |
| 0 | ITSN1,intron_variant,,EN  | C                | ENSG00000205726 |
| 0 | JADE1,intron_variant,,EN  | T                | ENSG00000077684 |
| 0 | JADE3,intron_variant,,EN  | A                | ENSG00000102221 |
| 0 | JAKMIP3,intron_variant,,  | G                | ENSG00000188385 |
| 0 | JARID2,intron_variant,,E  | A                | ENSG00000008083 |
| 0 | JARID2,intron_variant,,E  | G                | ENSG00000008083 |
| 0 | JARID2,synonymous_vari    | T                | ENSG00000008083 |
| 0 | JRKL,3_prime_UTR_vari     | -                | ENSG00000183340 |
| 0 | KANK1,3_prime_UTR_va      | T                | ENSG00000107104 |
| 0 | KANK4,intron_variant,,E   | G                | ENSG00000132854 |
| 0 | KANK4,synonymous_var      | A                | ENSG00000132854 |
| 1 | KANK4,synonymous_var      | A                | ENSG00000132854 |
| 0 | KATNA1,synonymous_va      | T                | ENSG00000186625 |
| 0 | KCNA7,missense_varian     | C                | ENSG00000104848 |
| 0 | KCNAB1,intron_variant,,E  | A                | ENSG00000169282 |
| 0 | KCNU1,intron_variant,,E   | T                | ENSG00000215262 |
| 0 | KCP,intron_variant,,ENS   | T                | ENSG00000135253 |
| 1 | KCTD10,intron_variant,,E  | C                | ENSG00000110906 |
| 0 | KCTD4,5_prime_UTR_va      | A                | ENSG00000180332 |
| 0 | KDM3B,intron_variant,,E   | A                | ENSG00000120733 |
| 0 | KDM4A,intron_variant,,E   | A                | ENSG00000066135 |
| 0 | KDM4B,intron_variant,,E   | T                | ENSG00000127663 |
| 0 | KDM5D,intron_variant,,E   | T                | ENSG00000012817 |
| 0 | KDM6A,missense_varian     | A                | ENSG00000147050 |
| 1 | KDM7A,intron_variant,,E   | G                | ENSG00000006459 |
| 0 | KDM7A,synonymous_var      | G                | ENSG00000006459 |
| 0 | KDM7A,missense_varian     | T                | ENSG00000006459 |
| 0 | KIAA0930,synonymous_v     | A                | ENSG00000100364 |
| 0 | KIAA1109,intron_variant,  | A                | ENSG00000138688 |
| 0 | KIAA1244,missense_vari    | G                | ENSG00000112379 |
| 0 | KIAA1429,intron_variant,  | -                | ENSG00000164944 |
| 0 | KIAA1683,synonymous_v     | A                | ENSG00000130518 |
| 0 | KIAA1919,intron_variant,  | A                | ENSG00000173214 |
| 0 | KIF14,intron_variant,,EN  | A                | ENSG00000118193 |
| 0 | KIF17,synonymous_varia    | A                | ENSG00000117245 |
| 0 | KIF19,intron_variant,,EN  | T                | ENSG00000196169 |
| 0 | KIF1A,intron_variant,,EN  | TTAATCATGGGCCTCC | ENSG00000130294 |
| 0 | KIF1C,intron_variant,,EN  | A                | ENSG00000129250 |
| 0 | KIF20B,intron_variant,,E  | -                | ENSG00000138182 |
| 0 | KIFAP3,intron_variant,,E  | T                | ENSG00000075945 |
| 0 | KIN,intron_variant,,EN    | C                | ENSG00000151657 |



VEP annotated somatic variants

|   |                                           |   |                 |
|---|-------------------------------------------|---|-----------------|
| 0 | KLF10,synonymous_vari                     | G | ENSG00000155090 |
| 3 | KLHL2,splice_region_var                   | G | ENSG00000109466 |
| 0 | KLHL8,intron_variant,,EN                  | A | ENSG00000145332 |
| 0 | KLRG1,intron_variant,,E                   | A | ENSG00000139187 |
| 0 | KMT2C,intron_variant,,E                   | C | ENSG00000055609 |
| 0 | KNDC1,intron_variant,,E                   | A | ENSG00000171798 |
| 0 | KNTC1,splice_region_va                    | G | ENSG00000184445 |
| 1 | KPNA7,synonymous_var                      | T | ENSG00000185467 |
| 1 | KPNB1,intron_variant,,E                   | A | ENSG00000108424 |
| 0 | KREMEN1,intron_variant                    | T | ENSG00000183762 |
| 0 | KRT10,intron_variant,,E                   | T | ENSG00000186395 |
| 0 | KRT32,intron_variant,,E                   | C | ENSG00000108759 |
| 0 | KRT36,3_prime_UTR_va                      | A | ENSG00000126337 |
| 0 | KRTAP10-9,3_prime_UT                      | C | ENSG00000221837 |
| 0 | KRTAP12-3,3_prime_UT                      | C | ENSG00000205439 |
| 0 | KRTAP12-4,synonymous                      | G | ENSG00000212933 |
| 0 | L3MBTL2,intron_variant,,                  | T | ENSG00000100395 |
| 0 | LAMA2,intron_variant,,E                   | - | ENSG00000196569 |
| 0 | LAMA2,intron_variant,,E                   | G | ENSG00000196569 |
| 1 | LAMA4,intron_variant,,E                   | A | ENSG00000112769 |
| 0 | LAMA4,intron_variant,,E                   | T | ENSG00000112769 |
| 0 | LAMC1,intron_variant,,E                   | A | ENSG00000135862 |
| 0 | LAMC1,intron_variant,,E                   | C | ENSG00000135862 |
| 0 | LAMC1,intron_variant,,E                   | A | ENSG00000135862 |
| 0 | LAMC2,5_prime_UTR_va                      | A | ENSG00000058085 |
| 0 | LATS1,synonymous_vari                     | G | ENSG00000131023 |
| 0 | LCE3C,5_prime_UTR_va                      | T | ENSG00000244057 |
| 0 | LCN8,intron_variant,,EN\$GGTGACAGGTGACCTG |   | ENSG00000204001 |
| 0 | LDLRAD2,intron_variant,                   | A | ENSG00000187942 |
| 0 | LEMD3,intron_variant,,E                   | A | ENSG00000174106 |
| 0 | LFNG,intron_variant,,EN\$                 | A | ENSG00000106003 |
| 0 | LILRA4,intron_variant,,E                  | T | ENSG00000239961 |
| 0 | LIMK1,intron_variant,,EN                  | A | ENSG00000106683 |
| 1 | LINGO3,missense_varia                     | T | ENSG00000220008 |
| 0 | LMBR1L,intron_variant,,E                  | T | ENSG00000139636 |
| 0 | LMO7,intron_variant,,EN\$                 | A | ENSG00000136153 |
| 0 | LNPEP,intron_variant,,E                   | A | ENSG00000113441 |
| 0 | LONRF1,intron_variant,,E                  | - | ENSG00000154359 |
| 0 | LONRF3,synonymous_va                      | C | ENSG00000175556 |
| 0 | LONRF3,synonymous_va                      | G | ENSG00000175556 |
| 0 | LOXL1,intron_variant,,E                   | C | ENSG00000129038 |
| 0 | LPP,3_prime_UTR_varia                     | G | ENSG00000145012 |
| 0 | LRMP,intron_variant,,EN                   | C | ENSG00000118308 |
| 0 | LRP1B,intron_variant,,E                   | A | ENSG00000168702 |
| 0 | LRP5,intron_variant,,EN\$                 | T | ENSG00000162337 |
| 0 | LRP5L,missense_variant                    | A | ENSG00000100068 |
| 0 | LRP5L,intron_variant,,E                   | A | ENSG00000100068 |
| 0 | LRPAP1,intron_variant,,E                  | A | ENSG00000163956 |
| 0 | LRR1,intron_variant,,EN\$                 | T | ENSG00000165501 |
| 0 | LRR18,missense_varia                      | A | ENSG00000165383 |
| 0 | LRRCC1,3_prime_UTR_                       | G | ENSG00000133739 |
| 0 | LRRIQ1,intron_variant,,E                  | A | ENSG00000133640 |
| 0 | LSG1,missense_variant,                    | G | ENSG00000041802 |
| 0 | LSM14A,missense_varia                     | A | ENSG00000257103 |
| 0 | LSM6,3_prime_UTR_var                      | G | ENSG00000164167 |

VEP annotated somatic variants

|   |                          |   |                 |
|---|--------------------------|---|-----------------|
| 0 | LSS,intron_variant,,ENST | T | ENSG00000160285 |
| 0 | LTN1,intron_variant,,ENS | A | ENSG00000198862 |
| 0 | LUZP2,intron_variant,,EM | C | ENSG00000187398 |
| 0 | LYPD4,intron_variant,,EM | T | ENSG00000183103 |
| 0 | LYSMD1,5_prime_UTR_v     | G | ENSG00000163155 |
| 0 | LZTS2,downstream_gene    | G | ENSG00000107816 |
| 0 | LZTS2,splice_region_var  | T | ENSG00000107816 |
| 0 | MAD1L1,intron_variant,,E | C | ENSG00000002822 |
| 0 | MAD2L1,intron_variant,,E | C | ENSG00000164109 |
| 0 | MAGEA1,intron_variant,,  | C | ENSG00000198681 |
| 0 | MAGEA12,synonymous_v     | C | ENSG00000213401 |
| 0 | MAGEB4,5_prime_UTR_v     | T | ENSG00000120289 |
| 0 | MAGEC1,intron_variant,,  | C | ENSG00000155495 |
| 0 | MAGEC2,synonymous_v      | T | ENSG00000046774 |
| 0 | MAGED2,intron_variant,,  | A | ENSG00000102316 |
| 0 | MAMDC4,intron_variant,,  | A | ENSG00000177943 |
| 0 | MAMLD1,synonymous_v      | T | ENSG00000013619 |
| 0 | MAN1A1,intron_variant,,f | G | ENSG00000111885 |
| 0 | MAN2A1,synonymous_v      | A | ENSG00000112893 |
| 0 | MAN2B2,missense_varia    | C | ENSG00000013288 |
| 0 | MAP1S,missense_varian    | T | ENSG00000130479 |
| 0 | MAP3K15,missense_vari    | T | ENSG00000180815 |
| 0 | MAP3K3,intron_variant,,E | T | ENSG00000198909 |
| 0 | MAP4K1,synonymous_v      | C | ENSG00000104814 |
| 0 | MAP4K4,intron_variant,,E | G | ENSG00000071054 |
| 0 | MAPKAPK3,intron_variar   | - | ENSG00000114738 |
| 0 | MAST1,intron_variant,,E1 | C | ENSG00000105613 |
| 0 | MAST1,splice_region_va   | C | ENSG00000105613 |
| 0 | MAST4,5_prime_UTR_v      | G | ENSG00000069020 |
| 0 | MATN4,missense_varian    | T | ENSG00000124159 |
| 0 | MCCC1,intron_variant,,E  | G | ENSG00000078070 |
| 0 | MCM3AP,intron_variant,,  | A | ENSG00000160294 |
| 0 | MDGA1,synonymous_va      | T | ENSG00000112139 |
| 0 | MDN1,intron_variant,,EN  | T | ENSG00000112159 |
| 0 | MDN1,intron_variant,,EN  | T | ENSG00000112159 |
| 0 | MECP2,synonymous_var     | A | ENSG00000169057 |
| 0 | MED14,intron_variant,,E1 | T | ENSG00000180182 |
| 0 | MED22,5_prime_UTR_v      | C | ENSG00000148297 |
| 0 | MED25,intron_variant,,E1 | C | ENSG00000104973 |
| 0 | MED29,missense_varian    | C | ENSG00000063322 |
| 0 | MEF2B,intron_variant,,E1 | A | ENSG00000213999 |
| 0 | MEGF6,intron_variant,,E1 | C | ENSG00000162591 |
| 0 | MEP1B,intron_variant,,E1 | G | ENSG00000141434 |
| 0 | MERTK,3_prime_UTR_v      | T | ENSG00000153208 |
| 0 | METTL3,intron_variant,,E | T | ENSG00000165819 |
| 0 | METTL8,synonymous_v      | T | ENSG00000123600 |
| 0 | MFSD12,intron_variant,,E | A | ENSG00000161091 |
| 2 | MGAT5B,synonymous_v      | A | ENSG00000167889 |
| 0 | MGAT5B,intron_variant,,l | A | ENSG00000167889 |
| 0 | MGAT5B,synonymous_v      | T | ENSG00000167889 |
| 0 | MGMT,missense_variant    | T | ENSG00000170430 |
| 0 | MICAL3,intron_variant,,E | A | ENSG00000243156 |
| 0 | MICAL3,intron_variant,,E | A | ENSG00000243156 |
| 0 | MICAL3,intron_variant,,E | G | ENSG00000243156 |
| 0 | MID1,intron_variant,,ENS | T | ENSG00000101871 |

VEP annotated somatic variants

|   |                                   |        |                 |
|---|-----------------------------------|--------|-----------------|
| 0 | MINK1,intron_variant,,EN          | C      | ENSG00000141503 |
| 1 | MINK1,intron_variant,,EN          | C      | ENSG00000141503 |
| 0 | MLEC,intron_variant,,EN           | T      | ENSG00000110917 |
| 0 | MLK4,intron_variant,,EN           | G      | ENSG00000143674 |
| 1 | MLLT1,intron_variant,,EN          | T      | ENSG00000130382 |
| 0 | MMP21,intron_variant,,EN          | A      | ENSG00000154485 |
| 0 | MNX1,intron_variant,,EN           | G      | ENSG00000130675 |
| 0 | MOB3A,missense_variant,,EN        | G      | ENSG00000172081 |
| 0 | MORC4,intron_variant,,EN          | T      | ENSG00000133131 |
| 0 | MORC4,missense_variant,,EN        | A      | ENSG00000133131 |
| 0 | MORF4L1,intron_variant,,EN        | T      | ENSG00000185787 |
| 0 | MPZL3,intron_variant,,EN          | A      | ENSG00000160588 |
| 0 | MRE11A,splice_donor_variant,,EN   | T      | ENSG00000020922 |
| 0 | MROH7,missense_variant,,EN        | G      | ENSG00000184313 |
| 0 | MROH7,missense_variant,,EN        | G      | ENSG00000184313 |
| 0 | MROH7,missense_variant,,EN        | C      | ENSG00000184313 |
| 0 | MRPL10,intron_variant,,EN         | G      | ENSG00000159111 |
| 0 | MRPL41,intron_variant,,EN         | A      | ENSG00000182154 |
| 0 | MRPL43,intron_variant,,EN         | A      | ENSG00000055950 |
| 0 | MRPS10,intron_variant,,EN         | T      | ENSG00000048544 |
| 0 | MRV11,splice_acceptor_variant,,EN | T      | ENSG00000072952 |
| 0 | MSH2,intron_variant,,EN           | -      | ENSG00000095002 |
| 0 | MSMO1,intron_variant,,EN          | T      | ENSG00000052802 |
| 0 | MTOR,synonymous_variant,,EN       | T      | ENSG00000198793 |
| 0 | MTR,synonymous_variant,,EN        | G      | ENSG00000116984 |
| 0 | MTR,intron_variant,,EN            | T      | ENSG00000116984 |
| 0 | MTR,intron_variant,,EN            | G      | ENSG00000116984 |
| 0 | MTR,intron_variant,,EN            | A      | ENSG00000116984 |
| 1 | MTTP,intron_variant,,EN           | -      | ENSG00000138823 |
| 0 | MUC16,splice_region_variant,,EN   | GGGAGA | ENSG00000181143 |
| 0 | MUC16,synonymous_variant,,EN      | C      | ENSG00000181143 |
| 0 | MUC19,missense_variant,,EN        | C      | ENSG00000205592 |
| 0 | MUC19,intron_variant,,EN          | A      | ENSG00000205592 |
| 0 | MUC2,synonymous_variant,,EN       | C      | ENSG00000198788 |
| 0 | MVD,intron_variant,,EN            | A      | ENSG00000167508 |
| 2 | MXRA5,synonymous_variant,,EN      | G      | ENSG00000101825 |
| 0 | MYADML2,synonymous_variant,,EN    | A      | ENSG00000185105 |
| 0 | MYBPC3,intron_variant,,EN         | -      | ENSG00000134571 |
| 0 | MYH11,missense_variant,,EN        | T      | ENSG00000133392 |
| 0 | MYH15,intron_variant,,EN          | C      | ENSG00000144821 |
| 0 | MYH7,synonymous_variant,,EN       | T      | ENSG00000092054 |
| 0 | MYH7,intron_variant,,EN           | T      | ENSG00000092054 |
| 0 | MYH7,intron_variant,,EN           | C      | ENSG00000092054 |
| 0 | MYH9,intron_variant,,EN           | T      | ENSG00000100345 |
| 0 | MYLK,synonymous_variant,,EN       | A      | ENSG00000065534 |
| 0 | MYO15A,intron_variant,,EN         | T      | ENSG00000091536 |
| 0 | MYO18B,intron_variant,,EN         | C      | ENSG00000133454 |
| 0 | MYO19,intron_variant,,EN          | T      | ENSG00000141140 |
| 0 | MYO1F,intron_variant,,EN          | C      | ENSG00000142347 |
| 0 | MYO5A,intron_variant,,EN          | T      | ENSG00000197535 |
| 2 | MYO9B,intron_variant,,EN          | C      | ENSG00000099331 |
| 0 | MYOG,5_prime_UTR_variant,,EN      | G      | ENSG00000122180 |
| 0 | MYPN,synonymous_variant,,EN       | T      | ENSG00000138347 |
| 1 | MYRF,intron_variant,,EN           | C      | ENSG00000124920 |
| 0 | MYSM1,intron_variant,,EN          | G      | ENSG00000162601 |

VEP annotated somatic variants

|   |                           |   |                 |
|---|---------------------------|---|-----------------|
| 0 | NAA35,intron_variant,,EN  | A | ENSG00000135040 |
| 0 | NACC2,synonymous_var      | T | ENSG00000148411 |
| 0 | ALG1,5_prime_UTR_vari     | A | ENSG00000103174 |
| 0 | NAPSA,missense_varian     | T | ENSG00000131400 |
| 1 | NAT9,intron_variant,,ENS  | G | ENSG00000109065 |
| 0 | NBAS,intron_variant,,EN   | T | ENSG00000151779 |
| 0 | NBR1,missense_variant,    | G | ENSG00000188554 |
| 0 | NBR1,intron_variant,,EN   | T | ENSG00000188554 |
| 1 | NBR1,splice_region_vari   | C | ENSG00000188554 |
| 0 | NBR1,intron_variant,,EN   | A | ENSG00000188554 |
| 0 | NCAN,missense_variant,    | T | ENSG00000130287 |
| 0 | NCAPD2,intron_variant,,I  | T | ENSG00000010292 |
| 0 | NCAPD3,intron_variant,,I  | T | ENSG00000151503 |
| 0 | NCAPH,intron_variant,,E   | A | ENSG00000121152 |
| 0 | NCOA6,intron_variant,,El  | A | ENSG00000198646 |
| 0 | NCOR1,intron_variant,,E   | A | ENSG00000141027 |
| 1 | NDUFS2,synonymous_va      | T | ENSG00000158864 |
| 0 | NEB,intron_variant,,ENS   | A | ENSG00000183091 |
| 0 | NEB,intron_variant,,ENS   | C | ENSG00000183091 |
| 0 | NEB,intron_variant,,ENS   | C | ENSG00000183091 |
| 0 | NELFA,synonymous_vari     | T | ENSG00000185049 |
| 0 | NENF,synonymous_varia     | C | ENSG00000117691 |
| 0 | NENF,intron_variant,,EN   | G | ENSG00000117691 |
| 0 | NEXN,missense_variant,    | C | ENSG00000162614 |
| 0 | NFKB1,intron_variant,,EM  | T | ENSG00000109320 |
| 0 | NFKB2,intron_variant,,EM  | A | ENSG00000077150 |
| 0 | NFKBIZ,intron_variant,,E  | G | ENSG00000144802 |
| 0 | NHLRC1,synonymous_va      | G | ENSG00000187566 |
| 0 | NHSL1,intron_variant,,EM  | G | ENSG00000135540 |
| 0 | NID1,intron_variant,,ENS  | T | ENSG00000116962 |
| 0 | NIN,intron_variant,,ENST  | A | ENSG00000100503 |
| 0 | NIPAL3,intron_variant,,El | A | ENSG00000001461 |
| 0 | NIPAL4,missense_varian    | G | ENSG00000172548 |
| 0 | NIPBL,3_prime_UTR_va      | A | ENSG00000164190 |
| 0 | NIPSNAP1,intron_varian    | T | ENSG00000184117 |
| 0 | NISCH,synonymous_vari     | A | ENSG00000010322 |
| 0 | NKX2-8,missense_variar    | G | ENSG00000136327 |
| 0 | NLGN3,intron_variant,,El  | G | ENSG00000196338 |
| 0 | NLRC4,intron_variant,,EM  | - | ENSG00000091106 |
| 0 | NLRP5,intron_variant,,EM  | C | ENSG00000171487 |
| 0 | NLRP5,splice_region_var   | T | ENSG00000171487 |
| 0 | NLRP5,intron_variant,,EM  | A | ENSG00000171487 |
| 0 | NLRP9,intron_variant,,EM  | A | ENSG00000185792 |
| 0 | NOC4L,intron_variant,,El  | G | ENSG00000184967 |
| 1 | NOL6,intron_variant,,ENS  | A | ENSG00000165271 |
| 1 | NOP14,intron_variant,,EM  | A | ENSG00000087269 |
| 0 | NOP56,3_prime_UTR_va      | G | ENSG00000101361 |
| 0 | NOS1AP,5_prime_UTR_       | T | ENSG00000198929 |
| 0 | NOS3,missense_variant,    | G | ENSG00000164867 |
| 0 | NOS3,intron_variant,,EN   | C | ENSG00000164867 |
| 0 | NOTCH1,intron_variant,,   | G | ENSG00000148400 |
| 0 | NOTCH1,intron_variant,,   | T | ENSG00000148400 |
| 0 | NPC1L1,synonymous_va      | G | ENSG00000015520 |
| 0 | NPFFR1,missense_varia     | G | ENSG00000148734 |
| 0 | NPSR1,missense_varian     | G | ENSG00000187258 |

VEP annotated somatic variants

|   |                                           |     |                 |
|---|-------------------------------------------|-----|-----------------|
| 0 | NPTX2,intron_variant,,ENFGATCCGCCTGCCTTG/ |     | ENSG00000106236 |
| 0 | NR1D2,5_prime_UTR_v                       | G   | ENSG00000174738 |
| 0 | NR1I3,upstream_gene_v                     | -   | ENSG00000143257 |
| 0 | NRDE2,intron_variant,,EI                  | T   | ENSG00000119720 |
| 0 | NSD1,synonymous_varia                     | C   | ENSG00000165671 |
| 0 | NSUN2,intron_variant,,EI                  | A   | ENSG00000037474 |
| 0 | NT5DC2,intron_variant,,E                  | T   | ENSG00000168268 |
| 0 | NTF4,missense_variant,p                   | C   | ENSG00000225950 |
| 0 | NUDCD3,missense_varia                     | A   | ENSG00000015676 |
| 0 | NUFIP1,intron_variant,,E                  | A   | ENSG00000083635 |
| 0 | NUGGC,synonymous_va                       | T   | ENSG00000189233 |
| 0 | NUP107,intron_variant,,E                  | C   | ENSG00000111581 |
| 0 | NUP214,intron_variant,,E                  | A   | ENSG00000126883 |
| 0 | NUP43,missense_varian                     | G   | ENSG00000120253 |
| 0 | NUP50,3_prime_UTR_v                       | -   | ENSG00000093000 |
| 0 | NUP54,intron_variant,,EI                  | -   | ENSG00000138750 |
| 0 | NUP54,intron_variant,,EI                  | T   | ENSG00000138750 |
| 0 | NUP88,intron_variant,,EI                  | T   | ENSG00000108559 |
| 0 | NUP88,intron_variant,,EI                  | A   | ENSG00000108559 |
| 0 | NXF3,intron_variant,,ENS                  | C   | ENSG00000147206 |
| 0 | NXF5,intron_variant,,ENS                  | C   | ENSG00000126952 |
| 0 | NXF5,intron_variant,,ENS                  | T   | ENSG00000126952 |
| 0 | NXF5,intron_variant,,ENS                  | C   | ENSG00000126952 |
| 0 | NXN,intron_variant,,ENS                   | C   | ENSG00000167693 |
| 0 | OARD1,intron_variant,,EI                  | G   | ENSG00000124596 |
| 0 | OBSL1,synonymous_vari                     | A   | ENSG00000124006 |
| 0 | OGFOD3,synonymous_v                       | A   | ENSG00000181396 |
| 0 | OPA3,3_prime_UTR_var                      | T   | ENSG00000125741 |
| 0 | OR2AE1,3_prime_UTR_                       | G   | ENSG00000244623 |
| 0 | OR3A1,missense_varian                     | T   | ENSG00000180090 |
| 0 | OR4A16,synonymous_v                       | A   | ENSG00000181961 |
| 0 | OR4A5,missense_varian                     | T   | ENSG00000221840 |
| 1 | OR4C16,downstream_ge                      | T   | ENSG00000181935 |
| 0 | OR51B4,synonymous_v                       | A   | ENSG00000183251 |
| 0 | OR52N1,synonymous_v                       | G   | ENSG00000181001 |
| 0 | OR5AU1,missense_varia                     | C   | ENSG00000169327 |
| 0 | OR5H15,synonymous_v                       | A   | ENSG00000233412 |
| 0 | OR5I1,synonymous_vari                     | A   | ENSG00000167825 |
| 0 | OR5T1,5_prime_UTR_v                       | G   | ENSG00000181698 |
| 0 | OSBPL2,intron_variant,,E                  | T   | ENSG00000130703 |
| 0 | OSGIN1,splice_region_v                    | G   | ENSG00000140961 |
| 2 | OSGIN1,synonymous_v                       | G   | ENSG00000140961 |
| 0 | OSMR,intron_variant,,EN                   | -   | ENSG00000145623 |
| 0 | OTUD7A,intron_variant,,I                  | G   | ENSG00000169918 |
| 0 | OXA1L,inframe_insertion                   | AGC | ENSG00000155463 |
| 0 | P2RY4,missense_variant                    | G   | ENSG00000186912 |
| 0 | P4HB,synonymous_varia                     | A   | ENSG00000185624 |
| 0 | PABPC4,missense_varia                     | C   | ENSG00000090621 |
| 0 | PACS1,intron_variant,,EI                  | T   | ENSG00000175115 |
| 0 | PAGE5,intron_variant,,EI                  | A   | ENSG00000158639 |
| 0 | PALM,intron_variant,,EN                   | A   | ENSG00000099864 |
| 0 | PANK1,intron_variant,,EI                  | A   | ENSG00000152782 |
| 0 | PANK1,synonymous_var                      | G   | ENSG00000152782 |
| 0 | PANK4,missense_varian                     | A   | ENSG00000157881 |
| 1 | PAPOLG,intron_variant,,I                  | A   | ENSG00000115421 |

VEP annotated somatic variants

|   |                          |                  |                 |
|---|--------------------------|------------------|-----------------|
| 0 | PARS2,missense_varian    | A                | ENSG00000162396 |
| 0 | PARVA,synonymous_var     | T                | ENSG00000197702 |
| 0 | PARVB,splice_region_va   | G                | ENSG00000188677 |
| 1 | PAX8,intron_variant,,ENS | G                | ENSG00000125618 |
| 0 | PBOV1,missense_varian    | G                | ENSG00000254440 |
| 0 | PCDH15,intron_variant,,E | G                | ENSG00000150275 |
| 0 | PCDH9,missense_varian    | A                | ENSG00000184226 |
| 0 | PCLO,intron_variant,,EN  | A                | ENSG00000186472 |
| 0 | PCMT1,missense_varian    | A                | ENSG00000120265 |
| 0 | PCNT,intron_variant,,EN  | A                | ENSG00000160299 |
| 0 | PDE12,missense_variant   | T                | ENSG00000174840 |
| 0 | PDE1A,5_prime_UTR_va     | G                | ENSG00000115252 |
| 0 | PDE2A,synonymous_var     | A                | ENSG00000186642 |
| 0 | PDE6C,synonymous_var     | A                | ENSG00000095464 |
| 0 | PDGFRA,intron_variant,,  | T                | ENSG00000134853 |
| 0 | PDGFRB,synonymous_v      | C                | ENSG00000113721 |
| 1 | PDGFRB,splice_region_\   | C                | ENSG00000113721 |
| 0 | PDSS1,intron_variant,,E  | C                | ENSG00000148459 |
| 0 | PDXDC1,intron_variant,,l | G                | ENSG00000179889 |
| 0 | PDXDC1,intron_variant,,l | G                | ENSG00000179889 |
| 0 | PDZD7,intron_variant,,E  | -                | ENSG00000186862 |
| 1 | PEAK1,missense_varian    | G                | ENSG00000173517 |
| 0 | PEAR1,intron_variant,,E  | G                | ENSG00000187800 |
| 0 | PEAR1,synonymous_var     | A                | ENSG00000187800 |
| 0 | PEAR1,synonymous_var     | C                | ENSG00000187800 |
| 0 | PEPD,missense_variant,   | A                | ENSG00000124299 |
| 0 | PEPD,3_prime_UTR_var     | G                | ENSG00000124299 |
| 0 | PFKP,intron_variant,,ENS | G                | ENSG00000067057 |
| 0 | PFKP,intron_variant,,ENS | T                | ENSG00000067057 |
| 0 | PGAP1,intron_variant,,E  | A                | ENSG00000197121 |
| 0 | PGK1,intron_variant,,EN  | C                | ENSG00000102144 |
| 0 | PGLYRP2,missense_var     | T                | ENSG00000161031 |
| 0 | PGLYRP3,5_prime_UTR      | G                | ENSG00000159527 |
| 0 | PHF2,splice_region_vari  | T                | ENSG00000197724 |
| 0 | PHIP,intron_variant,,ENS | TTCATCTCTGATGGGA | ENSG00000146247 |
| 0 | PHKA1,intron_variant,,E  | -                | ENSG00000067177 |
| 0 | PHLDB1,intron_variant,,E | A                | ENSG00000019144 |
| 0 | PHRF1,synonymous_var     | A                | ENSG00000070047 |
| 0 | PIFO,3_prime_UTR_vari    | G                | ENSG00000173947 |
| 0 | PIGK,intron_variant,,ENS | C                | ENSG00000142892 |
| 0 | PIGN,synonymous_varia    | G                | ENSG00000197563 |
| 0 | PIGW,missense_variant,   | G                | ENSG00000184886 |
| 0 | PIK3R5,intron_variant,,E | G                | ENSG00000141506 |
| 0 | PIKFYVE,intron_variant,, | A                | ENSG00000115020 |
| 0 | PIM3,synonymous_varia    | A                | ENSG00000198355 |
| 1 | PIWIL3,5_prime_UTR_va    | G                | ENSG00000184571 |
| 0 | PJA1,synonymous_varia    | A                | ENSG00000181191 |
| 0 | PKD1L2,non_coding_trar   | C                | ENSG00000166473 |
| 1 | PKHD1,intron_variant,,E  | T                | ENSG00000170927 |
| 1 | PKP2,intron_variant,,ENS | C                | ENSG00000057294 |
| 0 | PLA2G7,intron_variant,,E | A                | ENSG00000146070 |
| 0 | PLAT,intron_variant,,ENS | T                | ENSG00000104368 |
| 0 | PLB1,intron_variant,,ENS | A                | ENSG00000163803 |
| 0 | PLCE1,intron_variant,,E  | A                | ENSG00000138193 |
| 0 | PLCE1,intron_variant,,E  | G                | ENSG00000138193 |

VEP annotated somatic variants

|   |                          |                  |                 |
|---|--------------------------|------------------|-----------------|
| 0 | PLCE1,intron_variant,,EN | T                | ENSG00000138193 |
| 0 | PLCE1,missense_variant   | T                | ENSG00000138193 |
| 0 | PLCG2,intron_variant,,E  | C                | ENSG00000197943 |
| 0 | PLCH2,intron_variant,,E  | G                | ENSG00000149527 |
| 0 | PLCH2,intron_variant,,E  | C                | ENSG00000149527 |
| 0 | PLEC,missense_variant,j  | C                | ENSG00000178209 |
| 0 | PLEC,synonymous_varia    | G                | ENSG00000178209 |
| 0 | PLEC,3_prime_UTR_var     | A                | ENSG00000178209 |
| 0 | PLEC,synonymous_varia    | A                | ENSG00000178209 |
| 0 | PLEC,synonymous_varia    | G                | ENSG00000178209 |
| 1 | PLEC,synonymous_varia    | G                | ENSG00000178209 |
| 0 | PLEKHG5,intron_variant,  | T                | ENSG00000171680 |
| 0 | PLEKHH1,intron_variant,  | T                | ENSG00000054690 |
| 0 | PLEKHH1,splice_region_   | C                | ENSG00000054690 |
| 0 | PLEKHH1,missense_vari    | G                | ENSG00000054690 |
| 0 | PLEKHN1,intron_variant,  | A                | ENSG00000187583 |
| 0 | PLK5,intron_variant,,ENS | G GCGTGGGGTCCCT  | ENSG00000185988 |
| 0 | PLXDC1,intron_variant,,E | A                | ENSG00000161381 |
| 0 | PLXNB2,intron_variant,,E | T                | ENSG00000196576 |
| 0 | PNISR,intron_variant,,EN | TATAATTTTAAACTAT | ENSG00000132424 |
| 0 | PNPLA1,missense_varia    | T                | ENSG00000180316 |
| 0 | PNPLA3,intron_variant,,E | C                | ENSG00000100344 |
| 0 | PNPLA6,synonymous_va     | A                | ENSG00000032444 |
| 0 | POC1B-GALNT4,intron_     | -                | ENSG00000259075 |
| 0 | POLR2G,intron_variant,,l | A                | ENSG00000168002 |
| 0 | POLR3F,intron_variant,,E | T                | ENSG00000132664 |
| 0 | POLR3F,intron_variant,,E | G                | ENSG00000132664 |
| 0 | POSTN,intron_variant,,E  | A                | ENSG00000133110 |
| 0 | POU5F1B,missense_vari    | C                | ENSG00000212993 |
| 0 | PPARG,missense_variar    | G                | ENSG00000132170 |
| 0 | PPARG,synonymous_val     | T                | ENSG00000132170 |
| 0 | PPIL2,intron_variant,,EN | C                | ENSG00000100023 |
| 0 | PPM1E,inframe_insertior  | GAACCC           | ENSG00000175175 |
| 0 | PPOX,intron_variant,,EN  | G                | ENSG00000143224 |
| 0 | PPP1R27,3_prime_UTR_     | A                | ENSG00000182676 |
| 0 | PPP2R2D,3_prime_UTR_     | C                | ENSG00000175470 |
| 0 | PPP2R3A,intron_variant,  | TGTTTTGTTT       | ENSG00000073711 |
| 0 | PQBP1,splice_region_va   | T                | ENSG00000102103 |
| 0 | PRDM5,intron_variant,,E  | A                | ENSG00000138738 |
| 0 | PRDM8,intron_variant,,E  | A                | ENSG00000152784 |
| 0 | PRDX4,intron_variant,,E  | C                | ENSG00000123131 |
| 0 | PRDX4,intron_variant,,E  | T                | ENSG00000123131 |
| 0 | PRDX4,intron_variant,,E  | C                | ENSG00000123131 |
| 0 | PREP,intron_variant,,EN  | G                | ENSG00000085377 |
| 0 | PREX2,intron_variant,,E  | G                | ENSG00000046889 |
| 0 | PRG2,intron_variant,,EN  | G                | ENSG00000186652 |
| 0 | PRIMPOL,5_prime_UTR_     | C                | ENSG00000164306 |
| 0 | PRKCD,intron_variant,,E  | A                | ENSG00000163932 |
| 1 | PRKCD,intron_variant,,E  | -                | ENSG00000163932 |
| 0 | PRKCZ,intron_variant,,E  | A                | ENSG00000067606 |
| 0 | PRMT5,intron_variant,,E  | A                | ENSG00000100462 |
| 0 | PRR22,missense_varian    | A                | ENSG00000212123 |
| 0 | PRR5,intron_variant,,EN  | T                | ENSG00000186654 |
| 0 | PRR5-ARHGAP8,intron_     | A                | ENSG00000248405 |
| 1 | PRSS36,intron_variant,,E | AAACAAAC         | ENSG00000178226 |

VEP annotated somatic variants

|   |                          |          |                 |
|---|--------------------------|----------|-----------------|
| 0 | PRUNE2,intron_variant,,I | -        | ENSG00000106772 |
| 1 | PSG2,intron_variant,,EN  | A        | ENSG00000242221 |
| 0 | PSG7,non_coding_transc   | A        | ENSG00000221878 |
| 0 | PSG9,stop_gained,p.Tyr   | C        | ENSG00000183668 |
| 0 | PSMD12,splice_region_v   | G        | ENSG00000197170 |
| 0 | PSMG1,intron_variant,,E  | C        | ENSG00000183527 |
| 0 | PSMG2,5_prime_UTR_v      | G        | ENSG00000128789 |
| 0 | PTGR1,intron_variant,,E  | A        | ENSG00000106853 |
| 0 | PTPRE,intron_variant,,E  | G        | ENSG00000132334 |
| 1 | PTPRF,intron_variant,,E  | A        | ENSG00000142949 |
| 0 | PTPRG,intron_variant,,E  | C        | ENSG00000144724 |
| 0 | PTPRK,intron_variant,,E  | G        | ENSG00000152894 |
| 0 | PTPRN2,synonymous_va     | A        | ENSG00000155093 |
| 0 | PTX4,intron_variant,,EN  | A        | ENSG00000251692 |
| 0 | PUM1,intron_variant,,EN  | G        | ENSG00000134644 |
| 0 | PUM1,intron_variant,,EN  | A        | ENSG00000134644 |
| 0 | PUM1,intron_variant,,EN  | C        | ENSG00000134644 |
| 0 | PUM1,intron_variant,,EN  | GC       | ENSG00000134644 |
| 0 | PYGO1,intron_variant,,E  | A        | ENSG00000171016 |
| 0 | PYROXD1,5_prime_UTR      | C        | ENSG00000121350 |
| 0 | RAB11FIP4,intron_variar  | G        | ENSG00000131242 |
| 0 | RAB17,missense_variant   | G        | ENSG00000124839 |
| 0 | RAB38,missense_variant   | A        | ENSG00000123892 |
| 0 | RAB41,intron_variant,,E  | G        | ENSG00000147127 |
| 0 | RABEP1,intron_variant,,E | A        | ENSG00000029725 |
| 0 | RABGGTA,synonymous_      | A        | ENSG00000100949 |
| 0 | RAC3,intron_variant,,EN  | TTCCACG  | ENSG00000169750 |
| 0 | RAD51B,intron_variant,,E | G        | ENSG00000182185 |
| 0 | RADIL,synonymous_vari    | G        | ENSG00000157927 |
| 0 | RAF1,intron_variant,,EN  | A        | ENSG00000132155 |
| 0 | RAI14,intron_variant,,EN | A        | ENSG00000039560 |
| 0 | RAP1GAP,intron_variant   | A        | ENSG00000076864 |
| 0 | RAPGEF3,intron_variant   | C        | ENSG00000079337 |
| 0 | RAPSN,intron_variant,,E  | -        | ENSG00000165917 |
| 0 | RASSF1,missense_varia    | T        | ENSG00000068028 |
| 0 | RBM10,synonymous_var     | C        | ENSG00000182872 |
| 1 | RBM26,intron_variant,,E  | A        | ENSG00000139746 |
| 0 | RBM27,intron_variant,,E  | T        | ENSG00000091009 |
| 0 | RBPMS,5_prime_UTR_v      | C        | ENSG00000157110 |
| 1 | RECK,synonymous_vari     | G        | ENSG00000122707 |
| 0 | RELB,intron_variant,,EN  | -        | ENSG00000104856 |
| 0 | REPS1,intron_variant,,E  | G        | ENSG00000135597 |
| 0 | RETNLB,stop_gained,p.L   | GGGGATTA | ENSG00000163515 |
| 0 | RFPL1,5_prime_UTR_va     | G        | ENSG00000128250 |
| 0 | RFT1,synonymous_varia    | C        | ENSG00000163933 |
| 0 | RFT1,intron_variant,,EN  | A        | ENSG00000163933 |
| 0 | RFTN1,intron_variant,,E  | C        | ENSG00000131378 |
| 0 | RGL3,5_prime_UTR_var     | T        | ENSG00000205517 |
| 0 | RGS7,splice_region_vari  | C        | ENSG00000182901 |
| 0 | RIBC2,5_prime_UTR_va     | A        | ENSG00000128408 |
| 0 | RIPK4,synonymous_vari    | T        | ENSG00000183421 |
| 0 | RMND5A,intron_variant,,  | AA       | ENSG00000153561 |
| 0 | RMND5A,5_prime_UTR_      | T        | ENSG00000153561 |
| 0 | RNASEH2A,intron_variar   | T        | ENSG00000104889 |
| 0 | RNASEL,synonymous_va     | T        | ENSG00000135828 |



VEP annotated somatic variants

|   |                                       |    |                 |
|---|---------------------------------------|----|-----------------|
| 0 | RND2,3_prime_UTR_var                  | T  | ENSG00000108830 |
| 0 | RNF175,intron_variant,,E              | -  | ENSG00000145428 |
| 0 | RNF19B,intron_variant,,E              | A  | ENSG00000116514 |
| 0 | RNF222,3_prime_UTR_v                  | T  | ENSG00000189051 |
| 0 | ROBO1,intron_variant,,E               | C  | ENSG00000169855 |
| 0 | ROBO1,intron_variant,,E               | A  | ENSG00000169855 |
| 0 | ROCK2,missense_varian                 | T  | ENSG00000134318 |
| 0 | ROR1,3_prime_UTR_var                  | A  | ENSG00000185483 |
| 0 | ROS1,intron_variant,,EN               | G  | ENSG00000047936 |
| 0 | RP1-130H16.18,intron_v                | T  | ENSG00000248751 |
| 0 | LMO7,5_prime_UTR_var                  | C  | ENSG00000228444 |
| 0 | CC2D2B,5_prime_UTR_                   | A  | ENSG00000269948 |
| 0 | RP11-551L14.1,intron_v                | C  | ENSG00000177359 |
| 0 | FHAD1,intron_variant,,E               | A  | ENSG00000233485 |
| 0 | RPAP3,intron_variant,,E               | T  | ENSG00000005175 |
| 0 | RPH3AL,intron_variant,,E              | A  | ENSG00000181031 |
| 0 | RPL18A,intron_variant,,E              | C  | ENSG00000105640 |
| 0 | RPL23A,5_prime_UTR_v                  | CC | ENSG00000198242 |
| 0 | RPL23A,5_prime_UTR_vAAATGAGCAGGGATTT/ |    | ENSG00000198242 |
| 0 | RPL3,synonymous_varia                 | T  | ENSG00000100316 |
| 0 | RPS4X,synonymous_var                  | T  | ENSG00000198034 |
| 0 | RPS6KA2,intron_variant,               | G  | ENSG00000071242 |
| 0 | RPTOR,missense_variar                 | T  | ENSG00000141564 |
| 0 | RPTOR,synonymous_val                  | T  | ENSG00000141564 |
| 0 | RRP1B,intron_variant,,E               | A  | ENSG00000160208 |
| 0 | RRP1B,synonymous_var                  | A  | ENSG00000160208 |
| 0 | RSAD1,synonymous_var                  | G  | ENSG00000136444 |
| 0 | RSU1,intron_variant,,EN               | C  | ENSG00000148484 |
| 0 | RTN3,missense_variant,                | C  | ENSG00000133318 |
| 0 | RUFY1,5_prime_UTR_v                   | T  | ENSG00000176783 |
| 2 | RUFY1,synonymous_var                  | C  | ENSG00000176783 |
| 0 | RUFY2,5_prime_UTR_v                   | C  | ENSG00000204130 |
| 1 | RXRA,intron_variant,,EN               | A  | ENSG00000186350 |
| 0 | RYR1,synonymous_varia                 | T  | ENSG00000196218 |
| 0 | RYR1,intron_variant,,EN               | A  | ENSG00000196218 |
| 0 | RYR1,synonymous_varia                 | T  | ENSG00000196218 |
| 0 | RYR1,intron_variant,,EN               | A  | ENSG00000196218 |
| 0 | RYR2,intron_variant,,EN               | A  | ENSG00000198626 |
| 0 | RYR2,intron_variant,,EN               | T  | ENSG00000198626 |
| 0 | RYR3,intron_variant,,EN               | A  | ENSG00000198838 |
| 0 | SAP18,intron_variant,,E               | G  | ENSG00000150459 |
| 0 | SARDH,intron_variant,,E               | A  | ENSG00000123453 |
| 0 | SBDS,intron_variant,,EN               | C  | ENSG00000126524 |
| 0 | SBF1,synonymous_varia                 | G  | ENSG00000100241 |
| 0 | SBF2,intron_variant,,EN               | A  | ENSG00000133812 |
| 0 | SCAF1,intron_variant,,E               | T  | ENSG00000126461 |
| 0 | SCAMP3,synonymous_v                   | T  | ENSG00000116521 |
| 0 | SCARF2,intron_variant,,E              | T  | ENSG00000244486 |
| 0 | SCEL,intron_variant,,EN               | C  | ENSG00000136155 |
| 0 | SCIN,missense_variant,p               | G  | ENSG00000006747 |
| 0 | SCLT1,intron_variant,,EN              | A  | ENSG00000151466 |
| 0 | SCLT1,intron_variant,,EN              | A  | ENSG00000151466 |
| 0 | SCML4,3_prime_UTR_v                   | C  | ENSG00000146285 |
| 0 | SCN3A,intron_variant,,E               | T  | ENSG00000153253 |
| 0 | SCN9A,missense_varian                 | G  | ENSG00000169432 |

VEP annotated somatic variants

|   |                           |                |                 |
|---|---------------------------|----------------|-----------------|
| 1 | SCN9A,intron_variant,,E   | T              | ENSG00000169432 |
| 0 | SDE2,upstream_gene_v      | T              | ENSG00000143751 |
| 0 | SDK1,intron_variant,,E    | C              | ENSG00000146555 |
| 0 | SEC13,intron_variant,,E   | T              | ENSG00000157020 |
| 0 | SEC14L6,missense_vari     | A              | ENSG00000214491 |
| 0 | SEC16B,intron_variant,,E  | A              | ENSG00000120341 |
| 0 | SEC23B,missense_varia     | G              | ENSG00000101310 |
| 0 | SEC24D,intron_variant,,E  | A              | ENSG00000150961 |
| 0 | SEC31B,intron_variant,,E  | -              | ENSG00000075826 |
| 0 | SEC31B,intron_variant,,E  | G              | ENSG00000075826 |
| 0 | SEC31B,missense_varia     | G              | ENSG00000075826 |
| 0 | SEC31B,intron_variant,,E  | T              | ENSG00000075826 |
| 0 | SECISBP2,intron_variant   | T              | ENSG00000187742 |
| 0 | SECTM1,missense_varia     | C              | ENSG00000141574 |
| 0 | SELE,intron_variant,,E    | G              | ENSG00000007908 |
| 0 | SELP,intron_variant,,E    | A              | ENSG00000174175 |
| 0 | SEMA3A,intron_variant,,I  | C              | ENSG00000075213 |
| 0 | SEMA3A,intron_variant,,I  | G              | ENSG00000075213 |
| 0 | SEMA3F,intron_variant,,I  | G              | ENSG00000001617 |
| 0 | SEPT3,3_prime_UTR_va      | A              | ENSG00000100167 |
| 0 | SERPINA3,intron_variant   | C              | ENSG00000196136 |
| 0 | SERTAD1,intron_variant,   | C              | ENSG00000197019 |
| 0 | SETD1B,intron_variant,,E  | A              | ENSG00000139718 |
| 0 | SETD1B,intron_variant,,E  | A              | ENSG00000139718 |
| 0 | SETD5,intron_variant,,E   | A              | ENSG00000168137 |
| 0 | SEZ6L,synonymous_vari     | C              | ENSG00000100095 |
| 0 | SF3B3,intron_variant,,E   | A              | ENSG00000189091 |
| 0 | SF3B5,5_prime_UTR_va      | A              | ENSG00000169976 |
| 0 | SGPL1,intron_variant,,E   | -              | ENSG00000166224 |
| 0 | SGSM2,intron_variant,,E   | C              | ENSG00000141258 |
| 0 | SGSM2,intron_variant,,E   | C              | ENSG00000141258 |
| 1 | SGSM3,intron_variant,,E   | A              | ENSG00000100359 |
| 0 | SH3GLB1,3_prime_UTR       | A              | ENSG00000097033 |
| 0 | SH3PXD2A,synonymous       | C              | ENSG00000107957 |
| 0 | SHANK1,intron_variant,,I  | T              | ENSG00000161681 |
| 0 | SHANK1,splice_region_v    | T              | ENSG00000161681 |
| 0 | SHH,intron_variant,,E     | T              | ENSG00000164690 |
| 0 | SHROOM2,missense_va       | A              | ENSG00000146950 |
| 0 | SIGLEC12,intron_variant   | T              | ENSG00000254521 |
| 0 | SIK1,intron_variant,,E    | AACTATATCAAAGT | ENSG00000142178 |
| 0 | SIM2,splice_region_varia  | C              | ENSG00000159263 |
| 0 | SIPA1L2,intron_variant,,E | C              | ENSG00000116991 |
| 0 | SLAMF7,intron_variant,,E  | T              | ENSG00000026751 |
| 0 | SLC10A4,synonymous_v      | A              | ENSG00000145248 |
| 0 | SLC10A6,missense_vari     | C              | ENSG00000145283 |
| 0 | SLC12A7,intron_variant,,  | A              | ENSG00000113504 |
| 0 | SLC13A1,intron_variant,,  | G              | ENSG00000081800 |
| 0 | SLC16A2,missense_vari     | C              | ENSG00000147100 |
| 0 | SLC1A6,intron_variant,,E  | T              | ENSG00000105143 |
| 0 | SLC1A6,intron_variant,,E  | A              | ENSG00000105143 |
| 0 | SLC22A5,synonymous_v      | C              | ENSG00000197375 |
| 0 | SLC23A1,intron_variant,,  | T              | ENSG00000170482 |
| 0 | SLC24A4,synonymous_v      | C              | ENSG00000140090 |
| 0 | SLC25A13,intron_variant   | ATGATGTTGTC    | ENSG00000004864 |
| 0 | SLC25A39,intron_variant   | T              | ENSG00000013306 |

VEP annotated somatic variants

|   |                          |   |                 |
|---|--------------------------|---|-----------------|
| 0 | SLC25A39,intron_variant  | T | ENSG00000013306 |
| 0 | SLC26A11,intron_variant  | T | ENSG00000181045 |
| 0 | SLC28A1,intron_variant,, | C | ENSG00000156222 |
| 0 | SLC28A2,intron_variant,, | - | ENSG00000137860 |
| 0 | SLC2A8,intron_variant,,E | T | ENSG00000136856 |
| 0 | SLC35B4,intron_variant,, | A | ENSG00000205060 |
| 0 | SLC35F1,intron_variant,, | A | ENSG00000196376 |
| 0 | SLC35F3,intron_variant,, | A | ENSG00000183780 |
| 0 | SLC37A2,intron_variant,, | G | ENSG00000134955 |
| 0 | SLC38A3,intron_variant,, | G | ENSG00000188338 |
| 0 | SLC38A7,intron_variant,, | T | ENSG00000103042 |
| 0 | SLC45A4,synonymous_v     | A | ENSG00000022567 |
| 0 | SLC4A2,intron_variant,,E | A | ENSG00000164889 |
| 0 | SLC5A5,intron_variant,,E | G | ENSG00000105641 |
| 0 | SLC6A14,intron_variant,, | G | ENSG00000087916 |
| 0 | SLC6A16,intron_variant,, | T | ENSG00000063127 |
| 0 | SLC6A4,5_prime_UTR_v     | T | ENSG00000108576 |
| 0 | SLC6A9,3_prime_UTR_v     | A | ENSG00000196517 |
| 0 | SLC7A8,intron_variant,,E | T | ENSG00000092068 |
| 0 | SLC7A8,synonymous_va     | A | ENSG00000092068 |
| 0 | SLC9A7,synonymous_va     | G | ENSG00000065923 |
| 0 | SLCO2A1,intron_variant,  | - | ENSG00000174640 |
| 0 | SMARCA1,intron_variant   | A | ENSG00000102038 |
| 0 | SMARCA5,intron_variant   | - | ENSG00000153147 |
| 0 | SMC1B,intron_variant,,E  | T | ENSG00000077935 |
| 0 | SMOC1,synonymous_va      | A | ENSG00000198732 |
| 0 | SMTN,intron_variant,,EN  | A | ENSG00000183963 |
| 0 | SMYD3,splice_region_va   | T | ENSG00000185420 |
| 0 | SORBS1,intron_variant,,I | A | ENSG00000095637 |
| 0 | SORCS2,splice_region_v   | A | ENSG00000184985 |
| 2 | SPAG17,synonymous_va     | G | ENSG00000155761 |
| 0 | SPAG17,synonymous_va     | A | ENSG00000155761 |
| 0 | SPANXN2,synonymous_v     | T | ENSG00000203924 |
| 0 | PARP10,5_prime_UTR_v     | A | ENSG00000186583 |
| 2 | SPEG,intron_variant,,EN  | G | ENSG00000072195 |
| 0 | SPEG,missense_variant,   | G | ENSG00000072195 |
| 1 | SPINT2,missense_variar   | C | ENSG00000167642 |
| 0 | SPOCK2,synonymous_va     | T | ENSG00000107742 |
| 0 | SPTBN5,intron_variant,,E | T | ENSG00000137877 |
| 0 | SPTBN5,intron_variant,,E | A | ENSG00000137877 |
| 1 | SRCAP,missense_varian    | G | ENSG00000080603 |
| 0 | SSPO,non_coding_trans    | T | ENSG00000197558 |
| 0 | SSPO,intron_variant,,EN  | T | ENSG00000197558 |
| 0 | SSPO,non_coding_trans    | C | ENSG00000197558 |
| 0 | SSUH2,intron_variant,,E  | - | ENSG00000125046 |
| 0 | ST3GAL2,3_prime_UTR_     | T | ENSG00000157350 |
| 0 | ST6GALNAC2,intron_var    | A | ENSG00000070731 |
| 0 | ST6GALNAC2,intron_var    | G | ENSG00000070731 |
| 0 | ST6GALNAC4,intron_var    | - | ENSG00000136840 |
| 0 | STAB2,synonymous_vari    | C | ENSG00000136011 |
| 0 | STAMPB,intron_variant,,I | - | ENSG00000124356 |
| 0 | STAP1,synonymous_vari    | T | ENSG00000035720 |
| 0 | STARD9,intron_variant,,E | A | ENSG00000159433 |
| 0 | STAT4,intron_variant,,EN | G | ENSG00000138378 |
| 0 | STAT5B,intron_variant,,E | - | ENSG00000173757 |

VEP annotated somatic variants

|   |                          |              |                  |
|---|--------------------------|--------------|------------------|
| 0 | STAU2,intron_variant,,E  | G            | ENSG00000040341  |
| 0 | STOML1,synonymous_v      | C            | ENSG000000067221 |
| 0 | STRA13,5_prime_UTR_      | A            | ENSG00000169689  |
| 0 | STRA8,downstream_gen     | T            | ENSG00000146857  |
| 0 | STRBP,intron_variant,,E  | -            | ENSG00000165209  |
| 0 | STRIP1,intron_variant,,E | G            | ENSG00000143093  |
| 0 | STRIP2,intron_variant,,E | G            | ENSG00000128578  |
| 0 | STXBP5,intron_variant,,E | C            | ENSG00000164506  |
| 0 | STYK1,missense_variant   | C            | ENSG00000060140  |
| 0 | STYXL1,downstream_ge     | A            | ENSG00000127952  |
| 0 | SUCNR1,3_prime_UTR_      | A            | ENSG00000198829  |
| 0 | SUMO3,missense_variar    | C            | ENSG00000184900  |
| 0 | SUMO4,missense_variar    | A            | ENSG00000177688  |
| 0 | SUPT5H,intron_variant,,E | A            | ENSG00000196235  |
| 0 | SUPT5H,intron_variant,,E | T            | ENSG00000196235  |
| 0 | SUSD3,intron_variant,,E  | G            | ENSG00000157303  |
| 0 | SWAP70,intron_variant,,E | G            | ENSG00000133789  |
| 0 | SYMPK,synonymous_var     | C            | ENSG00000125755  |
| 0 | SYN2,intron_variant,,E   | T            | ENSG00000157152  |
| 0 | SYNE2,synonymous_var     | C            | ENSG00000054654  |
| 0 | SYNE2,intron_variant,,E  | C            | ENSG00000054654  |
| 0 | SYNJ2,synonymous_vari    | T            | ENSG00000078269  |
| 0 | SYNM,missense_variant,   | T            | ENSG00000182253  |
| 0 | SYNPO2,missense_varia    | C            | ENSG00000172403  |
| 0 | TAB2,synonymous_varia    | A            | ENSG00000055208  |
| 0 | TAB2,intron_variant,,E   | T            | ENSG00000055208  |
| 1 | TACC3,missense_varian    | A            | ENSG00000013810  |
| 0 | TAF7L,intron_variant,,E  | C            | ENSG00000102387  |
| 0 | TAGAP,intron_variant,,E  | T            | ENSG00000164691  |
| 0 | TAGAP,synonymous_var     | A            | ENSG00000164691  |
| 0 | TARSL2,intron_variant,,E | T            | ENSG00000185418  |
| 0 | TARSL2,intron_variant,,E | C            | ENSG00000185418  |
| 0 | TATDN2,missense_varia    | A            | ENSG00000157014  |
| 0 | TATDN2,intron_variant,,E | T            | ENSG00000157014  |
| 0 | TBC1D22A,missense_va     | T            | ENSG00000054611  |
| 0 | TBC1D4,intron_variant,,E | T            | ENSG00000136111  |
| 0 | TBC1D5,missense_varia    | C            | ENSG00000131374  |
| 0 | TBCK,intron_variant,,E   | G            | ENSG00000145348  |
| 0 | TBX10,intron_variant,,E  | A            | ENSG00000167800  |
| 0 | TCEAL2,missense_varia    | C            | ENSG00000184905  |
| 0 | TCEB3,missense_varian    | C            | ENSG00000011007  |
| 1 | TCERG1,intron_variant,,E | T            | ENSG00000113649  |
| 0 | TCN2,3_prime_UTR_var     | T            | ENSG00000185339  |
| 0 | TDRD9,synonymous_var     | T            | ENSG00000156414  |
| 0 | TENM1,intron_variant,,E  | -            | ENSG00000009694  |
| 0 | TENM2,intron_variant,,E  | T            | ENSG00000145934  |
| 0 | TERF2,intron_variant,,E  | G            | ENSG00000132604  |
| 0 | TET3,intron_variant,,E   | GACATGCCCCAC | ENSG00000187605  |
| 0 | TEX14,intron_variant,,E  | T            | ENSG00000121101  |
| 0 | TEX2,intron_variant,,E   | C            | ENSG00000136478  |
| 0 | TEX26,splice_acceptor_   | A            | ENSG00000175664  |
| 0 | TFB1M,synonymous_var     | T            | ENSG00000029639  |
| 0 | TFDP3,missense_variant   | T            | ENSG00000183434  |
| 0 | TFPT,intron_variant,,E   | A            | ENSG00000105619  |
| 0 | TGFBR3,intron_variant,,E | G            | ENSG00000069702  |

VEP annotated somatic variants

|   |                                       |   |                 |
|---|---------------------------------------|---|-----------------|
| 0 | TGIF2LX,missense_varia                | A | ENSG00000153779 |
| 0 | TGM7,synonymous_varia                 | G | ENSG00000159495 |
| 0 | THBS2,intron_variant,,E               | A | ENSG00000186340 |
| 0 | THEG,intron_variant,,EN               | - | ENSG00000105549 |
| 0 | THSD7A,synonymous_va                  | C | ENSG00000005108 |
| 0 | THTPA,3_prime_UTR_va                  | C | ENSG00000259431 |
| 0 | THUMPD2,intron_variant                | - | ENSG00000138050 |
| 0 | TIAM1,intron_variant,,EN              | A | ENSG00000156299 |
| 0 | TIAM2,intron_variant,,EN              | A | ENSG00000146426 |
| 0 | TICAM1,synonymous_va                  | A | ENSG00000127666 |
| 0 | TIMM21,3_prime_UTR_v                  | C | ENSG00000075336 |
| 0 | TKT,intron_variant,,ENS               | C | ENSG00000163931 |
| 0 | TKT,intron_variant,,ENS               | T | ENSG00000163931 |
| 0 | TLCD1,5_prime_UTR_va                  | A | ENSG00000160606 |
| 0 | TLE3,synonymous_varia                 | T | ENSG00000140332 |
| 0 | TLE3,intron_variant,,ENS              | C | ENSG00000140332 |
| 0 | TLK2,intron_variant,,ENS              | A | ENSG00000146872 |
| 0 | TLL1,missense_variant,p               | G | ENSG00000038295 |
| 0 | TLL2,intron_variant,,ENS              | C | ENSG00000095587 |
| 0 | TLL2,intron_variant,,ENS              | G | ENSG00000095587 |
| 0 | TLL2,synonymous_varia                 | A | ENSG00000095587 |
| 0 | TLN2,intron_variant,,ENS              | - | ENSG00000171914 |
| 0 | TLX2,5_prime_UTR_vari                 | T | ENSG00000115297 |
| 0 | TMED6,missense_varian                 | G | ENSG00000157315 |
| 0 | TMEM131,intron_variant,               | A | ENSG00000075568 |
| 0 | TMEM140,missense_var                  | A | ENSG00000146859 |
| 0 | TMEM150C,intron_variar                | C | ENSG00000249242 |
| 0 | TMEM185A,3_prime_UT                   | C | ENSG00000155984 |
| 0 | TMEM216,intron_variant,               | - | ENSG00000187049 |
| 0 | TMEM220,synonymous_                   | G | ENSG00000187824 |
| 0 | TMPRSS11A,3_prime_U                   | T | ENSG00000187054 |
| 0 | TNFAIP3,intron_variant,,I             | C | ENSG00000118503 |
| 0 | TNFSF8,synonymous_va                  | T | ENSG00000106952 |
| 0 | TNRC18,synonymous_va                  | G | ENSG00000182095 |
| 0 | TNS4,intron_variant,,ENS              | A | ENSG00000131746 |
| 0 | TNS4,missense_variant,I               | T | ENSG00000131746 |
| 0 | TP53BP1,missense_varia                | C | ENSG00000067369 |
| 0 | TP53BP1,missense_varia                | G | ENSG00000067369 |
| 0 | TP53BP1,intron_variant,,              | G | ENSG00000067369 |
| 0 | TPGS2,synonymous_var                  | T | ENSG00000134779 |
| 0 | TPM4,5_prime_UTR_variGAAGTACCCAGGGTAC |   | ENSG00000167460 |
| 0 | TPPP,intron_variant,,ENS              | G | ENSG00000171368 |
| 0 | TPPP,synonymous_varia                 | C | ENSG00000171368 |
| 0 | TPRG1,splice_region_va                | A | ENSG00000188001 |
| 0 | TRAPPC6A,intron_variar                | T | ENSG00000007255 |
| 0 | TRAPPC6B,intron_variar                | T | ENSG00000182400 |
| 0 | TRAPPC6B,intron_variar                | C | ENSG00000182400 |
| 0 | TRERF1,missense_varia                 | T | ENSG00000124496 |
| 0 | TREX2,intron_variant,,E               | C | ENSG00000183479 |
| 0 | TRIM15,intron_variant,,E              | T | ENSG00000204610 |
| 0 | TRIM27,intron_variant,,E              | A | ENSG00000204713 |
| 0 | TRIM46,intron_variant,,E              | A | ENSG00000163462 |
| 1 | TRIM62,intron_variant,,E              | T | ENSG00000116525 |
| 0 | TRIM67,missense_variar                | G | ENSG00000119283 |
| 1 | TRIM9,splice_region_var               | T | ENSG00000100505 |

VEP annotated somatic variants

|   |                          |                |                 |
|---|--------------------------|----------------|-----------------|
| 0 | TRIM9,intron_variant,,EN | CACACAGGTGTTTT | ENSG00000100505 |
| 0 | TRIO,synonymous_varia    | C              | ENSG00000038382 |
| 0 | TRIP6,missense_variant,  | T              | ENSG00000087077 |
| 0 | TRMT1,synonymous_var     | C              | ENSG00000104907 |
| 0 | TRMT2B,intron_variant,,I | C              | ENSG00000188917 |
| 0 | TRPC4AP,intron_variant,  | T              | ENSG00000100991 |
| 1 | TRPM1,intron_variant,,El | C              | ENSG00000134160 |
| 0 | TRPM5,missense_varian    | A              | ENSG00000070985 |
| 0 | TRPM7,intron_variant,,El | G              | ENSG00000092439 |
| 0 | TRPV4,intron_variant,,EM | A              | ENSG00000111199 |
| 0 | TSC1,missense_variant,,I | G              | ENSG00000165699 |
| 0 | TSC1,intron_variant,,ENS | A              | ENSG00000165699 |
| 0 | TSC2,intron_variant,,ENS | A              | ENSG00000103197 |
| 1 | TSPAN1,intron_variant,,E | G              | ENSG00000117472 |
| 0 | TSPAN6,missense_varia    | T              | ENSG00000000003 |
| 0 | TSPAN7,intron_variant,,E | G              | ENSG00000156298 |
| 0 | TSSK2,synonymous_vari    | A              | ENSG00000206203 |
| 0 | TTBK1,intron_variant,,EM | C              | ENSG00000146216 |
| 0 | TTBK1,missense_variant   | C              | ENSG00000146216 |
| 0 | TTC18,intron_variant,,EM | T              | ENSG00000156042 |
| 0 | TTC19,3_prime_UTR_va     | A              | ENSG00000011295 |
| 0 | TTC28,missense_variant   | T              | ENSG00000100154 |
| 0 | TTC40,intron_variant,,EM | T              | ENSG00000171811 |
| 0 | TTC40,5_prime_UTR_va     | C              | ENSG00000171811 |
| 0 | TTC40,intron_variant,,EM | C              | ENSG00000171811 |
| 0 | TTC40,synonymous_vari    | G              | ENSG00000171811 |
| 0 | TTC40,intron_variant,,EM | C              | ENSG00000171811 |
| 0 | TTL1,splice_region_vari  | T              | ENSG00000100271 |
| 0 | TTL6,synonymous_varia    | G              | ENSG00000170703 |
| 0 | TUB,intron_variant,,ENS  | G              | ENSG00000166402 |
| 0 | TUBGCP5,3_prime_UTR      | G              | ENSG00000153575 |
| 0 | TUBGCP6,intron_variant   | T              | ENSG00000128159 |
| 0 | TULP4,synonymous_vari    | G              | ENSG00000130338 |
| 0 | TULP4,intron_variant,,EM | C              | ENSG00000130338 |
| 0 | TWF1,intron_variant,,EN  | G              | ENSG00000151239 |
| 0 | TYMP,intron_variant,,EN  | T              | ENSG00000025708 |
| 0 | UBASH3A,intron_variant,  | G              | ENSG00000160185 |
| 0 | UBASH3B,intron_variant,  | A              | ENSG00000154127 |
| 0 | UBE3C,synonymous_var     | C              | ENSG00000009335 |
| 0 | UBR4,3_prime_UTR_var     | A              | ENSG00000127481 |
| 0 | UBXN2B,intron_variant,,I | C              | ENSG00000215114 |
| 0 | UCP3,intron_variant,,EN  | A              | ENSG00000175564 |
| 0 | UHRF1,non_coding_tran    | T              | ENSG00000034063 |
| 0 | UHRF2,intron_variant,,El | A              | ENSG00000147854 |
| 0 | ULK4,splice_region_vari  | G              | ENSG00000168038 |
| 0 | UMODL1,intron_variant,,  | T              | ENSG00000177398 |
| 1 | UMODL1,missense_varia    | A              | ENSG00000177398 |
| 0 | UMODL1,splice_region_v   | T              | ENSG00000177398 |
| 0 | UNC45B,intron_variant,,E | A              | ENSG00000141161 |
| 0 | UNKL,intron_variant,,EN  | G              | ENSG00000059145 |
| 0 |                          | A              |                 |
| 0 | UPB1,synonymous_varia    | A              | ENSG00000100024 |
| 0 | UPRT,intron_variant,,EN  | T              | ENSG00000094841 |
| 0 | USH2A,missense_varian    | T              | ENSG00000042781 |
| 1 | USHBP1,synonymous_v      | C              | ENSG00000130307 |

VEP annotated somatic variants

|   |                          |            |                 |
|---|--------------------------|------------|-----------------|
| 0 | USP10,stop_gained,p.Ph   | AGCTCAGTTC | ENSG00000103194 |
| 0 | USP11,synonymous_vari    | T          | ENSG00000102226 |
| 1 | USP18,intron_variant,,E  | G          | ENSG00000184979 |
| 0 | USP20,intron_variant,,E  | G          | ENSG00000136878 |
| 0 | USP22,3_prime_UTR_va     | T          | ENSG00000124422 |
| 0 | USP34,intron_variant,,E  | T          | ENSG00000115464 |
| 0 | UTP15,intron_variant,,E  | T          | ENSG00000164338 |
| 0 | UTP20,intron_variant,,E  | C          | ENSG00000120800 |
| 0 | UTP20,intron_variant,,E  | A          | ENSG00000120800 |
| 0 | UTY,intron_variant,,ENS  | T          | ENSG00000183878 |
| 0 | VIM,intron_variant,,ENST | A          | ENSG00000026025 |
| 0 | VIPR2,missense_variant,  | T          | ENSG00000106018 |
| 0 | VRK2,intron_variant,,ENS | G          | ENSG00000028116 |
| 0 | VTI1B,missense_variant,  | T          | ENSG00000100568 |
| 0 | WBSCR22,intron_variant   | -          | ENSG00000071462 |
| 0 | WBSCR22,intron_variant   | G          | ENSG00000071462 |
| 0 | WBSCR27,missense_va      | A          | ENSG00000165171 |
| 0 | WDFY4,intron_variant,,E  | C          | ENSG00000128815 |
| 0 | WDR11,intron_variant,,E  | T          | ENSG00000120008 |
| 0 | WDR11,synonymous_va      | A          | ENSG00000120008 |
| 0 | WDR11,intron_variant,,E  | T          | ENSG00000120008 |
| 0 | WDR11,synonymous_va      | A          | ENSG00000120008 |
| 0 | WDR11,intron_variant,,E  | T          | ENSG00000120008 |
| 0 | WDR17,intron_variant,,E  | G          | ENSG00000150627 |
| 0 | WDR26,intron_variant,,E  | A          | ENSG00000162923 |
| 1 | WDR43,intron_variant,,E  | T          | ENSG00000163811 |
| 0 | WDR48,intron_variant,,E  | A          | ENSG00000114742 |
| 0 | WDR60,intron_variant,,E  | C          | ENSG00000126870 |
| 0 | WDR87,inframe_deletion   | -          | ENSG00000171804 |
| 0 | WDR91,intron_variant,,E  | C          | ENSG00000105875 |
| 0 | WIPI2,intron_variant,,EN | A          | ENSG00000157954 |
| 0 | WNK1,missense_variant    | A          | ENSG00000060237 |
| 0 | WNT2B,synonymous_va      | G          | ENSG00000134245 |
| 0 | WNT8B,missense_variar    | C          | ENSG00000075290 |
| 0 | WRNIP1,intron_variant,,E | G          | ENSG00000124535 |
| 0 | WSB2,intron_variant,,EN  | T          | ENSG00000176871 |
| 1 | WWC1,intron_variant,,E   | C          | ENSG00000113645 |
| 0 | WWP2,synonymous_vari     | T          | ENSG00000198373 |
| 0 | XAB2,intron_variant,,ENS | T          | ENSG00000076924 |
| 0 | XKR8,3_prime_UTR_var     | A          | ENSG00000158156 |
| 0 | XPNPEP1,intron_variant,  | C          | ENSG00000108039 |
| 0 | XPNPEP3,intron_variant,  | A          | ENSG00000196236 |
| 0 | XPO5,splice_region_vari  | C          | ENSG00000124571 |
| 0 | XRCC1,synonymous_var     | C          | ENSG00000073050 |
| 0 | XRCC1,intron_variant,,E  | T          | ENSG00000073050 |
| 0 | YBX2,intron_variant,,ENS | T          | ENSG00000006047 |
| 0 | YY1AP1,3_prime_UTR_\     | G          | ENSG00000163374 |
| 0 | YY1AP1,synonymous_va     | C          | ENSG00000163374 |
| 0 | ZBTB2,synonymous_vari    | T          | ENSG00000181472 |
| 0 | ZC2HC1B,intron_variant,  | G          | ENSG00000118491 |
| 0 | ZC3H12D,3_prime_UTR.     | G          | ENSG00000178199 |
| 0 | ZC3H12D,intron_variant,  | G          | ENSG00000178199 |
| 0 | ZC3H12D,5_prime_UTR.     | A          | ENSG00000178199 |
| 0 | ZC3H3,intron_variant,,E  | T          | ENSG00000014164 |
| 0 | ZC3H7B,intron_variant,,E | T          | ENSG00000100403 |

VEP annotated somatic variants

|   |                          |      |                 |
|---|--------------------------|------|-----------------|
| 0 | ZCCHC18,synonymous_v     | G    | ENSG00000166707 |
| 0 | ZDHC16,missense_var      | T    | ENSG00000171307 |
| 0 | ZDHC6,synonymous_v       | A    | ENSG00000023041 |
| 0 | ZDHC7,intron_variant,,l  | T    | ENSG00000153786 |
| 0 | ZFAND2A,intron_variant,  | C    | ENSG00000178381 |
| 0 | ZFH2,missense_varian     | G    | ENSG00000136367 |
| 0 | ZFPM2,intron_variant,,E  | T    | ENSG00000169946 |
| 0 | ZFYVE19,3_prime_UTR_     | C    | ENSG00000166140 |
| 0 | ZKSCAN5,5_prime_UTR      | T    | ENSG00000196652 |
| 0 | ZMYND10,intron_variant,  | G    | ENSG00000004838 |
| 0 | ZMYND10,intron_variant,  | A    | ENSG00000004838 |
| 0 | ZNF185,intron_variant,,E | A    | ENSG00000147394 |
| 0 | ZNF275,splice_region_va  | T    | ENSG00000063587 |
| 0 | ZNF304,missense_variar   | C    | ENSG00000131845 |
| 0 | ZNF324,intron_variant,,E | T    | ENSG00000083812 |
| 0 | ZNF365,intron_variant,,E | A    | ENSG00000138311 |
| 0 | ZNF414,3_prime_UTR_v     | G    | ENSG00000133250 |
| 0 | ZNF420,intron_variant,,E | T    | ENSG00000197050 |
| 0 | ZNF432,synonymous_va     | G    | ENSG00000256087 |
| 0 | ZNF441,intron_variant,,E | G    | ENSG00000197044 |
| 0 | ZNF449,intron_variant,,E | T    | ENSG00000173275 |
| 0 | ZNF493,intron_variant,,E | C    | ENSG00000196268 |
| 0 | ZNF512B,intron_variant,, | C    | ENSG00000196700 |
| 1 | ZNF592,missense_variar   | A    | ENSG00000166716 |
| 0 | ZNF598,missense_variar   | T    | ENSG00000167962 |
| 0 | ZNF614,missense_variar   | A    | ENSG00000142556 |
| 0 | ZNF626,5_prime_UTR_v     | AAGT | ENSG00000188171 |
| 2 | ZNF676,missense_variar   | T    | ENSG00000196109 |
| 0 | ZNF697,synonymous_va     | A    | ENSG00000143067 |
| 0 | ZNF708,missense_variar   | C    | ENSG00000182141 |
| 0 | ZNF717,5_prime_UTR_v     | T    | ENSG00000227124 |
| 0 | ZNF75D,synonymous_va     | T    | ENSG00000186376 |
| 0 | ZNF785,missense_variar   | C    | ENSG00000197162 |
| 0 | ZNF816,synonymous_va     | T    | ENSG00000180257 |
| 0 | ZNF839,synonymous_va     | T    | ENSG00000022976 |
| 1 | ZP1,missense_varian,p.   | T    | ENSG00000149506 |
| 0 | ZSCAN2,3_prime_UTR_      | A    | ENSG00000176371 |
| 0 | ZSWIM4,intron_variant,,E | C    | ENSG00000132003 |
| 0 | ZZEF1,intron_variant,,E  | T    | ENSG00000074755 |



VEP annotated somatic variants

| Feature         | Feature_type | Consequence                        | cDNA_position |
|-----------------|--------------|------------------------------------|---------------|
| ENST00000356517 | Transcript   | intron_variant                     | -/1487        |
| ENST00000375234 | Transcript   | intron_variant                     | -/2863        |
| ENST00000393376 | Transcript   | intron_variant                     | -/3233        |
| ENST00000269081 | Transcript   | synonymous_variant                 | 1693/6362     |
| ENST00000301732 | Transcript   | 3_prime_UTR_variant                | 5851/6609     |
| ENST00000284425 | Transcript   | intron_variant                     | -/5300        |
| ENST00000284425 | Transcript   | intron_variant                     | -/5300        |
| ENST00000340001 | Transcript   | intron_variant                     | -/6514        |
| ENST00000399410 | Transcript   | synonymous_variant                 | 4213/6552     |
| ENST00000205557 | Transcript   | intron_variant                     | -/5747        |
| ENST00000389817 | Transcript   | synonymous_variant                 | 3888/4921     |
| ENST00000289119 | Transcript   | 5_prime_UTR_variant                | 89-90/2064    |
| ENST00000302538 | Transcript   | 3_prime_UTR_variant,intron_variant | -/5289        |
| ENST00000436594 | Transcript   | upstream_gene_variant              | -/588         |
| ENST00000600805 | Transcript   | missense_variant                   | 340/756       |
| ENST00000281182 | Transcript   | intron_variant                     | -/2249        |
| ENST00000420607 | Transcript   | intron_variant                     | -/1332        |
| ENST00000358776 | Transcript   | intron_variant                     | -/5859        |
| ENST00000366812 | Transcript   | intron_variant                     | -/3573        |
| ENST00000301452 | Transcript   | 5_prime_UTR_variant                | 37/1445       |
| ENST00000256997 | Transcript   | intron_variant                     | -/2203        |
| ENST00000286353 | Transcript   | 3_prime_UTR_variant,intron_variant | -/3281        |
| ENST00000258873 | Transcript   | intron_variant                     | -/6357        |
| ENST00000317447 | Transcript   | intron_variant                     | -/3664        |
| ENST00000399422 | Transcript   | intron_variant                     | -/2142        |
| ENST00000352511 | Transcript   | 3_prime_UTR_variant,intron_variant | -/11821       |
| ENST00000356955 | Transcript   | missense_variant                   | 2406/2949     |
| ENST00000310823 | Transcript   | intron_variant                     | -/4349        |
| ENST00000373208 | Transcript   | missense_variant                   | 2818/5269     |
| ENST00000251582 | Transcript   | intron_variant                     | -/6754        |
| ENST00000389420 | Transcript   | intron_variant                     | -/6076        |
| ENST00000367996 | Transcript   | intron_variant                     | -/9773        |
| ENST00000381055 | Transcript   | intron_variant                     | -/7311        |
| ENST00000380548 | Transcript   | intron_variant                     | -/8030        |
| ENST00000367236 | Transcript   | intron_variant                     | -/3407        |
| ENST00000369716 | Transcript   | upstream_gene_variant              | -/1517        |
| ENST00000304129 | Transcript   | synonymous_variant                 | 651/3705      |
| ENST00000395146 | Transcript   | intron_variant                     | -/9285        |
| ENST00000370460 | Transcript   | intron_variant                     | -/13746       |
| ENST00000397238 | Transcript   | intron_variant                     | -/3225        |
| ENST00000436302 | Transcript   | intron_variant                     | -/3533        |
| ENST00000542281 | Transcript   | synonymous_variant                 | 1019/2412     |
| ENST00000367800 | Transcript   | intron_variant                     | -/5921        |
| ENST00000302312 | Transcript   | intron_variant                     | -/524         |
| ENST00000357847 | Transcript   | synonymous_variant                 | 98/1395       |
| ENST00000527815 | Transcript   | intron_variant                     | -/2523        |
| ENST00000527815 | Transcript   | intron_variant                     | -/2523        |
| ENST00000381129 | Transcript   | missense_variant                   | 367/2959      |
| ENST00000291582 | Transcript   | synonymous_variant                 | 715/2257      |
| ENST00000291582 | Transcript   | intron_variant                     | -/2257        |
| ENST00000356239 | Transcript   | 3_prime_UTR_variant,intron_variant | -/12471       |
| ENST00000356239 | Transcript   | intron_variant                     | -/12471       |
| ENST00000359579 | Transcript   | intron_variant                     | -/1590        |
| ENST00000295897 | Transcript   | intron_variant                     | -/2263        |

VEP annotated somatic variants

|                 |            |                                 |           |
|-----------------|------------|---------------------------------|-----------|
| ENST00000293350 | Transcript | intron_variant                  | -/3153    |
| ENST00000329841 | Transcript | intron_variant                  | -/3924    |
| ENST00000374391 | Transcript | intron_variant                  | -/2504    |
| ENST00000258888 | Transcript | 5_prime_UTR_variant             | 94/10917  |
| ENST00000258888 | Transcript | intron_variant                  | -/10917   |
| ENST00000356289 | Transcript | intron_variant                  | -/1944    |
| ENST00000356289 | Transcript | intron_variant                  | -/1944    |
| ENST00000341068 | Transcript | synonymous_variant              | 5114/8259 |
| ENST00000265709 | Transcript | intron_variant                  | -/6379    |
| ENST00000520309 | Transcript | intron_variant                  | -/4410    |
| ENST00000303941 | Transcript | intron_variant                  | -/2543    |
| ENST00000357997 | Transcript | intron_variant                  | -/4481    |
| ENST00000290943 | Transcript | missense_variant                | 3121/3773 |
| ENST00000376087 | Transcript | intron_variant                  | -/6591    |
| ENST00000399451 | Transcript | 3_prime_UTR_variant,intron_v    | -/6564    |
| ENST00000355594 | Transcript | synonymous_variant              | 891/3342  |
| ENST00000267116 | Transcript | intron_variant                  | -/8688    |
| ENST00000341048 | Transcript | intron_variant                  | -/2500    |
| ENST00000374700 | Transcript | intron_variant                  | -/5070    |
| ENST00000595053 | Transcript | 5_prime_UTR_variant             | 62/1130   |
| ENST00000357586 | Transcript | intron_variant                  | -/4176    |
| ENST00000359032 | Transcript | intron_variant                  | -/3286    |
| ENST00000261842 | Transcript | intron_variant                  | -/6758    |
| ENST00000261842 | Transcript | missense_variant,splice_region_ | 1172/6758 |
| ENST00000376236 | Transcript | intron_variant                  | -/2771    |
| ENST00000373173 | Transcript | intron_variant                  | -/1279    |
| ENST00000337801 | Transcript | missense_variant                | 152/1084  |
| ENST00000337801 | Transcript | 5_prime_UTR_variant             | 6/1084    |
| ENST00000383168 | Transcript | intron_variant                  | -/5274    |
| ENST00000357872 | Transcript | missense_variant                | 2042/4581 |
| ENST00000256682 | Transcript | intron_variant                  | -/4105    |
| ENST00000336498 | Transcript | missense_variant                | 2289/3299 |
| ENST00000453547 | Transcript | intron_variant                  | -/8956    |
| ENST00000276211 | Transcript | intron_variant                  | -/3083    |
| ENST00000370028 | Transcript | synonymous_variant              | 1864/3372 |
| ENST00000368194 | Transcript | intron_variant                  | -/6889    |
| ENST00000378378 | Transcript | intron_variant                  | -/3061    |
| ENST00000361247 | Transcript | upstream_gene_variant           | -/4149    |
| ENST00000338458 | Transcript | missense_variant                | 1209/3639 |
| ENST00000375741 | Transcript | synonymous_variant              | 793/5525  |
| ENST00000378909 | Transcript | intron_variant                  | -/1411    |
| ENST00000377275 | Transcript | 3_prime_UTR_variant,synonymous  | 725/7196  |
| ENST00000481646 | Transcript | intron_variant                  | -/3043    |
| ENST00000423738 | Transcript | 5_prime_UTR_variant             | 7/7420    |
| ENST00000423738 | Transcript | missense_variant                | 452/7420  |
| ENST00000423738 | Transcript | upstream_gene_variant           | -/7420    |
| ENST00000423738 | Transcript | synonymous_variant              | 6211/7420 |
| ENST00000412477 | Transcript | intron_variant                  | -/1779    |
| ENST00000222250 | Transcript | intron_variant                  | -/2503    |
| ENST00000222250 | Transcript | 3_prime_UTR_variant,intron_v    | -/2503    |
| ENST00000216124 | Transcript | missense_variant                | 978/2050  |
| ENST00000263207 | Transcript | intron_variant                  | -/4041    |
| ENST00000420175 | Transcript | intron_variant                  | -/1694    |
| ENST00000487349 | Transcript | intron_variant                  | -/3179    |
| ENST00000325885 | Transcript | intron_variant                  | -/3825    |

VEP annotated somatic variants

|                 |            |                                      |            |
|-----------------|------------|--------------------------------------|------------|
| ENST00000277458 | Transcript | 5_prime_UTR_variant                  | 98/2330    |
| ENST00000347842 | Transcript | intron_variant                       | -/2684     |
| ENST00000306729 | Transcript | intron_variant                       | -/2123     |
| ENST00000342380 | Transcript | intron_variant                       | -/1296     |
| ENST00000342380 | Transcript | intron_variant                       | -/1296     |
| ENST00000361209 | Transcript | intron_variant                       | -/4622     |
| ENST00000269197 | Transcript | intron_variant                       | -/11344    |
| ENST00000284629 | Transcript | intron_variant                       | -/1865     |
| ENST00000317868 | Transcript | intron_variant                       | -/2938     |
| ENST00000358385 | Transcript | intron_variant                       | -/2647     |
| ENST00000487903 | Transcript | 3_prime_UTR_variant                  | 3843/8858  |
| ENST00000326735 | Transcript | synonymous_variant                   | 1039/3840  |
| ENST00000361216 | Transcript | synonymous_variant                   | 2348/5421  |
| ENST00000368081 | Transcript | intron_variant                       | -/3839     |
| ENST00000262429 | Transcript | intron_variant                       | -/3376     |
| ENST00000356708 | Transcript | intron_variant                       | -/1163     |
| ENST00000341514 | Transcript | intron_variant                       | -/8483     |
| ENST00000536015 | Transcript | intron_variant                       | -/5935     |
| ENST00000338821 | Transcript | intron_variant                       | -/8106     |
| ENST00000338821 | Transcript | intron_variant                       | -/8106     |
| ENST00000320211 | Transcript | intron_variant                       | -/2590     |
| ENST00000395547 | Transcript | intron_variant                       | -/3981     |
| ENST00000374521 | Transcript | intron_variant                       | -/1365     |
| ENST00000276101 | Transcript | 3_prime_UTR_variant,intron_v         | -/2124     |
| ENST00000367618 | Transcript | splice_region_variant,splice_region_ | 1951/3642  |
| ENST00000262320 | Transcript | intron_variant                       | -/3643     |
| ENST00000318683 | Transcript | missense_variant                     | 1130/2226  |
| ENST00000321300 | Transcript | intron_variant                       | -/2879     |
| ENST00000324385 | Transcript | intron_variant                       | -/4678     |
| ENST00000542236 | Transcript | missense_variant                     | 1538/3431  |
| ENST00000269980 | Transcript | 5_prime_UTR_variant                  | 335/2103   |
| ENST00000223368 | Transcript | intron_variant                       | -/1975     |
| ENST00000540052 | Transcript | intron_variant                       | -/7127     |
| ENST00000449131 | Transcript | intron_variant                       | -/4267     |
| ENST00000281474 | Transcript | splice_donor_variant                 | -/3281     |
| ENST00000224337 | Transcript | intron_variant                       | -/1784     |
| ENST00000252677 | Transcript | missense_variant                     | 308/1179   |
| ENST00000345382 | Transcript | intron_variant                       | -/4610     |
| ENST00000170150 | Transcript | intron_variant                       | -/1898     |
| ENST00000306378 | Transcript | intron_variant                       | -/9688     |
| ENST00000471181 | Transcript | intron_variant                       | -/5936     |
| ENST00000471181 | Transcript | intron_variant                       | -/5936     |
| ENST00000471181 | Transcript | intron_variant                       | -/5936     |
| ENST00000544455 | Transcript | intron_variant                       | -/10984    |
| ENST00000467963 | Transcript | intron_variant                       | -/2156     |
| ENST00000333229 | Transcript | synonymous_variant                   | 1192/10141 |
| ENST00000446293 | Transcript | intron_variant                       | -/1505     |
| ENST00000333511 | Transcript | intron_variant                       | -/1974     |
| ENST00000333511 | Transcript | intron_variant                       | -/1974     |
| ENST00000260723 | Transcript | intron_variant                       | -/1849     |
| ENST00000260723 | Transcript | missense_variant                     | 1243/1849  |
| ENST00000342818 | Transcript | intron_variant                       | -/1408     |
| ENST00000256015 | Transcript | intron_variant                       | -/2448     |
| ENST00000327705 | Transcript | synonymous_variant                   | 1224/3500  |
| ENST00000343736 | Transcript | intron_variant                       | -/5947     |

VEP annotated somatic variants

|                 |            |                                    |              |
|-----------------|------------|------------------------------------|--------------|
| ENST00000441508 | Transcript | upstream_gene_variant              | -/4837       |
| ENST00000374144 | Transcript | synonymous_variant                 | 4560/5230    |
| ENST00000284694 | Transcript | intron_variant                     | -/3076       |
| ENST00000378615 | Transcript | intron_variant                     | -/1651       |
| ENST00000261318 | Transcript | missense_variant                   | 325/2801     |
| ENST00000524981 | Transcript | intron_variant                     | -/9766       |
| ENST00000330828 | Transcript | frameshift_variant                 | 753-754/1684 |
| ENST00000399910 | Transcript | intron_variant                     | -/1670       |
| ENST00000381365 | Transcript | downstream_gene_variant            | -/3199       |
| ENST00000319977 | Transcript | 3_prime_UTR_variant                | 2230/2725    |
| ENST00000590083 | Transcript | missense_variant                   | 1405/4261    |
| ENST00000301246 | Transcript | 5_prime_UTR_variant                | 95/467       |
| ENST00000304661 | Transcript | missense_variant                   | 632/1613     |
| ENST00000366534 | Transcript | synonymous_variant                 | 1788/3333    |
| ENST00000371007 | Transcript | intron_variant                     | -/2153       |
| ENST00000343433 | Transcript | intron_variant                     | -/3135       |
| ENST00000326665 | Transcript | 3_prime_UTR_variant,intron_variant | -/7159       |
| ENST00000339142 | Transcript | intron_variant                     | -/3100       |
| ENST00000388934 | Transcript | 3_prime_UTR_variant                | 1513/1911    |
| ENST00000290390 | Transcript | intron_variant                     | -/2227       |
| ENST00000245907 | Transcript | intron_variant                     | -/5263       |
| ENST00000398965 | Transcript | intron_variant                     | -/2177       |
| ENST00000223642 | Transcript | intron_variant                     | -/5462       |
| ENST00000223642 | Transcript | intron_variant                     | -/5462       |
| ENST00000380175 | Transcript | 5_prime_UTR_variant                | 433/1834     |
| ENST00000313164 | Transcript | intron_variant                     | -/4257       |
| ENST00000451037 | Transcript | intron_variant                     | -/3189       |
| ENST00000309893 | Transcript | synonymous_variant                 | 711/1094     |
| ENST00000398319 | Transcript | missense_variant                   | 2831/7480    |
| ENST00000360228 | Transcript | intron_variant                     | -/8392       |
| ENST00000371372 | Transcript | 3_prime_UTR_variant,intron_variant | -/9790       |
| ENST00000347598 | Transcript | intron_variant                     | -/6655       |
| ENST00000479441 | Transcript | intron_variant                     | -/3453       |
| ENST00000479441 | Transcript | intron_variant                     | -/3453       |
| ENST00000324631 | Transcript | intron_variant                     | -/3446       |
| ENST00000502583 | Transcript | intron_variant                     | -/3284       |
| ENST00000361675 | Transcript | intron_variant                     | -/3612       |
| ENST00000316448 | Transcript | 5_prime_UTR_variant                | 3/1903       |
| ENST00000378847 | Transcript | 3_prime_UTR_variant                | 1536/8154    |
| ENST00000342666 | Transcript | intron_variant                     | -/1940       |
| ENST00000378494 | Transcript | intron_variant                     | -/1495       |
| ENST00000446248 | Transcript | synonymous_variant                 | 950/4179     |
| ENST00000398776 | Transcript | intron_variant                     | -/2728       |
| ENST00000271971 | Transcript | intron_variant                     | -/2362       |
| ENST00000222125 | Transcript | intron_variant                     | -/1221       |
| ENST00000403299 | Transcript | intron_variant                     | -/4113       |
| ENST00000391898 | Transcript | intron_variant                     | -/5263       |
| ENST00000427043 | Transcript | 3_prime_UTR_variant                | 1134/3241    |
| ENST00000368078 | Transcript | intron_variant                     | -/1897       |
| ENST00000377022 | Transcript | intron_variant                     | -/7936       |
| ENST00000409235 | Transcript | intron_variant                     | -/3746       |
| ENST00000343849 | Transcript | synonymous_variant                 | 104/1431     |
| ENST00000258214 | Transcript | synonymous_variant                 | 1540/2463    |
| ENST00000349456 | Transcript | intron_variant                     | -/2048       |
| ENST00000292574 | Transcript | missense_variant                   | 815/1732     |

VEP annotated somatic variants

|                 |            |                       |              |
|-----------------|------------|-----------------------|--------------|
| ENST00000398545 | Transcript | intron_variant        | -/1851       |
| ENST00000422185 | Transcript | 3_prime_UTR_variant   | 2345/3593    |
| ENST00000305866 | Transcript | 3_prime_UTR_variant   | 3046/3613    |
| ENST00000329214 | Transcript | intron_variant        | -/2468       |
| ENST00000369704 | Transcript | synonymous_variant    | 704/3313     |
| ENST00000388914 | Transcript | missense_variant      | 2177/3663    |
| ENST00000511166 | Transcript | intron_variant        | -/2051       |
| ENST00000370276 | Transcript | intron_variant        | -/4779       |
| ENST00000392343 | Transcript | synonymous_variant    | 511/2896     |
| ENST00000263102 | Transcript | intron_variant        | -/5811       |
| ENST00000445632 | Transcript | intron_variant        | -/2528       |
| ENST00000311925 | Transcript | intron_variant        | -/687        |
| ENST00000292301 | Transcript | intron_variant        | -/2671       |
| ENST00000287097 | Transcript | missense_variant      | 2502/9130    |
| ENST00000398214 | Transcript | frameshift_variant    | 834/1296     |
| ENST00000368033 | Transcript | intron_variant        | -/1360       |
| ENST00000360141 | Transcript | intron_variant        | -/1856       |
| ENST00000309424 | Transcript | missense_variant      | 1264/3286    |
| ENST00000322875 | Transcript | intron_variant        | -/3278       |
| ENST00000312648 | Transcript | inframe_deletion      | 622-648/1281 |
| ENST00000394886 | Transcript | upstream_gene_variant | -/3153       |
| ENST00000342711 | Transcript | intron_variant        | -/5742       |
| ENST00000437685 | Transcript | intron_variant        | -/2007       |
| ENST00000296129 | Transcript | missense_variant      | 1709/6006    |
| ENST00000507958 | Transcript | intron_variant        | -/3542       |
| ENST00000368911 | Transcript | intron_variant        | -/6246       |
| ENST00000425876 | Transcript | intron_variant        | -/1582       |
| ENST00000256443 | Transcript | intron_variant        | -/1432       |
| ENST00000274695 | Transcript | synonymous_variant    | 1394/3272    |
| ENST00000379989 | Transcript | intron_variant        | -/3459       |
| ENST00000460006 | Transcript | intron_variant        | -/9298       |
| ENST00000376288 | Transcript | intron_variant        | -/2552       |
| ENST00000376288 | Transcript | 5_prime_UTR_variant   | 22/2552      |
| ENST00000401445 | Transcript | intron_variant        | -/1008       |
| ENST00000357396 | Transcript | intron_variant        | -/1316       |
| ENST00000399839 | Transcript | intron_variant        | -/3986       |
| ENST00000262608 | Transcript | intron_variant        | -/5637       |
| ENST00000262608 | Transcript | missense_variant      | 755/5637     |
| ENST00000336737 | Transcript | intron_variant        | -/1799       |
| ENST00000331437 | Transcript | synonymous_variant    | 678/4954     |
| ENST00000372927 | Transcript | intron_variant        | -/3262       |
| ENST00000368328 | Transcript | missense_variant      | 183/750      |
| ENST00000397527 | Transcript | intron_variant        | -/8398       |
| ENST00000397527 | Transcript | intron_variant        | -/8398       |
| ENST00000337090 | Transcript | intron_variant        | -/5778       |
| ENST00000337090 | Transcript | intron_variant        | -/5778       |
| ENST00000264982 | Transcript | missense_variant      | 671/2732     |
| ENST00000556440 | Transcript | intron_variant        | -/3139       |
| ENST00000372838 | Transcript | intron_variant        | -/2685       |
| ENST00000317091 | Transcript | intron_variant        | -/3927       |
| ENST00000367429 | Transcript | missense_variant      | 1444/4127    |
| ENST00000003084 | Transcript | synonymous_variant    | 4521/6128    |
| ENST00000597853 | Transcript | 5_prime_UTR_variant   | 2838/3386    |
| ENST00000369258 | Transcript | synonymous_variant    | 59/2967      |
| ENST00000432561 | Transcript | intron_variant        | -/2648       |

VEP annotated somatic variants

|                 |            |                              |           |
|-----------------|------------|------------------------------|-----------|
| ENST00000432561 | Transcript | intron_variant               | -/2648    |
| ENST00000445067 | Transcript | missense_variant             | 1316/2169 |
| ENST00000306071 | Transcript | 3_prime_UTR_variant          | 1641/2557 |
| ENST00000306243 | Transcript | 3_prime_UTR_variant          | 1390/2194 |
| ENST00000324288 | Transcript | intron_variant               | -/9438    |
| ENST00000536961 | Transcript | synonymous_variant           | 722/845   |
| ENST00000392521 | Transcript | intron_variant               | -/8708    |
| ENST00000453707 | Transcript | missense_variant             | 619/998   |
| ENST00000424301 | Transcript | intron_variant               | -/1637    |
| ENST00000346436 | Transcript | intron_variant               | -/5583    |
| ENST00000331433 | Transcript | intron_variant               | -/2475    |
| ENST00000401528 | Transcript | 3_prime_UTR_variant          | 1906/2131 |
| ENST00000299663 | Transcript | 5_prime_UTR_variant          | 142/2159  |
| ENST00000369449 | Transcript | 3_prime_UTR_variant          | 982/2655  |
| ENST00000374379 | Transcript | splice_acceptor_variant      | -/4346    |
| ENST00000540338 | Transcript | intron_variant               | -/4400    |
| ENST00000320081 | Transcript | intron_variant               | -/4293    |
| ENST00000379510 | Transcript | intron_variant               | -/5315    |
| ENST00000356713 | Transcript | intron_variant               | -/5959    |
| ENST00000317147 | Transcript | synonymous_variant           | 5049/8471 |
| ENST00000289382 | Transcript | intron_variant               | -/2599    |
| ENST00000537554 | Transcript | synonymous_variant           | 4922/8974 |
| ENST00000397461 | Transcript | intron_variant               | -/5198    |
| ENST00000361727 | Transcript | intron_variant               | -/9894    |
| ENST00000361727 | Transcript | 3_prime_UTR_variant,intron_v | -/9894    |
| ENST00000373855 | Transcript | intron_variant               | -/7660    |
| ENST00000265136 | Transcript | synonymous_variant           | 3691/5291 |
| ENST00000323786 | Transcript | intron_variant               | -/2833    |
| ENST00000297135 | Transcript | intron_variant               | -/4060    |
| ENST00000353479 | Transcript | intron_variant               | -/5734    |
| ENST00000390654 | Transcript | intron_variant               | -/3061    |
| ENST00000370571 | Transcript | intron_variant               | -/6825    |
| ENST00000370571 | Transcript | intron_variant               | -/6825    |
| ENST00000313669 | Transcript | missense_variant             | 1432/3007 |
| ENST00000372216 | Transcript | intron_variant               | -/6570    |
| ENST00000264828 | Transcript | intron_variant               | -/6174    |
| ENST00000361866 | Transcript | intron_variant               | -/4238    |
| ENST00000295550 | Transcript | intron_variant               | -/10749   |
| ENST00000361682 | Transcript | synonymous_variant           | 790/2437  |
| ENST00000411948 | Transcript | intron_variant               | -/2631    |
| ENST00000264613 | Transcript | intron_variant               | -/4676    |
| ENST00000568128 | Transcript | intron_variant               | -/2112    |
| ENST00000265085 | Transcript | 3_prime_UTR_variant          | 3698/9483 |
| ENST00000367057 | Transcript | missense_variant             | 3343/4240 |
| ENST00000373631 | Transcript | intron_variant               | -/5550    |
| ENST00000348438 | Transcript | intron_variant               | -/1600    |
| ENST00000280527 | Transcript | intron_variant               | -/5912    |
| ENST00000280527 | Transcript | intron_variant               | -/5912    |
| ENST00000433368 | Transcript | synonymous_variant           | 847/2205  |
| ENST00000377340 | Transcript | intron_variant               | -/4406    |
| ENST00000268184 | Transcript | intron_variant               | -/2537    |
| ENST00000182096 | Transcript | intron_variant               | -/4782    |
| ENST00000419587 | Transcript | 5_prime_UTR_variant          | 135/4261  |
| ENST00000370287 | Transcript | 5_prime_UTR_variant          | 314/875   |
| ENST00000217244 | Transcript | intron_variant               | -/4416    |

VEP annotated somatic variants

|                 |            |                         |                |
|-----------------|------------|-------------------------|----------------|
| ENST00000308508 | Transcript | synonymous_variant      | 4005/8290      |
| ENST00000423479 | Transcript | intron_variant          | -/2465         |
| ENST00000598234 | Transcript | synonymous_variant      | 4641/7627      |
| ENST00000433211 | Transcript | intron_variant          | -/10675        |
| ENST00000325551 | Transcript | synonymous_variant      | 510/2490       |
| ENST00000377833 | Transcript | synonymous_variant      | 1977/11949     |
| ENST00000537177 | Transcript | intron_variant          | -/2376         |
| ENST00000535468 | Transcript | missense_variant        | 4802/5504      |
| ENST00000360264 | Transcript | intron_variant          | -/13762        |
| ENST00000360264 | Transcript | missense_variant        | 2952/13762     |
| ENST00000410053 | Transcript | intron_variant          | -/3280         |
| ENST00000410053 | Transcript | synonymous_variant      | 2703/3280      |
| ENST00000282251 | Transcript | missense_variant        | 1355/3278      |
| ENST00000373691 | Transcript | 5_prime_UTR_variant     | 110/1861       |
| ENST00000426130 | Transcript | intron_variant          | -/3205         |
| ENST00000533558 | Transcript | intron_variant          | -/1658         |
| ENST00000330436 | Transcript | intron_variant          | -/1739         |
| ENST00000330436 | Transcript | intron_variant          | -/1739         |
| ENST00000336411 | Transcript | intron_variant          | -/2153         |
| ENST00000550308 | Transcript | missense_variant        | 418/2044       |
| ENST00000003100 | Transcript | intron_variant          | -/3210         |
| ENST00000257215 | Transcript | synonymous_variant      | 179/5757       |
| ENST00000264161 | Transcript | intron_variant          | -/2361         |
| ENST00000260803 | Transcript | intron_variant          | -/2666         |
| ENST00000254337 | Transcript | intron_variant          | -/2271         |
| ENST00000254337 | Transcript | synonymous_variant      | 255/2271       |
| ENST00000254337 | Transcript | intron_variant          | -/2271         |
| ENST00000442544 | Transcript | intron_variant          | -/5721         |
| ENST00000378454 | Transcript | synonymous_variant      | 1319/4707      |
| ENST00000339452 | Transcript | 5_prime_UTR_variant     | 282/5055       |
| ENST00000357067 | Transcript | synonymous_variant      | 414/1931       |
| ENST00000407793 | Transcript | intron_variant          | -/3922         |
| ENST00000407793 | Transcript | intron_variant          | -/3922         |
| ENST00000331314 | Transcript | intron_variant          | -/2289         |
| ENST00000373624 | Transcript | intron_variant          | -/5010         |
| ENST00000328194 | Transcript | missense_variant        | 991/5031       |
| ENST00000265036 | Transcript | intron_variant          | -/2499         |
| ENST00000263196 | Transcript | intron_variant          | -/4480         |
| ENST00000403951 | Transcript | intron_variant          | -/6917         |
| ENST00000376223 | Transcript | intron_variant          | -/1723         |
| ENST00000284690 | Transcript | intron_variant          | -/3070         |
| ENST00000308736 | Transcript | intron_variant          | -/4548         |
| ENST00000262415 | Transcript | downstream_gene_variant | -/5558         |
| ENST00000262415 | Transcript | intron_variant          | -/5558         |
| ENST00000262415 | Transcript | intron_variant          | -/5558         |
| ENST00000398557 | Transcript | intron_variant          | -/5789         |
| ENST00000301180 | Transcript | intron_variant          | -/8593         |
| ENST00000319212 | Transcript | 3_prime_UTR_variant     | 3290-3293/3647 |
| ENST00000366636 | Transcript | 3_prime_UTR_variant     | 2158/2224      |
| ENST00000366633 | Transcript | intron_variant          | -/2676         |
| ENST00000220812 | Transcript | intron_variant          | -/894          |
| ENST00000376104 | Transcript | intron_variant          | -/5139         |
| ENST00000374360 | Transcript | intron_variant          | -/5905         |
| ENST00000372391 | Transcript | intron_variant          | -/7415         |
| ENST00000357338 | Transcript | intron_variant          | -/2038         |

VEP annotated somatic variants

|                 |            |                                    |           |
|-----------------|------------|------------------------------------|-----------|
| ENST00000339686 | Transcript | intron_variant                     | -/1927    |
| ENST00000399180 | Transcript | intron_variant                     | -/4416    |
| ENST00000328843 | Transcript | intron_variant                     | -/14188   |
| ENST00000351747 | Transcript | intron_variant                     | -/9542    |
| ENST00000430092 | Transcript | intron_variant                     | -/13788   |
| ENST00000430092 | Transcript | intron_variant                     | -/13788   |
| ENST00000430092 | Transcript | intron_variant                     | -/13788   |
| ENST00000430092 | Transcript | intron_variant                     | -/13788   |
| ENST00000430092 | Transcript | intron_variant                     | -/13788   |
| ENST00000389840 | Transcript | intron_variant                     | -/13792   |
| ENST00000359357 | Transcript | intron_variant                     | -/13860   |
| ENST00000262442 | Transcript | intron_variant                     | -/13750   |
| ENST00000296218 | Transcript | 3_prime_UTR_variant,intron_v       | -/2649    |
| ENST00000370665 | Transcript | intron_variant                     | -/1269    |
| ENST00000324109 | Transcript | intron_variant                     | -/6400    |
| ENST00000256935 | Transcript | intron_variant                     | -/6097    |
| ENST00000266037 | Transcript | intron_variant                     | -/8755    |
| ENST00000398665 | Transcript | synonymous_variant                 | 3474/7436 |
| ENST00000393092 | Transcript | missense_variant                   | 1342/1734 |
| ENST00000355526 | Transcript | intron_variant                     | -/1632    |
| ENST00000370109 | Transcript | intron_variant                     | -/1316    |
| ENST00000324472 | Transcript | 3_prime_UTR_variant,intron_v       | -/4060    |
| ENST00000294485 | Transcript | 3_prime_UTR_variant,intron_v       | -/7346    |
| ENST00000395209 | Transcript | intron_variant                     | -/7277    |
| ENST00000395209 | Transcript | intron_variant                     | -/7277    |
| ENST00000395209 | Transcript | intron_variant                     | -/7277    |
| ENST00000321322 | Transcript | intron_variant                     | -/6899    |
| ENST00000257189 | Transcript | intron_variant                     | -/5525    |
| ENST00000359747 | Transcript | synonymous_variant                 | 3152/4526 |
| ENST00000359747 | Transcript | synonymous_variant                 | 59/4526   |
| ENST00000379802 | Transcript | intron_variant                     | -/9796    |
| ENST00000244364 | Transcript | intron_variant                     | -/16742   |
| ENST00000310850 | Transcript | intron_variant                     | -/2717    |
| ENST00000344537 | Transcript | intron_variant                     | -/1403    |
| ENST00000510708 | Transcript | intron_variant                     | -/2307    |
| ENST00000324432 | Transcript | synonymous_variant                 | 789/2769  |
| ENST00000334679 | Transcript | 5_prime_UTR_variant                | 468/2479  |
| ENST00000279488 | Transcript | missense_variant                   | 1662/4400 |
| ENST00000324972 | Transcript | intron_variant                     | -/2950    |
| ENST00000398093 | Transcript | intron_variant                     | -/12945   |
| ENST00000431635 | Transcript | 5_prime_UTR_variant                | 57/1503   |
| ENST00000495186 | Transcript | missense_variant                   | 900/1775  |
| ENST00000374893 | Transcript | 5_prime_UTR_variant,splice_region_ | 1097/2484 |
| ENST00000304546 | Transcript | intron_variant                     | -/2865    |
| ENST00000392692 | Transcript | intron_variant                     | -/4158    |
| ENST00000423192 | Transcript | intron_variant                     | -/4319    |
| ENST00000318130 | Transcript | intron_variant                     | -/6898    |
| ENST00000379375 | Transcript | intron_variant                     | -/2033    |
| ENST00000377211 | Transcript | intron_variant                     | -/4471    |
| ENST00000322349 | Transcript | intron_variant                     | -/9875    |
| ENST00000217182 | Transcript | intron_variant                     | -/1843    |
| ENST00000379715 | Transcript | intron_variant                     | -/1077    |
| ENST00000331493 | Transcript | intron_variant                     | -/3931    |
| ENST00000450662 | Transcript | intron_variant                     | -/1691    |
| ENST00000440314 | Transcript | intron_variant                     | -/2697    |



VEP annotated somatic variants

|                 |            |                              |           |
|-----------------|------------|------------------------------|-----------|
| ENST00000295824 | Transcript | synonymous_variant           | 534/2823  |
| ENST00000268206 | Transcript | intron_variant               | -/3675    |
| ENST00000426333 | Transcript | intron_variant               | -/4548    |
| ENST00000253039 | Transcript | synonymous_variant           | 352/2858  |
| ENST00000308167 | Transcript | synonymous_variant           | 1889/4165 |
| ENST00000402918 | Transcript | synonymous_variant           | 1203/8361 |
| ENST00000402918 | Transcript | synonymous_variant           | 2295/8361 |
| ENST00000402918 | Transcript | synonymous_variant           | 2004/8361 |
| ENST00000252034 | Transcript | intron_variant               | -/3781    |
| ENST00000354666 | Transcript | 3_prime_UTR_variant,intron_v | -/3997    |
| ENST00000477853 | Transcript | missense_variant             | 1077/6664 |
| ENST00000220853 | Transcript | intron_variant               | -/1243    |
| ENST00000220853 | Transcript | intron_variant               | -/1243    |
| ENST00000334192 | Transcript | missense_variant             | 1857/4064 |
| ENST00000334192 | Transcript | intron_variant               | -/4064    |
| ENST00000334192 | Transcript | intron_variant               | -/4064    |
| ENST00000295206 | Transcript | synonymous_variant           | 1000/2457 |
| ENST00000373203 | Transcript | intron_variant               | -/3048    |
| ENST00000261488 | Transcript | intron_variant               | -/2982    |
| ENST00000371207 | Transcript | intron_variant               | -/12515   |
| ENST00000334696 | Transcript | downstream_gene_variant      | -/5842    |
| ENST00000389561 | Transcript | intron_variant               | -/12268   |
| ENST00000392957 | Transcript | intron_variant               | -/4043    |
| ENST00000366837 | Transcript | missense_variant             | 612/1776  |
| ENST00000521400 | Transcript | synonymous_variant           | 1666/3140 |
| ENST00000433197 | Transcript | intron_variant               | -/7876    |
| ENST00000257934 | Transcript | intron_variant               | -/6623    |
| ENST00000389567 | Transcript | missense_variant             | 1954/4407 |
| ENST00000557943 | Transcript | missense_variant             | 593/2287  |
| ENST00000354232 | Transcript | missense_variant             | 3202/3551 |
| ENST00000292147 | Transcript | synonymous_variant           | 73/963    |
| ENST00000370331 | Transcript | intron_variant               | -/7403    |
| ENST00000538904 | Transcript | intron_variant               | -/2418    |
| ENST00000538904 | Transcript | intron_variant               | -/2418    |
| ENST00000301607 | Transcript | intron_variant               | -/6614    |
| ENST00000301607 | Transcript | synonymous_variant           | 3404/6614 |
| ENST00000409018 | Transcript | intron_variant               | -/3252    |
| ENST00000366548 | Transcript | missense_variant             | 2358/3473 |
| ENST00000381295 | Transcript | intron_variant               | -/3551    |
| ENST00000367075 | Transcript | intron_variant               | -/3096    |
| ENST00000360256 | Transcript | missense_variant             | 3981/9059 |
| ENST00000360256 | Transcript | intron_variant               | -/9059    |
| ENST00000218099 | Transcript | missense_variant             | 1127/2780 |
| ENST00000374900 | Transcript | intron_variant               | -/1983    |
| ENST00000278840 | Transcript | intron_variant               | -/3630    |
| ENST00000278829 | Transcript | intron_variant               | -/1779    |
| ENST00000407106 | Transcript | intron_variant               | -/2152    |
| ENST00000216214 | Transcript | missense_variant             | 1550/3458 |
| ENST00000370784 | Transcript | intron_variant               | -/1368    |
| ENST00000370784 | Transcript | intron_variant               | -/1368    |
| ENST00000391440 | Transcript | 3_prime_UTR_variant          | 439/2017  |
| ENST00000391440 | Transcript | 3_prime_UTR_variant          | 656/2017  |
| ENST00000395297 | Transcript | intron_variant               | -/6962    |
| ENST00000368557 | Transcript | synonymous_variant           | 495/1033  |
| ENST00000356467 | Transcript | intron_variant               | -/1767    |

VEP annotated somatic variants

|                 |            |                                             |              |
|-----------------|------------|---------------------------------------------|--------------|
| ENST00000329203 | Transcript | 3_prime_UTR_variant                         | 1490/1854    |
| ENST00000265018 | Transcript | intron_variant                              | -/6622       |
| ENST00000327337 | Transcript | intron_variant                              | -/7127       |
| ENST00000324675 | Transcript | upstream_gene_variant                       | -/1184       |
| ENST00000361361 | Transcript | intron_variant                              | -/3082       |
| ENST00000374362 | Transcript | 5_prime_UTR_variant                         | 58/4623      |
| ENST00000361738 | Transcript | intron_variant                              | -/1961       |
| ENST00000259698 | Transcript | synonymous_variant                          | 3176/5471    |
| ENST00000283357 | Transcript | missense_variant                            | 606/1560     |
| ENST00000389301 | Transcript | intron_variant                              | -/5451       |
| ENST00000229769 | Transcript | intron_variant                              | -/2554       |
| ENST00000229769 | Transcript | intron_variant                              | -/2554       |
| ENST00000229769 | Transcript | synonymous_variant                          | 572/2554     |
| ENST00000536681 | Transcript | 3_prime_UTR_variant                         | 1812/3616    |
| ENST00000264042 | Transcript | intron_variant                              | -/4051       |
| ENST00000264042 | Transcript | intron_variant                              | -/4051       |
| ENST00000306749 | Transcript | synonymous_variant                          | 3870/8560    |
| ENST00000306749 | Transcript | intron_variant                              | -/8560       |
| ENST00000306749 | Transcript | intron_variant                              | -/8560       |
| ENST00000306749 | Transcript | upstream_gene_variant                       | -/8560       |
| ENST00000404922 | Transcript | missense_variant                            | 583/4318     |
| ENST00000600128 | Transcript | missense_variant                            | 6311/9362    |
| ENST00000434748 | Transcript | intron_variant                              | -/5568       |
| ENST00000478939 | Transcript | 5_prime_UTR_variant,non_coding_exon_variant | 926/1479     |
| ENST00000432825 | Transcript | intron_variant                              | -/4575       |
| ENST00000432825 | Transcript | intron_variant                              | -/4575       |
| ENST00000292852 | Transcript | intron_variant                              | -/2383       |
| ENST00000296438 | Transcript | intron_variant                              | -/1647       |
| ENST00000331272 | Transcript | intron_variant                              | -/2483       |
| ENST00000324852 | Transcript | intron_variant                              | -/2605       |
| ENST00000594202 | Transcript | synonymous_variant                          | 1431/3214    |
| ENST00000292408 | Transcript | missense_variant                            | 1407/3122    |
| ENST00000336098 | Transcript | 3_prime_UTR_variant                         | 1417/1659    |
| ENST00000257209 | Transcript | intron_variant                              | -/4967       |
| ENST00000257209 | Transcript | synonymous_variant                          | 3074/4967    |
| ENST00000257209 | Transcript | intron_variant                              | -/4967       |
| ENST00000333129 | Transcript | intron_variant                              | -/9536       |
| ENST00000337488 | Transcript | intron_variant                              | -/2198       |
| ENST00000252037 | Transcript | synonymous_variant                          | 663/1500     |
| ENST00000424785 | Transcript | intron_variant                              | -/2834       |
| ENST00000369850 | Transcript | missense_variant                            | 1523/8382    |
| ENST00000490882 | Transcript | intron_variant                              | -/8079       |
| ENST00000261937 | Transcript | intron_variant                              | -/5857       |
| ENST00000319653 | Transcript | intron_variant                              | -/6434       |
| ENST00000319653 | Transcript | intron_variant                              | -/6434       |
| ENST00000367755 | Transcript | synonymous_variant                          | 552/2087     |
| ENST00000263773 | Transcript | inframe_deletion                            | 185-190/3969 |
| ENST00000263773 | Transcript | intron_variant                              | -/3969       |
| ENST00000297267 | Transcript | intron_variant                              | -/6552       |
| ENST00000297267 | Transcript | synonymous_variant                          | 2291/6552    |
| ENST00000259806 | Transcript | synonymous_variant                          | 1398/2187    |
| ENST00000373060 | Transcript | intron_variant                              | -/5948       |
| ENST00000373247 | Transcript | 3_prime_UTR_variant                         | 2006/2274    |
| ENST00000264895 | Transcript | synonymous_variant                          | 2387/12479   |
| ENST00000264895 | Transcript | intron_variant                              | -/12479      |

VEP annotated somatic variants

|                 |            |                              |                |
|-----------------|------------|------------------------------|----------------|
| ENST00000264895 | Transcript | synonymous_variant           | 8879/12479     |
| ENST00000264895 | Transcript | intron_variant               | -/12479        |
| ENST00000264895 | Transcript | intron_variant               | -/12479        |
| ENST00000329798 | Transcript | synonymous_variant           | 3987/6729      |
| ENST00000357447 | Transcript | intron_variant               | -/6815         |
| ENST00000350221 | Transcript | intron_variant               | -/2805         |
| ENST00000306100 | Transcript | intron_variant               | -/4831         |
| ENST00000319725 | Transcript | synonymous_variant           | 1662/3124      |
| ENST00000310160 | Transcript | intron_variant               | -/4246         |
| ENST00000318336 | Transcript | gion_variant,5_prime_UTI     | 1185/3137      |
| ENST00000292079 | Transcript | intron_variant               | -/571          |
| ENST00000296137 | Transcript | intron_variant               | -/8504         |
| ENST00000282538 | Transcript | intron_variant               | -/3759         |
| ENST00000314167 | Transcript | intron_variant               | -/4442         |
| ENST00000314167 | Transcript | intron_variant               | -/4442         |
| ENST00000261304 | Transcript | intron_variant               | -/3883         |
| ENST00000261304 | Transcript | upstream_gene_variant        | -/3883         |
| ENST00000588479 | Transcript | intron_variant               | -/1866         |
| ENST00000297107 | Transcript | intron_variant               | -/5961         |
| ENST00000324589 | Transcript | missense_variant             | 1481/2169      |
| ENST00000252318 | Transcript | missense_variant             | 494/2380       |
| ENST00000252318 | Transcript | missense_variant             | 1880/2380      |
| ENST00000269209 | Transcript | synonymous_variant           | 1060/3006      |
| ENST00000269209 | Transcript | missense_variant             | 1473/3006      |
| ENST00000269209 | Transcript | 3_prime_UTR_variant          | 2729-2730/3006 |
| ENST00000373387 | Transcript | 5_prime_UTR_variant          | 205/3800       |
| ENST00000343435 | Transcript | intron_variant               | -/4047         |
| ENST00000343435 | Transcript | intron_variant               | -/4047         |
| ENST00000343435 | Transcript | synonymous_variant           | 1197/4047      |
| ENST00000400723 | Transcript | synonymous_variant           | 1388/2051      |
| ENST00000379597 | Transcript | intron_variant               | -/4525         |
| ENST00000238018 | Transcript | 3_prime_UTR_variant,intron_v | -/1599         |
| ENST00000342560 | Transcript | intron_variant               | -/2265         |
| ENST00000249598 | Transcript | intron_variant               | -/1936         |
| ENST00000308317 | Transcript | intron_variant               | -/1420         |
| ENST00000486715 | Transcript | intron_variant               | -/3721         |
| ENST00000233838 | Transcript | intron_variant               | -/7569         |
| ENST00000334928 | Transcript | missense_variant             | 1571/2239      |
| ENST00000334928 | Transcript | missense_variant             | 1683/2239      |
| ENST00000301671 | Transcript | missense_variant             | 1847/2650      |
| ENST00000367419 | Transcript | intron_variant               | -/2024         |
| ENST00000262460 | Transcript | missense_variant             | 383/3249       |
| ENST00000205061 | Transcript | synonymous_variant           | 2672/3730      |
| ENST00000205061 | Transcript | intron_variant               | -/3730         |
| ENST00000262366 | Transcript | intron_variant               | -/4469         |
| ENST00000373365 | Transcript | 5_prime_UTR_variant          | 81/2012        |
| ENST00000372617 | Transcript | missense_variant             | 674/1795       |
| ENST00000372617 | Transcript | intron_variant               | -/1795         |
| ENST00000360814 | Transcript | intron_variant               | -/1880         |
| ENST00000287275 | Transcript | intron_variant               | -/1636         |
| ENST00000282570 | Transcript | intron_variant               | -/4191         |
| ENST00000248996 | Transcript | synonymous_variant           | 975/3340       |
| ENST00000329517 | Transcript | missense_variant             | 347/6706       |
| ENST00000226413 | Transcript | synonymous_variant           | 478/2164       |
| ENST00000204726 | Transcript | synonymous_variant           | 3601/9252      |

### VEP annotated somatic variants

|                 |            |                          |           |
|-----------------|------------|--------------------------|-----------|
| ENST00000329125 | Transcript | gion_variant,5_prime_UTI | 71/2501   |
| ENST00000377047 | Transcript | synonymous_variant       | 1863/6467 |
| ENST00000230036 | Transcript | intron_variant           | -/3489    |
| ENST00000316715 | Transcript | intron_variant           | -/3275    |
| ENST00000264718 | Transcript | synonymous_variant       | 42/2496   |
| ENST00000298110 | Transcript | missense_variant         | 370/1527  |
| ENST00000607359 | Transcript | missense_variant         | 652/6004  |
| ENST00000392607 | Transcript | 5_prime_UTR_variant      | 276/4283  |
| ENST00000392607 | Transcript | intron_variant           | -/4283    |
| ENST00000392607 | Transcript | intron_variant           | -/4283    |
| ENST00000561100 | Transcript | intron_variant           | -/2816    |
| ENST00000529750 | Transcript | synonymous_variant       | 1752/7723 |
| ENST00000358160 | Transcript | intron_variant           | -/4177    |
| ENST00000406902 | Transcript | intron_variant           | -/4484    |
| ENST00000406902 | Transcript | intron_variant           | -/4484    |
| ENST00000406902 | Transcript | intron_variant           | -/4484    |
| ENST00000381486 | Transcript | intron_variant           | -/8484    |
| ENST00000518783 | Transcript | upstream_gene_variant    | -/5233    |
| ENST00000296526 | Transcript | intron_variant           | -/5621    |
| ENST00000264357 | Transcript | intron_variant           | -/5172    |
| ENST00000357716 | Transcript | synonymous_variant       | 2063/4127 |
| ENST00000253458 | Transcript | intron_variant           | -/7495    |
| ENST00000373818 | Transcript | missense_variant         | 1916/2657 |
| ENST00000340438 | Transcript | 5_prime_UTR_variant      | 179/2844  |
| ENST00000398606 | Transcript | intron_variant           | -/965     |
| ENST00000216465 | Transcript | intron_variant           | -/1338    |
| ENST00000360803 | Transcript | intron_variant           | -/4696    |
| ENST00000360803 | Transcript | 3_prime_UTR_variant      | 4226/4696 |
| ENST00000218006 | Transcript | intron_variant           | -/3714    |
| ENST00000389617 | Transcript | 3_prime_UTR_variant      | 1533/3260 |
| ENST00000261208 | Transcript | intron_variant           | -/3913    |
| ENST00000598398 | Transcript | intron_variant           | -/652     |
| ENST00000080059 | Transcript | intron_variant           | -/4095    |
| ENST00000080059 | Transcript | intron_variant           | -/4095    |
| ENST00000441542 | Transcript | intron_variant           | -/3210    |
| ENST00000398153 | Transcript | intron_variant           | -/918     |
| ENST00000424830 | Transcript | synonymous_variant       | 570/1334  |
| ENST00000366582 | Transcript | intron_variant           | -/8447    |
| ENST00000366582 | Transcript | intron_variant           | -/8447    |
| ENST00000366582 | Transcript | synonymous_variant       | 1957/8447 |
| ENST00000297440 | Transcript | missense_variant         | 1915/3410 |
| ENST00000399332 | Transcript | intron_variant           | -/9134    |
| ENST00000399332 | Transcript | intron_variant           | -/9134    |
| ENST00000348459 | Transcript | intron_variant           | -/3099    |
| ENST00000348459 | Transcript | intron_variant           | -/3099    |
| ENST00000232854 | Transcript | intron_variant           | -/6087    |
| ENST00000443617 | Transcript | intron_variant           | -/15137   |
| ENST00000357618 | Transcript | missense_variant         | 309/5286  |
| ENST00000222390 | Transcript | synonymous_variant       | 1235/5989 |
| ENST00000441594 | Transcript | intron_variant           | -/1865    |
| ENST00000330710 | Transcript | intron_variant           | -/7390    |
| ENST00000253410 | Transcript | synonymous_variant       | 290/635   |
| ENST00000304043 | Transcript | intron_variant           | -/1081    |
| ENST00000359985 | Transcript | 3_prime_UTR_variant      | 509/1195  |
| ENST00000377831 | Transcript | intron_variant           | -/865     |

VEP annotated somatic variants

|                 |            |                              |            |
|-----------------|------------|------------------------------|------------|
| ENST00000377364 | Transcript | synonymous_variant           | 48/357     |
| ENST00000354624 | Transcript | intron_variant               | -/3689     |
| ENST00000418931 | Transcript | missense_variant             | 735/1560   |
| ENST00000399120 | Transcript | intron_variant               | -/6466     |
| ENST00000310053 | Transcript | intron_variant               | -/5317     |
| ENST00000278715 | Transcript | synonymous_variant           | 757/1501   |
| ENST00000216106 | Transcript | intron_variant               | -/4047     |
| ENST00000216106 | Transcript | missense_variant             | 622/4047   |
| ENST00000257555 | Transcript | intron_variant               | -/3442     |
| ENST00000392006 | Transcript | intron_variant               | -/3555     |
| ENST00000397668 | Transcript | synonymous_variant           | 1460/2513  |
| ENST00000262626 | Transcript | intron_variant               | -/2363     |
| ENST00000299238 | Transcript | synonymous_variant           | 601/2646   |
| ENST00000592984 | Transcript | 3_prime_UTR_variant,intron_v | -/1634     |
| ENST00000287907 | Transcript | synonymous_variant           | 588/2912   |
| ENST00000342160 | Transcript | synonymous_variant           | 2567/14796 |
| ENST00000342160 | Transcript | missense_variant             | 6445/14796 |
| ENST00000407780 | Transcript | missense_variant             | 510/7080   |
| ENST00000407780 | Transcript | intron_variant               | -/7080     |
| ENST00000407780 | Transcript | 3_prime_UTR_variant          | 6946/7080  |
| ENST00000330062 | Transcript | intron_variant               | -/2694     |
| ENST00000299518 | Transcript | intron_variant               | -/4128     |
| ENST00000368131 | Transcript | missense_variant             | 826/2734   |
| ENST00000342136 | Transcript | missense_variant             | 354/2899   |
| ENST00000268035 | Transcript | intron_variant               | -/11803    |
| ENST00000356956 | Transcript | intron_variant               | -/9091     |
| ENST00000356956 | Transcript | 3_prime_UTR_variant,intron_v | -/9091     |
| ENST00000356956 | Transcript | intron_variant               | -/9091     |
| ENST00000270642 | Transcript | intron_variant               | -/2606     |
| ENST00000370903 | Transcript | synonymous_variant           | 1630/4594  |
| ENST00000370903 | Transcript | synonymous_variant           | 2854/4594  |
| ENST00000370903 | Transcript | intron_variant               | -/4594     |
| ENST00000393775 | Transcript | intron_variant               | -/3495     |
| ENST00000393775 | Transcript | missense_variant             | 1305/3495  |
| ENST00000393775 | Transcript | intron_variant               | -/3495     |
| ENST00000513874 | Transcript | 3_prime_UTR_variant,intron_v | -/4284     |
| ENST00000533871 | Transcript | intron_variant               | -/5050     |
| ENST00000374647 | Transcript | synonymous_variant           | 3377/5905  |
| ENST00000295981 | Transcript | intron_variant               | -/2621     |
| ENST00000316649 | Transcript | missense_variant             | 766/3485   |
| ENST00000270800 | Transcript | intron_variant               | -/2798     |
| ENST00000379959 | Transcript | 3_prime_UTR_variant          | 1063/3176  |
| ENST00000563197 | Transcript | 3_prime_UTR_variant          | 1809/2103  |
| ENST00000397262 | Transcript | 3_prime_UTR_variant          | 575/639    |
| ENST00000397270 | Transcript | intron_variant               | -/828      |
| ENST00000302850 | Transcript | synonymous_variant           | 1793/4721  |
| ENST00000302850 | Transcript | intron_variant               | -/4721     |
| ENST00000404767 | Transcript | intron_variant               | -/6959     |
| ENST00000404767 | Transcript | intron_variant               | -/6959     |
| ENST00000311234 | Transcript | intron_variant               | -/3662     |
| ENST00000274364 | Transcript | intron_variant               | -/5844     |
| ENST00000361170 | Transcript | intron_variant               | -/5988     |
| ENST00000538872 | Transcript | intron_variant               | -/7094     |
| ENST00000357234 | Transcript | intron_variant               | -/1680     |
| ENST00000244314 | Transcript | synonymous_variant           | 1156/1662  |

VEP annotated somatic variants

|                 |            |                                     |                |
|-----------------|------------|-------------------------------------|----------------|
| ENST00000369304 | Transcript | intron_variant                      | -/5269         |
| ENST00000369304 | Transcript | intron_variant                      | -/5269         |
| ENST00000397033 | Transcript | intron_variant                      | -/4189         |
| ENST00000264741 | Transcript | intron_variant                      | -/7889         |
| ENST00000266041 | Transcript | intron_variant                      | -/3336         |
| ENST00000266041 | Transcript | synonymous_variant                  | 487/3336       |
| ENST00000266041 | Transcript | intron_variant                      | -/3336         |
| ENST00000373298 | Transcript | intron_variant                      | -/1641         |
| ENST00000429204 | Transcript | intron_variant                      | -/6150         |
| ENST00000381340 | Transcript | intron_variant                      | -/10511        |
| ENST00000381340 | Transcript | intron_variant                      | -/10511        |
| ENST00000374316 | Transcript | 3_prime_UTR_variant,intron_v        | -/9870         |
| ENST00000278071 | Transcript | synonymous_variant                  | 1182/4362      |
| ENST00000381318 | Transcript | intron_variant                      | -/17015        |
| ENST00000381318 | Transcript | intron_variant                      | -/17015        |
| ENST00000226319 | Transcript | intron_variant                      | -/5771         |
| ENST00000218343 | Transcript | intron_variant                      | -/4931         |
| ENST00000298622 | Transcript | intron_variant                      | -/6626         |
| ENST00000341776 | Transcript | intron_variant                      | -/5755         |
| ENST00000341776 | Transcript | intron_variant                      | -/5755         |
| ENST00000341776 | Transcript | synonymous_variant                  | 1450/5755      |
| ENST00000458427 | Transcript | 3_prime_UTR_variant                 | 2279-2280/3570 |
| ENST00000382303 | Transcript | 3_prime_UTR_variant                 | 4765/5581      |
| ENST00000371153 | Transcript | intron_variant                      | -/4665         |
| ENST00000371153 | Transcript | synonymous_variant                  | 1957/4665      |
| ENST00000371153 | Transcript | synonymous_variant                  | 3160/4665      |
| ENST00000367411 | Transcript | synonymous_variant                  | 493/1894       |
| ENST00000221444 | Transcript | missense_variant                    | 922/4372       |
| ENST00000490337 | Transcript | intron_variant                      | -/3122         |
| ENST00000399881 | Transcript | intron_variant                      | -/3695         |
| ENST00000476647 | Transcript | intron_variant,non_coding_transcrip | -/5108         |
| ENST00000228495 | Transcript | intron_variant                      | -/4163         |
| ENST00000405872 | Transcript | 5_prime_UTR_variant                 | 348/2115       |
| ENST00000314358 | Transcript | intron_variant                      | -/6813         |
| ENST00000372396 | Transcript | intron_variant                      | -/4474         |
| ENST00000159111 | Transcript | intron_variant                      | -/5593         |
| ENST00000317961 | Transcript | intron_variant                      | -/5472         |
| ENST00000377967 | Transcript | missense_variant                    | 2218/5438      |
| ENST00000397560 | Transcript | intron_variant                      | -/9272         |
| ENST00000397560 | Transcript | synonymous_variant                  | 1710/9272      |
| ENST00000397560 | Transcript | missense_variant                    | 2028/9272      |
| ENST00000251993 | Transcript | synonymous_variant                  | 178/2723       |
| ENST00000264501 | Transcript | intron_variant                      | -/15896        |
| ENST00000251691 | Transcript | missense_variant                    | 2231/14877     |
| ENST00000297591 | Transcript | intron_variant                      | -/6528         |
| ENST00000392413 | Transcript | synonymous_variant                  | 3702/4402      |
| ENST00000368847 | Transcript | intron_variant                      | -/5958         |
| ENST00000367350 | Transcript | intron_variant                      | -/7274         |
| ENST00000247986 | Transcript | synonymous_variant                  | 581/3969       |
| ENST00000389916 | Transcript | intron_variant                      | -/3643         |
| ENST00000498729 | Transcript | intron_variant                      | -/9162         |
| ENST00000320785 | Transcript | intron_variant                      | -/7919         |
| ENST00000260753 | Transcript | intron_variant                      | -/6306         |
| ENST00000361580 | Transcript | intron_variant                      | -/2957         |
| ENST00000379562 | Transcript | intron_variant                      | -/6348         |

VEP annotated somatic variants

|                 |            |                                             |           |
|-----------------|------------|---------------------------------------------|-----------|
| ENST00000285407 | Transcript | synonymous_variant                          | 949/3097  |
| ENST00000514860 | Transcript | splice_region_variant,synonymous_variant    | 289/2442  |
| ENST00000273963 | Transcript | intron_variant                              | -/5621    |
| ENST00000356986 | Transcript | intron_variant                              | -/1206    |
| ENST00000262189 | Transcript | intron_variant                              | -/16862   |
| ENST00000304613 | Transcript | intron_variant                              | -/6793    |
| ENST00000333479 | Transcript | splice_region_variant,intron_variant        | -/6975    |
| ENST00000327442 | Transcript | synonymous_variant                          | 976/1725  |
| ENST00000290158 | Transcript | intron_variant                              | -/6139    |
| ENST00000327813 | Transcript | intron_variant                              | -/2719    |
| ENST00000269576 | Transcript | intron_variant                              | -/2124    |
| ENST00000225899 | Transcript | intron_variant                              | -/1750    |
| ENST00000328119 | Transcript | 3_prime_UTR_variant                         | 1471/1644 |
| ENST00000397911 | Transcript | 3_prime_UTR_variant                         | 932/1255  |
| ENST00000397907 | Transcript | 3_prime_UTR_variant                         | 372/410   |
| ENST00000391618 | Transcript | synonymous_variant                          | 375/447   |
| ENST00000216237 | Transcript | intron_variant                              | -/3296    |
| ENST00000421865 | Transcript | intron_variant                              | -/9640    |
| ENST00000421865 | Transcript | intron_variant                              | -/9640    |
| ENST00000230538 | Transcript | intron_variant                              | -/6547    |
| ENST00000230538 | Transcript | intron_variant                              | -/6547    |
| ENST00000258341 | Transcript | intron_variant                              | -/7889    |
| ENST00000258341 | Transcript | intron_variant                              | -/7889    |
| ENST00000258341 | Transcript | intron_variant                              | -/7889    |
| ENST00000264144 | Transcript | 5_prime_UTR_variant                         | 60/5147   |
| ENST00000543571 | Transcript | synonymous_variant                          | 1994/7517 |
| ENST00000333881 | Transcript | 5_prime_UTR_variant                         | 25/425    |
| ENST00000371688 | Transcript | intron_variant                              | -/867     |
| ENST00000344642 | Transcript | intron_variant                              | -/4012    |
| ENST00000308330 | Transcript | intron_variant                              | -/4764    |
| ENST00000222725 | Transcript | intron_variant                              | -/2377    |
| ENST00000291759 | Transcript | intron_variant                              | -/1944    |
| ENST00000336180 | Transcript | intron_variant                              | -/3219    |
| ENST00000585527 | Transcript | missense_variant                            | 1525/2241 |
| ENST00000267102 | Transcript | intron_variant                              | -/2349    |
| ENST00000465261 | Transcript | intron_variant                              | -/5580    |
| ENST00000231368 | Transcript | intron_variant                              | -/12752   |
| ENST00000398246 | Transcript | intron_variant                              | -/3594    |
| ENST00000371628 | Transcript | synonymous_variant                          | 73/2550   |
| ENST00000371628 | Transcript | intron_variant                              | -/2550    |
| ENST00000261921 | Transcript | intron_variant                              | -/2351    |
| ENST00000312675 | Transcript | intron_variant                              | -/18278   |
| ENST00000354454 | Transcript | intron_variant                              | -/2504    |
| ENST00000389484 | Transcript | intron_variant                              | -/16535   |
| ENST00000294304 | Transcript | intron_variant                              | -/5159    |
| ENST00000402859 | Transcript | missense_variant                            | 1086/1661 |
| ENST00000402859 | Transcript | intron_variant                              | -/1661    |
| ENST00000500728 | Transcript | intron_variant                              | -/7819    |
| ENST00000298288 | Transcript | intron_variant                              | -/1745    |
| ENST00000374160 | Transcript | missense_variant                            | 97/1617   |
| ENST00000360375 | Transcript | 3_prime_UTR_variant                         | 3300/3813 |
| ENST00000393217 | Transcript | intron_variant                              | -/5394    |
| ENST00000265245 | Transcript | missense_variant                            | 590/3572  |
| ENST00000544216 | Transcript | splice_region_variant,splice_region_variant | 790/3596  |
| ENST00000502781 | Transcript | 3_prime_UTR_variant                         | 1045/1352 |

VEP annotated somatic variants

|                 |            |                           |                |
|-----------------|------------|---------------------------|----------------|
| ENST00000397728 | Transcript | intron_variant            | -/4936         |
| ENST00000389194 | Transcript | intron_variant            | -/7749         |
| ENST00000336930 | Transcript | intron_variant            | -/3553         |
| ENST00000330743 | Transcript | intron_variant            | -/2022         |
| ENST00000368908 | Transcript | 5_prime_UTR_variant       | 603/2479       |
| ENST00000370220 | Transcript | downstream_gene_variant   | -/5741         |
| ENST00000370220 | Transcript | 5_prime_UTR_variant       | 3024/5741      |
| ENST00000406869 | Transcript | intron_variant            | -/2991         |
| ENST00000296509 | Transcript | intron_variant            | -/5468         |
| ENST00000356661 | Transcript | intron_variant            | -/1708         |
| ENST00000393900 | Transcript | synonymous_variant        | 1242/1853      |
| ENST00000378982 | Transcript | 5_prime_UTR_variant       | 161/2237       |
| ENST00000285879 | Transcript | intron_variant            | -/4270         |
| ENST00000247452 | Transcript | synonymous_variant        | 1257/1991      |
| ENST00000375068 | Transcript | intron_variant            | -/2189         |
| ENST00000317446 | Transcript | intron_variant            | -/3658         |
| ENST00000432680 | Transcript | synonymous_variant        | 2368/3224      |
| ENST00000368468 | Transcript | intron_variant            | -/5014         |
| ENST00000261483 | Transcript | synonymous_variant        | 2297/4667      |
| ENST00000285599 | Transcript | missense_variant          | 764/5143       |
| ENST00000324096 | Transcript | missense_variant          | 2745/3419      |
| ENST00000338883 | Transcript | missense_variant          | 574/4635       |
| ENST00000361357 | Transcript | intron_variant            | -/4818         |
| ENST00000591517 | Transcript | synonymous_variant        | 974/2700       |
| ENST00000347699 | Transcript | intron_variant            | -/3792         |
| ENST00000446044 | Transcript | intron_variant            | -/2988         |
| ENST00000251472 | Transcript | intron_variant            | -/4833         |
| ENST00000251472 | Transcript | region_variant,synonymous | 1050/4833      |
| ENST00000403625 | Transcript | 5_prime_UTR_variant       | 260/10711      |
| ENST00000537548 | Transcript | missense_variant          | 735/2282       |
| ENST00000265594 | Transcript | intron_variant            | -/2545         |
| ENST00000397708 | Transcript | intron_variant            | -/6333         |
| ENST00000434837 | Transcript | synonymous_variant        | 1608/8898      |
| ENST00000369393 | Transcript | intron_variant            | -/18413        |
| ENST00000369393 | Transcript | intron_variant            | -/18413        |
| ENST00000453960 | Transcript | synonymous_variant        | 1033/1685      |
| ENST00000324817 | Transcript | intron_variant            | -/7984         |
| ENST00000491289 | Transcript | 5_prime_UTR_variant       | 579/4380       |
| ENST00000312865 | Transcript | intron_variant            | -/2332         |
| ENST00000315588 | Transcript | missense_variant          | 468/3653       |
| ENST00000162023 | Transcript | intron_variant            | -/1623         |
| ENST00000356575 | Transcript | intron_variant            | -/5455         |
| ENST00000269202 | Transcript | intron_variant            | -/2312         |
| ENST00000295408 | Transcript | 3_prime_UTR_variant       | 3339-3340/3954 |
| ENST00000298717 | Transcript | intron_variant            | -/2015         |
| ENST00000375258 | Transcript | synonymous_variant        | 882/8203       |
| ENST00000398558 | Transcript | intron_variant            | -/2104         |
| ENST00000428789 | Transcript | synonymous_variant        | 1807/4053      |
| ENST00000428789 | Transcript | intron_variant            | -/4053         |
| ENST00000428789 | Transcript | synonymous_variant        | 1459/4053      |
| ENST00000306010 | Transcript | missense_variant          | 375/1759       |
| ENST00000441493 | Transcript | intron_variant            | -/9445         |
| ENST00000441493 | Transcript | intron_variant            | -/9445         |
| ENST00000441493 | Transcript | intron_variant            | -/9445         |
| ENST00000317552 | Transcript | intron_variant            | -/6463         |



VEP annotated somatic variants

|                 |            |                              |            |
|-----------------|------------|------------------------------|------------|
| ENST00000355280 | Transcript | intron_variant               | -/4961     |
| ENST00000355280 | Transcript | intron_variant               | -/4961     |
| ENST00000228506 | Transcript | intron_variant               | -/6626     |
| ENST00000366624 | Transcript | intron_variant               | -/5809     |
| ENST00000252674 | Transcript | intron_variant               | -/1931     |
| ENST00000368808 | Transcript | intron_variant               | -/1919     |
| ENST00000252971 | Transcript | intron_variant               | -/2174     |
| ENST00000357066 | Transcript | missense_variant             | 840/3391   |
| ENST00000355610 | Transcript | intron_variant               | -/3834     |
| ENST00000355610 | Transcript | missense_variant             | 1693/3834  |
| ENST00000379535 | Transcript | intron_variant               | -/2274     |
| ENST00000278949 | Transcript | intron_variant               | -/3964     |
| ENST00000323929 | Transcript | intron_variant               | -/2746     |
| ENST00000421030 | Transcript | missense_variant             | 1201/4329  |
| ENST00000421030 | Transcript | missense_variant             | 2138/4329  |
| ENST00000421030 | Transcript | missense_variant             | 1811/4329  |
| ENST00000290208 | Transcript | intron_variant               | -/2013     |
| ENST00000371443 | Transcript | intron_variant               | -/1262     |
| ENST00000342071 | Transcript | intron_variant               | -/894      |
| ENST00000053468 | Transcript | intron_variant               | -/2110     |
| ENST00000423302 | Transcript | 3_prime_UTR_variant,intron_v | -/6126     |
| ENST00000233146 | Transcript | intron_variant               | -/3307     |
| ENST00000261507 | Transcript | intron_variant               | -/2269     |
| ENST00000361445 | Transcript | synonymous_variant           | 6986/8677  |
| ENST00000366577 | Transcript | synonymous_variant           | 3538/10529 |
| ENST00000366577 | Transcript | intron_variant               | -/10529    |
| ENST00000366577 | Transcript | intron_variant               | -/10529    |
| ENST00000366577 | Transcript | intron_variant               | -/10529    |
| ENST00000457717 | Transcript | intron_variant               | -/4092     |
| ENST00000397910 | Transcript | 3_prime_UTR_variant,intron_v | -/43816    |
| ENST00000397910 | Transcript | synonymous_variant           | 7803/43816 |
| ENST00000454784 | Transcript | 5_prime_UTR_variant          | 273/19628  |
| ENST00000454784 | Transcript | intron_variant               | -/19628    |
| ENST00000441003 | Transcript | synonymous_variant           | 7689/8637  |
| ENST00000301012 | Transcript | intron_variant               | -/1823     |
| ENST00000217939 | Transcript | synonymous_variant           | 7508/9793  |
| ENST00000409745 | Transcript | synonymous_variant           | 478/2452   |
| ENST00000545968 | Transcript | intron_variant               | -/4217     |
| ENST00000396324 | Transcript | missense_variant             | 3809/6847  |
| ENST00000273353 | Transcript | intron_variant               | -/7074     |
| ENST00000355349 | Transcript | synonymous_variant           | 1258/6087  |
| ENST00000355349 | Transcript | intron_variant               | -/6087     |
| ENST00000355349 | Transcript | intron_variant               | -/6087     |
| ENST00000216181 | Transcript | intron_variant               | -/7501     |
| ENST00000360304 | Transcript | synonymous_variant           | 3840/7834  |
| ENST00000205890 | Transcript | intron_variant               | -/11863    |
| ENST00000335473 | Transcript | intron_variant               | -/8565     |
| ENST00000431794 | Transcript | intron_variant               | -/4054     |
| ENST00000338257 | Transcript | intron_variant               | -/4303     |
| ENST00000399231 | Transcript | intron_variant               | -/12225    |
| ENST00000595618 | Transcript | intron_variant               | -/7623     |
| ENST00000241651 | Transcript | 5_prime_UTR_variant          | 64/1528    |
| ENST00000358913 | Transcript | synonymous_variant           | 1622/6013  |
| ENST00000278836 | Transcript | intron_variant               | -/5927     |
| ENST00000472487 | Transcript | intron_variant               | -/7785     |

VEP annotated somatic variants

|                 |            |                           |           |
|-----------------|------------|---------------------------|-----------|
| ENST00000361671 | Transcript | intron_variant            | -/2649    |
| ENST00000371753 | Transcript | synonymous_variant        | 971/6802  |
| ENST00000312251 | Transcript | upstream_gene_variant     | -/2202    |
| ENST00000253719 | Transcript | missense_variant          | 1137/1548 |
| ENST00000357814 | Transcript | intron_variant            | -/1875    |
| ENST00000281513 | Transcript | intron_variant            | -/7281    |
| ENST00000422280 | Transcript | missense_variant          | 3227/4973 |
| ENST00000422280 | Transcript | intron_variant            | -/4973    |
| ENST00000422280 | Transcript | intron_variant            | -/4973    |
| ENST00000422280 | Transcript | intron_variant            | -/4973    |
| ENST00000252575 | Transcript | missense_variant          | 373/6387  |
| ENST00000315579 | Transcript | intron_variant            | -/5548    |
| ENST00000534548 | Transcript | intron_variant            | -/5061    |
| ENST00000240423 | Transcript | intron_variant            | -/2763    |
| ENST00000374796 | Transcript | intron_variant            | -/9311    |
| ENST00000268712 | Transcript | intron_variant            | -/10720   |
| ENST00000367993 | Transcript | synonymous_variant        | 1738/2042 |
| ENST00000397345 | Transcript | intron_variant            | -/26202   |
| ENST00000397345 | Transcript | intron_variant            | -/26202   |
| ENST00000397345 | Transcript | intron_variant            | -/26202   |
| ENST00000382882 | Transcript | synonymous_variant        | 2180/3343 |
| ENST00000366988 | Transcript | synonymous_variant        | 567/942   |
| ENST00000366988 | Transcript | intron_variant            | -/942     |
| ENST00000334785 | Transcript | missense_variant          | 1179/2607 |
| ENST00000226574 | Transcript | intron_variant            | -/4085    |
| ENST00000369966 | Transcript | intron_variant            | -/3101    |
| ENST00000326172 | Transcript | intron_variant            | -/3923    |
| ENST00000340650 | Transcript | synonymous_variant        | 326/2134  |
| ENST00000427025 | Transcript | intron_variant            | -/7500    |
| ENST00000264187 | Transcript | intron_variant            | -/5864    |
| ENST00000382041 | Transcript | intron_variant            | -/6496    |
| ENST00000374399 | Transcript | intron_variant            | -/1711    |
| ENST00000311946 | Transcript | missense_variant          | 753/3274  |
| ENST00000282516 | Transcript | intron_variant            | -/10435   |
| ENST00000216121 | Transcript | intron_variant            | -/2237    |
| ENST00000345716 | Transcript | intron_variant            | -/5238    |
| ENST00000258829 | Transcript | missense_variant          | 403/1261  |
| ENST00000358741 | Transcript | intron_variant            | -/3046    |
| ENST00000404025 | Transcript | intron_variant            | -/3581    |
| ENST00000390649 | Transcript | intron_variant            | -/3888    |
| ENST00000390649 | Transcript | region_variant,synonymous | 2955/3888 |
| ENST00000390649 | Transcript | intron_variant            | -/3888    |
| ENST00000332836 | Transcript | intron_variant            | -/3484    |
| ENST00000330579 | Transcript | intron_variant            | -/1632    |
| ENST00000297990 | Transcript | intron_variant            | -/4741    |
| ENST00000416614 | Transcript | intron_variant            | -/3538    |
| ENST00000329276 | Transcript | 3_prime_UTR_variant       | 2343/2400 |
| ENST00000361897 | Transcript | intron_variant            | -/4931    |
| ENST00000297494 | Transcript | missense_variant          | 1251/4388 |
| ENST00000297494 | Transcript | intron_variant            | -/4388    |
| ENST00000277541 | Transcript | intron_variant            | -/9371    |
| ENST00000277541 | Transcript | intron_variant            | -/9371    |
| ENST00000289547 | Transcript | synonymous_variant        | 3944/5048 |
| ENST00000277942 | Transcript | missense_variant          | 433/8921  |
| ENST00000359791 | Transcript | missense_variant          | 851/1410  |

VEP annotated somatic variants

|                 |            |                                    |                |
|-----------------|------------|------------------------------------|----------------|
| ENST00000265634 | Transcript | intron_variant                     | -/2700         |
| ENST00000312521 | Transcript | 5_prime_UTR_variant                | 233/5258       |
| ENST00000367980 | Transcript | upstream_gene_variant              | -/1408         |
| ENST00000354366 | Transcript | intron_variant                     | -/5828         |
| ENST00000439151 | Transcript | synonymous_variant                 | 3750/12892     |
| ENST00000264670 | Transcript | intron_variant                     | -/3303         |
| ENST00000422318 | Transcript | intron_variant                     | -/1795         |
| ENST00000301411 | Transcript | downstream_gene_variant            | -/999          |
| ENST00000355451 | Transcript | missense_variant                   | 983/8256       |
| ENST00000379161 | Transcript | intron_variant                     | -/3492         |
| ENST00000413272 | Transcript | synonymous_variant                 | 560/3887       |
| ENST00000229179 | Transcript | intron_variant                     | -/3653         |
| ENST00000359428 | Transcript | intron_variant                     | -/7600         |
| ENST00000340413 | Transcript | 5_prime_UTR_variant                | 34/3874        |
| ENST00000347635 | Transcript | 3_prime_UTR_variant                | 1929-1934/5233 |
| ENST00000264883 | Transcript | intron_variant                     | -/2367         |
| ENST00000264883 | Transcript | intron_variant                     | -/2367         |
| ENST00000573584 | Transcript | intron_variant                     | -/2916         |
| ENST00000573584 | Transcript | intron_variant                     | -/2916         |
| ENST00000395065 | Transcript | intron_variant                     | -/1938         |
| ENST00000537026 | Transcript | intron_variant                     | -/1613         |
| ENST00000537026 | Transcript | intron_variant                     | -/1613         |
| ENST00000537026 | Transcript | intron_variant                     | -/1613         |
| ENST00000336868 | Transcript | intron_variant                     | -/3036         |
| ENST00000479950 | Transcript | intron_variant                     | -/3330         |
| ENST00000404537 | Transcript | synonymous_variant                 | 1941/5841      |
| ENST00000329197 | Transcript | 3_prime_UTR_variant                | 1207/1652      |
| ENST00000323060 | Transcript | intron_variant                     | -/2250         |
| ENST00000316368 | Transcript | 3_prime_UTR_variant                | 1057/1071      |
| ENST00000323404 | Transcript | missense_variant                   | 374/948        |
| ENST00000314721 | Transcript | synonymous_variant                 | 596/1081       |
| ENST00000319760 | Transcript | missense_variant                   | 96/1071        |
| ENST00000314634 | Transcript | downstream_gene_variant            | -/933          |
| ENST00000380224 | Transcript | synonymous_variant                 | 707/983        |
| ENST00000317078 | Transcript | synonymous_variant                 | 570/963        |
| ENST00000304418 | Transcript | missense_variant                   | 933/1197       |
| ENST00000356526 | Transcript | synonymous_variant                 | 759/942        |
| ENST00000301532 | Transcript | synonymous_variant                 | 630/945        |
| ENST00000313033 | Transcript | 5_prime_UTR_variant                | 28/1118        |
| ENST00000313733 | Transcript | intron_variant                     | -/3970         |
| ENST00000361711 | Transcript | 3_prime_UTR_variant,intron_variant | -/2230         |
| ENST00000361711 | Transcript | synonymous_variant                 | 1327/2230      |
| ENST00000274276 | Transcript | intron_variant                     | -/5539         |
| ENST00000307050 | Transcript | intron_variant                     | -/3042         |
| ENST00000285848 | Transcript | inframe_insertion                  | 1434-1435/1728 |
| ENST00000374519 | Transcript | missense_variant                   | 713/1639       |
| ENST00000331483 | Transcript | synonymous_variant                 | 937/2603       |
| ENST00000372858 | Transcript | missense_variant                   | 1135/2753      |
| ENST00000320580 | Transcript | intron_variant                     | -/4392         |
| ENST00000289619 | Transcript | intron_variant                     | -/741          |
| ENST00000338448 | Transcript | intron_variant                     | -/2725         |
| ENST00000307534 | Transcript | intron_variant                     | -/3367         |
| ENST00000307534 | Transcript | synonymous_variant                 | 768/3367       |
| ENST00000378466 | Transcript | missense_variant                   | 1653/2649      |
| ENST00000238714 | Transcript | intron_variant                     | -/4263         |

VEP annotated somatic variants

|                 |            |                                             |            |
|-----------------|------------|---------------------------------------------|------------|
| ENST00000371279 | Transcript | missense_variant                            | 167/2347   |
| ENST00000334956 | Transcript | synonymous_variant                          | 1069/4458  |
| ENST00000406477 | Transcript | 3_prime_UTR_variant,intron_variant          | -/1569     |
| ENST00000429538 | Transcript | intron_variant                              | -/4084     |
| ENST00000527246 | Transcript | missense_variant                            | 313/2499   |
| ENST00000361849 | Transcript | intron_variant                              | -/6957     |
| ENST00000544246 | Transcript | missense_variant                            | 4054/6226  |
| ENST00000333891 | Transcript | intron_variant                              | -/20329    |
| ENST00000367384 | Transcript | missense_variant                            | 817/1938   |
| ENST00000359568 | Transcript | intron_variant                              | -/10560    |
| ENST00000311180 | Transcript | missense_variant                            | 170/8773   |
| ENST00000435564 | Transcript | upstream_gene_variant                       | -/4885     |
| ENST00000334456 | Transcript | synonymous_variant                          | 2451/4315  |
| ENST00000371447 | Transcript | synonymous_variant                          | 390/3307   |
| ENST00000257290 | Transcript | intron_variant                              | -/6576     |
| ENST00000261799 | Transcript | synonymous_variant                          | 3722/5717  |
| ENST00000261799 | Transcript | 3_prime_UTR_variant,intron_variant          | -/5717     |
| ENST00000376215 | Transcript | intron_variant                              | -/1626     |
| ENST00000396410 | Transcript | intron_variant                              | -/3884     |
| ENST00000396410 | Transcript | downstream_gene_variant                     | -/3884     |
| ENST00000370215 | Transcript | downstream_gene_variant                     | -/2032     |
| ENST00000560626 | Transcript | missense_variant                            | 5101/11715 |
| ENST00000338302 | Transcript | intron_variant                              | -/4970     |
| ENST00000338302 | Transcript | synonymous_variant                          | 234/4970   |
| ENST00000338302 | Transcript | synonymous_variant                          | 1545/4970  |
| ENST00000244137 | Transcript | missense_variant                            | 1337/1910  |
| ENST00000244137 | Transcript | 3_prime_UTR_variant                         | 1568/1910  |
| ENST00000381125 | Transcript | intron_variant                              | -/2645     |
| ENST00000381125 | Transcript | intron_variant                              | -/2645     |
| ENST00000354764 | Transcript | intron_variant                              | -/11114    |
| ENST00000373316 | Transcript | intron_variant                              | -/4887     |
| ENST00000340880 | Transcript | missense_variant                            | 1662/2230  |
| ENST00000290722 | Transcript | 5_prime_UTR_variant                         | 16/1173    |
| ENST00000359246 | Transcript | 3_prime_UTR_variant,intron_variant          | -/5565     |
| ENST00000275034 | Transcript | intron_variant                              | -/10460    |
| ENST00000373542 | Transcript | intron_variant                              | -/6020     |
| ENST00000361417 | Transcript | intron_variant                              | -/5753     |
| ENST00000416188 | Transcript | synonymous_variant                          | 474/5227   |
| ENST00000369738 | Transcript | 3_prime_UTR_variant                         | 950/2627   |
| ENST00000370812 | Transcript | intron_variant                              | -/4596     |
| ENST00000357637 | Transcript | synonymous_variant                          | 2426/5501  |
| ENST00000592983 | Transcript | missense_variant                            | 956/2333   |
| ENST00000447110 | Transcript | intron_variant                              | -/4488     |
| ENST00000264380 | Transcript | intron_variant                              | -/9901     |
| ENST00000360612 | Transcript | synonymous_variant                          | 567/2369   |
| ENST00000332271 | Transcript | intron_variant                              | -/3504     |
| ENST00000361478 | Transcript | synonymous_variant                          | 1548/2755  |
| ENST00000529079 | Transcript | 5_prime_UTR_variant,non_coding_exon_variant | 161/574    |
| ENST00000371117 | Transcript | intron_variant                              | -/16282    |
| ENST00000070846 | Transcript | intron_variant                              | -/4241     |
| ENST00000274793 | Transcript | intron_variant                              | -/1882     |
| ENST00000220809 | Transcript | intron_variant                              | -/2706     |
| ENST00000327757 | Transcript | intron_variant                              | -/5107     |
| ENST00000371380 | Transcript | intron_variant                              | -/12024    |
| ENST00000371380 | Transcript | intron_variant                              | -/12024    |

VEP annotated somatic variants

|                 |            |                                 |              |
|-----------------|------------|---------------------------------|--------------|
| ENST00000371380 | Transcript | intron_variant                  | -/12024      |
| ENST00000371380 | Transcript | missense_variant                | 5565/12024   |
| ENST00000359376 | Transcript | intron_variant                  | -/4308       |
| ENST00000449969 | Transcript | intron_variant                  | -/5450       |
| ENST00000449969 | Transcript | intron_variant                  | -/5450       |
| ENST00000322810 | Transcript | missense_variant                | 4546/15249   |
| ENST00000322810 | Transcript | synonymous_variant              | 959/15249    |
| ENST00000322810 | Transcript | 3_prime_UTR_variant             | 14235/15249  |
| ENST00000322810 | Transcript | synonymous_variant              | 8834/15249   |
| ENST00000322810 | Transcript | synonymous_variant              | 14042/15249  |
| ENST00000322810 | Transcript | synonymous_variant              | 11708/15249  |
| ENST00000537245 | Transcript | intron_variant                  | -/3381       |
| ENST00000329153 | Transcript | intron_variant                  | -/6604       |
| ENST00000329153 | Transcript | 3_prime_UTR_variant,intron_v    | -/6604       |
| ENST00000329153 | Transcript | intron_variant                  | -/6604       |
| ENST00000379410 | Transcript | intron_variant                  | -/2404       |
| ENST00000334770 | Transcript | intron_variant                  | -/2106       |
| ENST00000315392 | Transcript | intron_variant                  | -/6252       |
| ENST00000449103 | Transcript | intron_variant                  | -/6383       |
| ENST00000369239 | Transcript | intron_variant                  | -/5112       |
| ENST00000394571 | Transcript | missense_variant,splice_region_ | 1469/2478    |
| ENST00000216180 | Transcript | intron_variant                  | -/2805       |
| ENST00000414982 | Transcript | synonymous_variant              | 2316/4522    |
| ENST00000548729 | Transcript | intron_variant                  | -/5436       |
| ENST00000301788 | Transcript | intron_variant                  | -/827        |
| ENST00000377603 | Transcript | intron_variant                  | -/2416       |
| ENST00000377603 | Transcript | intron_variant                  | -/2416       |
| ENST00000379747 | Transcript | intron_variant                  | -/3373       |
| ENST00000465342 | Transcript | missense_variant                | 1702/5357    |
| ENST00000287820 | Transcript | missense_variant                | 155/1850     |
| ENST00000287820 | Transcript | synonymous_variant              | 1552/1850    |
| ENST00000412327 | Transcript | intron_variant                  | -/2709       |
| ENST00000308249 | Transcript | inframe_insertion               | 228-229/2988 |
| ENST00000367999 | Transcript | intron_variant                  | -/1740       |
| ENST00000330261 | Transcript | intron_variant                  | -/782        |
| ENST00000455566 | Transcript | 3_prime_UTR_variant             | 1284/5133    |
| ENST00000264977 | Transcript | intron_variant                  | -/6795       |
| ENST00000218224 | Transcript | 3_prime_UTR_variant,intron_v    | -/1110       |
| ENST00000264808 | Transcript | intron_variant                  | -/5330       |
| ENST00000339711 | Transcript | intron_variant                  | -/4095       |
| ENST00000379341 | Transcript | intron_variant                  | -/1005       |
| ENST00000379341 | Transcript | intron_variant                  | -/1005       |
| ENST00000379341 | Transcript | intron_variant                  | -/1005       |
| ENST00000369110 | Transcript | intron_variant                  | -/2905       |
| ENST00000288368 | Transcript | intron_variant                  | -/10750      |
| ENST00000311862 | Transcript | intron_variant                  | -/1424       |
| ENST00000314970 | Transcript | 5_prime_UTR_variant             | 387/2289     |
| ENST00000394729 | Transcript | intron_variant                  | -/2810       |
| ENST00000394729 | Transcript | intron_variant                  | -/2810       |
| ENST00000378567 | Transcript | intron_variant                  | -/2326       |
| ENST00000324366 | Transcript | intron_variant                  | -/2531       |
| ENST00000419421 | Transcript | missense_variant                | 650/1392     |
| ENST00000403581 | Transcript | intron_variant                  | -/2279       |
| ENST00000352766 | Transcript | intron_variant                  | -/2043       |
| ENST00000268281 | Transcript | intron_variant                  | -/2840       |

VEP annotated somatic variants

|                 |            |                                     |             |
|-----------------|------------|-------------------------------------|-------------|
| ENST00000376718 | Transcript | intron_variant                      | -/12584     |
| ENST00000406487 | Transcript | intron_variant                      | -/1538      |
| ENST00000406070 | Transcript | intron_variant                      | -/2025      |
| ENST00000270077 | Transcript | intron_variant                      | -/1705      |
| ENST00000356126 | Transcript | 3_prime_UTR_variant,intron_v        | -/4406      |
| ENST00000331573 | Transcript | intron_variant                      | -/2154      |
| ENST00000317615 | Transcript | 5_prime_UTR_variant                 | 643/1686    |
| ENST00000407693 | Transcript | intron_variant                      | -/1407      |
| ENST00000254667 | Transcript | intron_variant                      | -/5331      |
| ENST00000359947 | Transcript | intron_variant                      | -/7727      |
| ENST00000474889 | Transcript | intron_variant                      | -/9021      |
| ENST00000368213 | Transcript | intron_variant                      | -/5816      |
| ENST00000389418 | Transcript | synonymous_variant                  | 2425/4706   |
| ENST00000293922 | Transcript | intron_variant                      | -/1422      |
| ENST00000426105 | Transcript | intron_variant                      | -/4043      |
| ENST00000426105 | Transcript | intron_variant                      | -/4043      |
| ENST00000426105 | Transcript | intron_variant                      | -/4043      |
| ENST00000426105 | Transcript | intron_variant                      | -/4043      |
| ENST00000302000 | Transcript | intron_variant                      | -/8488      |
| ENST00000240651 | Transcript | 5_prime_UTR_variant                 | 11/3169     |
| ENST00000325874 | Transcript | intron_variant                      | -/8629      |
| ENST00000264601 | Transcript | missense_variant                    | 686/1966    |
| ENST00000243662 | Transcript | 5_prime_UTR_variant                 | 73/1465     |
| ENST00000276066 | Transcript | intron_variant                      | -/1071      |
| ENST00000262477 | Transcript | intron_variant                      | -/5387      |
| ENST00000399409 | Transcript | synonymous_variant                  | 1906/2265   |
| ENST00000306897 | Transcript | intron_variant                      | -/1090      |
| ENST00000487270 | Transcript | intron_variant                      | -/2596      |
| ENST00000399583 | Transcript | synonymous_variant                  | 2363/3689   |
| ENST00000251849 | Transcript | intron_variant                      | -/3300      |
| ENST00000515799 | Transcript | intron_variant                      | -/3486      |
| ENST00000290101 | Transcript | intron_variant                      | -/3301      |
| ENST00000449771 | Transcript | intron_variant                      | -/3370      |
| ENST00000298854 | Transcript | intron_variant                      | -/1671      |
| ENST00000357043 | Transcript | missense_variant                    | 119/1864    |
| ENST00000377604 | Transcript | synonymous_variant                  | 3121/3747   |
| ENST00000267229 | Transcript | intron_variant                      | -/3624      |
| ENST00000265271 | Transcript | intron_variant                      | -/6451      |
| ENST00000339877 | Transcript | intron_variant                      | -/1341      |
| ENST00000377966 | Transcript | synonymous_variant                  | 2126/4888   |
| ENST00000221452 | Transcript | intron_variant                      | -/2294      |
| ENST00000258062 | Transcript | intron_variant                      | -/3161      |
| ENST00000295755 | Transcript | 5_prime_UTR_variant,frameshift_vari | 238-239/676 |
| ENST00000354373 | Transcript | 5_prime_UTR_variant                 | 195/1496    |
| ENST00000296292 | Transcript | synonymous_variant                  | 1685/5108   |
| ENST00000296292 | Transcript | intron_variant                      | -/5108      |
| ENST00000334133 | Transcript | intron_variant                      | -/2982      |
| ENST00000393423 | Transcript | 5_prime_UTR_variant                 | 47/2278     |
| ENST00000366565 | Transcript | 3_prime_UTR_variant,intron_v        | -/2494      |
| ENST00000538017 | Transcript | 5_prime_UTR_variant                 | 125/1394    |
| ENST00000332512 | Transcript | synonymous_variant                  | 2396/3889   |
| ENST00000283632 | Transcript | intron_variant                      | -/6301      |
| ENST00000283632 | Transcript | 5_prime_UTR_variant                 | 488/6301    |
| ENST00000221486 | Transcript | intron_variant                      | -/1165      |
| ENST00000367559 | Transcript | synonymous_variant                  | 377/4238    |

VEP annotated somatic variants

|                 |            |                               |              |
|-----------------|------------|-------------------------------|--------------|
| ENST00000587250 | Transcript | 3_prime_UTR_variant           | 866/1339     |
| ENST00000347063 | Transcript | intron_variant                | -/1604       |
| ENST00000373456 | Transcript | intron_variant                | -/2560       |
| ENST00000399398 | Transcript | 3_prime_UTR_variant           | 1009/3062    |
| ENST00000464233 | Transcript | intron_variant                | -/6742       |
| ENST00000464233 | Transcript | intron_variant                | -/6742       |
| ENST00000315872 | Transcript | missense_variant              | 1741/8292    |
| ENST00000371079 | Transcript | intron_variant                | -/5832       |
| ENST00000368508 | Transcript | intron_variant                | -/7435       |
| ENST00000434291 | Transcript | intron_variant                | -/1818       |
| ENST00000422931 | Transcript | downstream_gene_variant       | -/865        |
| ENST00000472454 | Transcript | downstream_gene_variant       | -/1615       |
| ENST00000518559 | Transcript | variant,non_coding_transcript | -/4427       |
| ENST00000428747 | Transcript | upstream_gene_variant         | -/3105       |
| ENST00000005386 | Transcript | intron_variant                | -/2332       |
| ENST00000331302 | Transcript | intron_variant                | -/2606       |
| ENST00000222247 | Transcript | intron_variant                | -/665        |
| ENST00000422514 | Transcript | 5_prime_UTR_variant           | 605-606/1562 |
| ENST00000422514 | Transcript | 5_prime_UTR_variant           | 606-607/1562 |
| ENST00000216146 | Transcript | synonymous_variant            | 285/1442     |
| ENST00000316084 | Transcript | synonymous_variant            | 597/1526     |
| ENST00000503859 | Transcript | intron_variant                | -/4137       |
| ENST00000306801 | Transcript | intron_variant                | -/6408       |
| ENST00000306801 | Transcript | synonymous_variant            | 2888/6408    |
| ENST00000340648 | Transcript | intron_variant                | -/5088       |
| ENST00000340648 | Transcript | synonymous_variant            | 720/5088     |
| ENST00000258955 | Transcript | synonymous_variant            | 667/2528     |
| ENST00000377921 | Transcript | intron_variant                | -/3919       |
| ENST00000377819 | Transcript | missense_variant              | 1566/4937    |
| ENST00000319449 | Transcript | intron_variant                | -/2646       |
| ENST00000319449 | Transcript | synonymous_variant            | 2076/2646    |
| ENST00000388768 | Transcript | upstream_gene_variant         | -/4512       |
| ENST00000481739 | Transcript | intron_variant                | -/1846       |
| ENST00000359596 | Transcript | synonymous_variant            | 3456/15117   |
| ENST00000359596 | Transcript | intron_variant                | -/15117      |
| ENST00000359596 | Transcript | synonymous_variant            | 6384/15117   |
| ENST00000359596 | Transcript | intron_variant                | -/15117      |
| ENST00000366574 | Transcript | intron_variant                | -/16562      |
| ENST00000366574 | Transcript | intron_variant                | -/16562      |
| ENST00000389232 | Transcript | intron_variant                | -/15559      |
| ENST00000382533 | Transcript | intron_variant                | -/2298       |
| ENST00000371872 | Transcript | intron_variant                | -/3344       |
| ENST00000246868 | Transcript | intron_variant                | -/1631       |
| ENST00000380817 | Transcript | synonymous_variant            | 5743/8008    |
| ENST00000256190 | Transcript | intron_variant                | -/7439       |
| ENST00000360565 | Transcript | intron_variant                | -/4306       |
| ENST00000302631 | Transcript | synonymous_variant            | 486/1446     |
| ENST00000266214 | Transcript | intron_variant                | -/3278       |
| ENST00000349847 | Transcript | intron_variant                | -/2386       |
| ENST00000297029 | Transcript | missense_variant              | 283/3137     |
| ENST00000281142 | Transcript | intron_variant                | -/3055       |
| ENST00000281142 | Transcript | intron_variant                | -/3055       |
| ENST00000369020 | Transcript | downstream_gene_variant       | -/1491       |
| ENST00000283254 | Transcript | intron_variant                | -/9091       |
| ENST00000409672 | Transcript | missense_variant              | 3795/9768    |

VEP annotated somatic variants

|                 |            |                              |            |
|-----------------|------------|------------------------------|------------|
| ENST00000409672 | Transcript | intron_variant               | -/9768     |
| ENST00000272091 | Transcript | upstream_gene_variant        | -/3975     |
| ENST00000404826 | Transcript | intron_variant               | -/10397    |
| ENST00000350697 | Transcript | intron_variant               | -/1425     |
| ENST00000402034 | Transcript | missense_variant             | 58/3392    |
| ENST00000308284 | Transcript | intron_variant               | -/3985     |
| ENST00000336714 | Transcript | missense_variant             | 1899/3411  |
| ENST00000280551 | Transcript | intron_variant               | -/4030     |
| ENST00000370345 | Transcript | intron_variant               | -/4612     |
| ENST00000370345 | Transcript | intron_variant               | -/4612     |
| ENST00000370345 | Transcript | missense_variant             | 364/4612   |
| ENST00000370345 | Transcript | intron_variant               | -/4612     |
| ENST00000375807 | Transcript | intron_variant               | -/3454     |
| ENST00000269389 | Transcript | missense_variant             | 1081/2235  |
| ENST00000333360 | Transcript | intron_variant               | -/3857     |
| ENST00000263686 | Transcript | intron_variant               | -/3142     |
| ENST00000265362 | Transcript | intron_variant               | -/8225     |
| ENST00000265362 | Transcript | intron_variant               | -/8225     |
| ENST00000002829 | Transcript | intron_variant               | -/3802     |
| ENST00000396426 | Transcript | intron_variant               | -/2586     |
| ENST00000467132 | Transcript | intron_variant               | -/2660     |
| ENST00000357949 | Transcript | intron_variant               | -/2114     |
| ENST00000267197 | Transcript | intron_variant               | -/8195     |
| ENST00000267197 | Transcript | intron_variant               | -/8195     |
| ENST00000402198 | Transcript | intron_variant               | -/6827     |
| ENST00000248933 | Transcript | synonymous_variant           | 206/3248   |
| ENST00000302516 | Transcript | intron_variant               | -/6969     |
| ENST00000367569 | Transcript | 5_prime_UTR_variant          | 70/737     |
| ENST00000373202 | Transcript | intron_variant               | -/5745     |
| ENST00000268989 | Transcript | intron_variant               | -/4863     |
| ENST00000268989 | Transcript | intron_variant               | -/4863     |
| ENST00000248929 | Transcript | intron_variant               | -/2969     |
| ENST00000482504 | Transcript | downstream_gene_varian       | -/1199     |
| ENST00000355946 | Transcript | synonymous_variant           | 1742/11245 |
| ENST00000293441 | Transcript | intron_variant               | -/6643     |
| ENST00000293441 | Transcript | 3_prime_UTR_variant,intron_v | -/6643     |
| ENST00000297261 | Transcript | intron_variant               | -/4454     |
| ENST00000380913 | Transcript | missense_variant             | 3046/7447  |
| ENST00000291707 | Transcript | intron_variant               | -/2121     |
| ENST00000270162 | Transcript | intron_variant               | -/4712     |
| ENST00000290399 | Transcript | intron_variant               | -/4442     |
| ENST00000366630 | Transcript | intron_variant               | -/6690     |
| ENST00000368043 | Transcript | intron_variant               | -/2689     |
| ENST00000273861 | Transcript | synonymous_variant           | 315/1790   |
| ENST00000273905 | Transcript | missense_variant             | 488/1502   |
| ENST00000264930 | Transcript | intron_variant               | -/5272     |
| ENST00000194130 | Transcript | intron_variant               | -/3815     |
| ENST00000587091 | Transcript | missense_variant             | 274/4161   |
| ENST00000221742 | Transcript | intron_variant               | -/1719     |
| ENST00000221742 | Transcript | intron_variant               | -/1719     |
| ENST00000245407 | Transcript | synonymous_variant           | 506/3237   |
| ENST00000353963 | Transcript | intron_variant               | -/2303     |
| ENST00000532405 | Transcript | synonymous_variant           | 721/4718   |
| ENST00000416240 | Transcript | intron_variant               | -/3192     |
| ENST00000377095 | Transcript | intron_variant               | -/1565     |



VEP annotated somatic variants

|                 |            |                                           |             |
|-----------------|------------|-------------------------------------------|-------------|
| ENST00000377095 | Transcript | intron_variant                            | -/1565      |
| ENST00000361193 | Transcript | intron_variant                            | -/2885      |
| ENST00000394573 | Transcript | intron_variant                            | -/2750      |
| ENST00000347644 | Transcript | intron_variant                            | -/2464      |
| ENST00000373371 | Transcript | intron_variant                            | -/2172      |
| ENST00000378509 | Transcript | intron_variant                            | -/6797      |
| ENST00000360388 | Transcript | intron_variant                            | -/4852      |
| ENST00000366618 | Transcript | intron_variant                            | -/2891      |
| ENST00000308074 | Transcript | intron_variant                            | -/2696      |
| ENST00000420502 | Transcript | intron_variant,non_coding_transcript      | -/2470      |
| ENST00000570101 | Transcript | intron_variant                            | -/4549      |
| ENST00000024061 | Transcript | synonymous_variant                        | 1964/3546   |
| ENST00000485713 | Transcript | intron_variant                            | -/4925      |
| ENST00000222248 | Transcript | intron_variant                            | -/3576      |
| ENST00000371900 | Transcript | intron_variant                            | -/4521      |
| ENST00000335875 | Transcript | intron_variant                            | -/2938      |
| ENST00000401766 | Transcript | intron_variant                            | -/6543      |
| ENST00000360584 | Transcript | downstream_gene_variant                   | -/2330      |
| ENST00000316902 | Transcript | intron_variant                            | -/4216      |
| ENST00000316902 | Transcript | synonymous_variant                        | 1872/4216   |
| ENST00000328306 | Transcript | synonymous_variant                        | 170/3838    |
| ENST00000310926 | Transcript | intron_variant                            | -/4223      |
| ENST00000371122 | Transcript | intron_variant                            | -/4099      |
| ENST00000283131 | Transcript | intron_variant                            | -/7923      |
| ENST00000357450 | Transcript | intron_variant                            | -/4201      |
| ENST00000361956 | Transcript | synonymous_variant                        | 389/2040    |
| ENST00000358743 | Transcript | intron_variant                            | -/3198      |
| ENST00000388985 | Transcript | 3_prime_UTR_variant,intron_variant        | -/1287      |
| ENST00000371247 | Transcript | intron_variant                            | -/7354      |
| ENST00000507866 | Transcript | 3_prime_UTR_variant,intron_variant        | -/6152      |
| ENST00000336338 | Transcript | synonymous_variant                        | 633/6924    |
| ENST00000336338 | Transcript | synonymous_variant                        | 1458/6924   |
| ENST00000370498 | Transcript | synonymous_variant                        | 994/1377    |
| ENST00000377470 | Transcript | intron_variant                            | -/1954      |
| ENST00000312358 | Transcript | intron_variant                            | -/10782     |
| ENST00000312358 | Transcript | missense_variant                          | 7298/10782  |
| ENST00000301244 | Transcript | missense_variant                          | 1033/1802   |
| ENST00000373109 | Transcript | synonymous_variant                        | 457/5445    |
| ENST00000320955 | Transcript | intron_variant                            | -/11722     |
| ENST00000320955 | Transcript | intron_variant                            | -/11722     |
| ENST00000262518 | Transcript | missense_variant                          | 4988/10474  |
| ENST00000378016 | Transcript | 3_prime_UTR_variant,non_coding_transcript | 12321/15583 |
| ENST00000378016 | Transcript | non_coding_transcript                     | -/15583     |
| ENST00000378016 | Transcript | 3_prime_UTR_variant,non_coding_transcript | 12765/15583 |
| ENST00000544814 | Transcript | intron_variant                            | -/1182      |
| ENST00000393640 | Transcript | 3_prime_UTR_variant                       | 3186/5345   |
| ENST00000225276 | Transcript | intron_variant                            | -/2170      |
| ENST00000225276 | Transcript | intron_variant                            | -/2170      |
| ENST00000335791 | Transcript | intron_variant                            | -/1691      |
| ENST00000388887 | Transcript | synonymous_variant                        | 3909/8251   |
| ENST00000394070 | Transcript | intron_variant                            | -/6691      |
| ENST00000265404 | Transcript | synonymous_variant                        | 463/1511    |
| ENST00000290607 | Transcript | intron_variant                            | -/15567     |
| ENST00000392320 | Transcript | intron_variant                            | -/2822      |
| ENST00000293328 | Transcript | intron_variant                            | -/5103      |

VEP annotated somatic variants

|                 |            |                               |           |
|-----------------|------------|-------------------------------|-----------|
| ENST00000524300 | Transcript | intron_variant                | -/3065    |
| ENST00000316900 | Transcript | synonymous_variant            | 779/2053  |
| ENST00000392359 | Transcript | 5_prime_UTR_variant           | 39/805    |
| ENST00000275764 | Transcript | downstream_gene_variant       | -/993     |
| ENST00000447404 | Transcript | intron_variant                | -/6290    |
| ENST00000369795 | Transcript | intron_variant                | -/3265    |
| ENST00000249344 | Transcript | intron_variant                | -/5115    |
| ENST00000321680 | Transcript | intron_variant                | -/3456    |
| ENST00000075503 | Transcript | missense_variant              | 1131/2995 |
| ENST00000248600 | Transcript | downstream_gene_variant       | -/1415    |
| ENST00000362032 | Transcript | 3_prime_UTR_variant           | 1153/4179 |
| ENST00000332859 | Transcript | intron_variant                | -/1807    |
| ENST00000326669 | Transcript | missense_variant              | 196/683   |
| ENST00000599117 | Transcript | intron_variant                | -/3902    |
| ENST00000599117 | Transcript | intron_variant                | -/3902    |
| ENST00000375472 | Transcript | intron_variant                | -/1195    |
| ENST00000318950 | Transcript | intron_variant                | -/4882    |
| ENST00000245934 | Transcript | synonymous_variant            | 3626/4195 |
| ENST00000432424 | Transcript | variant,non_coding_transcript | -/3897    |
| ENST00000358025 | Transcript | synonymous_variant            | 629/21875 |
| ENST00000358025 | Transcript | intron_variant                | -/21875   |
| ENST00000355585 | Transcript | synonymous_variant            | 2925/7378 |
| ENST00000336292 | Transcript | missense_variant              | 1817/7322 |
| ENST00000307142 | Transcript | missense_variant              | 657/7295  |
| ENST00000367456 | Transcript | synonymous_variant            | 2017/4553 |
| ENST00000367456 | Transcript | intron_variant                | -/4553    |
| ENST00000313288 | Transcript | missense_variant              | 1647/2781 |
| ENST00000372907 | Transcript | intron_variant                | -/2341    |
| ENST00000367066 | Transcript | intron_variant                | -/3887    |
| ENST00000367066 | Transcript | synonymous_variant            | 536/3887  |
| ENST00000335968 | Transcript | intron_variant                | -/3610    |
| ENST00000335968 | Transcript | intron_variant                | -/3610    |
| ENST00000287652 | Transcript | missense_variant              | 1817/5342 |
| ENST00000287652 | Transcript | intron_variant                | -/5342    |
| ENST00000337137 | Transcript | missense_variant              | 504/3787  |
| ENST00000377636 | Transcript | intron_variant                | -/6364    |
| ENST00000446818 | Transcript | missense_variant              | 2416/3124 |
| ENST00000273980 | Transcript | intron_variant                | -/8101    |
| ENST00000335385 | Transcript | intron_variant                | -/1548    |
| ENST00000372780 | Transcript | missense_variant              | 422/1100  |
| ENST00000418390 | Transcript | missense_variant              | 1758/5154 |
| ENST00000296702 | Transcript | intron_variant                | -/4654    |
| ENST00000215838 | Transcript | 3_prime_UTR_variant           | 1860/2535 |
| ENST00000409874 | Transcript | synonymous_variant            | 867/4782  |
| ENST00000422452 | Transcript | intron_variant                | -/12891   |
| ENST00000518659 | Transcript | intron_variant                | -/8550    |
| ENST00000603068 | Transcript | intron_variant                | -/2894    |
| ENST00000409262 | Transcript | intron_variant                | -/10983   |
| ENST00000240361 | Transcript | intron_variant                | -/4911    |
| ENST00000258991 | Transcript | intron_variant                | -/5232    |
| ENST00000380473 | Transcript | splice_acceptor_variant       | -/1478    |
| ENST00000367166 | Transcript | synonymous_variant            | 689/1424  |
| ENST00000310125 | Transcript | missense_variant              | 516/1680  |
| ENST00000391759 | Transcript | intron_variant                | -/1205    |
| ENST00000212355 | Transcript | intron_variant                | -/6416    |

VEP annotated somatic variants

|                 |            |                              |            |
|-----------------|------------|------------------------------|------------|
| ENST00000561129 | Transcript | missense_variant             | 719/928    |
| ENST00000452443 | Transcript | synonymous_variant           | 782/2313   |
| ENST00000366787 | Transcript | intron_variant               | -/5811     |
| ENST00000342640 | Transcript | intron_variant               | -/1326     |
| ENST00000423059 | Transcript | synonymous_variant           | 1986/10663 |
| ENST00000288014 | Transcript | 3_prime_UTR_variant          | 2720/2860  |
| ENST00000505747 | Transcript | intron_variant               | -/1970     |
| ENST00000286827 | Transcript | intron_variant               | -/7200     |
| ENST00000461783 | Transcript | intron_variant               | -/6981     |
| ENST00000248244 | Transcript | synonymous_variant           | 1901/2676  |
| ENST00000169551 | Transcript | 3_prime_UTR_variant          | 1061/1527  |
| ENST00000423516 | Transcript | intron_variant               | -/2075     |
| ENST00000423516 | Transcript | intron_variant               | -/2075     |
| ENST00000292090 | Transcript | 5_prime_UTR_variant          | 79/1017    |
| ENST00000558939 | Transcript | synonymous_variant           | 3067/6004  |
| ENST00000558939 | Transcript | intron_variant               | -/6004     |
| ENST00000346027 | Transcript | intron_variant               | -/3449     |
| ENST00000061240 | Transcript | missense_variant             | 3519/6708  |
| ENST00000357947 | Transcript | intron_variant               | -/6756     |
| ENST00000357947 | Transcript | intron_variant               | -/6756     |
| ENST00000357947 | Transcript | synonymous_variant           | 2758/6756  |
| ENST00000561311 | Transcript | intron_variant               | -/11880    |
| ENST00000233638 | Transcript | 5_prime_UTR_variant          | 157/2136   |
| ENST00000288025 | Transcript | missense_variant             | 72/938     |
| ENST00000186436 | Transcript | intron_variant               | -/6640     |
| ENST00000275767 | Transcript | missense_variant             | 243/1997   |
| ENST00000515780 | Transcript | intron_variant               | -/3296     |
| ENST00000316916 | Transcript | intron_variant               | -/2813     |
| ENST00000515837 | Transcript | intron_variant               | -/1955     |
| ENST00000341871 | Transcript | synonymous_variant           | 838/3106   |
| ENST00000334830 | Transcript | 3_prime_UTR_variant          | 2019/3054  |
| ENST00000237289 | Transcript | intron_variant               | -/4432     |
| ENST00000223795 | Transcript | synonymous_variant           | 390/1906   |
| ENST00000430969 | Transcript | synonymous_variant           | 5167/10562 |
| ENST00000254051 | Transcript | intron_variant               | -/4067     |
| ENST00000254051 | Transcript | missense_variant             | 1652/4067  |
| ENST00000382044 | Transcript | missense_variant             | 1202/6231  |
| ENST00000382044 | Transcript | missense_variant             | 3549/6231  |
| ENST00000382044 | Transcript | intron_variant               | -/6231     |
| ENST00000334295 | Transcript | synonymous_variant           | 536/4030   |
| ENST00000538887 | Transcript | intron_variant               | -/1542     |
| ENST00000360578 | Transcript | intron_variant               | -/5116     |
| ENST00000360578 | Transcript | synonymous_variant           | 719/5116   |
| ENST00000345063 | Transcript | 3_prime_UTR_variant,intron_v | -/5479     |
| ENST00000006275 | Transcript | intron_variant               | -/805      |
| ENST00000330149 | Transcript | intron_variant               | -/3242     |
| ENST00000330149 | Transcript | intron_variant               | -/3242     |
| ENST00000372922 | Transcript | missense_variant             | 3063/7286  |
| ENST00000330912 | Transcript | intron_variant               | -/2262     |
| ENST00000376694 | Transcript | intron_variant               | -/2214     |
| ENST00000377199 | Transcript | intron_variant               | -/2967     |
| ENST00000334634 | Transcript | intron_variant               | -/3061     |
| ENST00000291416 | Transcript | intron_variant               | -/3437     |
| ENST00000366653 | Transcript | missense_variant             | 2035/3936  |
| ENST00000298355 | Transcript | 3_prime_UTR_variant,intron_v | -/5284     |

VEP annotated somatic variants

|                 |            |                                |             |
|-----------------|------------|--------------------------------|-------------|
| ENST00000298355 | Transcript | intron_variant                 | -/5284      |
| ENST00000344204 | Transcript | synonymous_variant             | 4422/11100  |
| ENST00000200457 | Transcript | missense_variant               | 412/1942    |
| ENST00000592062 | Transcript | synonymous_variant             | 2125/2579   |
| ENST00000372936 | Transcript | intron_variant                 | -/3327      |
| ENST00000252015 | Transcript | intron_variant                 | -/3226      |
| ENST00000542188 | Transcript | intron_variant                 | -/5715      |
| ENST00000155858 | Transcript | missense_variant               | 1012/3929   |
| ENST00000313478 | Transcript | intron_variant                 | -/7263      |
| ENST00000418703 | Transcript | intron_variant                 | -/3247      |
| ENST00000298552 | Transcript | missense_variant               | 1187/8604   |
| ENST00000298552 | Transcript | intron_variant                 | -/8604      |
| ENST00000219476 | Transcript | intron_variant                 | -/6156      |
| ENST00000372003 | Transcript | intron_variant                 | -/1615      |
| ENST00000373020 | Transcript | missense_variant               | 434/2206    |
| ENST00000378482 | Transcript | intron_variant                 | -/1909      |
| ENST00000399635 | Transcript | synonymous_variant             | 1618/1814   |
| ENST00000259750 | Transcript | intron_variant                 | -/6932      |
| ENST00000259750 | Transcript | missense_variant               | 1951/6932   |
| ENST00000310715 | Transcript | intron_variant                 | -/3703      |
| ENST00000261647 | Transcript | intron_variant                 | -/3002      |
| ENST00000397906 | Transcript | missense_variant               | 320/11793   |
| ENST00000368586 | Transcript | intron_variant                 | -/8278      |
| ENST00000368586 | Transcript | 5_prime_UTR_variant            | 77/8278     |
| ENST00000368586 | Transcript | intron_variant                 | -/8278      |
| ENST00000368586 | Transcript | synonymous_variant             | 2975/8278   |
| ENST00000368586 | Transcript | intron_variant                 | -/8278      |
| ENST00000266254 | Transcript | region_variant,synonymous      | 991/1645    |
| ENST00000393382 | Transcript | synonymous_variant             | 745/3551    |
| ENST00000305253 | Transcript | intron_variant                 | -/6420      |
| ENST00000283645 | Transcript | 3_prime_UTR_variant            | 3282/3849   |
| ENST00000248846 | Transcript | intron_variant                 | -/5612      |
| ENST00000367097 | Transcript | synonymous_variant             | 1954/11123  |
| ENST00000367097 | Transcript | intron_variant                 | -/11123     |
| ENST00000548315 | Transcript | intron_variant                 | -/1170      |
| ENST00000395681 | Transcript | intron_variant                 | -/1604      |
| ENST00000319294 | Transcript | intron_variant                 | -/2504      |
| ENST00000284273 | Transcript | intron_variant                 | -/6912      |
| ENST00000348165 | Transcript | synonymous_variant             | 1863/5229   |
| ENST00000375254 | Transcript | 3_prime_UTR_variant            | 15610/15906 |
| ENST00000399598 | Transcript | intron_variant                 | -/5068      |
| ENST00000314032 | Transcript | intron_variant                 | -/2623      |
| ENST00000592666 | Transcript | 5_prime_UTR_variant,non_coding | 2487/4308   |
| ENST00000276893 | Transcript | intron_variant                 | -/3452      |
| ENST00000301831 | Transcript | 3_prime_UTR_variant,intron_v   | -/4613      |
| ENST00000408989 | Transcript | intron_variant                 | -/5262      |
| ENST00000408989 | Transcript | missense_variant               | 4006/5262   |
| ENST00000408989 | Transcript | 3_prime_UTR_variant,intron_v   | -/5262      |
| ENST00000268876 | Transcript | intron_variant                 | -/5679      |
| ENST00000389221 | Transcript | intron_variant                 | -/5078      |
|                 |            | intergenic_variant             |             |
| ENST00000326010 | Transcript | synonymous_variant             | 1301/2290   |
| ENST00000373383 | Transcript | intron_variant                 | -/2186      |
| ENST00000307340 | Transcript | missense_variant               | 7262/18883  |
| ENST00000252597 | Transcript | synonymous_variant             | 1782/3335   |

VEP annotated somatic variants

|                 |            |                                   |                |
|-----------------|------------|-----------------------------------|----------------|
| ENST00000219473 | Transcript | 5p_gained,frameshift_variant      | 1608-1609/3009 |
| ENST00000218348 | Transcript | synonymous_variant                | 600/3289       |
| ENST00000215794 | Transcript | intron_variant                    | -/2129         |
| ENST00000315480 | Transcript | intron_variant                    | -/4458         |
| ENST00000261497 | Transcript | 3_prime_UTR_variant               | 1853-1854/5216 |
| ENST00000398571 | Transcript | intron_variant                    | -/11357        |
| ENST00000296792 | Transcript | intron_variant                    | -/3687         |
| ENST00000261637 | Transcript | intron_variant                    | -/9025         |
| ENST00000261637 | Transcript | intron_variant                    | -/9025         |
| ENST00000331397 | Transcript | intron_variant                    | -/6529         |
| ENST00000544301 | Transcript | intron_variant                    | -/2128         |
| ENST00000262178 | Transcript | missense_variant                  | 1435/3944      |
| ENST00000435505 | Transcript | intron_variant                    | -/2446         |
| ENST00000554659 | Transcript | synonymous_variant                | 1011/5351      |
| ENST00000423497 | Transcript | downstream_gene_variant           | -/1219         |
| ENST00000423497 | Transcript | intron_variant                    | -/1219         |
| ENST00000297873 | Transcript | missense_variant                  | 696/941        |
| ENST00000325239 | Transcript | intron_variant                    | -/9962         |
| ENST00000263461 | Transcript | intron_variant                    | -/4732         |
| ENST00000263461 | Transcript | synonymous_variant                | 1080/4732      |
| ENST00000263461 | Transcript | intron_variant                    | -/4732         |
| ENST00000263461 | Transcript | synonymous_variant                | 3204/4732      |
| ENST00000263461 | Transcript | intron_variant                    | -/4732         |
| ENST00000280190 | Transcript | intron_variant                    | -/4705         |
| ENST00000414423 | Transcript | intron_variant                    | -/6872         |
| ENST00000407426 | Transcript | intron_variant                    | -/3533         |
| ENST00000302313 | Transcript | intron_variant                    | -/3707         |
| ENST00000407559 | Transcript | intron_variant                    | -/3769         |
| ENST00000303868 | Transcript | inframe_deletion                  | 7010-7027/8847 |
| ENST00000354475 | Transcript | intron_variant                    | -/4588         |
| ENST00000288828 | Transcript | intron_variant                    | -/4476         |
| ENST00000315939 | Transcript | missense_variant                  | 1064/10452     |
| ENST00000369684 | Transcript | synonymous_variant                | 1655/3818      |
| ENST00000343737 | Transcript | missense_variant                  | 160/2112       |
| ENST00000380773 | Transcript | intron_variant                    | -/2670         |
| ENST00000315436 | Transcript | intron_variant                    | -/2646         |
| ENST00000521089 | Transcript | intron_variant                    | -/3562         |
| ENST00000359154 | Transcript | synonymous_variant                | 2595/4515      |
| ENST00000358368 | Transcript | intron_variant                    | -/2667         |
| ENST00000373884 | Transcript | 3_prime_UTR_variant               | 1803/2692      |
| ENST00000502935 | Transcript | intron_variant                    | -/2539         |
| ENST00000357137 | Transcript | intron_variant                    | -/7988         |
| ENST00000265351 | Transcript | region_variant,synonymous_variant | 2890/5360      |
| ENST00000262887 | Transcript | synonymous_variant                | 1166/2802      |
| ENST00000262887 | Transcript | intron_variant                    | -/2802         |
| ENST00000007699 | Transcript | intron_variant                    | -/1590         |
| ENST00000368339 | Transcript | intron_variant                    | -/2874         |
| ENST00000368339 | Transcript | synonymous_variant                | 176/2874       |
| ENST00000325144 | Transcript | synonymous_variant                | 1437/3090      |
| ENST00000237275 | Transcript | intron_variant                    | -/992          |
| ENST00000409806 | Transcript | intron_variant                    | -/1930         |
| ENST00000409806 | Transcript | intron_variant                    | -/1930         |
| ENST00000409806 | Transcript | 5_prime_UTR_variant               | 307/1930       |
| ENST00000262577 | Transcript | intron_variant                    | -/3280         |
| ENST00000352645 | Transcript | intron_variant                    | -/5909         |

VEP annotated somatic variants

|                 |            |                           |            |
|-----------------|------------|---------------------------|------------|
| ENST00000537356 | Transcript | synonymous_variant        | 2035/2907  |
| ENST00000393760 | Transcript | missense_variant          | 570/1959   |
| ENST00000369405 | Transcript | synonymous_variant        | 1042/2170  |
| ENST00000564466 | Transcript | intron_variant            | -/1488     |
| ENST00000316495 | Transcript | intron_variant            | -/860      |
| ENST00000419474 | Transcript | missense_variant          | 4990/9180  |
| ENST00000407775 | Transcript | intron_variant            | -/4700     |
| ENST00000355341 | Transcript | 3_prime_UTR_variant       | 1978/2260  |
| ENST00000394170 | Transcript | intron_variant            | -/4344     |
| ENST00000231749 | Transcript | intron_variant            | -/2896     |
| ENST00000231749 | Transcript | intron_variant            | -/2896     |
| ENST00000535861 | Transcript | intron_variant            | -/4421     |
| ENST00000370251 | Transcript | region_variant,synonymous | 1146/6320  |
| ENST00000391705 | Transcript | missense_variant          | 646/4313   |
| ENST00000536459 | Transcript | intron_variant            | -/3795     |
| ENST00000410046 | Transcript | intron_variant            | -/3379     |
| ENST00000393927 | Transcript | intron_variant            | -/1400     |
| ENST00000337995 | Transcript | intron_variant            | -/3535     |
| ENST00000594154 | Transcript | synonymous_variant        | 1569/4513  |
| ENST00000357901 | Transcript | intron_variant            | -/4356     |
| ENST00000339249 | Transcript | intron_variant            | -/3773     |
| ENST00000392288 | Transcript | intron_variant            | -/5023     |
| ENST00000450537 | Transcript | intron_variant            | -/5926     |
| ENST00000299927 | Transcript | missense_variant          | 2799/7861  |
| ENST00000431526 | Transcript | missense_variant          | 1373/3195  |
| ENST00000270649 | Transcript | missense_variant          | 748/4818   |
| ENST00000601440 | Transcript | 5_prime_UTR_variant       | 59-60/5963 |
| ENST00000397121 | Transcript | missense_variant          | 398/2944   |
| ENST00000421812 | Transcript | synonymous_variant        | 405/5041   |
| ENST00000356929 | Transcript | missense_variant          | 535/4004   |
| ENST00000422325 | Transcript | intron_variant            | -/3068     |
| ENST00000370766 | Transcript | synonymous_variant        | 4144/5592  |
| ENST00000395216 | Transcript | missense_variant          | 738/3282   |
| ENST00000357666 | Transcript | synonymous_variant        | 1552/2697  |
| ENST00000442396 | Transcript | synonymous_variant        | 2613/2987  |
| ENST00000278853 | Transcript | missense_variant          | 473/1954   |
| ENST00000448803 | Transcript | intron_variant            | -/3813     |
| ENST00000254323 | Transcript | intron_variant            | -/4339     |
| ENST00000381638 | Transcript | intron_variant            | -/11456    |

VEP annotated somatic variants

| CDS_position | Protein_position | Amino_acids | Codons  |
|--------------|------------------|-------------|---------|
| -/1206       | -/401            |             |         |
| -/681        | -/226            |             |         |
| -/2781       | -/926            |             |         |
| 783/4632     | 261/1543         | Y           | taT/taC |
| -/5115       | -/1704           |             |         |
| -/4854       | -/1617           |             |         |
| -/4854       | -/1617           |             |         |
| -/4875       | -/1624           |             |         |
| 4038/4596    | 1346/1531        | S           | tcT/tcA |
| -/4512       | -/1503           |             |         |
| 3819/4746    | 1273/1581        | R           | agG/agA |
| -/1230       | -/409            |             |         |
| -/2580       | -/859            |             |         |
| 340/756      | 114/251          | A/T         | Gcc/Acc |
| -/1248       | -/415            |             |         |
| -/1278       | -/425            |             |         |
| -/1299       | -/432            |             |         |
| -/1587       | -/528            |             |         |
| -/795        | -/264            |             |         |
| -/1272       | -/423            |             |         |
| -/1443       | -/480            |             |         |
| -/2175       | -/724            |             |         |
| -/1731       | -/576            |             |         |
| -/1743       | -/580            |             |         |
| -/1539       | -/512            |             |         |
| 2305/2592    | 769/863          | P/S         | Ccc/Tcc |
| -/2475       | -/824            |             |         |
| 2818/3681    | 940/1226         | L/M         | Ctg/Atg |
| -/3636       | -/1211           |             |         |
| -/5733       | -/1910           |             |         |
| -/2514       | -/837            |             |         |
| -/3354       | -/1117           |             |         |
| -/5289       | -/1762           |             |         |
| -/981        | -/326            |             |         |
| -/1044       | -/347            |             |         |
| 621/2457     | 207/818          | K           | aaA/aaG |
| -/3657       | -/1218           |             |         |
| -/3936       | -/1311           |             |         |
| -/2736       | -/911            |             |         |
| -/2763       | -/920            |             |         |
| 573/1080     | 191/359          | L           | ctC/ctT |
| -/3591       | -/1196           |             |         |
| -/309        | -/102            |             |         |
| 48/717       | 16/238           | S           | tcT/tcC |
| -/2364       | -/787            |             |         |
| -/2364       | -/787            |             |         |
| 286/1155     | 96/384           | V/I         | Gtc/Atc |
| 588/1638     | 196/545          | S           | tcC/tcT |
| -/1638       | -/545            |             |         |
| -/11724      | -/3907           |             |         |
| -/11724      | -/3907           |             |         |
| -/951        | -/316            |             |         |
| -/1830       | -/609            |             |         |

TMP\_

VEP annotated somatic variants

|           |           |     |          |
|-----------|-----------|-----|----------|
| -/2409    | -/802     |     |          |
| -/1539    | -/512     |     |          |
| -/2025    | -/674     |     |          |
| -/5724    | -/1907    |     |          |
| -/5724    | -/1907    |     |          |
| -/1185    | -/394     |     |          |
| -/1185    | -/394     |     |          |
| 4341/5835 | 1447/1944 | P   | ccG/ccA  |
| -/5694    | -/1897    |     |          |
| -/4305    | -/1434    |     |          |
| -/2298    | -/765     |     |          |
| -/2817    | -/938     |     |          |
| 3025/3036 | 1009/1011 | F/L | Ttt/Ctt  |
| -/5133    | -/1710    |     |          |
| -/3162    | -/1053    |     | rs763064 |
| 804/3006  | 268/1001  | Q   | caG/caA  |
| -/3231    | -/1076    |     |          |
| -/1845    | -/614     |     |          |
| -/4017    | -/1338    |     |          |
| -/114     | -/37      |     |          |
| -/2850    | -/949     |     |          |
| -/2934    | -/977     |     |          |
| -/3414    | -/1137    |     |          |
| 1066/3414 | 356/1137  | G/R | Gga/Aga  |
| -/2001    | -/666     |     |          |
| -/807     | -/268     |     |          |
| 83/888    | 28/295    | L/R | cTg/cGg  |
| -/888     | -/295     |     |          |
| -/972     | -/323     |     |          |
| 1918/2973 | 640/990   | V/F | Gtt/Ttt  |
| -/546     | -/181     |     |          |
| 2050/2361 | 684/786   | M/V | Atg/Gtg  |
| -/1554    | -/517     |     |          |
| -/1644    | -/547     |     |          |
| 1806/2961 | 602/986   | E   | gaG/gaA  |
| -/4689    | -/1562    |     |          |
| -/2130    | -/709     |     |          |
| -/2961    | -/986     |     |          |
| 1099/1677 | 367/558   | L/V | Ttg/Gtg  |
| 543/2412  | 181/803   | D   | gaT/gaC  |
| -/1239    | -/412     |     |          |
| 492/540   | 164/179   | G   | ggG/ggA  |
| -/1980    | -/659     |     |          |
| -/6873    | -/2290    |     |          |
| 250/6873  | 84/2290   | R/G | Agg/Ggg  |
| -/6873    | -/2290    |     |          |
| 6009/6873 | 2003/2290 | H   | caC/caT  |
| -/1293    | -/430     |     |          |
| -/1224    | -/407     |     |          |
| -/1224    | -/407     |     |          |
| 585/1530  | 195/509   | W/C | tgG/tgT  |
| -/2889    | -/962     |     |          |
| -/1404    | -/467     |     |          |
| -/1764    | -/587     |     |          |
| -/1281    | -/426     |     |          |



VEP annotated somatic variants

|           |          |     |         |    |
|-----------|----------|-----|---------|----|
| -/1266    | -/421    |     |         |    |
| -/1944    | -/647    |     |         |    |
| -/1944    | -/647    |     |         |    |
| -/1296    | -/431    |     |         |    |
| -/1296    | -/431    |     |         |    |
| -/3867    | -/1288   |     |         |    |
| -/6747    | -/2248   |     |         |    |
| -/1428    | -/475    |     |         |    |
| -/1377    | -/458    |     |         |    |
| -/1677    | -/558    |     |         |    |
| -/3405    | -/1134   |     |         |    |
| 1005/3543 | 335/1180 | A   | gcC/gcT | rs |
| 2259/3063 | 753/1020 | A   | gcC/gcT |    |
| -/3090    | -/1029   |     |         |    |
| -/2841    | -/946    |     |         |    |
| -/897     | -/298    |     |         |    |
| -/4503    | -/1500   |     |         |    |
| -/3756    | -/1251   |     |         |    |
| -/3144    | -/1047   |     |         |    |
| -/3144    | -/1047   |     |         |    |
| -/2376    | -/791    |     |         |    |
| -/3294    | -/1097   |     |         |    |
| -/987     | -/328    |     |         |    |
| -/1002    | -/333    |     |         |    |
| 1564/3039 | 522/1012 | I/L | Atc/Ctc |    |
| -/2589    | -/862    |     |         |    |
| 983/1119  | 328/372  | R/H | cGc/cAc |    |
| -/1659    | -/552    |     |         |    |
| -/3564    | -/1187   |     |         |    |
| 1157/2133 | 386/710  | R/Q | cGg/cAg |    |
| -/1338    | -/445    |     |         |    |
| -/609     | -/202    |     |         |    |
| -/5136    | -/1711   |     |         |    |
| -/1815    | -/604    |     |         |    |
| 2764/2928 | 922/975  |     |         |    |
| -/1371    | -/456    |     |         |    |
| 308/1179  | 103/392  | N/S | aAt/aGt |    |
| -/2985    | -/994    |     |         |    |
| -/1377    | -/458    |     |         |    |
| -/8763    | -/2920   |     |         |    |
| -/5655    | -/1884   |     |         |    |
| -/5655    | -/1884   |     |         |    |
| -/5655    | -/1884   |     |         |    |
| -/10257   | -/3418   |     |         |    |
| -/1794    | -/597    |     |         |    |
| 864/6963  | 288/2320 | Y   | taC/taT |    |
| -/1344    | -/447    |     |         |    |
| -/1158    | -/385    |     |         |    |
| -/1158    | -/385    |     |         |    |
| -/1521    | -/506    |     |         |    |
| 992/1521  | 331/506  | G/D | gGc/gAc |    |
| -/1137    | -/378    |     |         |    |
| -/516     | -/171    |     |         |    |
| 993/1608  | 331/535  | T   | acG/acT |    |
| -/5574    | -/1857   |     |         |    |

VEP annotated somatic variants

|             |             |       |             |
|-------------|-------------|-------|-------------|
| -/402       | -/133       |       |             |
| 4272/4308   | 1424/1435   | D     | gaT/gaC     |
| -/2100      | -/699       |       |             |
| -/1014      | -/337       |       |             |
| 164/618     | 55/205      | Q/R   | cAg/cGg     |
| -/9291      | -/3096      |       |             |
| 549-550/738 | 183-184/245 | TM/TX | acTAtg/actg |
| -/903       | -/300       |       |             |
| -/573       | -/190       |       |             |
| -/1944      | -/647       |       |             |
| 1112/1362   | 371/453     | H/R   | cAc/cGc     |
| -/321       | -/106       |       |             |
| 393/957     | 131/318     | D/E   | gaT/gaA     |
| 1734/2856   | 578/951     | T     | acA/acG     |
| -/1203      | -/400       |       |             |
| -/2187      | -/728       |       |             |
| -/4593      | -/1530      |       |             |
| -/846       | -/281       |       |             |
| -/1344      | -/447       |       |             |
| -/1767      | -/588       |       |             |
| -/4992      | -/1663      |       |             |
| -/1245      | -/414       |       |             |
| -/5031      | -/1676      |       |             |
| -/5031      | -/1676      |       |             |
| -/423       | -/140       |       |             |
| -/2532      | -/843       |       |             |
| -/987       | -/328       |       |             |
| 645/918     | 215/305     | F     | ttC/ttT     |
| 2446/6663   | 816/2220    | L/F   | Ctt/Ttt     |
| -/7521      | -/2506      |       |             |
| -/7020      | -/2339      |       |             |
| -/6561      | -/2186      |       |             |
| -/3453      | -/1150      |       |             |
| -/3453      | -/1150      |       |             |
| -/1983      | -/660       |       |             |
| -/2520      | -/839       |       |             |
| -/2382      | -/793       |       |             |
| -/1254      | -/417       |       |             |
| -/1158      | -/385       |       |             |
| -/1500      | -/499       |       |             |
| -/972       | -/323       |       |             |
| 849/3831    | 283/1276    | C     | tgC/tgT     |
| -/2220      | -/739       |       |             |
| -/2073      | -/690       |       |             |
| -/570       | -/189       |       |             |
| -/3099      | -/1032      |       |             |
| -/1614      | -/537       |       |             |
| -/729       | -/242       |       |             |
| -/1191      | -/396       |       |             |
| -/5280      | -/1759      |       |             |
| -/3480      | -/1159      |       |             |
| 27/456      | 9/151       | L     | ctC/ctT     |
| 1293/1653   | 431/550     | Q     | caG/caA     |
| -/1029      | -/342       |       |             |
| 733/1500    | 245/499     | V/M   | Gtg/Atg     |

VEP annotated somatic variants

|             |             |              |                  |
|-------------|-------------|--------------|------------------|
| -/1545      | -/514       |              |                  |
| -/1986      | -/661       |              |                  |
| -/2895      | -/964       |              |                  |
| -/870       | -/289       |              |                  |
| 570/2619    | 190/872     | K            | aaA/aaG          |
| 2024/3342   | 675/1113    | E/V          | gAg/gTg          |
| -/1509      | -/502       |              |                  |
| -/4527      | -/1508      |              |                  |
| 156/2256    | 52/751      | C            | tgC/tgT          |
| -/1425      | -/474       |              |                  |
| -/1959      | -/652       |              |                  |
| -/297       | -/98        |              |                  |
| -/1125      | -/374       |              |                  |
| 2390/4338   | 797/1445    | N/S          | aAt/aGt          |
| 608/816     | 203/271     | H/X          | cAc/cc           |
| -/1113      | -/370       |              |                  |
| -/900       | -/299       |              |                  |
| 776/1533    | 259/510     | K/T          | aAa/aCa          |
| -/1200      | -/399       |              |                  |
| 515-541/723 | 172-181/240 | DPPAASALPA/A | AGCAGCCTCTGCCCTC |
| -/1794      | -/597       |              |                  |
| -/4656      | -/1551      |              |                  |
| -/1797      | -/598       |              |                  |
| 1574/2511   | 525/836     | Q/R          | cAa/cGa          |
| -/2373      | -/790       |              |                  |
| -/1509      | -/502       |              |                  |
| -/918       | -/305       |              |                  |
| -/1041      | -/346       |              |                  |
| 1227/1740   | 409/579     | P            | ccA/ccG          |
| -/3093      | -/1030      |              |                  |
| -/1338      | -/445       |              |                  |
| -/1590      | -/529       |              |                  |
| -/1590      | -/529       |              |                  |
| -/882       | -/293       |              |                  |
| -/759       | -/252       |              |                  |
| -/1536      | -/511       |              |                  |
| -/4332      | -/1443      |              |                  |
| 755/4332    | 252/1443    | R/H          | cGt/cAt          |
| -/1272      | -/423       |              |                  |
| 552/1737    | 184/578     | R            | agA/agG          |
| -/2271      | -/756       |              |                  |
| 83/267      | 28/88       | R/L          | cGa/cTa          |
| -/7329      | -/2442      |              |                  |
| -/7329      | -/2442      |              |                  |
| -/2112      | -/703       |              |                  |
| -/2112      | -/703       |              |                  |
| 404/1794    | 135/597     | S/N          | aGt/aAt          |
| -/2466      | -/821       |              |                  |
| -/1788      | -/595       |              |                  |
| -/1872      | -/623       |              |                  |
| 1204/3696   | 402/1231    | H/Y          | Cat/Tat          |
| 4389/4443   | 1463/1480   | Q            | caG/caA          |
| -/498       | -/165       |              |                  |
| 39/2694     | 13/897      | A            | gcG/gcC          |
| -/1995      | -/664       |              |                  |

VEP annotated somatic variants

|           |           |     |         |
|-----------|-----------|-----|---------|
| -/1995    | -/664     |     |         |
| 545/1173  | 182/390   | A/V | gCg/gTg |
| -/1506    | -/501     |     |         |
| -/1131    | -/376     |     |         |
| -/3393    | -/1130    |     |         |
| 633/684   | 211/227   | S   | agC/agT |
| -/6210    | -/2069    |     |         |
| 366/660   | 122/219   | H/Q | caC/caG |
| -/1260    | -/419     |     |         |
| -/2610    | -/869     |     |         |
| -/2064    | -/687     |     |         |
| -/687     | -/228     |     |         |
| -/660     | -/219     |     |         |
| -/744     | -/247     |     |         |
| 309/762   | 103/253   |     |         |
| -/4317    | -/1438    |     |         |
| -/2118    | -/705     |     |         |
| -/3105    | -/1034    |     |         |
| -/2856    | -/951     |     |         |
| 4716/7131 | 1572/2376 | Y   | taC/taT |
| -/1533    | -/510     |     |         |
| 1359/1419 | 453/472   | T   | acG/acA |
| -/3081    | -/1026    |     |         |
| -/3996    | -/1331    |     |         |
| -/3996    | -/1331    |     |         |
| -/6978    | -/2325    |     |         |
| 3525/3786 | 1175/1261 | E   | gaG/gaA |
| -/2370    | -/789     |     |         |
| -/2583    | -/860     |     |         |
| -/4494    | -/1497    |     |         |
| -/1623    | -/540     |     |         |
| -/5145    | -/1714    |     |         |
| -/5145    | -/1714    |     |         |
| 1240/1323 | 414/440   | A/T | Gcc/Acc |
| -/5076    | -/1691    |     |         |
| -/5238    | -/1745    |     |         |
| -/3087    | -/1028    |     |         |
| -/9534    | -/3177    |     |         |
| 408/816   | 136/271   | L   | ctC/ctG |
| -/357     | -/118     |     |         |
| -/3198    | -/1065    |     |         |
| -/1686    | -/561     |     |         |
| -/2190    | -/729     |     |         |
| 3154/3279 | 1052/1092 | I/V | Att/Gtt |
| -/3858    | -/1285    |     |         |
| -/1317    | -/438     |     |         |
| -/3111    | -/1036    |     |         |
| -/3111    | -/1036    |     |         |
| 777/807   | 259/268   | A   | gcC/gcA |
| -/2547    | -/848     |     |         |
| -/1860    | -/619     |     |         |
| -/3069    | -/1022    |     |         |
| -/4094    | -/1364    |     |         |
| -/237     | -/78      |     |         |
| -/1176    | -/391     |     |         |

VEP annotated somatic variants

|            |           |     |         |
|------------|-----------|-----|---------|
| 3912/6969  | 1304/2322 | P   | ccT/ccC |
| -/2103     | -/700     |     |         |
| 4488/7474  | 1496/2491 | P   | ccG/ccA |
| -/2688     | -/895     |     |         |
| 423/2205   | 141/734   | V   | gtG/gtA |
| 1911/10872 | 637/3623  | L   | ctC/ctT |
| -/2295     | -/764     |     |         |
| 4715/5349  | 1572/1782 | L/P | cTg/cCg |
| -/4551     | -/1516    |     |         |
| 2932/4551  | 978/1516  | G/R | Ggg/Agg |
| -/2727     | -/908     |     |         |
| 2403/2727  | 801/908   | A   | gcG/gcA |
| 1327/2685  | 443/894   | H/Y | Cac/Tac |
| -/1248     | -/415     |     |         |
| -/780      | -/259     |     |         |
| -/831      | -/276     |     |         |
| -/1485     | -/494     |     |         |
| -/1485     | -/494     |     |         |
| -/1512     | -/503     |     |         |
| 38/1575    | 13/524    | P/L | cCg/cTg |
| -/1530     | -/509     |     |         |
| 63/3129    | 21/1042   | P   | ccG/ccA |
| -/1506     | -/501     |     |         |
| -/1635     | -/544     |     |         |
| -/1803     | -/600     |     |         |
| 234/1803   | 78/600    | H   | caT/caC |
| -/1803     | -/600     |     |         |
| -/4344     | -/1447    |     |         |
| 1017/1431  | 339/476   | V   | gtC/gtT |
| -/4110     | -/1369    |     |         |
| 348/570    | 116/189   | V   | gtT/gtC |
| -/2913     | -/970     |     |         |
| -/2913     | -/970     |     |         |
| -/1860     | -/619     |     |         |
| -/3030     | -/1009    |     |         |
| 670/3864   | 224/1287  | E/Q | Gag/Cag |
| -/1590     | -/529     |     |         |
| -/1653     | -/550     |     |         |
| -/2415     | -/804     |     |         |
| -/909      | -/302     |     |         |
| -/2232     | -/743     |     |         |
| -/3474     | -/1157    |     |         |
| -/3663     | -/1220    |     |         |
| -/3663     | -/1220    |     |         |
| -/3663     | -/1220    |     |         |
| -/3819     | -/1272    |     |         |
| -/4731     | -/1576    |     |         |
| -/3165     | -/1054    |     |         |
| -/2037     | -/678     |     |         |
| -/2268     | -/755     |     |         |
| -/675      | -/224     |     |         |
| -/2928     | -/975     |     |         |
| -/2454     | -/817     |     |         |
| -/5760     | -/1919    |     |         |
| -/1152     | -/383     |     |         |

r

VEP annotated somatic variants

|           |           |     |         |
|-----------|-----------|-----|---------|
| -/1431    | -/476     |     |         |
| -/3441    | -/1146    |     |         |
| -/13572   | -/4523    |     |         |
| -/9279    | -/3092    |     |         |
| -/13548   | -/4515    |     |         |
| -/13548   | -/4515    |     |         |
| -/13548   | -/4515    |     |         |
| -/13548   | -/4515    |     |         |
| -/13548   | -/4515    |     |         |
| -/13458   | -/4485    |     |         |
| -/13473   | -/4490    |     |         |
| -/13461   | -/4486    |     |         |
| -/843     | -/280     |     |         |
| -/1086    | -/361     |     |         |
| -/4734    | -/1577    |     |         |
| -/5493    | -/1830    |     |         |
| -/6093    | -/2030    |     |         |
| 3438/4614 | 1146/1537 | P   | ccG/ccA |
| 1051/1236 | 351/411   | E/Q | Gag/Cag |
| -/1245    | -/414     |     |         |
| -/858     | -/285     |     |         |
| -/2277    | -/758     |     |         |
| -/1050    | -/349     |     |         |
| -/2874    | -/957     |     |         |
| -/2874    | -/957     |     |         |
| -/2874    | -/957     |     |         |
| -/6342    | -/2113    |     |         |
| -/3000    | -/999     |     |         |
| 3123/3180 | 1041/1059 | P   | ccC/ccA |
| 30/3180   | 10/1059   | C   | tgC/tgT |
| -/8616    | -/2871    |     |         |
| -/15516   | -/5171    |     |         |
| -/507     | -/168     |     |         |
| -/1056    | -/351     |     |         |
| -/897     | -/298     |     |         |
| 279/1869  | 93/622    | R   | cgG/cgA |
| -/567     | -/188     |     |         |
| 430/1146  | 144/381   | S/A | Tcc/Gcc |
| -/1938    | -/645     |     |         |
| -/12945   | -/4314    |     |         |
| -/1086    | -/361     |     |         |
| 77/693    | 26/230    | R/L | cGc/cTc |
| 1022/2313 | 341/770   | T/I | aCc/aTc |
| -/2328    | -/775     |     |         |
| -/2745    | -/914     |     |         |
| -/2715    | -/904     |     |         |
| -/2799    | -/932     |     |         |
| -/639     | -/212     |     |         |
| -/1599    | -/532     |     |         |
| -/4236    | -/1411    |     |         |
| -/1392    | -/463     |     |         |
| -/525     | -/174     |     |         |
| -/2922    | -/973     |     |         |
| -/1473    | -/490     |     |         |
| -/2196    | -/731     |     |         |

VEP annotated somatic variants

|           |           |     |         |
|-----------|-----------|-----|---------|
| 372/2502  | 124/833   | R   | cgG/cgA |
| -/3363    | -/1120    |     |         |
| -/2919    | -/972     |     |         |
| 99/1419   | 33/472    | H   | caC/caT |
| 1509/1992 | 503/663   | T   | acG/acA |
| 417/2463  | 139/820   | I   | atC/atT |
| 1509/2463 | 503/820   | I   | atC/atA |
| 1218/2463 | 406/820   | F   | ttT/ttC |
| -/2175    | -/724     |     |         |
| -/891     | -/296     |     |         |
| 1034/2982 | 345/993   | S/T | aGt/aCt |
| -/894     | -/297     |     |         |
| -/894     | -/297     |     |         |
| 1723/2505 | 575/834   | S/P | Tct/Cct |
| -/2505    | -/834     |     |         |
| -/2505    | -/834     |     |         |
| 489/1179  | 163/392   | A   | gcG/gcA |
| -/1977    | -/658     |     |         |
| -/1932    | -/643     |     |         |
| -/1569    | -/522     |     |         |
| -/1287    | -/428     |     |         |
| -/9372    | -/3123    |     |         |
| -/3066    | -/1021    |     |         |
| 416/1368  | 139/455   | H/R | cAt/cGt |
| 1236/1668 | 412/555   | S   | agC/agT |
| -/2934    | -/977     |     |         |
| -/6363    | -/2120    |     |         |
| 1768/2661 | 590/886   | G/R | Ggg/Agg |
| 512/1002  | 171/333   | T/I | aCa/aTa |
| 734/1041  | 245/346   | T/M | aCg/aTg |
| 6/765     | 2/254     | A   | gcG/gcA |
| -/2433    | -/810     |     |         |
| -/2418    | -/805     |     |         |
| -/2418    | -/805     |     |         |
| -/6102    | -/2033    |     |         |
| 3150/6102 | 1050/2033 | S   | tcG/tcA |
| -/1866    | -/621     |     |         |
| 1765/2541 | 589/846   | E/K | Gag/Aag |
| -/2685    | -/894     |     |         |
| -/1761    | -/586     |     |         |
| 3780/7056 | 1260/2351 | D/E | gaC/gaG |
| -/7056    | -/2351    |     |         |
| 1120/1386 | 374/461   | V/I | Gtt/Att |
| -/1599    | -/532     |     |         |
| -/1335    | -/444     |     |         |
| -/1338    | -/445     |     |         |
| -/1260    | -/419     |     |         |
| 716/1074  | 239/357   | R/H | cGt/cAt |
| -/588     | -/195     |     |         |
| -/588     | -/195     |     |         |
| -/342     | -/113     |     |         |
| -/342     | -/113     |     |         |
| -/4221    | -/1406    |     |         |
| 348/489   | 116/162   | L   | ctC/ctT |
| -/708     | -/235     |     |         |

VEP annotated somatic variants

|              |            |      |          |      |
|--------------|------------|------|----------|------|
| -/1281       | -/426      |      |          |      |
| -/3183       | -/1060     |      |          |      |
| -/7056       | -/2351     |      |          |      |
| -/1110       | -/369      |      |          |      |
| -/2007       | -/668      |      |          |      |
| -/3963       | -/1320     |      |          |      |
| -/1554       | -/517      |      |          |      |
| 3000/3207    | 1000/1068  | A    | gcT/gcC  |      |
| 560/1359     | 187/452    | A/V  | gCt/gTt  |      |
| -/4368       | -/1455     |      |          |      |
| -/1611       | -/536      |      |          |      |
| -/1611       | -/536      |      |          |      |
| 387/1611     | 129/536    | P    | ccA/ccC  | rs3E |
| -/1548       | -/515      |      |          |      |
| -/3165       | -/1054     |      |          |      |
| -/3165       | -/1054     |      |          |      |
| 3651/7536    | 1217/2511  | G    | ggC/ggT  |      |
| -/7536       | -/2511     |      |          |      |
| -/7536       | -/2511     |      |          |      |
| -/7536       | -/2511     |      |          |      |
| 464/3696     | 155/1231   | P/L  | cCg/cTg  |      |
| 5896/8430    | 1966/2809  | H/D  | Cac/Gac  |      |
| -/3138       | -/1045     |      |          |      |
| -/2871       | -/956      |      |          |      |
| -/2871       | -/956      |      |          |      |
| -/837        | -/278      |      |          |      |
| -/1395       | -/464      |      |          |      |
| -/1239       | -/412      |      |          |      |
| -/1734       | -/577      |      |          |      |
| 1152/2676    | 384/891    | A    | gcG/gcA  |      |
| 1162/2409    | 388/802    | G/R  | Ggg/Agg  |      |
| -/1362       | -/453      |      |          |      |
| -/4320       | -/1439     |      |          |      |
| 2952/4320    | 984/1439   | N    | aaC/aaT  |      |
| -/4320       | -/1439     |      |          |      |
| -/2280       | -/759      |      |          |      |
| -/1785       | -/594      |      |          |      |
| 594/984      | 198/327    | L    | ctG/ctA  |      |
| -/669        | -/222      |      |          |      |
| 1286/7944    | 429/2647   | T/M  | aCg/aTg  |      |
| -/7902       | -/2633     |      |          |      |
| -/4092       | -/1363     |      |          |      |
| -/5169       | -/1722     |      |          |      |
| -/5169       | -/1722     |      |          |      |
| 441/1599     | 147/532    | S    | tcC/tcT  |      |
| 172-177/3054 | 58-59/1017 | TT/- | ACCACC/- |      |
| -/3054       | -/1017     |      |          |      |
| -/5685       | -/1894     |      |          |      |
| 2091/5685    | 697/1894   | A    | gcC/gcG  |      |
| 1284/1335    | 428/444    | Y    | taT/taC  |      |
| -/2043       | -/680      |      |          |      |
| -/1764       | -/587      |      |          |      |
| 1947/12039   | 649/4012   | H    | caT/caC  |      |
| -/12039      | -/4012     |      |          |      |



VEP annotated somatic variants

|            |           |     |         |
|------------|-----------|-----|---------|
| 8439/12039 | 2813/4012 | D   | gaC/gaT |
| -/12039    | -/4012    |     |         |
| -/12039    | -/4012    |     |         |
| 3987/6420  | 1329/2139 | I   | atC/atA |
| -/3120     | -/1039    |     |         |
| -/1746     | -/581     |     |         |
| -/2544     | -/847     |     |         |
| 1587/1719  | 529/572   | H   | caC/caT |
| -/1098     | -/365     |     |         |
| -/1080     | -/359     |     |         |
| -/201      | -/66      |     |         |
| -/4437     | -/1478    |     |         |
| -/1566     | -/521     |     |         |
| -/3936     | -/1311    |     |         |
| -/3936     | -/1311    |     |         |
| -/2058     | -/685     |     |         |
| -/2058     | -/685     |     |         |
| -/1179     | -/392     |     |         |
| -/1812     | -/603     |     |         |
| 1420/1674  | 474/557   | Q/K | Cag/Aag |
| 157/1914   | 53/637    | Y/D | Tac/Gac |
| 1543/1914  | 515/637   | V/F | Gtt/Ttt |
| 1056/2631  | 352/876   | E   | gaA/gaG |
| 1469/2631  | 490/876   | A/V | gCg/gTg |
| -/2631     | -/876     |     |         |
| -/3042     | -/1013    |     |         |
| -/1761     | -/586     |     |         |
| -/1761     | -/586     |     |         |
| 660/1761   | 220/586   | P   | ccC/ccT |
| 1095/1434  | 365/477   | F   | ttC/ttT |
| -/1209     | -/402     |     |         |
| -/1416     | -/471     |     |         |
| -/1104     | -/367     |     |         |
| -/1290     | -/429     |     |         |
| -/843      | -/280     |     |         |
| -/2256     | -/751     |     |         |
| -/2277     | -/758     |     |         |
| 1438/1959  | 480/652   | A/P | Gca/Cca |
| 1550/1959  | 517/652   | A/V | gCg/gTg |
| 1405/1593  | 469/530   | R/C | Cgc/Tgc |
| -/993      | -/330     |     |         |
| 289/591    | 97/196    | V/I | Gtc/Atc |
| 2652/3612  | 884/1203  | C   | tgC/tgT |
| -/3612     | -/1203    |     |         |
| -/1575     | -/524     |     |         |
| -/555      | -/184     |     |         |
| 253/1254   | 85/417    | I/V | Atc/Gtc |
| -/1254     | -/417     |     |         |
| -/1050     | -/349     |     |         |
| -/885      | -/294     |     |         |
| -/1548     | -/515     |     |         |
| 309/1068   | 103/355   | D   | gaC/gaT |
| 110/984    | 37/327    | R/H | cGc/cAc |
| 453/987    | 151/328   | S   | agC/agT |
| 3042/4497  | 1014/1498 | L   | ctC/ctT |

r  
rs170575

VEP annotated somatic variants

|           |          |     |         |
|-----------|----------|-----|---------|
| -/1959    | -/652    |     |         |
| 1248/1668 | 416/555  | T   | acG/acA |
| -/2523    | -/840    |     |         |
| -/987     | -/328    |     |         |
| 21/1167   | 7/388    | R   | cgG/cgT |
| 370/1527  | 124/508  | V/L | Gtg/Ttg |
| 652/3840  | 218/1279 | A/P | Gcc/Ccc |
| -/1683    | -/560    |     |         |
| -/1683    | -/560    |     |         |
| -/1683    | -/560    |     |         |
| -/1548    | -/515    |     |         |
| 1425/2217 | 475/738  | H   | caT/caC |
| -/1989    | -/662    |     |         |
| -/1737    | -/578    |     |         |
| -/1737    | -/578    |     |         |
| -/1737    | -/578    |     |         |
| -/5850    | -/1949   |     |         |
| -/2751    | -/916    |     |         |
| -/2652    | -/883    |     |         |
| -/2685    | -/894    |     |         |
| 1789/2748 | 597/915  | L   | Ctg/Ttg |
| -/3654    | -/1217   |     |         |
| 1847/2349 | 616/782  | T/M | aCg/aTg |
| -/1887    | -/628    |     |         |
| -/633     | -/210    |     |         |
| -/651     | -/216    |     |         |
| -/1905    | -/634    |     |         |
| -/1905    | -/634    |     |         |
| -/3327    | -/1108   |     |         |
| -/1332    | -/443    |     |         |
| -/1974    | -/657    |     |         |
| -/255     | -/84     |     |         |
| -/2976    | -/991    |     |         |
| -/2976    | -/991    |     |         |
| -/3210    | -/1069   |     |         |
| -/615     | -/204    |     |         |
| 525/756   | 175/251  | P   | ccG/ccA |
| -/6435    | -/2144   |     |         |
| -/6435    | -/2144   |     |         |
| 1842/6435 | 614/2144 | T   | acG/acA |
| 1895/2568 | 632/855  | V/A | gTg/gCg |
| -/7833    | -/2610   |     |         |
| -/7833    | -/2610   |     |         |
| -/2517    | -/838    |     |         |
| -/2517    | -/838    |     |         |
| -/1017    | -/338    |     |         |
| -/14586   | -/4861   |     |         |
| 187/1047  | 63/348   | H/D | Cat/Gat |
| 1008/2187 | 336/728  | E   | gaG/gaA |
| -/1515    | -/504    |     |         |
| -/2349    | -/782    |     |         |
| 39/300    | 13/99    | D   | gaC/gaT |
| -/381     | -/126    |     |         |
| -/381     | -/126    |     |         |
| -/411     | -/136    |     |         |

VEP annotated somatic variants

|            |           |     |         |
|------------|-----------|-----|---------|
| 48/312     | 16/103    | A   | gcC/gcT |
| -/2754     | -/917     |     |         |
| 619/777    | 207/258   | L/M | Ctg/Atg |
| -/2181     | -/726     |     |         |
| -/3030     | -/1009    |     |         |
| 606/1086   | 202/361   | V   | gtG/gtT |
| -/1806     | -/601     |     |         |
| 494/1806   | 165/601   | G/V | gGc/gTc |
| -/1896     | -/631     |     |         |
| -/2571     | -/856     |     |         |
| 1386/2160  | 462/719   | L   | ctG/ctA |
| -/1254     | -/417     |     |         |
| 516/2328   | 172/775   | G   | ggG/ggA |
| -/483      | -/160     |     |         |
| 12/1074    | 4/357     | P   | ccT/ccA |
| 2109/13125 | 703/4374  | S   | tcA/tcG |
| 5987/13125 | 1996/4374 | R/H | cGt/cAt |
| 382/909    | 128/302   | V/I | Gtt/Att |
| -/909      | -/302     |     |         |
| -/909      | -/302     |     |         |
| -/1359     | -/452     |     |         |
| -/1101     | -/366     |     |         |
| 536/2190   | 179/729   | S/T | aGt/aCt |
| 28/1548    | 10/515    | F/V | Ttc/Gtc |
| -/4104     | -/1367    |     |         |
| -/7476     | -/2491    |     |         |
| -/7476     | -/2491    |     |         |
| -/7476     | -/2491    |     |         |
| -/1011     | -/336     |     |         |
| 1347/4026  | 449/1341  | E   | gaA/gaG |
| 2571/4026  | 857/1341  | Y   | taT/taC |
| -/4026     | -/1341    |     |         |
| -/1296     | -/431     |     |         |
| 999/1296   | 333/431   | E/D | gaG/gaT |
| -/1296     | -/431     |     |         |
| -/3981     | -/1326    |     |         |
| -/4314     | -/1437    |     |         |
| 3069/3999  | 1023/1332 | L   | ctG/ctC |
| -/2376     | -/791     |     |         |
| 530/1662   | 177/553   | S/Y | tCc/tAc |
| -/1725     | -/574     |     |         |
| -/819      | -/272     |     |         |
| -/735      | -/244     |     |         |
| -/333      | -/110     |     |         |
| -/603      | -/200     |     |         |
| 1650/4149  | 550/1382  | A   | gcG/gcA |
| -/4149     | -/1382    |     |         |
| -/6573     | -/2190    |     |         |
| -/6573     | -/2190    |     |         |
| -/2664     | -/887     |     |         |
| -/4728     | -/1575    |     |         |
| -/4896     | -/1631    |     |         |
| -/3549     | -/1182    |     |         |
| -/1545     | -/514     |     |         |
| 957/1392   | 319/463   | V   | gtG/gtC |

VEP annotated somatic variants

|           |           |     |         |
|-----------|-----------|-----|---------|
| -/3504    | -/1167    |     |         |
| -/3504    | -/1167    |     |         |
| -/3099    | -/1032    |     |         |
| -/3108    | -/1035    |     |         |
| -/2793    | -/930     |     |         |
| 390/2793  | 130/930   | V   | gtG/gtA |
| -/2793    | -/930     |     |         |
| -/792     | -/263     |     |         |
| -/2841    | -/946     |     |         |
| -/8106    | -/2701    |     |         |
| -/8106    | -/2701    |     |         |
| -/8016    | -/2671    |     |         |
| 729/1644  | 243/547   | I   | atC/atT |
| -/5166    | -/1721    |     |         |
| -/5166    | -/1721    |     |         |
| -/2529    | -/842     |     |         |
| -/2472    | -/823     |     |         |
| -/2535    | -/844     |     |         |
| -/3741    | -/1246    |     |         |
| -/3741    | -/1246    |     |         |
| 1206/3741 | 402/1246  | P   | ccC/ccT |
| -/1575    | -/524     |     |         |
| -/4059    | -/1352    |     |         |
| -/2988    | -/995     |     |         |
| 1578/2988 | 526/995   | S   | agC/agT |
| 2781/2988 | 927/995   | H   | caC/caT |
| 234/1476  | 78/491    | L   | ctG/ctA |
| 566/1371  | 189/456   | P/R | cCg/cGg |
| -/1260    | -/419     |     |         |
| -/3450    | -/1149    |     |         |
| -/942     | -/313     |     |         |
| -/780     | -/259     |     |         |
| -/5286    | -/1761    |     |         |
| -/3195    | -/1064    |     |         |
| -/3291    | -/1096    |     |         |
| -/4620    | -/1539    |     |         |
| 2177/4206 | 726/1401  | T/K | aCg/aAg |
| -/2826    | -/941     |     |         |
| 1612/2826 | 538/941   | R   | Aga/Cga |
| 1930/2826 | 644/941   | R/S | Cgt/Agt |
| 33/1230   | 11/409    | N   | aaC/aaT |
| -/15018   | -/5005    |     |         |
| 2065/6534 | 689/2177  | S/A | Tct/Gct |
| -/5439    | -/1812    |     |         |
| 3486/4104 | 1162/1367 | A   | gcC/gcT |
| -/1557    | -/518     |     |         |
| -/4947    | -/1648    |     |         |
| 270/3090  | 90/1029   | Y   | taC/taT |
| -/2997    | -/998     |     |         |
| -/5376    | -/1791    |     |         |
| -/3312    | -/1103    |     |         |
| -/5343    | -/1780    |     |         |
| -/2379    | -/792     |     |         |
| -/1182    | -/393     |     |         |

VEP annotated somatic variants

|           |          |     |         |
|-----------|----------|-----|---------|
| 648/1443  | 216/480  | T   | acA/acC |
| 39/1794   | 13/597   | V   | gtA/gtG |
| -/1863    | -/620    |     |         |
| -/570     | -/189    |     |         |
| -/14736   | -/4911   |     |         |
| -/5250    | -/1749   |     |         |
| -/6630    | -/2209   |     |         |
| 936/1551  | 312/516  | T   | acG/acA |
| -/2631    | -/876    |     |         |
| -/1479    | -/492    |     |         |
| -/1755    | -/584    |     |         |
| -/1347    | -/448    |     |         |
| -/1404    | -/467    |     |         |
| -/879     | -/292    |     |         |
| -/291     | -/96     |     |         |
| 330/339   | 110/112  | T   | acT/acC |
| -/2118    | -/705    |     |         |
| -/9369    | -/3122   |     |         |
| -/9369    | -/3122   |     | rs7493  |
| -/5472    | -/1823   |     |         |
| -/5472    | -/1823   |     |         |
| -/4830    | -/1609   |     |         |
| -/4830    | -/1609   |     |         |
| -/4830    | -/1609   |     |         |
| -/3582    | -/1193   |     |         |
| 1446/3393 | 482/1130 | S   | tcT/tcC |
| -/285     | -/94     |     |         |
| -/459     | -/152    |     |         |
| -/819     | -/272    |     |         |
| -/2736    | -/911    |     |         |
| -/1140    | -/379    |     |         |
| -/1500    | -/499    |     |         |
| -/1944    | -/647    |     |         |
| 1277/1779 | 426/592  | R/H | cGc/cAc |
| -/1470    | -/489    |     |         |
| -/4158    | -/1385   |     |         |
| -/3078    | -/1025   |     |         |
| -/2322    | -/773    |     |         |
| 42/2280   | 14/759   | A   | gcT/gcC |
| -/2280    | -/759    |     |         |
| -/1725    | -/574    |     |         |
| -/1839    | -/612    |     |         |
| -/1500    | -/499    |     |         |
| -/13800   | -/4599   |     |         |
| -/4848    | -/1615   |     |         |
| 562/759   | 188/252  | R/W | Cgg/Tgg |
| -/759     | -/252    |     |         |
| -/1074    | -/357    |     |         |
| -/1245    | -/414    |     |         |
| 20/786    | 7/261    | G/V | gGc/gTc |
| -/3099    | -/1032   |     |         |
| -/5169    | -/1722   |     |         |
| 275/1977  | 92/658   | L/P | cTg/cCg |
| 713/1392  | 238/463  | R/Q | cGa/cAa |
| -/243     | -/80     |     |         |

VEP annotated somatic variants

|           |          |     |         |
|-----------|----------|-----|---------|
| -/2199    | -/732    |     |         |
| -/5439    | -/1812   |     |         |
| -/1041    | -/346    |     |         |
| -/741     | -/246    |     |         |
| -/684     | -/227    |     |         |
| -/2010    | -/669    |     |         |
| -/2010    | -/669    |     |         |
| -/2157    | -/718    |     |         |
| -/618     | -/205    |     |         |
| -/930     | -/309    |     |         |
| 888/945   | 296/314  | G   | ggA/ggG |
| -/1041    | -/346    |     |         |
| -/3429    | -/1142   |     |         |
| 909/1122  | 303/373  | P   | ccG/ccA |
| -/1821    | -/606    |     |         |
| -/3414    | -/1137   |     |         |
| 2193/2997 | 731/998  | C   | tgC/tgT |
| -/1962    | -/653    |     |         |
| 1245/3435 | 415/1144 | R   | cgT/cgA |
| 728/3030  | 243/1009 | Q/P | cAa/cCa |
| 2594/3180 | 865/1059 | P/L | cCc/cTc |
| 574/3942  | 192/1313 | A/T | Gct/Act |
| -/1974    | -/657    |     |         |
| 945/2502  | 315/833  | P   | ccT/ccG |
| -/3720    | -/1239   |     |         |
| -/1149    | -/382    |     |         |
| -/4713    | -/1570   |     |         |
| 1011/4713 | 337/1570 | D   | gaT/gaC |
| -/7872    | -/2623   |     |         |
| 490/1746  | 164/581  | R/S | Cgc/Agc |
| -/2178    | -/725    |     |         |
| -/5943    | -/1980   |     |         |
| 429/2868  | 143/955  | V   | gtG/gtA |
| -/16791   | -/5596   |     |         |
| -/16791   | -/5596   |     |         |
| 978/1497  | 326/498  | I   | atC/atT |
| -/4365    | -/1454   |     |         |
| -/603     | -/200    |     |         |
| -/2244    | -/747    |     |         |
| 419/666   | 140/221  | C/S | tGc/tCc |
| -/1107    | -/368    |     |         |
| -/4626    | -/1541   |     |         |
| -/2106    | -/701    |     |         |
| -/3000    | -/999    |     |         |
| -/1743    | -/580    |     |         |
| 666/1137  | 222/378  | P   | ccG/ccA |
| -/1617    | -/538    |     |         |
| 1704/2406 | 568/801  | P   | ccG/ccA |
| -/2406    | -/801    |     |         |
| 1356/2406 | 452/801  | F   | ttC/ttT |
| 343/717   | 115/238  | L/F | Ctt/Ttt |
| -/6009    | -/2002   |     |         |
| -/6009    | -/2002   |     |         |
| -/6009    | -/2002   |     |         |
| -/2004    | -/667    |     |         |

VEP annotated somatic variants

|            |            |     |         |
|------------|------------|-----|---------|
| -/3999     | -/1332     |     |         |
| -/3999     | -/1332     |     |         |
| -/879      | -/292      |     |         |
| -/3111     | -/1036     |     |         |
| -/1680     | -/559      |     |         |
| -/1710     | -/569      |     |         |
| -/1206     | -/401      |     |         |
| 460/654    | 154/217    | K/Q | Aag/Cag |
| -/2814     | -/937      |     |         |
| 1418/2814  | 473/937    | T/I | aCt/aTt |
| -/1047     | -/348      |     |         |
| -/708      | -/235      |     |         |
| -/2127     | -/708      |     |         |
| 916/3972   | 306/1323   | Y/D | Tat/Gat |
| 1853/3972  | 618/1323   | H/R | cAc/cGc |
| 1526/3972  | 509/1323   | V/A | gTg/gCg |
| -/816      | -/271      |     |         |
| -/414      | -/137      |     |         |
| -/708      | -/235      |     |         |
| -/606      | -/201      |     |         |
| -/2739     | -/912      |     |         |
| -/2805     | -/934      |     |         |
| -/882      | -/293      |     |         |
| 6909/7650  | 2303/2549  | L   | ctG/ctA |
| 3144/3798  | 1048/1265  | A   | gcA/gcG |
| -/3798     | -/1265     |     |         |
| -/3798     | -/1265     |     |         |
| -/3798     | -/1265     |     |         |
| -/2685     | -/894      |     |         |
| -/43524    | -/14507    |     |         |
| 7599/43524 | 2533/14507 | A   | gcA/gcG |
| -/10893    | -/3630     |     |         |
| -/10893    | -/3630     |     |         |
| 7662/8454  | 2554/2817  | P   | ccT/ccC |
| -/1203     | -/400      |     |         |
| 7353/8487  | 2451/2828  | T   | acT/acC |
| 123/924    | 41/307     | A   | gcC/gcT |
| -/3825     | -/1274     |     |         |
| 3721/5940  | 1241/1979  | A/T | Gca/Aca |
| -/5841     | -/1946     |     |         |
| 1095/5808  | 365/1935   | K   | aaG/aaA |
| -/5808     | -/1935     |     |         |
| -/5808     | -/1935     |     |         |
| -/5883     | -/1960     |     |         |
| 3558/5745  | 1186/1914  | T   | acC/acT |
| -/10593    | -/3530     |     |         |
| -/7704     | -/2567     |     |         |
| -/2913     | -/970      |     |         |
| -/3297     | -/1098     |     |         |
| -/5568     | -/1855     |     |         |
| -/6069     | -/2022     |     |         |
| -/675      | -/224      |     |         |
| 1134/3963  | 378/1320   | I   | atC/atT |
| -/3456     | -/1151     |     |         |
| -/2487     | -/828      |     |         |

VEP annotated somatic variants

|           |           |     |         |
|-----------|-----------|-----|---------|
| -/2178    | -/725     |     |         |
| 912/1764  | 304/587   | P   | ccG/ccA |
| -/1548    | -/515     |     |         |
| 928/1263  | 310/420   | A/T | Gct/Act |
| -/624     | -/207     |     |         |
| -/7116    | -/2371    |     |         |
| 2768/2901 | 923/966   | H/R | cAt/cGt |
| -/2901    | -/966     |     |         |
| -/2901    | -/966     |     |         |
| -/2901    | -/966     |     |         |
| 274/3966  | 92/1321   | P/S | Ccc/Tcc |
| -/4206    | -/1401    |     |         |
| -/4497    | -/1498    |     |         |
| -/2226    | -/741     |     |         |
| -/6192    | -/2063    |     |         |
| -/7323    | -/2440    |     |         |
| 1290/1392 | 430/463   | A   | gcC/gcT |
| -/25578   | -/8525    |     |         |
| -/25578   | -/8525    |     |         |
| -/25578   | -/8525    |     |         |
| 1062/1620 | 354/539   | T   | acG/acA |
| 510/519   | 170/172   | D   | gaT/gaC |
| -/519     | -/172     |     |         |
| 995/2028  | 332/675   | E/A | gAa/gCa |
| -/2910    | -/969     |     |         |
| -/2703    | -/900     |     |         |
| -/2157    | -/718     |     |         |
| 312/1188  | 104/395   | H   | caT/caC |
| -/4833    | -/1610    |     |         |
| -/3744    | -/1247    |     |         |
| -/6273    | -/2090    |     |         |
| -/1221    | -/406     |     |         |
| 637/1401  | 213/466   | R/G | Agg/Ggg |
| -/8415    | -/2804    |     |         |
| -/855     | -/284     |     |         |
| -/4515    | -/1504    |     |         |
| 185/720   | 62/239    | S/T | aGc/aCc |
| -/2547    | -/848     |     |         |
| -/3075    | -/1024    |     |         |
| -/3603    | -/1200    |     |         |
| 2955/3603 | 985/1200  | L   | ctG/ctT |
| -/3603    | -/1200    |     |         |
| -/2976    | -/991     |     |         |
| -/1551    | -/516     |     |         |
| -/3441    | -/1146    |     |         |
| -/2574    | -/857     |     |         |
| -/1785    | -/594     |     |         |
| -/1521    | -/506     |     |         |
| 894/3612  | 298/1203  | D/E | gaT/gaG |
| -/3612    | -/1203    |     |         |
| -/7668    | -/2555    |     |         |
| -/7668    | -/2555    |     |         |
| 3888/4080 | 1296/1359 | V   | gtT/gtC |
| 433/1293  | 145/430   | I/L | Atc/Ctc |
| 723/1134  | 241/377   | S/R | agC/agG |



VEP annotated somatic variants

|                |             |     |         |
|----------------|-------------|-----|---------|
| -/1296         | -/431       |     |         |
| -/1740         | -/579       |     |         |
| -/1074         | -/357       |     |         |
| -/3495         | -/1164      |     |         |
| 3705/8091      | 1235/2696   | N   | aaT/aaC |
| -/2304         | -/767       |     |         |
| -/1674         | -/557       |     |         |
| -/633          | -/210       |     |         |
| 703/1086       | 235/361     | R/C | Cgc/Tgc |
| -/1488         | -/495       |     |         |
| 417/2391       | 139/796     | I   | atT/atA |
| -/2778         | -/925       |     |         |
| -/6273         | -/2090      |     |         |
| -/1143         | -/380       |     | r       |
| -/1407         | -/468       |     |         |
| -/1524         | -/507       |     |         |
| -/1524         | -/507       |     | r       |
| -/2226         | -/741       |     |         |
| -/2226         | -/741       |     |         |
| -/1596         | -/531       |     |         |
| -/1098         | -/365       |     |         |
| -/1098         | -/365       |     |         |
| -/1098         | -/365       |     |         |
| -/1308         | -/435       |     |         |
| -/459          | -/152       |     |         |
| 1884/5691      | 628/1896    | Y   | taC/taT |
| -/996          | -/331       |     |         |
| -/543          | -/180       |     |         |
| -/972          | -/323       |     |         |
| 374/948        | 125/315     | R/Q | cGa/cAa |
| 546/987        | 182/328     | L   | ttG/ttA |
| 43/948         | 15/315      | F/I | Ttt/Att |
| -/933          | -/310       |     |         |
| 657/933        | 219/310     | L   | ctC/ctT |
| 570/963        | 190/320     | S   | tcT/tcC |
| 895/1089       | 299/362     | I/V | Atc/Gtc |
| 759/942        | 253/313     | G   | ggC/ggA |
| 630/945        | 210/314     | I   | atC/atT |
| -/981          | -/326       |     |         |
| -/1443         | -/480       |     |         |
| -/1434         | -/477       |     |         |
| 855/1434       | 285/477     | S   | tcA/tcG |
| -/2940         | -/979       |     |         |
| -/2781         | -/926       |     |         |
| 1434-1435/1488 | 478-479/495 | -/S | -/AGC   |
| 533/1098       | 178/365     | N/T | aAc/aCc |
| 714/1527       | 238/508     | I   | atC/atT |
| 685/1983       | 229/660     | K/E | Aaa/Gaa |
| -/2892         | -/963       |     |         |
| -/393          | -/130       |     |         |
| -/1164         | -/387       |     |         |
| -/1797         | -/598       |     |         |
| 612/1797       | 204/598     | L   | ctG/ctC |
| 1640/2322      | 547/773     | A/V | gCg/gTg |
| -/2211         | -/736       |     |         |

VEP annotated somatic variants

|           |           |     |         |
|-----------|-----------|-----|---------|
| 84/1428   | 28/475    | R/S | agG/agT |
| 726/1239  | 242/412   | R   | cgC/cgT |
| -/1194    | -/397     |     |         |
| -/1353    | -/450     |     |         |
| 218/408   | 73/135    | I/T | aTa/aCa |
| -/5874    | -/1957    |     |         |
| 3362/3714 | 1121/1237 | G/V | gGa/gTa |
| -/15429   | -/5142    |     |         |
| 532/861   | 178/286   | V/I | Gta/Ata |
| -/10011   | -/3336    |     |         |
| 67/1830   | 23/609    | R/W | Cgg/Tgg |
| -/1638    | -/545     |     |         |
| 2205/2826 | 735/941   | I   | atC/atT |
| 252/2577  | 84/858    | L   | ctG/ctA |
| -/3270    | -/1089    |     |         |
| 3252/3321 | 1084/1106 | P   | ccA/ccG |
| -/3321    | -/1106    |     |         |
| -/1248    | -/415     |     |         |
| -/2367    | -/788     |     |         |
| -/2367    | -/788     |     |         |
| -/1554    | -/517     |     |         |
| 4625/5241 | 1542/1746 | S/T | aGc/aCc |
| -/3114    | -/1037    |     |         |
| 9/3114    | 3/1037    | P   | ccG/ccA |
| 1320/3114 | 440/1037  | P   | ccT/ccC |
| 1303/1482 | 435/493   | L/F | Ctt/Ttt |
| -/1482    | -/493     |     |         |
| -/2355    | -/784     |     |         |
| -/2355    | -/784     |     |         |
| -/2769    | -/922     |     |         |
| -/1254    | -/417     |     |         |
| 1181/1731 | 394/576   | R/Q | cGg/cAg |
| -/1026    | -/341     |     |         |
| -/3291    | -/1096    |     |         |
| -/5466    | -/1821    |     |         |
| -/3672    | -/1223    |     |         |
| -/4134    | -/1377    |     |         |
| 381/4947  | 127/1648  | A   | gcC/gcA |
| -/576     | -/191     |     |         |
| -/1188    | -/395     |     |         |
| 2010/2796 | 670/931   | T   | acT/acC |
| 376/1515  | 126/504   | N/D | Aat/Gat |
| -/2643    | -/880     |     |         |
| -/6297    | -/2098    |     |         |
| 132/981   | 44/326    | A   | gcC/gcA |
| -/2649    | -/882     |     |         |
| 1170/1932 | 390/643   | G   | ggC/ggT |
| -/12225   | -/4074    |     |         |
| -/2646    | -/881     |     |         |
| -/1326    | -/441     |     |         |
| -/1689    | -/562     |     |         |
| -/4377    | -/1458    |     |         |
| -/6909    | -/2302    |     |         |
| -/6909    | -/2302    |     |         |

VEP annotated somatic variants

|             |           |      |                     |
|-------------|-----------|------|---------------------|
| -/6909      | -/2302    |      |                     |
| 5330/6909   | 1777/2302 | T/I  | aCc/aTc             |
| -/3798      | -/1265    |      |                     |
| -/3390      | -/1129    |      |                     |
| -/3390      | -/1129    |      |                     |
| 4376/14055  | 1459/4684 | H/R  | cAc/cGc             |
| 789/14055   | 263/4684  | A    | gcT/gcC             |
| -/14055     | -/4684    |      |                     |
| 8664/14055  | 2888/4684 | N    | aaC/aaT             |
| 13872/14055 | 4624/4684 | A    | gcT/gcC             |
| 11538/14055 | 3846/4684 | A    | gcT/gcC             |
| -/3258      | -/1085    |      |                     |
| -/4095      | -/1364    |      |                     |
| -/4095      | -/1364    |      |                     |
| -/4095      | -/1364    |      |                     |
| -/1836      | -/611     |      |                     |
| -/1011      | -/336     |      |                     |
| -/1503      | -/500     |      |                     |
| -/5517      | -/1838    |      |                     |
| -/2418      | -/805     |      |                     |
| 1469/1599   | 490/532   | T/M  | aCg/aTg             |
| -/1446      | -/481     |      |                     |
| 2121/4128   | 707/1375  | P    | ccG/ccA<br>TMP_ESP_ |
| -/1728      | -/575     |      |                     |
| -/519       | -/172     |      |                     |
| -/951       | -/316     |      |                     |
| -/951       | -/316     |      |                     |
| -/2511      | -/836     |      |                     |
| 545/1080    | 182/359   | K/T  | aAg/aCg             |
| 34/1518     | 12/505    | P/A  | Cca/Gca             |
| 1431/1518   | 477/505   | H    | caC/caT             |
| -/1584      | -/527     |      |                     |
| 99-100/2268 | 33-34/755 | -/EP | -/GAACCC            |
| -/1434      | -/477     |      |                     |
| -/465       | -/154     |      |                     |
| -/1269      | -/422     |      |                     |
| -/3453      | -/1150    |      |                     |
| -/798       | -/265     |      |                     |
| -/1893      | -/630     |      |                     |
| -/2070      | -/689     |      |                     |
| -/816       | -/271     |      |                     |
| -/816       | -/271     |      |                     |
| -/816       | -/271     |      |                     |
| -/2133      | -/710     |      |                     |
| -/4821      | -/1606    |      |                     |
| -/669       | -/222     |      |                     |
| -/1683      | -/560     |      |                     |
| -/2031      | -/676     |      |                     |
| -/2031      | -/676     |      |                     |
| -/1779      | -/592     |      |                     |
| -/1914      | -/637     |      |                     |
| 545/1269    | 182/422   | P/L  | cCg/cTg             |
| -/1236      | -/411     |      |                     |
| -/1932      | -/643     |      |                     |
| -/2568      | -/855     |      |                     |

VEP annotated somatic variants

|           |           |       |            |
|-----------|-----------|-------|------------|
| -/9267    | -/3088    |       |            |
| -/1008    | -/335     |       |            |
| -/1260    | -/419     |       |            |
| -/1281    | -/426     |       |            |
| -/1371    | -/456     |       |            |
| -/867     | -/288     |       |            |
| -/795     | -/264     |       |            |
| -/990     | -/329     |       |            |
| -/2103    | -/700     |       |            |
| -/5724    | -/1907    |       |            |
| -/4338    | -/1445    |       |            |
| -/4341    | -/1446    |       |            |
| 2415/3048 | 805/1015  | P     | ccC/ccT    |
| -/1422    | -/473     |       |            |
| -/3567    | -/1188    |       |            |
| -/3567    | -/1188    |       |            |
| -/3567    | -/1188    |       |            |
| -/3567    | -/1188    |       |            |
| -/1260    | -/419     |       |            |
| -/1503    | -/500     |       |            |
| -/1914    | -/637     |       |            |
| 56/639    | 19/212    | V/A   | gTg/gCg    |
| -/636     | -/211     |       |            |
| -/666     | -/221     |       |            |
| -/2589    | -/862     |       |            |
| 1422/1704 | 474/567   | R     | cgC/cgT    |
| -/579     | -/192     |       |            |
| -/1155    | -/384     |       |            |
| 2175/3228 | 725/1075  | A     | gcA/gcC    |
| -/1947    | -/648     |       |            |
| -/2952    | -/983     |       |            |
| -/2184    | -/727     |       |            |
| -/2772    | -/923     |       |            |
| -/1239    | -/412     |       |            |
| 83/1035   | 28/344    | R/H   | cGt/cAt    |
| 2379/2793 | 793/930   | R     | cgA/cgC    |
| -/2943    | -/980     |       |            |
| -/3183    | -/1060    |       |            |
| -/660     | -/219     |       |            |
| 1560/2916 | 520/971   | P     | ccA/ccG    |
| -/1740    | -/579     |       |            |
| -/2388    | -/795     |       |            |
| 39-40/336 | 13-14/111 | -/*SX | -/TAATCCCC |
| -/954     | -/317     |       |            |
| 1623/1626 | 541/541   | T     | acA/acG    |
| -/1626    | -/541     |       |            |
| -/1737    | -/578     |       |            |
| -/2151    | -/716     |       |            |
| -/1464    | -/487     |       |            |
| -/1134    | -/377     |       |            |
| 2331/2355 | 777/784   | T     | acG/acA    |
| -/1176    | -/391     |       |            |
| -/1176    | -/391     |       |            |
| -/900     | -/299     |       |            |
| 123/2226  | 41/741    | V     | gtC/gtA    |

VEP annotated somatic variants

|            |           |     |  |         |
|------------|-----------|-----|--|---------|
| -/684      | -/227     |     |  |         |
| -/987      | -/328     |     |  |         |
| -/2199     | -/732     |     |  |         |
| -/663      | -/220     |     |  |         |
| -/4956     | -/1651    |     |  |         |
| -/4956     | -/1651    |     |  |         |
| 1292/4167  | 431/1388  | T/N |  | aCt/aAt |
| -/2814     | -/937     |     |  |         |
| -/7044     | -/2347    |     |  |         |
| -/1443     | -/480     |     |  |         |
| -/1326     | -/441     |     |  |         |
| -/1998     | -/665     |     |  |         |
| -/948      | -/315     |     |  |         |
| -/531      | -/176     |     |  |         |
| -/471      | -/156     |     |  |         |
| -/471      | -/156     |     |  |         |
| 111/1212   | 37/403    | P   |  | ccG/ccA |
| 492/792    | 164/263   | L   |  | ttG/ttA |
| -/2226     | -/741     |     |  |         |
| -/4008     | -/1335    |     |  |         |
| 2526/4008  | 842/1335  | T   |  | acC/acT |
| -/2277     | -/758     |     |  |         |
| 603/2277   | 201/758   | A   |  | gcG/gcA |
| 582/1329   | 194/442   | V   |  | gtA/gtG |
| -/834      | -/277     |     |  |         |
| 1412/3099  | 471/1032  | V/A |  | gTt/gCt |
| -/2127     | -/708     |     |  |         |
| 2064/2127  | 688/708   | P   |  | ccG/ccC |
| -/1926     | -/641     |     |  |         |
| -/1389     | -/462     |     |  |         |
| 3456/15117 | 1152/5038 | I   |  | atC/atT |
| -/15117    | -/5038    |     |  |         |
| 6384/15117 | 2128/5038 | Y   |  | taC/taT |
| -/15117    | -/5038    |     |  |         |
| -/14904    | -/4967    |     |  |         |
| -/14904    | -/4967    |     |  |         |
| -/14613    | -/4870    |     |  |         |
| -/519      | -/172     |     |  |         |
| -/2757     | -/918     |     |  |         |
| -/753      | -/250     |     |  |         |
| 5559/5682  | 1853/1893 | T   |  | acT/acC |
| -/5550     | -/1849    |     |  |         |
| -/3939     | -/1312    |     |  |         |
| 378/1044   | 126/347   | G   |  | ggG/ggA |
| -/2613     | -/870     |     |  |         |
| -/2067     | -/688     |     |  |         |
| 182/2148   | 61/715    | H/R |  | cAc/cGc |
| -/2067     | -/688     |     |  |         |
| -/2067     | -/688     |     |  |         |
| -/1245     | -/414     |     |  |         |
| -/6003     | -/2000    |     |  |         |
| 3448/5934  | 1150/1977 | W/R |  | Tgg/Cgg |

rs3

VEP annotated somatic variants

|           |          |     |         |
|-----------|----------|-----|---------|
| -/5934    | -/1977   |     |         |
| -/1356    | -/451    |     |         |
| -/6642    | -/2213   |     |         |
| -/969     | -/322    |     |         |
| 58/1194   | 20/397   | R/W | Cgg/Tgg |
| -/3183    | -/1060   |     |         |
| 1467/2304 | 489/767  | H/Q | caC/caG |
| -/3099    | -/1032   |     |         |
| -/3540    | -/1179   |     |         |
| -/3540    | -/1179   |     |         |
| 266/3540  | 89/1179  | V/A | gTt/gCt |
| -/3540    | -/1179   |     |         |
| -/2565    | -/854    |     |         |
| 730/747   | 244/248  | Y/D | Tat/Gat |
| -/1833    | -/610    |     |         |
| -/2493    | -/830    |     |         |
| -/2316    | -/771    |     |         |
| -/2316    | -/771    |     |         |
| -/2358    | -/785    |     |         |
| -/1077    | -/358    |     |         |
| -/1272    | -/423    |     |         |
| -/711     | -/236    |     |         |
| -/5772    | -/1923   |     |         |
| -/5772    | -/1923   |     |         |
| -/4329    | -/1442   |     |         |
| 111/3075  | 37/1024  | G   | ggA/ggC |
| -/3654    | -/1217   |     |         |
| -/261     | -/86     |     |         |
| -/1707    | -/568    |     |         |
| -/3156    | -/1051   |     |         |
| -/3156    | -/1051   |     |         |
| -/2250    | -/749    |     |         |
| -/1161    | -/386    |     |         |
| 1602/3318 | 534/1105 | A   | gcA/gcG |
| -/6486    | -/2161   |     |         |
| -/6486    | -/2161   |     |         |
| -/1389    | -/462    |     |         |
| 2956/4851 | 986/1616 | A/T | Gca/Aca |
| -/1788    | -/595    |     |         |
| -/2352    | -/783    |     |         |
| -/2004    | -/667    |     |         |
| -/5169    | -/1722   |     |         |
| -/1008    | -/335    |     |         |
| 96/1314   | 32/437   | T   | acG/acA |
| 340/1134  | 114/377  | I/V | Att/Gtt |
| -/3252    | -/1083   |     |         |
| -/1788    | -/595    |     |         |
| 97/1620   | 33/539   | S/P | Tct/Cct |
| -/1695    | -/564    |     |         |
| -/1695    | -/564    |     |         |
| 285/1674  | 95/557   | L   | ctT/ctC |
| -/1809    | -/602    |     |         |
| 495/1869  | 165/622  | H   | caT/caC |
| -/2031    | -/676    |     |         |
| -/1080    | -/359    |     |         |

VEP annotated somatic variants

|           |           |     |         |
|-----------|-----------|-----|---------|
| -/1080    | -/359     |     |         |
| -/1821    | -/606     |     |         |
| -/1950    | -/649     |     |         |
| -/1977    | -/658     |     |         |
| -/1434    | -/477     |     |         |
| -/996     | -/331     |     |         |
| -/1227    | -/408     |     |         |
| -/1473    | -/490     |     |         |
| -/1518    | -/505     |     |         |
| -/1389    | -/462     |     |         |
| 1656/2397 | 552/798   | V   | gtC/gtT |
| -/3726    | -/1241    |     |         |
| -/1932    | -/643     |     |         |
| -/1929    | -/642     |     |         |
| -/2211    | -/736     |     |         |
| -/1893    | -/630     |     |         |
| -/2121    | -/706     |     |         |
| -/1608    | -/535     |     |         |
| 1146/1608 | 382/535   | S   | agC/agT |
| 144/2178  | 48/725    | A   | gcG/gcC |
| -/1932    | -/643     |     |         |
| -/3165    | -/1054    |     |         |
| -/3159    | -/1052    |     |         |
| -/3708    | -/1235    |     |         |
| 126/1308  | 42/435    | Q   | caG/caA |
| -/2823    | -/940     |     |         |
| -/1287    | -/428     |     |         |
| -/3879    | -/1292    |     |         |
| -/3480    | -/1159    |     |         |
| 567/6672  | 189/2223  | N   | aaT/aaC |
| 1392/6672 | 464/2223  | P   | ccC/ccT |
| 240/543   | 80/180    | P   | ccC/ccA |
| -/1776    | -/591     |     |         |
| -/9804    | -/3267    |     |         |
| 7166/9804 | 2389/3267 | E/G | gAg/gGg |
| 598/759   | 200/252   | V/L | Gtt/Ctt |
| 12/1275   | 4/424     | P   | ccG/ccA |
| -/11025   | -/3674    |     |         |
| -/11025   | -/3674    |     |         |
| 4603/9693 | 1535/3230 | P/A | Cca/Gca |
| -/1128    | -/375     |     |         |
| -/1053    | -/350     |     |         |
| -/1125    | -/374     |     |         |
| -/1125    | -/374     |     |         |
| -/909     | -/302     |     |         |
| 3705/7656 | 1235/2551 | H   | caT/caC |
| -/1275    | -/424     |     |         |
| 381/888   | 127/295   | N   | aaC/aaT |
| -/14103   | -/4700    |     |         |
| -/2247    | -/748     |     |         |
| -/2364    | -/787     |     |         |

VEP annotated somatic variants

|           |           |     |             |    |
|-----------|-----------|-----|-------------|----|
| -/1713    | -/570     |     |             |    |
| 654/1197  | 218/398   | A   | gcA/gcG     |    |
| -/246     | -/81      |     |             |    |
| -/993     | -/330     |     |             |    |
| -/2019    | -/672     |     | rs746073071 |    |
| -/2514    | -/837     |     |             |    |
| -/2505    | -/834     |     |             |    |
| -/3456    | -/1151    |     |             |    |
| 610/1269  | 204/422   | S/G | Agc/Ggc     |    |
| -/942     | -/313     |     |             |    |
| -/1005    | -/334     |     |             |    |
| -/312     | -/103     |     |             | rs |
| 163/288   | 55/95     | V/M | Gtg/Atg     |    |
| -/3264    | -/1087    |     |             |    |
| -/3264    | -/1087    |     |             |    |
| -/768     | -/255     |     |             |    |
| -/1758    | -/585     |     |             |    |
| 3381/3825 | 1127/1274 | A   | gcC/gcG     |    |
| 399/20724 | 133/6907  | L   | ctG/ctC     |    |
| -/20724   | -/6907    |     |             |    |
| 2850/4491 | 950/1496  | D   | gaC/gaT     |    |
| 1697/4695 | 566/1564  | P/L | cCg/cTg     |    |
| 461/3786  | 154/1261  | G/A | gGc/gCc     |    |
| 1440/2082 | 480/693   | V   | gtG/gtA     |    |
| -/2082    | -/693     |     |             |    |
| 1541/2517 | 514/838   | G/E | gGg/gAg     |    |
| -/1389    | -/462     |     |             |    |
| -/2196    | -/731     |     |             |    |
| 204/2196  | 68/731    | S   | tcC/tcT     |    |
| -/2409    | -/802     |     |             |    |
| -/2409    | -/802     |     |             |    |
| 766/2286  | 256/761   | V/I | Gtc/Atc     |    |
| -/2286    | -/761     |     |             |    |
| 338/1554  | 113/517   | T/M | aCg/aTg     |    |
| -/3897    | -/1298    |     |             |    |
| 2152/2454 | 718/817   | I/V | Att/Gtt     |    |
| -/2682    | -/893     |     |             |    |
| -/1158    | -/385     |     |             |    |
| 203/684   | 68/227    | G/A | gGa/gCa     |    |
| 1487/2397 | 496/798   | L/S | tTa/tCa     |    |
| -/3297    | -/1098    |     |             |    |
| -/1284    | -/427     |     |             |    |
| 819/4149  | 273/1382  | L   | ctC/ctT     |    |
| -/8199    | -/2732    |     |             |    |
| -/8325    | -/2774    |     |             |    |
| -/1503    | -/500     |     |             |    |
| -/4983    | -/1660    |     |             |    |
| -/4494    | -/1497    |     |             |    |
| -/3405    | -/1134    |     |             |    |
| 313/870   | 105/289   |     |             | rs |
| 633/1041  | 211/346   | T   | acG/acA     |    |
| 427/1218  | 143/405   | A/T | Gct/Act     |    |
| -/762     | -/253     |     |             |    |
| -/2556    | -/851     |     |             |    |



VEP annotated somatic variants

|           |           |     |         |
|-----------|-----------|-----|---------|
| 589/726   | 197/241   | V/I | Gtc/Atc |
| 777/2133  | 259/710   | S   | agT/agC |
| -/3519    | -/1172    |     |         |
| -/1140    | -/379     |     |         |
| 1734/4974 | 578/1657  | A   | gcA/gcG |
| -/693     | -/230     |     |         |
| -/1512    | -/503     |     |         |
| -/4776    | -/1591    |     |         |
| -/5106    | -/1701    |     |         |
| 1671/2139 | 557/712   | D   | gaC/gaT |
| -/747     | -/248     |     |         |
| -/1896    | -/631     |     |         |
| -/1896    | -/631     |     |         |
| -/744     | -/247     |     |         |
| 1689/2319 | 563/772   | S   | tcG/tcA |
| -/2319    | -/772     |     |         |
| -/2253    | -/750     |     |         |
| 2872/3042 | 958/1013  | T/A | Aca/Gca |
| -/3048    | -/1015    |     |         |
| -/3048    | -/1015    |     |         |
| 2532/3048 | 844/1015  | A   | gcC/gcT |
| -/7629    | -/2542    |     |         |
| -/855     | -/284     |     |         |
| 16/723    | 6/240     | F/L | Ttt/Ctt |
| -/5652    | -/1883    |     |         |
| 20/558    | 7/185     | R/Q | cGg/cAg |
| -/750     | -/249     |     |         |
| -/1053    | -/350     |     |         |
| -/438     | -/145     |     |         |
| 373/483   | 125/160   | L   | Ttg/Ctg |
| -/1266    | -/421     |     |         |
| -/2373    | -/790     |     |         |
| 276/705   | 92/234    | R   | agG/agA |
| 4818/8907 | 1606/2968 | S   | tcG/tcC |
| -/2148    | -/715     |     |         |
| 1493/2148 | 498/715   | S/N | aGt/aAt |
| 1074/5934 | 358/1977  | D/E | gaC/gaG |
| 3421/5934 | 1141/1977 | K/Q | Aag/Cag |
| -/5934    | -/1977    |     |         |
| 108/903   | 36/300    | E   | gaG/gaA |
| -/855     | -/284     |     |         |
| -/660     | -/219     |     |         |
| 597/660   | 199/219   | S   | tcA/tcG |
| -/828     | -/275     |     |         |
| -/522     | -/173     |     |         |
| -/477     | -/158     |     |         |
| -/477     | -/158     |     |         |
| 2500/3603 | 834/1200  | C/S | Tgt/Agt |
| -/711     | -/236     |     |         |
| -/1398    | -/465     |     |         |
| -/1542    | -/513     |     |         |
| -/2280    | -/759     |     |         |
| -/1428    | -/475     |     |         |
| 2035/2352 | 679/783   | M/V | Atg/Gtg |
| -/2133    | -/710     |     |         |

VEP annotated somatic variants

|            |           |     |         |
|------------|-----------|-----|---------|
| -/2133     | -/710     |     |         |
| 4398/9294  | 1466/3097 | D   | gaT/gaC |
| 52/1431    | 18/476    | P/S | Cct/Tct |
| 1554/1980  | 518/659   | P   | ccA/ccG |
| -/1515     | -/504     |     |         |
| -/2394     | -/797     |     |         |
| -/4929     | -/1642    |     |         |
| 1003/3498  | 335/1165  | V/L | Gtg/Ttg |
| -/5598     | -/1865    |     |         |
| -/2616     | -/871     |     |         |
| 965/3495   | 322/1164  | M/T | aTg/aCg |
| -/3495     | -/1164    |     |         |
| -/5424     | -/1807    |     |         |
| -/726      | -/241     |     |         |
| 322/738    | 108/245   | A/T | Gcc/Acc |
| -/750      | -/249     |     |         |
| 1026/1077  | 342/358   | R   | agG/agA |
| -/3966     | -/1321    |     |         |
| 1868/3966  | 623/1321  | G/A | gGc/gCc |
| -/3366     | -/1121    |     |         |
| -/1143     | -/380     |     |         |
| 178/7446   | 60/2481   | E/K | Gag/Aag |
| -/8148     | -/2715    |     |         |
| -/8148     | -/2715    |     |         |
| -/8148     | -/2715    |     |         |
| 2874/8148  | 958/2715  | C   | tgT/tgC |
| -/8148     | -/2715    |     |         |
| 750/1272   | 250/423   | E   | gaG/gaA |
| 603/2676   | 201/891   | L   | ctT/ctC |
| -/1686     | -/561     |     |         |
| -/3075     | -/1024    |     |         |
| -/5460     | -/1819    |     |         |
| 597/4632   | 199/1543  | R   | agA/agG |
| -/4632     | -/1543    |     |         |
| -/1074     | -/357     |     |         |
| -/1464     | -/487     |     |         |
| -/1986     | -/661     |     |         |
| -/1950     | -/649     |     |         |
| 1503/3252  | 501/1083  | Y   | taT/taC |
| -/15552    | -/5183    |     |         |
| -/996      | -/331     |     |         |
| -/939      | -/312     |     |         |
| -/2409     | -/802     |     |         |
| -/3828     | -/1275    |     |         |
| -/4341     | -/1446    |     |         |
| 4006/4341  | 1336/1446 | D/N | Gac/Aac |
| -/4341     | -/1446    |     |         |
| -/2796     | -/931     |     |         |
| -/2043     | -/680     |     |         |
| 957/1155   | 319/384   | V   | gtG/gtA |
| -/930      | -/309     |     |         |
| 6875/15609 | 2292/5202 | R/H | cGt/cAt |
| 1608/2112  | 536/703   | A   | gcA/gcG |

VEP annotated somatic variants

|                |                |           |                   |
|----------------|----------------|-----------|-------------------|
| 1495-1496/2397 | 499/798        | F/*LSSX   | ttt/tAGCTCAGTTCtt |
| 600/2892       | 200/963        | L         | ctG/ctT           |
| -/1119         | -/372          |           |                   |
| -/2745         | -/914          |           |                   |
| -/1578         | -/525          |           |                   |
| -/10641        | -/3546         |           |                   |
| -/1557         | -/518          |           |                   |
| -/8358         | -/2785         |           |                   |
| -/8358         | -/2785         |           |                   |
| -/4044         | -/1347         |           |                   |
| -/1401         | -/466          |           |                   |
| 1249/1317      | 417/438        | G/S       | Ggc/Agc           |
| -/1527         | -/508          |           |                   |
| 669/699        | 223/232        | L         | ctG/ctA           |
| -/897          | -/298          |           |                   |
| -/897          | -/298          |           |                   |
| 646/738        | 216/245        | R/W       | Agg/Tgg           |
| -/9555         | -/3184         |           |                   |
| -/3675         | -/1224         |           |                   |
| 834/3675       | 278/1224       | T         | acG/acA           |
| -/3675         | -/1224         |           |                   |
| 2958/3675      | 986/1224       | L         | ctG/ctA           |
| -/3675         | -/1224         |           |                   |
| -/3969         | -/1322         |           |                   |
| -/1986         | -/661          |           |                   |
| -/2034         | -/677          |           |                   |
| -/2034         | -/677          |           |                   |
| -/3201         | -/1066         |           |                   |
| 6785-6802/8622 | 2262-2268/2873 | VREEEEE/E | 3GGAGGAGGAGGAGG:  |
| -/2244         | -/747          |           |                   |
| -/1365         | -/454          |           |                   |
| 421/7149       | 141/2382       | A/T       | Gcc/Acc           |
| 1170/1176      | 390/391        | Q         | caA/caG           |
| 32/1056        | 11/351         | C/S       | tGt/tCt           |
| -/1998         | -/665          |           |                   |
| -/1215         | -/404          |           |                   |
| -/3360         | -/1119         |           |                   |
| 2494/2613      | 832/870        | L         | Ctg/Ttg           |
| -/2568         | -/855          |           |                   |
| -/1188         | -/395          |           |                   |
| -/2001         | -/666          |           |                   |
| -/1524         | -/507          |           |                   |
| 2679/3615      | 893/1204       | R         | cgT/cgG           |
| 618/1902       | 206/633        | P         | ccA/ccG           |
| -/1902         | -/633          |           |                   |
| -/1095         | -/364          |           |                   |
| -/2667         | -/888          |           |                   |
| 171/2667       | 57/888         | E         | gaA/gaG           |
| 1296/1545      | 432/514        | E         | gaG/gaA           |
| -/669          | -/222          |           |                   |
| -/1584         | -/527          |           |                   |
| -/1584         | -/527          |           |                   |
| -/1584         | -/527          |           |                   |
| -/2847         | -/948          |           |                   |
| -/2934         | -/977          |           |                   |

VEP annotated somatic variants

|           |           |     |         |
|-----------|-----------|-----|---------|
| 621/1212  | 207/403   | P   | ccC/ccG |
| 221/1134  | 74/377    | N/I | aAc/aTc |
| 618/1242  | 206/413   | T   | acC/acT |
| -/1038    | -/345     |     |         |
| -/438     | -/145     |     |         |
| 4634/7719 | 1545/2572 | V/A | gTt/gCt |
| -/3456    | -/1151    |     |         |
| -/1416    | -/471     |     |         |
| -/2520    | -/839     |     |         |
| -/1323    | -/440     |     |         |
| -/1323    | -/440     |     |         |
| -/2166    | -/721     |     |         |
| 969/990   | 323/329   | C   | tgC/tgT |
| 362/1980  | 121/659   | L/P | cTg/cCg |
| -/1662    | -/553     |     |         |
| -/1389    | -/462     |     |         |
| -/1173    | -/390     |     |         |
| -/2067    | -/688     |     |         |
| 1356/1959 | 452/652   | T   | acA/acC |
| -/2082    | -/693     |     |         |
| -/1557    | -/518     |     |         |
| -/2325    | -/774     |     |         |
| -/2679    | -/892     |     |         |
| 2777/3804 | 926/1267  | S/N | aGc/aAc |
| 1358/2715 | 453/904   | S/Y | tCc/tAc |
| 203/1758  | 68/585    | T/I | aCa/aTa |
| -/1587    | -/528     |     |         |
| 80/1767   | 27/588    | G/E | gGa/gAa |
| 285/1638  | 95/545    | S   | tcC/tcT |
| 337/1692  | 113/563   | K/E | Aaa/Gaa |
| -/2745    | -/914     |     |         |
| 1434/1533 | 478/510   | T   | acG/acA |
| 578/1218  | 193/405   | V/G | gTc/gGc |
| 1251/1956 | 417/651   | K   | aaG/aaA |
| 2598/2784 | 866/927   | V   | gtC/gtT |
| 473/1917  | 158/638   | T/I | aCc/aTc |
| -/1845    | -/614     |     |         |
| -/2970    | -/989     |     |         |
| -/8886    | -/2961    |     |         |

VEP annotated somatic variants

| Existing_variation     | ALLELE_NUM | DISTANCE | STRAND_VEP |
|------------------------|------------|----------|------------|
|                        | 1          |          | 1          |
| rs10978447             | 1          |          | -1         |
| rs279677               | 1          |          | -1         |
| s11077414,COSM400028   | 1          |          | -1         |
|                        | 1          |          | -1         |
| rs2041171              | 1          |          | -1         |
| rs2364315              | 1          |          | -1         |
| rs6501947              | 1          |          | -1         |
| rs554012320            | 1          |          | 1          |
| rs55685226             | 1          |          | -1         |
| 1881,rs1799859,COSM37  | 1          |          | -1         |
| rs150746310            | 1          |          | -1         |
| rs12600864             | 1          |          | -1         |
| rs740250               | 1          | 339      | 1          |
| 144177905,COSM376016   | 1          |          | -1         |
|                        | 1          |          | 1          |
| rs1251075              | 1          |          | 1          |
| rs41291346             | 1          |          | 1          |
| rs41303309             | 1          |          | -1         |
| rs747166030            | 1          |          | -1         |
| rs11039146             | 1          |          | -1         |
| rs13087169             | 1          |          | 1          |
| rs12915634             | 1          |          | -1         |
| rs61729367             | 1          |          | 1          |
| rs7485573              | 1          |          | 1          |
|                        | 1          |          | 1          |
| s41264285,COSM374756   | 1          |          | 1          |
| rs35431407             | 1          |          | -1         |
| s12774070,COSM427846   | 1          |          | 1          |
| rs2251105              | 1          |          | -1         |
| _ESP_12_43887065_4388  | 1          |          | -1         |
| rs3813622              | 1          |          | -1         |
| rs75553188             | 1          |          | -1         |
| rs56778727             | 1          |          | 1          |
| rs67418568             | 1          |          | 1          |
| rs41282522             | 1          | 87       | -1         |
| 13751546,COSM3751547   | 1          |          | -1         |
| rs342467               | 1          |          | 1          |
| rs34463921             | 1          |          | 1          |
| rs200527701            | 1          |          | 1          |
| rs12671813             | 1          |          | 1          |
| rs5182,COSM4157351     | 1          |          | 1          |
| rs13218824             | 1          |          | -1         |
| rs8050390              | 1          |          | 1          |
| 11,COSM4160250,COSM    | 1          |          | 1          |
| rs7517559              | 1          |          | -1         |
| rs72649360             | 1          |          | -1         |
| ,rs62619924,RISN_AIPL1 | 1          |          | -1         |
| rs878081,COSM4002050   | 1          |          | 1          |
| rs1003854              | 1          |          | 1          |
| rs733957               | 1          |          | 1          |
| rs17164315             | 1          |          | 1          |
| rs369069231,rs4732036  | 1          |          | 1          |
|                        | 1          |          | 1          |

VEP annotated somatic variants

|                          |   |     |    |
|--------------------------|---|-----|----|
| rs62128062               | 1 |     | 1  |
| rs4646686                | 1 |     | 1  |
| rs1051713                | 1 |     | 1  |
| rs55736017               | 1 |     | 1  |
| rs2289140                | 1 |     | 1  |
| rs1626649                | 1 |     | -1 |
| rs1793173                | 1 |     | -1 |
| rs56780932,COSM383657    | 1 |     | -1 |
| rs2304872                | 1 |     | -1 |
| rs3067424                | 1 |     | 1  |
| rs4938014                | 1 |     | 1  |
| rs35235926               | 1 |     | -1 |
| rs7853994,COSM455856     | 1 |     | 1  |
| rs7096505                | 1 |     | -1 |
| rs42,COSM4002502,COSM    | 1 |     | -1 |
| rs11578772               | 1 |     | 1  |
| rs871130                 | 1 |     | -1 |
| rs115250350              | 1 |     | -1 |
|                          | 1 |     | 1  |
|                          | 1 |     | 1  |
| rs2301587                | 1 |     | -1 |
| rs140072315              | 1 |     | 1  |
| rs755049876              | 1 |     | 1  |
|                          | 1 |     | 1  |
| rs74869251               | 1 |     | 1  |
|                          | 1 |     | 1  |
| rs71428454,COSM140684    | 1 |     | 1  |
| rs71428453               | 1 |     | 1  |
| rs455671                 | 1 |     | -1 |
| rs17138632,COSM448467    | 1 |     | 1  |
|                          | 1 |     | -1 |
| rs2276932                | 1 |     | 1  |
| rs793524                 | 1 |     | -1 |
| rs10521763               | 1 |     | 1  |
| rs62620965               | 1 |     | -1 |
| rs16837847               | 1 |     | -1 |
| rs7550948                | 1 |     | 1  |
| rs74404550               | 1 | 120 | -1 |
| rs34,COSM4002790,COSM    | 1 |     | -1 |
| rs13753583,COSM3753584   | 1 |     | 1  |
| rs10972173               | 1 |     | -1 |
| rs12359433               | 1 |     | 1  |
| rs6778511                | 1 |     | 1  |
| rs963618                 | 1 |     | 1  |
| rs5951332                | 1 |     | 1  |
| rs2361298                | 1 | 480 | 1  |
| rs3174476                | 1 |     | 1  |
| rs28365160               | 1 |     | 1  |
| rs2305738                | 1 |     | 1  |
| rs28597966               | 1 |     | 1  |
| rs390179,rs6151415,CM963 | 1 |     | -1 |
|                          | 1 |     | -1 |
| rs2257090                | 1 |     | -1 |
| rs62251997               | 1 |     | -1 |
| rs143019035              | 1 |     | 1  |

VEP annotated somatic variants

|                       |   |    |
|-----------------------|---|----|
|                       | 1 | -1 |
| rs1872858             | 1 | 1  |
| rs9895872             | 1 | 1  |
| rs1168966             | 1 | -1 |
| rs749457              | 1 | -1 |
| rs11790014            | 1 | -1 |
| rs8086318             | 1 | 1  |
|                       | 1 | -1 |
| rs12125325            | 1 | 1  |
| rs45570436            | 1 | 1  |
| rs36048052,COSM376567 | 1 | 1  |
| rs56290406            | 1 | -1 |
| rs17846715            | 1 | 1  |
| rs12131640            | 1 | 1  |
| rs1891                | 1 | 1  |
| rs2853759             | 1 | 1  |
| rs113968994           | 1 | 1  |
|                       | 1 | -1 |
| rs6021355             | 1 | -1 |
| rs3827032             | 1 | -1 |
| rs6442124             | 1 | 1  |
| rs35725751            | 1 | 1  |
| rs1152194             | 1 | 1  |
| rs2281933             | 1 | -1 |
| rs11577579,COSM146698 | 1 | 1  |
| rs11374767            | 1 | -1 |
| rs86,CM076013,COSM413 | 1 | 1  |
| rs7210438             | 1 | 1  |
|                       | 1 | 1  |
| rs309370,COSM4002928  | 1 | 1  |
| rs45500792            | 1 | 1  |
| rs73137012            | 1 | -1 |
| rs12388749            | 1 | 1  |
| rs741886              | 1 | 1  |
| rs754125003           | 1 | 1  |
| rs34233512            | 1 | -1 |
| rs41308602            | 1 | 1  |
| rs536159058           | 1 | -1 |
| rs62207506            | 1 | 1  |
| rs193243275           | 1 | 1  |
| rs3092994,CS045209    | 1 | -1 |
| rs8176235             | 1 | -1 |
| rs273900734           | 1 | -1 |
| rs2126042             | 1 | 1  |
| rs13153992            | 1 | -1 |
| rs30,COSM1616075,COSM | 1 | -1 |
| rs2273376             | 1 | -1 |
| rs2283569             | 1 | 1  |
| rs28992474            | 1 | 1  |
| rs11200559            | 1 | 1  |
| rs986178,COSM915571   | 1 | 1  |
|                       | 1 | 1  |
|                       | 1 | -1 |
| rs36,COSM3749919,COSM | 1 | 1  |
| rs11652816            | 1 | -1 |

VEP annotated somatic variants

|                        |   |      |    |
|------------------------|---|------|----|
|                        | 1 | 4376 | -1 |
| 43,COSM4144742,COSM    | 1 |      | 1  |
| rs7079392              | 1 |      | -1 |
| rs3740694              | 1 |      | 1  |
| rs10507274             | 1 |      | -1 |
| rs2111146              | 1 |      | 1  |
| rs139293175            | 1 |      | 1  |
| rs112580616            | 1 |      | 1  |
| rs2302315              | 1 | 201  | 1  |
| rs730228               | 1 |      | 1  |
| 18,COSM4140259,COSM    | 1 |      | -1 |
| rs2304176              | 1 |      | 1  |
| 572,BGMUT_792,COSM:    | 1 |      | -1 |
| 267,COSM425808,COSM    | 1 |      | 1  |
| rs148512971            | 1 |      | -1 |
| rs6688703              | 1 |      | -1 |
| rs41289218             | 1 |      | -1 |
| rs11077410             | 1 |      | 1  |
| rs761967500            | 1 |      | -1 |
|                        | 1 |      | -1 |
| rs366510               | 1 |      | -1 |
|                        | 1 |      | 1  |
| rs41260544             | 1 |      | -1 |
| rs2269067              | 1 |      | -1 |
| rs665728,COSM4161167   | 1 |      | 1  |
| rs139255231            | 1 |      | 1  |
| rs2286634              | 1 |      | -1 |
| rs149154082            | 1 |      | -1 |
| rs62231971             | 1 |      | 1  |
|                        | 1 |      | -1 |
| rs7034745,COSM150752   | 1 |      | 1  |
| rs77802779             | 1 |      | 1  |
|                        | 1 |      | -1 |
| rs2239801              | 1 |      | -1 |
| rs11014511             | 1 |      | 1  |
| rs187651793            | 1 |      | -1 |
| rs7797991              | 1 |      | 1  |
|                        | 1 |      | 1  |
| rs41291299             | 1 |      | 1  |
| rs734348               | 1 |      | -1 |
| rs343989               | 1 |      | 1  |
| M3773923,COSM377392    | 1 |      | 1  |
| rs6925778              | 1 |      | 1  |
| rs2493145              | 1 |      | 1  |
| rs181863983            | 1 |      | 1  |
| rs738304               | 1 |      | -1 |
| rs2304134              | 1 |      | -1 |
| rs11574685             | 1 |      | 1  |
| rs3747622              | 1 |      | 1  |
|                        | 1 |      | -1 |
| rs8106895              | 1 |      | 1  |
| rs1974763,CAV3:c.27C>T | 1 |      | 1  |
| rs74901418             | 1 |      | -1 |
| rs11280083             | 1 |      | 1  |
| rs35352238,COSM413129  | 1 |      | 1  |



VEP annotated somatic variants

|                         |   |    |
|-------------------------|---|----|
| rs920791                | 1 | -1 |
|                         | 1 | 1  |
| rs144266211             | 1 | 1  |
| rs74002500              | 1 | 1  |
| rs146524252             | 1 | 1  |
|                         | 1 | -1 |
| rs3762117               | 1 | -1 |
| rs670650                | 1 | 1  |
| rs11653797              | 1 | -1 |
|                         | 1 | -1 |
| rs11234627              | 1 | 1  |
| rs3136658               | 1 | -1 |
| rs3092960               | 1 | 1  |
| rs2351528,COSM1445871   | 1 | 1  |
| rs3227,rs58161637,COSM  | 1 | -1 |
| rs11265493              | 1 | -1 |
| rs55682471              | 1 | 1  |
| rs735482,COSM3756954    | 1 | 1  |
| rs4844390               | 1 | 1  |
| rs779696544,COSM156412  | 1 | -1 |
| rs545464360             | 1 | -1 |
| rs561895                | 1 | -1 |
| rs2073760               | 1 | 1  |
| rs3749191               | 1 | -1 |
| rs368295466             | 1 | -1 |
| rs2272211               | 1 | -1 |
| rs2069529               | 1 | 1  |
|                         | 1 | 1  |
| rs56087852,COSM150057   | 1 | 1  |
| rs762173324             | 1 | 1  |
| rs13043456              | 1 | 1  |
| rs1265045               | 1 | -1 |
| rs2302399               | 1 | -1 |
| rs143775364             | 1 | 1  |
| rs5828129               | 1 | 1  |
| rs2231496               | 1 | -1 |
| rs2300687               | 1 | 1  |
| rs5747211,COSM149250    | 1 | 1  |
| rs2244682               | 1 | -1 |
| rs75243280,COSM413511   | 1 | -1 |
| rs56066672,rs68186132   | 1 | 1  |
| rs41285260              | 1 | 1  |
| rs117156562             | 1 | 1  |
|                         | 1 | 1  |
| rs62269547              | 1 | 1  |
| rs6766818               | 1 | 1  |
| rs1673607               | 1 | -1 |
|                         | 1 | 1  |
| rs2270202               | 1 | 1  |
|                         | 1 | 1  |
| rs1020,rs1061170,COSM41 | 1 | 1  |
| rs2143,rs1800136,COSM37 | 1 | 1  |
| rs111775228             | 1 | -1 |
| rs1890042,COSM4142541   | 1 | 1  |
| rs2291254               | 1 | -1 |

VEP annotated somatic variants

|                        |   |    |
|------------------------|---|----|
| rs12832244             | 1 | -1 |
| rs11556868,COSM414213  | 1 | 1  |
| rs2302764              | 1 | 1  |
| rs582736               | 1 | 1  |
| rs4781019              | 1 | 1  |
| rs7012                 | 1 | -1 |
| rs278126               | 1 | -1 |
| rs3012627              | 1 | -1 |
| rs34054011             | 1 | 1  |
|                        | 1 | 1  |
| rs34398185             | 1 | 1  |
|                        | 1 | -1 |
| rs11834597             | 1 | -1 |
| rs559165               | 1 | -1 |
|                        | 1 | 1  |
| rs3817012              | 1 | -1 |
| rs2305450              | 1 | 1  |
|                        | 1 | 1  |
| rs3829211              | 1 | 1  |
| rs11540994             | 1 | -1 |
| rs1660694              | 1 | 1  |
| rs1353,CM074755,COSM37 | 1 | -1 |
| rs13068264             | 1 | 1  |
| rs3779032              | 1 | 1  |
| rs3779031,COSM150415   | 1 | 1  |
| rs72760251             | 1 | 1  |
| rs1129262,COSM131897   | 1 | -1 |
| rs2303793              | 1 | -1 |
| rs62482495             | 1 | -1 |
|                        | 1 | -1 |
| rs2973747              | 1 | -1 |
| rs7538391              | 1 | -1 |
| rs17128726             | 1 | -1 |
| rs17393069,COSM144684  | 1 | 1  |
| rs2295915              | 1 | -1 |
|                        | 1 | -1 |
| rs2839077              | 1 | 1  |
|                        | 1 | -1 |
| rs18,CM970391,COSM375  | 1 | 1  |
| rs10927335             | 1 | 1  |
|                        | 1 | -1 |
| rs117188117            | 1 | -1 |
| rs1564823              | 1 | 1  |
| rs17618,COSM3750835    | 1 | 1  |
| rs10760282             | 1 | 1  |
| rs8192494              | 1 | -1 |
| rs181484126            | 1 | 1  |
| rs3821157              | 1 | 1  |
| rs2,COSM3774265,COSM   | 1 | -1 |
|                        | 1 | -1 |
| rs147910113            | 1 | 1  |
| rs1506441              | 1 | 1  |
| rs974572               | 1 | 1  |
| rs2515838              | 1 | 1  |
|                        | 1 | -1 |

VEP annotated somatic variants

|                              |   |    |
|------------------------------|---|----|
| rs62027240,COSM434326        | 1 | -1 |
| rs11699220                   | 1 | -1 |
| rs4502229                    | 1 | -1 |
| rs3750863                    | 1 | -1 |
| rs2297581                    | 1 | -1 |
| rs41289311,COSM414457        | 1 | -1 |
| rs12248333                   | 1 | -1 |
| rs41274912                   | 1 | -1 |
| rs10231075                   | 1 | 1  |
| rs782154947                  | 1 | 1  |
| rs2304858                    | 1 | -1 |
| rs6433817,COSM4154717        | 1 | -1 |
| rs10,COSM4165632,COSM4165633 | 1 | -1 |
| rs10                         | 1 | -1 |
| rs35206429                   | 1 | -1 |
| rs1709082                    | 1 | 1  |
| rs1709081                    | 1 | 1  |
| rs16995376,COSM375639        | 1 | -1 |
| rs4729021                    | 1 | 1  |
| rs198430,COSM429407          | 1 | -1 |
| rs687670                     | 1 | 1  |
| rs2622733                    | 1 | -1 |
| rs1056142                    | 1 | 1  |
| rs10409785                   | 1 | 1  |
| rs55681834                   | 1 | 1  |
| rs1431196                    | 1 | 1  |
| rs9467075                    | 1 | -1 |
| rs4742,COSM3760499           | 1 | -1 |
| rs531346334                  | 1 | 1  |
| rs41313157                   | 1 | 1  |
| rs17416794                   | 1 | -1 |
| rs10739633                   | 1 | -1 |
| rs952374,COSM3752807         | 1 | -1 |
| rs9942410                    | 1 | -1 |
| rs5993488                    | 1 | -1 |
| rs374861176                  | 1 | -1 |
| rs2275874                    | 1 | -1 |
| rs146907010                  | 1 | -1 |
| rs4072887                    | 1 | -1 |
| rs9915640                    | 1 | 1  |
| rs55956367                   | 1 | 1  |
| rs2271958                    | 1 | 1  |
| rs72792311                   | 1 | -1 |
| rs3082917                    | 1 | 1  |
| rs3082                       | 1 | 1  |
| rs11588937                   | 1 | 1  |
| rs10096210                   | 1 | -1 |
| rs17146082                   | 1 | -1 |
| rs2281868,COSM4156987        | 1 | 1  |
| rs778081516,rs41274582       | 1 | -1 |
| rs72857275                   | 1 | -1 |

VEP annotated somatic variants

|                       |   |    |
|-----------------------|---|----|
| rs11084816            | 1 | -1 |
| rs12221039            | 1 | -1 |
|                       | 1 | 1  |
| rs4234394             | 1 | -1 |
| rs12034925            | 1 | 1  |
| rs12042900            | 1 | 1  |
| rs1995482             | 1 | 1  |
| rs79984676            | 1 | 1  |
| rs41304141            | 1 | 1  |
| rs12951733            | 1 | -1 |
|                       | 1 | 1  |
| rs12948962            | 1 | 1  |
| rs41267309            | 1 | 1  |
| rs41298531            | 1 | 1  |
|                       | 1 | -1 |
| rs6884561             | 1 | 1  |
| rs2306431             | 1 | 1  |
| rs2286329             | 1 | 1  |
| rs1126464,COSM174983  | 1 | 1  |
| rs2304175             | 1 | -1 |
|                       | 1 | -1 |
| rs61935050            | 1 | -1 |
| rs76390929            | 1 | 1  |
| rs3213505             | 1 | 1  |
| rs3747280             | 1 | 1  |
| rs5967281             | 1 | 1  |
| rs2276343             | 1 | -1 |
| rs140490580           | 1 | 1  |
| rs7234288             | 1 | 1  |
| rs375,COSM148419,COSM | 1 | 1  |
| rs56148603            | 1 | 1  |
|                       | 1 | -1 |
| rs34278949            | 1 | -1 |
| rs369225897           | 1 | -1 |
| rs191289705           | 1 | -1 |
| rs4236506,COSM145211  | 1 | 1  |
| rs1005887             | 1 | -1 |
| rs770087              | 1 | -1 |
| rs62467724            | 1 | 1  |
| rs313407              | 1 | 1  |
| rs1782383             | 1 | -1 |
| rs782358140           | 1 | 1  |
| rs1076669             | 1 | -1 |
| rs6750085             | 1 | -1 |
| rs35443668            | 1 | 1  |
| rs1919691             | 1 | 1  |
|                       | 1 | -1 |
| rs2070699             | 1 | 1  |
|                       | 1 | -1 |
| rs61933720            | 1 | -1 |
| rs310618              | 1 | -1 |
|                       | 1 | -1 |
| rs56380058            | 1 | 1  |
| rs111797029           | 1 | 1  |
| rs10848906            | 1 | -1 |

VEP annotated somatic variants

|                         |   |      |    |
|-------------------------|---|------|----|
| 71,COSM3760028,COSM     | 1 |      | -1 |
| rs188362092             | 1 |      | -1 |
| rs771999554,rs2120276   | 1 |      | -1 |
| 72,COSM3759453,COSM     | 1 |      | 1  |
| rs2181440               | 1 |      | -1 |
| rs2071857,COSM3759172   | 1 |      | -1 |
| rs8142615,COSM1416128   | 1 |      | -1 |
| rs7292751,COSM3759172   | 1 |      | -1 |
| rs2239691               | 1 |      | 1  |
|                         | 1 |      | -1 |
| rs709683                | 1 |      | -1 |
| rs2252767               | 1 |      | 1  |
| rs1871685               | 1 |      | 1  |
| rs2250718,COSM3999148   | 1 |      | 1  |
| rs2273707               | 1 |      | 1  |
| rs2273706               | 1 |      | 1  |
| rs79126103,COSM123878   | 1 |      | -1 |
| rs10760503              | 1 |      | -1 |
|                         | 1 |      | -1 |
| rs3176889               | 1 |      | 1  |
| rs145747095             | 1 | 3021 | -1 |
| rs377295148             | 1 |      | 1  |
| rs6971720               | 1 |      | 1  |
| 4366,rs2234922,COSM37   | 1 |      | 1  |
| rs13439459,COSM376328   | 1 |      | 1  |
| rs16947425              | 1 |      | -1 |
| rs2272313               | 1 |      | 1  |
| rs10935282              | 1 |      | 1  |
| CM920244,rs1801591      | 1 |      | -1 |
| 426,COSM3721676,COSM    | 1 |      | -1 |
| rs3810381,COSM3749518   | 1 |      | -1 |
| rs41286811              | 1 |      | -1 |
| rs2307003               | 1 |      | 1  |
| rs12975442              | 1 |      | 1  |
| rs79643517              | 1 |      | -1 |
| rs1076871               | 1 |      | -1 |
|                         | 1 |      | 1  |
| rs5155,rs1047840,COSM10 | 1 |      | 1  |
|                         | 1 |      | 1  |
| rs56194802              | 1 |      | -1 |
| 800291,COSM3759433,C    | 1 |      | -1 |
| rs7058826               | 1 |      | -1 |
| 40655,CM940656,rs13785  | 1 |      | 1  |
| rs4030473               | 1 |      | 1  |
| rs174589                | 1 |      | 1  |
| rs174453                | 1 |      | -1 |
| rs733679                | 1 |      | 1  |
| rs6007594,COSM149314    | 1 |      | 1  |
|                         | 1 |      | 1  |
|                         | 1 |      | 1  |
| rs2475853               | 1 |      | -1 |
| rs62599865              | 1 |      | -1 |
| rs61703386              | 1 |      | -1 |
| rs41305290              | 1 |      | -1 |
| rs1939383               | 1 |      | -1 |

VEP annotated somatic variants

|                           |   |      |    |
|---------------------------|---|------|----|
| rs3780                    | 1 |      | -1 |
| rs3733577                 | 1 |      | -1 |
|                           | 1 |      | -1 |
| rs916668                  | 1 | 12   | -1 |
| rs2075566                 | 1 |      | -1 |
| rs10793625                | 1 |      | 1  |
| rs771204                  | 1 |      | -1 |
| rs9358802,COSM150059      | 1 |      | -1 |
| rs11555275                | 1 |      | 1  |
|                           | 1 |      | -1 |
| rs7757405                 | 1 |      | 1  |
| rs300377,FANCE:c.855+58A> | 1 |      | 1  |
| rs4713867,FANCE:c.387A>   | 1 |      | 1  |
| rs1052583                 | 1 |      | 1  |
| rs16843671                | 1 |      | 1  |
| rs2240482                 | 1 |      | 1  |
| rs341283365,COSM413084    | 1 |      | -1 |
| rs17848937                | 1 |      | -1 |
| rs17848935                | 1 |      | -1 |
| rs1127678                 | 1 | 3279 | -1 |
| rs190206480               | 1 |      | 1  |
| rs34167077                | 1 |      | -1 |
| rs4883569                 | 1 |      | 1  |
| rs2066913                 | 1 |      | 1  |
| rs10973387                | 1 |      | -1 |
| rs28401636                | 1 |      | -1 |
| rs553196851               | 1 |      | -1 |
| rs7630741                 | 1 |      | 1  |
|                           | 1 |      | -1 |
| rs11119925                | 1 |      | -1 |
| rs2287854,COSM4131434     | 1 |      | 1  |
| rs855,CM023917,COSM150    | 1 |      | 1  |
| rs1049636                 | 1 |      | -1 |
| rs1893433                 | 1 |      | 1  |
| rs3744903                 | 1 |      | 1  |
| rs1893434                 | 1 |      | 1  |
| rs774914442,rs2231901     | 1 |      | -1 |
|                           | 1 |      | 1  |
| rs56301507                | 1 |      | 1  |
| rs6704545                 | 1 |      | -1 |
| rs36051194,CM065185       | 1 |      | -1 |
| rs2177153                 | 1 |      | 1  |
| rs3214903                 | 1 |      | -1 |
| rs12122068                | 1 |      | 1  |
| rs6686353                 | 1 |      | 1  |
| rs18529,rs1800822,COSM14  | 1 |      | 1  |
| rs67450550,COSM244569     | 1 |      | -1 |
| rs7929014                 | 1 |      | -1 |
| rs294883                  | 1 |      | 1  |
| rs381639,COSM4160337      | 1 |      | 1  |
| rs2293783,COSM4003704     | 1 |      | 1  |
| rs4714489                 | 1 |      | 1  |
| rs10106                   | 1 |      | 1  |
| rs9,COSM4159210,COSM4     | 1 |      | 1  |
| rs35583270                | 1 |      | 1  |

VEP annotated somatic variants

|                        |   |    |    |
|------------------------|---|----|----|
| 94,COSM3760773,COSM    | 1 |    | 1  |
| rs17457087             | 1 |    | 1  |
| rs34505482             | 1 |    | 1  |
| rs1545437              | 1 |    | -1 |
| rs74123100             | 1 |    | -1 |
|                        | 1 |    | -1 |
| rs57337277             | 1 |    | -1 |
| rs117877479            | 1 |    | 1  |
| rs838137               | 1 |    | -1 |
| rs9807877              | 1 |    | -1 |
| rs529623               | 1 |    | -1 |
| rs1994490              | 1 |    | -1 |
| rs7617829              | 1 |    | -1 |
| rs1564281              | 1 |    | -1 |
| rs3830208              | 1 |    | -1 |
| rs12432149             | 1 |    | -1 |
| rs76999174             | 1 | 41 | -1 |
| rs76743658             | 1 |    | -1 |
| rs4958733              | 1 |    | 1  |
| rs2288101              | 1 |    | -1 |
| rs10849133,COSM112858  | 1 |    | 1  |
| rs1468556,COSM1179986  | 1 |    | 1  |
| rs16962977             | 1 |    | -1 |
| rs16962974             | 1 |    | -1 |
| rs35950532             | 1 |    | -1 |
|                        | 1 |    | 1  |
| rs3806338              | 1 |    | -1 |
| rs76346754             | 1 |    | -1 |
| rs61729628,COSM375144  | 1 |    | -1 |
| rs5384                 | 1 |    | 1  |
| rs71548508,COSM150047  | 1 |    | 1  |
| rs36,COSM3982916,COSM  | 1 |    | 1  |
| rs2293                 | 1 |    | 1  |
| rs9971293              | 1 |    | -1 |
| rs10136536             | 1 |    | 1  |
| rs181881694            | 1 |    | 1  |
| rs1254898              | 1 |    | -1 |
| rs11083455,COSM413177  | 1 |    | -1 |
| rs56854837             | 1 |    | -1 |
| rs79309130             | 1 |    | -1 |
| rs147513433            | 1 |    | 1  |
| rs6076347,COSM1410878  | 1 |    | 1  |
| rs2303275,COSM3755068  | 1 |    | -1 |
| rs2303278              | 1 |    | -1 |
| rs764963799            | 1 |    | 1  |
| rs1049346              | 1 |    | -1 |
| rs4907817              | 1 |    | -1 |
| rs12844618             | 1 |    | -1 |
| rs79806135             | 1 |    | -1 |
| rs11229655             | 1 |    | -1 |
| rs4852349              | 1 |    | 1  |
| rs1805058,COSM1130492  | 1 |    | 1  |
| rs49,COSM3759036,COSM  | 1 |    | -1 |
| rs4986942              | 1 |    | -1 |
| rs3M430787,COSM1628466 | 1 |    | -1 |

VEP annotated somatic variants

|                         |   |    |    |
|-------------------------|---|----|----|
| CR022116,rs2243093      | 1 |    | 1  |
| rs2274020,COSM147704    | 1 |    | 1  |
| rs2793442               | 1 |    | -1 |
|                         | 1 |    | -1 |
|                         | 1 |    | 1  |
| rs1190736,COSM415660    | 1 |    | -1 |
| rs4838684,COSM427276    | 1 |    | 1  |
| rs147825070             | 1 |    | 1  |
| rs11101914              | 1 |    | 1  |
| rs12219529              | 1 |    | 1  |
| rs77245879              | 1 |    | -1 |
| rs53,COSM3998282,COSM   | 1 |    | 1  |
| rs62265406              | 1 |    | 1  |
| rs2748338               | 1 |    | 1  |
| rs34212133              | 1 |    | 1  |
| rs116870369             | 1 |    | 1  |
|                         | 1 |    | 1  |
| rs3828595               | 1 | 11 | 1  |
| rs4475186               | 1 |    | 1  |
| rs41312596              | 1 |    | 1  |
| rs14002821,COSM400282   | 1 |    | 1  |
| rs34108640              | 1 |    | 1  |
| rs76463933              | 1 |    | 1  |
| rs974285                | 1 |    | 1  |
| rs757687772,rs1871042   | 1 |    | 1  |
| rs72681249              | 1 |    | 1  |
| rs12356612              | 1 |    | 1  |
| rs41260144              | 1 |    | 1  |
| rs616218                | 1 |    | -1 |
| rs1052278               | 1 |    | 1  |
| rs17676826              | 1 |    | -1 |
|                         | 1 |    | 1  |
| rs34922454              | 1 |    | -1 |
| rs6580637               | 1 |    | -1 |
|                         | 1 |    | 1  |
| rs2243388               | 1 |    | -1 |
| rs14156991,COSM415698   | 1 |    | -1 |
| rs56351858              | 1 |    | -1 |
| rs16833972              | 1 |    | -1 |
| rs3738541               | 1 |    | -1 |
| rs4720951,COSM416247    | 1 |    | 1  |
|                         | 1 |    | -1 |
|                         | 1 |    | -1 |
| rs12220588              | 1 |    | 1  |
| rs10882474              | 1 |    | 1  |
| rs2232253               | 1 |    | 1  |
|                         | 1 |    | -1 |
| rs1960827,COSM3761737,C | 1 |    | 1  |
| rs148714837             | 1 |    | -1 |
| rs74648342              | 1 |    | -1 |
| rs12436072              | 1 |    | 1  |
| rs12164                 | 1 |    | 1  |
|                         | 1 |    | -1 |
| rs16891397              | 1 |    | 1  |
| rs77463023              | 1 |    | -1 |



VEP annotated somatic variants

|                        |   |    |
|------------------------|---|----|
| rs3752419,COSM416043   | 1 | -1 |
| rs775476188            | 1 | 1  |
| rs3761983,COSM3761984, | 1 | 1  |
| rs2073420              | 1 | -1 |
| rs546127026            | 1 | -1 |
| rs1131488,COSM375217   | 1 | 1  |
| rs2272790              | 1 | 1  |
| rs1053593              | 1 | 1  |
| rs2071190              | 1 | 1  |
| rs77856552             | 1 | 1  |
| rs35337531             | 1 | -1 |
| rs3830343              | 1 | 1  |
| rs3737243              | 1 | 1  |
|                        | 1 | -1 |
| rs6320,COSM150432      | 1 | 1  |
| rs6638360              | 1 | -1 |
| rs200650762            | 1 | -1 |
| rs319,COSM149242,COSM  | 1 | -1 |
|                        | 1 | -1 |
| rs1048710              | 1 | -1 |
| rs540557518            | 1 | -1 |
| rs12904700             | 1 | 1  |
| rs866484               | 1 | 1  |
| rs051393,COSM4002001,C | 1 | 1  |
| rs33982004             | 1 | 1  |
| rs609207               | 1 | 1  |
| rs2297370              | 1 | 1  |
| rs2274849              | 1 | 1  |
| rs34297802             | 1 | 1  |
| rs1128617              | 1 | -1 |
| rs4830219,COSM146565   | 1 | -1 |
|                        | 1 | -1 |
| rs6782002              | 1 | -1 |
| rs36052974             | 1 | -1 |
| rs9848979              | 1 | -1 |
| rs61886896             | 1 | -1 |
| rs139927942            | 1 | -1 |
| rs1063110,COSM376350   | 1 | -1 |
| rs35444385,rs57179462  | 1 | 1  |
| rs146644651            | 1 | -1 |
| rs41268137             | 1 | -1 |
| rs12722600             | 1 | -1 |
| rs143249661            | 1 | 1  |
| CR032720,rs3842752     | 1 | -1 |
| rs3741211,CS012210     | 1 | -1 |
| rs2059806,COSM148469,C | 1 | -1 |
| rs2860177              | 1 | -1 |
| rs11761394             | 1 | -1 |
|                        | 1 | -1 |
|                        | 1 | -1 |
| rs3797390              | 1 | 1  |
| rs768211373            | 1 | -1 |
| rs2291919              | 1 | 1  |
| rs75282194             | 1 | 1  |
| rs34051422             | 1 | 1  |

VEP annotated somatic variants

|                        |   |    |
|------------------------|---|----|
| rs1109216              | 1 | 1  |
| rs2274617              | 1 | 1  |
| rs2305586              | 1 | 1  |
| rs3821909              | 1 | 1  |
| rs2239547,CR117967     | 1 | -1 |
| rs2276817              | 1 | -1 |
| rs2240917              | 1 | -1 |
| rs1751134              | 1 | -1 |
| rs41307668             | 1 | -1 |
| rs7957289              | 1 | -1 |
|                        | 1 | -1 |
| rs78399616             | 1 | 1  |
| rs34043167             | 1 | -1 |
| rs2298681              | 1 | 1  |
| rs2073366              | 1 | 1  |
| rs11098988             | 1 | 1  |
| rs5952987              | 1 | 1  |
| rs9419380              | 1 | 1  |
| rs13214720             | 1 | 1  |
| rs2076056              | 1 | 1  |
| rs742099,COSM3761611   | 1 | 1  |
| rs10545425             | 1 | 1  |
| rs17369029             | 1 | 1  |
| rs41289438             | 1 | -1 |
| rs17855078             | 1 | -1 |
| rs10889315,COSM426544  | 1 | -1 |
| rs9800580,COSM3761529  | 1 | -1 |
| rs1611775              | 1 | -1 |
|                        | 1 | 1  |
| rs16885430             | 1 | 1  |
| rs12706859             | 1 | -1 |
| rs80095910             | 1 | -1 |
| rs9534059              | 1 | -1 |
| rs41300795             | 1 | 1  |
|                        | 1 | 1  |
| rs141093070            | 1 | 1  |
|                        | 1 | -1 |
| rs13759496,COSM3759497 | 1 | 1  |
| rs59225858             | 1 | -1 |
| rs1062277,COSM3762429  | 1 | -1 |
| rs6950119,COSM321080   | 1 | -1 |
| rs11913944,COSM400219  | 1 | -1 |
| rs68107102             | 1 | 1  |
| rs111,COSM4003699,COSM | 1 | 1  |
| rs147073742            | 1 | -1 |
| rs138496842            | 1 | -1 |
| rs757731918            | 1 | 1  |
| rs114902761            | 1 | -1 |
| rs12046928             | 1 | -1 |
| rs72852205             | 1 | 1  |
|                        | 1 | -1 |
|                        | 1 | 1  |
|                        | 1 | 1  |
| rs16862956             | 1 | -1 |
| rs3736968              | 1 | -1 |

VEP annotated somatic variants

|                         |   |    |
|-------------------------|---|----|
| rs11552577              | 1 | -1 |
| rs202185247             | 1 | 1  |
|                         | 1 | -1 |
|                         | 1 | 1  |
| rs149140699             | 1 | -1 |
| rs9418941               | 1 | 1  |
| rs7307735               | 1 | 1  |
| rs10953283,COSM376291   | 1 | -1 |
| rs190427523             | 1 | 1  |
| rs34946378              | 1 | 1  |
| rs543603727             | 1 | -1 |
| rs2604958               | 1 | -1 |
| rs2071602               | 1 | -1 |
| rs463217                | 1 | 1  |
| rs9306112               | 1 | 1  |
| rs9984726,COSM413503    | 1 | -1 |
| rs73176644              | 1 | 1  |
| rs3841288               | 1 | 1  |
| rs6600,LAMA2:c.284-85de | 1 | 1  |
| rs9374309               | 1 | -1 |
| rs6908219               | 1 | -1 |
| rs2296300               | 1 | 1  |
| rs6672093               | 1 | 1  |
| rs2296299               | 1 | 1  |
| rs684527                | 1 | 1  |
| rs13761532,COSM3761534  | 1 | -1 |
|                         | 1 | 1  |
|                         | 1 | -1 |
| rs6695528               | 1 | 1  |
| rs11610822              | 1 | 1  |
| rs893239                | 1 | 1  |
| rs36068997              | 1 | -1 |
| rs575867042             | 1 | 1  |
| rs7258841               | 1 | -1 |
|                         | 1 | -1 |
| rs7334674               | 1 | 1  |
|                         | 1 | 1  |
|                         | 1 | -1 |
| rs3813933               | 1 | 1  |
| rs182548747             | 1 | 1  |
| rs750695318,rs2304720   | 1 | 1  |
| rs9877192               | 1 | 1  |
| rs10771166              | 1 | 1  |
| rs13387241              | 1 | -1 |
| rs2242339               | 1 | 1  |
| rs138879160             | 1 | -1 |
| rs139839409             | 1 | -1 |
| rs1741547               | 1 | -1 |
| rs2354444               | 1 | 1  |
| rs7094610               | 1 | -1 |
| rs78140568              | 1 | 1  |
|                         | 1 | 1  |
| rs34423045,COSM375996   | 1 | -1 |
| rs36006556              | 1 | 1  |
| rs7745                  | 1 | 1  |

VEP annotated somatic variants

|                          |   |      |    |
|--------------------------|---|------|----|
| rs2839146                | 1 |      | -1 |
| rs2274800                | 1 |      | -1 |
| rs75340045               | 1 |      | 1  |
| rs4130852                | 1 |      | -1 |
| rs41308397               | 1 |      | -1 |
| rs807023                 | 1 | 2489 | 1  |
| rs752974                 | 1 |      | 1  |
| rs73048940               | 1 |      | -1 |
| rs2908989                | 1 |      | -1 |
| rs2070945                | 1 |      | -1 |
| rs2233055                | 1 |      | -1 |
| rs770941569              | 1 |      | 1  |
| rs5953637                | 1 |      | 1  |
| rs3765272,COSM415663     | 1 |      | -1 |
|                          | 1 |      | 1  |
|                          | 1 |      | 1  |
| rs113311895,COSM41566    | 1 |      | 1  |
| rs2142887                | 1 |      | -1 |
| rs6894260                | 1 |      | 1  |
| rs2301796,COSM448019     | 1 |      | 1  |
|                          | 1 |      | 1  |
| rs5909299,COSM415676     | 1 |      | -1 |
| rs74430817               | 1 |      | 1  |
| rs56072295               | 1 |      | -1 |
| rs55715763               | 1 |      | 1  |
| rs72288687               | 1 |      | 1  |
| rs2290689                | 1 |      | 1  |
| rs34,COSM4131225,COSM    | 1 |      | 1  |
| rs4502771                | 1 |      | 1  |
| rs38,COSM3749709,COSM    | 1 |      | -1 |
| rs2270969                | 1 |      | -1 |
| rs2250213                | 1 |      | -1 |
| rs70,COSM4161135,COSM    | 1 |      | -1 |
|                          | 1 |      | -1 |
|                          | 1 |      | -1 |
| rs751446,RettdBASE_c.942 | 1 |      | -1 |
|                          | 1 |      | -1 |
| rs616836                 | 1 |      | -1 |
| rs3745480                | 1 |      | 1  |
| rs147500056,COSM37361    | 1 |      | 1  |
|                          | 1 |      | -1 |
| rs368622121              | 1 |      | -1 |
| rs673408                 | 1 |      | 1  |
| rs147500027              | 1 |      | 1  |
| rs1263792                | 1 |      | -1 |
| rs13023973               | 1 |      | -1 |
| rs878493                 | 1 |      | -1 |
| rs8081793                | 1 |      | 1  |
| rs8067585                | 1 |      | 1  |
| rs79286496               | 1 |      | 1  |
| rs197841,COSM3997843,C   | 1 |      | 1  |
| rs3213927                | 1 |      | -1 |
| rs2289718                | 1 |      | -1 |
| rs3747032                | 1 |      | -1 |
| rs73492943               | 1 |      | -1 |

VEP annotated somatic variants

|                        |   |    |
|------------------------|---|----|
| rs142531662            | 1 | 1  |
| rs2302320              | 1 | 1  |
| rs7964786              | 1 | 1  |
| rs10489691             | 1 | 1  |
| rs2227261              | 1 | -1 |
| rs7922546              | 1 | -1 |
| rs77813062             | 1 | -1 |
| rs141042584            | 1 | -1 |
| rs12012022             | 1 | -1 |
| rs6622126              | 1 | -1 |
| rs6495341              | 1 | 1  |
| rs1793141              | 1 | -1 |
| rs496797               | 1 | -1 |
| rs13997590,COSM399759  | 1 | 1  |
| rs13747021,COSM3747022 | 1 | 1  |
| rs14144097,COSM4144099 | 1 | 1  |
| rs3809869              | 1 | -1 |
|                        | 1 | 1  |
| rs181211282            | 1 | -1 |
| rs34547023             | 1 | -1 |
| rs11042902             | 1 | -1 |
|                        | 1 | 1  |
| rs12501541             | 1 | 1  |
| rs11121691,COSM399674  | 1 | -1 |
| rs2229276,COSM3751028  | 1 | 1  |
| rs3820571              | 1 | 1  |
| rs3820568              | 1 | 1  |
| rs2297965              | 1 | 1  |
| rs34883891             | 1 | 1  |
| rs111427194            | 1 | -1 |
| rs139,COSM4132886,COSM | 1 | -1 |
| rs10878538,COSM160605  | 1 | 1  |
| rs3751175              | 1 | 1  |
| rs7480563,COSM428399   | 1 | 1  |
| rs12935454             | 1 | -1 |
| rs135,COSM3759478,COSM | 1 | -1 |
| rs4796854,COSM437809   | 1 | -1 |
| rs11570050,rs181840234 | 1 | -1 |
| rs94,COSM3999723,COSM  | 1 | -1 |
| rs3957557              | 1 | -1 |
| rs735711,COSM3753909   | 1 | -1 |
|                        | 1 | -1 |
| rs7159367              | 1 | -1 |
| rs772285227            | 1 | -1 |
| rs40305                | 1 | -1 |
|                        | 1 | 1  |
| rs2072012              | 1 | 1  |
| rs72818342             | 1 | -1 |
| rs10408143             | 1 | -1 |
|                        | 1 | -1 |
| rs56397652             | 1 | 1  |
| rs4950877              | 1 | -1 |
| rs145701607            | 1 | 1  |
| rs174536               | 1 | 1  |
|                        | 1 | -1 |

VEP annotated somatic variants

|                        |   |    |    |
|------------------------|---|----|----|
|                        | 1 |    | 1  |
| rs2275107,COSM3763760  | 1 |    | -1 |
|                        | 1 | 47 | -1 |
| rs11670727             | 1 |    | -1 |
| rs878907               | 1 |    | -1 |
| rs1318102              | 1 |    | -1 |
| rs11657883,COSM148287  | 1 |    | 1  |
| rs35995789             | 1 |    | 1  |
| rs11653231             | 1 |    | 1  |
| rs228603,COSM439006,C  | 1 |    | 1  |
| rs73044244             | 1 |    | 1  |
| rs375430154            | 1 |    | -1 |
| rs114443303            | 1 |    | 1  |
| rs6087625              | 1 |    | -1 |
| rs1079533              | 1 |    | -1 |
| rs1136207              | 1 |    | 1  |
|                        | 1 |    | -1 |
| rs6433569              | 1 |    | -1 |
| rs4300824              | 1 |    | -1 |
| rs70,COSM4158999,COSM  | 1 |    | -1 |
| rs4804                 | 1 |    | 1  |
| rs2275712              | 1 |    | 1  |
| rs201763096            | 1 |    | 1  |
| rs4648073              | 1 |    | 1  |
|                        | 1 |    | 1  |
| rs587555               | 1 |    | 1  |
| rs115931931,COSM132919 | 1 |    | -1 |
| rs10457670             | 1 |    | -1 |
|                        | 1 |    | -1 |
|                        | 1 |    | -1 |
|                        | 1 |    | 1  |
| rs6860507              | 1 |    | 1  |
|                        | 1 |    | 1  |
| rs456285               | 1 |    | -1 |
| rs149560096            | 1 |    | 1  |
| rs61755040             | 1 |    | -1 |
| rs2233442              | 1 |    | 1  |
| rs376045897            | 1 |    | -1 |
| rs17646552             | 1 |    | 1  |
| rs61732213,COSM375729  | 1 |    | 1  |
| rs74763333             | 1 |    | 1  |
| rs117307800            | 1 |    | -1 |
| rs11246947             | 1 |    | 1  |
| rs10813983             | 1 |    | -1 |
| rs1263337              | 1 |    | -1 |
| rs11553611             | 1 |    | 1  |
| rs905721               | 1 |    | 1  |
| CM981388,rs1799983     | 1 |    | 1  |
|                        | 1 |    | 1  |
| rs12344155             | 1 |    | -1 |
| rs11574894             | 1 |    | -1 |
| rs217434               | 1 |    | -1 |
| rs34,COSM3765512,COSM  | 1 |    | -1 |
| rs727162,CM1110386     | 1 |    | 1  |

VEP annotated somatic variants

|                                      |   |      |    |
|--------------------------------------|---|------|----|
|                                      | 1 |      | 1  |
| rs7644275                            | 1 |      | 1  |
| rs773872527                          | 1 | 255  | -1 |
| rs144139217                          | 1 |      | -1 |
| rs28932181                           | 1 |      | 1  |
| rs2303707                            | 1 |      | -1 |
| rs142803792                          | 1 |      | -1 |
| rs79891871                           | 1 | 4704 | -1 |
| rs11550029,COSM45311                 | 1 |      | -1 |
| rs1175392                            | 1 |      | -1 |
| rs10093400                           | 1 |      | -1 |
|                                      | 1 |      | 1  |
| rs11244329                           | 1 |      | 1  |
| rs10872646,COSM416027                | 1 |      | -1 |
| rs141363348                          | 1 |      | 1  |
| rs10567712                           | 1 |      | -1 |
| rs7657846,COSM400314                 | 1 |      | -1 |
| rs1806222                            | 1 |      | -1 |
| rs748486                             | 1 |      | -1 |
| rs1029305                            | 1 |      | -1 |
| rs2027833                            | 1 |      | -1 |
| rs202009336,rs2027831                | 1 |      | -1 |
| rs2027832                            | 1 |      | -1 |
| rs2295478                            | 1 |      | -1 |
| rs2294695                            | 1 |      | -1 |
| rs510,COSM3718591,COSM3718591        | 1 |      | -1 |
| rs11903                              | 1 |      | -1 |
| rs3826861                            | 1 |      | -1 |
| rs1025576                            | 1 |      | -1 |
| rs1025576,TMP_ESP_17_3195503_1025576 | 1 |      | -1 |
| rs7121804                            | 1 |      | 1  |
| rs61890335                           | 1 |      | -1 |
| rs56352135                           | 1 | 16   | 1  |
| rs12283334,COSM399844                | 1 |      | -1 |
| rs10838637,COSM399848                | 1 |      | -1 |
| rs7145814,COSM375386                 | 1 |      | -1 |
| rs115424559,COSM15670                | 1 |      | 1  |
| rs4465383                            | 1 |      | -1 |
| rs74782118                           | 1 |      | 1  |
| rs2297594                            | 1 |      | 1  |
| rs733728                             | 1 |      | 1  |
| rs173776,COSM4129428                 | 1 |      | 1  |
|                                      | 1 |      | 1  |
| rs57131062                           | 1 |      | -1 |
| rs148216086                          | 1 |      | 1  |
| rs1152187                            | 1 |      | -1 |
| rs2070871,COSM400035                 | 1 |      | -1 |
|                                      | 1 |      | -1 |
| rs55701638                           | 1 |      | 1  |
| rs5914274                            | 1 |      | 1  |
| rs10408458                           | 1 |      | 1  |
| rs62620049                           | 1 |      | -1 |
| rs11185826,COSM375203                | 1 |      | -1 |
| rs7535528,COSM374688                 | 1 |      | -1 |
| rs760781025                          | 1 |      | 1  |

VEP annotated somatic variants

|                      |   |      |    |
|----------------------|---|------|----|
| rs11577368           | 1 |      | -1 |
| M3752215,COSM375221  | 1 |      | 1  |
| rs41302597           | 1 |      | 1  |
| rs13007173           | 1 |      | -1 |
| 36,COSM4003697,COSM  | 1 |      | -1 |
| rs3812657            | 1 |      | -1 |
| 766854336,COSM346947 | 1 |      | -1 |
| rs12707531           | 1 |      | -1 |
| s4816,COSM3761539,CC | 1 |      | 1  |
| rs78561636           | 1 |      | 1  |
| s2241988,COSM4158259 | 1 |      | 1  |
| rs74436253           | 1 | 142  | -1 |
| 13710427,COSM3710429 | 1 |      | -1 |
| s1131978,COSM3752059 | 1 |      | 1  |
|                      | 1 |      | 1  |
| rs246388,COSM149993  | 1 |      | -1 |
| rs246391,COSM149994  | 1 |      | -1 |
| rs1780192            | 1 |      | 1  |
| rs4985155            | 1 |      | 1  |
| rs2740               | 1 | 556  | 1  |
| rs34125357           | 1 | 1739 | -1 |
| 30,COSM3999606,COSM  | 1 |      | -1 |
| rs6676171            | 1 |      | 1  |
| rs12407843           | 1 |      | 1  |
| s6671392,COSM3677414 | 1 |      | 1  |
| rs17570,COSM3756628  | 1 |      | -1 |
| rs1061338            | 1 |      | -1 |
| rs2306304            | 1 |      | 1  |
| rs2306301            | 1 |      | 1  |
|                      | 1 |      | -1 |
| rs17303413           | 1 |      | 1  |
| 47,COSM3756392,COSM  | 1 |      | -1 |
| rs3006473            | 1 |      | -1 |
| rs3750354            | 1 |      | 1  |
|                      | 1 |      | -1 |
|                      | 1 |      | -1 |
|                      | 1 |      | 1  |
| 61,COSM3998492,COSM  | 1 |      | 1  |
| rs1668               | 1 |      | 1  |
| rs7531782            | 1 |      | -1 |
| rs17714063           | 1 |      | -1 |
| rs72818370           | 1 |      | 1  |
| rs4791765            | 1 |      | -1 |
|                      | 1 |      | 1  |
| s11541025,COSM375928 | 1 |      | 1  |
| rs5751975            | 1 |      | -1 |
| rs3761646            | 1 |      | -1 |
| rs734823             | 1 |      | -1 |
| rs9370067            | 1 |      | -1 |
| rs7967264            | 1 |      | -1 |
|                      | 1 |      | -1 |
| rs2020923            | 1 |      | -1 |
|                      | 1 |      | 1  |
| rs3740365            | 1 |      | 1  |
| rs10786156           | 1 |      | 1  |



VEP annotated somatic variants

|                       |   |    |
|-----------------------|---|----|
| rs3831084             | 1 | 1  |
| CM105437,rs3765524    | 1 | 1  |
| rs4072830             | 1 | 1  |
| rs12727342            | 1 | 1  |
| rs10752744            | 1 | 1  |
| 70,COSM3763171,COSM   | 1 | -1 |
| 13,COSM3763186,COSM   | 1 | -1 |
| rs1065837             | 1 | -1 |
| 33,COSM3763134,COSM   | 1 | -1 |
| 09,COSM3763110,COSM   | 1 | -1 |
| 35,COSM3763122,COSM   | 1 | -1 |
|                       | 1 | -1 |
| rs6573782             | 1 | 1  |
| rs1555400             | 1 | 1  |
| rs749271              | 1 | 1  |
| rs28687780            | 1 | 1  |
| rs139924905           | 1 | 1  |
| rs3744078             | 1 | -1 |
| rs55709850            | 1 | -1 |
|                       | 1 | -1 |
| M3762011,COSM376201   | 1 | 1  |
| rs2294917             | 1 | 1  |
| 38,COSM3749575,COSM   | 1 | 1  |
| 12_89919631_89919632, | 1 | -1 |
|                       | 1 | 1  |
|                       | 1 | 1  |
| rs2424213             | 1 | 1  |
| rs7986347             | 1 | -1 |
| 88,COSM3834038,COSM   | 1 | 1  |
| rs1801282,CM981614    | 1 | 1  |
| 4587,rs3856806,COSM40 | 1 | 1  |
| rs1669112             | 1 | 1  |
| 201186780,COSM174549  | 1 | 1  |
| rs2301287             | 1 | 1  |
| rs34856581            | 1 | -1 |
| rs7894                | 1 | 1  |
| rs113986045           | 1 | 1  |
| rs741932              | 1 | 1  |
| rs2136998             | 1 | -1 |
| rs11099079            | 1 | 1  |
| rs496067              | 1 | 1  |
| rs201600914,rs513572  | 1 | 1  |
| rs513573              | 1 | 1  |
| rs880177              | 1 | -1 |
| rs12544121            | 1 | 1  |
| rs3741089             | 1 | -1 |
|                       | 1 | 1  |
| rs45596236            | 1 | 1  |
| rs67531107            | 1 | 1  |
| rs384726              | 1 | 1  |
|                       | 1 | -1 |
| rs141874203           | 1 | -1 |
| rs3761484             | 1 | 1  |
| rs9626578             | 1 | 1  |
| rs150305650           | 1 | -1 |

VEP annotated somatic variants

|                        |   |    |
|------------------------|---|----|
| rs550887876            | 1 | -1 |
| rs144556615            | 1 | -1 |
| rs59007873             | 1 | -1 |
| rs2072284              | 1 | -1 |
| rs62086002             | 1 | -1 |
| rs2142111              | 1 | -1 |
| rs3809916              | 1 | 1  |
| rs2273786              | 1 | -1 |
| rs41282874             | 1 | 1  |
|                        | 1 | 1  |
| rs3821880              | 1 | 1  |
| rs4341027              | 1 | -1 |
| rs17853260,COSM452796  | 1 | -1 |
| rs12928073             | 1 | -1 |
| rs116992433            | 1 | -1 |
| rs117568247            | 1 | -1 |
| rs138666431            | 1 | -1 |
| rs201905426            | 1 | -1 |
|                        | 1 | -1 |
| rs765051702,rs2058464  | 1 | 1  |
| rs3744619              | 1 | 1  |
| rs3751112,COSM3736249  | 1 | -1 |
| rs3812730              | 1 | -1 |
| rs1626469              | 1 | 1  |
| rs11871517             | 1 | 1  |
| rs14193                | 1 | -1 |
| rs145796187            | 1 | 1  |
| rs17783124             | 1 | 1  |
| rs2306919,COSM3723307  | 1 | -1 |
| rs3729931              | 1 | -1 |
| rs533403212            | 1 | 1  |
| rs1767443              | 1 | -1 |
| rs10875687             | 1 | -1 |
| rs776781597,rs34729771 | 1 | -1 |
| rs201983107            | 1 | -1 |
| rs367680909            | 1 | 1  |
| rs9530901              | 1 | -1 |
| rs2963925              | 1 | 1  |
| rs7813046              | 1 | 1  |
| rs11788747,COSM376392  | 1 | 1  |
| rs150557566            | 1 | 1  |
| rs6899737              | 1 | -1 |
| rs5851607,COSM1318744  | 1 | -1 |
| rs465736               | 1 | 1  |
| rs11242                | 1 | -1 |
| rs2581786              | 1 | -1 |
| rs1546650              | 1 | -1 |
| rs1549168              | 1 | -1 |
| rs2275742,COSM146839   | 1 | -1 |
| rs2272805              | 1 | 1  |
| rs32,COSM1751658,COSM  | 1 | -1 |
| rs3840984              | 1 | 1  |
| rs76239019             | 1 | 1  |
| rs55668927             | 1 | 1  |
| COSM3360533            | 1 | -1 |

VEP annotated somatic variants

|                          |   |      |    |
|--------------------------|---|------|----|
| rs12944458               | 1 |      | 1  |
| rs374247435,rs33952548   | 1 |      | -1 |
| rs144040326              | 1 |      | -1 |
|                          | 1 |      | -1 |
| rs9864412                | 1 |      | -1 |
| rs967454                 | 1 |      | -1 |
| rs11208364               | 1 |      | -1 |
| rs1535330                | 1 |      | -1 |
| rs193084032              | 1 |      | -1 |
| rs2224797,rs111914364    | 1 | 4471 | 1  |
| rs7900838                | 1 | 3588 | 1  |
| rs7968684                | 1 |      | -1 |
| rs486089                 | 1 | 1111 | -1 |
| rs7136561                | 1 |      | -1 |
| rs12947988               | 1 |      | -1 |
| rs73020697               | 1 |      | 1  |
|                          | 1 |      | 1  |
|                          | 1 |      | 1  |
| rs6509,COSM3759202       | 1 |      | -1 |
| rs7580,COSM1469302       | 1 |      | -1 |
| rs6932660                | 1 |      | -1 |
| rs7217786                | 1 |      | 1  |
| rs2271603,COSM437758     | 1 |      | 1  |
| rs2838344                | 1 |      | 1  |
| rs2155722,COSM149238     | 1 |      | 1  |
| rs7210579,COSM1384222    | 1 |      | 1  |
| rs3765595                | 1 |      | -1 |
| rs542998                 | 1 |      | 1  |
| rs12658664               | 1 |      | 1  |
| rs92,COSM1620146,COSM    | 1 |      | 1  |
| rs7098448                | 1 | 58   | -1 |
| rs1805343                | 1 |      | 1  |
| rs52,RYR1:c.3456C>T,COSM | 1 |      | 1  |
| rs745843,RYR1:c.270+27G  | 1 |      | 1  |
| rs75181912               | 1 |      | 1  |
| rs777579024              | 1 |      | 1  |
| rs10754602               | 1 |      | 1  |
| rs791541                 | 1 |      | 1  |
| rs41279198               | 1 |      | 1  |
| rs11147974               | 1 |      | 1  |
|                          | 1 |      | -1 |
| rs11763269,rs56059694    | 1 |      | -1 |
| rs1053744                | 1 |      | -1 |
| rs11042500               | 1 |      | -1 |
| rs776039654              | 1 |      | 1  |
| rs1142287,COSM4142788    | 1 |      | -1 |
| rs882745                 | 1 |      | -1 |
|                          | 1 |      | 1  |
| rs572,COSM452260,COSM    | 1 |      | 1  |
| rs35006492               | 1 |      | -1 |
| rs167618                 | 1 |      | -1 |
| rs1546961                | 1 | 2    | -1 |
| rs3731760                | 1 |      | -1 |
| rs1CM051623,rs6746030    | 1 |      | -1 |

VEP annotated somatic variants

|                       |   |    |    |
|-----------------------|---|----|----|
| rs10180721            | 1 |    | -1 |
| rs73100512            | 1 | 97 | -1 |
| rs3801066             | 1 |    | 1  |
| rs530168313           | 1 |    | -1 |
| rs9608973             | 1 |    | -1 |
| rs6695715             | 1 |    | -1 |
| rs2273526,COSM375846  | 1 |    | 1  |
| rs2303513             | 1 |    | -1 |
| rs3830973             | 1 |    | -1 |
| rs3750630             | 1 |    | -1 |
| rs3763695,COSM414428  | 1 |    | -1 |
| rs9420792             | 1 |    | -1 |
| rs117852708           | 1 |    | 1  |
| rs61738919,COSM376622 | 1 |    | -1 |
| rs5362                | 1 |    | -1 |
| rs17522707            | 1 |    | -1 |
| rs1990044             | 1 |    | -1 |
| rs17241389            | 1 |    | -1 |
| rs6446202             | 1 |    | 1  |
| rs1062753             | 1 |    | 1  |
| rs9323910             | 1 |    | 1  |
| rs268686              | 1 |    | -1 |
|                       | 1 |    | 1  |
|                       | 1 |    | 1  |
|                       | 1 |    | 1  |
| rs35377445,COSM375909 | 1 |    | 1  |
| rs7197262             | 1 |    | 1  |
| rs147508693           | 1 |    | -1 |
| rs3998628             | 1 |    | 1  |
| rs2429908             | 1 |    | 1  |
| rs2447099             | 1 |    | 1  |
| rs143734853           | 1 |    | 1  |
| rs7805                | 1 | 2  | 1  |
| rs3740471,COSM375151  | 1 |    | -1 |
| rs187882127           | 1 |    | -1 |
| rs41275786            | 1 |    | -1 |
| rs1233555             | 1 |    | -1 |
| rs199645557,COSM39740 | 1 |    | 1  |
| rs3810108             | 1 |    | -1 |
|                       | 1 |    | -1 |
| rs9982519             | 1 |    | 1  |
| rs12145798            | 1 |    | -1 |
| rs11581248            | 1 |    | 1  |
| rs779111224           | 1 |    | 1  |
| rs13106574,COSM376079 | 1 |    | -1 |
|                       | 1 |    | -1 |
| rs11976455            | 1 |    | -1 |
| rs6647476,COSM458039  | 1 |    | 1  |
| rs2269914             | 1 |    | -1 |
| rs11668879            | 1 |    | -1 |
| rs35,COSM4005840,COSM | 1 |    | 1  |
|                       | 1 |    | -1 |
| rs941650              | 1 |    | 1  |
|                       | 1 |    | -1 |
| rs12942600            | 1 |    | -1 |

VEP annotated somatic variants

|                        |   |    |
|------------------------|---|----|
| rs112153156            | 1 | -1 |
| rs145107782            | 1 | 1  |
| rs4980349              | 1 | 1  |
|                        | 1 | 1  |
| rs41302651             | 1 | 1  |
| rs34664116             | 1 | -1 |
| rs205966               | 1 | 1  |
| rs35870005             | 1 | 1  |
| rs948270               | 1 | 1  |
| rs78020607             | 1 | 1  |
|                        | 1 | -1 |
| rs2288998              | 1 | -1 |
| rs12703112             | 1 | 1  |
| rs4808709              | 1 | 1  |
| rs10521578             | 1 | 1  |
| rs2278405              | 1 | -1 |
| rs6354                 | 1 | -1 |
| rs2248253              | 1 | -1 |
| rs1569951              | 1 | -1 |
| rs17183863,COSM399922  | 1 | -1 |
| rs1056846,COSM415685   | 1 | -1 |
|                        | 1 | -1 |
|                        | 1 | -1 |
|                        | 1 | 1  |
| rs11090629             | 1 | -1 |
| rs109,COSM3754066,COSM | 1 | 1  |
| rs917208               | 1 | 1  |
| rs12065652             | 1 | -1 |
|                        | 1 | -1 |
| rs1544402              | 1 | 1  |
| rs10754367             | 1 | -1 |
| rs12142616             | 1 | -1 |
| rs5908761              | 1 | -1 |
|                        | 1 | 1  |
| rs875097               | 1 | 1  |
|                        | 1 | 1  |
| rs11548457,COSM375674  | 1 | 1  |
| rs124,COSM3751948,COSM | 1 | -1 |
|                        | 1 | -1 |
| rs58090119             | 1 | -1 |
| rs117804715            | 1 | 1  |
| rs12536873             | 1 | 1  |
| rs55776327             | 1 | 1  |
| rs1008335              | 1 | 1  |
|                        | 1 | -1 |
| rs139731922            | 1 | -1 |
|                        | 1 | -1 |
| rs7207173              | 1 | -1 |
|                        | 1 | -1 |
| rs697210               | 1 | 1  |
|                        | 1 | 1  |
| rs11556615,COSM376069  | 1 | 1  |
|                        | 1 | 1  |
| rs557622174            | 1 | -1 |
|                        | 1 | -1 |

VEP annotated somatic variants

|                       |   |      |    |
|-----------------------|---|------|----|
| rs3780015             | 1 |      | -1 |
| rs10851866            | 1 |      | -1 |
| rs3934983             | 1 |      | -1 |
| rs58802664            | 1 | 84   | 1  |
| ,TMP_ESP_9_12593215   | 1 |      | -1 |
| rs1834                | 1 |      | 1  |
| rs34275118            | 1 |      | 1  |
| rs41285881            | 1 |      | 1  |
| rs3759259             | 1 |      | -1 |
|                       | 1 | 1702 | -1 |
|                       | 1 |      | 1  |
| s13050872,COSM376667  | 1 |      | -1 |
| .2118,rs237025,COSM40 | 1 |      | 1  |
| rs4803244             | 1 |      | 1  |
| rs1529733             | 1 |      | 1  |
| rs4341217             | 1 |      | 1  |
| rs1390679             | 1 |      | 1  |
| rs1132645             | 1 |      | -1 |
|                       | 1 |      | 1  |
| s33976862,COSM14779   | 1 |      | 1  |
| rs74413846            | 1 |      | 1  |
| rs1744177             | 1 |      | 1  |
| rs3743244             | 1 |      | 1  |
| M3760355,COSM376035   | 1 |      | 1  |
| rs3734296             | 1 |      | 1  |
| rs237028              | 1 |      | 1  |
| s17680881,COSM376048  | 1 |      | 1  |
| rs3788764             | 1 |      | -1 |
| rs2073138             | 1 |      | -1 |
| rs35105682            | 1 |      | -1 |
| rs572705              | 1 |      | -1 |
| rs606511              | 1 |      | -1 |
| rs394558              | 1 |      | 1  |
| rs3217211             | 1 |      | 1  |
| rs146025212           | 1 |      | 1  |
| rs9573565             | 1 |      | -1 |
| rs1138454             | 1 |      | -1 |
|                       | 1 |      | -1 |
| rs59223436            | 1 |      | -1 |
| s5944856,COSM375931   | 1 |      | 1  |
|                       | 1 |      | 1  |
| rs10044956            | 1 |      | 1  |
| rs12169610            | 1 |      | 1  |
| s11851097,COSM14784   | 1 |      | 1  |
| rs530289129           | 1 |      | -1 |
|                       | 1 |      | 1  |
| rs251796              | 1 |      | -1 |
|                       | 1 |      | 1  |
| rs302858              | 1 |      | -1 |
| rs118141221           | 1 |      | -1 |
| s12857479,COSM375363  | 1 |      | 1  |
| rs324356,COSM3761619  | 1 |      | -1 |
| s199687528,COSM7295   | 1 |      | -1 |
| rs12609379            | 1 |      | -1 |
| rs11165376            | 1 |      | -1 |

VEP annotated somatic variants

|                         |   |    |
|-------------------------|---|----|
| rs2290380,COSM375955    | 1 | 1  |
| rs513970                | 1 | -1 |
| rs6605530               | 1 | -1 |
| rs3214576               | 1 | -1 |
| rs2074603               | 1 | -1 |
|                         | 1 | 1  |
|                         | 1 | -1 |
|                         | 1 | -1 |
| rs41284222              | 1 | 1  |
| rs2292151,COSM3764756   | 1 | -1 |
|                         | 1 | 1  |
| rs200152166             | 1 | -1 |
| rs2279322               | 1 | -1 |
|                         | 1 | -1 |
| rs78,COSM3956876,COSM   | 1 | -1 |
| rs8036209               | 1 | -1 |
|                         | 1 | 1  |
| rs2291822,COSM4002988   | 1 | 1  |
| rs77173980              | 1 | -1 |
| rs12252784              | 1 | -1 |
| rs61741039              | 1 | -1 |
| rs144703742             | 1 | 1  |
|                         | 1 | 1  |
| rs76116020              | 1 | -1 |
| rs895438                | 1 | -1 |
| rs3800592               | 1 | 1  |
| rs2276884               | 1 | -1 |
| rs5936308               | 1 | -1 |
|                         | 1 | 1  |
| rs147529920             | 1 | -1 |
| rs12646286              | 1 | -1 |
| rs661561                | 1 | 1  |
| rs3181195,COSM4163270   | 1 | -1 |
| rs3762758,COSM376275    | 1 | -1 |
| rs34377860              | 1 | -1 |
| rs2290207,COSM3755468   | 1 | -1 |
| rs17475,rs560191,COSM37 | 1 | -1 |
| rs7476,rs2602141,COSM37 | 1 | -1 |
| rs16957730              | 1 | -1 |
| rs1045781               | 1 | -1 |
|                         | 1 | 1  |
| rs1697964               | 1 | -1 |
| rs1697963,COSM1438470   | 1 | -1 |
|                         | 1 | 1  |
| rs10410833              | 1 | -1 |
| rs9322994               | 1 | -1 |
| rs12147991              | 1 | -1 |
| rsCM065497,rs2295275    | 1 | -1 |
| rs3020967               | 1 | -1 |
| rs1029237               | 1 | 1  |
| rs2269553               | 1 | -1 |
| rs4971059               | 1 | 1  |
| rs35622844              | 1 | -1 |
| rs5891,COSM24030,COSM   | 1 | 1  |
| rs2297889               | 1 | -1 |

VEP annotated somatic variants

|                     |   |    |
|---------------------|---|----|
| rs11268748          | 1 | -1 |
| rs30774,COSM449031  | 1 | 1  |
| rs200889110         | 1 | 1  |
| rs148858467         | 1 | -1 |
| rs7885599           | 1 | -1 |
| rs1885117           | 1 | -1 |
| rs12906081          | 1 | -1 |
| rs34350821          | 1 | -1 |
| rs2063010           | 1 | -1 |
|                     | 1 | -1 |
| s1073123,COSM376371 | 1 | -1 |
| rs10901220          | 1 | -1 |
|                     | 1 | 1  |
| rs12030928          | 1 | 1  |
| s1802288,COSM375955 | 1 | -1 |
| rs4826996           | 1 | 1  |
| rs1052773           | 1 | 1  |
| rs12664472          | 1 | 1  |
| s3800294,COSM374997 | 1 | 1  |
|                     | 1 | -1 |
| rs35168566          | 1 | 1  |
| rs182730993         | 1 | -1 |
| rs2001324           | 1 | -1 |
| rs7898115           | 1 | -1 |
| rs12254171          | 1 | -1 |
| 77,COSM3997853,COSM | 1 | -1 |
| rs3750580           | 1 | -1 |
| s1132079,COSM375923 | 1 | -1 |
| rs17634167          | 1 | -1 |
| rs12796222          | 1 | 1  |
| rs1046860           | 1 | 1  |
| rs56058201          | 1 | -1 |
| rs705956            | 1 | 1  |
| rs827958            | 1 | 1  |
|                     | 1 | -1 |
| rs753582974         | 1 | -1 |
| rs2839509           | 1 | 1  |
| rs12575062          | 1 | 1  |
| s2301914,COSM376253 | 1 | 1  |
| rs781247113         | 1 | -1 |
| rs16923472          | 1 | 1  |
| rs2734828           | 1 | -1 |
| rs2247238           | 1 | 1  |
| rs7852539           | 1 | 1  |
| rs1716698           | 1 | -1 |
| rs220147            | 1 | 1  |
| 9,COSM1414248,COSM  | 1 | 1  |
| rs220150            | 1 | 1  |
|                     | 1 | 1  |
| rs373842487         | 1 | -1 |
| rs72836153          | 1 |    |
| rs62231899          | 1 | 1  |
|                     | 1 | 1  |
| rs41277210          | 1 | -1 |
| s4430871,COSM413138 | 1 | -1 |



VEP annotated somatic variants

|                       |   |      |    |
|-----------------------|---|------|----|
|                       | 1 |      | 1  |
|                       | 1 |      | 1  |
| rs9605536             | 1 |      | 1  |
| rs41279154            | 1 |      | 1  |
| rs3214918             | 1 |      | -1 |
|                       | 1 |      | -1 |
| rs1220622,rs112401077 | 1 |      | 1  |
| rs17031260            | 1 |      | 1  |
| rs55721648            | 1 |      | 1  |
|                       | 1 |      | -1 |
|                       | 1 |      | 1  |
|                       | 1 |      | -1 |
| rs79238281            | 1 |      | 1  |
| rs15493,COSM147800    | 1 |      | -1 |
|                       | 1 | 2776 | 1  |
| rs11769825            | 1 |      | 1  |
| rs13246460,COSM377429 | 1 |      | -1 |
| rs10857625            | 1 |      | 1  |
| rs7079527             | 1 |      | 1  |
| rs10886789,COSM147066 | 1 |      | 1  |
| rs2289336             | 1 |      | 1  |
| rs1652727,COSM3751576 | 1 |      | 1  |
| rs1866516             | 1 |      | 1  |
| rs4538426             | 1 |      | 1  |
| rs41307688            | 1 |      | -1 |
| rs181113399           | 1 |      | 1  |
| rs147562907           | 1 |      | 1  |
| rs2527189             | 1 |      | 1  |
| rs763153590,COSM43937 | 1 |      | -1 |
| rs2278128             | 1 |      | -1 |
| rs4720537             | 1 |      | 1  |
| rs21,COSM3753517,COSM | 1 |      | 1  |
| rs910697              | 1 |      | 1  |
| rs3793771,COSM367555  | 1 |      | 1  |
| rs3734500             | 1 |      | 1  |
| rs11068780            | 1 |      | -1 |
| rs3733979             | 1 |      | 1  |
| rs2270844             | 1 |      | 1  |
| rs4134861             | 1 |      | -1 |
| rs114552728           | 1 |      | 1  |
| rs2273739             | 1 |      | -1 |
| rs148023469           | 1 |      | 1  |
| rs1106841,COSM1444742 | 1 |      | -1 |
| rs915927,COSM3756907  | 1 |      | -1 |
| rs25486               | 1 |      | -1 |
|                       | 1 |      | -1 |
| rs3738590             | 1 |      | -1 |
| rs2666826,COSM1472722 | 1 |      | -1 |
| rs11155787,COSM400373 | 1 |      | -1 |
| rs9484827             | 1 |      | 1  |
| rs1001242             | 1 |      | -1 |
| rs415434              | 1 |      | -1 |
| rs556775              | 1 |      | -1 |
| rs11774714            | 1 |      | -1 |
| rs574606000           | 1 |      | 1  |

VEP annotated somatic variants

|                        |   |    |
|------------------------|---|----|
| rs139527148            | 1 | 1  |
| rs537807113            | 1 | 1  |
| rs2306159,COSM414434   | 1 | -1 |
| rs931713               | 1 | -1 |
| rs7781581              | 1 | -1 |
| rs4982766              | 1 | -1 |
| rs4734883              | 1 | 1  |
| rs7915                 | 1 | 1  |
|                        | 1 | 1  |
| rs1989839              | 1 | -1 |
| rs2301639              | 1 | -1 |
| rs2071258              | 1 | 1  |
| rs95,COSM457009,COSM4  | 1 | 1  |
| rs862708,COSM4001010   | 1 | 1  |
| rs28444973             | 1 | 1  |
| rs10822043             | 1 | 1  |
| rs2910443              | 1 | -1 |
|                        | 1 | 1  |
| rs11666149,COSM148715  | 1 | -1 |
| rs384148               | 1 | 1  |
| rs4829778              | 1 | 1  |
| rs1055753              | 1 | 1  |
| rs7273242              | 1 | -1 |
| rs8182086,COSM1375070  | 1 | 1  |
| rs11556528             | 1 | -1 |
| rs9636139,COSM3757118  | 1 | -1 |
| rs3217340              | 1 | -1 |
| rs29,COSM3932977,COSM  | 1 | -1 |
| rs43,COSM3750292,COSM  | 1 | -1 |
| rs1781873,COSM4000602  | 1 | -1 |
| rs11710621,rs118003039 | 1 | -1 |
| rs1129093              | 1 | -1 |
| rs35215913             | 1 | -1 |
| rs8110062,COSM3757155  | 1 | -1 |
| rs12590618,COSM414783  | 1 | 1  |
| rs489172               | 1 | 1  |
|                        | 1 | 1  |
| rs10403445             | 1 | 1  |
| rs781839               | 1 | -1 |

VEP annotated somatic variants

| <b>SYMBOL</b> | <b>SYMBOL_SOURCE</b>    | <b>HGNC_ID</b> | <b>BIOTYPE</b> |
|---------------|-------------------------|----------------|----------------|
| AADAACL2      | HGNC                    | 24427          | protein_coding |
| AAED1         | HGNC                    | 16881          | protein_coding |
| AASS          | HGNC                    | 17366          | protein_coding |
| ABCA10        | HGNC                    | 30             | protein_coding |
| ABCA3         | HGNC                    | 33             | protein_coding |
| ABCA6         | HGNC                    | 36             | protein_coding |
| ABCA6         | HGNC                    | 36             | protein_coding |
| ABCA9         | HGNC                    | 39             | protein_coding |
| ABCC1         | HGNC                    | 51             | protein_coding |
| ABCC6         | HGNC                    | 57             | protein_coding |
| ABCC8         | HGNC                    | 59             | protein_coding |
| ABHD3         | HGNC                    | 18718          | protein_coding |
| ABR           | HGNC                    | 81             | protein_coding |
| AC005013.5    | Clone_based_vega_gene   |                | lincRNA        |
| AC026202.1    | lone_based_ensembl_gene |                | protein_coding |
| ACAD8         | HGNC                    | 87             | protein_coding |
| ACADM         | HGNC                    | 89             | protein_coding |
| ACADSB        | HGNC                    | 91             | protein_coding |
| ACBD3         | HGNC                    | 15453          | protein_coding |
| ACER1         | HGNC                    | 18356          | protein_coding |
| ACP2          | HGNC                    | 123            | protein_coding |
| ACPL2         | HGNC                    | 26303          | protein_coding |
| ACSBG1        | HGNC                    | 29567          | protein_coding |
| ACSF3         | HGNC                    | 27288          | protein_coding |
| ACSM4         | HGNC                    | 32016          | protein_coding |
| ACVR2B        | HGNC                    | 174            | protein_coding |
| ADAM15        | HGNC                    | 193            | protein_coding |
| ADAM17        | HGNC                    | 195            | protein_coding |
| ADAMTS14      | HGNC                    | 14899          | protein_coding |
| ADAMTS2       | HGNC                    | 218            | protein_coding |
| ADAMTS20      | HGNC                    | 17178          | protein_coding |
| ADAMTS4       | HGNC                    | 220            | protein_coding |
| ADAMTS6       | HGNC                    | 222            | protein_coding |
| ADAMTSL1      | HGNC                    | 14632          | protein_coding |
| ADORA1        | HGNC                    | 262            | protein_coding |
| ADORA3        | HGNC                    | 268            | protein_coding |
| AFAP1L2       | HGNC                    | 25901          | protein_coding |
| AFF1          | HGNC                    | 7135           | protein_coding |
| AFF2          | HGNC                    | 3776           | protein_coding |
| AGAP3         | HGNC                    | 16923          | protein_coding |
| AGBL3         | HGNC                    | 27981          | protein_coding |
| AGTR1         | HGNC                    | 336            | protein_coding |
| AHI1          | HGNC                    | 21575          | protein_coding |
| AHSP          | HGNC                    | 18075          | protein_coding |
| AIG1          | HGNC                    | 21607          | protein_coding |
| AIM1L         | HGNC                    | 17295          | protein_coding |
| AIM1L         | HGNC                    | 17295          | protein_coding |
| AIPL1         | HGNC                    | 359            | protein_coding |
| AIRE          | HGNC                    | 360            | protein_coding |
| AIRE          | HGNC                    | 360            | protein_coding |
| AKAP9         | HGNC                    | 379            | protein_coding |
| AKAP9         | HGNC                    | 379            | protein_coding |
| AKR1B10       | HGNC                    | 382            | protein_coding |
| ALB           | HGNC                    | 399            | protein_coding |

VEP annotated somatic variants

|                |                         |       |                |
|----------------|-------------------------|-------|----------------|
| ALDH16A1       | HGNC                    | 28114 | protein_coding |
| ALDH1A3        | HGNC                    | 409   | protein_coding |
| ALOX5          | HGNC                    | 435   | protein_coding |
| ALPK3          | HGNC                    | 17574 | protein_coding |
| ALPK3          | HGNC                    | 17574 | protein_coding |
| AMICA1         | HGNC                    | 19084 | protein_coding |
| AMICA1         | HGNC                    | 19084 | protein_coding |
| ANAPC1         | HGNC                    | 19988 | protein_coding |
| ANK1           | HGNC                    | 492   | protein_coding |
| ANKAR          | HGNC                    | 26350 | protein_coding |
| ANKK1          | HGNC                    | 21027 | protein_coding |
| ANKLE2         | HGNC                    | 29101 | protein_coding |
| ANKRD18B       | HGNC                    | 23644 | protein_coding |
| ANKRD26        | HGNC                    | 29186 | protein_coding |
| ANKRD28        | HGNC                    | 29024 | protein_coding |
| ANKRD35        | HGNC                    | 26323 | protein_coding |
| ANKRD52        | HGNC                    | 26614 | protein_coding |
| ANKRD55        | HGNC                    | 25681 | protein_coding |
| AOX1           | HGNC                    | 553   | protein_coding |
| AP002884.2     | lone_based_ensembl_gene |       | protein_coding |
| AP1B1          | HGNC                    | 554   | protein_coding |
| AP2A1          | HGNC                    | 561   | protein_coding |
| AP4E1          | HGNC                    | 573   | protein_coding |
| AP4E1          | HGNC                    | 573   | protein_coding |
| APBB1IP        | HGNC                    | 17379 | protein_coding |
| APOOL          | HGNC                    | 24009 | protein_coding |
| AQP12A         | HGNC                    | 19941 | protein_coding |
| AQP12A         | HGNC                    | 19941 | protein_coding |
| AQP4           | HGNC                    | 637   | protein_coding |
| AQPEP          | Uniprot_gn              |       | protein_coding |
| ARF3           | HGNC                    | 654   | protein_coding |
| ARHGAP10       | HGNC                    | 26099 | protein_coding |
| ARHGAP19-SLIT1 | HGNC                    | 48348 | protein_coding |
| ARHGAP36       | HGNC                    | 26388 | protein_coding |
| ARHGAP4        | HGNC                    | 674   | protein_coding |
| ARHGEF11       | HGNC                    | 14580 | protein_coding |
| ARHGEF16       | HGNC                    | 15515 | protein_coding |
| ARHGEF2        | HGNC                    | 682   | protein_coding |
| ARHGEF3        | HGNC                    | 683   | protein_coding |
| ARHGEF7        | HGNC                    | 15607 | protein_coding |
| ARID3C         | HGNC                    | 21209 | protein_coding |
| ARL5B          | HGNC                    | 23052 | protein_coding |
| ARMC8          | HGNC                    | 24999 | protein_coding |
| ARMCX4         | HGNC                    | 28615 | protein_coding |
| ARMCX4         | HGNC                    | 28615 | protein_coding |
| ARMCX4         | HGNC                    | 28615 | protein_coding |
| ARMCX4         | HGNC                    | 28615 | protein_coding |
| ARRB2          | HGNC                    | 712   | protein_coding |
| ARRDC2         | HGNC                    | 25225 | protein_coding |
| ARRDC2         | HGNC                    | 25225 | protein_coding |
| ARSA           | HGNC                    | 713   | protein_coding |
| ARVCF          | HGNC                    | 728   | protein_coding |
| ASB10          | HGNC                    | 17185 | protein_coding |
| ASB14          | HGNC                    | 19766 | protein_coding |
| ASB4           | HGNC                    | 16009 | protein_coding |

VEP annotated somatic variants

|         |      |       |                |
|---------|------|-------|----------------|
| ASB6    | HGNC | 17181 | protein_coding |
| ASIC4   | HGNC | 21263 | protein_coding |
| ASPSCR1 | HGNC | 13825 | protein_coding |
| ASTL    | HGNC | 31704 | protein_coding |
| ASTL    | HGNC | 31704 | protein_coding |
| ASTN2   | HGNC | 17021 | protein_coding |
| ASXL3   | HGNC | 29357 | protein_coding |
| ASZ1    | HGNC | 1350  | protein_coding |
| ATG4C   | HGNC | 16040 | protein_coding |
| ATL1    | HGNC | 11231 | protein_coding |
| ATP11A  | HGNC | 13552 | protein_coding |
| ATP13A2 | HGNC | 30213 | protein_coding |
| ATP1A2  | HGNC | 800   | protein_coding |
| ATP1A4  | HGNC | 14073 | protein_coding |
| ATP2C2  | HGNC | 29103 | protein_coding |
| ATP5C1  | HGNC | 833   | protein_coding |
| ATP7A   | HGNC | 869   | protein_coding |
| ATP8B1  | HGNC | 3706  | protein_coding |
| ATP9A   | HGNC | 13540 | protein_coding |
| ATP9A   | HGNC | 13540 | protein_coding |
| ATRIP   | HGNC | 33499 | protein_coding |
| ATXN2L  | HGNC | 31326 | protein_coding |
| AWAT1   | HGNC | 23252 | protein_coding |
| AWAT2   | HGNC | 23251 | protein_coding |
| AXDND1  | HGNC | 26564 | protein_coding |
| AXIN1   | HGNC | 903   | protein_coding |
| B3GNT3  | HGNC | 13528 | protein_coding |
| BAIAP2  | HGNC | 947   | protein_coding |
| BAIAP3  | HGNC | 948   | protein_coding |
| BBS12   | HGNC | 26648 | protein_coding |
| BCKDHA  | HGNC | 986   | protein_coding |
| BCL7B   | HGNC | 1005  | protein_coding |
| BCORL1  | HGNC | 25657 | protein_coding |
| BEST1   | HGNC | 12703 | protein_coding |
| BICD1   | HGNC | 1049  | protein_coding |
| BLNK    | HGNC | 14211 | protein_coding |
| BMP15   | HGNC | 1068  | protein_coding |
| BNC1    | HGNC | 1081  | protein_coding |
| BPIFB2  | HGNC | 16177 | protein_coding |
| BPTF    | HGNC | 3581  | protein_coding |
| BRCA1   | HGNC | 1100  | protein_coding |
| BRCA1   | HGNC | 1100  | protein_coding |
| BRCA1   | HGNC | 1100  | protein_coding |
| BRCA2   | HGNC | 1101  | protein_coding |
| BRD9    | HGNC | 25818 | protein_coding |
| BRWD1   | HGNC | 12760 | protein_coding |
| BSDC1   | HGNC | 25501 | protein_coding |
| BSG     | HGNC | 1116  | protein_coding |
| BSG     | HGNC | 1116  | protein_coding |
| BTBD16  | HGNC | 26340 | protein_coding |
| BTBD16  | HGNC | 26340 | protein_coding |
| BTBD8   | HGNC | 21019 | protein_coding |
| BTG1    | HGNC | 1130  | protein_coding |
| BTNL9   | HGNC | 24176 | protein_coding |
| BZRAP1  | HGNC | 16831 | protein_coding |

VEP annotated somatic variants

|           |      |       |                |
|-----------|------|-------|----------------|
| C10orf105 | HGNC | 20304 | protein_coding |
| C10orf71  | HGNC | 26973 | protein_coding |
| C10orf90  | HGNC | 26563 | protein_coding |
| C11orf49  | HGNC | 28720 | protein_coding |
| C12orf49  | HGNC | 26128 | protein_coding |
| C12orf55  | HGNC | 26456 | protein_coding |
| C12orf60  | HGNC | 28726 | protein_coding |
| C14orf164 | HGNC | 20438 | protein_coding |
| C17orf107 | HGNC | 37238 | protein_coding |
| C17orf53  | HGNC | 28460 | protein_coding |
| C19orf26  | HGNC | 28617 | protein_coding |
| C19orf33  | HGNC | 16668 | protein_coding |
| C1GALT1C1 | HGNC | 24338 | protein_coding |
| C1orf101  | HGNC | 28491 | protein_coding |
| C1orf141  | HGNC | 32044 | protein_coding |
| C1orf168  | HGNC | 27295 | protein_coding |
| C1orf173  | HGNC | 25346 | protein_coding |
| C1QTNF1   | HGNC | 14324 | protein_coding |
| C2orf54   | HGNC | 26216 | protein_coding |
| C2orf81   | HGNC | 34350 | protein_coding |
| C3        | HGNC | 1318  | protein_coding |
| C4orf29   | HGNC | 26111 | protein_coding |
| C5        | HGNC | 1331  | protein_coding |
| C5        | HGNC | 1331  | protein_coding |
| C6orf201  | HGNC | 21620 | protein_coding |
| C7        | HGNC | 1346  | protein_coding |
| CA10      | HGNC | 1369  | protein_coding |
| CA5A      | HGNC | 1377  | protein_coding |
| CABIN1    | HGNC | 24187 | protein_coding |
| CACNA1A   | HGNC | 1388  | protein_coding |
| CACNA1B   | HGNC | 1389  | protein_coding |
| CACNA1C   | HGNC | 1390  | protein_coding |
| CACNA2D2  | HGNC | 1400  | protein_coding |
| CACNA2D2  | HGNC | 1400  | protein_coding |
| CACNB2    | HGNC | 1402  | protein_coding |
| CAGE1     | HGNC | 21622 | protein_coding |
| CALD1     | HGNC | 1441  | protein_coding |
| CALR      | HGNC | 1455  | protein_coding |
| CAMK1D    | HGNC | 19341 | protein_coding |
| CAMK2D    | HGNC | 1462  | protein_coding |
| CAMKMT    | HGNC | 26276 | protein_coding |
| CAMSAP3   | HGNC | 29307 | protein_coding |
| CAPN11    | HGNC | 1478  | protein_coding |
| CAPN9     | HGNC | 1486  | protein_coding |
| CAPS      | HGNC | 1487  | protein_coding |
| CARD10    | HGNC | 16422 | protein_coding |
| CARD8     | HGNC | 17057 | protein_coding |
| CASP14    | HGNC | 1502  | protein_coding |
| CASQ1     | HGNC | 1512  | protein_coding |
| CASZ1     | HGNC | 26002 | protein_coding |
| CATSPERG  | HGNC | 25243 | protein_coding |
| CAV3      | HGNC | 1529  | protein_coding |
| CCDC102A  | HGNC | 28097 | protein_coding |
| CCDC104   | HGNC | 30540 | protein_coding |
| CCDC105   | HGNC | 26866 | protein_coding |

VEP annotated somatic variants

|                |      |       |                |
|----------------|------|-------|----------------|
| CCDC11         | HGNC | 26530 | protein_coding |
| CCDC120        | HGNC | 28910 | protein_coding |
| CCDC132        | HGNC | 25956 | protein_coding |
| CCDC137        | HGNC | 33451 | protein_coding |
| CCDC147        | HGNC | 26676 | protein_coding |
| CCDC158        | HGNC | 26374 | protein_coding |
| CCDC169-SOHLH2 | HGNC | 38866 | protein_coding |
| CCDC18         | HGNC | 30370 | protein_coding |
| CCDC57         | HGNC | 27564 | protein_coding |
| CCDC6          | HGNC | 18782 | protein_coding |
| CCDC81         | HGNC | 26281 | protein_coding |
| CCL19          | HGNC | 10617 | protein_coding |
| CCR2           | HGNC | 1603  | protein_coding |
| CD109          | HGNC | 21685 | protein_coding |
| CD200R1L       | HGNC | 24665 | protein_coding |
| CD244          | HGNC | 18171 | protein_coding |
| CD300A         | HGNC | 19319 | protein_coding |
| CD3EAP         | HGNC | 24219 | protein_coding |
| CD46           | HGNC | 6953  | protein_coding |
| CD7            | HGNC | 1695  | protein_coding |
| CDC23          | HGNC | 1724  | protein_coding |
| CDC42BPG       | HGNC | 29829 | protein_coding |
| CDC45          | HGNC | 1739  | protein_coding |
| CDCP1          | HGNC | 24357 | protein_coding |
| CDH18          | HGNC | 1757  | protein_coding |
| CDK19          | HGNC | 19338 | protein_coding |
| CDK3           | HGNC | 1772  | protein_coding |
| CDK7           | HGNC | 1778  | protein_coding |
| CDKAL1         | HGNC | 21050 | protein_coding |
| CDKL5          | HGNC | 11411 | protein_coding |
| CDS2           | HGNC | 1801  | protein_coding |
| CDSN           | HGNC | 1802  | protein_coding |
| CDSN           | HGNC | 1802  | protein_coding |
| CEACAM21       | HGNC | 28834 | protein_coding |
| CEACAM3        | HGNC | 1815  | protein_coding |
| CECR1          | HGNC | 1839  | protein_coding |
| CECR2          | HGNC | 1840  | protein_coding |
| CECR2          | HGNC | 1840  | protein_coding |
| CECR5          | HGNC | 1843  | protein_coding |
| CECR6          | HGNC | 1844  | protein_coding |
| CENPI          | HGNC | 3968  | protein_coding |
| CENPW          | HGNC | 21488 | protein_coding |
| CEP250         | HGNC | 1859  | protein_coding |
| CEP250         | HGNC | 1859  | protein_coding |
| CEP63          | HGNC | 25815 | protein_coding |
| CEP63          | HGNC | 25815 | protein_coding |
| CEP70          | HGNC | 29972 | protein_coding |
| CEP95          | HGNC | 25141 | protein_coding |
| CERCAM         | HGNC | 23723 | protein_coding |
| CES2           | HGNC | 1864  | protein_coding |
| CFH            | HGNC | 4883  | protein_coding |
| CFTR           | HGNC | 1884  | protein_coding |
| CGB7           | HGNC | 16451 | protein_coding |
| CHD1L          | HGNC | 1916  | protein_coding |
| CHFR           | HGNC | 20455 | protein_coding |

VEP annotated somatic variants

|         |            |       |                |
|---------|------------|-------|----------------|
| CHFR    | HGNC       | 20455 | protein_coding |
| CHI3L2  | HGNC       | 1933  | protein_coding |
| CHRNA1  | HGNC       | 1961  | protein_coding |
| CHST14  | HGNC       | 24464 | protein_coding |
| CIITA   | HGNC       | 7067  | protein_coding |
| CINP    | HGNC       | 23789 | protein_coding |
| CIT     | HGNC       | 1985  | protein_coding |
| CITED1  | HGNC       | 1986  | protein_coding |
| CKMT2   | HGNC       | 1996  | protein_coding |
| CLCN6   | HGNC       | 2024  | protein_coding |
| CLCNKA  | HGNC       | 2026  | protein_coding |
| CLDN15  | HGNC       | 2036  | protein_coding |
| CLEC4E  | HGNC       | 14555 | protein_coding |
| CLIC2   | HGNC       | 2063  | protein_coding |
| CLIC4   | HGNC       | 13518 | protein_coding |
| CLIP1   | HGNC       | 10461 | protein_coding |
| CLIP4   | HGNC       | 26108 | protein_coding |
| CNKSR2  | HGNC       | 19701 | protein_coding |
| CNNM1   | HGNC       | 102   | protein_coding |
| CNOT1   | HGNC       | 7877  | protein_coding |
| CNOT11  | HGNC       | 25217 | protein_coding |
| CNR1    | HGNC       | 2159  | protein_coding |
| CNTN4   | HGNC       | 2174  | protein_coding |
| CNTNAP2 | HGNC       | 13830 | protein_coding |
| CNTNAP2 | HGNC       | 13830 | protein_coding |
| CNTRL   | HGNC       | 1858  | protein_coding |
| COBL    | HGNC       | 22199 | protein_coding |
| COG4    | HGNC       | 18620 | protein_coding |
| COG5    | HGNC       | 14857 | protein_coding |
| COL17A1 | HGNC       | 2194  | protein_coding |
| COL23A1 | HGNC       | 22990 | protein_coding |
| COL24A1 | HGNC       | 20821 | protein_coding |
| COL24A1 | HGNC       | 20821 | protein_coding |
| COL26A1 | HGNC       | 18038 | protein_coding |
| COL4A6  | HGNC       | 2208  | protein_coding |
| COL5A3  | HGNC       | 14864 | protein_coding |
| COL6A1  | HGNC       | 2211  | protein_coding |
| COL6A3  | HGNC       | 2213  | protein_coding |
| COMT    | HGNC       | 2228  | protein_coding |
| COX20   | HGNC       | 26970 | protein_coding |
| CP      | HGNC       | 2295  | protein_coding |
| CPEB1   | HGNC       | 21744 | protein_coding |
| CPEB4   | HGNC       | 21747 | protein_coding |
| CR2     | HGNC       | 2336  | protein_coding |
| CRB2    | HGNC       | 18688 | protein_coding |
| CRHR2   | HGNC       | 2358  | protein_coding |
| CRIM1   | HGNC       | 2359  | protein_coding |
| CRIM1   | HGNC       | 2359  | protein_coding |
| CRISP3  | HGNC       | 16904 | protein_coding |
| CRNKL1  | HGNC       | 15762 | protein_coding |
| CRTC3   | HGNC       | 26148 | protein_coding |
| CRYBG3  | HGNC       | 34427 | protein_coding |
| CRYBG3  | Uniprot_gn | 34427 | protein_coding |
| CSAG1   | HGNC       | 24294 | protein_coding |
| CSNK2A1 | HGNC       | 2457  | protein_coding |



VEP annotated somatic variants

|              |                       |       |                |
|--------------|-----------------------|-------|----------------|
| CSPG4        | HGNC                  | 2466  | protein_coding |
| CTCF         | HGNC                  | 16234 | protein_coding |
| CTD-3088G3.8 | Clone_based_vega_gene |       | protein_coding |
| CTNNA3       | HGNC                  | 2511  | protein_coding |
| CTNNAL1      | HGNC                  | 2512  | protein_coding |
| CUBN         | HGNC                  | 2548  | protein_coding |
| CUL2         | HGNC                  | 2552  | protein_coding |
| CUL7         | HGNC                  | 21024 | protein_coding |
| CUX1         | HGNC                  | 2557  | protein_coding |
| CUX1         | HGNC                  | 2557  | protein_coding |
| CWC22        | HGNC                  | 29322 | protein_coding |
| CWC22        | HGNC                  | 29322 | protein_coding |
| CWF19L2      | HGNC                  | 26508 | protein_coding |
| CXCR3        | HGNC                  | 4540  | protein_coding |
| CYB561A3     | HGNC                  | 23014 | protein_coding |
| CYB5R2       | HGNC                  | 24376 | protein_coding |
| CYP2A13      | HGNC                  | 2608  | protein_coding |
| CYP2A13      | HGNC                  | 2608  | protein_coding |
| CYP3A4       | HGNC                  | 2637  | protein_coding |
| CYP4F12      | HGNC                  | 18857 | protein_coding |
| CYP51A1      | HGNC                  | 2649  | protein_coding |
| DAGLA        | HGNC                  | 1165  | protein_coding |
| DARS         | HGNC                  | 2678  | protein_coding |
| DBR1         | HGNC                  | 15594 | protein_coding |
| DCAF15       | HGNC                  | 25095 | protein_coding |
| DCAF15       | HGNC                  | 25095 | protein_coding |
| DCAF15       | HGNC                  | 25095 | protein_coding |
| DCC          | HGNC                  | 2701  | protein_coding |
| DCDC2        | HGNC                  | 18141 | protein_coding |
| DCHS2        | HGNC                  | 23111 | protein_coding |
| DCTD         | HGNC                  | 2710  | protein_coding |
| DDX11        | HGNC                  | 2736  | protein_coding |
| DDX11        | HGNC                  | 2736  | protein_coding |
| DDX59        | HGNC                  | 25360 | protein_coding |
| DENND1A      | HGNC                  | 29324 | protein_coding |
| DENND5A      | HGNC                  | 19344 | protein_coding |
| DEPDC1B      | HGNC                  | 24902 | protein_coding |
| DGCR2        | HGNC                  | 2845  | protein_coding |
| DGKB         | HGNC                  | 2850  | protein_coding |
| DHRS3        | HGNC                  | 17693 | protein_coding |
| DHX32        | HGNC                  | 16717 | protein_coding |
| DHX37        | HGNC                  | 17210 | protein_coding |
| DHX8         | HGNC                  | 2749  | protein_coding |
| DHX8         | HGNC                  | 2749  | protein_coding |
| DHX8         | HGNC                  | 2749  | protein_coding |
| DIAPH1       | HGNC                  | 2876  | protein_coding |
| DIP2B        | HGNC                  | 29284 | protein_coding |
| DIS3L        | HGNC                  | 28698 | protein_coding |
| DISC1        | HGNC                  | 2888  | protein_coding |
| DISC1        | HGNC                  | 2888  | protein_coding |
| DKK4         | HGNC                  | 2894  | protein_coding |
| DLG2         | HGNC                  | 2901  | protein_coding |
| DLG3         | HGNC                  | 2902  | protein_coding |
| DLG5         | HGNC                  | 2904  | protein_coding |
| DLK2         | HGNC                  | 21113 | protein_coding |

VEP annotated somatic variants

|          |      |       |                |
|----------|------|-------|----------------|
| DMKN     | HGNC | 25063 | protein_coding |
| DNA2     | HGNC | 2939  | protein_coding |
| DNAH11   | HGNC | 2942  | protein_coding |
| DNAH12   | HGNC | 2943  | protein_coding |
| DNAH14   | HGNC | 2945  | protein_coding |
| DNAH14   | HGNC | 2945  | protein_coding |
| DNAH14   | HGNC | 2945  | protein_coding |
| DNAH14   | HGNC | 2945  | protein_coding |
| DNAH14   | HGNC | 2945  | protein_coding |
| DNAH17   | HGNC | 2946  | protein_coding |
| DNAH8    | HGNC | 2952  | protein_coding |
| DNAH9    | HGNC | 2953  | protein_coding |
| DNALI1   | HGNC | 14353 | protein_coding |
| DNASE2B  | HGNC | 28875 | protein_coding |
| DNMBP    | HGNC | 30373 | protein_coding |
| DOCK2    | HGNC | 2988  | protein_coding |
| DOCK3    | HGNC | 2989  | protein_coding |
| DOT1L    | HGNC | 24948 | protein_coding |
| DPEP1    | HGNC | 3002  | protein_coding |
| DPF1     | HGNC | 20225 | protein_coding |
| DPH5     | HGNC | 24270 | protein_coding |
| DPY19L2  | HGNC | 19414 | protein_coding |
| DRAXIN   | HGNC | 25054 | protein_coding |
| DRP2     | HGNC | 3032  | protein_coding |
| DRP2     | HGNC | 3032  | protein_coding |
| DRP2     | HGNC | 3032  | protein_coding |
| DSCAML1  | HGNC | 14656 | protein_coding |
| DSG3     | HGNC | 3050  | protein_coding |
| DSG4     | HGNC | 21307 | protein_coding |
| DSG4     | HGNC | 21307 | protein_coding |
| DSP      | HGNC | 3052  | protein_coding |
| DST      | HGNC | 1090  | protein_coding |
| DTD2     | HGNC | 20277 | protein_coding |
| DTNBP1   | HGNC | 17328 | protein_coding |
| DTWD2    | HGNC | 19334 | protein_coding |
| DTX2     | HGNC | 15973 | protein_coding |
| DUSP18   | HGNC | 18484 | protein_coding |
| DUSP6    | HGNC | 3072  | protein_coding |
| DYNC111  | HGNC | 2963  | protein_coding |
| DYNC2H1  | HGNC | 2962  | protein_coding |
| EBNA1BP2 | HGNC | 15531 | protein_coding |
| EBP      | HGNC | 3133  | protein_coding |
| ECE1     | HGNC | 3146  | protein_coding |
| ECEL1    | HGNC | 3147  | protein_coding |
| ECT2     | HGNC | 3155  | protein_coding |
| ECT2L    | HGNC | 21118 | protein_coding |
| EDEM3    | HGNC | 16787 | protein_coding |
| EDN1     | HGNC | 3176  | protein_coding |
| EDNRB    | HGNC | 3180  | protein_coding |
| EEA1     | HGNC | 3185  | protein_coding |
| EEF1A2   | HGNC | 3192  | protein_coding |
| EEF1E1   | HGNC | 3212  | protein_coding |
| EFCAB13  | HGNC | 26864 | protein_coding |
| EFCAB3   | HGNC | 26379 | protein_coding |
| EFCAB4B  | HGNC | 28657 | protein_coding |

VEP annotated somatic variants

|         |      |       |                |
|---------|------|-------|----------------|
| EFHB    | HGNC | 26330 | protein_coding |
| EFTUD1  | HGNC | 25789 | protein_coding |
| EFTUD2  | HGNC | 30858 | protein_coding |
| EIF2S3  | HGNC | 3267  | protein_coding |
| ELF4    | HGNC | 3319  | protein_coding |
| ELFN2   | HGNC | 29396 | protein_coding |
| ELFN2   | HGNC | 29396 | protein_coding |
| ELFN2   | HGNC | 29396 | protein_coding |
| ELN     | HGNC | 3327  | protein_coding |
| ELOVL2  | HGNC | 14416 | protein_coding |
| EMC1    | HGNC | 28957 | protein_coding |
| EMC2    | HGNC | 28963 | protein_coding |
| EMC2    | HGNC | 28963 | protein_coding |
| EML1    | HGNC | 3330  | protein_coding |
| EML1    | HGNC | 3330  | protein_coding |
| EML1    | HGNC | 3330  | protein_coding |
| EN1     | HGNC | 3342  | protein_coding |
| ENG     | HGNC | 3349  | protein_coding |
| ENOX1   | HGNC | 25474 | protein_coding |
| ENTPD1  | HGNC | 3363  | protein_coding |
| ENTPD5  | HGNC | 3367  | protein_coding |
| EP400   | HGNC | 11958 | protein_coding |
| EPHB6   | HGNC | 3396  | protein_coding |
| EPHX1   | HGNC | 3401  | protein_coding |
| EPHX2   | HGNC | 3402  | protein_coding |
| ERN1    | HGNC | 3449  | protein_coding |
| ESPL1   | HGNC | 16856 | protein_coding |
| ESYT3   | HGNC | 24295 | protein_coding |
| ETFA    | HGNC | 3481  | protein_coding |
| ETFB    | HGNC | 3482  | protein_coding |
| ETHE1   | HGNC | 23287 | protein_coding |
| EVI5    | HGNC | 3501  | protein_coding |
| EVI5L   | HGNC | 30464 | protein_coding |
| EVI5L   | HGNC | 30464 | protein_coding |
| EVPL    | HGNC | 3503  | protein_coding |
| EVPL    | HGNC | 3503  | protein_coding |
| EXD2    | HGNC | 20217 | protein_coding |
| EXO1    | HGNC | 3511  | protein_coding |
| EXOC1   | HGNC | 30380 | protein_coding |
| EZR     | HGNC | 12691 | protein_coding |
| F8      | HGNC | 3546  | protein_coding |
| F8      | HGNC | 3546  | protein_coding |
| F9      | HGNC | 3551  | protein_coding |
| FAAH2   | HGNC | 26440 | protein_coding |
| FADS2   | HGNC | 3575  | protein_coding |
| FADS3   | HGNC | 3576  | protein_coding |
| FAH     | HGNC | 3579  | protein_coding |
| FAM118A | HGNC | 1313  | protein_coding |
| FAM122C | HGNC | 25202 | protein_coding |
| FAM122C | HGNC | 25202 | protein_coding |
| FAM127C | HGNC | 33156 | protein_coding |
| FAM127C | HGNC | 33156 | protein_coding |
| FAM135B | HGNC | 28029 | protein_coding |
| FAM162B | HGNC | 21549 | protein_coding |
| FAM168A | HGNC | 28999 | protein_coding |

VEP annotated somatic variants

|         |      |       |                 |
|---------|------|-------|-----------------|
| FAM181B | HGNC | 28512 | protein_coding  |
| FAM184B | HGNC | 29235 | protein_coding  |
| FAM186A | HGNC | 26980 | protein_coding  |
| FAM187B | HGNC | 26366 | protein_coding  |
| FAM189B | HGNC | 1233  | protein_coding  |
| FAM21C  | HGNC | 23414 | protein_coding  |
| FAM63A  | HGNC | 25648 | protein_coding  |
| FAM65B  | HGNC | 13872 | protein_coding  |
| FAM81B  | HGNC | 26335 | protein_coding  |
| FANCA   | HGNC | 3582  | protein_coding  |
| FANCE   | HGNC | 3586  | protein_coding  |
| FANCE   | HGNC | 3586  | protein_coding  |
| FANCE   | HGNC | 3586  | protein_coding  |
| FAR2    | HGNC | 25531 | protein_coding  |
| FARP2   | HGNC | 16460 | protein_coding  |
| FARP2   | HGNC | 16460 | protein_coding  |
| FASN    | HGNC | 3594  | protein_coding  |
| FASN    | HGNC | 3594  | protein_coding  |
| FASN    | HGNC | 3594  | protein_coding  |
| FASN    | HGNC | 3594  | protein_coding  |
| FBLN2   | HGNC | 3601  | protein_coding  |
| FBN3    | HGNC | 18794 | protein_coding  |
| FBRSL1  | HGNC | 29308 | protein_coding  |
| FBXL21  | HGNC | 13600 | retained_intron |
| FBXO10  | HGNC | 13589 | protein_coding  |
| FBXO10  | HGNC | 13589 | protein_coding  |
| FBXO17  | HGNC | 18754 | protein_coding  |
| FBXW12  | HGNC | 20729 | protein_coding  |
| FBXW4   | HGNC | 10847 | protein_coding  |
| FCAMR   | HGNC | 24692 | protein_coding  |
| FCHO1   | HGNC | 29002 | protein_coding  |
| FGFR4   | HGNC | 3691  | protein_coding  |
| FGG     | HGNC | 3694  | protein_coding  |
| FHOD3   | HGNC | 26178 | protein_coding  |
| FHOD3   | HGNC | 26178 | protein_coding  |
| FHOD3   | HGNC | 26178 | protein_coding  |
| FIGN    | HGNC | 13285 | protein_coding  |
| FIP1L1  | HGNC | 19124 | protein_coding  |
| FKBP6   | HGNC | 3722  | protein_coding  |
| FKBP7   | HGNC | 3723  | protein_coding  |
| FLNA    | HGNC | 3754  | protein_coding  |
| FLNB    | HGNC | 3755  | protein_coding  |
| FLT4    | HGNC | 3767  | protein_coding  |
| FMN2    | HGNC | 14074 | protein_coding  |
| FMN2    | HGNC | 14074 | protein_coding  |
| FMO3    | HGNC | 3771  | protein_coding  |
| FNBP4   | HGNC | 19752 | protein_coding  |
| FNBP4   | HGNC | 19752 | protein_coding  |
| FNDC1   | HGNC | 21184 | protein_coding  |
| FNDC1   | HGNC | 21184 | protein_coding  |
| FOXF2   | HGNC | 3810  | protein_coding  |
| FOXP4   | HGNC | 20842 | protein_coding  |
| FPGS    | HGNC | 3824  | protein_coding  |
| FRAS1   | HGNC | 19185 | protein_coding  |
| FRAS1   | HGNC | 19185 | protein_coding  |

## VEP annotated somatic variants

|         |      |       |                |
|---------|------|-------|----------------|
| FRAS1   | HGNC | 19185 | protein_coding |
| FRAS1   | HGNC | 19185 | protein_coding |
| FRAS1   | HGNC | 19185 | protein_coding |
| FREM3   | HGNC | 25172 | protein_coding |
| FRMD4A  | HGNC | 25491 | protein_coding |
| FSIP1   | HGNC | 21674 | protein_coding |
| FSTL5   | HGNC | 21386 | protein_coding |
| FUBP3   | HGNC | 4005  | protein_coding |
| FUT1    | HGNC | 4012  | protein_coding |
| FUT6    | HGNC | 4017  | protein_coding |
| FXYD2   | HGNC | 4026  | protein_coding |
| FYCO1   | HGNC | 14673 | protein_coding |
| GADL1   | HGNC | 27949 | protein_coding |
| GAK     | HGNC | 4113  | protein_coding |
| GAK     | HGNC | 4113  | protein_coding |
| GALC    | HGNC | 4115  | protein_coding |
| GALC    | HGNC | 4115  | protein_coding |
| GALK1   | HGNC | 4118  | protein_coding |
| GALNT10 | HGNC | 19873 | protein_coding |
| GALNT14 | HGNC | 22946 | protein_coding |
| GALNT8  | HGNC | 4130  | protein_coding |
| GALNT8  | HGNC | 4130  | protein_coding |
| GAREM   | HGNC | 26136 | protein_coding |
| GAREM   | HGNC | 26136 | protein_coding |
| GAREM   | HGNC | 26136 | protein_coding |
| GARNL3  | HGNC | 25425 | protein_coding |
| GBP5    | HGNC | 19895 | protein_coding |
| GBP5    | HGNC | 19895 | protein_coding |
| GBP5    | HGNC | 19895 | protein_coding |
| GCGR    | HGNC | 4192  | protein_coding |
| GCNT2   | HGNC | 4204  | protein_coding |
| GDA     | HGNC | 4212  | protein_coding |
| GDAP1L1 | HGNC | 4213  | protein_coding |
| GDF2    | HGNC | 4217  | protein_coding |
| GEMIN2  | HGNC | 10884 | protein_coding |
| GFM1    | HGNC | 13780 | protein_coding |
| GGCX    | HGNC | 4247  | protein_coding |
| GGN     | HGNC | 18869 | protein_coding |
| GGN     | HGNC | 18869 | protein_coding |
| GHDC    | HGNC | 24438 | protein_coding |
| GINM1   | HGNC | 21074 | protein_coding |
| GINS1   | HGNC | 28980 | protein_coding |
| GLG1    | HGNC | 4316  | protein_coding |
| GLG1    | HGNC | 4316  | protein_coding |
| GLIS2   | HGNC | 29450 | protein_coding |
| GLO1    | HGNC | 4323  | protein_coding |
| GLRA4   | HGNC | 31715 | protein_coding |
| GLRA4   | HGNC | 31715 | protein_coding |
| GLT8D2  | HGNC | 24890 | protein_coding |
| GLYATL2 | HGNC | 24178 | protein_coding |
| GMCL1   | HGNC | 23843 | protein_coding |
| GNAZ    | HGNC | 4395  | protein_coding |
| GNB1L   | HGNC | 4397  | protein_coding |
| GNRHR   | HGNC | 4421  | protein_coding |
| GOLGA3  | HGNC | 4426  | protein_coding |

VEP annotated somatic variants

|           |      |       |                |
|-----------|------|-------|----------------|
| GP1BA     | HGNC | 4439  | protein_coding |
| GPC6      | HGNC | 4454  | protein_coding |
| GPLD1     | HGNC | 4459  | protein_coding |
| GPM6B     | HGNC | 4461  | protein_coding |
| GPN1      | HGNC | 17030 | protein_coding |
| GPR101    | HGNC | 14963 | protein_coding |
| GPR123    | HGNC | 13838 | protein_coding |
| GPR123    | HGNC | 13838 | protein_coding |
| GPR123    | HGNC | 13838 | protein_coding |
| GPR123    | HGNC | 13838 | protein_coding |
| GPR176    | HGNC | 32370 | protein_coding |
| GRAMD1B   | HGNC | 29214 | protein_coding |
| GRAMD1C   | HGNC | 25252 | protein_coding |
| GRAMD4    | HGNC | 29113 | protein_coding |
| GRAMD4    | HGNC | 29113 | protein_coding |
| GRAMD4    | HGNC | 29113 | protein_coding |
| GREB1     | HGNC | 24885 | protein_coding |
| GRIA1     | HGNC | 4571  | protein_coding |
| GRIA2     | HGNC | 4572  | protein_coding |
| GRIA3     | HGNC | 4573  | protein_coding |
| GRM7      | HGNC | 4599  | protein_coding |
| GSE1      | HGNC | 28979 | protein_coding |
| GSN       | HGNC | 4620  | protein_coding |
| GSPT2     | HGNC | 4622  | protein_coding |
| GSTP1     | HGNC | 4638  | protein_coding |
| GSTZ1     | HGNC | 4643  | protein_coding |
| GTPBP4    | HGNC | 21535 | protein_coding |
| GTPBP4    | HGNC | 21535 | protein_coding |
| GUCY2F    | HGNC | 4691  | protein_coding |
| GXYLT2    | HGNC | 33383 | protein_coding |
| HAL       | HGNC | 4806  | protein_coding |
| HAMP      | HGNC | 15598 | protein_coding |
| HDAC7     | HGNC | 14067 | protein_coding |
| HDAC7     | HGNC | 14067 | protein_coding |
| HDAC9     | HGNC | 14065 | protein_coding |
| HDDC2     | HGNC | 21078 | protein_coding |
| HDHD1     | HGNC | 16818 | protein_coding |
| HEATR1    | HGNC | 25517 | protein_coding |
| HEATR1    | HGNC | 25517 | protein_coding |
| HEATR1    | HGNC | 25517 | protein_coding |
| HEATR2    | HGNC | 26013 | protein_coding |
| HECTD1    | HGNC | 20157 | protein_coding |
| HECTD1    | HGNC | 20157 | protein_coding |
| HELLS     | HGNC | 4861  | protein_coding |
| HELLS     | HGNC | 4861  | protein_coding |
| HEMK1     | HGNC | 24923 | protein_coding |
| HERC1     | HGNC | 4867  | protein_coding |
| HFE       | HGNC | 4886  | protein_coding |
| HGF       | HGNC | 4893  | protein_coding |
| HHATL     | HGNC | 13242 | protein_coding |
| HHIPL1    | HGNC | 19710 | protein_coding |
| HIGD1B    | HGNC | 24318 | protein_coding |
| HINT1     | HGNC | 4912  | protein_coding |
| HIST1H2BF | HGNC | 4752  | protein_coding |
| HIST1H3D  | HGNC | 4767  | protein_coding |

VEP annotated somatic variants

|          |      |       |                |
|----------|------|-------|----------------|
| HIST1H4B | HGNC | 4789  | protein_coding |
| HKDC1    | HGNC | 23302 | protein_coding |
| HLA-DPB1 | HGNC | 4940  | protein_coding |
| HLCS     | HGNC | 4976  | protein_coding |
| HLTF     | HGNC | 11099 | protein_coding |
| HMBS     | HGNC | 4982  | protein_coding |
| HMGXB4   | HGNC | 5003  | protein_coding |
| HMGXB4   | HGNC | 5003  | protein_coding |
| HNF1A    | HGNC | 11621 | protein_coding |
| HNRNPUL1 | HGNC | 17011 | protein_coding |
| HOOK2    | HGNC | 19885 | protein_coding |
| HPN      | HGNC | 5155  | protein_coding |
| HPS6     | HGNC | 18817 | protein_coding |
| HSPB6    | HGNC | 26511 | protein_coding |
| HTR5A    | HGNC | 5300  | protein_coding |
| HUWE1    | HGNC | 30892 | protein_coding |
| HUWE1    | HGNC | 30892 | protein_coding |
| ICOSLG   | HGNC | 17087 | protein_coding |
| ICOSLG   | HGNC | 17087 | protein_coding |
| ICOSLG   | HGNC | 17087 | protein_coding |
| IDH2     | HGNC | 5383  | protein_coding |
| IDH3A    | HGNC | 5384  | protein_coding |
| IFI16    | HGNC | 5395  | protein_coding |
| IFNAR2   | HGNC | 5433  | protein_coding |
| IGF1R    | HGNC | 5465  | protein_coding |
| IGF2R    | HGNC | 5467  | protein_coding |
| IGF2R    | HGNC | 5467  | protein_coding |
| IGF2R    | HGNC | 5467  | protein_coding |
| IGLON5   | HGNC | 34550 | protein_coding |
| IGSF1    | HGNC | 5948  | protein_coding |
| IGSF1    | HGNC | 5948  | protein_coding |
| IGSF1    | HGNC | 5948  | protein_coding |
| IGSF11   | HGNC | 16669 | protein_coding |
| IGSF11   | HGNC | 16669 | protein_coding |
| IGSF11   | HGNC | 16669 | protein_coding |
| IGSF22   | HGNC | 26750 | protein_coding |
| IGSF9B   | HGNC | 32326 | protein_coding |
| IKBKAP   | HGNC | 5959  | protein_coding |
| IL17RC   | HGNC | 18358 | protein_coding |
| IL20RA   | HGNC | 6003  | protein_coding |
| IL22RA1  | HGNC | 13700 | protein_coding |
| IL2RA    | HGNC | 6008  | protein_coding |
| INO80E   | HGNC | 26905 | protein_coding |
| INS      | HGNC | 6081  | protein_coding |
| INS-IGF2 | HGNC | 33527 | protein_coding |
| INSR     | HGNC | 6091  | protein_coding |
| INSR     | HGNC | 6091  | protein_coding |
| INTS1    | HGNC | 24555 | protein_coding |
| INTS1    | HGNC | 24555 | protein_coding |
| INTS6    | HGNC | 14879 | protein_coding |
| IQGAP2   | HGNC | 6111  | protein_coding |
| IQGAP3   | HGNC | 20669 | protein_coding |
| IQSEC3   | HGNC | 29193 | protein_coding |
| IRF5     | HGNC | 6120  | protein_coding |
| IRGC     | HGNC | 28835 | protein_coding |

VEP annotated somatic variants

|          |      |       |                      |
|----------|------|-------|----------------------|
| ITGA10   | HGNC | 6135  | protein_coding       |
| ITGA10   | HGNC | 6135  | protein_coding       |
| ITGA4    | HGNC | 6140  | protein_coding       |
| ITGA9    | HGNC | 6145  | protein_coding       |
| ITIH4    | HGNC | 6169  | protein_coding       |
| ITIH4    | HGNC | 6169  | protein_coding       |
| ITIH4    | HGNC | 6169  | protein_coding       |
| ITM2A    | HGNC | 6173  | protein_coding       |
| ITPKB    | HGNC | 6179  | protein_coding       |
| ITPR2    | HGNC | 6181  | protein_coding       |
| ITPR2    | HGNC | 6181  | protein_coding       |
| ITPR3    | HGNC | 6182  | protein_coding       |
| ITPRIP   | HGNC | 29370 | protein_coding       |
| ITSN1    | HGNC | 6183  | protein_coding       |
| ITSN1    | HGNC | 6183  | protein_coding       |
| JADE1    | HGNC | 30027 | protein_coding       |
| JADE3    | HGNC | 22982 | protein_coding       |
| JAKMIP3  | HGNC | 23523 | protein_coding       |
| JARID2   | HGNC | 6196  | protein_coding       |
| JARID2   | HGNC | 6196  | protein_coding       |
| JARID2   | HGNC | 6196  | protein_coding       |
| JRKL     | HGNC | 6200  | protein_coding       |
| KANK1    | HGNC | 19309 | protein_coding       |
| KANK4    | HGNC | 27263 | protein_coding       |
| KANK4    | HGNC | 27263 | protein_coding       |
| KANK4    | HGNC | 27263 | protein_coding       |
| KATNA1   | HGNC | 6216  | protein_coding       |
| KCNA7    | HGNC | 6226  | protein_coding       |
| KCNAB1   | HGNC | 6228  | protein_coding       |
| KCNU1    | HGNC | 18867 | protein_coding       |
| KCP      | HGNC | 17585 | processed_transcript |
| KCTD10   | HGNC | 23236 | protein_coding       |
| KCTD4    | HGNC | 23227 | protein_coding       |
| KDM3B    | HGNC | 1337  | protein_coding       |
| KDM4A    | HGNC | 22978 | protein_coding       |
| KDM4B    | HGNC | 29136 | protein_coding       |
| KDM5D    | HGNC | 11115 | protein_coding       |
| KDM6A    | HGNC | 12637 | protein_coding       |
| KDM7A    | HGNC | 22224 | protein_coding       |
| KDM7A    | HGNC | 22224 | protein_coding       |
| KDM7A    | HGNC | 22224 | protein_coding       |
| KIAA0930 | HGNC | 1314  | protein_coding       |
| KIAA1109 | HGNC | 26953 | protein_coding       |
| KIAA1244 | HGNC | 21213 | protein_coding       |
| KIAA1429 | HGNC | 24500 | protein_coding       |
| KIAA1683 | HGNC | 29350 | protein_coding       |
| KIAA1919 | HGNC | 21053 | protein_coding       |
| KIF14    | HGNC | 19181 | protein_coding       |
| KIF17    | HGNC | 19167 | protein_coding       |
| KIF19    | HGNC | 26735 | protein_coding       |
| KIF1A    | HGNC | 888   | protein_coding       |
| KIF1C    | HGNC | 6317  | protein_coding       |
| KIF20B   | HGNC | 7212  | protein_coding       |
| KIFAP3   | HGNC | 17060 | protein_coding       |
| KIN      | HGNC | 6327  | protein_coding       |



VEP annotated somatic variants

|           |      |       |                |
|-----------|------|-------|----------------|
| KLF10     | HGNC | 11810 | protein_coding |
| KLHL2     | HGNC | 6353  | protein_coding |
| KLHL8     | HGNC | 18644 | protein_coding |
| KLRG1     | HGNC | 6380  | protein_coding |
| KMT2C     | HGNC | 13726 | protein_coding |
| KNDC1     | HGNC | 29374 | protein_coding |
| KNTC1     | HGNC | 17255 | protein_coding |
| KPNA7     | HGNC | 21839 | protein_coding |
| KPNB1     | HGNC | 6400  | protein_coding |
| KREMEN1   | HGNC | 17550 | protein_coding |
| KRT10     | HGNC | 6413  | protein_coding |
| KRT32     | HGNC | 6449  | protein_coding |
| KRT36     | HGNC | 6454  | protein_coding |
| KRTAP10-9 | HGNC | 22971 | protein_coding |
| KRTAP12-3 | HGNC | 20531 | protein_coding |
| KRTAP12-4 | HGNC | 20532 | protein_coding |
| L3MBTL2   | HGNC | 18594 | protein_coding |
| LAMA2     | HGNC | 6482  | protein_coding |
| LAMA2     | HGNC | 6482  | protein_coding |
| LAMA4     | HGNC | 6484  | protein_coding |
| LAMA4     | HGNC | 6484  | protein_coding |
| LAMC1     | HGNC | 6492  | protein_coding |
| LAMC1     | HGNC | 6492  | protein_coding |
| LAMC1     | HGNC | 6492  | protein_coding |
| LAMC2     | HGNC | 6493  | protein_coding |
| LATS1     | HGNC | 6514  | protein_coding |
| LCE3C     | HGNC | 16612 | protein_coding |
| LCN8      | HGNC | 27038 | protein_coding |
| LDLRAD2   | HGNC | 32071 | protein_coding |
| LEMD3     | HGNC | 28887 | protein_coding |
| LFNG      | HGNC | 6560  | protein_coding |
| LILRA4    | HGNC | 15503 | protein_coding |
| LIMK1     | HGNC | 6613  | protein_coding |
| LINGO3    | HGNC | 21206 | protein_coding |
| LMBR1L    | HGNC | 18268 | protein_coding |
| LMO7      | HGNC | 6646  | protein_coding |
| LNPEP     | HGNC | 6656  | protein_coding |
| LONRF1    | HGNC | 26302 | protein_coding |
| LONRF3    | HGNC | 21152 | protein_coding |
| LONRF3    | HGNC | 21152 | protein_coding |
| LOXL1     | HGNC | 6665  | protein_coding |
| LPP       | HGNC | 6679  | protein_coding |
| LRMP      | HGNC | 6690  | protein_coding |
| LRP1B     | HGNC | 6693  | protein_coding |
| LRP5      | HGNC | 6697  | protein_coding |
| LRP5L     | HGNC | 25323 | protein_coding |
| LRP5L     | HGNC | 25323 | protein_coding |
| LRPAP1    | HGNC | 6701  | protein_coding |
| LRR1      | HGNC | 19742 | protein_coding |
| LRRC18    | HGNC | 23199 | protein_coding |
| LRRCC1    | HGNC | 29373 | protein_coding |
| LRRIQ1    | HGNC | 25708 | protein_coding |
| LSG1      | HGNC | 25652 | protein_coding |
| LSM14A    | HGNC | 24489 | protein_coding |
| LSM6      | HGNC | 17017 | protein_coding |

VEP annotated somatic variants

|          |      |       |                |
|----------|------|-------|----------------|
| LSS      | HGNC | 6708  | protein_coding |
| LTN1     | HGNC | 13082 | protein_coding |
| LUZP2    | HGNC | 23206 | protein_coding |
| LYPD4    | HGNC | 28659 | protein_coding |
| LYSMD1   | HGNC | 32070 | protein_coding |
| LZTS2    | HGNC | 29381 | protein_coding |
| LZTS2    | HGNC | 29381 | protein_coding |
| MAD1L1   | HGNC | 6762  | protein_coding |
| MAD2L1   | HGNC | 6763  | protein_coding |
| MAGEA1   | HGNC | 6796  | protein_coding |
| MAGEA12  | HGNC | 6799  | protein_coding |
| MAGEB4   | HGNC | 6811  | protein_coding |
| MAGEC1   | HGNC | 6812  | protein_coding |
| MAGEC2   | HGNC | 13574 | protein_coding |
| MAGED2   | HGNC | 16353 | protein_coding |
| MAMDC4   | HGNC | 24083 | protein_coding |
| MAMLD1   | HGNC | 2568  | protein_coding |
| MAN1A1   | HGNC | 6821  | protein_coding |
| MAN2A1   | HGNC | 6824  | protein_coding |
| MAN2B2   | HGNC | 29623 | protein_coding |
| MAP1S    | HGNC | 15715 | protein_coding |
| MAP3K15  | HGNC | 31689 | protein_coding |
| MAP3K3   | HGNC | 6855  | protein_coding |
| MAP4K1   | HGNC | 6863  | protein_coding |
| MAP4K4   | HGNC | 6866  | protein_coding |
| MAPKAPK3 | HGNC | 6888  | protein_coding |
| MAST1    | HGNC | 19034 | protein_coding |
| MAST1    | HGNC | 19034 | protein_coding |
| MAST4    | HGNC | 19037 | protein_coding |
| MATN4    | HGNC | 6910  | protein_coding |
| MCCC1    | HGNC | 6936  | protein_coding |
| MCM3AP   | HGNC | 6946  | protein_coding |
| MDGA1    | HGNC | 19267 | protein_coding |
| MDN1     | HGNC | 18302 | protein_coding |
| MDN1     | HGNC | 18302 | protein_coding |
| MECP2    | HGNC | 6990  | protein_coding |
| MED14    | HGNC | 2370  | protein_coding |
| MED22    | HGNC | 11477 | protein_coding |
| MED25    | HGNC | 28845 | protein_coding |
| MED29    | HGNC | 23074 | protein_coding |
| MEF2B    | HGNC | 6995  | protein_coding |
| MEGF6    | HGNC | 3232  | protein_coding |
| MEP1B    | HGNC | 7020  | protein_coding |
| MERTK    | HGNC | 7027  | protein_coding |
| METTL3   | HGNC | 17563 | protein_coding |
| METTL8   | HGNC | 25856 | protein_coding |
| MFSD12   | HGNC | 28299 | protein_coding |
| MGAT5B   | HGNC | 24140 | protein_coding |
| MGAT5B   | HGNC | 24140 | protein_coding |
| MGAT5B   | HGNC | 24140 | protein_coding |
| MGMT     | HGNC | 7059  | protein_coding |
| MICAL3   | HGNC | 24694 | protein_coding |
| MICAL3   | HGNC | 24694 | protein_coding |
| MICAL3   | HGNC | 24694 | protein_coding |
| MID1     | HGNC | 7095  | protein_coding |

VEP annotated somatic variants

|         |            |       |                |
|---------|------------|-------|----------------|
| MINK1   | HGNC       | 17565 | protein_coding |
| MINK1   | HGNC       | 17565 | protein_coding |
| MLEC    | HGNC       | 28973 | protein_coding |
| MLK4    | Uniprot_gn |       | protein_coding |
| MLLT1   | HGNC       | 7134  | protein_coding |
| MMP21   | HGNC       | 14357 | protein_coding |
| MNX1    | HGNC       | 4979  | protein_coding |
| MOB3A   | HGNC       | 29802 | protein_coding |
| MORC4   | HGNC       | 23485 | protein_coding |
| MORC4   | HGNC       | 23485 | protein_coding |
| MORF4L1 | HGNC       | 16989 | protein_coding |
| MPZL3   | HGNC       | 27279 | protein_coding |
| MRE11A  | HGNC       | 7230  | protein_coding |
| MROH7   | HGNC       | 24802 | protein_coding |
| MROH7   | HGNC       | 24802 | protein_coding |
| MROH7   | HGNC       | 24802 | protein_coding |
| MRPL10  | HGNC       | 14055 | protein_coding |
| MRPL41  | HGNC       | 14492 | protein_coding |
| MRPL43  | HGNC       | 14517 | protein_coding |
| MRPS10  | HGNC       | 14502 | protein_coding |
| MRVI1   | HGNC       | 7237  | protein_coding |
| MSH2    | HGNC       | 7325  | protein_coding |
| MSMO1   | HGNC       | 10545 | protein_coding |
| MTOR    | HGNC       | 3942  | protein_coding |
| MTR     | HGNC       | 7468  | protein_coding |
| MTR     | HGNC       | 7468  | protein_coding |
| MTR     | HGNC       | 7468  | protein_coding |
| MTR     | HGNC       | 7468  | protein_coding |
| MTTP    | HGNC       | 7467  | protein_coding |
| MUC16   | HGNC       | 15582 | protein_coding |
| MUC16   | HGNC       | 15582 | protein_coding |
| MUC19   | HGNC       | 14362 | protein_coding |
| MUC19   | HGNC       | 14362 | protein_coding |
| MUC2    | HGNC       | 7512  | protein_coding |
| MVD     | HGNC       | 7529  | protein_coding |
| MXRA5   | HGNC       | 7539  | protein_coding |
| MYADML2 | HGNC       | 34548 | protein_coding |
| MYBPC3  | HGNC       | 7551  | protein_coding |
| MYH11   | HGNC       | 7569  | protein_coding |
| MYH15   | HGNC       | 31073 | protein_coding |
| MYH7    | HGNC       | 7577  | protein_coding |
| MYH7    | HGNC       | 7577  | protein_coding |
| MYH7    | HGNC       | 7577  | protein_coding |
| MYH9    | HGNC       | 7579  | protein_coding |
| MYLK    | HGNC       | 7590  | protein_coding |
| MYO15A  | HGNC       | 7594  | protein_coding |
| MYO18B  | HGNC       | 18150 | protein_coding |
| MYO19   | HGNC       | 26234 | protein_coding |
| MYO1F   | HGNC       | 7600  | protein_coding |
| MYO5A   | HGNC       | 7602  | protein_coding |
| MYO9B   | HGNC       | 7609  | protein_coding |
| MYOG    | HGNC       | 7612  | protein_coding |
| MYPN    | HGNC       | 23246 | protein_coding |
| MYRF    | HGNC       | 1181  | protein_coding |
| MYSM1   | HGNC       | 29401 | protein_coding |

VEP annotated somatic variants

|          |      |       |                |
|----------|------|-------|----------------|
| NAA35    | HGNC | 24340 | protein_coding |
| NACC2    | HGNC | 23846 | protein_coding |
| NAGPA    | HGNC | 17378 | protein_coding |
| NAPSA    | HGNC | 13395 | protein_coding |
| NAT9     | HGNC | 23133 | protein_coding |
| NBAS     | HGNC | 15625 | protein_coding |
| NBR1     | HGNC | 6746  | protein_coding |
| NBR1     | HGNC | 6746  | protein_coding |
| NBR1     | HGNC | 6746  | protein_coding |
| NBR1     | HGNC | 6746  | protein_coding |
| NCAN     | HGNC | 2465  | protein_coding |
| NCAPD2   | HGNC | 24305 | protein_coding |
| NCAPD3   | HGNC | 28952 | protein_coding |
| NCAPH    | HGNC | 1112  | protein_coding |
| NCOA6    | HGNC | 15936 | protein_coding |
| NCOR1    | HGNC | 7672  | protein_coding |
| NDUFS2   | HGNC | 7708  | protein_coding |
| NEB      | HGNC | 7720  | protein_coding |
| NEB      | HGNC | 7720  | protein_coding |
| NEB      | HGNC | 7720  | protein_coding |
| NELFA    | HGNC | 12768 | protein_coding |
| NENF     | HGNC | 30384 | protein_coding |
| NENF     | HGNC | 30384 | protein_coding |
| NEXN     | HGNC | 29557 | protein_coding |
| NFKB1    | HGNC | 7794  | protein_coding |
| NFKB2    | HGNC | 7795  | protein_coding |
| NFKBIZ   | HGNC | 29805 | protein_coding |
| NHLRC1   | HGNC | 21576 | protein_coding |
| NHSL1    | HGNC | 21021 | protein_coding |
| NID1     | HGNC | 7821  | protein_coding |
| NIN      | HGNC | 14906 | protein_coding |
| NIPAL3   | HGNC | 25233 | protein_coding |
| NIPAL4   | HGNC | 28018 | protein_coding |
| NIPBL    | HGNC | 28862 | protein_coding |
| NIPSNAP1 | HGNC | 7827  | protein_coding |
| NISCH    | HGNC | 18006 | protein_coding |
| NKX2-8   | HGNC | 16364 | protein_coding |
| NLGN3    | HGNC | 14289 | protein_coding |
| NLRC4    | HGNC | 16412 | protein_coding |
| NLRP5    | HGNC | 21269 | protein_coding |
| NLRP5    | HGNC | 21269 | protein_coding |
| NLRP5    | HGNC | 21269 | protein_coding |
| NLRP9    | HGNC | 22941 | protein_coding |
| NOC4L    | HGNC | 28461 | protein_coding |
| NOL6     | HGNC | 19910 | protein_coding |
| NOP14    | HGNC | 16821 | protein_coding |
| NOP56    | HGNC | 15911 | protein_coding |
| NOS1AP   | HGNC | 16859 | protein_coding |
| NOS3     | HGNC | 7876  | protein_coding |
| NOS3     | HGNC | 7876  | protein_coding |
| NOTCH1   | HGNC | 7881  | protein_coding |
| NOTCH1   | HGNC | 7881  | protein_coding |
| NPC1L1   | HGNC | 7898  | protein_coding |
| NPFFR1   | HGNC | 17425 | protein_coding |
| NPSR1    | HGNC | 23631 | protein_coding |

VEP annotated somatic variants

|        |      |       |                |
|--------|------|-------|----------------|
| NPTX2  | HGNC | 7953  | protein_coding |
| NR1D2  | HGNC | 7963  | protein_coding |
| NR1I3  | HGNC | 7969  | protein_coding |
| NRDE2  | HGNC | 20186 | protein_coding |
| NSD1   | HGNC | 14234 | protein_coding |
| NSUN2  | HGNC | 25994 | protein_coding |
| NT5DC2 | HGNC | 25717 | protein_coding |
| NTF4   | HGNC | 8024  | protein_coding |
| NUDCD3 | HGNC | 22208 | protein_coding |
| NUFIP1 | HGNC | 8057  | protein_coding |
| NUGGC  | HGNC | 33550 | protein_coding |
| NUP107 | HGNC | 29914 | protein_coding |
| NUP214 | HGNC | 8064  | protein_coding |
| NUP43  | HGNC | 21182 | protein_coding |
| NUP50  | HGNC | 8065  | protein_coding |
| NUP54  | HGNC | 17359 | protein_coding |
| NUP54  | HGNC | 17359 | protein_coding |
| NUP88  | HGNC | 8067  | protein_coding |
| NUP88  | HGNC | 8067  | protein_coding |
| NXF3   | HGNC | 8073  | protein_coding |
| NXF5   | HGNC | 8075  | protein_coding |
| NXF5   | HGNC | 8075  | protein_coding |
| NXF5   | HGNC | 8075  | protein_coding |
| NXN    | HGNC | 18008 | protein_coding |
| OARD1  | HGNC | 21257 | protein_coding |
| OBSL1  | HGNC | 29092 | protein_coding |
| OGFOD3 | HGNC | 26174 | protein_coding |
| OPA3   | HGNC | 8142  | protein_coding |
| OR2AE1 | HGNC | 15087 | protein_coding |
| OR3A1  | HGNC | 8282  | protein_coding |
| OR4A16 | HGNC | 15153 | protein_coding |
| OR4A5  | HGNC | 15162 | protein_coding |
| OR4C16 | HGNC | 15172 | protein_coding |
| OR51B4 | HGNC | 14708 | protein_coding |
| OR52N1 | HGNC | 14853 | protein_coding |
| OR5AU1 | HGNC | 15362 | protein_coding |
| OR5H15 | HGNC | 31287 | protein_coding |
| OR5I1  | HGNC | 8347  | protein_coding |
| OR5T1  | HGNC | 14821 | protein_coding |
| OSBPL2 | HGNC | 15761 | protein_coding |
| OSGIN1 | HGNC | 30093 | protein_coding |
| OSGIN1 | HGNC | 30093 | protein_coding |
| OSMR   | HGNC | 8507  | protein_coding |
| OTUD7A | HGNC | 20718 | protein_coding |
| OXA1L  | HGNC | 8526  | protein_coding |
| P2RY4  | HGNC | 8542  | protein_coding |
| P4HB   | HGNC | 8548  | protein_coding |
| PABPC4 | HGNC | 8557  | protein_coding |
| PACS1  | HGNC | 30032 | protein_coding |
| PAGE5  | HGNC | 29992 | protein_coding |
| PALM   | HGNC | 8594  | protein_coding |
| PANK1  | HGNC | 8598  | protein_coding |
| PANK1  | HGNC | 8598  | protein_coding |
| PANK4  | HGNC | 19366 | protein_coding |
| PAPOLG | HGNC | 14982 | protein_coding |

## VEP annotated somatic variants

|         |      |       |                 |
|---------|------|-------|-----------------|
| PARS2   | HGNC | 30563 | protein_coding  |
| PARVA   | HGNC | 14652 | protein_coding  |
| PARVB   | HGNC | 14653 | protein_coding  |
| PAX8    | HGNC | 8622  | protein_coding  |
| PBOV1   | HGNC | 21079 | protein_coding  |
| PCDH15  | HGNC | 14674 | protein_coding  |
| PCDH9   | HGNC | 8661  | protein_coding  |
| PCLO    | HGNC | 13406 | protein_coding  |
| PCMT1   | HGNC | 8728  | protein_coding  |
| PCNT    | HGNC | 16068 | protein_coding  |
| PDE12   | HGNC | 25386 | protein_coding  |
| PDE1A   | HGNC | 8774  | protein_coding  |
| PDE2A   | HGNC | 8777  | protein_coding  |
| PDE6C   | HGNC | 8787  | protein_coding  |
| PDGFRA  | HGNC | 8803  | protein_coding  |
| PDGFRB  | HGNC | 8804  | protein_coding  |
| PDGFRB  | HGNC | 8804  | protein_coding  |
| PDSS1   | HGNC | 17759 | protein_coding  |
| PDXDC1  | HGNC | 28995 | protein_coding  |
| PDXDC1  | HGNC | 28995 | protein_coding  |
| PDZD7   | HGNC | 26257 | protein_coding  |
| PEAK1   | HGNC | 29431 | protein_coding  |
| PEAR1   | HGNC | 33631 | protein_coding  |
| PEAR1   | HGNC | 33631 | protein_coding  |
| PEAR1   | HGNC | 33631 | protein_coding  |
| PEPD    | HGNC | 8840  | protein_coding  |
| PEPD    | HGNC | 8840  | protein_coding  |
| PFKP    | HGNC | 8878  | protein_coding  |
| PFKP    | HGNC | 8878  | protein_coding  |
| PGAP1   | HGNC | 25712 | protein_coding  |
| PGK1    | HGNC | 8896  | protein_coding  |
| PGLYRP2 | HGNC | 30013 | protein_coding  |
| PGLYRP3 | HGNC | 30014 | protein_coding  |
| PHF2    | HGNC | 8920  | protein_coding  |
| PHIP    | HGNC | 15673 | protein_coding  |
| PHKA1   | HGNC | 8925  | protein_coding  |
| PHLDB1  | HGNC | 23697 | protein_coding  |
| PHRF1   | HGNC | 24351 | protein_coding  |
| PIFO    | HGNC | 27009 | protein_coding  |
| PIGK    | HGNC | 8965  | protein_coding  |
| PIGN    | HGNC | 8967  | protein_coding  |
| PIGW    | HGNC | 23213 | protein_coding  |
| PIK3R5  | HGNC | 30035 | protein_coding  |
| PIKFYVE | HGNC | 23785 | protein_coding  |
| PIM3    | HGNC | 19310 | protein_coding  |
| PIWIL3  | HGNC | 18443 | protein_coding  |
| PJA1    | HGNC | 16648 | protein_coding  |
| PKD1L2  | HGNC | 21715 | retained_intron |
| PKHD1   | HGNC | 9016  | protein_coding  |
| PKP2    | HGNC | 9024  | protein_coding  |
| PLA2G7  | HGNC | 9040  | protein_coding  |
| PLAT    | HGNC | 9051  | protein_coding  |
| PLB1    | HGNC | 30041 | protein_coding  |
| PLCE1   | HGNC | 17175 | protein_coding  |
| PLCE1   | HGNC | 17175 | protein_coding  |

VEP annotated somatic variants

|              |      |       |                |
|--------------|------|-------|----------------|
| PLCE1        | HGNC | 17175 | protein_coding |
| PLCE1        | HGNC | 17175 | protein_coding |
| PLCG2        | HGNC | 9066  | protein_coding |
| PLCH2        | HGNC | 29037 | protein_coding |
| PLCH2        | HGNC | 29037 | protein_coding |
| PLEC         | HGNC | 9069  | protein_coding |
| PLEC         | HGNC | 9069  | protein_coding |
| PLEC         | HGNC | 9069  | protein_coding |
| PLEC         | HGNC | 9069  | protein_coding |
| PLEC         | HGNC | 9069  | protein_coding |
| PLEC         | HGNC | 9069  | protein_coding |
| PLEKHG5      | HGNC | 29105 | protein_coding |
| PLEKHH1      | HGNC | 17733 | protein_coding |
| PLEKHH1      | HGNC | 17733 | protein_coding |
| PLEKHH1      | HGNC | 17733 | protein_coding |
| PLEKHN1      | HGNC | 25284 | protein_coding |
| PLK5         | HGNC | 27001 | protein_coding |
| PLXDC1       | HGNC | 20945 | protein_coding |
| PLXNB2       | HGNC | 9104  | protein_coding |
| PNISR        | HGNC | 21222 | protein_coding |
| PNPLA1       | HGNC | 21246 | protein_coding |
| PNPLA3       | HGNC | 18590 | protein_coding |
| PNPLA6       | HGNC | 16268 | protein_coding |
| POC1B-GALNT4 | HGNC | 42957 | protein_coding |
| POLR2G       | HGNC | 9194  | protein_coding |
| POLR3F       | HGNC | 15763 | protein_coding |
| POLR3F       | HGNC | 15763 | protein_coding |
| POSTN        | HGNC | 16953 | protein_coding |
| POU5F1B      | HGNC | 9223  | protein_coding |
| PPARG        | HGNC | 9236  | protein_coding |
| PPARG        | HGNC | 9236  | protein_coding |
| PPIL2        | HGNC | 9261  | protein_coding |
| PPM1E        | HGNC | 19322 | protein_coding |
| PPOX         | HGNC | 9280  | protein_coding |
| PPP1R27      | HGNC | 16813 | protein_coding |
| PPP2R2D      | HGNC | 23732 | protein_coding |
| PPP2R3A      | HGNC | 9307  | protein_coding |
| PQBP1        | HGNC | 9330  | protein_coding |
| PRDM5        | HGNC | 9349  | protein_coding |
| PRDM8        | HGNC | 13993 | protein_coding |
| PRDX4        | HGNC | 17169 | protein_coding |
| PRDX4        | HGNC | 17169 | protein_coding |
| PRDX4        | HGNC | 17169 | protein_coding |
| PREP         | HGNC | 9358  | protein_coding |
| PREX2        | HGNC | 22950 | protein_coding |
| PRG2         | HGNC | 9362  | protein_coding |
| PRIMPOL      | HGNC | 26575 | protein_coding |
| PRKCD        | HGNC | 9399  | protein_coding |
| PRKCD        | HGNC | 9399  | protein_coding |
| PRKCZ        | HGNC | 9412  | protein_coding |
| PRMT5        | HGNC | 10894 | protein_coding |
| PRR22        | HGNC | 28354 | protein_coding |
| PRR5         | HGNC | 31682 | protein_coding |
| PRR5-ARHGAP8 | HGNC | 34512 | protein_coding |
| PRSS36       | HGNC | 26906 | protein_coding |

VEP annotated somatic variants

|           |      |       |                        |
|-----------|------|-------|------------------------|
| PRUNE2    | HGNC | 25209 | protein_coding         |
| PSG2      | HGNC | 9519  | protein_coding         |
| PSG7      | HGNC | 9524  | polymorphic_pseudogene |
| PSG9      | HGNC | 9526  | protein_coding         |
| PSMD12    | HGNC | 9557  | protein_coding         |
| PSMG1     | HGNC | 3043  | protein_coding         |
| PSMG2     | HGNC | 24929 | protein_coding         |
| PTGR1     | HGNC | 18429 | protein_coding         |
| PTPRE     | HGNC | 9669  | protein_coding         |
| PTPRF     | HGNC | 9670  | protein_coding         |
| PTPRG     | HGNC | 9671  | protein_coding         |
| PTPRK     | HGNC | 9674  | protein_coding         |
| PTPRN2    | HGNC | 9677  | protein_coding         |
| PTX4      | HGNC | 14171 | protein_coding         |
| PUM1      | HGNC | 14957 | protein_coding         |
| PUM1      | HGNC | 14957 | protein_coding         |
| PUM1      | HGNC | 14957 | protein_coding         |
| PUM1      | HGNC | 14957 | protein_coding         |
| PYGO1     | HGNC | 30256 | protein_coding         |
| PYROXD1   | HGNC | 26162 | protein_coding         |
| RAB11FIP4 | HGNC | 30267 | protein_coding         |
| RAB17     | HGNC | 16523 | protein_coding         |
| RAB38     | HGNC | 9776  | protein_coding         |
| RAB41     | HGNC | 18293 | protein_coding         |
| RABEP1    | HGNC | 17677 | protein_coding         |
| RABGGTA   | HGNC | 9795  | protein_coding         |
| RAC3      | HGNC | 9803  | protein_coding         |
| RAD51B    | HGNC | 9822  | protein_coding         |
| RADIL     | HGNC | 22226 | protein_coding         |
| RAF1      | HGNC | 9829  | protein_coding         |
| RAI14     | HGNC | 14873 | protein_coding         |
| RAP1GAP   | HGNC | 9858  | protein_coding         |
| RAPGEF3   | HGNC | 16629 | protein_coding         |
| RAPSN     | HGNC | 9863  | protein_coding         |
| RASSF1    | HGNC | 9882  | protein_coding         |
| RBM10     | HGNC | 9896  | protein_coding         |
| RBM26     | HGNC | 20327 | protein_coding         |
| RBM27     | HGNC | 29243 | protein_coding         |
| RBPMS     | HGNC | 19097 | protein_coding         |
| RECK      | HGNC | 11345 | protein_coding         |
| RELB      | HGNC | 9956  | protein_coding         |
| REPS1     | HGNC | 15578 | protein_coding         |
| RETNLB    | HGNC | 20388 | protein_coding         |
| RFPL1     | HGNC | 9977  | protein_coding         |
| RFT1      | HGNC | 30220 | protein_coding         |
| RFT1      | HGNC | 30220 | protein_coding         |
| RFTN1     | HGNC | 30278 | protein_coding         |
| RGL3      | HGNC | 30282 | protein_coding         |
| RGS7      | HGNC | 10003 | protein_coding         |
| RIBC2     | HGNC | 13241 | protein_coding         |
| RIPK4     | HGNC | 496   | protein_coding         |
| RMND5A    | HGNC | 25850 | protein_coding         |
| RMND5A    | HGNC | 25850 | protein_coding         |
| RNASEH2A  | HGNC | 18518 | protein_coding         |
| RNASEL    | HGNC | 10050 | protein_coding         |



VEP annotated somatic variants

|               |                       |       |                               |
|---------------|-----------------------|-------|-------------------------------|
| RND2          | HGNC                  | 18315 | protein_coding                |
| RNF175        | HGNC                  | 27735 | protein_coding                |
| RNF19B        | HGNC                  | 26886 | protein_coding                |
| RNF222        | HGNC                  | 34517 | protein_coding                |
| ROBO1         | HGNC                  | 10249 | protein_coding                |
| ROBO1         | HGNC                  | 10249 | protein_coding                |
| ROCK2         | HGNC                  | 10252 | protein_coding                |
| ROR1          | HGNC                  | 10256 | protein_coding                |
| ROS1          | HGNC                  | 10261 | protein_coding                |
| RP1-130H16.18 | Clone_based_vega_gene |       | protein_coding                |
| RP11-173B14.4 | Clone_based_vega_gene |       | sense_intronic                |
| RP11-248J23.6 | Clone_based_vega_gene |       | protein_coding                |
| RP11-551L14.1 | Clone_based_vega_gene |       | transcribed_unprocessed_pseud |
| RP3-467K16.2  | Clone_based_vega_gene |       | antisense                     |
| RPAP3         | HGNC                  | 26151 | protein_coding                |
| RPH3AL        | HGNC                  | 10296 | protein_coding                |
| RPL18A        | HGNC                  | 10311 | protein_coding                |
| RPL23A        | HGNC                  | 10317 | protein_coding                |
| RPL23A        | HGNC                  | 10317 | protein_coding                |
| RPL3          | HGNC                  | 10332 | protein_coding                |
| RPS4X         | HGNC                  | 10424 | protein_coding                |
| RPS6KA2       | HGNC                  | 10431 | protein_coding                |
| RPTOR         | HGNC                  | 30287 | protein_coding                |
| RPTOR         | HGNC                  | 30287 | protein_coding                |
| RRP1B         | HGNC                  | 23818 | protein_coding                |
| RRP1B         | HGNC                  | 23818 | protein_coding                |
| RSAD1         | HGNC                  | 25634 | protein_coding                |
| RSU1          | HGNC                  | 10464 | protein_coding                |
| RTN3          | HGNC                  | 10469 | protein_coding                |
| RUFY1         | HGNC                  | 19760 | protein_coding                |
| RUFY1         | HGNC                  | 19760 | protein_coding                |
| RUFY2         | HGNC                  | 19761 | protein_coding                |
| RXRA          | HGNC                  | 10477 | protein_coding                |
| RYR1          | HGNC                  | 10483 | protein_coding                |
| RYR1          | HGNC                  | 10483 | protein_coding                |
| RYR1          | HGNC                  | 10483 | protein_coding                |
| RYR1          | HGNC                  | 10483 | protein_coding                |
| RYR2          | HGNC                  | 10484 | protein_coding                |
| RYR2          | HGNC                  | 10484 | protein_coding                |
| RYR3          | HGNC                  | 10485 | protein_coding                |
| SAP18         | HGNC                  | 10530 | protein_coding                |
| SARDH         | HGNC                  | 10536 | protein_coding                |
| SBDS          | HGNC                  | 19440 | protein_coding                |
| SBF1          | HGNC                  | 10542 | protein_coding                |
| SBF2          | HGNC                  | 2135  | protein_coding                |
| SCAF1         | HGNC                  | 30403 | protein_coding                |
| SCAMP3        | HGNC                  | 10565 | protein_coding                |
| SCARF2        | HGNC                  | 19869 | protein_coding                |
| SCEL          | HGNC                  | 10573 | protein_coding                |
| SCIN          | HGNC                  | 21695 | protein_coding                |
| SCLT1         | HGNC                  | 26406 | protein_coding                |
| SCLT1         | HGNC                  | 26406 | protein_coding                |
| SCML4         | HGNC                  | 21397 | protein_coding                |
| SCN3A         | HGNC                  | 10590 | protein_coding                |
| SCN9A         | HGNC                  | 10597 | protein_coding                |

VEP annotated somatic variants

|          |      |       |                |
|----------|------|-------|----------------|
| SCN9A    | HGNC | 10597 | protein_coding |
| SDE2     | HGNC | 26643 | protein_coding |
| SDK1     | HGNC | 19307 | protein_coding |
| SEC13    | HGNC | 10697 | protein_coding |
| SEC14L6  | HGNC | 40047 | protein_coding |
| SEC16B   | HGNC | 30301 | protein_coding |
| SEC23B   | HGNC | 10702 | protein_coding |
| SEC24D   | HGNC | 10706 | protein_coding |
| SEC31B   | HGNC | 23197 | protein_coding |
| SEC31B   | HGNC | 23197 | protein_coding |
| SEC31B   | HGNC | 23197 | protein_coding |
| SEC31B   | HGNC | 23197 | protein_coding |
| SECISBP2 | HGNC | 30972 | protein_coding |
| SECTM1   | HGNC | 10707 | protein_coding |
| SELE     | HGNC | 10718 | protein_coding |
| SELP     | HGNC | 10721 | protein_coding |
| SEMA3A   | HGNC | 10723 | protein_coding |
| SEMA3A   | HGNC | 10723 | protein_coding |
| SEMA3F   | HGNC | 10728 | protein_coding |
| SEPT3    | HGNC | 10750 | protein_coding |
| SERPINA3 | HGNC | 16    | protein_coding |
| SERTAD1  | HGNC | 17932 | protein_coding |
| SETD1B   | HGNC | 29187 | protein_coding |
| SETD1B   | HGNC | 29187 | protein_coding |
| SETD5    | HGNC | 25566 | protein_coding |
| SEZ6L    | HGNC | 10763 | protein_coding |
| SF3B3    | HGNC | 10770 | protein_coding |
| SF3B5    | HGNC | 21083 | protein_coding |
| SGPL1    | HGNC | 10817 | protein_coding |
| SGSM2    | HGNC | 29026 | protein_coding |
| SGSM2    | HGNC | 29026 | protein_coding |
| SGSM3    | HGNC | 25228 | protein_coding |
| SH3GLB1  | HGNC | 10833 | protein_coding |
| SH3PXD2A | HGNC | 23664 | protein_coding |
| SHANK1   | HGNC | 15474 | protein_coding |
| SHANK1   | HGNC | 15474 | protein_coding |
| SHH      | HGNC | 10848 | protein_coding |
| SHROOM2  | HGNC | 630   | protein_coding |
| SIGLEC12 | HGNC | 15482 | protein_coding |
| SIK1     | HGNC | 11142 | protein_coding |
| SIM2     | HGNC | 10883 | protein_coding |
| SIPA1L2  | HGNC | 23800 | protein_coding |
| SLAMF7   | HGNC | 21394 | protein_coding |
| SLC10A4  | HGNC | 22980 | protein_coding |
| SLC10A6  | HGNC | 30603 | protein_coding |
| SLC12A7  | HGNC | 10915 | protein_coding |
| SLC13A1  | HGNC | 10916 | protein_coding |
| SLC16A2  | HGNC | 10923 | protein_coding |
| SLC1A6   | HGNC | 10944 | protein_coding |
| SLC1A6   | HGNC | 10944 | protein_coding |
| SLC22A5  | HGNC | 10969 | protein_coding |
| SLC23A1  | HGNC | 10974 | protein_coding |
| SLC24A4  | HGNC | 10978 | protein_coding |
| SLC25A13 | HGNC | 10983 | protein_coding |
| SLC25A39 | HGNC | 24279 | protein_coding |

VEP annotated somatic variants

|            |      |       |                      |
|------------|------|-------|----------------------|
| SLC25A39   | HGNC | 24279 | protein_coding       |
| SLC26A11   | HGNC | 14471 | protein_coding       |
| SLC28A1    | HGNC | 11001 | protein_coding       |
| SLC28A2    | HGNC | 11002 | protein_coding       |
| SLC2A8     | HGNC | 13812 | protein_coding       |
| SLC35B4    | HGNC | 20584 | protein_coding       |
| SLC35F1    | HGNC | 21483 | protein_coding       |
| SLC35F3    | HGNC | 23616 | protein_coding       |
| SLC37A2    | HGNC | 20644 | protein_coding       |
| SLC38A3    | HGNC | 18044 | processed_transcript |
| SLC38A7    | HGNC | 25582 | protein_coding       |
| SLC45A4    | HGNC | 29196 | protein_coding       |
| SLC4A2     | HGNC | 11028 | protein_coding       |
| SLC5A5     | HGNC | 11040 | protein_coding       |
| SLC6A14    | HGNC | 11047 | protein_coding       |
| SLC6A16    | HGNC | 13622 | protein_coding       |
| SLC6A4     | HGNC | 11050 | protein_coding       |
| SLC6A9     | HGNC | 11056 | protein_coding       |
| SLC7A8     | HGNC | 11066 | protein_coding       |
| SLC7A8     | HGNC | 11066 | protein_coding       |
| SLC9A7     | HGNC | 17123 | protein_coding       |
| SLCO2A1    | HGNC | 10955 | protein_coding       |
| SMARCA1    | HGNC | 11097 | protein_coding       |
| SMARCA5    | HGNC | 11101 | protein_coding       |
| SMC1B      | HGNC | 11112 | protein_coding       |
| SMOC1      | HGNC | 20318 | protein_coding       |
| SMTN       | HGNC | 11126 | protein_coding       |
| SMYD3      | HGNC | 15513 | protein_coding       |
| SORBS1     | HGNC | 14565 | protein_coding       |
| SORCS2     | HGNC | 16698 | protein_coding       |
| SPAG17     | HGNC | 26620 | protein_coding       |
| SPAG17     | HGNC | 26620 | protein_coding       |
| SPANXN2    | HGNC | 33175 | protein_coding       |
| SPATC1     | HGNC | 30510 | protein_coding       |
| SPEG       | HGNC | 16901 | protein_coding       |
| SPEG       | HGNC | 16901 | protein_coding       |
| SPINT2     | HGNC | 11247 | protein_coding       |
| SPOCK2     | HGNC | 13564 | protein_coding       |
| SPTBN5     | HGNC | 15680 | protein_coding       |
| SPTBN5     | HGNC | 15680 | protein_coding       |
| SRCAP      | HGNC | 16974 | protein_coding       |
| SSPO       | HGNC | 21998 | processed_transcript |
| SSPO       | HGNC | 21998 | processed_transcript |
| SSPO       | HGNC | 21998 | processed_transcript |
| SSUH2      | HGNC | 24809 | protein_coding       |
| ST3GAL2    | HGNC | 10863 | protein_coding       |
| ST6GALNAC2 | HGNC | 10867 | protein_coding       |
| ST6GALNAC2 | HGNC | 10867 | protein_coding       |
| ST6GALNAC4 | HGNC | 17846 | protein_coding       |
| STAB2      | HGNC | 18629 | protein_coding       |
| STAMPB     | HGNC | 16950 | protein_coding       |
| STAP1      | HGNC | 24133 | protein_coding       |
| STARD9     | HGNC | 19162 | protein_coding       |
| STAT4      | HGNC | 11365 | protein_coding       |
| STAT5B     | HGNC | 11367 | protein_coding       |

VEP annotated somatic variants

|          |      |       |                      |
|----------|------|-------|----------------------|
| STAU2    | HGNC | 11371 | protein_coding       |
| STOML1   | HGNC | 14560 | protein_coding       |
| STRA13   | HGNC | 11422 | protein_coding       |
| STRA8    | HGNC | 30653 | protein_coding       |
| STRBP    | HGNC | 16462 | protein_coding       |
| STRIP1   | HGNC | 25916 | protein_coding       |
| STRIP2   | HGNC | 22209 | protein_coding       |
| STXBP5   | HGNC | 19665 | protein_coding       |
| STYK1    | HGNC | 18889 | protein_coding       |
| STYXL1   | HGNC | 18165 | protein_coding       |
| SUCNR1   | HGNC | 4542  | protein_coding       |
| SUMO3    | HGNC | 11124 | protein_coding       |
| SUMO4    | HGNC | 21181 | protein_coding       |
| SUPT5H   | HGNC | 11469 | protein_coding       |
| SUPT5H   | HGNC | 11469 | protein_coding       |
| SUSD3    | HGNC | 28391 | protein_coding       |
| SWAP70   | HGNC | 17070 | protein_coding       |
| SYMPK    | HGNC | 22935 | protein_coding       |
| SYN2     | HGNC | 11495 | processed_transcript |
| SYNE2    | HGNC | 17084 | protein_coding       |
| SYNE2    | HGNC | 17084 | protein_coding       |
| SYNJ2    | HGNC | 11504 | protein_coding       |
| SYNM     | HGNC | 24466 | protein_coding       |
| SYNPO2   | HGNC | 17732 | protein_coding       |
| TAB2     | HGNC | 17075 | protein_coding       |
| TAB2     | HGNC | 17075 | protein_coding       |
| TACC3    | HGNC | 11524 | protein_coding       |
| TAF7L    | HGNC | 11548 | protein_coding       |
| TAGAP    | HGNC | 15669 | protein_coding       |
| TAGAP    | HGNC | 15669 | protein_coding       |
| TARSL2   | HGNC | 24728 | protein_coding       |
| TARSL2   | HGNC | 24728 | protein_coding       |
| TATDN2   | HGNC | 28988 | protein_coding       |
| TATDN2   | HGNC | 28988 | protein_coding       |
| TBC1D22A | HGNC | 1309  | protein_coding       |
| TBC1D4   | HGNC | 19165 | protein_coding       |
| TBC1D5   | HGNC | 19166 | protein_coding       |
| TBCK     | HGNC | 28261 | protein_coding       |
| TBX10    | HGNC | 11593 | protein_coding       |
| TCEAL2   | HGNC | 29818 | protein_coding       |
| TCEB3    | HGNC | 11620 | protein_coding       |
| TCERG1   | HGNC | 15630 | protein_coding       |
| TCN2     | HGNC | 11653 | protein_coding       |
| TDRD9    | HGNC | 20122 | protein_coding       |
| TENM1    | HGNC | 8117  | protein_coding       |
| TENM2    | HGNC | 29943 | protein_coding       |
| TERF2    | HGNC | 11729 | protein_coding       |
| TET3     | HGNC | 28313 | protein_coding       |
| TEX14    | HGNC | 11737 | protein_coding       |
| TEX2     | HGNC | 30884 | protein_coding       |
| TEX26    | HGNC | 28622 | protein_coding       |
| TFB1M    | HGNC | 17037 | protein_coding       |
| TFDP3    | HGNC | 24603 | protein_coding       |
| TFPT     | HGNC | 13630 | protein_coding       |
| TGFBR3   | HGNC | 11774 | protein_coding       |

VEP annotated somatic variants

|           |      |       |                |
|-----------|------|-------|----------------|
| TGIF2LX   | HGNC | 18570 | protein_coding |
| TGM7      | HGNC | 30790 | protein_coding |
| THBS2     | HGNC | 11786 | protein_coding |
| THEG      | HGNC | 13706 | protein_coding |
| THSD7A    | HGNC | 22207 | protein_coding |
| THTPA     | HGNC | 18987 | protein_coding |
| THUMPD2   | HGNC | 14890 | protein_coding |
| TIAM1     | HGNC | 11805 | protein_coding |
| TIAM2     | HGNC | 11806 | protein_coding |
| TICAM1    | HGNC | 18348 | protein_coding |
| TIMM21    | HGNC | 25010 | protein_coding |
| TKT       | HGNC | 11834 | protein_coding |
| TKT       | HGNC | 11834 | protein_coding |
| TLCD1     | HGNC | 25177 | protein_coding |
| TLE3      | HGNC | 11839 | protein_coding |
| TLE3      | HGNC | 11839 | protein_coding |
| TLK2      | HGNC | 11842 | protein_coding |
| TLL1      | HGNC | 11843 | protein_coding |
| TLL2      | HGNC | 11844 | protein_coding |
| TLL2      | HGNC | 11844 | protein_coding |
| TLL2      | HGNC | 11844 | protein_coding |
| TLN2      | HGNC | 15447 | protein_coding |
| TLX2      | HGNC | 5057  | protein_coding |
| TMED6     | HGNC | 28331 | protein_coding |
| TMEM131   | HGNC | 30366 | protein_coding |
| TMEM140   | HGNC | 21870 | protein_coding |
| TMEM150C  | HGNC | 37263 | protein_coding |
| TMEM185A  | HGNC | 17125 | protein_coding |
| TMEM216   | HGNC | 25018 | protein_coding |
| TMEM220   | HGNC | 33757 | protein_coding |
| TMPRSS11A | HGNC | 27954 | protein_coding |
| TNFAIP3   | HGNC | 11896 | protein_coding |
| TNFSF8    | HGNC | 11938 | protein_coding |
| TNRC18    | HGNC | 11962 | protein_coding |
| TNS4      | HGNC | 24352 | protein_coding |
| TNS4      | HGNC | 24352 | protein_coding |
| TP53BP1   | HGNC | 11999 | protein_coding |
| TP53BP1   | HGNC | 11999 | protein_coding |
| TP53BP1   | HGNC | 11999 | protein_coding |
| TPGS2     | HGNC | 24561 | protein_coding |
| TPM4      | HGNC | 12013 | protein_coding |
| TPPP      | HGNC | 24164 | protein_coding |
| TPPP      | HGNC | 24164 | protein_coding |
| TPRG1     | HGNC | 24759 | protein_coding |
| TRAPPC6A  | HGNC | 23069 | protein_coding |
| TRAPPC6B  | HGNC | 23066 | protein_coding |
| TRAPPC6B  | HGNC | 23066 | protein_coding |
| TRERF1    | HGNC | 18273 | protein_coding |
| TREX2     | HGNC | 12270 | protein_coding |
| TRIM15    | HGNC | 16284 | protein_coding |
| TRIM27    | HGNC | 9975  | protein_coding |
| TRIM46    | HGNC | 19019 | protein_coding |
| TRIM62    | HGNC | 25574 | protein_coding |
| TRIM67    | HGNC | 31859 | protein_coding |
| TRIM9     | HGNC | 16288 | protein_coding |

VEP annotated somatic variants

|         |      |       |                      |
|---------|------|-------|----------------------|
| TRIM9   | HGNC | 16288 | protein_coding       |
| TRIO    | HGNC | 12303 | protein_coding       |
| TRIP6   | HGNC | 12311 | protein_coding       |
| TRMT1   | HGNC | 25980 | protein_coding       |
| TRMT2B  | HGNC | 25748 | protein_coding       |
| TRPC4AP | HGNC | 16181 | protein_coding       |
| TRPM1   | HGNC | 7146  | protein_coding       |
| TRPM5   | HGNC | 14323 | protein_coding       |
| TRPM7   | HGNC | 17994 | protein_coding       |
| TRPV4   | HGNC | 18083 | protein_coding       |
| TSC1    | HGNC | 12362 | protein_coding       |
| TSC1    | HGNC | 12362 | protein_coding       |
| TSC2    | HGNC | 12363 | protein_coding       |
| TSPAN1  | HGNC | 20657 | protein_coding       |
| TSPAN6  | HGNC | 11858 | protein_coding       |
| TSPAN7  | HGNC | 11854 | protein_coding       |
| TSSK2   | HGNC | 11401 | protein_coding       |
| TTBK1   | HGNC | 19140 | protein_coding       |
| TTBK1   | HGNC | 19140 | protein_coding       |
| TTC18   | HGNC | 30726 | protein_coding       |
| TTC19   | HGNC | 26006 | protein_coding       |
| TTC28   | HGNC | 29179 | protein_coding       |
| TTC40   | HGNC | 25247 | protein_coding       |
| TTC40   | HGNC | 25247 | protein_coding       |
| TTC40   | HGNC | 25247 | protein_coding       |
| TTC40   | HGNC | 25247 | protein_coding       |
| TTC40   | HGNC | 25247 | protein_coding       |
| TLL1    | HGNC | 1312  | protein_coding       |
| TLL6    | HGNC | 26664 | protein_coding       |
| TUB     | HGNC | 12406 | protein_coding       |
| TUBGCP5 | HGNC | 18600 | protein_coding       |
| TUBGCP6 | HGNC | 18127 | protein_coding       |
| TULP4   | HGNC | 15530 | protein_coding       |
| TULP4   | HGNC | 15530 | protein_coding       |
| TWF1    | HGNC | 9620  | protein_coding       |
| TYMP    | HGNC | 3148  | protein_coding       |
| UBASH3A | HGNC | 12462 | protein_coding       |
| UBASH3B | HGNC | 29884 | protein_coding       |
| UBE3C   | HGNC | 16803 | protein_coding       |
| UBR4    | HGNC | 30313 | protein_coding       |
| UBXN2B  | HGNC | 27035 | protein_coding       |
| UCP3    | HGNC | 12519 | protein_coding       |
| UHRF1   | HGNC | 12556 | processed_transcript |
| UHRF2   | HGNC | 12557 | protein_coding       |
| ULK4    | HGNC | 15784 | protein_coding       |
| UMODL1  | HGNC | 12560 | protein_coding       |
| UMODL1  | HGNC | 12560 | protein_coding       |
| UMODL1  | HGNC | 12560 | protein_coding       |
| UNC45B  | HGNC | 14304 | protein_coding       |
| UNKL    | HGNC | 14184 | protein_coding       |
|         |      |       |                      |
| UPB1    | HGNC | 16297 | protein_coding       |
| UPRT    | HGNC | 28334 | protein_coding       |
| USH2A   | HGNC | 12601 | protein_coding       |
| USHBP1  | HGNC | 24058 | protein_coding       |

VEP annotated somatic variants

|         |      |       |                |
|---------|------|-------|----------------|
| USP10   | HGNC | 12608 | protein_coding |
| USP11   | HGNC | 12609 | protein_coding |
| USP18   | HGNC | 12616 | protein_coding |
| USP20   | HGNC | 12619 | protein_coding |
| USP22   | HGNC | 12621 | protein_coding |
| USP34   | HGNC | 20066 | protein_coding |
| UTP15   | HGNC | 25758 | protein_coding |
| UTP20   | HGNC | 17897 | protein_coding |
| UTP20   | HGNC | 17897 | protein_coding |
| UTY     | HGNC | 12638 | protein_coding |
| VIM     | HGNC | 12692 | protein_coding |
| VIPR2   | HGNC | 12695 | protein_coding |
| VRK2    | HGNC | 12719 | protein_coding |
| VTI1B   | HGNC | 17793 | protein_coding |
| WBSCR22 | HGNC | 16405 | protein_coding |
| WBSCR22 | HGNC | 16405 | protein_coding |
| WBSCR27 | HGNC | 19068 | protein_coding |
| WDFY4   | HGNC | 29323 | protein_coding |
| WDR11   | HGNC | 13831 | protein_coding |
| WDR11   | HGNC | 13831 | protein_coding |
| WDR11   | HGNC | 13831 | protein_coding |
| WDR11   | HGNC | 13831 | protein_coding |
| WDR11   | HGNC | 13831 | protein_coding |
| WDR17   | HGNC | 16661 | protein_coding |
| WDR26   | HGNC | 21208 | protein_coding |
| WDR43   | HGNC | 28945 | protein_coding |
| WDR48   | HGNC | 30914 | protein_coding |
| WDR60   | HGNC | 21862 | protein_coding |
| WDR87   | HGNC | 29934 | protein_coding |
| WDR91   | HGNC | 24997 | protein_coding |
| WIPI2   | HGNC | 32225 | protein_coding |
| WNK1    | HGNC | 14540 | protein_coding |
| WNT2B   | HGNC | 12781 | protein_coding |
| WNT8B   | HGNC | 12789 | protein_coding |
| WRNIP1  | HGNC | 20876 | protein_coding |
| WSB2    | HGNC | 19222 | protein_coding |
| WWC1    | HGNC | 29435 | protein_coding |
| WWP2    | HGNC | 16804 | protein_coding |
| XAB2    | HGNC | 14089 | protein_coding |
| XKR8    | HGNC | 25508 | protein_coding |
| XPNPEP1 | HGNC | 12822 | protein_coding |
| XPNPEP3 | HGNC | 28052 | protein_coding |
| XPO5    | HGNC | 17675 | protein_coding |
| XRCC1   | HGNC | 12828 | protein_coding |
| XRCC1   | HGNC | 12828 | protein_coding |
| YBX2    | HGNC | 17948 | protein_coding |
| YY1AP1  | HGNC | 30935 | protein_coding |
| YY1AP1  | HGNC | 30935 | protein_coding |
| ZBTB2   | HGNC | 20868 | protein_coding |
| ZC2HC1B | HGNC | 21174 | protein_coding |
| ZC3H12D | HGNC | 21175 | protein_coding |
| ZC3H12D | HGNC | 21175 | protein_coding |
| ZC3H12D | HGNC | 21175 | protein_coding |
| ZC3H3   | HGNC | 28972 | protein_coding |
| ZC3H7B  | HGNC | 30869 | protein_coding |

VEP annotated somatic variants

|         |      |       |                |
|---------|------|-------|----------------|
| ZCCHC18 | HGNC | 32459 | protein_coding |
| ZDHHC16 | HGNC | 20714 | protein_coding |
| ZDHHC6  | HGNC | 19160 | protein_coding |
| ZDHHC7  | HGNC | 18459 | protein_coding |
| ZFAND2A | HGNC | 28073 | protein_coding |
| ZFHX2   | HGNC | 20152 | protein_coding |
| ZFPM2   | HGNC | 16700 | protein_coding |
| ZFYVE19 | HGNC | 20758 | protein_coding |
| ZKSCAN5 | HGNC | 12867 | protein_coding |
| ZMYND10 | HGNC | 19412 | protein_coding |
| ZMYND10 | HGNC | 19412 | protein_coding |
| ZNF185  | HGNC | 12976 | protein_coding |
| ZNF275  | HGNC | 13069 | protein_coding |
| ZNF304  | HGNC | 13505 | protein_coding |
| ZNF324  | HGNC | 14096 | protein_coding |
| ZNF365  | HGNC | 18194 | protein_coding |
| ZNF414  | HGNC | 20630 | protein_coding |
| ZNF420  | HGNC | 20649 | protein_coding |
| ZNF432  | HGNC | 20810 | protein_coding |
| ZNF441  | HGNC | 20875 | protein_coding |
| ZNF449  | HGNC | 21039 | protein_coding |
| ZNF493  | HGNC | 23708 | protein_coding |
| ZNF512B | HGNC | 29212 | protein_coding |
| ZNF592  | HGNC | 28986 | protein_coding |
| ZNF598  | HGNC | 28079 | protein_coding |
| ZNF614  | HGNC | 24722 | protein_coding |
| ZNF626  | HGNC | 30461 | protein_coding |
| ZNF676  | HGNC | 20429 | protein_coding |
| ZNF697  | HGNC | 32034 | protein_coding |
| ZNF708  | HGNC | 12945 | protein_coding |
| ZNF717  | HGNC | 29448 | protein_coding |
| ZNF75D  | HGNC | 13145 | protein_coding |
| ZNF785  | HGNC | 26496 | protein_coding |
| ZNF816  | HGNC | 26995 | protein_coding |
| ZNF839  | HGNC | 20345 | protein_coding |
| ZP1     | HGNC | 13187 | protein_coding |
| ZSCAN2  | HGNC | 20994 | protein_coding |
| ZSWIM4  | HGNC | 25704 | protein_coding |
| ZZEF1   | HGNC | 29027 | protein_coding |



## VEP annotated somatic variants

| CANONICAL | CCDS        | ENSP            | SWISSPROT |
|-----------|-------------|-----------------|-----------|
| YES       | CCDS3161.2  | ENSP00000348911 | Q6P093    |
| YES       | CCDS35073.1 | ENSP00000364382 | Q7RTV5    |
| YES       | CCDS5783.1  | ENSP00000377040 | Q9UDR5    |
| YES       | CCDS11684.1 | ENSP00000269081 | Q8WWZ4    |
| YES       | CCDS10466.1 | ENSP00000301732 | Q99758    |
| YES       | CCDS11683.1 | ENSP00000284425 | Q8N139    |
| YES       | CCDS11683.1 | ENSP00000284425 | Q8N139    |
| YES       | CCDS11681.1 | ENSP00000342216 | Q8IUA7    |
| YES       | CCDS42122.1 | ENSP00000382342 | P33527    |
| YES       | CCDS10568.1 | ENSP00000205557 | O95255    |
| YES       | CCDS31437.1 | ENSP00000374467 | Q09428    |
| YES       | CCDS32802.1 | ENSP00000289119 | Q8WU67    |
| YES       | CCDS10999.1 | ENSP00000303909 | Q12979    |
| YES       |             | ENSP00000471728 |           |
| YES       | CCDS8498.1  | ENSP00000281182 | Q9UKU7    |
| YES       | CCDS44165.1 | ENSP00000409612 | P11310    |
| YES       | CCDS7634.1  | ENSP00000357873 | P45954    |
| YES       | CCDS1551.1  | ENSP00000355777 | Q9H3P7    |
| YES       | CCDS12161.1 | ENSP00000301452 | Q8TDN7    |
| YES       | CCDS7928.1  | ENSP00000256997 | P11117    |
| YES       | CCDS3116.1  | ENSP00000286353 | Q8TE99    |
| YES       | CCDS10298.1 | ENSP00000258873 | Q96GR2    |
| YES       | CCDS10974.1 | ENSP00000320646 | Q4G176    |
| YES       | CCDS44825.1 | ENSP00000382349 | P0C7M7    |
| YES       | CCDS2679.1  | ENSP00000340361 | Q13705    |
| YES       | CCDS1087.1  | ENSP00000349436 | Q13444    |
| YES       | CCDS1665.1  | ENSP00000309968 | P78536    |
| YES       | CCDS7307.1  | ENSP00000362304 | Q8WXS8    |
| YES       | CCDS4444.1  | ENSP00000251582 | O95450    |
| YES       | CCDS31778.2 | ENSP00000374071 | P59510    |
| YES       | CCDS1223.1  | ENSP00000356975 | O75173    |
| YES       | CCDS3983.2  | ENSP00000370443 | Q9UKP5    |
| YES       | CCDS47954.1 | ENSP00000369921 | Q8N6G6    |
| YES       | CCDS1434.1  | ENSP00000356205 | P30542    |
| YES       | CCDS838.1   | ENSP00000358730 | P33765    |
| YES       | CCDS31286.1 | ENSP00000303042 | Q8N4X5    |
| YES       | CCDS54775.1 | ENSP00000378578 | P51825    |
| YES       | CCDS14684.1 | ENSP00000359489 | P51816    |
| YES       | CCDS43681.1 | ENSP00000380413 | Q96P47    |
| YES       | CCDS47718.1 | ENSP00000388275 | Q8NEM8    |
| YES       | CCDS3137.1  | ENSP00000443186 | P30556    |
| YES       | CCDS47483.1 | ENSP00000356774 | Q8N157    |
| YES       | CCDS10716.1 | ENSP00000307199 | Q9NZD4    |
| YES       | CCDS5198.1  | ENSP00000350509 | Q9NVV5    |
| YES       |             | ENSP00000433931 |           |
| YES       |             | ENSP00000433931 |           |
| YES       | CCDS11075.1 | ENSP00000370521 | Q9NZN9    |
| YES       | CCDS13706.1 | ENSP00000291582 | O43918    |
| YES       | CCDS13706.1 | ENSP00000291582 | O43918    |
| YES       | CCDS5622.1  | ENSP00000348573 | Q99996    |
| YES       | CCDS5622.1  | ENSP00000348573 | Q99996    |
| YES       | CCDS5832.1  | ENSP00000352584 | O60218    |
| YES       | CCDS3555.1  | ENSP00000295897 | P02768    |

VEP annotated somatic variants

|     |             |                 |        |
|-----|-------------|-----------------|--------|
| YES | CCDS12766.1 | ENSP00000293350 | Q8IZ83 |
| YES | CCDS10389.1 | ENSP00000332256 | P47895 |
| YES | CCDS7212.1  | ENSP00000363512 | P09917 |
| YES | CCDS10333.1 | ENSP00000258888 | Q96L96 |
| YES | CCDS10333.1 | ENSP00000258888 | Q96L96 |
| YES | CCDS41723.1 | ENSP00000348635 | Q86YT9 |
| YES | CCDS41723.1 | ENSP00000348635 | Q86YT9 |
| YES | CCDS2093.1  | ENSP00000339109 | Q9H1A4 |
| YES | CCDS47849.1 | ENSP00000265709 | P16157 |
| YES | CCDS33351.2 | ENSP00000427882 | Q7Z5J8 |
| YES | CCDS44734.1 | ENSP00000306678 | Q8NFD2 |
| YES | CCDS41869.1 | ENSP00000350686 | Q86XL3 |
| YES |             | ENSP00000290943 | A2A2Z9 |
| YES | CCDS41499.1 | ENSP00000365255 | Q9UPS8 |
| YES | CCDS46769.1 | ENSP00000382379 | O15084 |
| YES | CCDS919.1   | ENSP00000347802 | Q8N283 |
| YES | CCDS44920.1 | ENSP00000267116 | Q8NB46 |
| YES | CCDS34161.1 | ENSP00000342295 | Q3KP44 |
| YES | CCDS33360.1 | ENSP00000363832 | Q06278 |
| YES |             | ENSP00000469810 |        |
| YES | CCDS13855.1 | ENSP00000350199 | Q10567 |
| YES | CCDS46148.1 | ENSP00000351926 | O95782 |
| YES | CCDS32240.1 | ENSP00000261842 | Q9UPM8 |
| YES | CCDS32240.1 | ENSP00000261842 | Q9UPM8 |
| YES | CCDS31167.1 | ENSP00000365411 | Q7Z5R6 |
| YES | CCDS48138.1 | ENSP00000362268 | Q6UXV4 |
| YES |             | ENSP00000337144 | Q8IXF9 |
| YES |             | ENSP00000337144 | Q8IXF9 |
| YES | CCDS11889.1 | ENSP00000372654 | P55087 |
| YES | CCDS4124.1  | ENSP00000350541 | Q6Q4G3 |
| YES | CCDS8774.1  | ENSP00000256682 | P61204 |
| YES | CCDS34075.1 | ENSP00000336923 | A1A4S6 |
| YES |             | ENSP00000414774 |        |
| YES | CCDS14628.1 | ENSP00000276211 | Q6ZRI8 |
| YES | CCDS55540.1 | ENSP00000359045 | P98171 |
| YES | CCDS1163.1  | ENSP00000357177 | O15085 |
| YES | CCDS46.2    | ENSP00000367629 | Q5VV41 |
| YES | CCDS53376.1 | ENSP00000354837 | Q92974 |
| YES | CCDS46854.1 | ENSP00000341071 | Q9NR81 |
| YES | CCDS45068.1 | ENSP00000364893 | Q14155 |
| YES | CCDS35006.1 | ENSP00000368189 | A6NKF2 |
| YES | CCDS7131.1  | ENSP00000366487 | Q96KC2 |
| YES | CCDS54646.1 | ENSP00000420333 | Q8IUR7 |
| YES | CCDS59170.1 | ENSP00000404304 |        |
| YES | CCDS59170.1 | ENSP00000404304 |        |
| YES | CCDS59170.1 | ENSP00000404304 |        |
| YES | CCDS59170.1 | ENSP00000404304 |        |
| YES | CCDS58504.1 | ENSP00000403701 | P32121 |
| YES | CCDS12370.1 | ENSP00000222250 | Q8TBH0 |
| YES | CCDS12370.1 | ENSP00000222250 | Q8TBH0 |
| YES | CCDS14100.2 | ENSP00000216124 | P15289 |
| YES | CCDS13771.1 | ENSP00000263207 | O00192 |
| YES | CCDS47750.2 | ENSP00000391137 | Q8WXI3 |
| YES | CCDS46856.2 | ENSP00000419199 | A6NK59 |
| YES | CCDS5641.1  | ENSP00000321388 | Q9Y574 |

VEP annotated somatic variants

|     |             |                 |                      |
|-----|-------------|-----------------|----------------------|
| YES | CCDS6924.1  | ENSP00000277458 | Q9NWX5               |
| YES | CCDS2442.1  | ENSP00000326627 | Q96FT7               |
| YES | CCDS58611.1 | ENSP00000306625 | Q9BZE9               |
| YES | CCDS33249.1 | ENSP00000343674 | Q6HA08               |
| YES | CCDS33249.1 | ENSP00000343674 | Q6HA08               |
| YES | CCDS6815.1  | ENSP00000354504 | O75129               |
| YES | CCDS45847.1 | ENSP00000269197 | Q9C0F0               |
| YES | CCDS5772.1  | ENSP00000284629 | Q8WWH4               |
| YES | CCDS623.1   | ENSP00000322159 | Q96DT6               |
| YES | CCDS9700.1  | ENSP00000351155 | Q8WXF7               |
| YES | CCDS32011.1 | ENSP00000420387 | P98196               |
| YES | CCDS175.1   | ENSP00000327214 | Q9NQ11               |
| YES | CCDS1196.1  | ENSP00000354490 | P50993               |
| YES | CCDS1197.1  | ENSP00000357060 | Q13733               |
| YES | CCDS42207.1 | ENSP00000262429 | O75185               |
| YES | CCDS31142.1 | ENSP00000349142 | P36542               |
| YES | CCDS35339.1 | ENSP00000345728 | Q04656               |
| YES | CCDS11965.1 | ENSP00000445359 | O43520               |
| YES | CCDS33489.1 | ENSP00000342481 | O75110               |
| YES | CCDS33489.1 | ENSP00000342481 | O75110               |
| YES | CCDS2768.1  | ENSP00000323099 | Q8WXE1               |
| YES | CCDS10640.1 | ENSP00000378917 | Q8WWM7               |
| YES | CCDS35321.1 | ENSP00000363645 | Q58HT5               |
| YES | CCDS35320.1 | ENSP00000421172 | Q6E213               |
| YES | CCDS30948.1 | ENSP00000356590 | Q5T1B0               |
| YES | CCDS10405.1 | ENSP00000262320 | O15169               |
| YES | CCDS12364.1 | ENSP00000321874 | Q9Y2A9               |
| YES | CCDS11775.1 | ENSP00000316338 | Q9UQB8               |
| YES | CCDS10434.1 | ENSP00000324510 | O94812               |
| YES | CCDS3728.1  | ENSP00000438273 | Q6ZW61               |
| YES | CCDS12581.1 | ENSP00000269980 | P12694               |
| YES | CCDS5550.1  | ENSP00000223368 | Q9BQE9               |
| YES | CCDS14616.1 | ENSP00000437775 | Q5H9F3               |
| YES | CCDS44623.1 | ENSP00000399709 | O76090               |
| YES | CCDS8726.1  | ENSP00000281474 | Q96G01               |
| YES | CCDS7446.1  | ENSP00000224337 | Q8WV28               |
| YES | CCDS14334.1 | ENSP00000252677 | O95972               |
| YES | CCDS10324.1 | ENSP00000307041 | Q01954               |
| YES | CCDS13210.1 | ENSP00000170150 | Q8N4F0               |
| YES | CCDS11673.1 | ENSP00000307208 | Q12830               |
| YES | CCDS11456.2 | ENSP00000418960 | Q3YB49,Q3B891,K7EPC7 |
| YES | CCDS11456.2 | ENSP00000418960 | Q3YB49,Q3B891,K7EPC7 |
| YES | CCDS11456.2 | ENSP00000418960 | Q3YB49,Q3B891,K7EPC7 |
| YES | CCDS9344.1  | ENSP00000439902 | P51587               |
| YES | CCDS34127.2 | ENSP00000419765 | Q9H8M2               |
| YES | CCDS13662.1 | ENSP00000330753 | Q9NSI6               |
| YES | CCDS44103.1 | ENSP00000397759 | Q9NW68               |
| YES | CCDS12033.1 | ENSP00000333769 | P35613               |
| YES | CCDS12033.1 | ENSP00000333769 | P35613               |
| YES | CCDS31301.1 | ENSP00000260723 | Q32M84               |
| YES | CCDS31301.1 | ENSP00000260723 | Q32M84               |
| YES | CCDS737.1   | ENSP00000343686 | Q5XKL5               |
| YES | CCDS9043.1  | ENSP00000256015 | P62324               |
| YES | CCDS4460.2  | ENSP00000330200 | Q6UXG8               |
| YES | CCDS11605.1 | ENSP00000345824 | O95153               |

VEP annotated somatic variants

|     |             |                 |        |
|-----|-------------|-----------------|--------|
| YES | CCDS44430.1 | ENSP00000403151 | Q8TEF2 |
| YES | CCDS44387.1 | ENSP00000363259 | Q711Q0 |
| YES | CCDS31310.1 | ENSP00000284694 | Q96M02 |
| YES | CCDS31480.1 | ENSP00000367878 | Q9H6J7 |
| YES | CCDS9179.1  | ENSP00000261318 | Q9H741 |
| YES |             | ENSP00000431759 |        |
| YES | CCDS8667.1  | ENSP00000331691 | Q5U649 |
| YES | CCDS61401.1 | ENSP00000382794 | A8MTL3 |
| YES | CCDS45591.1 | ENSP00000370770 | Q6ZR85 |
| YES | CCDS11477.1 | ENSP00000313500 | Q8N3J3 |
| YES | CCDS12057.2 | ENSP00000465260 |        |
| YES | CCDS12511.1 | ENSP00000301246 | Q9GZP8 |
| YES | CCDS14602.1 | ENSP00000304364 | Q96EU7 |
| YES | CCDS44340.1 | ENSP00000355492 | Q5SY80 |
| YES | CCDS30745.1 | ENSP00000360046 | Q5JVX7 |
| YES | CCDS30729.1 | ENSP00000345972 | Q5VWT5 |
| YES | CCDS30755.1 | ENSP00000322609 | Q5RHP9 |
| YES | CCDS11761.1 | ENSP00000340864 | Q9BXJ1 |
| YES | CCDS42839.1 | ENSP00000373586 | Q08AI8 |
| YES |             | ENSP00000290390 |        |
| YES | CCDS32883.1 | ENSP00000245907 | P01024 |
| YES | CCDS47131.1 | ENSP00000381937 | Q0P651 |
| YES | CCDS6826.1  | ENSP00000223642 | P01031 |
| YES | CCDS6826.1  | ENSP00000223642 | P01031 |
| YES | CCDS43419.1 | ENSP00000420610 | Q7Z4U5 |
| YES | CCDS47201.1 | ENSP00000322061 | P10643 |
| YES | CCDS32684.1 | ENSP00000405388 | Q9NS85 |
| YES | CCDS10965.1 | ENSP00000309649 | P35218 |
| YES | CCDS13823.1 | ENSP00000381364 | Q9Y6J0 |
| YES | CCDS45998.1 | ENSP00000353362 | O00555 |
| YES | CCDS59522.1 | ENSP00000360423 | Q00975 |
| YES | CCDS44788.1 | ENSP00000266376 | Q13936 |
| YES | CCDS54588.1 | ENSP00000418081 | Q9NY47 |
| YES | CCDS54588.1 | ENSP00000418081 | Q9NY47 |
| YES | CCDS7125.1  | ENSP00000320025 | Q08289 |
| YES | CCDS54965.1 | ENSP00000425493 | Q8TC20 |
| YES | CCDS5835.1  | ENSP00000354826 | Q05682 |
| YES | CCDS12288.1 | ENSP00000320866 | P27797 |
| YES | CCDS7091.1  | ENSP00000368124 | Q8IU85 |
| YES | CCDS3703.1  | ENSP00000339740 | Q13557 |
| YES | CCDS1820.1  | ENSP00000367755 | Q7Z624 |
| YES | CCDS45947.1 | ENSP00000416797 | Q9P1Y5 |
| YES | CCDS47436.1 | ENSP00000381758 | Q9UMQ6 |
| YES | CCDS1586.1  | ENSP00000271971 | O14815 |
| YES | CCDS12156.1 | ENSP00000222125 | Q13938 |
| YES | CCDS13948.1 | ENSP00000384570 | Q9BWT7 |
| YES | CCDS54289.1 | ENSP00000375767 | Q9Y2G2 |
| YES | CCDS12323.1 | ENSP00000393417 | P31944 |
| YES | CCDS1198.2  | ENSP00000357057 | P31415 |
| YES | CCDS41246.1 | ENSP00000366221 | Q86V15 |
| YES | CCDS12514.2 | ENSP00000386962 | Q6ZRH7 |
| YES | CCDS2569.1  | ENSP00000341940 | P56539 |
| YES | CCDS10784.1 | ENSP00000258214 | Q96A19 |
| YES | CCDS1854.2  | ENSP00000295117 | Q96G28 |
| YES | CCDS12322.1 | ENSP00000292574 | Q8IYK2 |

VEP annotated somatic variants

|     |             |                 |        |
|-----|-------------|-----------------|--------|
| YES | CCDS11940.2 | ENSP00000381553 | Q96M91 |
| YES |             | ENSP00000416445 | Q96HB5 |
| YES | CCDS43617.1 | ENSP00000307666 | Q96JG6 |
| YES | CCDS42400.1 | ENSP00000329360 | Q6PK04 |
| YES | CCDS31282.1 | ENSP00000358718 | Q5T655 |
| YES | CCDS43242.1 | ENSP00000373566 | Q5M9N0 |
| YES | CCDS55896.1 | ENSP00000421868 |        |
| YES |             | ENSP00000359299 |        |
| YES |             | ENSP00000376154 | Q2TAC2 |
| YES | CCDS7257.1  | ENSP00000263102 | Q16204 |
| YES | CCDS53691.1 | ENSP00000415528 | Q6ZN84 |
| YES | CCDS6570.1  | ENSP00000308815 | Q99731 |
| YES | CCDS43078.1 | ENSP00000292301 | P41597 |
| YES | CCDS4982.1  | ENSP00000287097 | Q6YHK3 |
| YES | CCDS43131.1 | ENSP00000381272 | Q6Q8B3 |
| YES | CCDS53399.1 | ENSP00000357012 | Q9BZW8 |
| YES | CCDS32720.1 | ENSP00000353259 | Q9UGN4 |
| YES | CCDS12661.1 | ENSP00000310966 | O15446 |
| YES | CCDS1482.1  | ENSP00000313875 | P15529 |
| YES | CCDS11807.1 | ENSP00000312027 | P09564 |
| YES | CCDS4200.2  | ENSP00000378350 | Q9UJX2 |
| YES | CCDS31601.1 | ENSP00000345133 | Q6DT37 |
| YES | CCDS54499.1 | ENSP00000405726 | O75419 |
| YES | CCDS2727.1  | ENSP00000296129 | Q9H5V8 |
| YES | CCDS3889.1  | ENSP00000425093 | Q13634 |
| YES | CCDS5085.1  | ENSP00000357907 | Q9BWU1 |
| YES | CCDS11736.1 | ENSP00000410561 | Q00526 |
| YES | CCDS3999.1  | ENSP00000256443 | P50613 |
| YES | CCDS4546.1  | ENSP00000274695 | Q5VV42 |
| YES | CCDS14186.1 | ENSP00000369325 | O76039 |
| YES | CCDS13088.1 | ENSP00000419879 | O95674 |
| YES | CCDS34389.1 | ENSP00000365465 |        |
| YES | CCDS34389.1 | ENSP00000365465 |        |
| YES | CCDS46086.1 | ENSP00000385739 | Q3KPI0 |
| YES | CCDS12586.2 | ENSP00000349971 | P40198 |
| YES | CCDS13742.1 | ENSP00000382733 | Q9NZK5 |
| YES |             | ENSP00000262608 | Q9BXF3 |
| YES |             | ENSP00000262608 | Q9BXF3 |
| YES | CCDS33595.1 | ENSP00000337358 | Q9BXW7 |
| YES | CCDS13740.1 | ENSP00000329318 | Q9BXQ6 |
| YES | CCDS14479.1 | ENSP00000362018 | Q92674 |
| YES | CCDS34529.1 | ENSP00000357311 | Q5EE01 |
| YES | CCDS13255.1 | ENSP00000380661 | Q9BV73 |
| YES | CCDS13255.1 | ENSP00000380661 | Q9BV73 |
| YES | CCDS3086.1  | ENSP00000336524 | Q96MT8 |
| YES | CCDS3086.1  | ENSP00000336524 | Q96MT8 |
| YES | CCDS3102.1  | ENSP00000264982 | Q8NHQ1 |
| YES | CCDS45763.1 | ENSP00000450461 | Q96GE4 |
| YES | CCDS6901.2  | ENSP00000361929 | Q5T4B2 |
| YES | CCDS10825.1 | ENSP00000317842 | O00748 |
| YES | CCDS1385.1  | ENSP00000356399 | P08603 |
| YES | CCDS5773.1  | ENSP00000003084 | P13569 |
| YES | CCDS33071.1 | ENSP00000470813 | P01233 |
| YES | CCDS927.1   | ENSP00000358262 | Q86WJ1 |
| YES | CCDS53849.1 | ENSP00000392395 | Q96EP1 |

VEP annotated somatic variants

|     |             |                 |         |
|-----|-------------|-----------------|---------|
| YES | CCDS53849.1 | ENSP00000392395 | Q96EP1  |
| YES | CCDS30802.1 | ENSP00000437082 | Q15782  |
| YES | CCDS11106.1 | ENSP00000304290 | P11230  |
| YES | CCDS10059.1 | ENSP00000307297 | Q8NCHO  |
| YES | CCDS10544.1 | ENSP00000316328 | P33076  |
| YES |             | ENSP00000442057 | Q9BW66  |
| YES | CCDS55891.1 | ENSP00000376306 | O14578  |
| YES | CCDS48136.1 | ENSP00000401764 | Q99966  |
| YES | CCDS4053.1  | ENSP00000404203 | P17540  |
| YES | CCDS138.1   | ENSP00000234488 | P51797  |
| YES | CCDS167.1   | ENSP00000332771 | P51800  |
| YES | CCDS5717.1  | ENSP00000385300 | P56746  |
| YES | CCDS8594.1  | ENSP00000299663 | Q9ULY5  |
| YES | CCDS14767.1 | ENSP00000358460 | O15247  |
| YES | CCDS256.1   | ENSP00000363500 | Q9Y696  |
| YES | CCDS58285.1 | ENSP00000439093 | P30622  |
| YES | CCDS1770.1  | ENSP00000327009 | Q8N3C7  |
| YES | CCDS14198.1 | ENSP00000368824 | Q8WXI2  |
| YES | CCDS7478.2  | ENSP00000349147 | Q9NRU3  |
| YES | CCDS10799.1 | ENSP00000320949 | A5YKK6  |
| YES | CCDS2050.1  | ENSP00000289382 | Q9UKZ1  |
| YES | CCDS5015.1  | ENSP00000441046 | P21554  |
| YES | CCDS43041.1 | ENSP00000380602 | Q8I WV2 |
| YES | CCDS5889.1  | ENSP00000354778 | Q9UHC6  |
| YES | CCDS5889.1  | ENSP00000354778 | Q9UHC6  |
| YES | CCDS35118.1 | ENSP00000362962 | Q7Z7A1  |
| YES | CCDS34637.1 | ENSP00000265136 | O75128  |
| YES | CCDS10892.2 | ENSP00000315775 |         |
| YES | CCDS5742.1  | ENSP00000297135 | Q9UP83  |
| YES | CCDS7554.1  | ENSP00000340937 | Q9UMD9  |
| YES | CCDS4436.1  | ENSP00000375069 | Q86Y22  |
| YES | CCDS41353.1 | ENSP00000359603 | Q17RW2  |
| YES | CCDS41353.1 | ENSP00000359603 | Q17RW2  |
| YES |             | ENSP00000318234 |         |
| YES | CCDS14541.1 | ENSP00000361290 | Q14031  |
| YES | CCDS12222.1 | ENSP00000264828 | P25940  |
| YES | CCDS13727.1 | ENSP00000355180 | P12109  |
| YES | CCDS33412.1 | ENSP00000295550 | P12111  |
| YES | CCDS13770.1 | ENSP00000354511 | P21964  |
| YES | CCDS31080.1 | ENSP00000406327 | Q5RI15  |
| YES | CCDS3141.1  | ENSP00000264613 | P00450  |
| YES | CCDS45329.1 | ENSP00000457881 | Q9BZB8  |
| YES | CCDS4390.1  | ENSP00000265085 | Q17RY0  |
| YES | CCDS31007.1 | ENSP00000356024 | P20023  |
| YES | CCDS6852.2  | ENSP00000362734 | Q5IJ48  |
| YES | CCDS56478.1 | ENSP00000340943 | Q13324  |
| YES | CCDS1783.1  | ENSP00000280527 | Q9NZV1  |
| YES | CCDS1783.1  | ENSP00000280527 | Q9NZV1  |
| YES | CCDS55019.1 | ENSP00000389026 | P54108  |
| YES | CCDS33446.1 | ENSP00000366557 | Q9BZJ0  |
| YES | CCDS32331.1 | ENSP00000268184 | Q6UUV7  |
| YES |             | ENSP00000182096 | Q68DQ2  |
| YES |             | ENSP00000391551 |         |
| YES | CCDS14711.1 | ENSP00000359310 | Q6PB30  |
| YES | CCDS13003.1 | ENSP00000217244 | P68400  |

VEP annotated somatic variants

|     |             |                 |        |
|-----|-------------|-----------------|--------|
| YES | CCDS10284.1 | ENSP00000312506 | Q6UVK1 |
| YES | CCDS58780.1 | ENSP00000415579 | Q8NI51 |
| YES |             | ENSP00000470478 |        |
| YES | CCDS7269.1  | ENSP00000389714 | Q9UI47 |
| YES | CCDS6775.1  | ENSP00000320434 | Q9UBT7 |
| YES | CCDS7113.1  | ENSP00000367064 | O60494 |
| YES | CCDS55709.1 | ENSP00000444856 | Q13617 |
| YES | CCDS55003.1 | ENSP00000438788 | Q14999 |
| YES | CCDS56498.1 | ENSP00000353401 | P39880 |
| YES | CCDS56498.1 | ENSP00000353401 | P39880 |
| YES | CCDS46465.1 | ENSP00000387006 | Q9HCG8 |
| YES | CCDS46465.1 | ENSP00000387006 | Q9HCG8 |
| YES | CCDS8336.2  | ENSP00000282251 | Q2TBE0 |
| YES | CCDS48135.1 | ENSP00000362795 | P49682 |
| YES | CCDS53639.1 | ENSP00000398979 | Q8NBI2 |
| YES | CCDS7780.1  | ENSP00000437041 | Q6BCY4 |
| YES | CCDS12571.1 | ENSP00000332679 | Q16696 |
| YES | CCDS12571.1 | ENSP00000332679 | Q16696 |
| YES | CCDS5674.1  | ENSP00000337915 | P08684 |
| YES | CCDS42517.1 | ENSP00000448998 | Q9HCS2 |
| YES | CCDS5623.1  | ENSP00000003100 | Q16850 |
| YES | CCDS31578.1 | ENSP00000257215 | Q9Y4D2 |
| YES | CCDS2180.1  | ENSP00000264161 | P14868 |
| YES | CCDS33863.1 | ENSP00000260803 | Q9UK59 |
| YES | CCDS32926.1 | ENSP00000254337 | Q66K64 |
| YES | CCDS32926.1 | ENSP00000254337 | Q66K64 |
| YES | CCDS32926.1 | ENSP00000254337 | Q66K64 |
| YES | CCDS11952.1 | ENSP00000389140 | P43146 |
| YES | CCDS4550.1  | ENSP00000367715 | Q9UHG0 |
|     | CCDS47150.1 | ENSP00000345062 | Q6V1P9 |
| YES | CCDS34108.1 | ENSP00000349576 | P32321 |
| YES | CCDS44856.1 | ENSP00000384703 | Q96FC9 |
| YES | CCDS44856.1 | ENSP00000384703 | Q96FC9 |
| YES | CCDS30964.1 | ENSP00000330460 | Q5T1V6 |
| YES | CCDS35133.1 | ENSP00000362727 | Q8TEH3 |
| YES | CCDS31423.1 | ENSP00000328524 | Q6IQ26 |
| YES | CCDS3977.1  | ENSP00000265036 | Q8WUY9 |
| YES | CCDS33598.1 | ENSP00000263196 | P98153 |
| YES | CCDS47547.1 | ENSP00000385780 | Q9Y6T7 |
| YES | CCDS146.1   | ENSP00000365397 | O75911 |
| YES | CCDS7652.1  | ENSP00000284690 | Q7L7V1 |
| YES | CCDS9261.1  | ENSP00000311135 | Q8IY37 |
| YES | CCDS11464.1 | ENSP00000262415 | Q14562 |
| YES | CCDS11464.1 | ENSP00000262415 | Q14562 |
| YES | CCDS11464.1 | ENSP00000262415 | Q14562 |
| YES | CCDS43374.1 | ENSP00000381565 | O60610 |
| YES | CCDS31799.1 | ENSP00000301180 | Q9P265 |
| YES | CCDS45286.1 | ENSP00000321711 | Q8TF46 |
|     | CCDS31055.1 | ENSP00000355596 | Q9NRI5 |
| YES | CCDS53482.1 | ENSP00000355593 | Q9NRI5 |
| YES | CCDS6130.1  | ENSP00000220812 | Q9UBT3 |
| YES | CCDS44690.1 | ENSP00000365272 | Q15700 |
| YES | CCDS14403.1 | ENSP00000363480 | Q92796 |
| YES | CCDS7353.2  | ENSP00000361467 | Q8TDM6 |
| YES | CCDS4897.1  | ENSP00000349893 | Q6UY11 |

VEP annotated somatic variants

|     |             |                 |        |
|-----|-------------|-----------------|--------|
| YES | CCDS12463.1 | ENSP00000342012 | Q6E0U4 |
| YES |             | ENSP00000382133 |        |
| YES |             | ENSP00000330671 | Q96DT5 |
|     |             | ENSP00000295937 | Q6ZR08 |
|     |             | ENSP00000414402 | Q0VDD8 |
|     |             | ENSP00000414402 | Q0VDD8 |
|     |             | ENSP00000414402 | Q0VDD8 |
|     |             | ENSP00000414402 | Q0VDD8 |
|     |             | ENSP00000414402 | Q0VDD8 |
| YES |             | ENSP00000374490 | Q9UFH2 |
| YES |             | ENSP00000352312 | Q96JB1 |
| YES | CCDS11160.1 | ENSP00000262442 | Q9NYC9 |
| YES | CCDS420.1   | ENSP00000296218 | O14645 |
| YES | CCDS44167.1 | ENSP00000359699 | Q8WZ79 |
| YES | CCDS7485.1  | ENSP00000315659 | Q6XZF7 |
| YES | CCDS4371.1  | ENSP00000256935 | Q92608 |
| YES | CCDS46835.1 | ENSP00000266037 | Q8IZD9 |
| YES | CCDS42460.1 | ENSP00000381657 | Q8TEK3 |
| YES | CCDS10982.1 | ENSP00000376807 | P16444 |
| YES | CCDS46064.1 | ENSP00000347716 | Q92782 |
| YES | CCDS41358.1 | ENSP00000359127 | Q9H2P9 |
| YES | CCDS31851.1 | ENSP00000315988 | Q6NUT2 |
| YES | CCDS135.1   | ENSP00000294485 | Q8NBI3 |
| YES | CCDS14480.2 | ENSP00000378635 | Q13474 |
| YES | CCDS14480.2 | ENSP00000378635 | Q13474 |
| YES | CCDS14480.2 | ENSP00000378635 | Q13474 |
| YES | CCDS8384.1  | ENSP00000315465 | Q8TD84 |
| YES | CCDS11898.1 | ENSP00000257189 | P32926 |
| YES | CCDS45845.1 | ENSP00000352785 | Q86SJ6 |
| YES | CCDS45845.1 | ENSP00000352785 | Q86SJ6 |
| YES | CCDS4501.1  | ENSP00000369129 | P15924 |
| YES | CCDS47443.1 | ENSP00000244364 | Q03001 |
| YES | CCDS9643.1  | ENSP00000312224 | Q96FN9 |
| YES | CCDS4534.1  | ENSP00000341680 | Q96EV8 |
| YES | CCDS34216.1 | ENSP00000425048 | Q8NBA8 |
| YES | CCDS5587.1  | ENSP00000322885 | Q86UW9 |
| YES | CCDS13883.1 | ENSP00000333917 | Q8NEJ0 |
| YES | CCDS9033.1  | ENSP00000279488 | Q16828 |
| YES | CCDS5644.1  | ENSP00000320130 | O14576 |
| YES | CCDS44717.1 | ENSP00000381167 | Q8NCM8 |
| YES | CCDS53308.1 | ENSP00000407323 |        |
| YES | CCDS14300.1 | ENSP00000417052 | Q15125 |
| YES | CCDS215.1   | ENSP00000364028 | P42892 |
| YES | CCDS2493.1  | ENSP00000302051 | O95672 |
| YES | CCDS58860.1 | ENSP00000376457 | Q9H8V3 |
| YES | CCDS43508.1 | ENSP00000387388 | Q008S8 |
| YES | CCDS1363.2  | ENSP00000318147 | Q9BZQ6 |
| YES | CCDS4522.1  | ENSP00000368683 | P05305 |
| YES | CCDS55902.1 | ENSP00000366416 | P24530 |
| YES | CCDS31874.1 | ENSP00000317955 | Q15075 |
| YES | CCDS13522.1 | ENSP00000217182 | Q05639 |
| YES | CCDS4507.1  | ENSP00000369038 | O43324 |
| YES | CCDS11512.1 | ENSP00000332111 | Q8IY85 |
| YES | CCDS45751.1 | ENSP00000403932 | Q8N7B9 |
| YES | CCDS44803.1 | ENSP00000409382 | Q9BSW2 |



VEP annotated somatic variants

|     |             |                 |        |
|-----|-------------|-----------------|--------|
| YES | CCDS33715.2 | ENSP00000295824 | Q8N7U6 |
| YES | CCDS42071.1 | ENSP00000268206 | Q7Z2Z2 |
| YES | CCDS11489.1 | ENSP00000392094 | Q15029 |
| YES | CCDS14210.1 | ENSP00000253039 | P41091 |
| YES | CCDS14617.1 | ENSP00000311280 | Q99607 |
| YES | CCDS33642.1 | ENSP00000385277 | Q5R3F8 |
| YES | CCDS33642.1 | ENSP00000385277 | Q5R3F8 |
| YES | CCDS33642.1 | ENSP00000385277 | Q5R3F8 |
| YES | CCDS5562.2  | ENSP00000252034 | P15502 |
| YES | CCDS4518.1  | ENSP00000346693 | Q9NXB9 |
| YES | CCDS190.1   | ENSP00000420608 | Q8N766 |
| YES | CCDS6309.1  | ENSP00000220853 | Q15006 |
| YES | CCDS6309.1  | ENSP00000220853 | Q15006 |
| YES | CCDS32154.1 | ENSP00000334314 | O00423 |
| YES | CCDS32154.1 | ENSP00000334314 | O00423 |
| YES | CCDS32154.1 | ENSP00000334314 | O00423 |
| YES | CCDS2123.1  | ENSP00000295206 | Q05925 |
| YES | CCDS48029.1 | ENSP00000362299 | P17813 |
| YES | CCDS9389.1  | ENSP00000261488 | Q8TC92 |
| YES | CCDS53556.1 | ENSP00000360250 | P49961 |
| YES | CCDS9825.1  | ENSP00000335246 | O75356 |
| YES | CCDS31929.2 | ENSP00000374212 | Q96L91 |
| YES | CCDS5873.2  | ENSP00000376684 | O15197 |
| YES | CCDS1547.1  | ENSP00000355802 | P07099 |
| YES | CCDS6060.1  | ENSP00000430269 | P34913 |
| YES | CCDS45762.1 | ENSP00000401445 | O75460 |
| YES | CCDS8852.1  | ENSP00000257934 | Q14674 |
| YES | CCDS3101.2  | ENSP00000374218 | A0FGR9 |
| YES | CCDS32299.1 | ENSP00000452762 | P13804 |
| YES | CCDS33085.1 | ENSP00000346173 | P38117 |
| YES | CCDS12622.1 | ENSP00000292147 | O95571 |
| YES | CCDS30774.1 | ENSP00000359356 | O60447 |
| YES | CCDS54209.1 | ENSP00000445905 | Q96CN4 |
| YES | CCDS54209.1 | ENSP00000445905 | Q96CN4 |
| YES | CCDS11737.1 | ENSP00000301607 | Q92817 |
| YES | CCDS11737.1 | ENSP00000301607 | Q92817 |
| YES | CCDS53902.1 | ENSP00000387331 | Q9NVH0 |
| YES | CCDS1620.1  | ENSP00000355506 | Q9UQ84 |
| YES | CCDS3502.1  | ENSP00000370695 | Q9NV70 |
| YES | CCDS5258.1  | ENSP00000356042 | P15311 |
| YES | CCDS35457.1 | ENSP00000353393 | P00451 |
| YES | CCDS35457.1 | ENSP00000353393 | P00451 |
| YES | CCDS14666.1 | ENSP00000218099 | P00740 |
| YES | CCDS14375.1 | ENSP00000364035 | Q6GMR7 |
| YES | CCDS8012.1  | ENSP00000278840 | O95864 |
| YES | CCDS8013.1  | ENSP00000278829 | Q9Y5Q0 |
| YES | CCDS10314.1 | ENSP00000385080 | P16930 |
| YES | CCDS14065.1 | ENSP00000216214 | Q9NWS6 |
| YES | CCDS55501.1 | ENSP00000359820 | Q6P4D5 |
| YES | CCDS55501.1 | ENSP00000359820 | Q6P4D5 |
| YES | CCDS43996.1 | ENSP00000375268 | Q17RB0 |
| YES | CCDS43996.1 | ENSP00000375268 | Q17RB0 |
| YES | CCDS6375.2  | ENSP00000378710 | Q49AJ0 |
| YES | CCDS43497.1 | ENSP00000357545 | Q5T6X4 |
| YES | CCDS41689.1 | ENSP00000348852 | Q92567 |

VEP annotated somatic variants

|     |             |                 |        |
|-----|-------------|-----------------|--------|
| YES | CCDS31648.1 | ENSP00000365295 | A6NEQ2 |
| YES | CCDS47033.1 | ENSP00000265018 | Q9ULE4 |
| YES | CCDS44878.1 | ENSP00000329995 | A6NE01 |
| YES | CCDS12448.1 | ENSP00000323355 | Q17R55 |
| YES | CCDS1103.1  | ENSP00000354958 | P81408 |
| YES | CCDS44374.2 | ENSP00000363482 | Q9Y4E1 |
| YES | CCDS53361.1 | ENSP00000354669 | Q8N5J2 |
| YES | CCDS47383.1 | ENSP00000259698 | Q9Y4F9 |
| YES | CCDS43341.1 | ENSP00000283357 | Q96LP2 |
| YES | CCDS32515.1 | ENSP00000373952 | O15360 |
| YES | CCDS4805.1  | ENSP00000229769 | Q9HB96 |
| YES | CCDS4805.1  | ENSP00000229769 | Q9HB96 |
| YES | CCDS4805.1  | ENSP00000229769 | Q9HB96 |
| YES | CCDS8717.1  | ENSP00000443291 | Q96K12 |
| YES | CCDS33424.1 | ENSP00000264042 | O94887 |
| YES | CCDS33424.1 | ENSP00000264042 | O94887 |
| YES | CCDS11801.1 | ENSP00000304592 | P49327 |
| YES | CCDS11801.1 | ENSP00000304592 | P49327 |
| YES | CCDS11801.1 | ENSP00000304592 | P49327 |
| YES | CCDS11801.1 | ENSP00000304592 | P49327 |
| YES | CCDS46761.1 | ENSP00000384169 | P98095 |
| YES | CCDS12196.1 | ENSP00000470498 | Q75N90 |
| YES | CCDS45010.1 | ENSP00000396160 | Q9HCM7 |
| YES |             |                 |        |
| YES | CCDS47966.1 | ENSP00000403802 | Q9UK96 |
| YES | CCDS47966.1 | ENSP00000403802 | Q9UK96 |
| YES | CCDS12526.1 | ENSP00000292852 | Q96EF6 |
| YES | CCDS2764.1  | ENSP00000296438 | Q6X9E4 |
| YES | CCDS31271.1 | ENSP00000359149 | P57775 |
| YES | CCDS53468.1 | ENSP00000316491 |        |
| YES | CCDS59365.1 | ENSP00000473001 | O14526 |
| YES | CCDS4410.1  | ENSP00000292408 | P22455 |
| YES | CCDS3788.1  | ENSP00000336829 | P02679 |
| YES | CCDS32816.1 | ENSP00000257209 | Q2V2M9 |
| YES | CCDS32816.1 | ENSP00000257209 | Q2V2M9 |
| YES | CCDS32816.1 | ENSP00000257209 | Q2V2M9 |
| YES | CCDS2221.2  | ENSP00000333836 | Q5HY92 |
| YES | CCDS3491.1  | ENSP00000336752 | Q6UN15 |
| YES | CCDS43595.1 | ENSP00000252037 | O75344 |
| YES | CCDS2280.1  | ENSP00000413152 | Q9Y680 |
| YES | CCDS48194.1 | ENSP00000358866 | P21333 |
| YES | CCDS54599.1 | ENSP00000420213 | O75369 |
| YES | CCDS4457.1  | ENSP00000261937 | P35916 |
| YES | CCDS31069.2 | ENSP00000318884 | Q9NZ56 |
| YES | CCDS31069.2 | ENSP00000318884 | Q9NZ56 |
| YES | CCDS1292.1  | ENSP00000356729 | P31513 |
| YES | CCDS41644.1 | ENSP00000263773 | Q8N3X1 |
| YES | CCDS41644.1 | ENSP00000263773 | Q8N3X1 |
| YES | CCDS47512.1 | ENSP00000297267 | Q4ZHG4 |
| YES | CCDS47512.1 | ENSP00000297267 | Q4ZHG4 |
| YES | CCDS4472.1  | ENSP00000259806 | Q12947 |
| YES | CCDS34447.1 | ENSP00000362151 | Q8IVH2 |
| YES | CCDS35148.1 | ENSP00000362344 | Q05932 |
| YES | CCDS54771.1 | ENSP00000264895 | Q86XX4 |
| YES | CCDS54771.1 | ENSP00000264895 | Q86XX4 |

VEP annotated somatic variants

|     |             |                 |        |
|-----|-------------|-----------------|--------|
| YES | CCDS54771.1 | ENSP00000264895 | Q86XX4 |
| YES | CCDS54771.1 | ENSP00000264895 | Q86XX4 |
| YES | CCDS54771.1 | ENSP00000264895 | Q86XX4 |
| YES | CCDS54808.1 | ENSP00000332886 | P0C091 |
| YES | CCDS7101.1  | ENSP00000350032 | Q9P2Q2 |
| YES | CCDS10050.1 | ENSP00000280236 | Q8NA03 |
| YES | CCDS3802.1  | ENSP00000305334 | Q8N475 |
| YES | CCDS43893.1 | ENSP00000318177 | Q96I24 |
| YES | CCDS12733.1 | ENSP00000312021 | P19526 |
| YES | CCDS12152.1 | ENSP00000313398 | P51993 |
| YES | CCDS8386.1  | ENSP00000292079 | P54710 |
| YES | CCDS2734.1  | ENSP00000296137 | Q9BQS8 |
| YES | CCDS2649.2  | ENSP00000282538 | Q6ZQY3 |
| YES | CCDS3340.1  | ENSP00000314499 | O14976 |
| YES | CCDS3340.1  | ENSP00000314499 | O14976 |
| YES | CCDS9878.2  | ENSP00000261304 | P54803 |
| YES | CCDS9878.2  | ENSP00000261304 | P54803 |
| YES | CCDS11728.1 | ENSP00000465930 | P51570 |
| YES | CCDS4325.1  | ENSP00000297107 | Q86SR1 |
| YES | CCDS58706.1 | ENSP00000314500 | Q96FL9 |
| YES | CCDS8533.1  | ENSP00000252318 | Q9NY28 |
| YES | CCDS8533.1  | ENSP00000252318 | Q9NY28 |
| YES | CCDS56057.1 | ENSP00000269209 | Q9H706 |
| YES | CCDS56057.1 | ENSP00000269209 | Q9H706 |
| YES | CCDS56057.1 | ENSP00000269209 | Q9H706 |
| YES | CCDS6869.2  | ENSP00000362485 | Q5VWV2 |
| YES | CCDS722.1   | ENSP00000340396 | Q96PP8 |
| YES | CCDS722.1   | ENSP00000340396 | Q96PP8 |
| YES | CCDS722.1   | ENSP00000340396 | Q96PP8 |
| YES | CCDS54177.1 | ENSP00000383558 | P47871 |
| YES | CCDS34338.1 | ENSP00000368917 | Q8N0V5 |
| YES | CCDS56576.1 | ENSP00000238018 | Q9Y2T3 |
| YES | CCDS13328.1 | ENSP00000341782 | Q96MZ0 |
| YES | CCDS7219.1  | ENSP00000249598 | Q9UK05 |
| YES | CCDS9669.1  | ENSP00000308533 | O14893 |
| YES | CCDS33885.1 | ENSP00000419038 | Q96RP9 |
| YES | CCDS1978.1  | ENSP00000233838 | P38435 |
| YES | CCDS12516.1 | ENSP00000334940 | Q86UU5 |
| YES | CCDS12516.1 | ENSP00000334940 | Q86UU5 |
| YES | CCDS11422.1 | ENSP00000301671 | Q8N2G8 |
| YES | CCDS5216.1  | ENSP00000356389 | Q9NU53 |
| YES | CCDS33451.1 | ENSP00000262460 | Q14691 |
| YES | CCDS32485.1 | ENSP00000205061 | Q92896 |
| YES | CCDS32485.1 | ENSP00000205061 | Q92896 |
| YES | CCDS10511.1 | ENSP00000262366 | Q9BZE0 |
| YES | CCDS4837.1  | ENSP00000362463 | Q04760 |
| YES | CCDS43980.2 | ENSP00000361700 | Q5JXX5 |
| YES | CCDS43980.2 | ENSP00000361700 | Q5JXX5 |
| YES | CCDS9096.1  | ENSP00000354053 | Q9H1C3 |
| YES | CCDS41649.1 | ENSP00000287275 | Q8WU03 |
| YES | CCDS1895.1  | ENSP00000282570 | Q96IK5 |
| YES | CCDS13804.1 | ENSP00000248996 | P19086 |
| YES | CCDS13768.1 | ENSP00000331313 | Q9BYB4 |
| YES | CCDS3517.1  | ENSP00000226413 | P30968 |
| YES | CCDS9281.1  | ENSP00000204726 | Q08378 |

VEP annotated somatic variants

|     |             |                 |        |
|-----|-------------|-----------------|--------|
| YES | CCDS54068.1 | ENSP00000329380 | P07359 |
| YES | CCDS9469.1  | ENSP00000366246 | Q9Y625 |
| YES | CCDS4553.1  | ENSP00000230036 | P80108 |
| YES | CCDS35206.1 | ENSP00000316861 | Q13491 |
| YES | CCDS1760.2  | ENSP00000264718 |        |
| YES | CCDS14662.1 | ENSP00000298110 | Q96P66 |
|     |             | ENSP00000475778 | Q86SQ6 |
| YES | CCDS41580.1 | ENSP00000376384 | Q86SQ6 |
| YES | CCDS41580.1 | ENSP00000376384 | Q86SQ6 |
| YES | CCDS41580.1 | ENSP00000376384 | Q86SQ6 |
| YES | CCDS10051.1 | ENSP00000453076 | Q14439 |
| YES | CCDS53720.1 | ENSP00000436500 | Q3KR37 |
| YES | CCDS33826.1 | ENSP00000350881 | Q8IYS0 |
| YES | CCDS33672.1 | ENSP00000385689 | Q6IC98 |
| YES | CCDS33672.1 | ENSP00000385689 | Q6IC98 |
| YES | CCDS33672.1 | ENSP00000385689 | Q6IC98 |
| YES | CCDS42655.1 | ENSP00000370896 | Q4ZG55 |
| YES | CCDS58987.1 | ENSP00000428994 | P42261 |
| YES | CCDS3797.1  | ENSP00000296526 | P42262 |
| YES | CCDS14604.1 | ENSP00000264357 | P42263 |
| YES | CCDS43042.1 | ENSP00000350348 | Q14831 |
| YES | CCDS10952.1 | ENSP00000253458 | Q14687 |
| YES | CCDS6828.1  | ENSP00000362924 | P06396 |
| YES | CCDS14336.1 | ENSP00000341247 | Q8IYD1 |
| YES | CCDS41679.1 | ENSP00000381607 | P09211 |
| YES | CCDS9858.1  | ENSP00000216465 | O43708 |
| YES | CCDS31132.1 | ENSP00000354040 | Q9BZE4 |
| YES | CCDS31132.1 | ENSP00000354040 | Q9BZE4 |
| YES | CCDS14545.1 | ENSP00000218006 | P51841 |
| YES | CCDS46870.1 | ENSP00000374268 | A0PJZ3 |
| YES | CCDS9058.1  | ENSP00000261208 | P42357 |
| YES | CCDS12454.1 | ENSP00000471894 | P81172 |
| YES | CCDS8756.2  | ENSP00000080059 | Q8WUI4 |
| YES | CCDS8756.2  | ENSP00000080059 | Q8WUI4 |
| YES | CCDS47553.1 | ENSP00000408617 | Q9UKV0 |
| YES | CCDS43503.1 | ENSP00000381220 | Q7Z4H3 |
| YES | CCDS48076.1 | ENSP00000396452 | Q08623 |
| YES | CCDS31066.1 | ENSP00000355541 | Q9H583 |
| YES | CCDS31066.1 | ENSP00000355541 | Q9H583 |
| YES | CCDS31066.1 | ENSP00000355541 | Q9H583 |
| YES | CCDS34580.1 | ENSP00000297440 | Q86Y56 |
| YES | CCDS41939.1 | ENSP00000382269 | Q9ULT8 |
| YES | CCDS41939.1 | ENSP00000382269 | Q9ULT8 |
| YES | CCDS7434.1  | ENSP00000239027 | Q9NRZ9 |
| YES | CCDS7434.1  | ENSP00000239027 | Q9NRZ9 |
| YES | CCDS2830.1  | ENSP00000232854 | Q9Y5R4 |
| YES | CCDS45277.1 | ENSP00000390158 | Q15751 |
| YES | CCDS4578.1  | ENSP00000417404 | Q30201 |
| YES | CCDS5597.1  | ENSP00000222390 | P14210 |
| YES | CCDS2704.1  | ENSP00000405423 | Q9HCP6 |
| YES | CCDS45162.1 | ENSP00000330601 | Q96JK4 |
| YES | CCDS11488.1 | ENSP00000253410 | Q9P298 |
| YES | CCDS4147.1  | ENSP00000304229 | P49773 |
| YES | CCDS4592.1  | ENSP00000353074 | P62807 |
| YES | CCDS4590.1  | ENSP00000367062 | P68431 |

VEP annotated somatic variants

|     |             |                 |        |      |
|-----|-------------|-----------------|--------|------|
| YES | CCDS4572.1  | ENSP00000366581 | P62805 |      |
| YES | CCDS7288.1  | ENSP00000346643 | Q2TB90 |      |
| YES | CCDS4765.1  | ENSP00000408146 | P04440 |      |
| YES | CCDS13647.1 | ENSP00000382071 | P50747 |      |
| YES | CCDS33875.1 | ENSP00000308944 | Q14527 |      |
| YES | CCDS8409.1  | ENSP00000278715 | P08397 |      |
| YES | CCDS33641.1 | ENSP00000216106 | Q9UGU5 |      |
| YES | CCDS33641.1 | ENSP00000216106 | Q9UGU5 |      |
| YES | CCDS9209.1  | ENSP00000257555 |        | E0YM |
| YES | CCDS12576.1 | ENSP00000375863 | Q9BUJ2 |      |
| YES | CCDS42508.1 | ENSP00000380785 | Q96ED9 |      |
| YES | CCDS32993.1 | ENSP00000262626 | P05981 |      |
| YES | CCDS7527.1  | ENSP00000299238 | Q86YV9 |      |
| YES | CCDS12475.1 | ENSP00000468057 | O14558 |      |
| YES | CCDS5936.1  | ENSP00000287907 | P47898 |      |
| YES | CCDS35301.1 | ENSP00000340648 | Q7Z6Z7 |      |
| YES | CCDS35301.1 | ENSP00000340648 | Q7Z6Z7 |      |
| YES | CCDS42952.1 | ENSP00000384432 | O75144 |      |
| YES | CCDS42952.1 | ENSP00000384432 | O75144 |      |
| YES | CCDS42952.1 | ENSP00000384432 | O75144 |      |
| YES | CCDS10359.1 | ENSP00000331897 | P48735 |      |
| YES | CCDS10297.1 | ENSP00000299518 | P50213 |      |
| YES | CCDS1180.3  | ENSP00000357113 | Q16666 |      |
| YES | CCDS13621.1 | ENSP00000343957 | P48551 |      |
| YES | CCDS10378.1 | ENSP00000268035 | P08069 |      |
| YES | CCDS5273.1  | ENSP00000349437 | P11717 |      |
| YES | CCDS5273.1  | ENSP00000349437 | P11717 |      |
| YES | CCDS5273.1  | ENSP00000349437 | P11717 |      |
| YES | CCDS46158.1 | ENSP00000270642 | A6NGN9 |      |
| YES | CCDS55491.1 | ENSP00000359940 | Q8N6C5 |      |
| YES | CCDS55491.1 | ENSP00000359940 | Q8N6C5 |      |
| YES | CCDS55491.1 | ENSP00000359940 | Q8N6C5 |      |
| YES | CCDS46891.1 | ENSP00000377370 | Q5DX21 |      |
| YES | CCDS46891.1 | ENSP00000377370 | Q5DX21 |      |
| YES | CCDS46891.1 | ENSP00000377370 | Q5DX21 |      |
| YES | CCDS41625.2 | ENSP00000421191 | Q8N9C0 |      |
| YES | CCDS61010.1 | ENSP00000436552 |        |      |
| YES | CCDS6773.1  | ENSP00000363779 | O95163 |      |
| YES | CCDS2590.1  | ENSP00000295981 | Q8NAC3 |      |
| YES | CCDS5181.1  | ENSP00000314976 | Q9UHF4 |      |
| YES | CCDS247.1   | ENSP00000270800 | Q8N6P7 |      |
| YES | CCDS7076.1  | ENSP00000369293 | P01589 |      |
| YES | CCDS10665.1 | ENSP00000457016 | Q8NBZ0 |      |
| YES | CCDS7729.1  | ENSP00000380432 | P01308 |      |
| YES | CCDS41598.1 | ENSP00000380440 | F8WCM5 |      |
| YES | CCDS12176.1 | ENSP00000303830 | P06213 |      |
| YES | CCDS12176.1 | ENSP00000303830 | P06213 |      |
| YES | CCDS47526.1 | ENSP00000385722 | Q8N201 |      |
| YES | CCDS47526.1 | ENSP00000385722 | Q8N201 |      |
| YES | CCDS9428.1  | ENSP00000310260 | Q9UL03 |      |
| YES | CCDS34188.1 | ENSP00000274364 | Q13576 |      |
| YES | CCDS1144.1  | ENSP00000354451 | Q86VI3 |      |
| YES | CCDS53728.1 | ENSP00000437554 | Q9UPP2 |      |
| YES | CCDS43645.1 | ENSP00000349770 | Q13568 |      |
| YES | CCDS12629.1 | ENSP00000244314 | Q6NXR0 |      |

## VEP annotated somatic variants

|     |             |                 |        |
|-----|-------------|-----------------|--------|
| YES | CCDS918.1   | ENSP00000358310 | Q75578 |
| YES | CCDS918.1   | ENSP00000358310 | O75578 |
| YES | CCDS42788.1 | ENSP00000380227 | P13612 |
| YES | CCDS2669.1  | ENSP00000264741 | Q13797 |
| YES | CCDS2865.1  | ENSP00000266041 | Q14624 |
| YES | CCDS2865.1  | ENSP00000266041 | Q14624 |
| YES | CCDS2865.1  | ENSP00000266041 | Q14624 |
| YES | CCDS14444.1 | ENSP00000362395 | O43736 |
| YES | CCDS1555.1  | ENSP00000411152 | P27987 |
| YES | CCDS41764.1 | ENSP00000370744 | Q14571 |
| YES | CCDS41764.1 | ENSP00000370744 | Q14571 |
| YES | CCDS4783.1  | ENSP00000363435 | Q14573 |
| YES | CCDS7557.1  | ENSP00000278071 | Q8IWB1 |
| YES | CCDS33545.1 | ENSP00000370719 | Q15811 |
| YES | CCDS33545.1 | ENSP00000370719 | Q15811 |
| YES | CCDS34062.1 | ENSP00000226319 | Q6IE81 |
| YES | CCDS14271.1 | ENSP00000218343 | Q92613 |
| YES | CCDS44494.1 | ENSP00000298622 | Q5VZ66 |
| YES | CCDS4533.1  | ENSP00000341280 | Q92833 |
| YES | CCDS4533.1  | ENSP00000341280 | Q92833 |
| YES | CCDS4533.1  | ENSP00000341280 | Q92833 |
| YES | CCDS8308.1  | ENSP00000389989 | Q9Y4A0 |
| YES | CCDS34976.1 | ENSP00000371740 | Q14678 |
| YES | CCDS620.1   | ENSP00000360195 | Q5T7N3 |
| YES | CCDS620.1   | ENSP00000360195 | Q5T7N3 |
| YES | CCDS620.1   | ENSP00000360195 | Q5T7N3 |
| YES | CCDS5217.1  | ENSP00000356381 | O75449 |
| YES | CCDS12755.1 | ENSP00000221444 | Q96RP8 |
| YES | CCDS3174.1  | ENSP00000419952 | Q14722 |
| YES | CCDS55220.1 | ENSP00000382770 | A8MYU2 |
| YES |             |                 |        |
| YES | CCDS9128.1  | ENSP00000228495 | Q9H3F6 |
| YES | CCDS9396.1  | ENSP00000385144 | Q8WVF5 |
| YES | CCDS34242.1 | ENSP00000326563 | Q7LBC6 |
| YES | CCDS491.1   | ENSP00000361473 | O75164 |
| YES | CCDS12138.1 | ENSP00000159111 | O94953 |
| YES | CCDS14794.1 | ENSP00000322408 | Q9BY66 |
| YES | CCDS14265.1 | ENSP00000367203 | O15550 |
| YES | CCDS43658.1 | ENSP00000380692 | Q6ZMT4 |
| YES | CCDS43658.1 | ENSP00000380692 | Q6ZMT4 |
| YES | CCDS43658.1 | ENSP00000380692 | Q6ZMT4 |
| YES | CCDS33666.1 | ENSP00000251993 | Q6ICG6 |
| YES | CCDS43267.1 | ENSP00000264501 | Q2LD37 |
| YES | CCDS5189.2  | ENSP00000251691 | Q5TH69 |
| YES | CCDS34923.1 | ENSP00000297591 | Q69YN4 |
| YES | CCDS46017.1 | ENSP00000376213 | Q9H0B3 |
| YES | CCDS5090.1  | ENSP00000357840 | Q5TF39 |
| YES | CCDS30963.1 | ENSP00000356319 | Q15058 |
| YES | CCDS213.1   | ENSP00000247986 | Q9P2E2 |
| YES | CCDS32718.2 | ENSP00000374566 | Q2TAC6 |
| YES | CCDS58757.1 | ENSP00000438388 | Q12756 |
| YES | CCDS11065.1 | ENSP00000320821 | O43896 |
| YES | CCDS7407.1  | ENSP00000260753 | Q96Q89 |
| YES | CCDS1288.1  | ENSP00000354560 | Q92845 |
| YES | CCDS7080.1  | ENSP00000368881 | O60870 |

VEP annotated somatic variants

|     |             |                 |        |
|-----|-------------|-----------------|--------|
| YES | CCDS6294.1  | ENSP00000285407 | Q13118 |
| YES | CCDS54815.1 | ENSP00000424198 | O95198 |
| YES | CCDS3617.1  | ENSP00000273963 | Q9P2G9 |
| YES | CCDS8599.1  | ENSP00000349477 | Q96E93 |
| YES | CCDS5931.1  | ENSP00000262189 | Q8NEZ4 |
| YES | CCDS7674.1  | ENSP00000304437 | Q76NI1 |
| YES | CCDS45002.1 | ENSP00000328236 | P50748 |
| YES | CCDS47651.1 | ENSP00000330878 | A9QM74 |
| YES | CCDS11513.1 | ENSP00000290158 | Q14974 |
| YES | CCDS13849.1 | ENSP00000331242 | Q96MU8 |
| YES | CCDS11377.1 | ENSP00000269576 | P13645 |
| YES | CCDS11393.1 | ENSP00000225899 | Q14532 |
| YES | CCDS11395.1 | ENSP00000329165 | O76013 |
| YES | CCDS42961.1 | ENSP00000381009 | P60411 |
| YES | CCDS42964.1 | ENSP00000381005 | P60328 |
| YES | CCDS42963.1 | ENSP00000375476 | P60329 |
| YES | CCDS14011.1 | ENSP00000216237 | Q969R5 |
| YES | CCDS5138.1  | ENSP00000400365 | P24043 |
| YES | CCDS5138.1  | ENSP00000400365 | P24043 |
| YES | CCDS43491.1 | ENSP00000230538 | Q16363 |
| YES | CCDS43491.1 | ENSP00000230538 | Q16363 |
| YES | CCDS1351.1  | ENSP00000258341 | P11047 |
| YES | CCDS1351.1  | ENSP00000258341 | P11047 |
| YES | CCDS1351.1  | ENSP00000258341 | P11047 |
| YES | CCDS1352.1  | ENSP00000264144 | Q13753 |
| YES | CCDS34551.1 | ENSP00000437550 | O95835 |
| YES | CCDS1015.1  | ENSP00000334644 | Q5T5A8 |
| YES | CCDS35183.1 | ENSP00000360753 | Q6JVE9 |
| YES | CCDS30624.1 | ENSP00000340988 | Q5SZI1 |
| YES | CCDS8972.1  | ENSP00000308369 | Q9Y2U8 |
| YES | CCDS34587.1 | ENSP00000222725 | Q8NES3 |
| YES | CCDS12890.1 | ENSP00000291759 | P59901 |
| YES | CCDS5563.1  | ENSP00000336740 | P53667 |
| YES | CCDS45905.1 | ENSP00000467753 | P0C6S8 |
| YES | CCDS8780.2  | ENSP00000267102 | Q6UX01 |
| YES | CCDS53876.1 | ENSP00000433352 |        |
| YES | CCDS4087.1  | ENSP00000231368 | Q9UIQ6 |
| YES | CCDS5987.2  | ENSP00000381298 | Q17RB8 |
| YES | CCDS35374.1 | ENSP00000360690 | Q496Y0 |
| YES | CCDS35374.1 | ENSP00000360690 | Q496Y0 |
| YES | CCDS10253.1 | ENSP00000261921 | Q08397 |
| YES | CCDS3291.1  | ENSP00000318089 | Q93052 |
| YES | CCDS8701.1  | ENSP00000346442 | Q12912 |
| YES | CCDS2182.1  | ENSP00000374135 | Q9NZR2 |
| YES | CCDS8181.1  | ENSP00000294304 | O75197 |
| YES | CCDS33626.1 | ENSP00000384291 | A4QPB2 |
| YES | CCDS33626.1 | ENSP00000384291 | A4QPB2 |
| YES | CCDS3371.1  | ENSP00000421922 | P30533 |
| YES | CCDS9686.1  | ENSP00000298288 | Q96L50 |
| YES | CCDS31197.1 | ENSP00000363275 | Q8N456 |
| YES | CCDS43750.1 | ENSP00000353538 | Q9C099 |
| YES | CCDS41816.1 | ENSP00000376910 | Q96JM4 |
| YES | CCDS33922.1 | ENSP00000265245 | Q9H089 |
| YES | CCDS12435.1 | ENSP00000446271 | Q8ND56 |
| YES | CCDS3767.1  | ENSP00000422392 | P62312 |

VEP annotated somatic variants

|     |             |                 |          |
|-----|-------------|-----------------|----------|
| YES | CCDS13733.1 | ENSP00000380837 | P48449   |
| YES | CCDS33527.2 | ENSP00000373846 | O94822   |
| YES | CCDS31446.1 | ENSP00000336817 | Q86TE4   |
| YES | CCDS12587.1 | ENSP00000328737 | Q6UWN0   |
| YES | CCDS986.1   | ENSP00000357904 | Q96S90   |
| YES | CCDS7507.1  | ENSP00000359240 | Q9BRK4   |
| YES | CCDS7507.1  | ENSP00000359240 | Q9BRK4   |
| YES | CCDS43539.1 | ENSP00000385334 | Q9Y6D9   |
| YES | CCDS3715.1  | ENSP00000296509 | Q13257   |
| YES | CCDS14720.1 | ENSP00000349085 | P43355   |
| YES | CCDS14710.1 | ENSP00000377478 | P43365   |
| YES | CCDS14221.1 | ENSP00000368266 | O15481   |
| YES | CCDS35417.1 | ENSP00000285879 | O60732   |
| YES | CCDS14678.1 | ENSP00000354660 | Q9UBF1   |
| YES | CCDS14362.1 | ENSP00000364209 | Q9UNF1   |
| YES | CCDS7010.1  | ENSP00000319388 | Q6UXC1   |
| YES | CCDS55526.1 | ENSP00000414517 | Q13495   |
| YES | CCDS5122.1  | ENSP00000357453 | P33908   |
| YES | CCDS34209.1 | ENSP00000261483 | Q16706   |
| YES | CCDS33951.1 | ENSP00000285599 | Q9Y2E5   |
| YES | CCDS32954.1 | ENSP00000325313 | Q66K74   |
| YES |             | ENSP00000345629 | Q6ZN16   |
| YES | CCDS32701.1 | ENSP00000354927 | Q99759   |
| YES | CCDS59385.1 | ENSP00000465039 | Q92918   |
| YES | CCDS56130.1 | ENSP00000314363 | O95819   |
| YES | CCDS2832.1  | ENSP00000396467 | Q16644   |
| YES | CCDS32921.1 | ENSP00000251472 | Q9Y2H9   |
| YES | CCDS32921.1 | ENSP00000251472 | Q9Y2H9   |
| YES | CCDS54861.1 | ENSP00000385727 |          |
| YES | CCDS13348.1 | ENSP00000440328 | O95460   |
| YES | CCDS3241.1  | ENSP00000265594 | Q96RQ3   |
| YES | CCDS13734.1 | ENSP00000380820 | O60318   |
| YES | CCDS47417.1 | ENSP00000402584 | Q8NFP4   |
| YES | CCDS5024.1  | ENSP00000358400 | Q9NU22   |
| YES | CCDS5024.1  | ENSP00000358400 | Q9NU22   |
| YES | CCDS48193.1 | ENSP00000395535 | P51608   |
| YES | CCDS14254.1 | ENSP00000323720 | O60244   |
| YES | CCDS6963.1  | ENSP00000420393 | Q15528   |
| YES | CCDS33075.1 | ENSP00000326767 | Q71SY5   |
| YES | CCDS33021.1 | ENSP00000314343 |          |
| YES | CCDS46024.1 | ENSP00000162023 | Q02080   |
| YES | CCDS41237.1 | ENSP00000348982 | O75095   |
| YES | CCDS45846.1 | ENSP00000269202 | Q16820   |
| YES | CCDS2094.1  | ENSP00000295408 | Q12866   |
| YES | CCDS32044.1 | ENSP00000298717 | Q86U44   |
| YES |             | ENSP00000364407 | E7ETE0,1 |
| YES | CCDS42464.1 | ENSP00000381566 | Q6NUT3   |
| YES | CCDS45788.1 | ENSP00000391227 | Q3V5L5   |
| YES | CCDS45788.1 | ENSP00000391227 | Q3V5L5   |
| YES | CCDS45788.1 | ENSP00000391227 | Q3V5L5   |
| YES | CCDS7660.2  | ENSP00000302111 | P16455   |
| YES | CCDS46659.1 | ENSP00000416015 | Q7RTP6   |
| YES | CCDS46659.1 | ENSP00000416015 | Q7RTP6   |
| YES | CCDS46659.1 | ENSP00000416015 | Q7RTP6   |
| YES | CCDS14138.1 | ENSP00000312678 | O15344   |



VEP annotated somatic variants

|     |             |                 |             |
|-----|-------------|-----------------|-------------|
| YES | CCDS45588.1 | ENSP00000347427 | Q8N4C8      |
| YES | CCDS45588.1 | ENSP00000347427 | Q8N4C8      |
| YES | CCDS9206.1  | ENSP00000228506 | Q14165      |
| YES | CCDS1598.1  | ENSP00000355583 | Q5TCX8      |
| YES | CCDS12160.1 | ENSP00000252674 | Q03111      |
| YES | CCDS7647.1  | ENSP00000357798 | Q8N119      |
| YES | CCDS34788.1 | ENSP00000252971 | P50219      |
| YES | CCDS12081.1 | ENSP00000349575 | Q96BX8      |
| YES | CCDS14525.2 | ENSP00000347821 | Q8TE76      |
| YES | CCDS14525.2 | ENSP00000347821 | Q8TE76      |
|     |             | ENSP00000368850 | H0YNX3,H0YN |
| YES | CCDS8392.1  | ENSP00000278949 | Q6UWV2      |
| YES | CCDS8299.1  | ENSP00000325863 | P49959      |
| YES | CCDS41342.2 | ENSP00000396622 | Q68CQ1      |
| YES | CCDS41342.2 | ENSP00000396622 | Q68CQ1      |
| YES | CCDS41342.2 | ENSP00000396622 | Q68CQ1      |
| YES | CCDS11517.1 | ENSP00000290208 | Q7Z7H8      |
| YES | CCDS7046.1  | ENSP00000360498 | Q8IXM3      |
| YES | CCDS7504.1  | ENSP00000339844 |             |
| YES | CCDS4866.1  | ENSP00000053468 | P82664      |
| YES | CCDS55746.1 | ENSP00000412130 | Q9Y6F6      |
| YES | CCDS1834.1  | ENSP00000233146 | P43246      |
| YES | CCDS3809.1  | ENSP00000261507 | Q15800      |
| YES | CCDS127.1   | ENSP00000354558 | P42345      |
| YES | CCDS1614.1  | ENSP00000355536 | Q99707      |
| YES | CCDS1614.1  | ENSP00000355536 | Q99707      |
| YES | CCDS1614.1  | ENSP00000355536 | Q99707      |
| YES | CCDS1614.1  | ENSP00000355536 | Q99707      |
| YES | CCDS3651.1  | ENSP00000400821 | P55157      |
| YES | CCDS54212.1 | ENSP00000381008 |             |
| YES | CCDS54212.1 | ENSP00000381008 |             |
| YES |             | ENSP00000476404 |             |
| YES |             | ENSP00000476404 |             |
| YES |             | ENSP00000415183 | Q9UM        |
| YES | CCDS10968.1 | ENSP00000301012 | P53602      |
| YES | CCDS14124.1 | ENSP00000217939 | Q9NR99      |
| YES | CCDS45815.1 | ENSP00000386702 | A6NDP7      |
| YES | CCDS53621.1 | ENSP00000442795 | Q14896      |
| YES | CCDS45423.1 | ENSP00000379616 | P35749      |
| YES | CCDS43127.1 | ENSP00000273353 | Q9Y2K3      |
| YES | CCDS9601.1  | ENSP00000347507 | P12883      |
| YES | CCDS9601.1  | ENSP00000347507 | P12883      |
| YES | CCDS9601.1  | ENSP00000347507 | P12883      |
| YES | CCDS13927.1 | ENSP00000216181 | P35579      |
| YES | CCDS46896.1 | ENSP00000353452 | Q15746      |
| YES | CCDS42271.1 | ENSP00000205890 | Q9UKN7      |
| YES | CCDS54507.1 | ENSP00000334563 |             |
| YES | CCDS54112.1 | ENSP00000409936 | Q96H55      |
| YES | CCDS42494.1 | ENSP00000344871 | O00160      |
| YES | CCDS42037.1 | ENSP00000382177 | Q9Y4I1      |
| YES | CCDS46010.1 | ENSP00000471457 | Q13459      |
| YES | CCDS1433.1  | ENSP00000241651 | P15173      |
| YES | CCDS7275.1  | ENSP00000351790 | Q86TC9      |
| YES | CCDS44622.1 | ENSP00000278836 | Q9Y2G1      |
| YES | CCDS41343.1 | ENSP00000418734 | Q5VVJ2      |

VEP annotated somatic variants

|     |             |                 |        |
|-----|-------------|-----------------|--------|
| YES | CCDS6673.1  | ENSP00000354972 | Q5VZE5 |
| YES | CCDS6993.1  | ENSP00000360818 | Q96BF6 |
| YES | CCDS10527.1 | ENSP00000310998 | Q9UK23 |
| YES | CCDS12794.1 | ENSP00000253719 | O96009 |
| YES | CCDS11706.1 | ENSP00000350467 | Q9BTE0 |
| YES | CCDS1685.1  | ENSP00000281513 | A2RRP1 |
| YES | CCDS45694.1 | ENSP00000411250 | Q14596 |
| YES | CCDS45694.1 | ENSP00000411250 | Q14596 |
| YES | CCDS45694.1 | ENSP00000411250 | Q14596 |
| YES | CCDS45694.1 | ENSP00000411250 | Q14596 |
| YES | CCDS12397.1 | ENSP00000252575 | O14594 |
| YES | CCDS8548.1  | ENSP00000325017 | Q15021 |
| YES | CCDS31723.1 | ENSP00000433681 | P42695 |
| YES | CCDS2021.1  | ENSP00000240423 | Q15003 |
| YES | CCDS13241.1 | ENSP00000363929 | Q14686 |
| YES | CCDS11175.1 | ENSP00000268712 | O75376 |
| YES | CCDS1224.1  | ENSP00000356972 | O75306 |
| YES | CCDS54407.1 | ENSP00000380505 |        |
| YES | CCDS54407.1 | ENSP00000380505 |        |
| YES | CCDS54407.1 | ENSP00000380505 |        |
| YES | CCDS3358.2  | ENSP00000372335 | Q9H3P2 |
| YES | CCDS1505.1  | ENSP00000355955 | Q9UMX5 |
| YES | CCDS1505.1  | ENSP00000355955 | Q9UMX5 |
| YES | CCDS41351.1 | ENSP00000333938 | Q0ZGT2 |
| YES | CCDS3657.1  | ENSP00000226574 | P19838 |
| YES | CCDS41564.1 | ENSP00000358983 | Q00653 |
| YES | CCDS2946.1  | ENSP00000325663 | Q9BYH8 |
| YES | CCDS4542.1  | ENSP00000345464 | Q6VVB1 |
| YES | CCDS55063.1 | ENSP00000394546 | Q5SYE7 |
| YES | CCDS1608.1  | ENSP00000264187 | P14543 |
| YES | CCDS32079.1 | ENSP00000371472 | Q8N4C6 |
| YES | CCDS30631.1 | ENSP00000363520 | Q6P499 |
| YES | CCDS47328.1 | ENSP00000311687 | Q0D2K0 |
| YES | CCDS3920.1  | ENSP00000282516 | Q6KC79 |
| YES | CCDS13860.1 | ENSP00000216121 | Q9BPW8 |
| YES | CCDS33767.1 | ENSP00000339958 | Q9Y2I1 |
| YES | CCDS9660.1  | ENSP00000258829 | O15522 |
| YES | CCDS55441.1 | ENSP00000351591 | Q9NZ94 |
| YES | CCDS33174.1 | ENSP00000385090 | Q9NPP4 |
| YES | CCDS12938.1 | ENSP00000375063 | P59047 |
| YES | CCDS12938.1 | ENSP00000375063 | P59047 |
| YES | CCDS12938.1 | ENSP00000375063 | P59047 |
| YES | CCDS12934.1 | ENSP00000331857 | Q7RTR0 |
| YES | CCDS9277.1  | ENSP00000328854 | Q9BVI4 |
| YES | CCDS6543.1  | ENSP00000297990 | Q9H6R4 |
| YES | CCDS33945.1 | ENSP00000405068 | P78316 |
| YES | CCDS13030.1 | ENSP00000370589 | O00567 |
| YES | CCDS1237.1  | ENSP00000355133 | O75052 |
| YES | CCDS5912.1  | ENSP00000297494 | P29474 |
| YES | CCDS5912.1  | ENSP00000297494 | P29474 |
| YES | CCDS43905.1 | ENSP00000277541 | P46531 |
| YES | CCDS43905.1 | ENSP00000277541 | P46531 |
| YES | CCDS5491.1  | ENSP00000289547 | Q9UHC9 |
| YES | CCDS53539.1 | ENSP00000277942 | Q9GZQ6 |
| YES | CCDS5443.1  | ENSP00000352839 | Q6W5P4 |

VEP annotated somatic variants

|     |             |                 |        |
|-----|-------------|-----------------|--------|
| YES | CCDS5657.1  | ENSP00000265634 | P47972 |
| YES | CCDS33718.1 | ENSP00000310006 | Q14995 |
| YES | CCDS41429.1 | ENSP00000356959 | Q14994 |
| YES | CCDS9890.1  | ENSP00000346335 | Q9H7Z3 |
| YES | CCDS4412.1  | ENSP00000395929 | Q96L73 |
| YES | CCDS3869.1  | ENSP00000264670 | Q08J23 |
| YES | CCDS46843.1 | ENSP00000406933 |        |
| YES | CCDS12754.1 | ENSP00000301411 | P34130 |
| YES | CCDS5490.2  | ENSP00000347626 | Q8IVD9 |
| YES | CCDS9393.1  | ENSP00000368459 | Q9UHK0 |
| YES | CCDS47833.1 | ENSP00000408697 | Q68CJ6 |
| YES | CCDS8985.1  | ENSP00000229179 | P57740 |
| YES | CCDS6940.1  | ENSP00000352400 | P35658 |
| YES | CCDS5218.1  | ENSP00000342262 | Q8NFB3 |
| YES | CCDS14062.1 | ENSP00000345895 | Q9UKX7 |
| YES | CCDS3576.1  | ENSP00000264883 | Q7Z3B4 |
| YES | CCDS3576.1  | ENSP00000264883 | Q7Z3B4 |
| YES | CCDS11070.1 | ENSP00000458954 | Q99567 |
| YES | CCDS11070.1 | ENSP00000458954 | Q99567 |
| YES | CCDS14503.1 | ENSP00000378504 | Q9H4D5 |
| YES | CCDS14491.2 | ENSP00000442401 | Q9H1B4 |
| YES | CCDS14491.2 | ENSP00000442401 | Q9H1B4 |
| YES | CCDS14491.2 | ENSP00000442401 | Q9H1B4 |
| YES | CCDS10998.1 | ENSP00000337443 | Q6DKJ4 |
| YES | CCDS34445.1 | ENSP00000420484 | Q9Y530 |
| YES | CCDS46520.1 | ENSP00000385636 | O75147 |
| YES | CCDS11812.1 | ENSP00000330075 | Q6PK18 |
| YES | CCDS33052.1 | ENSP00000319817 | Q9H6K4 |
| YES | CCDS34696.1 | ENSP00000313936 | Q8NHA4 |
| YES | CCDS11023.1 | ENSP00000313803 | P47881 |
| YES | CCDS31499.1 | ENSP00000325128 | Q8NH70 |
| YES | CCDS31497.1 | ENSP00000367664 | Q8NH83 |
| YES | CCDS31502.1 | ENSP00000324913 | Q8NGL9 |
| YES | CCDS7757.1  | ENSP00000369573 | Q9Y5P0 |
| YES | CCDS31398.1 | ENSP00000322823 | Q8NH53 |
| YES | CCDS32042.1 | ENSP00000302057 | Q8NGC0 |
| YES | CCDS33799.1 | ENSP00000373195 | A6NDH6 |
| YES | CCDS7949.1  | ENSP00000301532 | Q13606 |
| YES | CCDS31525.1 | ENSP00000323612 | Q8NG75 |
| YES | CCDS13495.1 | ENSP00000316649 | Q9H1P3 |
| YES | CCDS10939.1 | ENSP00000355374 | Q9UJX0 |
| YES | CCDS10939.1 | ENSP00000355374 | Q9UJX0 |
| YES | CCDS3928.1  | ENSP00000274276 | Q99650 |
| YES | CCDS10026.1 | ENSP00000305926 | Q8TE49 |
| YES | CCDS9573.1  | ENSP00000285848 |        |
| YES | CCDS14398.1 | ENSP00000363643 | P51582 |
| YES | CCDS11787.1 | ENSP00000327801 | P07237 |
| YES | CCDS44115.1 | ENSP00000361949 | Q13310 |
| YES | CCDS8129.1  | ENSP00000316454 | Q6VY07 |
| YES | CCDS14368.1 | ENSP00000289619 | Q96GU1 |
| YES | CCDS32857.1 | ENSP00000341911 | O75781 |
| YES | CCDS31244.1 | ENSP00000302108 | Q8TE04 |
| YES | CCDS31244.1 | ENSP00000302108 | Q8TE04 |
| YES | CCDS42.1    | ENSP00000367727 | Q9NVE7 |
| YES | CCDS1863.1  | ENSP00000238714 | Q9BWT3 |

VEP annotated somatic variants

|     |             |                 |        |
|-----|-------------|-----------------|--------|
| YES | CCDS597.1   | ENSP00000360327 | Q7L3T8 |
| YES | CCDS44541.2 | ENSP00000334008 |        |
| YES | CCDS46724.1 | ENSP00000384515 | Q9HBI1 |
| YES | CCDS46398.1 | ENSP00000395498 | Q06710 |
| YES | CCDS5190.1  | ENSP00000432353 | Q9GZY1 |
| YES | CCDS44404.1 | ENSP00000354950 |        |
| YES | CCDS9444.1  | ENSP00000442186 | Q9HC56 |
| YES | CCDS47630.1 | ENSP00000334319 | Q9Y6V0 |
| YES | CCDS59041.1 | ENSP00000356354 |        |
| YES | CCDS33592.1 | ENSP00000352572 | O95613 |
| YES | CCDS33772.1 | ENSP00000309142 | Q6L8Q7 |
| YES | CCDS2285.1  | ENSP00000410309 | P54750 |
| YES | CCDS8216.1  | ENSP00000334910 | O00408 |
| YES | CCDS7429.1  | ENSP00000360502 | P51160 |
| YES | CCDS3495.1  | ENSP00000257290 | P16234 |
| YES | CCDS4303.1  | ENSP00000261799 | P09619 |
| YES | CCDS4303.1  | ENSP00000261799 | P09619 |
| YES | CCDS31168.1 | ENSP00000365388 | Q5T2R2 |
| YES | CCDS32393.1 | ENSP00000379691 | Q6P996 |
| YES | CCDS32393.1 | ENSP00000379691 | Q6P996 |
| YES | CCDS31269.1 | ENSP00000359234 | Q9H5P4 |
| YES | CCDS42062.1 | ENSP00000452796 | Q9H792 |
| YES | CCDS30892.1 | ENSP00000344465 | Q5VY43 |
| YES | CCDS30892.1 | ENSP00000344465 | Q5VY43 |
| YES | CCDS30892.1 | ENSP00000344465 | Q5VY43 |
| YES | CCDS42544.1 | ENSP00000244137 | P12955 |
| YES | CCDS42544.1 | ENSP00000244137 | P12955 |
| YES | CCDS7059.1  | ENSP00000370517 | Q01813 |
| YES | CCDS7059.1  | ENSP00000370517 | Q01813 |
| YES | CCDS2318.1  | ENSP00000346809 | Q75T13 |
| YES | CCDS14438.1 | ENSP00000362413 | P00558 |
| YES | CCDS12330.2 | ENSP00000345968 | Q96PD5 |
| YES | CCDS1035.1  | ENSP00000290722 | Q96LB9 |
| YES | CCDS35069.1 | ENSP00000352185 | O75151 |
| YES | CCDS4987.1  | ENSP00000275034 | Q8WWQ0 |
| YES | CCDS14421.1 | ENSP00000362643 | P46020 |
| YES | CCDS8401.1  | ENSP00000354498 | Q86UU1 |
| YES | CCDS44507.1 | ENSP00000410626 | Q9P1Y6 |
| YES | CCDS833.1   | ENSP00000358753 | Q8TCI5 |
| YES | CCDS674.1   | ENSP00000359848 | Q92643 |
| YES | CCDS45879.1 | ENSP00000350263 | O95427 |
| YES | CCDS11313.1 | ENSP00000468778 | Q7Z7B1 |
| YES | CCDS11147.1 | ENSP00000392812 | Q8WYR1 |
| YES | CCDS2382.1  | ENSP00000264380 | Q9Y2I7 |
| YES | CCDS33678.1 | ENSP00000353824 | Q86V86 |
| YES | CCDS33623.1 | ENSP00000330031 | Q7Z3Z3 |
| YES | CCDS14393.1 | ENSP00000355014 | Q8NG27 |
| YES | CCDS4935.1  | ENSP00000360158 | P08F94 |
| YES | CCDS8731.1  | ENSP00000070846 | Q99959 |
| YES | CCDS4917.1  | ENSP00000274793 | Q13093 |
| YES | CCDS6126.1  | ENSP00000220809 | P00750 |
| YES | CCDS33168.1 | ENSP00000330442 | Q6P1J6 |
| YES | CCDS41552.1 | ENSP00000360431 | Q9P212 |
| YES | CCDS41552.1 | ENSP00000360431 | Q9P212 |

VEP annotated somatic variants

|     |             |                 |        |
|-----|-------------|-----------------|--------|
| YES | CCDS41552.1 | ENSP00000360431 | Q9P212 |
| YES | CCDS41552.1 | ENSP00000360431 | Q9P212 |
| YES | CCDS42204.1 | ENSP00000352336 | P16885 |
| YES |             | ENSP00000397289 | O75038 |
| YES |             | ENSP00000397289 | O75038 |
| YES | CCDS43772.1 | ENSP00000323856 | Q15149 |
| YES | CCDS43772.1 | ENSP00000323856 | Q15149 |
| YES | CCDS43772.1 | ENSP00000323856 | Q15149 |
| YES | CCDS43772.1 | ENSP00000323856 | Q15149 |
| YES | CCDS43772.1 | ENSP00000323856 | Q15149 |
| YES | CCDS43772.1 | ENSP00000323856 | Q15149 |
| YES | CCDS57969.1 | ENSP00000439625 | O94827 |
| YES | CCDS45128.1 | ENSP00000330278 | Q9ULM0 |
| YES | CCDS45128.1 | ENSP00000330278 | Q9ULM0 |
| YES | CCDS45128.1 | ENSP00000330278 | Q9ULM0 |
| YES | CCDS4.1     | ENSP00000368720 | Q494U1 |
| YES | CCDS59328.1 | ENSP00000466248 | Q496M5 |
| YES | CCDS11333.1 | ENSP00000323927 | Q8IUK5 |
| YES | CCDS43035.1 | ENSP00000409171 | O15031 |
| YES | CCDS5043.1  | ENSP00000358242 | Q8TF01 |
| YES | CCDS54997.1 | ENSP00000378072 | Q8N8W4 |
| YES | CCDS14054.1 | ENSP00000216180 | Q9NST1 |
| YES | CCDS54206.1 | ENSP00000407509 | Q8IY17 |
| YES | CCDS55860.1 | ENSP00000447852 |        |
| YES | CCDS31585.1 | ENSP00000301788 | P62487 |
| YES | CCDS13135.1 | ENSP00000366828 | Q9H1D9 |
| YES | CCDS13135.1 | ENSP00000366828 | Q9H1D9 |
| YES | CCDS9364.1  | ENSP00000369071 | Q15063 |
| YES | CCDS55274.1 | ENSP00000419298 | Q06416 |
| YES | CCDS2609.1  | ENSP00000287820 | P37231 |
| YES | CCDS2609.1  | ENSP00000287820 | P37231 |
| YES | CCDS46670.1 | ENSP00000390427 | Q13356 |
| YES | CCDS11613.1 | ENSP00000312411 | Q8WY54 |
| YES | CCDS1221.1  | ENSP00000356978 | P50336 |
| YES | CCDS32767.1 | ENSP00000331065 | Q86WC6 |
| YES |             | ENSP00000399970 | Q66LE6 |
| YES | CCDS3087.1  | ENSP00000264977 | Q06190 |
| YES | CCDS14309.1 | ENSP00000218224 | O60828 |
| YES | CCDS3716.1  | ENSP00000264808 | Q9NQX1 |
| YES | CCDS43243.1 | ENSP00000339764 | Q9NQV8 |
| YES | CCDS14206.1 | ENSP00000368646 | Q13162 |
| YES | CCDS14206.1 | ENSP00000368646 | Q13162 |
| YES | CCDS14206.1 | ENSP00000368646 | Q13162 |
| YES | CCDS5053.1  | ENSP00000358106 | P48147 |
| YES | CCDS6201.1  | ENSP00000288368 | Q70Z35 |
| YES | CCDS7955.1  | ENSP00000312134 | P13727 |
| YES | CCDS3837.1  | ENSP00000313816 | Q96LW4 |
| YES | CCDS2870.1  | ENSP00000378217 | Q05655 |
| YES | CCDS2870.1  | ENSP00000378217 | Q05655 |
| YES | CCDS37.1    | ENSP00000367830 | Q05513 |
| YES | CCDS9579.1  | ENSP00000319169 | O14744 |
| YES | CCDS45933.1 | ENSP00000407653 | Q8IZ63 |
| YES | CCDS56232.1 | ENSP00000384848 | P85299 |
| YES |             | ENSP00000262731 |        |
| YES | CCDS32436.1 | ENSP00000268281 | Q5K4E3 |

VEP annotated somatic variants

|     |             |                 |        |
|-----|-------------|-----------------|--------|
| YES | CCDS47982.1 | ENSP00000365908 | Q8WUY3 |
| YES | CCDS12616.1 | ENSP00000385706 | P11465 |
| YES |             | ENSP00000421986 |        |
| YES | CCDS12618.1 | ENSP00000270077 | Q00887 |
| YES | CCDS11669.1 | ENSP00000348442 | O00232 |
| YES | CCDS13660.1 | ENSP00000329915 | O95456 |
| YES | CCDS11862.1 | ENSP00000325919 | Q969U7 |
| YES | CCDS6779.1  | ENSP00000385763 | Q14914 |
| YES | CCDS7657.1  | ENSP00000254667 | P23469 |
| YES | CCDS489.2   | ENSP00000353030 | P10586 |
| YES | CCDS2895.1  | ENSP00000418112 | P23470 |
| YES | CCDS47473.1 | ENSP00000357196 | Q15262 |
| YES | CCDS5947.1  | ENSP00000374069 | Q92932 |
| YES | CCDS32362.1 | ENSP00000293922 | Q96A99 |
| YES | CCDS44099.1 | ENSP00000391723 | Q14671 |
| YES | CCDS44099.1 | ENSP00000391723 | Q14671 |
| YES | CCDS44099.1 | ENSP00000391723 | Q14671 |
| YES | CCDS44099.1 | ENSP00000391723 | Q14671 |
| YES | CCDS10155.1 | ENSP00000302327 | Q9Y3Y4 |
| YES | CCDS31755.1 | ENSP00000240651 | Q8WU10 |
| YES | CCDS11267.1 | ENSP00000312837 | Q86YS3 |
| YES | CCDS2520.1  | ENSP00000264601 | Q9H0T7 |
| YES | CCDS8281.1  | ENSP00000243662 | P57729 |
| YES | CCDS35322.2 | ENSP00000276066 | Q5JT25 |
| YES | CCDS45592.1 | ENSP00000262477 | Q15276 |
| YES | CCDS45088.1 | ENSP00000382341 | Q92696 |
| YES | CCDS11798.1 | ENSP00000304283 | P60763 |
| YES | CCDS9789.1  | ENSP00000419471 | O15315 |
| YES | CCDS43544.1 | ENSP00000382492 | Q96JH8 |
| YES | CCDS2612.1  | ENSP00000251849 | P04049 |
| YES | CCDS54839.1 | ENSP00000427123 | Q9P0K7 |
| YES | CCDS53277.1 | ENSP00000290101 | P47736 |
| YES | CCDS41775.1 | ENSP00000395708 | O95398 |
| YES | CCDS7936.1  | ENSP00000298854 | Q13702 |
| YES | CCDS2820.1  | ENSP00000349547 | Q9NS23 |
| YES | CCDS14274.1 | ENSP00000366829 | P98175 |
| YES | CCDS9462.1  | ENSP00000267229 | Q5T8P6 |
| YES | CCDS43378.1 | ENSP00000265271 | Q9P2N5 |
| YES | CCDS34876.1 | ENSP00000340176 | Q93062 |
| YES | CCDS6597.1  | ENSP00000367202 | O95980 |
| YES | CCDS46110.1 | ENSP00000221452 | Q01201 |
| YES | CCDS5193.2  | ENSP00000258062 | Q96D71 |
| YES | CCDS2953.1  | ENSP00000295755 | Q9BQ08 |
| YES | CCDS13857.2 | ENSP00000346342 | O75677 |
| YES | CCDS2869.1  | ENSP00000296292 | Q96AA3 |
| YES | CCDS2869.1  | ENSP00000296292 | Q96AA3 |
| YES | CCDS33712.1 | ENSP00000334153 | Q14699 |
| YES | CCDS54221.1 | ENSP00000377075 | Q3MIN7 |
| YES | CCDS31071.1 | ENSP00000355523 | P49802 |
| YES |             | ENSP00000444196 |        |
| YES | CCDS13675.1 | ENSP00000332454 | P57078 |
| YES | CCDS1991.1  | ENSP00000283632 | Q9H871 |
| YES | CCDS1991.1  | ENSP00000283632 | Q9H871 |
| YES | CCDS12282.1 | ENSP00000221486 | O75792 |
| YES | CCDS1347.1  | ENSP00000356530 | Q05823 |

VEP annotated somatic variants

|     |             |                 |        |
|-----|-------------|-----------------|--------|
| YES | CCDS11452.1 | ENSP00000466680 | P52198 |
| YES | CCDS47149.1 | ENSP00000340979 | Q8N4F7 |
| YES | CCDS372.2   | ENSP00000362555 | Q6ZMZ0 |
| YES | CCDS45608.1 | ENSP00000382330 | A6NCQ9 |
| YES | CCDS54611.1 | ENSP00000420321 | Q9Y6N7 |
| YES | CCDS54611.1 | ENSP00000420321 | Q9Y6N7 |
| YES | CCDS42654.1 | ENSP00000317985 | O75116 |
| YES | CCDS626.1   | ENSP00000360120 | Q01973 |
| YES | CCDS5116.1  | ENSP00000357494 | P08922 |
| YES |             | ENSP00000401535 |        |
| YES |             |                 |        |
| YES |             | ENSP00000473658 |        |
| YES |             |                 |        |
| YES | CCDS8753.1  | ENSP00000005386 | Q9H6T3 |
| YES | CCDS10994.1 | ENSP00000328977 | Q9UNE2 |
| YES | CCDS12367.1 | ENSP00000222247 | Q02543 |
| YES | CCDS11241.1 | ENSP00000389103 | P62750 |
| YES | CCDS11241.1 | ENSP00000389103 | P62750 |
| YES | CCDS13988.1 | ENSP00000346001 | P39023 |
| YES | CCDS14418.1 | ENSP00000362744 | P62701 |
| YES | CCDS34570.1 | ENSP00000427015 | Q15349 |
| YES | CCDS11773.1 | ENSP00000307272 | Q8N122 |
| YES | CCDS11773.1 | ENSP00000307272 | Q8N122 |
| YES | CCDS33577.1 | ENSP00000339145 | Q14684 |
| YES | CCDS33577.1 | ENSP00000339145 | Q14684 |
| YES | CCDS11569.1 | ENSP00000258955 | Q9HA92 |
| YES | CCDS7112.1  | ENSP00000367154 | Q15404 |
| YES | CCDS58141.1 | ENSP00000367050 | O95197 |
| YES | CCDS4445.2  | ENSP00000325594 | Q96T51 |
| YES | CCDS4445.2  | ENSP00000325594 | Q96T51 |
| YES | CCDS41534.1 | ENSP00000373420 | Q8WXA3 |
| YES | CCDS35172.1 | ENSP00000419692 | P19793 |
| YES | CCDS33011.1 | ENSP00000352608 | P21817 |
| YES | CCDS33011.1 | ENSP00000352608 | P21817 |
| YES | CCDS33011.1 | ENSP00000352608 | P21817 |
| YES | CCDS33011.1 | ENSP00000352608 | P21817 |
| YES | CCDS55691.1 | ENSP00000355533 | Q92736 |
| YES | CCDS55691.1 | ENSP00000355533 | Q92736 |
| YES | CCDS45210.1 | ENSP00000373884 | Q15413 |
| YES | CCDS9295.2  | ENSP00000371973 |        |
| YES | CCDS6978.1  | ENSP00000360938 | Q9UL12 |
| YES | CCDS5537.1  | ENSP00000246868 | Q9Y3A5 |
| YES | CCDS14091.2 | ENSP00000370196 | O95248 |
| YES | CCDS31427.1 | ENSP00000256190 | Q86WG5 |
| YES | CCDS33074.1 | ENSP00000353769 | Q9H7N4 |
| YES | CCDS1105.1  | ENSP00000307275 | O14828 |
| YES | CCDS13779.1 | ENSP00000266214 | Q96GP6 |
| YES | CCDS9459.1  | ENSP00000302579 | O95171 |
| YES | CCDS47545.1 | ENSP00000297029 | Q9Y6U3 |
| YES | CCDS3740.1  | ENSP00000281142 | Q96NL6 |
| YES | CCDS3740.1  | ENSP00000281142 | Q96NL6 |
| YES | CCDS5060.2  | ENSP00000358016 | Q8N228 |
| YES | CCDS33312.1 | ENSP00000283254 | Q9NY46 |
| YES | CCDS46441.1 | ENSP00000386306 | Q15858 |

VEP annotated somatic variants

|     |             |                 |        |
|-----|-------------|-----------------|--------|
| YES | CCDS46441.1 | ENSP00000386306 | Q15858 |
| YES | CCDS41473.1 | ENSP00000272091 | Q6IQ49 |
| YES | CCDS34590.1 | ENSP00000385899 | Q7Z5N4 |
| YES | CCDS2599.1  | ENSP00000312122 | P55735 |
| YES | CCDS54518.1 | ENSP00000385695 | B5MCN3 |
| YES | CCDS44281.1 | ENSP00000308339 | Q96JE7 |
| YES | CCDS13137.1 | ENSP00000338844 | Q15437 |
| YES | CCDS3710.1  | ENSP00000280551 | O94855 |
| YES | CCDS7495.1  | ENSP00000359370 | Q9NQW1 |
| YES | CCDS7495.1  | ENSP00000359370 | Q9NQW1 |
| YES | CCDS7495.1  | ENSP00000359370 | Q9NQW1 |
| YES | CCDS7495.1  | ENSP00000359370 | Q9NQW1 |
| YES | CCDS6683.1  | ENSP00000364965 | Q96T21 |
| YES | CCDS11808.1 | ENSP00000269389 | Q8WVN6 |
| YES | CCDS1283.1  | ENSP00000331736 | P16581 |
| YES | CCDS1282.1  | ENSP00000263686 | P16109 |
| YES | CCDS5599.1  | ENSP00000265362 | Q14563 |
| YES | CCDS5599.1  | ENSP00000265362 | Q14563 |
| YES | CCDS2811.1  | ENSP00000002829 | Q13275 |
| YES | CCDS14026.2 | ENSP00000379704 | Q9UH03 |
| YES | CCDS32150.1 | ENSP00000450540 | P01011 |
| YES | CCDS12557.1 | ENSP00000350633 | Q9UHV2 |
| YES | CCDS53838.1 | ENSP00000267197 | Q9UPS6 |
| YES | CCDS53838.1 | ENSP00000267197 | Q9UPS6 |
| YES | CCDS46741.1 | ENSP00000385852 | Q9C0A6 |
| YES | CCDS13833.1 | ENSP00000248933 | Q9BYH1 |
| YES | CCDS10894.1 | ENSP00000305790 | Q15393 |
| YES | CCDS5204.1  | ENSP00000356541 | Q9BWJ5 |
| YES | CCDS31216.1 | ENSP00000362298 | O95470 |
| YES | CCDS32526.1 | ENSP00000268989 | O43147 |
| YES | CCDS32526.1 | ENSP00000268989 | O43147 |
| YES | CCDS14002.1 | ENSP00000248929 | Q96HU1 |
| YES | CCDS55612.1 | ENSP00000418744 | Q9Y371 |
| YES | CCDS31278.1 | ENSP00000348215 | Q5TCZ1 |
| YES | CCDS12799.1 | ENSP00000293441 | Q9Y566 |
| YES | CCDS12799.1 | ENSP00000293441 | Q9Y566 |
| YES | CCDS5942.1  | ENSP00000297261 | Q15465 |
| YES | CCDS14135.1 | ENSP00000370299 | Q13796 |
| YES | CCDS12833.1 | ENSP00000291707 | Q96PQ1 |
| YES | CCDS33575.1 | ENSP00000270162 | P57059 |
| YES | CCDS13646.1 | ENSP00000290399 | Q14190 |
| YES | CCDS41474.1 | ENSP00000355589 | Q9P2F8 |
| YES | CCDS1209.1  | ENSP00000357022 | Q9NQ25 |
| YES | CCDS3482.1  | ENSP00000273861 | Q96EP9 |
| YES | CCDS3614.1  | ENSP00000273905 | Q3KNW5 |
| YES | CCDS34129.1 | ENSP00000264930 | Q9Y666 |
| YES | CCDS5786.1  | ENSP00000194130 | Q9BZW2 |
| YES | CCDS14426.2 | ENSP00000465734 | P36021 |
| YES | CCDS12321.1 | ENSP00000221742 | P48664 |
| YES | CCDS12321.1 | ENSP00000221742 | P48664 |
| YES | CCDS4154.1  | ENSP00000245407 | O76082 |
| YES | CCDS4213.1  | ENSP00000302851 | Q9UHI7 |
| YES | CCDS9903.2  | ENSP00000431840 | Q8NFF2 |
| YES | CCDS55130.1 | ENSP00000400101 | Q9UJS0 |
| YES | CCDS45700.1 | ENSP00000366299 | Q9BZJ4 |



VEP annotated somatic variants

|     |             |                 |        |
|-----|-------------|-----------------|--------|
| YES | CCDS45700.1 | ENSP00000366299 | Q9BZJ4 |
| YES | CCDS11771.2 | ENSP00000355384 | Q86WA9 |
| YES | CCDS10334.1 | ENSP00000378074 | O00337 |
| YES | CCDS10121.1 | ENSP00000315006 | O43868 |
| YES | CCDS6870.1  | ENSP00000362469 | Q9NY64 |
| YES | CCDS34756.1 | ENSP00000367770 | Q969S0 |
| YES | CCDS34524.1 | ENSP00000353557 | Q5T1Q4 |
| YES | CCDS1600.1  | ENSP00000355577 | Q8IY50 |
| YES | CCDS31714.1 | ENSP00000311833 | Q8TED4 |
| YES |             |                 |        |
| YES | CCDS10800.1 | ENSP00000454646 | Q9NVC3 |
| YES | CCDS34948.1 | ENSP00000024061 | Q5BKX6 |
| YES | CCDS5917.1  | ENSP00000419412 | P04920 |
| YES | CCDS12368.1 | ENSP00000222248 | Q92911 |
| YES | CCDS14570.1 | ENSP00000360967 | Q9UN76 |
| YES | CCDS42590.1 | ENSP00000338627 | Q9GZN6 |
| YES | CCDS11256.1 | ENSP00000385822 | P31645 |
| YES | CCDS41317.1 | ENSP00000353791 | P48067 |
| YES | CCDS9590.1  | ENSP00000320378 | Q9UHI5 |
| YES | CCDS9590.1  | ENSP00000320378 | Q9UHI5 |
| YES | CCDS14269.1 | ENSP00000330320 | Q96T83 |
| YES | CCDS3084.1  | ENSP00000311291 | Q92959 |
| YES | CCDS14612.1 | ENSP00000360163 | P28370 |
| YES | CCDS3761.1  | ENSP00000283131 | O60264 |
| YES | CCDS43027.1 | ENSP00000350036 | Q8NDV3 |
| YES | CCDS32110.1 | ENSP00000355110 | Q9H4F8 |
| YES | CCDS13887.1 | ENSP00000351593 | P53814 |
| YES | CCDS53486.1 | ENSP00000373637 | Q9H7B4 |
| YES | CCDS31255.1 | ENSP00000360293 | Q9BX66 |
| YES | CCDS47008.1 | ENSP00000422185 | Q96PQ0 |
| YES | CCDS899.1   | ENSP00000337804 | Q6Q759 |
| YES | CCDS899.1   | ENSP00000337804 | Q6Q759 |
| YES | CCDS35419.1 | ENSP00000359529 | Q5MJ10 |
| YES | CCDS6413.2  | ENSP00000366690 | Q76KD6 |
| YES | CCDS42824.1 | ENSP00000311684 | Q15772 |
| YES | CCDS42824.1 | ENSP00000311684 | Q15772 |
| YES | CCDS12510.1 | ENSP00000301244 | O43291 |
| YES | CCDS7313.1  | ENSP00000362201 | Q92563 |
| YES | CCDS61599.1 | ENSP00000317790 | Q9NRC6 |
| YES | CCDS61599.1 | ENSP00000317790 | Q9NRC6 |
| YES | CCDS10689.2 | ENSP00000262518 | Q6ZRS2 |
| YES |             |                 |        |
| YES |             |                 |        |
| YES |             |                 |        |
| YES | CCDS58815.1 | ENSP00000439378 | Q9Y2M2 |
| YES | CCDS10890.1 | ENSP00000377257 | Q16842 |
| YES | CCDS11747.1 | ENSP00000225276 | Q9UJ37 |
| YES | CCDS11747.1 | ENSP00000225276 | Q9UJ37 |
| YES | CCDS6883.1  | ENSP00000336733 | Q9H4F1 |
| YES | CCDS31888.1 | ENSP00000373539 | Q8WWQ8 |
| YES | CCDS1929.1  | ENSP00000377633 | O95630 |
| YES | CCDS3515.1  | ENSP00000265404 | Q9ULZ2 |
| YES | CCDS53935.1 | ENSP00000290607 | Q9P2P6 |
| YES | CCDS2310.1  | ENSP00000376134 | Q14765 |
| YES | CCDS11423.1 | ENSP00000293328 | P51692 |

VEP annotated somatic variants

|     |             |                 |        |
|-----|-------------|-----------------|--------|
| YES | CCDS55247.1 | ENSP00000428756 |        |
| YES | CCDS10254.1 | ENSP00000319323 | Q9UBI4 |
| YES | CCDS59303.1 | ENSP00000376168 | A8MT69 |
| YES | CCDS5839.1  | ENSP00000275764 | Q7Z7C7 |
| YES | CCDS6851.1  | ENSP00000415968 | Q96SI9 |
| YES | CCDS30798.1 | ENSP00000358810 | Q5VSL9 |
| YES | CCDS34752.1 | ENSP00000249344 | Q9ULQ0 |
| YES | CCDS47499.1 | ENSP00000321826 | Q5T5C0 |
| YES | CCDS8629.1  | ENSP00000075503 | Q6J9G0 |
| YES | CCDS5580.1  | ENSP00000248600 | Q9Y6J8 |
| YES | CCDS3162.1  | ENSP00000355156 | Q9BXA5 |
| YES | CCDS33587.1 | ENSP00000330343 | P55854 |
| YES | CCDS34549.1 | ENSP00000318635 | Q6EEV6 |
| YES | CCDS12536.1 | ENSP00000470252 | O00267 |
| YES | CCDS12536.1 | ENSP00000470252 | O00267 |
| YES | CCDS6701.1  | ENSP00000364621 | Q96L08 |
| YES | CCDS31426.1 | ENSP00000315630 | Q9UH65 |
| YES | CCDS12676.2 | ENSP00000245934 | Q92797 |
| YES |             |                 |        |
| YES | CCDS9761.2  | ENSP00000350719 | Q8WXH0 |
| YES | CCDS9761.2  | ENSP00000350719 | Q8WXH0 |
| YES | CCDS5254.1  | ENSP00000347792 | O15056 |
| YES |             | ENSP00000336775 | O15061 |
| YES | CCDS34054.1 | ENSP00000306015 | Q9UMS6 |
| YES | CCDS5214.1  | ENSP00000356426 | Q9NYJ8 |
| YES | CCDS5214.1  | ENSP00000356426 | Q9NYJ8 |
| YES | CCDS3352.1  | ENSP00000326550 | Q9Y6A5 |
| YES | CCDS35347.1 | ENSP00000361998 | Q5H9L4 |
| YES | CCDS5261.1  | ENSP00000356033 | Q8N103 |
| YES | CCDS5261.1  | ENSP00000356033 | Q8N103 |
| YES | CCDS10394.1 | ENSP00000338093 | A2RTX5 |
| YES | CCDS10394.1 | ENSP00000338093 | A2RTX5 |
| YES | CCDS33698.1 | ENSP00000287652 | Q93075 |
| YES | CCDS33698.1 | ENSP00000287652 | Q93075 |
| YES | CCDS14078.1 | ENSP00000336724 | Q8WUA7 |
| YES | CCDS41901.1 | ENSP00000366863 | O60343 |
| YES | CCDS46770.1 | ENSP00000402935 | Q92609 |
| YES | CCDS54788.1 | ENSP00000273980 | Q8TEA7 |
| YES | CCDS31621.1 | ENSP00000335191 | O75333 |
| YES | CCDS14496.1 | ENSP00000361866 | Q9H3H9 |
| YES | CCDS239.2   | ENSP00000395574 | Q14241 |
| YES | CCDS4282.1  | ENSP00000296702 | O14776 |
| YES | CCDS13881.1 | ENSP00000215838 | P20062 |
| YES | CCDS9987.2  | ENSP00000387303 | Q8NDG6 |
| YES | CCDS55488.1 | ENSP00000403954 | Q9UKZ4 |
| YES |             | ENSP00000429430 | Q9NT68 |
| YES |             | ENSP00000474453 | Q15554 |
| YES | CCDS46339.1 | ENSP00000386869 | O43151 |
| YES | CCDS56042.1 | ENSP00000240361 | Q8IWB6 |
| YES | CCDS11658.1 | ENSP00000258991 | Q8IWB9 |
| YES | CCDS9339.1  | ENSP00000369840 | Q8N6G2 |
| YES | CCDS5248.1  | ENSP00000356134 | Q8WVM0 |
| YES | CCDS14636.2 | ENSP00000385461 | Q5H9I0 |
| YES | CCDS12878.1 | ENSP00000375639 | P0C1Z6 |
| YES | CCDS30770.1 | ENSP00000212355 | Q03167 |

VEP annotated somatic variants

|     |             |                 |        |
|-----|-------------|-----------------|--------|
| YES | CCDS14459.1 | ENSP00000453704 | Q8IUE1 |
| YES | CCDS32213.1 | ENSP00000389466 | Q96PF1 |
| YES | CCDS34574.1 | ENSP00000355751 | P35442 |
| YES | CCDS12025.1 | ENSP00000340088 | Q9P2T0 |
| YES | CCDS47543.1 | ENSP00000406482 | Q9UPZ6 |
| YES | CCDS32053.1 | ENSP00000288014 | Q9BU02 |
| YES | CCDS1805.2  | ENSP00000423933 | Q9BTF0 |
| YES | CCDS13609.1 | ENSP00000286827 | Q13009 |
| YES | CCDS34558.1 | ENSP00000437188 | Q8IVF5 |
| YES | CCDS12136.1 | ENSP00000248244 | Q8IUC6 |
| YES | CCDS12003.1 | ENSP00000169551 | Q9BVV7 |
| YES | CCDS58834.1 | ENSP00000391481 | P29401 |
| YES | CCDS58834.1 | ENSP00000391481 | P29401 |
| YES | CCDS11242.1 | ENSP00000292090 | Q96CP7 |
| YES | CCDS45293.1 | ENSP00000452871 | Q04726 |
| YES | CCDS45293.1 | ENSP00000452871 | Q04726 |
| YES | CCDS11633.1 | ENSP00000275780 | Q86UE8 |
| YES | CCDS3811.1  | ENSP00000061240 | O43897 |
| YES | CCDS7449.1  | ENSP00000350630 | Q9Y6L7 |
| YES | CCDS7449.1  | ENSP00000350630 | Q9Y6L7 |
| YES | CCDS7449.1  | ENSP00000350630 | Q9Y6L7 |
| YES | CCDS32261.1 | ENSP00000453508 | Q9Y4G6 |
| YES | CCDS1947.1  | ENSP00000233638 | O43763 |
| YES | CCDS10878.1 | ENSP00000288025 | Q8WW62 |
| YES | CCDS46368.1 | ENSP00000186436 | Q92545 |
| YES | CCDS5837.1  | ENSP00000275767 | Q9NV12 |
| YES | CCDS47087.1 | ENSP00000420919 | B9EJG8 |
| YES | CCDS14689.1 | ENSP00000359449 | Q8NFB2 |
| YES | CCDS53640.1 | ENSP00000440638 | Q9P0N5 |
| YES | CCDS32567.1 | ENSP00000339830 | Q6QAJ8 |
| YES | CCDS3519.1  | ENSP00000334611 | Q6ZMR5 |
| YES | CCDS5187.1  | ENSP00000237289 | P21580 |
| YES | CCDS6810.1  | ENSP00000223795 | P32971 |
| YES | CCDS47534.1 | ENSP00000395538 | O15417 |
| YES | CCDS11368.1 | ENSP00000254051 | Q8IZW8 |
| YES | CCDS11368.1 | ENSP00000254051 | Q8IZW8 |
| YES | CCDS45250.1 | ENSP00000371475 | Q12888 |
| YES | CCDS45250.1 | ENSP00000371475 | Q12888 |
| YES | CCDS45250.1 | ENSP00000371475 | Q12888 |
| YES | CCDS32817.1 | ENSP00000335144 | Q68CL5 |
| YES | CCDS46007.1 | ENSP00000439135 | P67936 |
| YES | CCDS3856.1  | ENSP00000353785 | O94811 |
| YES | CCDS3856.1  | ENSP00000353785 | O94811 |
| YES | CCDS3292.1  | ENSP00000341031 | Q6ZUI0 |
| YES | CCDS12655.1 | ENSP00000006275 | O75865 |
| YES | CCDS41947.1 | ENSP00000330289 | Q86SZ2 |
| YES | CCDS41947.1 | ENSP00000330289 | Q86SZ2 |
| YES | CCDS4867.1  | ENSP00000362013 | Q96PN7 |
| YES | CCDS35437.1 | ENSP00000333441 | Q9BQ50 |
| YES | CCDS4677.1  | ENSP00000365884 | Q9C019 |
| YES | CCDS4654.1  | ENSP00000366404 | P14373 |
| YES | CCDS1097.1  | ENSP00000334657 | Q7Z4K8 |
| YES | CCDS376.1   | ENSP00000291416 | Q9BVG3 |
| YES | CCDS44333.1 | ENSP00000355613 | Q6ZTA4 |
| YES | CCDS9703.1  | ENSP00000298355 | Q9C026 |

VEP annotated somatic variants

|     |             |                 |        |
|-----|-------------|-----------------|--------|
| YES | CCDS9703.1  | ENSP00000298355 | Q9C026 |
| YES | CCDS3883.1  | ENSP00000339299 | O75962 |
| YES | CCDS5708.1  | ENSP00000200457 | Q15654 |
| YES | CCDS12293.1 | ENSP00000466967 | Q9NXH9 |
| YES | CCDS14477.1 | ENSP00000362027 | Q96GJ1 |
| YES | CCDS13246.1 | ENSP00000252015 | Q8TEL6 |
| YES | CCDS58347.1 | ENSP00000437849 | Q7Z4N2 |
| YES | CCDS31340.1 | ENSP00000155858 | Q9NZQ8 |
| YES | CCDS42035.1 | ENSP00000320239 | Q96QT4 |
| YES | CCDS9134.1  | ENSP00000406191 | Q9HBA0 |
| YES | CCDS6956.1  | ENSP00000298552 | Q92574 |
| YES | CCDS6956.1  | ENSP00000298552 | Q92574 |
| YES | CCDS10458.1 | ENSP00000219476 | P49815 |
| YES | CCDS530.1   | ENSP00000361072 | O60635 |
| YES | CCDS14470.1 | ENSP00000362111 | O43657 |
| YES | CCDS14248.1 | ENSP00000367743 | P41732 |
| YES | CCDS13755.1 | ENSP00000382544 | Q96PF2 |
| YES | CCDS34455.1 | ENSP00000259750 | Q5TCY1 |
| YES | CCDS34455.1 | ENSP00000259750 | Q5TCY1 |
| YES | CCDS7324.3  | ENSP00000310829 |        |
| YES | CCDS11174.2 | ENSP00000261647 | Q6DKK2 |
| YES | CCDS46678.1 | ENSP00000381003 | Q96AY4 |
| YES | CCDS58101.1 | ENSP00000357575 | Q8IYW2 |
| YES | CCDS58101.1 | ENSP00000357575 | Q8IYW2 |
| YES | CCDS58101.1 | ENSP00000357575 | Q8IYW2 |
| YES | CCDS58101.1 | ENSP00000357575 | Q8IYW2 |
| YES | CCDS58101.1 | ENSP00000357575 | Q8IYW2 |
| YES | CCDS58101.1 | ENSP00000357575 | Q8IYW2 |
| YES | CCDS14043.1 | ENSP00000266254 | O95922 |
| YES | CCDS45724.1 | ENSP00000377043 | Q8N841 |
| YES | CCDS7786.1  | ENSP00000305426 | P50607 |
| YES | CCDS10008.1 | ENSP00000283645 | Q96RT8 |
| YES | CCDS14087.1 | ENSP00000248846 | Q96RT7 |
| YES | CCDS34561.1 | ENSP00000356064 | Q9NRJ4 |
| YES | CCDS34561.1 | ENSP00000356064 | Q9NRJ4 |
| YES | CCDS55818.1 | ENSP00000449428 | Q12792 |
| YES | CCDS58811.1 | ENSP00000379038 | P19971 |
| YES | CCDS13687.1 | ENSP00000317327 | P57075 |
| YES | CCDS31694.1 | ENSP00000284273 | Q8TF42 |
| YES | CCDS34789.1 | ENSP00000309198 | Q15386 |
| YES | CCDS189.1   | ENSP00000364403 | Q5T4S7 |
| YES | CCDS43741.1 | ENSP00000382507 | Q14CS0 |
| YES | CCDS8229.1  | ENSP00000323740 | P55916 |
| YES |             |                 |        |
| YES | CCDS6469.1  | ENSP00000276893 | Q96PU4 |
| YES | CCDS43071.1 | ENSP00000301831 | Q96C45 |
| YES | CCDS42935.1 | ENSP00000386126 | Q5DID0 |
| YES | CCDS42935.1 | ENSP00000386126 | Q5DID0 |
| YES | CCDS42935.1 | ENSP00000386126 | Q5DID0 |
| YES | CCDS11292.1 | ENSP00000268876 | Q8IWX7 |
| YES |             | ENSP00000373873 | Q9H9P5 |
| YES |             |                 |        |
| YES | CCDS13827.1 | ENSP00000324343 | Q9UBR1 |
| YES | CCDS14429.1 | ENSP00000362481 | Q96BW1 |
| YES | CCDS31025.1 | ENSP00000305941 | O75445 |
| YES | CCDS12353.1 | ENSP00000252597 | Q8N6Y0 |

VEP annotated somatic variants

|     |             |                 |        |
|-----|-------------|-----------------|--------|
| YES | CCDS45537.1 | ENSP00000219473 | Q14694 |
| YES | CCDS14277.1 | ENSP00000218348 | P51784 |
| YES | CCDS13752.1 | ENSP00000215794 | Q9UMW8 |
| YES | CCDS43892.1 | ENSP00000313811 | Q9Y2K6 |
| YES | CCDS42285.1 | ENSP00000261497 | Q9UPT9 |
| YES | CCDS42686.1 | ENSP00000381577 | Q70CQ2 |
| YES | CCDS34186.1 | ENSP00000296792 | Q8TED0 |
| YES | CCDS9081.1  | ENSP00000261637 | O75691 |
| YES | CCDS9081.1  | ENSP00000261637 | O75691 |
| YES | CCDS14783.1 | ENSP00000328939 | O14607 |
| YES | CCDS7120.1  | ENSP00000446007 | P08670 |
| YES | CCDS5950.1  | ENSP00000262178 | P41587 |
| YES | CCDS1859.1  | ENSP00000408002 | Q86Y07 |
| YES | CCDS9786.1  | ENSP00000450731 | Q9UEU0 |
| YES | CCDS56490.1 | ENSP00000401191 |        |
| YES | CCDS56490.1 | ENSP00000401191 |        |
| YES | CCDS5561.1  | ENSP00000297873 | Q8N6F8 |
| YES | CCDS44385.1 | ENSP00000320563 | Q6ZS81 |
| YES | CCDS7619.1  | ENSP00000263461 | Q9BZH6 |
| YES | CCDS7619.1  | ENSP00000263461 | Q9BZH6 |
| YES | CCDS7619.1  | ENSP00000263461 | Q9BZH6 |
| YES | CCDS7619.1  | ENSP00000263461 | Q9BZH6 |
| YES | CCDS7619.1  | ENSP00000263461 | Q9BZH6 |
| YES | CCDS7619.1  | ENSP00000263461 | Q9BZH6 |
| YES | CCDS3825.1  | ENSP00000280190 | Q8IZU2 |
| YES | CCDS31037.2 | ENSP00000408108 | Q9H7D7 |
| YES | CCDS46251.1 | ENSP00000384302 | Q15061 |
| YES | CCDS33738.1 | ENSP00000307491 | Q8TAF3 |
| YES | CCDS47757.1 | ENSP00000384290 | Q8WVS4 |
| YES | CCDS46063.1 | ENSP00000368025 | Q6ZQQ6 |
| YES | CCDS34758.1 | ENSP00000346466 | A4D1P6 |
| YES | CCDS5339.1  | ENSP00000288828 | Q9Y4P8 |
| YES | CCDS8506.1  | ENSP00000313059 | Q9H4A3 |
| YES | CCDS847.1   | ENSP00000358698 | Q93097 |
| YES | CCDS7494.1  | ENSP00000340677 | Q93098 |
| YES | CCDS4475.1  | ENSP00000370150 | Q96S55 |
| YES | CCDS9186.1  | ENSP00000319474 | Q9NYS7 |
| YES | CCDS54945.1 | ENSP00000427772 | Q8IX03 |
| YES | CCDS10885.1 | ENSP00000352069 | O00308 |
| YES | CCDS32892.1 | ENSP00000351137 | Q9HCS7 |
| YES | CCDS315.1   | ENSP00000362991 | Q9H6D3 |
| YES | CCDS7560.2  | ENSP00000421566 | Q9NQW7 |
| YES | CCDS14007.1 | ENSP00000349658 | Q9NQH7 |
| YES | CCDS47430.1 | ENSP00000265351 | Q9HAV4 |
| YES | CCDS12624.1 | ENSP00000262887 | P18887 |
| YES | CCDS12624.1 | ENSP00000262887 | P18887 |
| YES | CCDS11098.1 | ENSP00000007699 | Q9Y2T7 |
| YES | CCDS55645.1 | ENSP00000357323 | Q9H869 |
| YES | CCDS55645.1 | ENSP00000357323 | Q9H869 |
| YES | CCDS5231.1  | ENSP00000323183 | Q8N680 |
| YES | CCDS47495.1 | ENSP00000237275 | Q5TFG8 |
| YES |             | ENSP00000386616 | A2A288 |
| YES |             | ENSP00000386616 | A2A288 |
| YES |             | ENSP00000386616 | A2A288 |
| YES | CCDS6402.1  | ENSP00000262577 | Q8IXZ2 |
| YES | CCDS14013.1 | ENSP00000345793 | Q9UGR2 |

VEP annotated somatic variants

|     |             |                 |        |     |
|-----|-------------|-----------------|--------|-----|
| YES | CCDS65304.1 | ENSP00000473824 | P0CG32 |     |
| YES | CCDS7460.1  | ENSP00000377357 | Q969W1 |     |
| YES | CCDS7574.1  | ENSP00000358413 | Q9H6R6 |     |
| YES | CCDS45538.1 | ENSP00000456782 | Q9NXF8 |     |
| YES | CCDS5323.1  | ENSP00000314619 | Q8N6M9 |     |
| YES | CCDS55907.1 | ENSP00000413418 | Q9C0A1 |     |
| YES | CCDS47908.1 | ENSP00000384179 | Q8WW38 |     |
| YES | CCDS42025.1 | ENSP00000347498 | Q96K21 |     |
| YES | CCDS5667.1  | ENSP00000377725 | Q9Y2L8 |     |
| YES | CCDS2825.1  | ENSP00000231749 | O75800 |     |
| YES | CCDS2825.1  | ENSP00000231749 | O75800 |     |
| YES | CCDS55529.1 | ENSP00000440847 | O15231 |     |
| YES |             | ENSP00000359271 |        |     |
| YES | CCDS12950.1 | ENSP00000375586 | Q9HCX3 |     |
| YES | CCDS12981.1 | ENSP00000444812 | O75467 |     |
| YES | CCDS7264.1  | ENSP00000387091 | Q70YC5 |     |
| YES | CCDS54211.1 | ENSP00000377504 | Q96IQ9 |     |
| YES | CCDS12498.1 | ENSP00000338770 | Q8TAQ5 |     |
| YES | CCDS12848.1 | ENSP00000470488 | O94892 |     |
| YES | CCDS12266.2 | ENSP00000350576 | Q8N8Z8 |     |
| YES | CCDS14649.1 | ENSP00000339585 | Q6P9G9 |     |
| YES | CCDS42536.1 | ENSP00000376110 | Q6ZR52 |     |
| YES | CCDS13548.1 | ENSP00000393795 | Q96KM6 |     |
| YES | CCDS32317.1 | ENSP00000299927 | Q92610 |     |
| YES |             | ENSP00000411409 | Q86UK7 |     |
| YES | CCDS12847.1 | ENSP00000270649 | Q8N883 |     |
| YES | CCDS42535.1 | ENSP00000469958 | Q68DY1 |     |
| YES | CCDS42539.1 | ENSP00000380310 | Q8N7Q3 |     |
| YES | CCDS44202.1 | ENSP00000396857 | Q5TEC3 |     |
| YES | CCDS32980.1 | ENSP00000349401 | P17019 |     |
| YES |             | ENSP00000409514 |        | E5R |
| YES | CCDS14648.1 | ENSP00000359802 | P51815 |     |
| YES | CCDS10685.1 | ENSP00000378642 | A8K8V0 |     |
| YES | CCDS33096.1 | ENSP00000350295 | Q0VGE8 |     |
| YES | CCDS45164.1 | ENSP00000399863 | A8K0R7 |     |
| YES | CCDS31572.1 | ENSP00000278853 | P60852 |     |
| YES | CCDS10329.2 | ENSP00000410198 | Q7Z7L9 |     |
| YES | CCDS32924.1 | ENSP00000254323 | Q9H7M6 |     |
| YES | CCDS11043.1 | ENSP00000371051 | O43149 |     |

VEP annotated somatic variants

| TREMBL                   | UNIPARC       | RefSeq                                  | SIFT              |
|--------------------------|---------------|-----------------------------------------|-------------------|
|                          | UPI000015F144 | NM_207365.3                             |                   |
|                          | UPI0000160CAE | NM_153698.1                             |                   |
| A4D0W4                   | UPI000004A105 |                                         |                   |
| K7ERP5                   | UPI000013D7F6 | NM_080282.3                             |                   |
|                          | UPI0000001232 | NM_001089.2                             |                   |
|                          | UPI000013DD9D | NM_080284.2                             |                   |
|                          | UPI000013DD9D | NM_080284.2                             |                   |
| K7EJJ0                   | UPI00000747B1 | NM_080283.3                             |                   |
| Q9BV39                   | UPI00001FEEFC | NM_004996.3                             |                   |
|                          | UPI00001AE5CA | NM_001171.5                             |                   |
|                          | UPI0000DBEF32 |                                         |                   |
|                          | UPI0000163938 | NM_138340.4                             |                   |
| I,I3L2P5,I3L2L3,I3L259,B | UPI00001AED3D | _021962.3,NM_001282149.1                |                   |
| Q96EZ6                   | UPI00001BD9D3 |                                         |                   |
|                          | UPI00001251DD | NM_014384.2                             |                   |
| B4DVB1,B4DJE7            | UPI0000EE3287 |                                         |                   |
| B4DQ51                   | UPI00001251DF | NM_001609.3                             |                   |
|                          | UPI000006F1E1 | NM_022735.3                             |                   |
|                          | UPI000003FD52 | NM_133492.2                             |                   |
| F5GWV7                   | UPI0000131FE1 | NM_001610.2                             |                   |
| D6RE60,D6RDP0,D6R92      | UPI0000048EC7 | NM_001037172.1                          |                   |
| H0YNX0,F5H4U6            | UPI000006E955 | _001199377.1,NM_015162.4                |                   |
| 755,F5H5A1,F5H3B2,F5H    | UPI00001AF19E | 1127214.2,NM_001243279.1,NM_001284316.1 |                   |
|                          | UPI0000DD812A | NM_001080454.1                          |                   |
| Q71UM3,Q4VAU9            | UPI00001AF0AE | NM_001106.3                             |                   |
|                          | UPI000035CC78 | NM_207197.2                             | tolerated(0.13)   |
| 340,Q53RS1,Q53RF5,B2F    | UPI00001254D4 | NM_003183.4                             |                   |
|                          | UPI000013E57B | NM_139155.2                             | deleterious(0.01) |
|                          | UPI00001AE729 | NM_014244.4                             |                   |
|                          | UPI00004565F4 | NM_025003.3                             |                   |
|                          | UPI000014194C | NM_005099.4                             |                   |
| Q5IR90                   | UPI000050D3F1 | NM_197941.2                             |                   |
| H7BYE3                   | UPI000004FD83 | NM_001040272.5                          |                   |
|                          | UPI00000503E1 | NM_001048230.1                          |                   |
|                          | UPI000004C602 | NM_020683.6                             |                   |
|                          | UPI0000071FAF | NM_001287824.1                          |                   |
| 2L1,F5GXF9,D6RIZ5,D6R    | UPI000013EC52 | NM_001166693.1                          |                   |
|                          | UPI000049E130 | _002025.3,NM_001169123.1                |                   |
| Q96T14,D3DX07            | UPI0000DAC777 | NM_031946.5                             |                   |
|                          | UPI000192952B | NM_178563.3                             |                   |
| Q53YY0,D3DNG8            | UPI0000039D66 | NM_031850.3                             |                   |
|                          | UPI00000701FB | NM_001134830.1                          |                   |
| Q549J4,H3BSK6            | UPI0000001C48 | NM_016633.2                             |                   |
| Q5THU2,Q5T2H0            | UPI000006F22E | _016108.2,NM_001286587.1                |                   |
| E9PIR9                   | UPI0001F7836C | NM_001039775.3                          |                   |
| E9PIR9                   | UPI0001F7836C | NM_001039775.3                          |                   |
| F1T0C0,F1T0B6            | UPI0000125741 | _014336.3,NM_00103305                   | tolerated(0.08)   |
|                          | UPI0000030FA6 | NM_000383.3                             |                   |
|                          | UPI0000030FA6 | NM_000383.3                             |                   |
| Q8IW64                   | UPI000002A38D | M_147185.2,NM_005751.4                  |                   |
| Q8IW64                   | UPI000002A38D | M_147185.2,NM_005751.4                  |                   |
|                          | UPI00000362E9 | NM_020299.4                             |                   |
|                          | UPI000002C1AC | NM_000477.5                             |                   |

VEP annotated somatic variants

|                       |               |                                 |                                |
|-----------------------|---------------|---------------------------------|--------------------------------|
| F8WBH3                | UPI000013E0FF | NM_153329.3                     |                                |
|                       | UPI00001AF8F8 | NM_000693.2                     |                                |
| E5FPY7                | UPI0000043F84 | _000698.3,NM_001256153.1        |                                |
|                       | UPI000013D013 | NM_020778.4                     |                                |
|                       | UPI000013D013 | NM_020778.4                     |                                |
| Q496M1,E9PNS8,E9PJJ4  | UPI000000D82D | NM_001098526.1                  |                                |
| Q496M1,E9PNS8,E9PJJ4  | UPI000000D82D | NM_001098526.1                  |                                |
|                       | UPI000006EC6E | NM_022662.3                     |                                |
| Q9UMG4                | UPI0000E4453A | NM_001142446.1                  |                                |
| J3KQB7                | UPI00001D7E11 | NM_144708.3                     |                                |
|                       | UPI000000DCCF | NM_178510.1                     |                                |
| 417,F5H2H5,F5H1E7,F5H | UPI00001981FB | NM_015114.1                     |                                |
|                       | UPI0000EE047B | NM_001244752.1                  | tolerated_low_confidence(0.01) |
|                       | UPI000006FC41 | _014915.2,NM_001256053.1        |                                |
|                       | UPI00004120FF | 3,NM_001195098.1,NM_001195099.1 |                                |
|                       | UPI000013E1CE | NM_144698.4                     |                                |
|                       | UPI0000237861 | NM_173595.3                     |                                |
|                       | UPI00004572EF | NM_024669.2                     |                                |
| C9J244,B4DNI5         | UPI0000071863 | NM_001159.3                     |                                |
| Q8NEQ1                | UPI000006F684 |                                 |                                |
| C9J1E7                | UPI000013CED0 | NM_001127.3                     |                                |
| Q8N9K4                | UPI0000167B50 | NM_014203.2                     |                                |
|                       | UPI00001D89D8 | _001252127.1,NM_007347.4        |                                |
|                       | UPI00001D89D8 | _001252127.1,NM_007347.4        | deleterious(0)                 |
|                       | UPI00001AF165 | NM_019043.3                     |                                |
|                       | UPI00001D6936 | NM_198450.5                     |                                |
|                       | UPI00000743B9 | NM_198998.2                     | deleterious(0)                 |
|                       | UPI00000743B9 | NM_198998.2                     |                                |
| F1DSG4,B4DHF5         | UPI0000125D1F | M_001650.4,NM_004028.3          |                                |
|                       | UPI0000457329 | NM_173800.4                     | deleterious(0.01)              |
| F5H6T5,F5H1V1,F5H0C7  | UPI00000012C8 | NM_001659.2                     |                                |
| Q8ND72,Q3KQX3         | UPI000013EA63 | NM_024605.3                     | tolerated(0.59)                |
|                       | UPI0000D60FAD |                                 |                                |
|                       | UPI0000041347 | NM_144967.3                     |                                |
| Q6PJ34,C9JLA8,C9J5M2  | UPI000019275E | NM_001164741.1                  |                                |
|                       | UPI00001D62A7 | NM_198236.2                     |                                |
| B0QZD3                | UPI00002039A3 | NM_014448.3                     |                                |
|                       | UPI000045892C | _001162384.1,NM_001162383.1     |                                |
| C9J609,C9J5K8         | UPI00001B3D98 | NM_001128615.1                  | tolerated(0.07)                |
| E7EUY6,C9JDI6,C9JAD7  | UPI00002132CC | _145735.2,NM_001113511.1        |                                |
|                       | UPI0000509F06 | NM_001017363.1                  |                                |
| B0YIW9                | UPI000006F7A5 | NM_178815.3                     |                                |
| C9J8P8,C9J625,B7Z979  | UPI000007471D | NM_015396.4                     |                                |
| F8W8Y7                | UPI0002466A58 | NM_001256155.1                  |                                |
| F8W8Y7                | UPI0002466A58 | NM_001256155.1                  |                                |
| F8W8Y7                | UPI0002466A58 | NM_001256155.1                  |                                |
| F8W8Y7                | UPI0002466A58 | NM_001256155.1                  |                                |
| Q68DZ5,K7EL17         | UPI0001AE6690 |                                 |                                |
|                       | UPI000003F083 | _015683.1,NM_001286826.1        |                                |
|                       | UPI000003F083 | _015683.1,NM_001286826.1        |                                |
|                       | UPI000013C6C4 | NM_000487.5                     | deleterious(0.05)              |
|                       | UPI00001260C8 | NM_001670.2                     |                                |
|                       | UPI000020F32F |                                 |                                |
|                       | UPI0000E5A753 | _001142733.2,NM_130387.5        |                                |
|                       | UPI00001260E8 | NM_016116.2                     |                                |



VEP annotated somatic variants

|                          |                |                          |                   |
|--------------------------|----------------|--------------------------|-------------------|
|                          | UPI000004A09F  | NM_017873.3              |                   |
|                          | UPI0000456EFC  | NM_182847.2              |                   |
|                          | UPI000007263D  | NM_001251888.1           |                   |
|                          | UPI0000161978  | NM_001002036.3           |                   |
|                          | UPI0000161978  | NM_001002036.3           |                   |
| B7ZKP3,B2RCB6            | UPI00002116D7  | NM_014010.4              |                   |
| K7EQY1                   | UPI000156D0F3  | NM_030632.1              |                   |
| C9JP59,B7ZM20            | UPI0000070EE2  | NM_130768.2              |                   |
| C9JC51,A6NGQ4            | UPI000000DC9F  | NM_032852.3              |                   |
| 5T4,G3V4Y8,G3V334,G3'    | UPI0000073893  | NM_015915.4              |                   |
|                          | UPI00001FCB27  |                          |                   |
| Q8N4D4                   | UPI0000049724  |                          |                   |
| Q58I22                   | UPI0000124FC1  | NM_000702.3              |                   |
| Q13818                   | UPI0000124FC5  | NM_144699.3              |                   |
|                          | UPI0000252110  | NM_014861.2              |                   |
| Q8TAS0,B4DL14,B4DFE6     | UPI0000126574  | NM_001001973.1           |                   |
|                          | UPI000013E478  | NM_000052.5              |                   |
| K7ERI0,K7EQC4            | UPI000013DD54  | NM_005603.4              |                   |
| Q2NLD0,B4DR18            | UPI000004D334  | NM_006045.1              |                   |
| Q2NLD0,B4DR18            | UPI000004D334  | NM_006045.1              |                   |
| C9IZM8                   | UPI0000070A6A  | NM_130384.2              |                   |
| H3BSQ5                   | UPI000016783F  | NM_148414.2              |                   |
|                          | UPI00002122D8  | NM_001013579.2           |                   |
|                          | UPI00001D7BE0  | NM_001002254.1           |                   |
| Q6RDY4,D6RCN1,D6RB8      | UPI000022AC91  | NM_144696.5              | tolerated(0.19)   |
|                          | UPI000012669E  | NM_003502.3              |                   |
| M0R199,M0QX58            | UPI000007021E  | NM_014256.3              | tolerated(0.12)   |
| .2M4,I3L1C8,I3L125,I3L1' | UPI000000D762  | _001144888.1,NM_017451.2 |                   |
|                          | UPI0000071E58  | NM_003933.4              |                   |
| C9J8H7                   | UPI0000231CAC  | NM_001178007.1           | tolerated(0.35)   |
| Q9UMB3,Q59EI3            | UPI0000130BC4  | _000709.3,NM_001164783.1 |                   |
| F2Z3H6                   | UPI000006FE5A  | NM_001707.3              |                   |
| Q9HAM3                   | UPI00001B4EFB  | NM_021946.4              |                   |
| G8JLA7                   | UPI0000232791  | NM_001139443.1           |                   |
|                          | UPI00001AEA67  | NM_001714.2              |                   |
| Q2MD56                   | UPI000006FDD6  | NM_013314.3              |                   |
|                          | UPI000013CD7C  | NM_005448.2              | tolerated(0.3)    |
|                          | UPI0000126796  | NM_001717.3              |                   |
|                          | UPI00000377B0  | NM_025227.2              |                   |
|                          | UPI00002263BF  | NM_182641.3              |                   |
| *,K4K7V3,K4JXS7,K4JUB    | UPI0000E0360B  | NM_007300.3              |                   |
| *,K4K7V3,K4JXS7,K4JUB    | UPI0000E0360B  | NM_007300.3              |                   |
| *,K4K7V3,K4JXS7,K4JUB    | UPI0000E0360B  | NM_007300.3              |                   |
| J77,Q8IU64,K4K7W0,K4.    | UPI00001FCBCC  | NM_000059.3              |                   |
|                          | UPI000020BEBE  | NM_023924.4              |                   |
|                          | UPI0000163C12  | NM_018963.4              |                   |
|                          | UPI00017A7DA9  |                          |                   |
| R4GN83,R4GMX5            | UPI0000051E38  | NM_001728.3              |                   |
| R4GN83,R4GMX5            | UPI0000051E38  | NM_001728.3              |                   |
|                          | UPI000003CEFB9 | NM_144587.2              |                   |
|                          | UPI000003CEFB9 | NM_144587.2              | deleterious(0.01) |
|                          | UPI000014114A  | NM_183242.3              |                   |
| Q6IBC8,F8W0U7            | UPI00000246C2  | NM_001731.2              |                   |
| Q8N324                   | UPI000004C620  | NM_152547.4              |                   |
|                          | UPI000013D7E3  |                          |                   |

VEP annotated somatic variants

|                      |               |                                       |                             |
|----------------------|---------------|---------------------------------------|-----------------------------|
| B1AVV1               | UPI00001F8E63 | NM_001164375.2                        |                             |
|                      | UPI0000161572 |                                       |                             |
| S4R3N7,Q5T025        | UPI00001D808F | NM_001004298.2                        |                             |
| E9PI28               | UPI0000070A8D |                                       |                             |
| F8VVN2               | UPI000004A078 | NM_024738.1                           | tolerated(0.36)             |
| R4GNI2,E9PJL5        | UPI0001F77A4D |                                       |                             |
|                      | UPI00001608A3 | NM_175874.3                           |                             |
|                      | UPI00001FD205 |                                       |                             |
|                      | UPI00001C0FE1 | NM_001145536.1                        |                             |
|                      | UPI0000073E49 | _024032.3,NM_001171251.1              |                             |
| K7EJP2               | UPI000059D617 |                                       | tolerated_low_confidence(0. |
|                      | UPI000006DC1A | NM_033520.1                           |                             |
|                      | UPI000004C659 | NM_001011551.2                        | tolerated(1)                |
|                      | UPI00004701CD | NM_001130957.1                        |                             |
|                      | UPI0000470AFA |                                       |                             |
|                      | UPI000022AE5B | NM_001004303.4                        |                             |
|                      | UPI0000237200 | NM_001002912.4                        |                             |
|                      | UPI0000035539 | NM_198593.3                           |                             |
| C9JP86,C9JEK0        | UPI000049DF42 | NM_001085437.1                        |                             |
| G3XAA6               | UPI0000EE2496 | NM_001145054.1                        |                             |
| Q6LDJ0,M0R1Q1        | UPI000013EC9B | NM_000064.2                           |                             |
| D6RGX5               | UPI00006C511D | NM_001039717.1                        |                             |
|                      | UPI000013C838 | NM_001735.2                           |                             |
|                      | UPI000013C838 | NM_001735.2                           |                             |
|                      | UPI00004573AE | NM_001085401.2                        |                             |
|                      | UPI000020CA08 | NM_000587.2                           |                             |
| I3L375,B4DGL6        | UPI000000167C | NM_020178.4                           |                             |
|                      | UPI0000126DF3 | NM_001739.1                           |                             |
|                      | UPI0000126D6C | NM_001199281.1                        | deleterious(0)              |
| Q9UN69,Q9UHM9        | UPI0000141565 | M_001174080.1,NM_023035.2,NM_000068.3 |                             |
| -I4,Q9HBG3,Q9HBG2,Q9 | UPI0000127267 | _001243812.1,NM_000718.3              |                             |
| Q86XX0,O95234        | UPI0000E593E5 | _199460.2,NM_001129827.1              |                             |
|                      | UPI0000E5A6AF |                                       |                             |
|                      | UPI0000E5A6AF |                                       |                             |
|                      | UPI00001AEA80 | M_201593.2,NM_201596.2                |                             |
|                      | UPI0001C0B380 | NM_001170692.1                        |                             |
| Q7Z2Y9,C9JE79,B4E3I0 | UPI0000140A64 |                                       |                             |
| B4E2Y9               | UPI000004CEC9 | NM_004343.3                           |                             |
|                      | UPI000003CA33 | NM_153498.2                           |                             |
|                      | UPI000013FFDA |                                       |                             |
| D6W5A4               | UPI0000070B33 | NM_024766.4                           |                             |
| Q8WZ12,D6W648        | UPI0000161861 | NM_001080429.2                        |                             |
|                      | UPI00000383D5 | NM_007058.3                           |                             |
|                      | UPI000006E882 | NM_006615.2                           |                             |
| Q96ET4,K7ES72        | UPI00001270F7 | NM_004058.3                           |                             |
| Q17RA1,B7Z3N7,B0QYC  | UPI0000044645 |                                       |                             |
| E5RGG3,E5RFV9        | UPI000022A913 | NM_001184900.1                        |                             |
| B2CIS9               | UPI0000044176 | NM_012114.2                           |                             |
| C9JAC8               | UPI0000204B81 |                                       |                             |
|                      | UPI0000EBB7D6 | NM_001079843.2                        |                             |
| Q32MQ2               | UPI000022A813 | NM_021185.4                           |                             |
|                      | UPI00001270F2 | M_001234.4,NM_033337.2                |                             |
|                      | UPI000013CFBA | NM_033212.3                           |                             |
|                      | UPI000013E20A |                                       |                             |
|                      | UPI0000073091 | NM_173482.2                           | tolerated(0.11)             |

VEP annotated somatic variants

|                       |               |                                   |                   |
|-----------------------|---------------|-----------------------------------|-------------------|
|                       | UPI000014C50D | NM_145020.3                       |                   |
|                       | UPI0001AFF95B | 2.2,NM_001163321.2,NM_001163323.2 |                   |
| A7MD03                | UPI000015F998 | NM_017667.3                       |                   |
| H6QX63                | UPI00001983C7 | NM_199287.2                       |                   |
| B4DK97                | UPI0000160405 | NM_001008723.1                    |                   |
|                       | UPI00004DF23B | NM_001042784.1                    | deleterious(0.03) |
|                       | UPI00017A803A | NM_001198910.1                    |                   |
|                       | UPI0001F78148 |                                   |                   |
|                       | UPI000022A20F |                                   |                   |
|                       | UPI000035B25A | NM_005436.4                       |                   |
| B4DQN0                | UPI0000E5BE97 | NM_001156474.1                    |                   |
| Q6IBD6                | UPI00001362DB | NM_006274.2                       |                   |
| L7REX9,E9PH76,B4XH69  | UPI0000043585 | NM_001123041.2                    |                   |
| N1,Q5XUM8,Q5XUM6,F'   | UPI000013DE92 |                                   | tolerated(0.27)   |
|                       | UPI000042263C | NM_001008784.2                    |                   |
|                       | UPI0000367808 |                                   |                   |
| J3QKQ4                | UPI0000073EA9 | _007261.3,NM_001256841.1          |                   |
| K7EQC8                | UPI0000070847 | NM_012099.1                       | tolerated(0.53)   |
| Q06C42                | UPI000015FF6E | NM_172359.2                       |                   |
| Q29VG3,Q29VG2,J3QLC'  | UPI00000359A4 | NM_006137.6                       |                   |
|                       | UPI000020C69D | NM_004661.3                       |                   |
|                       | UPI000047C9E2 | NM_017525.2                       |                   |
| C9K087                | UPI000042153E | NM_001178010.2                    |                   |
|                       | UPI000013E304 | NM_022842.4                       | tolerated(0.37)   |
|                       | UPI0000126DBD |                                   |                   |
| Q5JQZ9                | UPI0000070643 | NM_015076.3                       |                   |
| K7ELV5,K7EJ83         | UPI0000113587 |                                   |                   |
| D6REC6,D6R9G1         | UPI0000127431 | NM_001799.3                       |                   |
|                       | UPI000013DA21 | NM_017774.3                       |                   |
|                       | UPI0000136103 | NM_001037343.1                    |                   |
|                       | UPI0000001293 | NM_003818.3                       |                   |
| Q7Z560,G8JLG2         | UPI00001AFE92 | NM_001264.4                       |                   |
| Q7Z560,G8JLG2         | UPI00001AFE92 | NM_001264.4                       |                   |
|                       | UPI0000D617B1 |                                   |                   |
| M0QXR5                | UPI000013C7E7 | NM_001815.3                       |                   |
| 7J3,C9IZA8,B4E3Q4,B4D | UPI000013D2E8 | NM_001282228.1                    |                   |
|                       | UPI0001AE62C8 | NM_031413.3                       |                   |
|                       | UPI0001AE62C8 | NM_031413.3                       | deleterious(0.02) |
|                       | UPI000000D9E5 | NM_033070.2                       |                   |
|                       | UPI0000127513 | NM_031890.3                       |                   |
| Q5JX02,Q5JX01         | UPI000004A007 | NM_006733.2                       |                   |
|                       | UPI000013FCDF |                                   | tolerated(0.07)   |
| Q5JWS6,Q5JWS5,G1UI4'  | UPI000006FE8F | NM_007186.3                       |                   |
| Q5JWS6,Q5JWS5,G1UI4'  | UPI000006FE8F | NM_007186.3                       |                   |
| D6RAY6,D6R9Q4         | UPI000006D2FD |                                   |                   |
| D6RAY6,D6R9Q4         | UPI000006D2FD |                                   |                   |
| C9JZ04,C9J0F4         | UPI000013D5A3 | NM_024491.2                       | tolerated(0.69)   |
| K7ENV0,B4DMD2         | UPI000006F4B3 | NM_138363.1                       |                   |
| B7ZBT0,B7ZBS9,B7ZBS9  | UPI000046FF85 | NM_016174.4                       |                   |
| J3QLP1,J3QKN7         | UPI0000074733 | NM_003869.5                       |                   |
|                       | UPI000013C4D1 | NM_000186.3                       | tolerated(1)      |
| ,Q6KEF5,Q6KEE7,Q6KE   | UPI000013C4D4 | NM_000492.3                       |                   |
| J3KP00                | UPI00001619C1 |                                   |                   |
| B5MDZ7                | UPI000020566F | 6336.1,NM_024568.2,NM_004284.4    |                   |
| U3KQ08,F5H829,F5H7R9  | UPI000006FA02 |                                   |                   |

VEP annotated somatic variants

|                       |               |                           |                   |
|-----------------------|---------------|---------------------------|-------------------|
| U3KQ08,F5H829,F5H7R8  | UPI000006FA02 |                           |                   |
| RL9,E9PR52,E9PPX4,E9  | UPI0000126C1A |                           | deleterious(0.03) |
| I3L535,B7Z5H1,B7Z2M6  | UPI0000125257 | NM_000747.2               |                   |
|                       | UPI000004616D | NM_130468.3               |                   |
| I3L2E5                | UPI0000456914 | _000246.3,NM_001286402.1  |                   |
|                       | UPI0001D0C47E |                           |                   |
|                       | UPI0000683C41 | NM_001206999.1            |                   |
| RD8,C9J7P8,C9J300,C9L | UPI0000212358 |                           | tolerated(1)      |
| D6R998,B3KVA7         | UPI000013CE0D | NM_001825.2               |                   |
|                       | UPI000013F2D3 | NM_001286.3               |                   |
|                       | UPI0000127993 |                           |                   |
|                       | UPI0000127AB6 | NM_001185080.1            |                   |
|                       | UPI0000037798 | NM_014358.2               |                   |
|                       | UPI0000169FC8 | NM_001289.4               |                   |
| Q6FIC5,B4DWC4         | UPI0000127AC9 | NM_013943.2               |                   |
| F5H367,F5H270         | UPI0000E00D4E |                           |                   |
| Q4ZFY2,E7EW06,C9IYE4  | UPI000006F0E8 | _024692.4,NM_001287527.1  |                   |
|                       | UPI0000070D72 | NM_014927.3               |                   |
| F2YHU6,B3KPD2         | UPI0000E19A44 | NM_020348.2               |                   |
| H3BT18,H3BPF1,B7Z6X2  | UPI00001FF2F6 | _016284.4,NM_001265612.1  |                   |
| B3KNB0                | UPI00000715FD | NM_017546.4               |                   |
| 35TLS4,Q9BYY6,F8W18;  | UPI00000008AA | 01160258.1,NM_001160226.1 |                   |
| 33XAD4,C9JMQ2,C9JGK   | UPI000007446C | NM_001206955.1            |                   |
| 118,Q75MQ9,Q75MF8,Q75 | UPI00001285FA | NM_014141.5               |                   |
| 118,Q75MQ9,Q75MF8,Q75 | UPI00001285FA | NM_014141.5               |                   |
| Q5JVD3,Q5JVD6,Q5JVD7  | UPI0000211718 |                           |                   |
| C9J9X1                | UPI00001A9480 | NM_015198.3               |                   |
| J3KRB5,J3KNI1,B4DDL2  | UPI000059D3B0 | _015386.2,NM_001195139.1  |                   |
| U3KQU7,B3KMW0         | UPI0000246D05 | NM_006348.3               |                   |
|                       | UPI000006DB58 | NM_000494.3               |                   |
|                       | UPI0000062274 | NM_173465.3               |                   |
| E9PNK8                | UPI000013E81F | NM_152890.5               |                   |
| E9PNK8                | UPI000013E81F | NM_152890.5               |                   |
| C9JPW4                | UPI00004575C9 | _001278563.1,NM_13345     | tolerated(0.09)   |
| B4DU54                | UPI000049E122 | NM_001847.2               |                   |
|                       | UPI00002032A3 | NM_015719.3               |                   |
| Q05BT9                | UPI000019B179 | NM_001848.2               |                   |
| Q8N4Z1,D9ZGF2         | UPI0000456F39 | NM_004369.3               |                   |
| 17KZP0,F2WW53,E7EMS   | UPI0000000CBF | NM_000754.3               |                   |
| B3KM21                | UPI000006D3AA | NM_198076.4               |                   |
|                       | UPI000045718B | NM_000096.3               |                   |
| H3BPD6,H3BNX1,G8JLI7  | UPI000018CEBD | NM_030594.3               |                   |
|                       | UPI000020C179 | NM_030627.2               |                   |
|                       | UPI0000366600 | NM_001006658.2            | tolerated(1)      |
|                       | UPI000022D9DE | NM_173689.5               |                   |
|                       | UPI000002A720 | 01202475.1,NM_001202481.1 |                   |
| R0,Q53TH9,Q4ZG85,B4E  | UPI000004C628 | NM_016441.2               |                   |
| R0,Q53TH9,Q4ZG85,B4E  | UPI000004C628 | NM_016441.2               |                   |
| J3KQX0,I3L0A1         | UPI0001DBC27E | NM_001190986.1            |                   |
|                       | UPI00004A39A7 | NM_016652.5               |                   |
|                       | UPI00001FEB98 |                           |                   |
|                       | UPI00006E232D | NM_153605.3               |                   |
| B4DLE8                | UPI00017A74DC |                           |                   |
|                       | UPI000015FDBE | NM_153478.1               |                   |
|                       | UPI0000000CB5 | NM_177559.2               |                   |

VEP annotated somatic variants

|                        |                |                           |                 |
|------------------------|----------------|---------------------------|-----------------|
|                        | UPI00001AEEB6  | NM_001897.4               |                 |
|                        | UPI000157860F  | NM_001269043.1            |                 |
| M0QZD8                 | UPI0002A474E2  |                           |                 |
| Q5SW23,A6NKP0          | UPI000004A0E6  | NM_013266.2               |                 |
| Q5JTQ9                 | UPI0000070AF1  | NM_003798.2               |                 |
| B3KQA6                 | UPI00001AE8F4  | NM_001081.3               |                 |
| Q5T2B4                 | UPI0000EE4467  | 01198779.1,NM_001198778.1 |                 |
|                        | UPI0001BE8116  | _014780.4,NM_00116837     | deleterious(0)  |
|                        | UPI00001AEB98  | NM_001202543.1            |                 |
|                        | UPI00001AEB98  | NM_001202543.1            | deleterious(0)  |
| B7WP74                 | UPI00001C1DAE  | NM_020943.2               |                 |
| B7WP74                 | UPI00001C1DAE  | NM_020943.2               |                 |
| Q6PIV4                 | UPI000005A81B4 | NM_152434.2               | tolerated(1)    |
|                        | UPI00001A92CE  | NM_001142797.1            |                 |
| 5Y9,F5H5L0,F5H121,F5H  | UPI0000EE44D0  | NM_001161454.1            |                 |
| E9PRM4,E9PMI2,E9PIV9   | UPI000013E5AB  |                           |                 |
|                        | UPI000013E07A  | NM_000766.4               |                 |
|                        | UPI000013E07A  | NM_000766.4               |                 |
| .M0,Q7Z448,Q6GRK0,B4   | UPI000013E0B7  | _001202855.2,NM_017460.5  |                 |
|                        | UPI000013D3F9  | NM_023944.3               | tolerated(0.1)  |
|                        | UPI000013C4D5  | NM_000786.3               |                 |
|                        | UPI00001678B3  | NM_006133.2               |                 |
| Q53R85,D3DP78,C9JQM    | UPI000013639B  | NM_001349.2               |                 |
| F5GWV2                 | UPI000006DFC5  | NM_016216.3               |                 |
|                        | UPI0000203531  | NM_138353.2               |                 |
|                        | UPI0000203531  | NM_138353.2               |                 |
|                        | UPI0000203531  | NM_138353.2               |                 |
| J3QQJ6                 | UPI00001AEDC6  | NM_005215.3               |                 |
|                        | UPI000013DA24  | _001195610.1,NM_016356.4  |                 |
|                        | UPI00002372F1  | NM_001142552.1            |                 |
| 06RBN2,D6RBJ9,D6RAR9   | UPI00004EC28E  | NM_001012732.1            |                 |
| F5GXJ8                 | UPI000006F88F  | M_030653.3,NM_152438.1    |                 |
| F5GXJ8                 | UPI000006F88F  | M_030653.3,NM_152438.1    |                 |
| Q5T1V5,B7ZBU4,B7ZBU9   | UPI00001AFE4C  | NM_001031725.4            |                 |
|                        | UPI00004589D2  | NM_020946.1               |                 |
| B3KWN5                 | UPI00001C1F29  | _015213.3,NM_00124325     | tolerated(0.58) |
|                        | UPI000020C7D4  | NM_018369.2               |                 |
| B7Z8B7,B7Z3C4          | UPI0000001613  | _001184781.1,NM_005137.2  |                 |
| C9JA18,B7Z3B3          | UPI0000033B9B  |                           |                 |
| Q5SUY4,Q0QD44          | UPI000006EE74  | NM_004753.4               |                 |
|                        | UPI00000467F4  | NM_018180.2               |                 |
| Q6IPP7                 | UPI00000742DC  | NM_032656.3               |                 |
|                        | UPI00001290D9  | NM_004941.1               |                 |
|                        | UPI00001290D9  | NM_004941.1               |                 |
|                        | UPI00001290D9  | NM_004941.1               |                 |
| J7,Q6UUU0,E5RJ79,B4C   | UPI0000EA87E6  | NM_005219.4               |                 |
| Q96IB4                 | UPI0000406CA1  | NM_173602.2               |                 |
| PS35,E9PIL0,E9PI27,E9P | UPI000162779D  | NM_001143688.1            |                 |
| C4P0C8                 | UPI0000458AE1  | NM_001012959.1            |                 |
| C4P0C8                 | UPI0001A61692  | NM_001164539.1            |                 |
|                        | UPI0000051057  | NM_014420.2               |                 |
| F8W750,E9PQT9          | UPI0000E59399  | NM_001142699.1            |                 |
| Q59FY1                 | UPI000013C60C  | NM_021120.3               |                 |
|                        | UPI0000470041  | NM_004747.3               |                 |
| Q5T3U0                 | UPI0000051E36  | NM_206539.1               |                 |

VEP annotated somatic variants

|                        |               |                                  |                 |
|------------------------|---------------|----------------------------------|-----------------|
| R4GMQ0                 | UPI00002020EB | NM_033317.4                      |                 |
| J3KPX5                 | UPI00001D80EF |                                  |                 |
| Q75KM7,O95705,O4335:   | UPI000041AC4D |                                  |                 |
| O15436                 | UPI00017AA3A8 | NM_178504.4                      |                 |
| C9JU64                 | UPI000192C36D | NM_001373.1                      |                 |
| C9JU64                 | UPI000192C36D | NM_001373.1                      |                 |
| C9JU64                 | UPI000192C36D | NM_001373.1                      |                 |
| C9JU64                 | UPI000192C36D | NM_001373.1                      |                 |
| C9JU64                 | UPI000192C36D | NM_001373.1                      |                 |
|                        | UPI0001A5EE11 |                                  |                 |
|                        | UPI00003677EB |                                  |                 |
| Q92865                 | UPI0000141BA2 | NM_001372.3                      |                 |
|                        | UPI00001D6A0B | NM_003462.3                      |                 |
| Q66K39                 | UPI000006DA43 | NM_021233.2                      |                 |
| B4E0Q3                 | UPI000013D6C9 | NM_015221.2                      |                 |
| Q5XG91,B3KXW9          | UPI00001A38CC | NM_004946.2                      |                 |
|                        | UPI000007412C | NM_004947.4                      |                 |
|                        | UPI000002A839 | NM_032482.2                      |                 |
| H3BQS5,H3BP43          | UPI000006DF95 | NM_004413.3                      | tolerated(0.23) |
| K7EJD5,C9JGC1,C9IZH8   | UPI00018131F2 | NM_001135155.1                   |                 |
| Q96DC6,B3KWP1          | UPI000003B000 | 395.1,NM_001077394.1,NM_015958.2 |                 |
| F5H4G6,F5H1L7,B4E191   | UPI000006EC0C | NM_173812.4                      |                 |
|                        | UPI000013E16C | NM_198545.3                      |                 |
|                        | UPI000013D388 | NM_001939.2                      |                 |
|                        | UPI000013D388 | NM_001939.2                      |                 |
|                        | UPI000013D388 | NM_001939.2                      |                 |
|                        | UPI00000726E2 | NM_020693.2                      |                 |
|                        | UPI000013CF4B | NM_001944.2                      |                 |
|                        | UPI000035DB4E | NM_001134453.1                   |                 |
|                        | UPI000035DB4E | NM_001134453.1                   |                 |
| G1UI31,B4DKX6          | UPI000013C67F | NM_004415.2                      |                 |
| Q86T18                 | UPI00001C1577 | NM_015548.4                      |                 |
|                        | UPI000006F286 | NM_080664.2                      |                 |
| D6RAR7                 | UPI000006F968 | 367.1,NM_001271668.1,NM_032122.4 |                 |
|                        | UPI00000738F2 | NM_173666.2                      |                 |
| JY61,C9JVC8,C9JS11,C9J | UPI00001413A2 | NM_020892.2                      |                 |
| F8VX42                 | UPI0000037B0A | NM_152511.3                      |                 |
| F8VZA4                 | UPI000013ED2F | NM_001946.2                      | tolerated(0.1)  |
| Q75MI9,Q75LS9,A4D1I7   | UPI0000129A01 | NM_004411.4                      |                 |
|                        | UPI0000481AC7 |                                  |                 |
| Q6IB29,H7C2Q8          | UPI0000204E6D | NM_001159936.1                   |                 |
| C9JJ78,C9J719          | UPI000000DB82 | NM_006579.2                      | tolerated(0.67) |
| E9PN99,E9PJG1          | UPI0000129B5E | NM_001397.2                      | tolerated(0.15) |
|                        | UPI000013E997 | NM_004826.2                      |                 |
| ISJ9,Q96J05,C9JTI2,C9J | UPI00003DFD0A | NM_001258315.1                   |                 |
| B7ZBI6                 | UPI0000E86804 |                                  |                 |
| Q7L2Y5,H0Y498          | UPI0000470A2B | NM_025191.3                      |                 |
| Q6FH53                 | UPI000012A217 | _001955.4,NM_001168319.1         |                 |
|                        | UPI0000046D5C | NM_001201397.1                   |                 |
|                        | UPI000013C754 | NM_003566.3                      |                 |
|                        | UPI0000000136 | NM_001958.3                      |                 |
|                        | UPI000012ED5C | NM_004280.4                      |                 |
| E5RI18,E5RFW6          | UPI00001AFEA2 | NM_152347.4                      |                 |
| E5RJB7,E5RHB1          | UPI0001929531 | NM_001144933.1                   |                 |
|                        | UPI00017A8807 | NM_001144958.1                   |                 |

VEP annotated somatic variants

|                       |               |                                  |                          |
|-----------------------|---------------|----------------------------------|--------------------------|
|                       | UPI0000209A4C | NM_144715.3                      |                          |
| H0YNW8                | UPI00001FEA35 | NM_024580.5                      |                          |
| K7EIV5,K7EIT3,B3KX19  | UPI0000137931 | 305.1,NM_004247.3,NM_001258354.1 |                          |
|                       | UPI0000163BD6 | NM_001415.3                      |                          |
| B1AL80                | UPI0000072B32 | NM_001421.3                      |                          |
|                       | UPI000004E87D | NM_052906.3                      |                          |
|                       | UPI000004E87D | NM_052906.3                      |                          |
|                       | UPI000004E87D | NM_052906.3                      |                          |
| Q9UMK5                | UPI0000D4A0DC | 3,NM_001081755.2,NM_001278915.1  |                          |
|                       | UPI0000051C66 | NM_017770.3                      |                          |
|                       | UPI0000070A23 | 427.1,NM_001271428.1,N           | tolerated(0.32)          |
|                       | UPI000013927E | NM_014673.3                      |                          |
|                       | UPI000013927E | NM_014673.3                      |                          |
| G3V4U5,F8W717         | UPI00004A074E | NM_001008707.1                   | tolerated(0.82)          |
| G3V4U5,F8W717         | UPI00004A074E | NM_001008707.1                   |                          |
| G3V4U5,F8W717         | UPI00004A074E | NM_001008707.1                   |                          |
|                       | UPI000013E21D | NM_001426.3                      |                          |
| Q71V36,F5GX88         | UPI0000129E00 | 3,NM_001114753.2,NM_001278138.1  |                          |
|                       | UPI0000071D6F | _017993.3,NM_001242863.1         |                          |
|                       | UPI0000EE3B3A | NM_001164178.1                   |                          |
| G3V450                | UPI0000052B69 | NM_001249.2                      |                          |
|                       | UPI00004566BC | NM_015409.4                      |                          |
|                       | UPI00006635A8 | _004445.4,NM_001280794.1         |                          |
| R4SBI6,B1AQP9,B1AQP8  | UPI000012CFF2 | NM_000120.3                      | tolerated(1)             |
| E5RI53                | UPI0000073FE5 | NM_001979.5                      |                          |
|                       | UPI0000201263 | NM_001433.3                      |                          |
| H3BRX7                | UPI00003668C3 | NM_012291.4                      |                          |
|                       | UPI0000251E45 | NM_031913.3                      | tolerated(0.4)           |
| H0YL83                | UPI0000001BC8 | NM_000126.3                      | deleterious(0)           |
|                       | UPI00001A8223 | NM_001014763.1                   | terious_low_confidence(C |
| B2RCZ7                | UPI0000073C7C | NM_014297.3                      |                          |
|                       | UPI0000470AFE | NM_005665.4                      |                          |
|                       | UPI00019145BF | NM_001159944.1                   |                          |
|                       | UPI00019145BF | NM_001159944.1                   |                          |
| K7EQ87                | UPI000013E730 | NM_001988.2                      |                          |
| K7EQ87                | UPI000013E730 | NM_001988.2                      |                          |
| C9JLF4                | UPI0000577ED7 | NM_001193361.1                   |                          |
| Q5T399                | UPI000013DDA8 | NM_130398.3                      | tolerated(0.68)          |
|                       | UPI000013574F | NM_001024924.1                   |                          |
| B7Z9R6                | UPI0000167BA1 | NM_001111077.1                   |                          |
| Q2VF45,Q003V9,Q003V!  | UPI000012A416 | NM_000132.3                      | tolerated(1)             |
| Q2VF45,Q003V9,Q003V!  | UPI000012A416 | NM_000132.3                      |                          |
| Q19UK5,Q19UK4,Q19UK   | UPI000002BA13 | NM_000133.3                      | deleterious(0.05)        |
| B2C6G4                | UPI000004CC6F | NM_174912.3                      |                          |
| Q22,E5RGZ5,E5RGD8,B3I | UPI000003405E | NM_004265.3                      |                          |
| E9PQC2,E9PPZ4         | UPI000003405F | NM_021727.3                      |                          |
| Q53XA7,H0YLC7         | UPI000012A422 |                                  |                          |
| B4DY02,B0QY28         | UPI000022B897 | NM_001104595.1                   | tolerated(0.18)          |
|                       | UPI0000227E33 | NM_001170779.1                   |                          |
|                       | UPI0000227E33 | NM_001170779.1                   |                          |
|                       | UPI00001613F2 | NM_001078173.1                   |                          |
|                       | UPI00001613F2 | NM_001078173.1                   |                          |
| J3QSR3                | UPI000057A0DB | NM_015912.3                      |                          |
|                       | UPI00000373BF | NM_001085480.2                   |                          |
|                       | UPI00000EB9DB | NM_015159.1                      |                          |

VEP annotated somatic variants

|                      |               |                           |                   |
|----------------------|---------------|---------------------------|-------------------|
|                      | UPI000015FCC7 | NM_175885.3               |                   |
|                      | UPI000020BD7C | NM_015688.1               |                   |
|                      | UPI00001D7978 | NM_001145475.1            |                   |
|                      | UPI0000049306 | NM_152481.1               |                   |
|                      | UPI00000710DE | NM_006589.2               |                   |
|                      | UPI0000551BE9 |                           |                   |
|                      | UPI0001AE7915 | NM_001163258.1            |                   |
| H3BP45               | UPI0000EE554D | NM_014722.2               |                   |
|                      | UPI000045731A | NM_152548.2               | tolerated(0.57)   |
| H3BT53               | UPI0000520A1A | NM_000135.2               |                   |
|                      | UPI000000DB76 | NM_021922.2               |                   |
|                      | UPI000000DB76 | NM_021922.2               |                   |
|                      | UPI000000DB76 | NM_021922.2               |                   |
| F8VV73,F8VPF2        | UPI0000041260 | NM_001271783.1            |                   |
| C9JWM9,C9JVQ5        | UPI0000073D5B | NM_014808.2               |                   |
| C9JWM9,C9JVQ5        | UPI0000073D5B | NM_014808.2               |                   |
|                      | UPI000013EB82 | NM_004104.4               |                   |
|                      | UPI000013EB82 | NM_004104.4               |                   |
|                      | UPI000013EB82 | NM_004104.4               |                   |
|                      | UPI000013EB82 | NM_004104.4               |                   |
| Q9Y3V7,C9JQS6        | UPI000042B0C1 | NM_001004019.1            | deleterious(0.03) |
|                      | UPI000013D88F |                           | tolerated(0.16)   |
|                      | UPI00018830C3 | NM_001142641.1            |                   |
| Q08AL4,F5GXN9        | UPI00001C1EC6 | NM_012166.2               |                   |
| Q08AL4,F5GXN9        | UPI00001C1EC6 | NM_012166.2               |                   |
|                      | UPI000012ADC1 | NM_024907.6               |                   |
| C9JK86               | UPI00004123F1 | NM_207102.2               |                   |
|                      | UPI000012A581 | NM_022039.3               |                   |
|                      | UPI0000EE5E27 | NM_001170631.1            |                   |
| 0,M0QZE1,M0QYT8,M0C  | UPI000059D6B0 | NM_001161357.1            |                   |
| :7EWF4,D6RJD4,D6RG0  | UPI000012A72D | M_213647.1,NM_002011      | tolerated(0.2)    |
| C9JU00,C9JPQ9        | UPI000012A78D | NM_021870.2               |                   |
|                      | UPI0000251DB7 | NM_025135.2               |                   |
|                      | UPI0000251DB7 | NM_025135.2               |                   |
|                      | UPI0000251DB7 | NM_025135.2               |                   |
|                      | UPI000022BD13 | NM_018086.2               |                   |
|                      | UPI0000035FBF | NM_030917.3               |                   |
|                      | UPI000000165F | NM_003602.4               |                   |
|                      | UPI000002A9BC | _001135212.1,NM_181342.2  |                   |
| :61,Q86TQ3,Q6NXF2,Q6 | UPI000013C596 | NM_001110556.1            | deleterious(0.01) |
|                      | UPI0001765F91 | NM_001164317.1            |                   |
| D6RFF2               | UPI00001488E7 | NM_182925.4               |                   |
| Q96L17,B4DN09        | UPI00015FA087 | NM_020066.4               |                   |
| Q96L17,B4DN09        | UPI00015FA087 | NM_020066.4               |                   |
|                      | UPI000016A103 | NM_001002294.2            |                   |
|                      | UPI0000DBEF37 | NM_015308.2               |                   |
|                      | UPI0000DBEF37 | NM_015308.2               |                   |
|                      | UPI0000579B80 | NM_032532.2               |                   |
|                      | UPI0000579B80 | NM_032532.2               |                   |
|                      | UPI000012ADD6 | NM_001452.1               |                   |
| Q8N4A5,Q69YN9        | UPI000007462D | 01012426.1,NM_001012427.1 |                   |
|                      | UPI000012AB4D | NM_004957.4               |                   |
| Q69YV4,Q4W596        | UPI000021D4C2 | NM_025074.6               |                   |
| Q69YV4,Q4W596        | UPI000021D4C2 | NM_025074.6               |                   |



VEP annotated somatic variants

|                       |               |                          |                                |
|-----------------------|---------------|--------------------------|--------------------------------|
| Q69YV4,Q4W596         | UPI000021D4C2 | NM_025074.6              |                                |
| Q69YV4,Q4W596         | UPI000021D4C2 | NM_025074.6              |                                |
| Q69YV4,Q4W596         | UPI000021D4C2 | NM_025074.6              |                                |
|                       | UPI0000D615C2 | NM_001168235.1           |                                |
| F8WAN4                | UPI0000366665 | NM_018027.3              |                                |
|                       | UPI000006F96D | NM_152597.4              |                                |
| 4W5Q0,Q4W5K3,Q4W5F    | UPI000020B66B | _001128427.2,NM_020116.4 |                                |
|                       | UPI00001C1EAA | NM_003934.1              |                                |
| I68,Q5U805,E3UTT6,A7X | UPI00000338F8 | NM_000148.3              |                                |
| ,E9PP56,E9PJB4,E9PJ18 | UPI000012ADAC | NM_000150.2              |                                |
|                       | UPI00001262A8 | NM_001680.4              |                                |
| C9J2W6                | UPI000013E307 | NM_024513.3              |                                |
|                       | UPI000022BF90 | NM_207359.2              |                                |
| 359HA5,D6RF16,D6RC24  | UPI000012B04A | NM_005255.2              |                                |
| 359HA5,D6RF16,D6RC24  | UPI000012B04A | NM_005255.2              |                                |
|                       | UPI00001FD982 | _000153.3,NM_001201401.1 |                                |
|                       | UPI00001FD982 | _000153.3,NM_001201401.1 |                                |
| Q71UH7,C8CHJ6         | UPI000012B056 |                          |                                |
| Q4G0E1,D3DQI7         | UPI0000041292 | NM_198321.3              |                                |
|                       | UPI0000073A6F | NM_001253826.1           | tolerated(0.52)                |
| Q68VJ3                | UPI0000070DEC | NM_017417.1              | tolerated_low_confidence(0.07) |
| Q68VJ3                | UPI0000070DEC | NM_017417.1              | tolerated(0.07)                |
|                       | UPI00005A72DA |                          |                                |
|                       | UPI00005A72DA |                          | tolerated(0.15)                |
|                       | UPI00005A72DA |                          |                                |
| B4DH81                | UPI0000EE56F2 | NM_032293.4              |                                |
| E7ETN8                | UPI000004B6D7 | _001134486.2,NM_052942.3 |                                |
| E7ETN8                | UPI000004B6D7 | _001134486.2,NM_052942.3 |                                |
| E7ETN8                | UPI000004B6D7 | _001134486.2,NM_052942.3 |                                |
| I3L1L8                | UPI000004EDF9 | NM_000160.3              |                                |
| Q8N7N7,Q08M29         | UPI000006E705 |                          |                                |
| 35SZC3,B4DIP8,B3KUM8  | UPI000015828B |                          |                                |
| H0UIB3,B7Z4H3         | UPI0000038D5C | _024034.4,NM_001256737.1 |                                |
|                       | UPI000012B394 | NM_016204.1              |                                |
|                       | UPI000012B3B7 | NM_003616.2              |                                |
| E5KND5,C9JA25         | UPI000006232D | NM_024996.5              |                                |
|                       | UPI0000000DD6 | NM_000821.5              |                                |
| K7ENT5,K7EJI6         | UPI0000073CAB | NM_152657.3              | tolerated_low_confidence(0.18) |
| K7ENT5,K7EJI6         | UPI0000073CAB | NM_152657.3              | tolerated_low_confidence(0.18) |
| K7EQ41,K7EL54         | UPI000006E533 |                          |                                |
|                       | UPI0000049E0C | NM_138785.3              |                                |
|                       | UPI00001393F9 | NM_021067.3              | tolerated(0.82)                |
| Q6ZMF1,H3BQT1         | UPI00001FFBD9 | NM_012201.5              |                                |
| Q6ZMF1,H3BQT1         | UPI00001FFBD9 | NM_012201.5              |                                |
| B3KTH4                | UPI000013D29C |                          |                                |
|                       | UPI0000169DF9 | NM_006708.2              |                                |
|                       | UPI000188140C | NM_001024452.2           | tolerated(0.4)                 |
|                       | UPI000188140C | NM_001024452.2           |                                |
| F8VZP2                | UPI000004B633 | NM_031302.3              |                                |
|                       | UPI000003FFB7 | NM_145016.3              |                                |
| Q53SE7                | UPI00000704BE | NM_178439.3              |                                |
|                       | UPI0000001249 | NM_002073.2              |                                |
|                       | UPI00000474FA | NM_053004.2              | tolerated(0.54)                |
|                       | UPI000004EEC8 | NM_000406.2              |                                |
|                       | UPI0000190979 | NM_005895.3              |                                |

VEP annotated somatic variants

|                        |                |                       |                            |
|------------------------|----------------|-----------------------|----------------------------|
| E7ES66,E5FY30,E0D854   | UPI0001CB792B  | NM_000173.5           |                            |
|                        | UPI0000032F5B  | NM_005708.3           |                            |
|                        | UPI000013C91C  | NM_001503.3           |                            |
| C9JZE8,C9J8H8,B7Z613   | UPI00000721CA  | NM_001001995.1        |                            |
| Q53RZ9,B4DQM4          | UPI00017A77BC  |                       |                            |
|                        | UPI000003BCCD  | NM_054021.1           | tolerated(0.06)            |
|                        | UPI0000366736  |                       | tolerated_low_confidence(' |
|                        | UPI00003D41AD  | NM_001083909.1        |                            |
|                        | UPI00003D41AD  | NM_001083909.1        |                            |
|                        | UPI00003D41AD  | NM_001083909.1        |                            |
| H9NIL9                 | UPI0000041346  | NM_007223.2           |                            |
|                        | UPI000005C3025 | NM_020716.1           |                            |
| C9J7B8,A8KA99          | UPI00001AF15F  | NM_017577.4           |                            |
|                        | UPI0000161A59  |                       |                            |
|                        | UPI0000161A59  |                       |                            |
|                        | UPI0000161A59  |                       |                            |
|                        | UPI0000163937  | NM_014668.3           |                            |
|                        | UPI0001E8F433  | NM_001258021.1        |                            |
| EK8,D6RDX5,D6RBV7,D6   | UPI000002AA8D  | NM_000826.3           |                            |
| Q9UHA9                 | UPI000013D503  | NM_000828.4           |                            |
| C9JU97                 | UPI000004A7E3  | NM_000844.3           |                            |
| C9JLW9                 | UPI0000185F04  | NM_014615.3           |                            |
| Q5T0I0                 | UPI000012B3B4  | _000177.4,NM_00125802 | deleterious(0.04)          |
|                        | UPI0000073899  | NM_018094.4           |                            |
| C7DJS1,B2C310          | UPI000011028B  | NM_000852.3           |                            |
| G3V5U6,G3V5G8          | UPI000013C6F0  | NM_145870.2           |                            |
| 3R7,D2CFK9,B7Z7A3,B4I  | UPI000000D960  | NM_012341.2           |                            |
| 3R7,D2CFK9,B7Z7A3,B4I  | UPI000000D960  | NM_012341.2           |                            |
|                        | UPI000013C740  | NM_001522.2           |                            |
| C9J3Q6                 | UPI00001D7E8F  | NM_001080393.1        |                            |
| 32PH61,Q2PH60,Q2PH5I   | UPI000012CE8E  | NM_002108.3           |                            |
| B6EU04                 | UPI00000389A3  | NM_021175.2           |                            |
| IS90,C9JN14,C9JH46,C9J | UPI00001D9A86  | NM_015401.3           |                            |
| IS90,C9JN14,C9JH46,C9J | UPI00001D9A86  | NM_015401.3           |                            |
| N14,Q75N10,C9JLX1,C9   | UPI000019AB75  | NM_178425.2           |                            |
| H0UI53,H0UI52          | UPI0000070B81  | NM_016063.2           |                            |
|                        | UPI0001818C59  | NM_001135565.1        |                            |
| Q6P664                 | UPI000013D4D4  | NM_018072.5           |                            |
| Q6P664                 | UPI000013D4D4  | NM_018072.5           |                            |
| Q6P664                 | UPI000013D4D4  | NM_018072.5           |                            |
|                        | UPI0000D61BE2  | NM_017802.3           | deleterious(0.02)          |
| G3V4V5                 | UPI0000E8AC98  | NM_015382.2           |                            |
| G3V4V5                 | UPI0000E8AC98  | NM_015382.2           |                            |
| B1ALG6                 | UPI000006F63A  | NM_018063.3           |                            |
| B1ALG6                 | UPI000006F63A  | NM_018063.3           |                            |
|                        | UPI000012C594  | NM_016173.3           |                            |
| H0YL74,H0YL07,H0YKW7   | UPI0000212760  | NM_003922.3           |                            |
| 63,I1VA60,I1VA56,I1VA5 | UPI0000001700  | M_000410.3,NM_139006  | tolerated(0.74)            |
| C9JS80,C9JDP4          | UPI000000D92B  | NM_000601.4           |                            |
| C9JL39,C9JHL0,C9JEF1   | UPI000012DC51  | NM_020707.3           |                            |
| F1T0G3                 | UPI000022988D  | NM_001127258.1        |                            |
|                        | UPI0000073F44  | NM_016438.3           |                            |
|                        | UPI000004F5CC  | NM_005340.6           |                            |
| B2R4S9                 | UPI0000000C24  | NM_003522.3           |                            |
|                        | UPI00000003C7  | NM_003530.4           |                            |

VEP annotated somatic variants

|                       |               |                          |                          |
|-----------------------|---------------|--------------------------|--------------------------|
| Q6B823,B2R4R0         | UPI000000003C | NM_003544.2              |                          |
|                       | UPI00003666D2 | NM_025130.3              |                          |
| 7AP3,Q67AP1,Q49U72,Q  | UPI000004494C | NM_002121.5              | deleterious(0.03)        |
| C9JD75,C9JQC9         | UPI0000126A8C | NM_001242784.1           |                          |
|                       | UPI0000161FA7 | M_003071.3,NM_139048.2   |                          |
| r91,Q0G847,F5GY90,B5L | UPI000012C47A | NM_000190.3              |                          |
| Q7Z641,B0QXZ9,B0QXZ8  | UPI00003765B4 | NM_001003681.2           |                          |
| Q7Z641,B0QXZ9,B0QXZ8  | UPI00003765B4 | NM_001003681.2           | terious_low_confidence(C |
| IJ2,E0YMJ1,B8YNW1,B8  | UPI000013CF6C |                          |                          |
| IK8,M0QZV6,M0QYZ0,M0  | UPI000013D3F4 | NM_007040.3              |                          |
| <7ENU5,K7EMR5,K7EJ48  | UPI00003D0BC0 | NM_013312.2              |                          |
| M0R244,B2ZDQ2         | UPI000003FE67 | NM_182983.2              |                          |
|                       | UPI000000D7EB | NM_024747.5              |                          |
|                       | UPI000012CCD5 |                          |                          |
| Q86UN1,Q75LH0,A4D2N2  | UPI000004477E | NM_024012.3              |                          |
| Q5H963                | UPI00004A0DAC |                          |                          |
| Q5H963                | UPI00004A0DAC |                          |                          |
| B7Z1W8,A0N0L8         | UPI0000049DCB | NM_001283052.1           | tolerated(0.11)          |
| B7Z1W8,A0N0L8         | UPI0000049DCB | NM_001283052.1           |                          |
| B7Z1W8,A0N0L8         | UPI0000049DCB | NM_001283052.1           |                          |
| H0YLL5,B4DSZ6,B4DFL2  | UPI000012D1C3 | NM_002168.2              |                          |
| ,H0YLI6,H0YKD0,B7Z9J8 | UPI000012D1AC | NM_005530.2              |                          |
| /E6,H3BR88,H3BR65,H3I | UPI00001412C9 | NM_005531.2              | tolerated(1)             |
| C9JCU0                | UPI000012D69B |                          | tolerated(0.36)          |
| H0YNR0,H0YMJ5         | UPI000012D3EA | NM_000875.3              |                          |
| A0N9R7,A0N9R6         | UPI0000072478 | NM_000876.2              |                          |
| A0N9R7,A0N9R6         | UPI0000072478 | NM_000876.2              |                          |
| A0N9R7,A0N9R6         | UPI0000072478 | NM_000876.2              |                          |
|                       | UPI000058F1A8 | NM_001101372.1           |                          |
|                       | UPI0000E0C769 | _001555.4,NM_001170961.1 |                          |
|                       | UPI0000E0C769 | _001555.4,NM_001170961.1 |                          |
|                       | UPI0000E0C769 | _001555.4,NM_001170961.1 |                          |
| C9JAD3,C9IZX3         | UPI000013D9B3 | NM_001015887.1           |                          |
| C9JAD3,C9IZX3         | UPI000013D9B3 | NM_001015887.1           | tolerated(0.61)          |
| C9JAD3,C9IZX3         | UPI000013D9B3 | NM_001015887.1           |                          |
|                       | UPI0001D3B05B | NM_173588.3              |                          |
| G5EA26                | UPI0002C439DB | NM_001277285.1           |                          |
| 38,F5H2T0,B3KNB2,B3K  | UPI000013D2D0 | NM_003640.3              |                          |
|                       | UPI000013E2E3 | NM_153461.3              |                          |
| F5H675                | UPI000006FA41 | NM_014432.3              | deleterious(0)           |
|                       | UPI0000071143 | NM_021258.3              |                          |
|                       | UPI000012D4A3 | NM_000417.2              |                          |
|                       | UPI000000DC3E | NM_173618.1              |                          |
| I3WAC9,F6MZK5         | UPI00000017EA | NM_001185098.1           |                          |
|                       | UPI00001F9AED | NM_001042376.2           |                          |
| ,Q2PJC1,Q2MKP2,B4DT   | UPI000020324D | NM_000208.2              |                          |
| ,Q2PJC1,Q2MKP2,B4DT   | UPI000020324D | NM_000208.2              |                          |
|                       | UPI0000D7211C | NM_001080453.2           |                          |
|                       | UPI0000D7211C | NM_001080453.2           |                          |
| 0V7,C9JVX2,C9J885,C9J | UPI0000030C84 | NM_012141.2              |                          |
| E7EWC2,D6R939         | UPI000020CB2C | _006633.2,NM_001285460.1 |                          |
| F2Z2E2                | UPI000046FFDD | NM_178229.4              |                          |
|                       | UPI0000DBEEF0 |                          |                          |
| J14,C9JYP7,C9JB67,C9J | UPI000013CC7D |                          |                          |
| J7NNX4                | UPI000011DFC0 | NM_019612.3              |                          |

VEP annotated somatic variants

|                       |               |                                           |                               |
|-----------------------|---------------|-------------------------------------------|-------------------------------|
|                       | UPI000013D8D1 | NM_003637.3                               |                               |
|                       | UPI000013D8D1 | NM_003637.3                               |                               |
| Q8IUA2,E7EP60         | UPI000052D444 | NM_000885.4                               |                               |
|                       | UPI00001AE8BB | NM_002207.2                               |                               |
|                       | UPI000013D6C3 | NM_002218.4                               |                               |
|                       | UPI000013D6C3 | NM_002218.4                               |                               |
|                       | UPI000013D6C3 | NM_002218.4                               |                               |
|                       | UPI000000D98A | NM_004867.4                               |                               |
|                       | UPI000013D92B | NM_002221.3                               |                               |
| I1VE21                | UPI00001FB7D2 | NM_002223.2                               |                               |
| I1VE21                | UPI00001FB7D2 | NM_002223.2                               |                               |
| A6H8K3                | UPI000013CB74 |                                           |                               |
|                       | UPI0000074521 | NM_033397.3                               |                               |
| Q6PAW2,C9JXS9,C9J1A4  | UPI00001403C6 | NM_003024.2                               |                               |
| Q6PAW2,C9JXS9,C9J1A4  | UPI00001403C6 | NM_003024.2                               |                               |
| Q6RFK0,D6RCS1,D6RC0   | UPI000020B45B | 1,NM_001287440.1,NM_001287439.1,NM_001287 |                               |
| F2Z3N8,F2Z2B6         | UPI0000073DE6 | NM_014735.3                               |                               |
|                       | UPI000157482F | NM_001105521.2                            |                               |
| Q96PA1                | UPI0000161C67 | NM_004973.3                               |                               |
| Q96PA1                | UPI0000161C67 | NM_004973.3                               |                               |
| Q96PA1                | UPI0000161C67 | NM_004973.3                               |                               |
|                       | UPI0000167818 | NM_003772.3                               |                               |
| Q8WUM7,Q53U93         | UPI00001AF26E | NM_001256876.1                            |                               |
| B1ALP6,B1ALP5         | UPI000022AE73 | NM_181712.4                               |                               |
| B1ALP6,B1ALP5         | UPI000022AE73 | NM_181712.4                               |                               |
| B1ALP6,B1ALP5         | UPI000022AE73 | NM_181712.4                               |                               |
| B7ZBC9,B7ZBC8         | UPI0000071D68 | NM_007044.3                               |                               |
|                       | UPI000004F638 | NM_031886.2                               | tolerated(0.72)               |
| B7Z435                | UPI000012E169 | NM_172160.2                               |                               |
|                       | UPI0000F079EF | NM_001031836.2                            |                               |
| Q68,F5GY15,F5GWK6,B3I | UPI000004DAE1 | NM_031954.3                               |                               |
|                       | UPI000013F484 | NM_198404.2                               |                               |
| F5H275                | UPI000020C6A8 | NM_016604.3                               |                               |
| B4DGH3                | UPI000013D35A | NM_014663.2                               |                               |
| K7ES23                | UPI00001C202B | NM_015015.2                               |                               |
|                       | UPI0000135A93 | NM_004653.4                               |                               |
| Q68D33,Q59HG3,Q590H4  | UPI000013DA92 | NM_021140.2                               | tolerated_low_confidence(0.1) |
|                       | UPI000045761B | NM_030647.1                               |                               |
|                       | UPI000045761B | NM_030647.1                               |                               |
|                       | UPI000045761B | NM_030647.1                               | tolerated(0.74)               |
| B0QY18                | UPI00001C0A16 | NM_015264.1                               |                               |
| B3KN93                | UPI0000DD87B4 |                                           |                               |
| C5NM88,B5MDV5         | UPI000150AF4A | NM_020340.4                               | tolerated(1)                  |
|                       | UPI00001BBB23 | NM_015496.4                               |                               |
| U3KQN7,U3KQG6         | UPI000194EC26 | NM_001145304.1                            |                               |
|                       | UPI000013EF89 | NM_153369.2                               |                               |
|                       | UPI000012DDA3 | NM_014875.2                               |                               |
|                       | UPI0000185F1A |                                           |                               |
|                       | UPI0000F0A553 | NM_153209.3                               |                               |
| G1UI30,C9JBH1         | UPI0002065B81 | NM_001244008.1                            |                               |
| I3L1B1                | UPI0000001C26 | NM_006612.5                               |                               |
|                       | UPI00001F9377 | NM_016195.2                               |                               |
| B7Z7E7                | UPI000006CD6C | NM_014970.3                               |                               |
|                       | UPI00000315C2 | NM_012311.3                               |                               |

VEP annotated somatic variants

|                       |               |                          |                   |
|-----------------------|---------------|--------------------------|-------------------|
|                       | UPI000012DED8 | NM_005655.3              |                   |
| D6RGC3,B4DFZ5         | UPI0000E20649 |                          |                   |
| Q49A95                | UPI00001AE9B8 | NM_020803.3              |                   |
| F5H8E3,F5H207         | UPI000006D8A7 |                          |                   |
| 6N019,Q75MN6,H0YMU    | UPI0000141B9F | NM_170606.2              |                   |
| B4DFN0                | UPI00003529F7 |                          |                   |
| J3KQF2,F5H5V0         | UPI0000047FD6 | NM_014708.4              |                   |
|                       | UPI00004193B5 | NM_001145715.1           |                   |
| J3QRG4,J3QR48,B7ZAV6  | UPI0000001C21 | NM_002265.5              |                   |
|                       | UPI000002AD01 | NM_032045.4              |                   |
|                       | UPI000013D842 | NM_000421.3              |                   |
|                       | UPI000013C883 | NM_002278.3              |                   |
|                       | UPI000012DAFA | NM_003771.4              |                   |
|                       | UPI000036709D | NM_198690.2              |                   |
|                       | UPI00003D4D71 | NM_198697.2              |                   |
|                       | UPI000021C443 | NM_198698.1              |                   |
|                       | UPI000012E77E | NM_031488.4              |                   |
| Q59H37                | UPI00003673E0 | _001079823.1,NM_000426.3 |                   |
| Q59H37                | UPI00003673E0 | _001079823.1,NM_000426.3 |                   |
| 79,E5RHF3,E5RFQ2,E5I  | UPI000013C937 | NM_001105206.2           |                   |
| 79,E5RHF3,E5RFQ2,E5I  | UPI000013C937 | NM_001105206.2           |                   |
| R4GNC7                | UPI000013CFC7 | NM_002293.3              |                   |
| R4GNC7                | UPI000013CFC7 | NM_002293.3              |                   |
| R4GNC7                | UPI000013CFC7 | NM_002293.3              |                   |
|                       | UPI000013D4CA | NM_005562.2              |                   |
|                       | UPI0000073DC2 | NM_004690.3              |                   |
|                       | UPI00001927D1 | NM_178434.2              |                   |
|                       | UPI00000498C5 | NM_178469.3              |                   |
|                       | UPI0000470177 | NM_001013693.2           |                   |
| B4DI45                | UPI000012EB75 | _014319.4,NM_001167614.1 |                   |
|                       | UPI000012E5D5 | NM_001040167.1           |                   |
|                       | UPI0000202BCD | NM_012276.3              |                   |
| Q75MU4                | UPI000013D678 | NM_002314.3              |                   |
|                       | UPI00000497E2 |                          | tolerated(0.55)   |
| F8VVE2                | UPI0000071212 | NM_018113.2              |                   |
| E9PRJ0,E9PLH4         | UPI0001929501 | NM_015842.2              |                   |
|                       | UPI000013C94B | NM_005575.2              |                   |
| E9PQH4                | UPI0000696489 | NM_152271.3              |                   |
|                       | UPI0000211E03 | NM_001031855.1           |                   |
|                       | UPI0000211E03 | NM_001031855.1           |                   |
|                       | UPI000013D224 | NM_005576.2              |                   |
| C9J5C8,C9J4E3,C9J3U9  | UPI000002E034 | _005578.3,NM_001167672.1 |                   |
| 33V2F6,F8W9L6,F8VRE4  | UPI000034ECC4 | NM_006152.3              |                   |
| 373,Q53S26,Q53RL0,Q53 | UPI00001B045B | NM_018557.2              |                   |
| E9PHY1                | UPI0000073246 | NM_002335.2              |                   |
|                       | UPI000006DF62 | NM_001135772.1           | deleterious(0)    |
|                       | UPI000006DF62 | NM_001135772.1           |                   |
|                       | UPI00000354C2 | NM_002337.3              |                   |
|                       | UPI000013E4BC | NM_152329.3              |                   |
|                       | UPI00001F98A9 | NM_001006939.3           | deleterious(0.04) |
|                       | UPI000021002F | NM_033402.4              |                   |
| A8MY60                | UPI0000ED4E82 | NM_001079910.1           |                   |
|                       | UPI0000DBEEC1 | NM_018385.2              | tolerated(0.11)   |
|                       | UPI000006E20E | NM_015578.2              | tolerated(0.38)   |
|                       | UPI000000412A |                          |                   |

VEP annotated somatic variants

|                        |               |                          |                   |
|------------------------|---------------|--------------------------|-------------------|
|                        | UPI000012A14D | _002340.5,NM_001145436.1 |                   |
| G1UI34                 | UPI000049DF6C | NM_015565.2              |                   |
|                        | UPI000019816C |                          |                   |
| A8K8E0                 | UPI0000366E14 | NM_173506.4              |                   |
|                        | UPI000007311C | NM_212551.4              |                   |
| ,Q9BRY6,B1AL13,B1AL1:  | UPI00001BD944 |                          |                   |
| ,Q9BRY6,B1AL13,B1AL1:  | UPI00001BD944 |                          |                   |
| IX80,C9JTA2,C9JKI7,C9J | UPI0000072C4D |                          |                   |
|                        | UPI0000000A29 | NM_002358.3              |                   |
| A8IF97                 | UPI0000035FCB | NM_004988.4              |                   |
| Q6FHH8                 | UPI0000000C51 | NM_001166386.1           |                   |
|                        | UPI000012F055 | NM_002367.3              |                   |
| A0PK03                 | UPI000006F2FD | NM_005462.4              |                   |
|                        | UPI000012F059 | NM_016249.3              |                   |
|                        | UPI000000123B |                          |                   |
|                        | UPI0000237828 | NM_206920.2              |                   |
| Q6ZUZ1                 | UPI00017A6EBC | NM_001177465.2           |                   |
|                        | UPI000013D632 | NM_005907.3              |                   |
| Q49A69                 | UPI000013D193 | NM_002372.2              |                   |
| Q05BN7,B3KQN1          | UPI000004BF05 | NM_015274.1              | tolerated(0.37)   |
|                        | UPI00002036F9 | NM_018174.4              | deleterious(0.02) |
| E7EWI5                 | UPI0000E444D0 | NM_001001671.3           | deleterious(0.02) |
| Q7Z4E6                 | UPI0000074003 | NM_203351.1              |                   |
|                        | UPI00000747ED | NM_007181.4              |                   |
| Q53TW0,E7ETN6          | UPI00000747E2 | _145687.3,NM_001242559.1 |                   |
| C9JPW3,C9J8E1          | UPI0000073D7E | NM_001243926.1           |                   |
|                        | UPI000004A042 | NM_014975.2              |                   |
|                        | UPI000004A042 | NM_014975.2              |                   |
| J3QT34                 | UPI000173A2B0 | NM_001164664.1           |                   |
|                        | UPI000016054E | NM_003833.4              |                   |
| F5GYT8,F2Z3E2,E9PHF7   | UPI000013D646 | NM_020166.3              |                   |
| N0GVG8,B3KWZ4          | UPI000012ED4A |                          |                   |
| D6RHU8,D6RFG6          | UPI0000071D28 | NM_153487.3              |                   |
| M0QXR3                 | UPI000013C4B8 |                          |                   |
| M0QXR3                 | UPI000013C4B8 |                          |                   |
|                        | UPI0000253F1B | NM_001110792.1           |                   |
|                        | UPI00001414B1 | NM_004229.3              |                   |
| IT8,Q5T8T6,E9PGW7,E7   | UPI000013623C |                          |                   |
|                        | UPI00002029A3 | NM_030973.3              |                   |
| B4DUA7,B4DN56,B4DGM    | UPI00001D81AE | NM_017592.1              | tolerated(1)      |
|                        | UPI000020380F |                          |                   |
|                        | UPI0000DACACB | NM_001409.3              |                   |
| J3KRK1                 | UPI0000201B8B | NM_005925.2              |                   |
| .53,Q53QW0,Q07941,E9F  | UPI000013E252 |                          |                   |
| B3KSH0                 | UPI000006CD69 | NM_019852.3              |                   |
| C9JE69,C9J6U8,C9J3F1,  | UPI0000D4CA51 | NM_024770.3              |                   |
|                        | UPI0000DBE357 | NM_021731.2              |                   |
|                        | UPI0000231C88 | NM_198955.1              |                   |
|                        | UPI0000231C88 | NM_198955.1              |                   |
|                        | UPI0000231C88 | NM_198955.1              |                   |
| Q6LDD1,B4DEE8          | UPI00017A6D43 | NM_002412.3              | tolerated(0.48)   |
| C9J922,A8K0E1          | UPI0001823FDE | NM_015241.2              |                   |
| C9J922,A8K0E1          | UPI0001823FDE | NM_015241.2              |                   |
| C9J922,A8K0E1          | UPI0001823FDE | NM_015241.2              |                   |
| C9JZJ7,C9J453          | UPI000012F0E6 | M_033289.1,NM_000381.3   |                   |

VEP annotated somatic variants

|                           |                |                                |                                |
|---------------------------|----------------|--------------------------------|--------------------------------|
| Q9HBM9,Q8NG69             | UPI00001678BB  | 4937.3,NM_015716.4,NM_153827.4 |                                |
| Q9HBM9,Q8NG69             | UPI00001678BB  | 4937.3,NM_015716.4,NM_153827.4 |                                |
| F5H1S8                    | UPI000013938A  | NM_014730.2                    |                                |
|                           | UPI000013D922  | NM_032435.2                    |                                |
|                           | UPI000006F7B3  | NM_005934.3                    |                                |
|                           | UPI000006FDF6  | NM_147191.1                    |                                |
|                           | UPI000020E726  | NM_005515.3                    |                                |
| Q7ESA9,K7EPX7,K7ELS3      | UPI000006E000  | NM_130807.2                    | tolerated(0.38)                |
|                           | UPI000003E75D3 | _001085354.2,NM_024657.4       |                                |
|                           | UPI000003E75D3 | _001085354.2,NM_024657.4       | tolerated(0.22)                |
| Q1I8,H0YMT8,H0YM21,H0YMT2 | UPI00001FE9BB  |                                |                                |
|                           | UPI000003617B  |                                |                                |
| Q9BS79,F5H742,F5H256      | UPI000012F4D3  | NM_005591.3                    |                                |
| C9K0L2,B7ZBM2             | UPI0000198C4E2 | NM_001039464.2                 | tolerated_low_confidence(0.01) |
| C9K0L2,B7ZBM2             | UPI0000198C4E2 | NM_001039464.2                 | tolerated(1)                   |
| C9K0L2,B7ZBM2             | UPI0000198C4E2 | NM_001039464.2                 | deleterious(0.01)              |
| B4DEH0                    | UPI000013DFCA  |                                |                                |
|                           | UPI000007437B  | NM_032477.2                    |                                |
| C9J5Q3                    | UPI0000167F88  | NM_176794.1                    |                                |
| B4DP77                    | UPI0000135254  | NM_018141.3                    |                                |
| H0YI08,E9PRG4             | UPI00001F78343 | _130385.3,NM_001206880.1       |                                |
| Q53RU4,C9J809,B4DL3C      | UPI00000405F6  | NM_000251.2                    |                                |
| D6REA2,D6RDP9             | UPI000012A0D3  | NM_006745.4                    |                                |
| Q96QW8,B1AKQ2,B1AKP       | UPI000012ABD3  | NM_004958.3                    |                                |
|                           | UPI0000036BC4  | NM_000254.2                    |                                |
|                           | UPI0000036BC4  | NM_000254.2                    |                                |
|                           | UPI0000036BC4  | NM_000254.2                    |                                |
|                           | UPI0000036BC4  | NM_000254.2                    |                                |
|                           | UPI000012F826  | NM_000253.2                    |                                |
| F8WE81,B5ME49             | UPI0000065CA24 | NM_024690.2                    |                                |
| F8WE81,B5ME49             | UPI0000065CA24 | NM_024690.2                    |                                |
| C9JCE7                    | UPI00003B927DE |                                |                                |
| C9JCE7                    | UPI00003B927DE |                                |                                |
| Q1I9,Q9HBC6,H0Y2U6,E7I    | UPI000006C10F2 | NM_002457.2                    |                                |
|                           | UPI000012A0C6  | NM_002461.1                    |                                |
|                           | UPI000013C73B  | NM_015419.3                    |                                |
|                           | UPI0000EE5F22  | NM_001145113.2                 |                                |
| B6D426                    | UPI000006EEAA  | NM_000256.3                    |                                |
| Q68D89,Q66K75             | UPI000005B7237 | NM_001040114.1                 |                                |
| H9XFA0                    | UPI0000253B6F  | NM_014981.1                    |                                |
| 5E6,A8CLN2,A8CLL2,A6F     | UPI000014019B  | NM_000257.2                    |                                |
| 5E6,A8CLN2,A8CLL2,A6F     | UPI000014019B  | NM_000257.2                    |                                |
| 5E6,A8CLN2,A8CLL2,A6F     | UPI000014019B  | NM_000257.2                    |                                |
| Q9UMJ0,B1AH99             | UPI000012FB80  | NM_002473.4                    |                                |
| Q05B98,Q05B97,D6R9C2      | UPI000020A0AE  | NM_053025.3                    |                                |
| K7EQV1,G3V4G3             | UPI0000E59E6E  | NM_016239.3                    |                                |
| Q8N903                    | UPI0000207402  | NM_032608.5                    |                                |
| Q157,K7EP95,K7EMZ0,K7E    | UPI0000173AA19 | NM_001163735.1                 |                                |
| Q14779,M0QXU2             | UPI00001678F0  | NM_012335.3                    |                                |
| Q9UES4                    | UPI0000E445E1  | NM_000259.3                    |                                |
| Q4LE74                    | UPI000020367C  | _001130065.1,NM_004145.3       |                                |
|                           | UPI000012FBA4  | NM_002479.5                    |                                |
| A5PKT7                    | UPI00002288CF  | _032578.3,NM_001256267.1       |                                |
|                           | UPI0000D45F7B  | NM_001127392.1                 |                                |
|                           | UPI0000204444  | NM_001085487.2                 |                                |

VEP annotated somatic variants

|                       |               |                                  |                   |
|-----------------------|---------------|----------------------------------|-------------------|
|                       | UPI000004FA2B | NM_024635.3                      |                   |
|                       | UPI0000073EEB |                                  |                   |
|                       | UPI000013F295 | NM_016256.3                      |                   |
|                       | UPI0000046F0E | NM_004851.1                      | tolerated(0.6)    |
| J3QQR6,J3QQJ2         | UPI000007106D | NM_015654.3                      |                   |
| Q4ZG05,H7C007         | UPI00001AEA68 | NM_015909.3                      |                   |
| ,Q3LRJ5,Q3LRI9,Q3LRI6 | UPI0000161BF3 | NM_031858.2                      | tolerated(0.35)   |
| ,Q3LRJ5,Q3LRI9,Q3LRI6 | UPI0000161BF3 | NM_031858.2                      |                   |
| ,Q3LRJ5,Q3LRI9,Q3LRI6 | UPI0000161BF3 | NM_031858.2                      |                   |
| ,Q3LRJ5,Q3LRI9,Q3LRI6 | UPI0000161BF3 | NM_031858.2                      |                   |
| Q4LE67,F5H7X3         | UPI000013CD70 | NM_004386.2                      | tolerated(0.22)   |
| F5GZK7                | UPI000013C8CA | NM_014865.3                      |                   |
| Q96FA6,E9PLE0,E9PL84  | UPI00001C1EFE | NM_015261.2                      |                   |
| E9PHA2,B4E189         | UPI0000163F72 | 711.1,NM_001281710.1,NM_015341.4 |                   |
|                       | UPI000013C634 |                                  |                   |
| Q9NSZ0,C9JAP0,B4DJ2E  | UPI000013D7D5 | NM_006311.3                      |                   |
| Q9HC12,Q9HC11,B7Z9L2  | UPI00001308D2 | NM_004550.4                      |                   |
| H7C2D0,F8WCL5         | UPI0002065BA0 | NM_001164508.1                   |                   |
| H7C2D0,F8WCL5         | UPI0002065BA0 | NM_001164508.1                   |                   |
| H7C2D0,F8WCL5         | UPI0002065BA0 | NM_001164508.1                   |                   |
| C9JEM7,B3KSP0         | UPI00004A2565 |                                  |                   |
|                       | UPI000006E19B | NM_013349.4                      |                   |
|                       | UPI000006E19B | NM_013349.4                      |                   |
| B4DDI0                | UPI000022ABDC | NM_144573.3                      | deleterious(0.03) |
| D6RF93,D6RC45         | UPI0000192724 | _003998.3,NM_001165412.1         |                   |
| M0R119,M0QZX1         | UPI000016A5CD | NM_001077494.2                   |                   |
| C9JZ23,C9J5I7,C9J5G8  | UPI000006FBB1 | NM_031419.3                      |                   |
|                       | UPI0000198CE1 | NM_198586.2                      |                   |
| B4DS58                | UPI0001750345 | NM_020464.1                      |                   |
|                       | UPI000013D4D9 | NM_002508.2                      |                   |
| H7C162,E9PJH9         | UPI0000DBEF14 | M_016350.4,NM_182946.1           |                   |
|                       | UPI000006FFD0 | NM_020448.4                      |                   |
|                       | UPI00001D7EEA | NM_001099287.1                   | tolerated(0.81)   |
| A2RRA7                | UPI00003761B5 | M_133433.3,NM_015384.4           |                   |
| C9JDV8                | UPI00001303FF | _001202502.1,NM_003634.3         |                   |
|                       | UPI000036715D | NM_007184.3                      |                   |
|                       | UPI0000074709 | NM_014360.2                      | tolerated(0.11)   |
|                       | UPI000006FCBB | NM_181303.1                      |                   |
|                       | UPI0000126FAD |                                  |                   |
|                       | UPI00001AEEBD | NM_153447.4                      |                   |
|                       | UPI00001AEEBD | NM_153447.4                      |                   |
|                       | UPI00001AEEBD | NM_153447.4                      |                   |
|                       | UPI00001B6B39 | NM_176820.2                      |                   |
| F5H5K6                | UPI00000723C4 | NM_024078.1                      |                   |
|                       | UPI0000050326 | NM_022917.4                      |                   |
|                       | UPI00001A9472 |                                  |                   |
| Q9BSN3                | UPI000016A81D | NM_006392.3                      |                   |
| H7BY61,E9PIP8         | UPI000019C573 | _014697.2,NM_001164757.1         |                   |
| P37,Q96J98,O14937,E7E | UPI000013E417 | NM_000603.4                      | tolerated(1)      |
| P37,Q96J98,O14937,E7E | UPI000013E417 | NM_000603.4                      |                   |
| H9CXX2                | UPI0000210F68 | NM_017617.3                      |                   |
| H9CXX2                | UPI0000210F68 | NM_017617.3                      |                   |
|                       | UPI000013DF88 | NM_013389.2                      |                   |
| Q5T6D8                | UPI000005048B | NM_022146.4                      | deleterious(0)    |
|                       | UPI0000353D0F | NM_207173.1                      | deleterious(0.01) |



VEP annotated somatic variants

|                      |               |                                            |                          |
|----------------------|---------------|--------------------------------------------|--------------------------|
|                      | UPI000013040F | NM_002523.2                                |                          |
|                      | UPI0000209A6C | _005126.4,NM_001145425.1                   |                          |
| F1DAL4               | UPI00003E7F93 | _005122.4,NM_001077478.2,NM_001077480.2,NM |                          |
| Q658X2,E9PBK4        | UPI00001FD9DB | NM_017970.3                                |                          |
| 1N8,Q96DQ7,Q658U6,D6 | UPI000006F9C6 | NM_022455.4                                |                          |
| G3V1R4               | UPI000020BF2B | NM_017755.5                                |                          |
| E9PAL9               | UPI00017C1445 | NM_001134231.1                             |                          |
| M0R0X2               | UPI000004FD88 | NM_006179.4                                |                          |
| A4D2J8               | UPI000020EEEB | NM_015332.3                                | deleterious(0.02)        |
|                      | UPI000013C768 | NM_012345.2                                |                          |
|                      | UPI0000237454 | NM_001010906.1                             |                          |
| F5GY77               | UPI000012FC0B | NM_020401.2                                |                          |
| H0YDI2,E9PS86        | UPI00001BBB2F | NM_005085.3                                |                          |
| A0PJK4               | UPI000013071D | NM_198887.1                                |                          |
| B4E2D3               | UPI000013079E | NM_007172.3                                |                          |
| Q53H29,E7EUM5        | UPI0000036166 | _001278603.1,NM_017426.3                   |                          |
| Q53H29,E7EUM5        | UPI0000036166 | _001278603.1,NM_017426.3                   |                          |
| I3L245               | UPI0000130894 | NM_002532.4                                |                          |
| I3L245               | UPI0000130894 | NM_002532.4                                |                          |
|                      | UPI00000015F8 | NM_022052.1                                |                          |
|                      | UPI0000F059DC | NM_032946.2                                |                          |
|                      | UPI0000F059DC | NM_032946.2                                |                          |
|                      | UPI0000F059DC | NM_032946.2                                |                          |
|                      | UPI00001B31EB | NM_022463.4                                |                          |
| C9JXC3,C9JNE2        | UPI000007355C |                                            |                          |
|                      | UPI0000E07EA0 | NM_015311.2                                |                          |
|                      | UPI00001AF029 |                                            |                          |
|                      | UPI0000140FD5 | NM_001017989.2                             |                          |
|                      | UPI000004B1E7 | NM_001005276.1                             |                          |
|                      | UPI00001410CA | NM_002550.2                                | deleterious(0)           |
|                      | UPI0000061EB2 | NM_001005274.1                             |                          |
|                      | UPI0000041D58 | NM_001005272.3                             | terious_low_confidence(C |
|                      | UPI000013F8A8 | NM_001004701.2                             |                          |
| A4FU14               | UPI0000041B31 | NM_033179.2                                |                          |
|                      | UPI0000041BDD | NM_001001913.1                             |                          |
|                      | UPI000015F240 | NM_001004731.1                             | tolerated(1)             |
|                      | UPI00001606CE | NM_001005515.1                             |                          |
|                      | UPI00000405D5 | NM_006637.1                                |                          |
|                      | UPI000004B22E | NM_001004745.1                             |                          |
| H0Y7X4               | UPI0000130E96 | NM_144498.2                                |                          |
| J3KRK7,H3BTF9        | UPI000006CF29 |                                            |                          |
| J3KRK7,H3BTF9        | UPI000006CF29 |                                            |                          |
|                      | UPI000004CAC3 | NM_003999.2                                |                          |
| H0YN66               | UPI0000073AA5 | NM_130901.1                                |                          |
| S4R3Q9,J3KNA0,C9JC63 | UPI000013DE11 | NM_005015.3                                |                          |
| C6G7W3               | UPI000002E776 | NM_002565.3                                | tolerated(0.7)           |
| B3KTQ9               | UPI0000000CAA | NM_000918.3                                |                          |
| B1ANR1               | UPI00002057C5 | NM_001135653.1                             | deleterious(0.04)        |
| E9PSG7,E9PSE1,E9PNZ  | UPI0000190973 | NM_018026.3                                |                          |
|                      | UPI0000071A52 | NM_130467.3                                |                          |
| B7Z6Y8               | UPI0000001616 | NM_002579.2                                |                          |
|                      | UPI0000131D49 | NM_148977.2                                |                          |
|                      | UPI0000131D49 | NM_148977.2                                |                          |
|                      | UPI000000DA54 | NM_018216.1                                | deleterious(0.03)        |
| Q53T81,Q53T17,Q2TAI9 | UPI00000704EB | NM_022894.3                                |                          |

VEP annotated somatic variants

|                       |               |                                                  |                          |
|-----------------------|---------------|--------------------------------------------------|--------------------------|
|                       | UPI00000492D2 | NM_152268.3                                      | terious_low_confidence(C |
| J3KNQ4                | UPI0000EE3866 | NM_018222.4                                      |                          |
|                       | UPI000041A256 | NM_001003828.2                                   |                          |
| R9W7C9                | UPI0000071DEC | NM_003466.3                                      |                          |
|                       | UPI0000073D97 | NM_021635.2                                      | erated_low_confidence(0  |
| A2A3E7,A2A3D9         | UPI0000EE048B | 001142765.1,NM_001142764.1,NM_001142763.1        |                          |
|                       | UPI00001FCE90 | NM_203487.2                                      | tolerated(0.12)          |
|                       | UPI0001573469 | NM_033026.5                                      |                          |
| H7BY58,C9J0F2         | UPI0001B7942B |                                                  | tolerated(0.87)          |
|                       | UPI00001AEB88 | NM_006031.5                                      |                          |
|                       | UPI000049DFA7 | NM_177966.5                                      | tolerated(0.06)          |
| 246,Q9UNL9,Q53TB0,Q5  | UPI0000001072 | _001258312.1,NM_005019.4                         |                          |
| F5GXX2,C9JPD5         | UPI000003B340 | NM_002599.4                                      |                          |
|                       | UPI000013C84A | NM_006204.3                                      |                          |
| 26RIG5,D6RG11,D6RDXI  | UPI0000131793 | NM_006206.4                                      |                          |
| E5RJ14,E5RII0         | UPI0000131791 | NM_002609.3                                      |                          |
| E5RJ14,E5RII0         | UPI0000131791 | NM_002609.3                                      |                          |
|                       | UPI000013DB22 | NM_014317.3                                      |                          |
| K7,H3BU11,H3BQS3,H3I  | UPI000004A864 | _015027.2,NM_001285447.1                         |                          |
| K7,H3BU11,H3BQS3,H3I  | UPI000004A864 | _015027.2,NM_001285447.1                         |                          |
| S4R3X4                | UPI0000072FD2 | NM_024895.4                                      |                          |
| H3BUZ5,H3BUE6         | UPI00002378D0 |                                                  | tolerated(0.34)          |
| A6PVP2                | UPI000045889A |                                                  |                          |
| A6PVP2                | UPI000045889A |                                                  |                          |
| A6PVP2                | UPI000045889A |                                                  |                          |
| K7EQ51                | UPI000006F8BF | NM_000285.3                                      | tolerated(0.79)          |
| K7EQ51                | UPI000006F8BF | NM_000285.3                                      |                          |
| 3R6,Q5VSR5,B1APP8,B1  | UPI00000012D2 | NM_002627.4                                      |                          |
| 3R6,Q5VSR5,B1APP8,B1  | UPI00000012D2 | NM_002627.4                                      |                          |
|                       | UPI000035154F | NM_024989.3                                      |                          |
| B7Z7A9,B4DHM5         | UPI00000727EE | NM_000291.3                                      |                          |
| M0R2W8,M0QYW3         | UPI000004EEA6 | NM_052890.3                                      | tolerated(0.18)          |
|                       | UPI000006F12B | NM_052891.1                                      |                          |
|                       | UPI0000211A97 | NM_005392.3                                      |                          |
|                       | UPI000013DA40 | NM_017934.5                                      |                          |
|                       | UPI000013D340 | NM_002637.3                                      |                          |
|                       | UPI0000192101 | NM_015157.3                                      |                          |
|                       | UPI000189A834 |                                                  |                          |
|                       | UPI000019790E | NM_181643.4                                      |                          |
|                       | UPI000012B9D1 | NM_005482.2                                      |                          |
| 3PNO,K7ENC3,K7EMD7,KI | UPI0000070A47 | NM_176787.4                                      |                          |
| C9JLC8                | UPI00001984EA |                                                  | deleterious(0)           |
| L7RT34,J3KT66,J3KRE9  | UPI0000071DB4 | 3.2,NM_001251852.1,NM_001251853.1,NM_001251854.1 |                          |
|                       | UPI0000366FD6 | NM_015040.3                                      |                          |
|                       | UPI00001582C4 | NM_001001852.3                                   |                          |
|                       | UPI00002073D6 | 001255975.1,NM_001008496.3                       |                          |
| K7EPI8,B4DDN5         | UPI000006D00A | 9.3,NM_001032396.2,NM_022368.4                   |                          |
|                       | UPI000013C4C0 | NM_138694.3                                      |                          |
|                       | UPI000013C576 | NM_004572.3                                      |                          |
|                       | UPI000002FED1 | NM_005084.3                                      |                          |
| 26LBF5,E5RHG4,E5RGA   | UPI0000000DD4 | NM_000930.3                                      |                          |
|                       | UPI0000D6117C | NM_153021.4                                      |                          |
| B7ZM61                | UPI00001F93EE |                                                  |                          |
| B7ZM61                | UPI00001F93EE |                                                  |                          |

VEP annotated somatic variants

|                      |               |                               |                          |
|----------------------|---------------|-------------------------------|--------------------------|
| B7ZM61               | UPI00001F93EE |                               |                          |
| B7ZM61               | UPI00001F93EE |                               | tolerated(1)             |
| H3BQV5               | UPI00001411F7 | NM_002661.3                   |                          |
|                      | UPI00006C0134 |                               |                          |
|                      | UPI00006C0134 |                               |                          |
| Q96IE3,E9PQ28        | UPI0000233FCD | NM_201380.2                   |                          |
| Q96IE3,E9PQ28        | UPI0000233FCD | NM_201380.2                   |                          |
| Q96IE3,E9PQ28        | UPI0000233FCD | NM_201380.2                   |                          |
| Q96IE3,E9PQ28        | UPI0000233FCD | NM_201380.2                   |                          |
| Q96IE3,E9PQ28        | UPI0000233FCD | NM_201380.2                   |                          |
| Q96IE3,E9PQ28        | UPI0000233FCD | NM_201380.2                   |                          |
| B3KR92               | UPI000206539E | NM_001265592.1                |                          |
| B3KWD2               | UPI00001C1F64 | NM_020715.2                   |                          |
| B3KWD2               | UPI00001C1F64 | NM_020715.2                   |                          |
| B3KWD2               | UPI00001C1F64 | NM_020715.2                   |                          |
| J3KSM5               | UPI00001416D8 | NM_032129.2                   |                          |
|                      | UPI000015FEF2 |                               |                          |
| I3QR40,C9JWQ3,C9JCL  | UPI0000049814 | NM_020405.4                   |                          |
| Q2TBE4,E2PU09,A6QRH  | UPI000003812D |                               |                          |
| Q8TEZ9               | UPI000013E3A2 | NM_032870.2                   |                          |
| B8XXQ3               | UPI000189560E | NM_001145717.1                | erated_low_confidence(0  |
| U3N901               | UPI000006CED5 | NM_025225.2                   |                          |
|                      | UPI0001AE63FF | NM_001166111.1                |                          |
| F8VUJ3               | UPI0000228FE1 | 01199781.1,NM_001199782.1     |                          |
| E9PIU7               | UPI000002926B | NM_002696.2                   |                          |
| Q05DB8               | UPI0000134605 | NM_006466.2                   |                          |
| Q05DB8               | UPI0000134605 | NM_006466.2                   |                          |
|                      | UPI000013CEB8 | NM_006475.2                   |                          |
| D5K9T1               | UPI000013F18B |                               | tolerated(1)             |
| M1,E9PFJ1,E7EUD1,E7I | UPI0000055911 | NM_015869.4                   | erated_low_confidence(0. |
| M1,E9PFJ1,E7EUD1,E7I | UPI0000055911 | NM_015869.4                   |                          |
|                      | UPI000002A7A2 | 176.2,NM_148175.2,NM_014337.3 |                          |
| A7E2X1               | UPI000013ECF6 | NM_014906.4                   |                          |
| Q96TC9,Q96SE3        | UPI0000000C3C | NM_001122764.1                |                          |
| I3L267               | UPI0000061E1A | NM_001007533.3                |                          |
| Q6IN90,B3KMA9        | UPI000013EC98 | NM_018461.3                   |                          |
|                      | UPI0000124EAC | _001190447.1,NM_002718.4      |                          |
| C9JQA1               | UPI0000073DB7 | NM_005710.2                   |                          |
|                      | UPI000013D572 | NM_018699.2                   |                          |
| Q05CA1,E9PEH0        | UPI0000422A1D | NM_020226.3                   |                          |
|                      | UPI00001314E8 | NM_006406.1                   |                          |
|                      | UPI00001314E8 | NM_006406.1                   |                          |
|                      | UPI00001314E8 | NM_006406.1                   |                          |
|                      | UPI000006E28E | NM_002726.4                   |                          |
| Q56UR8               | UPI0000375435 | M_024870.2,NM_025170.4        |                          |
|                      | UPI000013CF50 | _002728.4,NM_001243245.1      |                          |
| D6RAH5,D6R971        | UPI000013E37F | NM_152683.2                   |                          |
| C9JZU8,C9J9P1,B4DFV1 | UPI000000DA36 | NM_212539.1                   |                          |
| C9JZU8,C9J9P1,B4DFV1 | UPI000000DA36 | NM_212539.1                   |                          |
| Z8,D6RDM0,D6RD31,D6I | UPI0000169EB7 | NM_002744.4                   |                          |
| G3V5T6,G3V5L5,B4DV0C | UPI000006F09F | NM_006109.3                   |                          |
|                      | UPI00017E10D9 | NM_001134316.1                | tolerated(0.19)          |
| B1AHG4,B1AHG3        | UPI00002327F8 | NM_001198721.1                |                          |
| B1AHC4,Q52M44        | UPI000002B27B |                               |                          |
| B4DNP1               | UPI00001FFF6A | _173502.4,NM_001258290.1      |                          |

VEP annotated somatic variants

|                      |               |                                  |                              |
|----------------------|---------------|----------------------------------|------------------------------|
|                      | UPI0001612CC0 | NM_015225.2                      |                              |
|                      | UPI000013CCF5 | NM_031246.3                      |                              |
|                      |               | NM_002783.2                      |                              |
| Q9UMH8,Q15461,Q12810 | UPI00001327A5 | NM_002784.3                      |                              |
|                      | UPI0000132792 | NM_002816.3                      |                              |
|                      | UPI000012990A | _003720.3,NM_001261824.1         |                              |
|                      | UPI0000039F04 | NM_020232.4                      |                              |
|                      | UPI000012E24A | NM_001146108.1                   |                              |
| 31,Q69YS2,Q5VWH6,Q51 | UPI0000132991 | NM_006504.4                      |                              |
| G1UI20               | UPI0000470154 | NM_002840.3                      |                              |
| O60420               | UPI00001AEBFB | NM_002841.3                      |                              |
|                      | UPI0001747A04 | NM_001135648.1                   |                              |
| Q9NSR5               | UPI000002E7C7 | NM_002847.3                      |                              |
|                      | UPI000007334C | NM_001013658.1                   |                              |
| E9PL65               | UPI0000203D8E |                                  |                              |
| E9PL65               | UPI0000203D8E |                                  |                              |
| E9PL65               | UPI0000203D8E |                                  |                              |
| E9PL65               | UPI0000203D8E |                                  |                              |
|                      | UPI00000510D0 | NM_015617.2                      |                              |
| B5MDP1,B3KWN8        | UPI000006CE59 | NM_024854.3                      |                              |
| K7EL58               | UPI000000D857 | NM_032932.3                      |                              |
| Q6PJZ0,F8WAG1        | UPI000006FCEB | NM_022449.3                      | tolerated(0.18)              |
|                      | UPI000003F780 | NM_022337.2                      |                              |
| D6REW8               | UPI0000DA58DE | NM_001032726.2                   |                              |
|                      | UPI00000745A5 | NM_004703.4                      |                              |
| H0YLG7,D3DS70        | UPI000013188E | NM_004581.5                      |                              |
| J3QLK0,J3KSC4        | UPI00000041DA | NM_005052.2                      |                              |
| G3V4W9,C9J5S9        | UPI0000073AB0 | NM_133509.3                      |                              |
| F5H6X3,C9J7G0        | UPI0000E0A787 | NM_018059.4                      |                              |
| L7RRS6               | UPI0000049CFC | NM_002880.3                      |                              |
| B3KMZ9               | UPI00001B296B | NM_001145525.1                   |                              |
| Q5T3T1,Q5T3T0,Q5T3S6 | UPI0000EE7109 | NM_001145658.1                   |                              |
| F8W0N0,F8VXK1,B3KP1! | UPI0000406B36 |                                  |                              |
|                      | UPI0000071D46 | NM_005055.4                      |                              |
| Q1W2K8               | UPI000006FD97 |                                  | tolerated_low_confidence(0.1 |
|                      | UPI0000070DF1 | 468.1,NM_001204467.1,NM_005676.4 |                              |
|                      | UPI00001A95DC | NM_022118.3                      |                              |
|                      | UPI00001D7F03 | NM_018989.1                      |                              |
| E5RJD7,E5RFP4        | UPI000002B229 | NM_001008712.2                   |                              |
|                      | UPI0000133587 | NM_021111.2                      |                              |
|                      | UPI00000012B7 | NM_006509.3                      |                              |
|                      | UPI000020E30A | NM_031922.3                      |                              |
|                      | UPI00000015BE | NM_032579.2                      |                              |
|                      | UPI000013CC65 | NM_021026.2                      |                              |
|                      | UPI000000DA67 | NM_052859.3                      |                              |
|                      | UPI000000DA67 | NM_052859.3                      |                              |
| N3,C9JWQ9,C9JHG2,B4  | UPI00001C1DE7 | NM_015150.1                      |                              |
|                      | UPI0001A5C4AD |                                  |                              |
|                      | UPI000040E182 | NM_002924.4                      |                              |
| F5GZV2               | UPI0002065232 | NM_015653.4                      |                              |
| B7ZAU7               | UPI000002A3C9 | NM_020639.2                      |                              |
| B4DZV7               | UPI000000DC2B | NM_022780.3                      |                              |
| B4DZV7               | UPI000000DC2B | NM_022780.3                      |                              |
|                      | UPI00001343E6 | NM_006397.2                      |                              |
|                      | UPI000005339F | NM_021133.3                      |                              |

VEP annotated somatic variants

|                          |               |                          |                 |
|--------------------------|---------------|--------------------------|-----------------|
|                          | UPI0000133895 |                          |                 |
|                          | UPI0001AE7525 | NM_173662.2              |                 |
|                          | UPI00015D777B | NM_153341.2              |                 |
|                          | UPI00006C175E | NM_001146684.2           |                 |
|                          | UPI00000713D9 | NM_002941.3              |                 |
|                          | UPI00000713D9 | NM_002941.3              |                 |
| Q14DU5,E9PF63            | UPI000034ECB0 | NM_004850.3              | tolerated(0.67) |
|                          | UPI00001AF82C | NM_005012.3              |                 |
|                          | UPI000013D467 | NM_002944.2              |                 |
| H7C1Q1                   | UPI0001610F54 |                          |                 |
| R4GNH7,R4GMS1            | UPI0002B83260 |                          |                 |
|                          | UPI0000035DAB | NM_024604.2              |                 |
| I,I3L308,I3L2X0,I3L2W0,I | UPI000006FBCB | _006987.3,NM_001190411.1 |                 |
| I54,M0R3D6,M0R1A7,B4I    | UPI0000133CD9 | NM_000980.3              |                 |
| K7EMA7                   | UPI0000028D48 | NM_000984.5              |                 |
| K7EMA7                   | UPI0000028D48 | NM_000984.5              |                 |
| I8TBW1,Q49AJ9,G5E9GC     | UPI0000167B7E | _001033853.1,NM_000967.3 |                 |
| Q96IR1,B2R491            | UPI0000000066 | NM_001007.4              |                 |
| I4W7,D6RD75,D6R910,B7    | UPI000020D48C | NM_001006932.1           |                 |
| Q6DKI0                   | UPI000007000F | NM_020761.2              |                 |
| Q6DKI0                   | UPI000007000F | NM_020761.2              |                 |
|                          | UPI0000198EE6 | NM_015056.2              |                 |
|                          | UPI0000198EE6 | NM_015056.2              |                 |
| K7EKD3                   | UPI0000070E2E | NM_018346.1              |                 |
|                          | UPI0000000C72 |                          |                 |
|                          | UPI00004546A2 | NM_001265589.1           | tolerated(0.6)  |
|                          | UPI0000D74C3F | NM_025158.4              |                 |
|                          | UPI0000D74C3F | NM_025158.4              |                 |
|                          | UPI000046FD20 | NM_017987.4              |                 |
| Q26P3U7,F1D8Q5,B3KY83    | UPI0000042A9A | NM_002957.4              |                 |
| O75591,B4DET7            | UPI0000D7E62F |                          |                 |
| O75591,B4DET7            | UPI0000D7E62F |                          |                 |
| O75591,B4DET7            | UPI0000D7E62F |                          |                 |
| O75591,B4DET7            | UPI0000D7E62F |                          |                 |
| L9,D7UNU4,D7UNU3,D7      | UPI0000DD0308 | NM_001035.2              |                 |
| L9,D7UNU4,D7UNU3,D7      | UPI0000DD0308 | NM_001035.2              |                 |
|                          | UPI0000E5B01A | NM_001036.3              |                 |
| U3KPY7                   | UPI000187B6C9 | NM_005870.4              |                 |
| Q5SYV1,B4DPI2            | UPI000006F076 | NM_007101.3              |                 |
|                          | UPI000013559C | NM_016038.2              |                 |
| Q86TK5                   | UPI00001D69ED | NM_002972.2              |                 |
| H0YDZ1                   | UPI00000622D5 | NM_030962.3              |                 |
| M0R3G4,M0R2L3            | UPI0000071891 | NM_021228.2              |                 |
|                          | UPI000013E800 | NM_005698.3              |                 |
|                          | UPI0000135F1C | NM_153334.4              |                 |
|                          | UPI000013CFF1 | NM_144777.2              |                 |
| Q8NBV9,Q75MG0            | UPI000013C4DF | NM_001112706.2           | tolerated(0.13) |
|                          | UPI000013DC5F | NM_144643.2              |                 |
|                          | UPI000013DC5F | NM_144643.2              |                 |
|                          | UPI0000EE1E57 | NM_198081.3              |                 |
| F5H4V8,C9JBM7            | UPI000002A665 | _001081676.1,NM_006922.3 |                 |
| Q53QP0                   | UPI0000140AC7 | NM_002977.3              | tolerated(1)    |

VEP annotated somatic variants

|                                |               |                          |                           |
|--------------------------------|---------------|--------------------------|---------------------------|
| Q53QP0                         | UPI0000140AC7 | NM_002977.3              |                           |
|                                | UPI0000204007 | NM_152608.3              |                           |
|                                | UPI0000DBEEC4 | NM_152744.3              |                           |
| A4UCS7                         | UPI0000072378 | NM_183352.2              |                           |
|                                | UPI0001662AB0 | NM_001193336.2           | deleterious(0.03)         |
|                                | UPI0000203C4D | NM_033127.2              |                           |
| Q5QPE2,B4DS04<br>E9PDM8,D6RGJ5 | UPI0000135455 | 385.4,NM_032986.3,NM_    | deleterious(0.02)         |
|                                | UPI00001AEA4F |                          |                           |
|                                | UPI0000070A8E | NM_015490.3              |                           |
|                                | UPI0000070A8E | NM_015490.3              |                           |
|                                | UPI0000070A8E | NM_015490.3              | tolerated(0.75)           |
|                                | UPI0000070A8E | NM_015490.3              |                           |
| 348,Q7L1Z0,Q6AW84,F8\          | UPI00001AEA0A | _024077.3,NM_001282688.1 |                           |
| J3QRU5,J3KTR4,J3KS4C           | UPI00000359A5 | NM_003004.2              | olerated_low_confidence(' |
|                                | UPI000012E44A | NM_000450.2              |                           |
| Q6ULR6                         | UPI0000204D4A | NM_003005.3              |                           |
| JJ2,Q75MQ2,C9JD25,C9           | UPI0000135A60 | NM_006080.2              |                           |
| JJ2,Q75MQ2,C9JD25,C9           | UPI0000135A60 | NM_006080.2              |                           |
|                                | UPI0000135A69 | NM_004186.3              |                           |
| B1AHR2                         | UPI000067DA91 | NM_145733.2              |                           |
| G3V5I3,G3V3A0                  | UPI000012509B |                          |                           |
| Q53GC0                         | UPI000006F397 | NM_013376.3              |                           |
|                                | UPI00006C12ED | NM_015048.1              |                           |
|                                | UPI00006C12ED | NM_015048.1              |                           |
| C9JLM1,C9JLA7,A8K0G4           | UPI0000411FEE | NM_001080517.1           |                           |
|                                | UPI0000136779 |                          |                           |
| J3QL37,I3L4G7,H3BMB0           | UPI0000167878 | NM_012426.4              |                           |
|                                | UPI0000135473 | NM_031287.2              |                           |
|                                | UPI0000032F1A | NM_003901.3              |                           |
| I3L1Y7                         | UPI0000160300 | NM_014853.2              |                           |
| I3L1Y7                         | UPI0000160300 | NM_014853.2              |                           |
| B9A6J5,B0QY80                  | UPI0000035D8C | NM_015705.4              |                           |
|                                | UPI0000073DAA | NM_001206652.1           |                           |
|                                | UPI000041B175 | NM_014631.2              |                           |
|                                | UPI000013E109 | NM_016148.2              |                           |
|                                | UPI000013E109 | NM_016148.2              |                           |
| D9ZGF9                         | UPI0000135942 | NM_000193.2              |                           |
| F5H3B6,C9IZC6                  | UPI0000125D05 | NM_001649.2              | tolerated(0.41)           |
|                                | UPI0000135992 | NM_053003.2              |                           |
|                                | UPI0000206F2B | NM_173354.3              |                           |
|                                | UPI000013599A | NM_005069.3              |                           |
|                                | UPI00001D7D6A |                          |                           |
|                                | UPI00000389DC | _021181.3,NM_001282595.1 |                           |
|                                | UPI000006E8DB | NM_152679.3              |                           |
|                                | UPI00001977FD | NM_197965.2              | tolerated(0.2)            |
|                                | UPI0000141815 | NM_006598.2              |                           |
| 275MH3,Q75LT0,A4D0X            | UPI0000049F9D | NM_022444.3              |                           |
|                                | UPI000019C3D5 | NM_006517.4              | tolerated(0.29)           |
| 753,M0R1V3,M0R106,M0           | UPI0000129B1A | NM_005071.2              |                           |
| 753,M0R1V3,M0R106,M0           | UPI0000129B1A | NM_005071.2              |                           |
|                                | UPI0000130BB6 | NM_003060.3              |                           |
|                                | UPI000020C6FE | NM_152685.3              |                           |
| G3V505,B4DHR5                  | UPI000044C5DE |                          |                           |
| Q75KX8                         | UPI0000001663 | _014251.2,NM_001160210.1 |                           |
| K7EMW3,K7ELM7                  | UPI00001AE651 | NM_001143780.1           |                           |

VEP annotated somatic variants

|                          |               |                          |                 |
|--------------------------|---------------|--------------------------|-----------------|
| K7EMW3,K7ELM7            | UPI00001AE651 | NM_001143780.1           |                 |
| J7,I3L3K8,I3L2J9,I3L1H1, | UPI000003E7B7 | _001166347.1,NM_173626.3 |                 |
|                          | UPI000013DE67 | NM_004213.3              |                 |
|                          | UPI000013D0D5 | NM_004212.3              |                 |
| Q5VWW5,Q5VVV3            | UPI000003E7A8 | NM_014580.4              |                 |
|                          | UPI00000377B5 | NM_032826.4              |                 |
| B4DJ02,B3KY53            | UPI00001609C1 | NM_001029858.3           |                 |
|                          | UPI000006DD13 | NM_173508.2              |                 |
| E9PRJ4,B7Z480            | UPI000019AB60 | NM_198277.2              |                 |
| 3Z0,H3BPV9,H3BPK8,H3     | UPI000004EC72 |                          |                 |
| E5RJM7                   | UPI0000237468 | NM_001080431.1           |                 |
| VC2,C9J9M9,C9J722,C9     | UPI000013EFE9 | NM_001199692.1           |                 |
| Q9UEU3                   | UPI00001359F6 | NM_000453.2              |                 |
|                          | UPI0000072E3C | NM_007231.3              |                 |
| M0QYK3                   | UPI00001305CE | NM_014037.2              |                 |
| 33VRU5,B3VRU0,B3VRS:     | UPI0000135493 |                          |                 |
| B7Z589                   | UPI000053030B | NM_201649.3              |                 |
| E9PQT4,E9PIC3,B3KSX4     | UPI000012E235 | NM_012244.3              |                 |
| E9PQT4,E9PIC3,B3KSX4     | UPI000012E235 | NM_012244.3              |                 |
|                          | UPI0000071389 | _001257291.1,NM_032591.2 |                 |
| Q4LEJ9                   | UPI000013F0AD | NM_005630.2              |                 |
| F6TQG2                   | UPI0000161FA6 | NM_003069.3              |                 |
| Q4W5H1,Q4W5G3            | UPI000006E693 | NM_003601.3              |                 |
|                          | UPI000042146E | NM_148674.3              |                 |
|                          | UPI0000071CCF |                          |                 |
| C9JP19,C9JGQ0            | UPI00001B0272 | NM_134270.2              |                 |
| I46,B0QZA0,B0QZ99,A8M    | UPI000022AFDA |                          |                 |
|                          | UPI000013D6B7 |                          |                 |
|                          | UPI0000EE6E4F | NM_020777.2              |                 |
| A7LBF9                   | UPI00001601FD | NM_206996.2              |                 |
| A7LBF9                   | UPI00001601FD | NM_206996.2              |                 |
|                          | UPI000049D98C | NM_001009615.1           |                 |
|                          | UPI00001D8243 | NM_198572.2              |                 |
| B9A038                   | UPI000066D99E | NM_005876.4              |                 |
| B9A038                   | UPI000066D99E | NM_005876.4              |                 |
| <7EM91,K7EKC8,K7EJS4     | UPI0000135E8E | NM_021102.3              | tolerated(0.14) |
| B4DFA9                   | UPI0000136F51 | NM_001244950.1           |                 |
|                          | UPI0000E59BE4 | NM_016642.3              |                 |
|                          | UPI0000E59BE4 | NM_016642.3              |                 |
| G1UI29,C9J4U4            | UPI000059D368 | NM_006662.2              |                 |
|                          |               |                          |                 |
| C9JZA7                   | UPI000206527B | NM_001256748.1           |                 |
|                          | UPI0000001C5C |                          |                 |
|                          | UPI000000D98B | NM_006456.2              |                 |
|                          | UPI000000D98B | NM_006456.2              |                 |
| A8K7N4,A6NjX0            | UPI0000001658 | NM_175039.3              |                 |
| H0YIF3                   | UPI00001ADDF4 | NM_017564.9              |                 |
| C9JZ93,C9JK83,C9JEK5     | UPI0000038DA0 | NM_213622.2              |                 |
|                          | UPI0000073E6C | NM_012108.2              |                 |
| B4DMS6                   | UPI0001BE8155 | NM_020759.2              |                 |
| RU2,E9PBE2,C9JM11,C9     | UPI00000015F2 | NM_003151.3              |                 |
| C9J4I3                   | UPI000006F059 | NM_012448.3              |                 |

VEP annotated somatic variants

|                       |                |                                         |                           |
|-----------------------|----------------|-----------------------------------------|---------------------------|
| E5RJN7                | UPI000013D271  | 01164381.1,NM_001164380.1               |                           |
| H3BVF2                | UPI00000377B6  | _001256677.1,NM_001256672.1,NM_004809.4 |                           |
|                       | UPI000015D192  | NM_001271006.1                          |                           |
|                       | UPI00001A36D9  | NM_182489.1                             |                           |
| -10YD00,H0YC91,E9PKQ0 | UPI00000467FD  |                                         |                           |
|                       | UPI0000160E65  | NM_033088.3                             |                           |
| A4D1K4                | UPI00001C1E68  | NM_020704.2                             |                           |
|                       | UPI0000199FE0  | NM_001127715.2                          |                           |
| F5H4G3,F5H366,F5H2I9  | UPI000013C57C  | NM_018423.2                             | tolerated(0.07)           |
|                       | UPI000012F694  | NM_016086.2                             |                           |
|                       | UPI0000072507  | NM_033050.4                             |                           |
|                       | UPI0000135A5D  | NM_006936.2                             |                           |
|                       | UPI0000072D67  | NM_001002255.1                          | tolerated(1)              |
| 2M5,M0R105,B4E0Q4,B4  | UPI000006D81A  |                                         |                           |
| 2M5,M0R105,B4E0Q4,B4  | UPI000006D81A  |                                         |                           |
|                       | UPI0000070B4A  | NM_145006.2                             |                           |
| E9PJM7                | UPI0000073652  | NM_015055.2                             |                           |
| C2,M0R180,M0R039,M0   | UPI00002026C0  | NM_004819.2                             |                           |
|                       |                |                                         |                           |
| 26MZP0,G3V5D3,G3V40:  | UPI00003677E5  | NM_182914.2                             |                           |
| 26MZP0,G3V5D3,G3V40:  | UPI00003677E5  | NM_182914.2                             |                           |
| B4DLC4                | UPI000006E2F8  | _001178088.1,NM_003898.3                |                           |
|                       | UPI00001B03B3  | NM_145728.2                             | tolerated(0.47)           |
|                       | UPI00001D75EB  | _133477.2,NM_00128675                   | tolerated(0.49)           |
|                       | UPI0000073C75  |                                         |                           |
| U3KQR0                | UPI0000073C75  |                                         |                           |
| U3KQR0                | UPI0000073C75  |                                         |                           |
| E7EMT0,C9JA91         | UPI0000136869  | NM_006342.2                             | tolerated(0.35)           |
|                       | UPI0000212176  | NM_024885.3                             |                           |
|                       | UPI0000071CD5  | _054114.4,NM_001278733.1                |                           |
|                       | UPI0000071CD5  | _054114.4,NM_001278733.1                |                           |
|                       | UPI00001FE055  | NM_152334.2                             |                           |
|                       | UPI00001FE055  | NM_152334.2                             |                           |
| H7BZJ2                | UPI000013DEC1  | NM_014760.3                             | tolerated(0.26)           |
| H7BZJ2                | UPI000013DEC1  | NM_014760.3                             |                           |
| B9A6M3,B0QYI3         | UPI0000128722  | _014346.2,NM_00128430                   | tolerated(0.12)           |
|                       | UPI00001AE7B3  | NM_014832.2                             |                           |
| V04,C9JNM0,C9JMP7,C9  | UPI000017E10F6 | NM_001134381.1                          | erated_low_confidence(0.: |
| Y5,D6RDG2,D6RC61,D6   | UPI000013EF70  |                                         |                           |
|                       | UPI000017DA69  | NM_005995.4                             |                           |
|                       | UPI00000709E1  | NM_080390.3                             | tolerated(0.24)           |
|                       | UPI0000181BA17 | NM_003198.2                             | tolerated(0.95)           |
|                       | UPI000013E374  | NM_006706.3                             |                           |
|                       | UPI0000167BDB  |                                         |                           |
|                       | UPI00001642306 | NM_153046.2                             |                           |
| G3CAS6,B7ZMH4         | UPI0000211B6A  | 01163279.1,NM_001163278.1               |                           |
| G8BLJ6,G3CAS7         | UPI00001C48FC2 | NM_001122679.1                          |                           |
|                       | UPI0000137364  |                                         |                           |
| K9JJH7                | UPI0000DD79F5  | _144993.1,NM_001287491.1                |                           |
|                       | UPI0000DAC9CA  |                                         |                           |
| 29NX99,J3QKY0,J3KRY2  | UPI00001AE7BC  | 01288732.1,NM_001288733.1               |                           |
|                       | UPI0000070D41  | NM_152325.1                             |                           |
| E5KTM5                | UPI000003B01A  | NM_016020.3                             |                           |
|                       | UPI0000212570  | NM_016521.2                             | tolerated(0.58)           |
| G5E9B5                | UPI000006CFD4  | NM_013342.3                             |                           |
| E9PAW7                | UPI000049D997  | _001195683.1,NM_003243.4                |                           |



VEP annotated somatic variants

|                       |               |                                  |                   |
|-----------------------|---------------|----------------------------------|-------------------|
|                       | UPI0000074793 |                                  | tolerated(0.25)   |
|                       | UPI0000049F68 | NM_052955.2                      |                   |
| Q6MZL6,Q5RI53         | UPI0000231C7F | NM_003247.2                      |                   |
|                       | UPI000006E5C6 | NM_016585.4                      |                   |
|                       | UPI00006C0B74 | NM_015204.2                      |                   |
| G3V5B9                | UPI000000CC0F |                                  |                   |
| D6W593                | UPI0000D6DA73 | NM_025264.4                      |                   |
| C9JMB5                | UPI000013DE6F | NM_003253.2                      |                   |
| F5H6W6,F5H6R0,F5H1M:  | UPI00004DF8BE |                                  |                   |
|                       | UPI000000D72E | NM_182919.3                      |                   |
| A8K1K8                | UPI0000073827 | NM_014177.2                      |                   |
| B3KPZ8                | UPI0001AE759A | NM_001258028.1                   |                   |
| B3KPZ8                | UPI0001AE759A | NM_001258028.1                   |                   |
| K7ELX5                | UPI000006DF3D | NM_138463.3                      |                   |
| H0YNT2                | UPI000013703A | NM_001282979.1                   |                   |
| H0YNT2                | UPI000013703A | NM_001282979.1                   |                   |
| 373,J3QQN4,J3QLK5,J3P | UPI00001B6B0F | NM_006852.3                      |                   |
| D6RCE0                | UPI0000072EED | NM_012464.4                      | tolerated(0.11)   |
|                       | UPI0000073AEE | NM_012465.3                      |                   |
|                       | UPI0000073AEE | NM_012465.3                      |                   |
|                       | UPI0000073AEE | NM_012465.3                      |                   |
|                       | UPI00001FE5FC |                                  |                   |
|                       | UPI0000137060 | NM_016170.4                      |                   |
|                       | UPI0000039E20 | NM_144676.3                      | tolerated(0.93)   |
| C9J6W0                | UPI00006C0498 | NM_015348.1                      |                   |
|                       | UPI000045760C | NM_018295.4                      | tolerated(0.16)   |
| D6RDW6                | UPI000020B0D7 |                                  |                   |
|                       | UPI0001AE6FF9 | NM_032508.2                      |                   |
| J3QT25                | UPI0001915109 |                                  |                   |
|                       | UPI00001D79BC | NM_001004313.1                   |                   |
|                       | UPI0000457217 |                                  |                   |
| Q5VXQ8,Q5PY18,D3TTZ   | UPI000000D92D | 507.1,NM_001270508.1,NM_006290.3 |                   |
| Q52M88                | UPI0000048FDE | NM_001244.3                      |                   |
| H7C3U5,C9J9K1         | UPI00016632FD | NM_001080495.2                   |                   |
|                       | UPI000013CE0F | NM_032865.5                      |                   |
|                       | UPI000013CE0F | NM_032865.5                      | tolerated(0.9)    |
| B3KVT9                | UPI0000D720ED | 01141980.1,NM_001141             | tolerated(1)      |
| B3KVT9                | UPI0000D720ED | 01141980.1,NM_001141             | tolerated(1)      |
| B3KVT9                | UPI0000D720ED | 01141980.1,NM_001141979.1        |                   |
|                       | UPI0000201C11 | 049.1,NM_015476.3,NM_001271950.1 |                   |
| 7EPV9,K7EMU5,K7ELP(   | UPI000002B5B9 |                                  |                   |
| Q4L233                | UPI0000130FB2 | NM_007030.2                      |                   |
| Q4L233                | UPI0000130FB2 | NM_007030.2                      |                   |
| C9JDW1                | UPI00001C08BF | NM_198485.3                      |                   |
|                       | UPI0000052E20 | NM_024108.2                      |                   |
| G3V4C3,B0AZV9         | UPI000000CC28 | NM_001079537.1                   |                   |
| G3V4C3,B0AZV9         | UPI000000CC28 | NM_001079537.1                   |                   |
|                       | UPI0000052952 | NM_033502.2                      | deleterious(0.04) |
|                       | UPI000006F0D9 |                                  |                   |
| Q5SRL0                | UPI0000137066 | NM_033229.2                      |                   |
| Q9NZT8                | UPI0000000DCE | NM_006510.4                      |                   |
| F5GYK0                | UPI000022B316 | 01282378.1,NM_001256601.1        |                   |
|                       | UPI000004E050 | NM_018207.2                      |                   |
|                       | UPI0000418F23 |                                  | tolerated(1)      |
|                       | UPI000006D630 | NM_015163.5                      |                   |

VEP annotated somatic variants

|                       |                |                                  |                 |
|-----------------------|----------------|----------------------------------|-----------------|
|                       | UPI000006D630  | NM_015163.5                      |                 |
|                       | UPI000034ECE6  | NM_007118.2                      |                 |
| Q71V88                | UPI00000012CD  | NM_003302.2                      | tolerated(0.09) |
| 2Y6,K7EJX9,B4E3A3,B4I | UPI0000000A02  |                                  |                 |
|                       | UPI0000070468  | NM_024917.5                      |                 |
|                       | UPI000004FADD  |                                  |                 |
| H0YKU7                | UPI0001DBB3A9  | NM_001252020.1                   |                 |
|                       | UPI000003B069  | NM_014555.3                      | tolerated(0.06) |
|                       | UPI0000071CBA  | NM_017672.4                      |                 |
| F5H6Q4                | UPI000003BB44  | NM_001177431.1                   |                 |
|                       | UPI000013773E  | 426.1,NM_001162427.1,N           | tolerated(0.48) |
|                       | UPI000013773E  | 426.1,NM_001162427.1,NM_000368.4 |                 |
|                       | UPI000013C781  | NM_000548.3                      |                 |
|                       | UPI0000038C95  | NM_005727.3                      |                 |
| Q7Z2J5,Q7Z2I5,Q7Z2E9  | UPI0000049052  | 3,NM_001278741.1,NM_             | deleterious(0)  |
| A0ZT99                | UPI000013683C  | NM_004615.3                      |                 |
|                       | UPI000004FD58  | NM_053006.4                      |                 |
|                       | UPI000041512B  | NM_032538.1                      |                 |
|                       | UPI000041512B  | NM_032538.1                      |                 |
|                       | UPI00001AEF7A  | NM_145170.3                      |                 |
|                       | UPI0000042226  | _001271420.1,NM_017775.3         |                 |
|                       | UPI00003E58F8  | NM_001145418.1                   | deleterious(0)  |
|                       | UPI0001B79116  | NM_001200049.2                   |                 |
|                       | UPI0001B79116  | NM_001200049.2                   |                 |
|                       | UPI0001B79116  | NM_001200049.2                   |                 |
|                       | UPI0001B79116  | NM_001200049.2                   |                 |
|                       | UPI0001B79116  | NM_001200049.2                   |                 |
|                       | UPI00001377A7  | NM_012263.4                      |                 |
| D3DTW0,C9JMG1         | UPI00017BCE80  | NM_001130918.1                   |                 |
| Q9H4D2                | UPI000013EA27  | NM_003320.4                      |                 |
|                       | UPI000012B2EE  | NM_052903.4                      |                 |
|                       | UPI000013CC55  |                                  |                 |
|                       | UPI000013CD76  | NM_020245.4                      |                 |
|                       | UPI000013CD76  | NM_020245.4                      |                 |
|                       | UPI000006E2264 |                                  |                 |
|                       | UPI000155D5D9  |                                  |                 |
|                       | UPI0000137941  | NM_018961.3                      |                 |
|                       | UPI0000047471  | NM_032873.4                      |                 |
|                       | UPI000020E72A  | NM_014671.2                      |                 |
| Q96HY5                | UPI000021276F  | NM_020765.2                      |                 |
|                       | UPI000013F1FC  | NM_001077619.1                   |                 |
| F5H3N5                | UPI000003021D  | NM_003356.3                      |                 |
|                       | UPI000006E524  | NM_152896.2                      |                 |
| B3KSE5                | UPI0000E8267C  | NM_017886.2                      |                 |
| Q6L9N9                | UPI0000D6254B  | NM_173568.3                      |                 |
| Q6L9N9                | UPI0000D6254B  | NM_173568.3                      | tolerated(1)    |
| Q6L9N9                | UPI0000D6254B  | NM_173568.3                      |                 |
|                       | UPI0000074455  | NM_173167.2                      |                 |
| D6RA68                | UPI0001AE676E  | NM_001193388.3                   |                 |
|                       | UPI0000126B4C  | NM_016327.2                      |                 |
| A4QPH4                | UPI000004B62E  | NM_145052.3                      |                 |
| E9PSD7,A8KAF9         | UPI000034E5B6  | NM_206933.2                      |                 |
| M0R3B1,M0R172         | UPI000006F7A8  | NM_031941.3                      |                 |

VEP annotated somatic variants

|                       |               |                                  |                          |
|-----------------------|---------------|----------------------------------|--------------------------|
| Q6P2I0                | UPI00001379EB | NM_005153.2                      |                          |
| 35JXD3,G5E9A6,B4DGK:  | UPI0000161434 | NM_004651.3                      |                          |
| Q53Y90                | UPI000003772C | NM_017414.3                      |                          |
| Q9UQN9                | UPI000013D050 |                                  |                          |
| 39NSJ7,K7ESK0,K7ERX(  | UPI00001C1FC6 | NM_015276.1                      |                          |
|                       | UPI0000410E09 | NM_014709.3                      |                          |
| D6RF65,B4DU75         | UPI000020CADC | NM_032175.2                      |                          |
|                       | UPI00001FB38B | NM_014503.2                      |                          |
|                       | UPI00001FB38B | NM_014503.2                      |                          |
| I08,Q86UB8,Q590G7,F4M | UPI00001B3DBF | _001258267.1,NM_007125.4         |                          |
|                       | UPI00000012EB | NM_003380.3                      |                          |
| Q71V81                | UPI0000055A9A | NM_003382.4                      | tolerated(0.58)          |
|                       | UPI000013D498 | NM_001288837.1                   |                          |
|                       | UPI0000070723 | NM_006370.2                      |                          |
| C9K060                | UPI0000423E27 | NM_001202560.2                   |                          |
| C9K060                | UPI0000423E27 | NM_001202560.2                   |                          |
|                       | UPI000013E466 | NM_152559.2                      | terious_low_confidence(C |
| Q6PIM1                | UPI000176ADB8 | NM_020945.1                      |                          |
| 34R3Z0,Q9NWV7,Q659C   | UPI0000138ED1 | NM_018117.11                     |                          |
| 34R3Z0,Q9NWV7,Q659C   | UPI0000138ED1 | NM_018117.11                     |                          |
| 34R3Z0,Q9NWV7,Q659C   | UPI0000138ED1 | NM_018117.11                     |                          |
| 34R3Z0,Q9NWV7,Q659C   | UPI0000138ED1 | NM_018117.11                     |                          |
| 34R3Z0,Q9NWV7,Q659C   | UPI0000138ED1 | NM_018117.11                     |                          |
| Q0QD35,E7EP77         | UPI000019C575 |                                  |                          |
| C9JCS7                | UPI0000203FB7 | _001115113.2,NM_025160.6         |                          |
| C9JH61,C9JEE7,C9IZK7  | UPI00001C1DCD | NM_015131.1                      |                          |
| F8W7Y5,C9JC24         | UPI000006FF8C | NM_020839.2                      |                          |
| H7C1E8,A4D230         | UPI000020E761 | NM_018051.4                      |                          |
| B4DXE9                | UPI0001662BC1 | NM_031951.3                      |                          |
|                       | UPI000006F2DE | NM_014149.3                      |                          |
|                       | UPI0000073E34 | 299.1,NM_001033518.1,NM_015610.3 |                          |
| Q96CZ6                | UPI000013CD65 | NM_018979.3                      | tolerated(0.16)          |
| Q5TEH9,Q5TEH8         | UPI0000138F23 | NM_024494.2                      |                          |
|                       | UPI000013D6C5 | NM_003393.3                      | tolerated(0.39)          |
|                       | UPI000004A506 | NM_020135.2                      |                          |
| B4DPV6,B4DFS1         | UPI0000031565 | NM_018639.4                      |                          |
|                       | UPI00017A7149 |                                  |                          |
| 33BRX8,H3BPJ8,B4DHF(  | UPI000006CD16 | _001270454.1,NM_007014.4         |                          |
| Q68CN2,F5H315         | UPI0000001BDE | NM_020196.2                      |                          |
| Q9NW55                | UPI000006F5DC | NM_018053.2                      |                          |
| Q5T6H7,Q5T6H2,B4E2P.  | UPI00003D2EAD |                                  |                          |
| B7ZBB4                | UPI00000401E0 | NM_022098.3                      |                          |
| E2QRM3                | UPI000006CC97 | NM_020750.2                      |                          |
| M4WFF9                | UPI000013D351 |                                  |                          |
| M4WFF9                | UPI000013D351 |                                  |                          |
|                       | UPI000006E761 | NM_015982.3                      |                          |
| A3KFK2,A3KFK1         | UPI0001AE792F | NM_001198903.1                   |                          |
| A3KFK2,A3KFK1         | UPI0001AE792F | NM_001198903.1                   |                          |
| Q658W5                | UPI00000728EE | NM_020861.1                      |                          |
| B7ZW40                | UPI000020E358 | NM_001013623.2                   |                          |
|                       | UPI00002377F7 |                                  |                          |
|                       | UPI00002377F7 |                                  |                          |
|                       | UPI00002377F7 |                                  |                          |
|                       | UPI0000160D96 | NM_015117.2                      |                          |
|                       | UPI000002B2AD | NM_017590.5                      |                          |

VEP annotated somatic variants

|                       |               |                |                   |
|-----------------------|---------------|----------------|-------------------|
| B4DNL2,B1AMU5         | UPI0000072244 | NM_001143978.2 |                   |
|                       | UPI0000073C8D | NM_198046.1    | tolerated(0.35)   |
|                       | UPI00000373E8 | NM_022494.1    |                   |
| H3BNQ9,H3BMI0         | UPI000013EA61 | NM_001145548.1 |                   |
|                       | UPI000013FDD5 | NM_182491.2    |                   |
| G3V3N5,C9JSX6         | UPI000198D01B | NM_033400.2    |                   |
| PQ0,F5H542,E7ET52,E5I | UPI000057A0B4 | NM_012082.3    |                   |
| H3BUW6                | UPI0000E5924A | NM_001077268.1 |                   |
| Q75MV2,J7M2L3,J7M2K9  | UPI000013C3AC | NM_014569.3    |                   |
| C9JUQ8                | UPI0000126A0E | NM_015896.2    |                   |
| C9JUQ8                | UPI0000126A0E | NM_015896.2    |                   |
| H7BZT5,B3KPM4         | UPI0001D27F7E | NM_001178106.1 |                   |
| A6NFS0                | UPI000059DBB5 | NM_001080485.3 |                   |
| M0QZ59                | UPI000013CAB8 | NM_020657.2    | tolerated(0.46)   |
| F5H1K2                | UPI000013C359 |                |                   |
| C9J1G1                | UPI00002323B9 | NM_199451.2    |                   |
|                       | UPI000059D659 | NM_001146175.1 |                   |
| ◊7ERS3,K7EQC9,K7ELF6  | UPI000007049F | NM_144689.3    |                   |
| ◊0R258,M0R0H8,M0R0E:  | UPI0000139CDC |                |                   |
| J3KQM6                | UPI000059D677 | NM_152355.2    |                   |
| Q7Z3P1                | UPI000013F1DE | NM_152695.5    |                   |
|                       | UPI000022ABBF | NM_001076678.2 |                   |
|                       | UPI000013A290 |                |                   |
|                       | UPI000013E5FC |                | tolerated(0.38)   |
| H3BQQ2                | UPI0001AE67A3 |                |                   |
| M0QYG4                | UPI0000202ADA | NM_025040.3    | tolerated(0.68)   |
| M0QY39,I0CMK8         | UPI000035E843 | NM_001076675.2 |                   |
|                       | UPI00002376EC | NM_001001411.2 | tolerated(0.42)   |
| Q8N508                | UPI0000DD78D7 | NM_001080470.1 |                   |
| M0R1G3,M0QYN4         | UPI000041F9DE | NM_021269.2    | tolerated(0.45)   |
| KB3,C9JVC3,C9JSV9,C9  | UPI000176161D | NM_001128223.1 |                   |
|                       | UPI000022DD3A | NM_007131.3    |                   |
|                       | UPI0000074535 | NM_152458.6    | deleterious(0.01) |
| I3L0H5                | UPI0000251D78 | NM_001031665.2 |                   |
| H0YKY1,B3KWS2         | UPI0001596890 |                |                   |
|                       | UPI0000351AA0 | NM_207341.2    | tolerated(0.09)   |
| 6Y9,F5H789,F5H2D8,F5H | UPI000021D4BC | NM_181877.3    |                   |
| Q9HA55                | UPI00001C2005 | NM_023072.2    |                   |
|                       | UPI00004569F7 | NM_015113.3    |                   |

VEP annotated somatic variants

| PolyPhen                 | EXON          | INTRON | DOMAINS                                      |
|--------------------------|---------------|--------|----------------------------------------------|
|                          |               | 2/4    |                                              |
|                          |               | 5/5    |                                              |
|                          |               | 5/22   |                                              |
|                          | 9/40<br>33/33 |        | lices:TMhelix,hmmpanther:PTHR19229:SF120,hmr |
|                          |               | 3/38   |                                              |
|                          |               | 20/38  |                                              |
|                          |               | 13/38  |                                              |
|                          | 28/31         |        | :PTHR24223,Gene3D:3.40.50.300,TIGRFAM_dom    |
|                          |               | 14/30  |                                              |
|                          | 31/39<br>1/9  |        | 'ROSITE_profiles:PS50929,hmmpanther:PTHR242  |
|                          |               | 21/22  |                                              |
| possibly_damaging(0.691) | 1/1           |        | Low_complexity_(Seg):seq                     |
|                          |               | 9/10   |                                              |
|                          |               | 1/11   |                                              |
|                          |               | 10/10  |                                              |
|                          |               | 7/7    |                                              |
|                          | 1/6           |        |                                              |
|                          |               | 6/10   |                                              |
|                          |               | 3/5    |                                              |
|                          |               | 8/13   |                                              |
|                          |               | 3/10   |                                              |
|                          |               | 1/12   |                                              |
|                          |               | 6/10   |                                              |
| possibly_damaging(0.839) | 20/23         |        | panther:PTHR11905,hmmpanther:PTHR11905:SF    |
|                          |               | 10/18  |                                              |
| probably_damaging(0.934) | 19/22         |        | ofiles:PS50092,hmmpanther:PTHR13723,hmmpan   |
|                          |               | 15/21  |                                              |
|                          |               | 4/38   |                                              |
|                          |               | 5/8    |                                              |
|                          |               | 9/24   |                                              |
|                          |               | 16/28  |                                              |
|                          |               | 2/2    |                                              |
|                          | 7/19          |        | 4,hmmpanther:PTHR14338,Gene3D:2.30.29.30,Pf  |
|                          |               | 16/20  |                                              |
|                          |               | 8/20   |                                              |
|                          |               | 3/17   |                                              |
|                          |               | 2/16   |                                              |
|                          | 4/4           |        | 1,PROSITE_profiles:PS50262,hmmpanther:PTHR2  |
|                          |               | 17/26  |                                              |
|                          |               | 1/2    |                                              |
|                          | 1/6           |        | lices:TMhelix,Pfam_domain:PF04750,hmmpanther |
|                          |               | 12/18  |                                              |
|                          |               | 11/18  |                                              |
| benign(0.05)             | 3/6           |        | hmmpanther:PTHR11242,hmmpanther:P            |
|                          | 5/14          |        | nmpanther:PTHR24102:SF15,Pfam_domain:PF013   |
|                          |               | 7/13   |                                              |
|                          |               | 30/49  |                                              |
|                          |               | 14/49  |                                              |
|                          |               | 9/9    |                                              |
|                          |               | 8/14   |                                              |

VEP annotated somatic variants

|                          |       |       |                                             |
|--------------------------|-------|-------|---------------------------------------------|
|                          |       | 3/16  |                                             |
|                          |       | 11/12 |                                             |
|                          |       | 10/13 |                                             |
|                          | 1/14  |       |                                             |
|                          |       | 9/13  |                                             |
|                          |       | 7/9   |                                             |
|                          |       | 6/9   |                                             |
|                          | 35/48 |       | hmmpanther:PTHR12827                        |
|                          |       | 4/42  |                                             |
|                          |       | 14/22 |                                             |
|                          |       | 2/7   |                                             |
|                          |       | 12/12 |                                             |
| possibly_damaging(0.494) | 16/16 |       | hmmpanther:PTHR24147:SF22,hmmpant           |
|                          |       | 21/33 |                                             |
|                          |       | 18/27 |                                             |
|                          | 10/14 |       | hmmpanther:PTHR24161,hmmpanther:P           |
|                          |       | 5/27  |                                             |
|                          |       | 6/11  |                                             |
|                          |       | 22/34 |                                             |
|                          | 1/1   |       |                                             |
|                          |       | 12/22 |                                             |
|                          |       | 11/23 |                                             |
|                          |       | 6/20  |                                             |
| probably_damaging(1)     | 9/21  |       | :PTHR22780,Gene3D:1.25.10.10,Pfam_domain:PF |
|                          |       | 2/14  |                                             |
|                          |       | 5/8   |                                             |
| probably_damaging(0.968) | 1/4   |       | RSF017529,Prints_domain:PR02025,hmmpanther: |
|                          | 1/4   |       |                                             |
|                          |       | 2/4   |                                             |
| benign(0.288)            | 12/20 |       | hmmpanther:PTHR11533:SF31,hmmpant           |
|                          |       | 2/4   |                                             |
| benign(0.015)            | 21/23 |       | hmmpanther:PTHR12552,hmmpanther:P           |
|                          |       | 3/46  |                                             |
|                          |       | 8/11  |                                             |
|                          | 16/23 |       | ofiles:PS50238,hmmpanther:PTHR14166,hmmpan  |
|                          |       | 15/40 |                                             |
|                          |       | 3/14  |                                             |
| benign(0.086)            | 11/13 |       | IR22825:SF12,hmmpanther:PTHR22825,Gene3D:2  |
|                          | 6/20  |       | Gene3D:2.30.30.40,hmmpanther:PTHR22826:SF94 |
|                          |       | 4/6   |                                             |
|                          | 6/6   |       | ,hmmpanther:PTHR11711,hmmpanther:PTHR117    |
|                          |       | 11/22 |                                             |
|                          | 1/2   |       |                                             |
| benign(0)                | 2/2   |       | hmmpanther:PTHR15712:SF21,hmmpant           |
|                          |       | 2/2   |                                             |
|                          |       | 10/14 | hmmpanther:PTHR15712:SF21,hmmpant           |
|                          |       | 2/7   |                                             |
|                          |       | 1/7   |                                             |
| possibly_damaging(0.886) | 3/8   |       | main:PF00884,hmmpanther:PTHR10342,hmmpant   |
|                          |       | 8/19  |                                             |
|                          |       | 1/5   |                                             |
|                          |       | 6/10  |                                             |
|                          |       | 1/4   |                                             |

VEP annotated somatic variants

1/6

1/8  
12/16  
5/8  
6/8  
15/21  
7/11  
11/12  
2/10  
5/13

30/30

11/29

16/23

omain:PF00122,hmmpanther:PTHR24093,hmmpar  
mpanther:PTHR24093:SF229,Superfamily\_domai  
20/21  
11/26  
9/9  
13/22  
1/27  
13/27  
24/27  
9/12  
16/23  
6/6  
6/7

benign(0)

16/26

hmmpanther:PTHR23052

10/10

benign(0.003)

3/3

hmmpanther:PTHR11214,hmmpanther:P  
5/14  
15/33

benign(0.003)

3/3

ain:PF00118,hmmpanther:PTHR11353,hmmpanth  
1/9

1/5  
11/11  
4/8  
8/9  
4/16

benign(0.004)

1/2

hmmpanther:PTHR11848,hmmpanther:P  
1/4  
14/15  
19/27  
18/23  
17/23  
14/23  
8/27  
13/15

9/42

?,PROSITE\_profiles:PS50294,hmmpanther:PTHR1

10/10  
1/8  
4/8  
15/15

possibly\_damaging(0.736)

11/16

hmmpanther:PTHR23231,hmmpanther:P  
3/8  
1/1

11/11

rofiles:PS50188,hmmpanther:PTHR24100,hmmpa  
24/31

VEP annotated somatic variants

|                          |       |       |                                                  |
|--------------------------|-------|-------|--------------------------------------------------|
|                          | 3/3   |       |                                                  |
|                          |       | 3/8   |                                                  |
|                          |       | 8/8   |                                                  |
| benign(0.002)            | 2/5   |       | hmmpanther:PTHR13481                             |
|                          |       | 10/67 |                                                  |
|                          | 2/2   |       | Pfam_domain:PF15047                              |
|                          |       | 8/15  |                                                  |
|                          | 10/10 |       |                                                  |
| benign(0.089)            | 9/9   |       |                                                  |
|                          | 1/4   |       |                                                  |
| benign(0.003)            | 2/2   |       | hmmpanther:PTHR23033, hmmpanther:P               |
|                          | 11/22 |       | Pfam_domain:PF15020                              |
|                          |       | 5/7   |                                                  |
|                          |       | 8/19  |                                                  |
|                          |       | 8/14  |                                                  |
|                          |       | 4/4   |                                                  |
|                          | 5/5   |       |                                                  |
|                          |       | 1/3   |                                                  |
|                          |       | 19/40 |                                                  |
|                          |       | 3/10  |                                                  |
|                          |       | 26/40 |                                                  |
|                          |       | 30/40 |                                                  |
|                          | 1/6   |       |                                                  |
|                          |       | 6/17  |                                                  |
|                          |       | 7/8   |                                                  |
| probably_damaging(0.972) | 6/7   |       | ofiles:PS51144, hmmpanther:PTHR18952, hmmpan     |
|                          | 17/37 |       | hmmpanther:PTHR15502, hmmpanther:P               |
|                          |       | 40/46 |                                                  |
|                          |       | 15/46 |                                                  |
|                          |       | 19/48 |                                                  |
|                          |       | 11/38 |                                                  |
|                          |       | 38/38 |                                                  |
|                          |       | 3/13  |                                                  |
|                          |       | 13/13 |                                                  |
|                          |       | 8/14  |                                                  |
|                          | 1/9   |       |                                                  |
|                          | 11/11 |       |                                                  |
|                          |       | 7/18  |                                                  |
|                          |       | 4/10  |                                                  |
|                          | 8/19  |       | 1971, hmmpanther:PTHR21595, hmmpanther:PTHR      |
|                          |       | 11/22 |                                                  |
|                          |       | 2/19  |                                                  |
|                          |       | 3/4   |                                                  |
|                          |       | 8/20  |                                                  |
|                          |       | 6/10  |                                                  |
|                          | 7/7   |       |                                                  |
|                          |       | 2/10  |                                                  |
|                          |       | 18/20 |                                                  |
|                          |       | 11/28 |                                                  |
|                          | 1/2   |       | hm_domain:PF01146, hmmpanther:PTHR10844, hm      |
|                          | 7/9   |       | ad-coils_(Ncoils):Coil, hmmpanther:PTHR13140, hm |
|                          |       | 7/9   |                                                  |
| probably_damaging(0.959) | 3/7   |       | Pfam_domain:PF03148                              |



VEP annotated somatic variants

| Variant       | Count | Annotations                                      |
|---------------|-------|--------------------------------------------------|
|               | 4/7   |                                                  |
|               | 11/11 |                                                  |
|               | 28/28 |                                                  |
| benign(0.033) | 4/18  | led-coils_(Ncoils):Coil,hmmpanther:PTHR32083,hrr |
|               | 13/24 | ed-coils_(Ncoils):Coil,hmmpanther:PTHR13140:SF:  |
|               |       | 6/15                                             |
|               |       | 23/28                                            |
|               | 3/15  | iled-coils_(Ncoils):Coil,hmmpanther:PTHR23161,hr |
|               |       | 1/8                                              |
|               |       | 3/14                                             |
|               |       | 1/3                                              |
|               |       | 2/2                                              |
| benign(0.014) | 21/33 | hmmpanther:PTHR11412,hmmpanther:P                |
|               | 4/6   | i,PROSITE_profiles:PS50835,hmmpanther:PTHR2:     |
|               |       | 7/8                                              |
|               |       | 6/6                                              |
| benign(0)     | 3/3   | _complexity_(Seg):seg,hmmpanther:PTHR15484:§     |
|               |       | 5/12                                             |
|               | 3/4   | 5343,hmmpanther:PTHR15343:SF0,Low_complexit      |
|               |       | 16/36                                            |
|               |       | 19/19                                            |
| benign(0.002) | 6/9   | hmmpanther:PTHR14477,hmmpanther:P                |
|               |       | 5/14                                             |
|               |       | 11/12                                            |
|               |       | 1/6                                              |
|               |       | 7/11                                             |
|               | 12/16 | RFAM_domain:TIGR00089,Gene3D:2qgqB01,TIGR        |
|               |       | 21/21                                            |
|               |       | 1/12                                             |
|               |       | 1/1                                              |
|               | 1/2   |                                                  |
|               |       | 1/6                                              |
|               |       | 2/6                                              |
|               |       | 7/9                                              |
|               |       | 11/17                                            |
| benign(0.006) | 7/18  | hmmpanther:PTHR22880,hmmpanther:PT               |
|               |       | 7/7                                              |
|               | 1/1   | _complexity_(Seg):seg,hmmpanther:PTHR22146,r     |
|               |       | 5/20                                             |
| benign(0.007) | 1/3   | Gene3D:1.10.20.10,Pfam_domain:PF15510,Superf     |
|               |       | 11/34                                            |
|               |       | 24/34                                            |
|               |       | 1/14                                             |
|               |       | 3/14                                             |
| benign(0.001) | 6/18  | hmmpanther:PTHR14594:SF1,hmmpantl                |
|               |       | 6/19                                             |
|               |       | 8/12                                             |
|               |       | 9/11                                             |
| benign(0)     | 9/22  | files:PS50923,hmmpanther:PTHR19325,hmmpantl      |
|               | 27/27 | TIGRFAM_domain:TIGR012                           |
|               | 3/5   |                                                  |
|               | 1/23  |                                                  |
|               |       | 4/17                                             |

VEP annotated somatic variants

| Annotation              | Count                               | Details                                                                                                                                                                                                   |
|-------------------------|-------------------------------------|-----------------------------------------------------------------------------------------------------------------------------------------------------------------------------------------------------------|
| possibly_damaging(0.87) | 8/13<br>11/11<br>1/1                | 5/17<br>,hmmpanther:PTHR11177,hmmpanther:PTHR1117                                                                                                                                                         |
| benign(0.001)           | 5/5<br>5/5<br>6/6<br>1/6<br>6/6     | 13/19<br>Prints_domain:PR02040,hmmpanther<br>45/47<br>am_domain:PF04487,hmmpanther:PTHR17045,hrr<br>10/10<br>14/22<br>12/19                                                                               |
|                         | 34/49<br>2/2                        | 3/5<br>4/24<br>12/15<br>17/21<br>7/10<br>hmmpanther:PTHR13162:SF8,hmmpantl<br>4/6<br>panther:PTHR22750,hmmpanther:PTHR22750:SF1<br>13/23<br>20/23<br>19/23<br>36/43                                       |
| benign(0.036)           | 12/13<br>14/14<br>4/6               | am_domain:PF02205,hmmpanther:PTHR21557,hrr<br>11/18<br>10/21<br>47/55<br>11/28<br>22/59<br>18/59<br>27/44<br>56/66<br>20/34<br>5/43<br>panther:PTHR10509:SF2,Pfam_domain:PF01596,<br>2/3<br>12/18<br>2/11 |
| benign(0.001)           | 10/10<br>18/20<br>8/8<br>1/4<br>3/5 | Low_complexity_(Seg):seg,Transmembran<br>6/12<br>4/12<br>2/16<br>3/16<br>Pfam_domain:PF08562,hmmpanther:PTHR10334,h<br>12/14<br>8/14<br>8/18<br>9/13                                                      |

VEP annotated somatic variants

|                          |       |                                               |
|--------------------------|-------|-----------------------------------------------|
|                          | 4/10  | hmmpanther:PTHR15036,hmmpanther:P             |
|                          |       | 1/11                                          |
|                          | 31/50 | Low_complexity_(Seg):seg                      |
|                          |       | 3/17                                          |
|                          | 3/19  | omain:PF01044,hmmpanther:PTHR18914,hmmpai     |
|                          | 15/67 | omain:PF00431,PROSITE_profiles:PS01180,SMAI   |
|                          |       | 1/20                                          |
| possibly_damaging(0.713) | 24/26 | Pfam_domain:PF00888,hmmpanther:PTHR22771:     |
|                          |       | 1/23                                          |
| unknown(0)               | 18/24 | THR14043:SF4,hmmpanther:PTHR14043,Gene3D:     |
|                          |       | 18/19                                         |
|                          | 20/20 |                                               |
| benign(0)                | 8/18  | hmmpanther:PTHR12072:SF5,hmmpantl             |
|                          | 2/2   |                                               |
|                          |       | 7/7                                           |
|                          |       | 3/8                                           |
|                          |       | 8/8                                           |
|                          |       | 7/8                                           |
|                          |       | 8/12                                          |
| benign(0.021)            | 2/13  | hmmpanther:PTHR24290,hmmpanther:P             |
|                          |       | 2/9                                           |
|                          | 2/20  | nther:PTHR21493,hmmpanther:PTHR21493:SF87,    |
|                          |       | 2/15                                          |
|                          |       | 5/7                                           |
|                          |       | 3/12                                          |
|                          | 3/13  | Pfam_domain:PF14939                           |
|                          |       | 1/12                                          |
|                          |       | 13/28                                         |
|                          | 8/10  | '_complexity_(Seg):seg,hmmpanther:PTHR23004:€ |
|                          | 1/8   |                                               |
|                          | 4/6   | s:PS00903,Gene3D:3.40.140.10,Pfam_domain:PF(  |
|                          |       | 11/26                                         |
|                          |       | 8/26                                          |
|                          |       | 7/7                                           |
|                          |       | 19/21                                         |
| benign(0.014)            | 4/23  | TE_profiles:PS50211,hmmpanther:PTHR10877,hm   |
|                          |       | 1/10                                          |
|                          |       | 5/9                                           |
|                          |       | 8/25                                          |
|                          |       | 3/5                                           |
|                          |       | 7/10                                          |
|                          |       | 4/26                                          |
|                          |       | 12/22                                         |
|                          |       | 21/22                                         |
|                          |       | 12/27                                         |
|                          |       | 19/37                                         |
|                          | 17/17 |                                               |
|                          | 10/10 |                                               |
|                          |       | 9/9                                           |
|                          |       | 1/3                                           |
|                          |       | 18/27                                         |
|                          |       | 1/18                                          |
|                          |       | 21/31                                         |
|                          |       | 1/5                                           |

VEP annotated somatic variants

|               |       |                                               |
|---------------|-------|-----------------------------------------------|
|               |       | 10/15                                         |
|               |       | 14/20                                         |
|               |       | 61/82                                         |
|               |       | 29/58                                         |
|               |       | 56/83                                         |
|               |       | 53/83                                         |
|               |       | 55/83                                         |
|               |       | 71/83                                         |
|               |       | 62/83                                         |
|               |       | 2/80                                          |
|               |       | 28/90                                         |
|               |       | 64/68                                         |
|               |       | 3/5                                           |
|               |       | 3/5                                           |
|               |       | 16/16                                         |
|               |       | 38/51                                         |
|               |       | 41/52                                         |
| benign(0.05)  | 25/28 | F_domain:PIRSF037123,hmmpanther:PTHR21451     |
|               | 10/11 | HR10443:SF17,hmmpanther:PTHR10443,Gene3D      |
|               |       | 6/11                                          |
|               |       | 6/7                                           |
|               |       | 19/21                                         |
|               |       | 5/6                                           |
|               |       | 20/23                                         |
|               |       | 15/23                                         |
|               |       | 22/23                                         |
|               |       | 10/32                                         |
|               |       | 2/15                                          |
|               | 15/15 | hmmpanther:PTHR24025,hmmpanther:P             |
|               | 1/15  | site_(Signalp):SignalP-noTM,hmmpanther:PTHR24 |
|               |       | 2/23                                          |
|               | 14/83 |                                               |
|               | 2/2   |                                               |
|               | 2/9   |                                               |
|               | 1/5   |                                               |
| benign(0.001) | 5/12  | ains:SM00678,Pfam_domain:PF02825,hmmpanther   |
|               | 2/2   |                                               |
|               | 2/3   | anther:PTHR10159:SF45,Gene3D:3.40.250.10,PIR: |
|               |       | 8/16                                          |
|               |       | 82/89                                         |
| benign(0.001) | 1/10  |                                               |
|               | 2/5   | hmmpanther:PTHR14207:SF0,hmmpantf             |
| benign(0.093) | 9/19  | 349,hmmpanther:PTHR11733,hmmpanther:PTHR1     |
|               |       | 8/17                                          |
|               |       | 13/24                                         |
|               |       | 2/20                                          |
|               |       | 2/19                                          |
|               |       | 2/4                                           |
|               |       | 4/7                                           |
|               |       | 18/28                                         |
|               |       | 3/7                                           |
|               |       | 1/3                                           |
|               |       | 10/24                                         |
|               |       | 5/11                                          |
|               |       | 8/19                                          |

VEP annotated somatic variants

|                          |       |                                                    |
|--------------------------|-------|----------------------------------------------------|
|                          | 1/13  | hmmpanther:PTHR12086:SF10,hmmpanther:3/19<br>12/27 |
|                          | 2/12  | R23115,hmmpanther:PTHR23115:SF94,Gene3D:3          |
|                          | 9/9   | complexity_(Seg):seg,hmmpanther:PTHR11849,hn       |
|                          | 3/3   | 48,hmmpanther:PTHR24367,Pfam_domain:PF138          |
|                          | 3/3   | hmmpanther:PTHR24367:SF248,hmmpan                  |
|                          | 3/3   | as:TMhelix,PROSITE_profiles:PS50847,hmmpanth       |
|                          |       | 19/32                                              |
|                          |       | 6/7                                                |
| benign(0.008)            | 10/23 | hmmpanther:PTHR21573,hmmpanther:PTHR21573:SF       |
|                          |       | 10/10                                              |
|                          |       | 8/10                                               |
| benign(0)                | 16/23 | PTHR13720,hmmpanther:PTHR13720:SF22,Pfam_d         |
|                          |       | 8/22                                               |
|                          |       | 8/22                                               |
|                          | 1/2   | hmmpanther:PTHR24341,hmmpanther:P                  |
|                          |       | 13/14                                              |
|                          |       | 5/16                                               |
|                          |       | 1/9                                                |
|                          |       | 3/52                                               |
|                          |       | 11/19                                              |
| benign(0)                | 4/9   | 21661:SF10,Gene3D:3.40.50.1820,Pfam_domain:F       |
|                          | 13/19 | 8,hmmpanther:PTHR10992,Pfam_domain:PF0056          |
|                          |       | 7/21                                               |
|                          |       | 10/30                                              |
| possibly_damaging(0.669) | 18/23 | hmmpanther:PTHR10774,hmmpanther:PTHR10774:SF27,    |
| probably_damaging(1)     | 6/12  | 620,Pfam_domain:PF01012,PIRSF_domain:PIRSF         |
| probably_damaging(0.926) | 4/5   | domain:PF01012,hmmpanther:PTHR21294,SMART          |
|                          | 1/7   |                                                    |
|                          |       | 12/17                                              |
|                          |       | 2/18                                               |
|                          |       | 7/18                                               |
|                          |       | 9/21                                               |
|                          | 22/22 | hmmpanther:PTHR23169,hmmpanther:P                  |
|                          |       | 3/8                                                |
| benign(0.002)            | 13/16 | hmmpanther:PTHR11081,hmmpanther:P                  |
|                          |       | 18/18                                              |
|                          |       | 3/13                                               |
| benign(0)                | 14/26 | hmmpanther:PTHR10127:SF50,hmmpanther:PTHR1012      |
|                          |       | 7/25                                               |
| benign(0.217)            | 8/8   | 3,PROSITE_profiles:PS50240,hmmpanther:PTHR2        |
|                          |       | 1/10                                               |
|                          |       | 5/11                                               |
|                          |       | 5/11                                               |
|                          |       | 5/14                                               |
| probably_damaging(0.987) | 7/10  | Pfam_domain:PF13289                                |
|                          |       | 2/6                                                |
|                          |       | 2/6                                                |
|                          | 1/1   |                                                    |
|                          | 1/1   |                                                    |
|                          |       | 4/19                                               |
|                          | 3/4   | elicites:TMhelix,hmmpanther:PTHR13674:SF3,hmm      |
|                          |       | 2/7                                                |

VEP annotated somatic variants

|                          |       |                                                    |
|--------------------------|-------|----------------------------------------------------|
|                          | 1/1   |                                                    |
|                          |       | 12/17                                              |
|                          |       | 7/7                                                |
|                          |       | 2/11                                               |
|                          | 1/30  |                                                    |
|                          |       | 4/10                                               |
| benign(0.014)            | 21/23 | superfamily_domains:SSF48371, Gene3D:1.25.10.10, I |
|                          | 5/10  | iled-coils_(Ncoils):Coil, hmmpanther:PTHR22420, hr |
|                          |       | 9/42                                               |
|                          |       | 1/9                                                |
|                          |       | 2/9                                                |
|                          | 2/10  | hmmpanther:PTHR32094                               |
|                          | 12/12 |                                                    |
|                          |       | 10/26                                              |
|                          |       | 17/26                                              |
|                          | 22/43 | panther:PTHR11712, hmmpanther:PTHR11712:SF227      |
|                          |       | 22/42                                              |
|                          |       | 20/42                                              |
| possibly_damaging(0.723) | 2/18  | hmmpanther:PTHR24048, hmmpanther:P                 |
| benign(0.158)            | 47/64 | 36, PROSITE_profiles:PS50026, hmmpanther:PTHR      |
|                          |       | 3/16                                               |
|                          | 3/3   |                                                    |
|                          |       | 10/10                                              |
|                          |       | 4/10                                               |
|                          |       | 4/5                                                |
|                          |       | 5/10                                               |
|                          |       | 4/8                                                |
|                          |       | 4/7                                                |
| possibly_damaging(0.742) | 16/29 | hmmpanther:PTHR23065, hmmpanther:P                 |
|                          | 9/18  | 3F000628, hmmpanther:PTHR24416, hmmpanther:F       |
|                          | 9/9   |                                                    |
|                          |       | 10/24                                              |
|                          | 17/25 | 3213:SF213, hmmpanther:PTHR23213, Pfam_dom         |
|                          |       | 10/24                                              |
|                          |       | 2/2                                                |
|                          |       | 11/17                                              |
|                          | 6/9   | i, hmmpanther:PTHR10516:SF10, Low_complexity_(     |
|                          |       | 1/3                                                |
| possibly_damaging(0.779) | 9/48  | files:PS50194, hmmpanther:PTHR11915, hmmpantf      |
|                          |       | 11/46                                              |
|                          |       | 21/29                                              |
|                          |       | 13/17                                              |
|                          |       | 9/17                                               |
|                          | 4/9   | in:PIRSF000332, Prints_domain:PR00370, hmmpar      |
|                          | 1/17  | panther:PTHR23213, hmmpanther:PTHR23213:SF         |
|                          |       | 2/16                                               |
|                          |       | 18/22                                              |
|                          | 11/23 | hmmpanther:PTHR23197:SF8, hmmpantl                 |
|                          | 2/2   | hmmpanther:PTHR25042, hmmpanther:P                 |
|                          |       | 3/16                                               |
|                          | 15/15 |                                                    |
|                          | 17/74 | HR11878, Gene3D:2.10.220.10, SMART_domains:SI      |
|                          |       | 53/73                                              |

VEP annotated somatic variants

|                          |       |                                                                                         |
|--------------------------|-------|-----------------------------------------------------------------------------------------|
|                          | 56/74 | hmmpanther:PTHR11878,Pfam_domain:PF03160,SMART                                          |
|                          |       | 16/73                                                                                   |
|                          |       | 57/73                                                                                   |
|                          | 1/8   | hmmpanther:PTHR11878,hmmpanther:PTHR11878                                               |
|                          |       | 20/24                                                                                   |
|                          |       | 5/11                                                                                    |
|                          |       | 12/15                                                                                   |
|                          | 18/19 | hmmpanther:PTHR10288:SF100,hmmpanther:PTHR10288                                         |
|                          |       | 3/3                                                                                     |
|                          | 3/3   |                                                                                         |
|                          |       | 2/5                                                                                     |
|                          |       | 8/17                                                                                    |
|                          |       | 14/14                                                                                   |
|                          |       | 15/27                                                                                   |
|                          |       | 4/27                                                                                    |
|                          |       | 14/16                                                                                   |
|                          |       | 4/7                                                                                     |
|                          |       | 7/11                                                                                    |
| possibly_damaging(0.889) | 15/16 | SMART_profiles:PS50231,hmmpanther:PTHR11675,hmmpanther:PTHR11675                        |
| benign(0)                | 1/11  | hmmpanther:PTHR11675,hmmpanther:PTHR11675                                               |
| benign(0.067)            | 9/11  | hmmpanther:PTHR11675:SF13,Gene3D:2.80.10.50,SMART_profiles:PS50231,hmmpanther:PTHR11675 |
|                          | 4/6   | hmmpanther:PTHR14454,hmmpanther:PTHR14454                                               |
| benign(0.001)            | 4/6   | hmmpanther:PTHR14454,hmmpanther:PTHR14454                                               |
|                          | 6/6   |                                                                                         |
|                          | 1/28  |                                                                                         |
|                          |       | 2/11                                                                                    |
|                          |       | 11/11                                                                                   |
|                          | 7/12  | SMART_profiles:PS51715,hmmpanther:PTHR12011                                             |
|                          | 12/14 | hmmpanther:PTHR12011:SF245,hmmpanther:PTHR12011                                         |
|                          |       | 1/2                                                                                     |
|                          |       | 10/14                                                                                   |
|                          |       | 3/5                                                                                     |
|                          |       | 1/1                                                                                     |
|                          |       | 3/9                                                                                     |
|                          |       | 11/17                                                                                   |
|                          |       | 1/14                                                                                    |
| unknown(0)               | 3/4   | hmmpanther:PTHR22979,hmmpanther:PTHR22979:SF13                                          |
| unknown(0)               | 3/4   | hmmpanther:PTHR22979,hmmpanther:PTHR22979:SF13                                          |
| benign(0.015)            | 9/9   | SMART_domain:PF03321,hmmpanther:PTHR31901,hmmpanther:PTHR31901                          |
|                          |       | 3/7                                                                                     |
| benign(0.015)            | 4/7   | hmmpanther:PTHR12914:SF2,hmmpanther:PTHR12914:SF2                                       |
|                          | 19/27 | SMART_profiles:PS51289,hmmpanther:PTHR11884,hmmpanther:PTHR11884                        |
|                          |       | 16/26                                                                                   |
|                          |       | 7/7                                                                                     |
|                          | 1/6   |                                                                                         |
| benign(0.002)            | 3/9   | SMART_profiles:PS50231,hmmpanther:PTHR18945,SMART_profiles:PS50231                      |
|                          |       | 4/8                                                                                     |
|                          |       | 10/10                                                                                   |
|                          |       | 3/5                                                                                     |
|                          |       | 8/13                                                                                    |
|                          | 2/3   | SMART_profiles:PS50231,hmmpanther:PTHR18945,SMART_profiles:PS50231                      |
| benign(0)                | 3/8   | SMART_profiles:PS50231,hmmpanther:PTHR18945,SMART_profiles:PS50231                      |
|                          | 1/3   | SMART_profiles:PS50262,hmmpanther:PTHR22979                                             |
|                          | 15/24 | (Seg):seg,Coiled-coils_(Ncoils):Coil,hmmpanther:PTHR22979                               |

VEP annotated somatic variants

|                          |       |                                               |
|--------------------------|-------|-----------------------------------------------|
|                          | 2/2   |                                               |
|                          | 7/9   | hmpanther:PTHR10822:SF26,hmmpanther:PTHR10/24 |
|                          |       | 6/7                                           |
| probably_damaging(0.923) | 1/14  | hmmpanther:PTHR21231,hmmpanther:P             |
| benign(0)                | 1/1   | 21,Pfam_domain:PF00001,Gene3D:1.20.1070.10,I  |
|                          | 3/16  |                                               |
|                          | 2/7   |                                               |
|                          |       | 3/6                                           |
|                          |       | 5/6                                           |
|                          |       | 1/2                                           |
|                          | 13/20 | hmmpanther:PTHR23319,hmmpanther:P             |
|                          |       | 6/17                                          |
|                          |       | 11/18                                         |
|                          |       | 16/18                                         |
|                          |       | 9/18                                          |
|                          |       | 20/32                                         |
|                          |       | 5/15                                          |
|                          |       | 2/15                                          |
|                          | 8/10  | as:TMhelix,PROSITE_profiles:PS50259,hmmpanth  |
|                          |       | 2/15                                          |
| benign(0.404)            | 13/17 | ,hmmpanther:PTHR11977,hmmpanther:PTHR1197     |
|                          | 1/1   |                                               |
|                          |       | 6/6                                           |
|                          |       | 1/8                                           |
|                          |       | 11/16                                         |
|                          | 17/17 |                                               |
|                          |       | 15/19                                         |
|                          | 7/7   |                                               |
|                          |       | 9/20                                          |
|                          |       | 2/3                                           |
|                          |       | 4/25                                          |
|                          |       | 20/25                                         |
|                          |       | 24/24                                         |
|                          |       | 4/5                                           |
|                          | 4/5   | 8901:SF10,Pfam_domain:PF13419,TIGRFAM_dor     |
|                          |       | 37/44                                         |
|                          |       | 17/44                                         |
|                          | 15/45 | anther:PTHR13457,hmmpanther:PTHR13457:SF1,;   |
| benign(0.006)            | 9/13  | HR16216:SF2,hmmpanther:PTHR16216,Gene3D:1     |
|                          |       | 13/42                                         |
|                          |       | 2/42                                          |
|                          |       | 11/21                                         |
|                          |       | 1/21                                          |
|                          |       | 9/10                                          |
|                          |       | 3/77                                          |
| probably_damaging(0.974) | 2/6   | nain:PF00129,hmmpanther:PTHR16675,hmmpantl    |
|                          | 8/18  | am_domain:PF00051,Gene3D:2.40.20.10,PIRSF_c   |
|                          |       | 4/11                                          |
|                          |       | 7/8                                           |
|                          | 1/3   | BSITE_profiles:PS51503,hmmpanther:PTHR12297,I |
|                          |       | 2/2                                           |
|                          | 1/1   |                                               |
|                          |       | 1/1                                           |





VEP annotated somatic variants

|               |       |                                             |                      |
|---------------|-------|---------------------------------------------|----------------------|
|               |       | 23/29                                       |                      |
|               |       | 16/29                                       |                      |
|               |       | 13/27                                       |                      |
|               |       | 16/27                                       |                      |
|               |       | 11/23                                       |                      |
|               | 4/24  | TE_profiles:PS51468,hmmpanther:PTHR10338,hm |                      |
|               |       | 20/23                                       |                      |
|               |       | 4/5                                         |                      |
|               |       | 2/7                                         |                      |
|               |       | 5/56                                        |                      |
|               |       | 49/56                                       |                      |
|               |       | 16/58                                       |                      |
|               | 3/3   | hmmpanther:PTHR10656:SF8,hmmpantl           |                      |
|               |       | 33/39                                       |                      |
|               |       | 30/39                                       |                      |
| 442.1         |       | 4/10                                        |                      |
|               |       | 4/10                                        |                      |
|               |       | 14/23                                       |                      |
|               |       | 2/17                                        |                      |
|               |       | 6/17                                        |                      |
|               | 7/18  |                                             | hmmpanther:PTHR10694 |
|               | 1/1   |                                             |                      |
|               | 16/16 |                                             |                      |
|               |       | 9/9                                         |                      |
|               | 3/10  | hmmpanther:PTHR24168,hmmpanther:P           |                      |
|               | 9/10  | hmmpanther:PTHR24168,hmmpanther:PTHR24168   |                      |
|               | 3/11  | MAP:MF_03023,hmmpanther:PTHR23074,hmm       |                      |
| benign(0)     | 2/2   | _(Seg):seg,hmmpanther:PTHR11537:SF19,hmmpa  |                      |
|               |       | 10/13                                       |                      |
|               |       | 3/26                                        |                      |
|               |       | 11/39                                       |                      |
|               |       | 2/6                                         |                      |
|               | 2/2   |                                             |                      |
|               |       | 16/23                                       |                      |
|               |       | 11/21                                       |                      |
|               |       | 14/22                                       |                      |
|               |       | 3/26                                        |                      |
| benign(0.008) | 17/29 | hmmpanther:PTHR14017:SF9,hmmpantl           |                      |
|               |       | 7/19                                        |                      |
|               | 12/20 | hmmpanther:PTHR23123,hmmpanther:P           |                      |
| benign(0.001) | 15/20 | hmmpanther:PTHR23123,hmmpanther:P           |                      |
|               | 1/10  |                                             |                      |
|               |       | 10/85                                       |                      |
| benign(0.001) | 12/34 | eg):seg,SMART_domains:SM00222,hmmpanther:l  |                      |
|               |       | 15/23                                       |                      |
|               | 4/4   | _profiles:PS50096,hmmpanther:PTHR22590,hmm  |                      |
|               |       | 1/3                                         |                      |
|               |       | 5/29                                        |                      |
|               | 2/15  | ROSITE_profiles:PS50067,hmmpanther:PTHR241  |                      |
|               |       | 5/19                                        |                      |
|               |       | 8/49                                        |                      |
|               |       | 14/22                                       |                      |
|               |       | 23/32                                       |                      |
|               |       | 8/19                                        |                      |
|               |       | 8/12                                        |                      |

VEP annotated somatic variants

|                          |       |                                              |
|--------------------------|-------|----------------------------------------------|
|                          | 3/4   | hmmpanther:PTHR23223,hmmpanther:P            |
|                          | 2/15  | _domain:PIRSF037037,hmmpanther:PTHR24412:5   |
|                          |       | 7/9                                          |
|                          |       | 3/4                                          |
|                          |       | 56/58                                        |
|                          |       | 17/29                                        |
|                          |       | 47/63                                        |
|                          | 7/10  | .profiles:PS50176,hmmpanther:PTHR23316,hmmp  |
|                          |       | 11/21                                        |
|                          |       | 5/9                                          |
|                          |       | 7/7                                          |
|                          |       | 3/6                                          |
|                          | 7/7   |                                              |
|                          | 1/1   |                                              |
|                          | 1/1   |                                              |
|                          | 1/1   | hmmpanther:PTHR23262,hmmpanther:P            |
|                          |       | 10/16                                        |
|                          |       | 32/64                                        |
|                          |       | 2/64                                         |
|                          |       | 9/38                                         |
|                          |       | 8/38                                         |
|                          |       | 19/27                                        |
|                          |       | 4/27                                         |
|                          |       | 23/27                                        |
|                          | 1/23  |                                              |
|                          | 4/8   | hmmpanther:PTHR24356,hmmpanther:PT           |
|                          | 1/1   |                                              |
|                          |       | 6/6                                          |
|                          |       | 4/4                                          |
|                          |       | 4/12                                         |
|                          |       | 4/7                                          |
|                          |       | 4/7                                          |
|                          |       | 9/15                                         |
| benign(0.001)            | 1/1   | er:PTHR24371,Gene3D:2.60.40.10,Pfam_domain:F |
|                          |       | 13/16                                        |
|                          |       | 10/26                                        |
|                          |       | 12/17                                        |
|                          |       | 1/11                                         |
|                          | 1/11  |                                              |
|                          |       | 3/10                                         |
|                          |       | 2/6                                          |
|                          |       | 7/10                                         |
|                          |       | 13/20                                        |
|                          |       | 90/90                                        |
|                          |       | 11/22                                        |
| probably_damaging(0.996) | 5/6   | 20,hmmpanther:PTHR10529,hmmpanther:PTHR10    |
|                          |       | 5/5                                          |
|                          |       | 2/7                                          |
|                          |       | 2/3                                          |
| benign(0.082)            | 1/2   |                                              |
|                          | 19/19 |                                              |
|                          |       | 21/26                                        |
| benign(0.013)            | 3/14  | hmmpanther:PTHR11089,hmmpanther:P            |
| benign(0.077)            | 5/10  | hmmpanther:PTHR13586,hmmpanther:P            |
|                          | 4/4   |                                              |

VEP annotated somatic variants

|                          |       |                                              |  |
|--------------------------|-------|----------------------------------------------|--|
|                          |       | 12/21                                        |  |
|                          |       | 23/29                                        |  |
|                          |       | 8/11                                         |  |
|                          |       | 2/4                                          |  |
|                          | 1/3   |                                              |  |
|                          | 1/4   |                                              |  |
|                          |       | 11/18                                        |  |
|                          |       | 2/4                                          |  |
|                          |       | 2/2                                          |  |
|                          | 3/3   | SITE_profiles:PS50838,hmmpanther:PTHR11736,f |  |
|                          | 1/1   |                                              |  |
|                          |       | 3/3                                          |  |
|                          | 3/3   | 01454,PROSITE_profiles:PS50838,hmmpanther:P  |  |
|                          |       | 2/12                                         |  |
|                          |       | 19/26                                        |  |
|                          | 5/5   | hmmpanther:PTHR15275,hmmpanther:P            |  |
|                          |       | 10/12                                        |  |
|                          | 8/22  | panther:PTHR11607:SF20,Gene3D:3.20.110.10,F  |  |
| benign(0)                | 6/19  | omain:PF01074,hmmpanther:PTHR11607,hmmpar    |  |
| benign(0.002)            | 5/7   | hmmpanther:PTHR13843                         |  |
| possibly_damaging(0.687) | 4/29  | m_domain:PF13281,hmmpanther:PTHR11584,hmr    |  |
|                          |       | 16/16                                        |  |
|                          | 13/32 | panther:PTHR24361:SF88,hmmpanther:PTHR2436   |  |
|                          |       | 5/29                                         |  |
|                          |       | 5/12                                         |  |
|                          |       | 5/25                                         |  |
|                          | 10/26 | hmmpanther:PTHR24356,hmmpanther:PT           |  |
|                          | 1/29  |                                              |  |
| benign(0.023)            | 4/11  | mains:SM00327,Pfam_domain:PF00092,Gene3D:3   |  |
|                          |       | 13/18                                        |  |
|                          |       | 20/28                                        |  |
|                          | 4/17  | MART_domains:SM00409,hmmpanther:PTHR23282    |  |
|                          |       | 93/101                                       |  |
|                          |       | 93/101                                       |  |
|                          | 3/3   | F_domain:PIRSF038006,hmmpanther:PTHR15074    |  |
|                          |       | 29/30                                        |  |
|                          | 2/5   |                                              |  |
|                          |       | 12/17                                        |  |
| benign(0.149)            | 3/4   | Pfam_domain:PF11568                          |  |
|                          |       | 2/12                                         |  |
|                          |       | 24/36                                        |  |
|                          |       | 14/14                                        |  |
|                          | 19/19 |                                              |  |
|                          |       | 3/10                                         |  |
|                          | 6/10  | ain:PIRSF037755,Gene3D:3.40.50.150,Pfam_dorr |  |
|                          |       | 7/10                                         |  |
|                          | 12/16 | panther:PTHR15075:SF4,hmmpanther:PTHR15      |  |
|                          |       | 8/15                                         |  |
|                          | 10/16 | panther:PTHR15075:SF4,hmmpanther:PTHR15      |  |
| benign(0.089)            | 3/5   | 3155,Gene3D:3I00A01,Pfam_domain:PF02870,hm   |  |
|                          |       | 8/31                                         |  |
|                          |       | 16/31                                        |  |
|                          |       | 12/31                                        |  |
|                          |       | 6/9                                          |  |

VEP annotated somatic variants

|                          |       |                                                |       |
|--------------------------|-------|------------------------------------------------|-------|
|                          |       |                                                | 2/31  |
|                          |       |                                                | 20/31 |
|                          |       |                                                | 2/4   |
|                          |       |                                                | 8/9   |
|                          |       |                                                | 2/11  |
|                          |       |                                                | 4/6   |
|                          |       |                                                | 1/2   |
| benign(0.035)            | 4/5   | 093, Gene3D:1pi1A00, Pfam_domain:PF03637, hmm  | 7/16  |
| benign(0)                | 12/17 | hmmpanther:PTHR23336, hmmpanther:P             | 2/12  |
|                          |       |                                                | 2/5   |
|                          |       |                                                | 2/19  |
| benign(0)                | 3/24  |                                                |       |
| benign(0)                | 10/24 | panther:PTHR23120, hmmpanther:PTHR23120:SF9,:  |       |
| possibly_damaging(0.641) | 7/24  | panther:PTHR23120, hmmpanther:PTHR23120:SF9,:  |       |
|                          |       |                                                | 3/4   |
|                          |       |                                                | 1/1   |
|                          |       |                                                | 2/5   |
|                          |       |                                                | 6/6   |
|                          |       |                                                | 2/20  |
|                          |       |                                                | 2/15  |
|                          |       |                                                | 3/5   |
|                          | 49/58 | panther:PTHR11139:SF63, Pfam_domain:PF00454    |       |
|                          | 29/33 | o2kA01, TIGRFAM_domain:TIGR02082, Pfam_dom     |       |
|                          |       |                                                | 32/32 |
|                          |       |                                                | 15/32 |
|                          |       |                                                | 29/32 |
|                          |       |                                                | 7/18  |
|                          |       |                                                | 59/83 |
|                          | 1/84  |                                                |       |
|                          | 4/84  |                                                |       |
|                          |       |                                                | 73/83 |
|                          | 42/49 | hmmpanther:PTHR11339, hmmpanther:PT            |       |
|                          |       |                                                | 8/9   |
|                          | 7/7   | mmpanther:PTHR10489, hmmpanther:PTHR10489      |       |
|                          | 3/3   | s:PS51225, hmmpanther:PTHR17068:SF5, hmmpa     |       |
|                          |       |                                                | 4/34  |
| benign(0.419)            | 29/42 | oils):Coil, Pfam_domain:PF01576, hmmpanther:PT |       |
|                          |       |                                                | 21/41 |
|                          | 12/40 | 456, hmmpanther:PTHR13140, hmmpanther:PTHR1    |       |
|                          |       |                                                | 18/39 |
|                          |       |                                                | 29/39 |
|                          |       |                                                | 26/40 |
|                          | 19/34 | mpanther:PTHR22964:SF44, Pfam_domain:PF0767    |       |
|                          |       |                                                | 45/65 |
|                          |       |                                                | 18/43 |
|                          |       |                                                | 15/25 |
|                          |       |                                                | 25/27 |
|                          |       |                                                | 32/40 |
|                          |       |                                                | 12/39 |
|                          | 1/3   |                                                |       |
|                          | 5/20  |                                                |       |
|                          |       | hmmpanther:PTHR19897                           |       |
|                          |       |                                                | 25/26 |
|                          |       |                                                | 12/19 |

VEP annotated somatic variants

|                          |       |                                                                                       |
|--------------------------|-------|---------------------------------------------------------------------------------------|
|                          |       | 21/22                                                                                 |
|                          | 2/5   | hmmpanther:PTHR23228:SF7,hmmpantl                                                     |
| benign(0.038)            | 7/9   | rain:PF00026,hmmpanther:PTHR13683,hmmpanth<br>3/6                                     |
| possibly_damaging(0.67)  | 21/21 | 40/51<br>nmpanther:PTHR20930,hmmpanther:PTHR20930:<br>17/20<br>3/20<br>4/20           |
| probably_damaging(0.999) | 3/15  | mpanther:PTHR22804:SF24,Pfam_domain:PF0766<br>5/31<br>28/34<br>14/17<br>9/15<br>42/45 |
|                          | 13/15 | PF00346,hmmpanther:PTHR11993,hmmpanther:P<br>74/181<br>18/181<br>6/181                |
|                          | 8/11  | hmmpanther:PTHR13328,Low_comple:                                                      |
|                          | 4/4   | hmmpanther:PTHR10281                                                                  |
| benign(0.003)            | 9/13  | 3/3<br>coiled-coils_(Ncoils):Coil,hmmpanther:PTHR22964,<br>15/23<br>2/22<br>2/11      |
|                          | 1/1   | Low_complexity_(Seg):seg,hmmpanthe<br>1/6<br>11/19<br>21/29<br>8/11                   |
| benign(0)                | 5/6   | R12570,hmmpanther:PTHR12570:SF7,Pfam_dom<br>46/46<br>3/9<br>13/20                     |
| benign(0.002)            | 2/2   | 10.60,hmmpanther:PTHR24340,hmmpanther:PTHF<br>6/7<br>9/9<br>13/14                     |
|                          | 11/15 | ,hmmpanther:PTHR24106,Gene3D:3.80.10.10,SM/<br>2/14<br>5/8<br>11/14<br>5/25<br>15/17  |
|                          | 12/12 | 8/9                                                                                   |
| benign(0.001)            | 8/27  | 9384,hmmpanther:PTHR19384:SF66,Pfam_domair<br>15/26<br>27/33<br>16/33                 |
| probably_damaging(0.922) | 20/20 | hmmpanther:PTHR10796,hmmpanther:P                                                     |
| possibly_damaging(0.856) | 4/4   | 1,PROSITE_patterns:PS00237,Pfam_domain:PF0C                                           |
|                          | 6/9   | nain:PR00896,PROSITE_profiles:PS50262,hmmpa                                           |

VEP annotated somatic variants

| Variant ID               | Count | Annotations                                                                                                                                                            |
|--------------------------|-------|------------------------------------------------------------------------------------------------------------------------------------------------------------------------|
|                          | 3/4   |                                                                                                                                                                        |
| 1_001077482.2            | 1/8   |                                                                                                                                                                        |
|                          | 5/23  | 12/13<br>hmmpanther:PTHR22884,hmmpanther:PT<br>14/18<br>13/13                                                                                                          |
| benign(0.124)            | 4/6   | HR12356:SF16,hmmpanther:PTHR12356,Pfam_d<br>5/9                                                                                                                        |
|                          | 5/19  | 9331,hmmpanther:PTHR19331:SF254,Pfam_dom:<br>12/27<br>33/35                                                                                                            |
|                          | 1/8   |                                                                                                                                                                        |
|                          | 8/8   |                                                                                                                                                                        |
|                          |       | 8/11<br>11/11<br>16/16<br>13/16<br>2/19<br>15/15<br>15/15<br>15/15<br>5/7<br>4/5                                                                                       |
|                          | 5/21  | PTHR1990,hmmpanther:PTHR1990:SF1,Gene3D                                                                                                                                |
|                          | 10/10 |                                                                                                                                                                        |
|                          |       | 1/1                                                                                                                                                                    |
| benign(0.094)            | 1/1   |                                                                                                                                                                        |
|                          | 1/1   | PROSITE_profiles:PS50262,hmmpanther:PTHR26451,PROSITE_profiles:PS50262,hmmpanther:PTHR26451                                                                            |
| benign(0.15)             | 1/1   | 10,hmmpanther:PTHR26451,hmmpanther:PTHR26451                                                                                                                           |
|                          | 1/1   | r:PTHR26450:SF28,hmmpanther:PTHR26450,Pfam_domain:PR00245,PROSITE_profiles:PS50262,hmmpanther:PTHR26452,hmmpanther:PTHR26452,hmmpanther:PTHR26452,hmmpanther:PTHR26452 |
| benign(0)                | 1/1   |                                                                                                                                                                        |
|                          | 1/1   |                                                                                                                                                                        |
|                          | 1/1   |                                                                                                                                                                        |
|                          | 1/1   |                                                                                                                                                                        |
|                          | 1/1   |                                                                                                                                                                        |
|                          | 1/1   |                                                                                                                                                                        |
|                          | 4/13  |                                                                                                                                                                        |
|                          | 5/5   |                                                                                                                                                                        |
|                          | 6/6   | main:PF13738,hmmpanther:PTHR15192,hmmpanther:PTHR15192                                                                                                                 |
|                          |       | 11/17<br>3/10                                                                                                                                                          |
| benign(0)                | 10/10 | Low_complexity_(Seg):seg                                                                                                                                               |
|                          | 1/1   | main:PR01066,PROSITE_profiles:PS50262,hmmpanther:PTHR24011,PROSITE_profiles:PS50262,hmmpanther:PTHR24011                                                               |
| possibly_damaging(0.794) | 5/11  | m_domain:PF13848,Gene3D:3.40.30.10,TIGRFAM                                                                                                                             |
|                          | 5/16  | PTHR24011,hmmpanther:PTHR24011:SF265,SMART                                                                                                                             |
|                          |       | 10/23<br>3/4<br>2/8<br>3/6                                                                                                                                             |
| benign(0.057)            | 1/7   | Low_complexity_(Seg):seg,hmmpanther:PTHR12280,hmmpanther:PTHR12280                                                                                                     |
|                          | 13/19 | 12280,Pfam_domain:PF01937,PIRSF_domain:PIRSF01937                                                                                                                      |
|                          |       | 19/21                                                                                                                                                                  |

VEP annotated somatic variants

|               |                |                                                                                                                                       |
|---------------|----------------|---------------------------------------------------------------------------------------------------------------------------------------|
| benign(0.007) | 2/2<br>6/13    | .10,hmmpanther:PTHR12114,hmmpanther:PTHR1<br>10/13<br>4/11                                                                            |
| unknown(0)    | 1/1            | 18/33                                                                                                                                 |
| benign(0.23)  | 5/5            | hmmpanther:PTHR24027:SF25,hmmpant<br>6/24                                                                                             |
| benign(0)     | 5/8            | PTHR11579,Pfam_domain:PF01135,Gene3D:3.40.5<br>37/46                                                                                  |
| benign(0)     | 1/3            | hmmpanther:PTHR12121,hmmpanther:P                                                                                                     |
|               | 26/31<br>1/22  | ,Pfam_domain:PF00233,Gene3D:1.10.1300.10,SM<br>:PTHR11347,hmmpanther:PTHR11347:SF23,Low_<br>9/22                                      |
|               | 23/23          | nther:PTHR24416:SF53,hmmpanther:PTHR24416,<br>22/22<br>3/11<br>22/22                                                                  |
| benign(0.01)  | 7/7            | profiles:PS50011,hmmpanther:PTHR22972,hmmpar<br>4/23                                                                                  |
|               | 3/24<br>12/24  | 52,hmmpanther:PTHR24052:SF9,Low_complexity_<br>A03,hmmpanther:PTHR24052,hmmpanther:PTHR:<br>main:PF00557,hmmpanther:PTHR10804,hmmpant |
| benign(0.029) | 14/15<br>15/15 | 11/21<br>10/21<br>16/26<br>8/10                                                                                                       |
| benign(0.027) | 3/5<br>1/7     | ains:SM00701,SMART_domains:SM00644,Gene3<br>6/21<br>39/39<br>9/31<br>20/23                                                            |
|               | 4/18<br>6/6    | :PTHR15242,PROSITE_patterns:PS00518,Pfam_c<br>9/10                                                                                    |
| benign(0.007) | 22/31<br>2/2   | Pfam_domain:PF04987,hmmpanther:<br>hmmpanther:PTHR20661,PIRSF_domai<br>17/18                                                          |
| 51851.1       |                | 5/41                                                                                                                                  |
|               | 2/6            | PTHR22984,Pfam_domain:PF00069,Gene3D:3.30.:<br>2/20                                                                                   |
|               | 2/2<br>1/2     | hmmpanther:PTHR15710,hmmpanther:P<br>50/66<br>10/13<br>2/11<br>11/13<br>15/57<br>21/31<br>9/31                                        |



VEP annotated somatic variants

|                          |       |                                                |                          |
|--------------------------|-------|------------------------------------------------|--------------------------|
|                          |       | 30/31                                          |                          |
| benign(0)                | 23/32 | 49, Gene3D:3.20.20.190, Pfam_domain:PF00387, h |                          |
|                          |       | 2/32                                           |                          |
|                          |       | 1/21                                           |                          |
|                          |       | 8/21                                           |                          |
| unknown(0)               | 30/32 | 915, hmmpanther:PTHR11915:SF247, SMART_dom     |                          |
|                          | 5/32  | l, PROSITE_profiles:PS50021, hmmpanther:PTHR1  |                          |
|                          | 32/32 |                                                |                          |
|                          | 32/32 | l, hmmpanther:PTHR11915, hmmpanther:PTHR119    |                          |
|                          | 32/32 | panther:PTHR11915, hmmpanther:PTHR11915:SF:    |                          |
|                          | 32/32 | l, hmmpanther:PTHR11915, hmmpanther:PTHR119    |                          |
|                          |       | 8/21                                           |                          |
|                          |       | 22/28                                          |                          |
|                          |       | 14/28                                          |                          |
|                          |       | 28/28                                          |                          |
|                          |       | 12/15                                          |                          |
|                          |       | 6/12                                           |                          |
|                          |       | 11/13                                          |                          |
|                          |       | 8/36                                           |                          |
|                          |       | 2/11                                           |                          |
| benign(0)                | 7/8   | hmmpanther:PTHR12406, hmmpanther:P             |                          |
|                          |       | 8/8                                            |                          |
|                          | 19/34 | ofiles:PS50042, hmmpanther:PTHR14226, hmmpan   |                          |
|                          |       | 1/2                                            |                          |
|                          |       | 2/7                                            |                          |
|                          |       | 2/8                                            |                          |
|                          |       | 8/8                                            |                          |
|                          |       | 11/22                                          |                          |
| benign(0.001)            | 2/2   | , Gene3D:1.10.260.40, Pfam_domain:PF00157, PRC |                          |
| benign(0)                | 1/7   |                                                |                          |
|                          | 7/7   | 04, Prints_domain:PR00398, hmmpanther:PTHR240  |                          |
|                          |       | 8/20                                           |                          |
|                          | 1/7   | panther:PTHR13832, hmmpanther:PTHR13832:SF:    |                          |
|                          |       | 2/12                                           |                          |
|                          |       | 2/2                                            |                          |
|                          | 7/7   |                                                |                          |
|                          |       | 2/13                                           |                          |
|                          |       | 2/5                                            |                          |
|                          |       | 6/15                                           |                          |
|                          |       | 8/9                                            |                          |
|                          |       | 1/6                                            |                          |
|                          |       | 1/6                                            |                          |
|                          |       | 1/6                                            |                          |
|                          |       | 1/14                                           |                          |
|                          |       | 20/39                                          |                          |
|                          |       | 3/5                                            |                          |
|                          | 3/14  |                                                |                          |
|                          |       | 12/17                                          |                          |
|                          |       | 16/17                                          |                          |
|                          |       | 6/17                                           |                          |
|                          |       | 7/16                                           |                          |
| possibly_damaging(0.852) | 3/3   |                                                | Low_complexity_(Seg):seq |
|                          |       | 6/9                                            |                          |
|                          |       | 13/16                                          |                          |
|                          |       | 12/14                                          |                          |

VEP annotated somatic variants

|                          |       |                                                  |
|--------------------------|-------|--------------------------------------------------|
|                          |       | 18/18                                            |
|                          |       | 2/5                                              |
|                          |       | 3/5                                              |
|                          |       | 5/5                                              |
|                          |       | 7/10                                             |
|                          |       | 6/6                                              |
|                          | 1/7   |                                                  |
|                          |       | 4/9                                              |
|                          |       | 16/20                                            |
|                          |       | 13/33                                            |
|                          |       | 1/29                                             |
|                          |       | 22/30                                            |
|                          | 16/23 | PROSITE_profiles:PS50055,hmmpanther:PTHR19       |
|                          |       | 2/2                                              |
|                          |       | 19/21                                            |
|                          |       | 11/21                                            |
|                          |       | 21/21                                            |
|                          |       | 21/21                                            |
|                          |       | 1/2                                              |
|                          | 1/12  |                                                  |
|                          |       | 3/14                                             |
| benign(0.003)            | 2/6   | 24073,hmmpanther:PTHR24073:SF137,Gene3D:3        |
|                          | 1/3   |                                                  |
|                          |       | 2/7                                              |
|                          |       | 5/18                                             |
|                          | 14/16 | omain:PF00560,PROSITE_profiles:PS51450,Low_c     |
|                          |       | 2/5                                              |
|                          |       | 2/10                                             |
|                          | 10/15 | 01843,PROSITE_profiles:PS51126,hmmpanther:F      |
|                          |       | 15/16                                            |
|                          |       | 3/19                                             |
|                          |       | 18/24                                            |
|                          |       | 21/27                                            |
|                          |       | 3/7                                              |
| probably_damaging(0.972) | 1/6   | hmmpanther:PTHR22738,hmmpanther:P                |
|                          | 21/24 | iled-coils_(Ncoils):Coil,hmmpanther:PTHR13948:SF |
|                          |       | 12/20                                            |
|                          |       | 14/20                                            |
|                          |       | 1/6                                              |
|                          | 13/21 | hmmpanther:PTHR13487                             |
|                          |       | 3/11                                             |
|                          |       | 6/19                                             |
|                          | 1/3   | 1,hmmpanther:PTHR21101:SF13,Low_complexity_      |
|                          | 1/2   |                                                  |
|                          | 13/13 |                                                  |
|                          |       | 12/12                                            |
|                          |       | 4/9                                              |
|                          | 1/19  |                                                  |
|                          |       | 14/17                                            |
|                          | 1/7   |                                                  |
|                          | 8/8   |                                                  |
|                          |       | 5/8                                              |
|                          | 1/9   |                                                  |
|                          |       | 1/7                                              |
|                          | 2/7   | rofiles:PS50088,PROSITE_profiles:PS50297,hmmp    |

VEP annotated somatic variants

|               |        |                                            |        |
|---------------|--------|--------------------------------------------|--------|
|               | 5/5    |                                            | 8/8    |
|               |        |                                            | 2/8    |
|               | 3/3    |                                            | 14/30  |
|               |        |                                            | 8/30   |
| benign(0)     | 10/33  | panther:PTHR22988:SF24,hmmpanther:PTHR2298 | 7/8    |
|               |        |                                            | 11/42  |
|               |        |                                            | 10/12  |
|               |        |                                            | 30/33  |
|               |        |                                            | 8/16   |
|               |        |                                            | 2/9    |
|               |        |                                            | 4/4    |
|               | 1/5    |                                            |        |
|               | 1/5    |                                            |        |
|               | 2/10   | hmmpanther:PTHR11363,Superfamily_do        |        |
|               | 5/7    | ain:PIRSF002116,Pfam_domain:PF00900,hmmpa  |        |
|               |        |                                            | 14/21  |
|               |        |                                            | 23/33  |
|               | 22/34  | hmmpanther:PTHR12848,Superfamily_do        |        |
|               |        |                                            | 2/15   |
|               | 7/16   | hmmpanther:PTHR13026,hmmpanther:PTHR13026: |        |
|               | 4/9    | IGRFAM_domain:TIGR00539,Gene3D:2qgqB01,Pf  |        |
|               |        |                                            | 2/7    |
| benign(0.003) | 3/9    | hmmpanther:PTHR10994,hmmpanther:P          |        |
|               |        |                                            | 1/17   |
|               | 18/18  | THR22835:SF84,hmmpanther:PTHR22835,Pfam_c  |        |
|               |        |                                            | 9/9    |
|               | 26/106 | 188,hmmpanther:PTHR13715,hmmpanther:PTHR   |        |
|               |        |                                            | 3/105  |
|               | 39/106 | hmmpanther:PTHR13715,hmmpanther:P          |        |
|               |        |                                            | 47/105 |
|               |        |                                            | 9/104  |
|               |        |                                            | 35/104 |
|               |        |                                            | 2/103  |
|               |        |                                            | 2/3    |
|               |        |                                            | 6/20   |
|               |        |                                            | 2/4    |
|               | 40/41  | mpanther:PTHR10807:SF43,Pfam_domain:PF0016 |        |
|               |        |                                            | 30/39  |
|               |        |                                            | 6/10   |
|               | 4/9    | hmmpanther:PTHR10687,hmmpanther:P          |        |
|               |        |                                            | 6/10   |
|               |        |                                            | 3/32   |
| benign(0.001) | 1/16   | ,hmmpanther:PTHR11977,hmmpanther:PTHR1197  |        |
|               |        |                                            | 12/20  |
|               |        |                                            | 20/20  |
|               |        |                                            | 10/27  |
| benign(0)     | 19/27  | mpanther:PTHR10037,hmmpanther:PTHR10037:S  |        |

VEP annotated somatic variants

| Variant                  | Count | Annotations                                   |
|--------------------------|-------|-----------------------------------------------|
|                          | 26/26 |                                               |
|                          | 8/44  |                                               |
|                          | 5/8   |                                               |
| benign(0.156)            | 2/12  | 1,hmmpanther:PTHR23324,Gene3D:3.40.525.10,F   |
|                          | 12/25 |                                               |
| possibly_damaging(0.516) | 13/20 | F3,hmmpanther:PTHR11141,Pfam_domain:PF080:    |
|                          | 7/22  |                                               |
|                          | 9/25  |                                               |
|                          | 3/25  |                                               |
| benign(0.001)            | 4/26  | 10,hmmpanther:PTHR13923,hmmpanther:PTHR1:     |
|                          | 14/25 |                                               |
|                          | 5/16  |                                               |
| benign(0)                | 5/5   |                                               |
|                          | 4/13  |                                               |
|                          | 13/16 |                                               |
|                          | 4/16  |                                               |
|                          | 1/16  |                                               |
|                          | 8/18  |                                               |
|                          | 10/10 |                                               |
|                          | 3/4   |                                               |
|                          | 1/1   |                                               |
|                          | 10/16 |                                               |
|                          | 5/16  |                                               |
|                          | 10/22 |                                               |
|                          | 2/17  |                                               |
|                          | 20/25 |                                               |
|                          | 1/1   |                                               |
|                          | 12/14 |                                               |
|                          | 11/23 |                                               |
|                          | 9/23  |                                               |
|                          | 10/21 |                                               |
|                          | 14/14 | hmmpanther:PTHR15706,hmmpanther:P             |
|                          | 8/22  |                                               |
|                          | 7/22  |                                               |
|                          | 1/2   |                                               |
| benign(0)                | 6/10  | hmmpanther:PTHR15012,hmmpanther:P             |
|                          | 1/7   |                                               |
|                          | 2/13  |                                               |
|                          | 10/10 |                                               |
|                          | 7/21  |                                               |
|                          | 3/6   |                                               |
|                          | 1/3   | hmmpanther:PTHR10361,hmmpanther:PT            |
| benign(0.06)             | 1/6   | er:PTHR10361,hmmpanther:PTHR10361:SF4,TIGI    |
|                          | 4/23  |                                               |
|                          | 5/14  |                                               |
| unknown(0)               | 1/6   | .complexity_(Seg):seg,hmmpanther:PTHR11360,hn |
|                          | 6/8   |                                               |
|                          | 3/8   |                                               |
|                          | 1/10  | TIGR00898,hmmpanther:PTHR24064,hmmpanther:    |
|                          | 9/14  |                                               |
|                          | 6/17  | 1699,hmmpanther:PTHR10846,hmmpanther:PTHR     |
|                          | 2/17  |                                               |
|                          | 5/11  |                                               |

VEP annotated somatic variants

|                                          |        |                                                |                      |
|------------------------------------------|--------|------------------------------------------------|----------------------|
|                                          |        | 5/11                                           |                      |
|                                          |        | 16/17                                          |                      |
|                                          |        | 8/18                                           |                      |
|                                          |        | 13/17                                          |                      |
|                                          |        | 8/9                                            |                      |
|                                          |        | 7/9                                            |                      |
|                                          |        | 2/7                                            |                      |
|                                          |        | 7/7                                            |                      |
|                                          |        | 12/18                                          |                      |
|                                          |        | 7/15                                           |                      |
|                                          |        | 7/10                                           |                      |
| 6/8                                      |        | nmpanther:PTHR19432:SF7,hmmpanther:PTHR19      |                      |
|                                          |        | 8/22                                           |                      |
|                                          |        | 14/14                                          |                      |
|                                          |        | 12/13                                          |                      |
|                                          |        | 6/11                                           |                      |
|                                          |        | 1/13                                           |                      |
|                                          |        | 6/10                                           |                      |
| 9/11                                     |        | R11785:SF113,hmmpanther:PTHR11785,TIGRFAI      |                      |
| 1/17                                     |        | (Seg):seg,hmmpanther:PTHR10110,hmmpanther:f    |                      |
|                                          |        | 5/13                                           |                      |
|                                          |        | 18/24                                          |                      |
|                                          |        | 7/23                                           |                      |
|                                          |        | 11/24                                          |                      |
| 2/12                                     |        | PS51465,hmmpanther:PTHR12352:SF10,hmmpant      |                      |
|                                          |        | 15/20                                          |                      |
|                                          |        | 8/11                                           |                      |
|                                          |        | 28/32                                          |                      |
|                                          |        | 22/26                                          |                      |
| 5/49                                     |        |                                                | hmmpanther:PTHR21963 |
| 11/49                                    |        |                                                | hmmpanther:PTHR21963 |
| 2/2                                      |        | ampanther:PTHR23425:SF5,hmmpanther:PTHR23      |                      |
|                                          |        | 1/4                                            |                      |
|                                          |        | 32/40                                          |                      |
| probably_damaging(0.993<br>benign(0.184) | 30/41  | hmmpanther:PTHR19897,hmmpanther:PT             |                      |
|                                          | 7/7    | membrane_helices:TMhelix,hmmpanther:PTHR10083  |                      |
|                                          | 1/11   | _site_(Signalp):SignalP-noTM,hmmpanther:PTHR1: |                      |
|                                          |        | 41/67                                          |                      |
|                                          |        | 24/67                                          |                      |
| possibly_damaging(0.539                  | 25/34  | hmmpanther:PTHR10799,hmmpanther:PT             |                      |
|                                          | 87/109 |                                                |                      |
|                                          |        | 65/108                                         |                      |
|                                          | 90/109 |                                                |                      |
|                                          |        | 8/11                                           |                      |
|                                          | 6/6    |                                                |                      |
|                                          |        | 2/8                                            |                      |
|                                          |        | 3/8                                            |                      |
|                                          |        | 4/5                                            |                      |
|                                          | 34/69  | ),hmmpanther:PTHR24038,Pfam_domain:PF02466     |                      |
|                                          |        | 2/9                                            |                      |
|                                          | 5/9    | nther:PTHR16186,hmmpanther:PTHR16186:SF10,     |                      |
|                                          |        | 24/32                                          |                      |
|                                          |        | 5/23                                           |                      |
|                                          |        | 17/18                                          |                      |

VEP annotated somatic variants

|                          |       |                                               |  |
|--------------------------|-------|-----------------------------------------------|--|
|                          |       | 6/14                                          |  |
|                          | 5/7   | IR10264,hmmpanther:PTHR10264:SF70,Pfam_doi    |  |
|                          | 1/5   |                                               |  |
|                          |       | 5/17                                          |  |
|                          |       | 3/20                                          |  |
|                          |       | 13/20                                         |  |
|                          |       | 26/27                                         |  |
| benign(0.209)            | 6/11  | mpanther:PTHR24418:SF216,Gene3D:1.10.510.10   |  |
|                          | 3/3   |                                               |  |
| benign(0.004)            | 1/1   | mpanther:PTHR10562:SF10,Pfam_domain:PF1197    |  |
|                          |       | 26/30                                         |  |
|                          |       | 8/30                                          |  |
|                          |       | 2/4                                           |  |
|                          |       | 2/11                                          |  |
|                          | 26/27 | _complexity_(Seg):seg,hmmpanther:PTHR15245,hi |  |
|                          |       | 10/10                                         |  |
|                          | 6/116 | 34,hmmpanther:PTHR11915,Gene3D:1.10.418.10,I  |  |
|                          |       | 44/115                                        |  |
|                          | 20/27 | !,PROSITE_profiles:PS50102,hmmpanther:PTHR1   |  |
| benign(0.001)            | 5/5   | hmmpanther:PTHR23239,hmmpanther:P             |  |
| benign(0.015)            | 3/5   | hmmpanther:PTHR24217:SF9,hmmpantl             |  |
|                          | 4/8   | hmmpanther:PTHR10351:SF27,hmmpant             |  |
| benign(0.201)            | 6/16  | hmmpanther:PTHR13924                          |  |
|                          |       | 8/12                                          |  |
|                          |       | 6/9                                           |  |
|                          | 5/10  | hmmpanther:PTHR23179,hmmpanther:P             |  |
|                          |       | 18/18                                         |  |
|                          |       | 15/18                                         |  |
| benign(0.017)            | 3/8   | hmmpanther:PTHR10060,hmmpanther:P             |  |
|                          |       | 5/7                                           |  |
| benign(0.11)             | 3/13  | hmmpanther:PTHR22957,hmmpanther:PT            |  |
|                          |       | 1/20                                          |  |
| benign(0)                | 23/24 |                                               |  |
|                          |       | 18/26                                         |  |
|                          |       | 1/7                                           |  |
| probably_damaging(0.939) | 3/3   | 04538,hmmpanther:PTHR14754,hmmpanther:PT      |  |
| benign(0)                | 4/11  | hmmpanther:PTHR15141:SF37,hmmpant             |  |
|                          |       | 1/21                                          |  |
|                          | 9/9   |                                               |  |
|                          | 6/36  | ofiles:PS51192,hmmpanther:PTHR18934,hmmpan    |  |
|                          |       | 27/31                                         |  |
|                          |       | 23/28                                         |  |
|                          |       | 7/9                                           |  |
|                          |       | 3/8                                           |  |
|                          |       | 7/32                                          |  |
|                          |       | 9/11                                          |  |
|                          |       | 3/6                                           |  |
| probably_damaging(0.97)  | 5/7   | 11727,hmmpanther:PTHR11727:SF10,Gene3D:3.4    |  |
|                          | 1/1   | R12548:SF13,Gene3D:1.10.10.10,Pfam_domain:PF  |  |
|                          |       | 3/5                                           |  |
|                          |       | 4/16                                          |  |

VEP annotated somatic variants

|                                             |       |                                                                                                                                                                                                                        |
|---------------------------------------------|-------|------------------------------------------------------------------------------------------------------------------------------------------------------------------------------------------------------------------------|
| benign(0)                                   | 1/1   | _complexity_(Seg):seg,hmmpanther:PTHR11850,hmmpanther:PTHR11590,hmmpanther:PTHR11311,hmmpanther:PTHR10814,Gene3D:2.13/19,PROSITE_profiles:PS01180,hmmpanther:PTHR19/20,0127:SF613,Pfam_domain:PF00431,Gene3D:2.6049/57 |
|                                             | 6/13  |                                                                                                                                                                                                                        |
|                                             | 6/28  |                                                                                                                                                                                                                        |
|                                             | 2/2   |                                                                                                                                                                                                                        |
|                                             | 2/2   |                                                                                                                                                                                                                        |
|                                             | 6/6   |                                                                                                                                                                                                                        |
|                                             | 1/4   |                                                                                                                                                                                                                        |
|                                             | 16/20 |                                                                                                                                                                                                                        |
|                                             | 20/21 |                                                                                                                                                                                                                        |
|                                             | 19/21 |                                                                                                                                                                                                                        |
| benign(0)                                   | 1/3   | site_(Signalp):SignalP-noTM,hmmpanther:PTHR2234/40                                                                                                                                                                     |
|                                             | 1/4   |                                                                                                                                                                                                                        |
| benign(0.04)                                | 2/2   | am_domain:PF14985,hmmpanther:PTHR16103:SF7/7,4/6,3/4                                                                                                                                                                   |
|                                             | 6/6   |                                                                                                                                                                                                                        |
| benign(0.002)<br>benign(0.005)<br>benign(0) | 10/10 | Transmembrane_helices:TMI5/8,F_domain:PIRSF019548,hmmpanther:PTHR32163,hmmpanther:PTHR12505:SF21,hmmpanther:PTHR12583,hmmpanther:PTHR15321,hmmpanther:PTHR15321                                                        |
|                                             | 6/13  |                                                                                                                                                                                                                        |
|                                             | 9/28  |                                                                                                                                                                                                                        |
|                                             | 17/28 |                                                                                                                                                                                                                        |
|                                             | 16/27 |                                                                                                                                                                                                                        |
|                                             | 2/7   |                                                                                                                                                                                                                        |
|                                             | 2/9   |                                                                                                                                                                                                                        |
|                                             | 2/3   |                                                                                                                                                                                                                        |
|                                             | 4/4   |                                                                                                                                                                                                                        |
|                                             | 4/4   |                                                                                                                                                                                                                        |
| benign(0.415)                               | 12/18 | s:PS51156,hmmpanther:PTHR16089:SF19,hmmpanther:PTHR12932,hmmpanther:PTHR12932:SF2/5,2/5,2/5,3/5                                                                                                                        |
|                                             | 4/12  |                                                                                                                                                                                                                        |
|                                             | 5/6   |                                                                                                                                                                                                                        |
|                                             | 6/7   |                                                                                                                                                                                                                        |
|                                             | 3/9   |                                                                                                                                                                                                                        |
| benign(0.306)                               | 3/4   | ns:SM00449,Pfam_domain:PF00622,hmmpanther:PTHR31854                                                                                                                                                                    |
|                                             | 8/10  |                                                                                                                                                                                                                        |
|                                             | 5/9   |                                                                                                                                                                                                                        |

VEP annotated somatic variants

|                          |         |                                              |  |
|--------------------------|---------|----------------------------------------------|--|
|                          |         | 1/9                                          |  |
|                          | 29/57   | 10,hmmpanther:PTHR22826,hmmpanther:PTHR22    |  |
| benign(0.001)            | 1/9     | hmmpanther:PTHR24212,hmmpanther:P            |  |
|                          | 15/18   | hmmpanther:PTHR10631:SF3,hmmpantl            |  |
|                          |         | 13/13                                        |  |
|                          |         | 11/18                                        |  |
| possibly_damaging(0.61)  | 7/24    | 1/26                                         |  |
|                          |         | hmmpanther:PTHR13800,hmmpanther:P            |  |
|                          |         | 3/38                                         |  |
|                          |         | 3/14                                         |  |
| benign(0.001)            | 10/23   | Pfam_domain:PF04388,hmmpanther:              |  |
|                          |         | 14/22                                        |  |
|                          |         | 16/41                                        |  |
|                          |         | 1/8                                          |  |
| possibly_damaging(0.792) | 3/8     | PTHR19282,hmmpanther:PTHR19282:SF169,Pfam    |  |
|                          |         | 5/7                                          |  |
|                          |         | 1/1                                          |  |
|                          |         | 4/14                                         |  |
| benign(0.001)            | 13/15   |                                              |  |
|                          |         | 7/27                                         |  |
|                          |         | 9/9                                          |  |
| possibly_damaging(0.81)  | 2/23    | TE_profiles:PS50005,SMART_domains:SM00028,;  |  |
|                          |         | 37/57                                        |  |
|                          |         | 1/58                                         |  |
|                          |         | 18/57                                        |  |
|                          | 22/58   | hmmpanther:PTHR15977:SF13,hmmpant            |  |
|                          |         | 44/57                                        |  |
|                          | 8/11    | s:PS51221,hmmpanther:PTHR12241:SF31,hmmpa    |  |
|                          | 5/16    | _profiles:PS51221,hmmpanther:PTHR12241,hmmp  |  |
|                          |         | 11/12                                        |  |
|                          | 23/23   |                                              |  |
|                          |         | 18/24                                        |  |
|                          | 4/14    | _profiles:PS50294,hmmpanther:PTHR16517,hmmp  |  |
|                          |         | 5/13                                         |  |
|                          |         | 7/9                                          |  |
|                          |         | 8/9                                          |  |
|                          |         | 7/14                                         |  |
|                          |         | 4/13                                         |  |
|                          | 12/23   | panther:PTHR11254,hmmpanther:PTHR11254:SF    |  |
|                          | 106/106 |                                              |  |
|                          |         | 3/7                                          |  |
|                          |         | 4/6                                          |  |
|                          | 14/17   |                                              |  |
|                          |         | 4/15                                         |  |
|                          |         | 8/36                                         |  |
|                          |         | 14/21                                        |  |
| benign(0)                | 19/22   | TE_profiles:PS51034,hmmpanther:PTHR22962,hmi |  |
|                          |         | 15/21                                        |  |
|                          |         | 9/19                                         |  |
|                          |         | 4/14                                         |  |
|                          | 9/10    | 7,Gene3D:3.60.110.10,hmmpanther:PTHR23088:S  |  |
|                          |         | 4/6                                          |  |
| benign(0)                | 36/72   | ains:SM00060,Gene3D:2.60.40.10,hmmpanther:P1 |  |
|                          | 10/13   | hmmpanther:PTHR23347,hmmpanther:P            |  |



VEP annotated somatic variants

|                          |       |                                                                                                         |
|--------------------------|-------|---------------------------------------------------------------------------------------------------------|
|                          | 8/14  | panther:PTHR24006,hmmpanther:PTHR24006:SF6                                                              |
|                          | 4/21  | hmmpanther:PTHR24006,hmmpanther:PT<br>4/10<br>14/24                                                     |
|                          | 13/13 | 16/79<br>7/12<br>19/61<br>24/61<br>15/27<br>9/9                                                         |
| benign(0.004)            | 13/13 | mpanther:PTHR12011,hmmpanther:PTHR12011:S<br>5/15                                                       |
|                          | 6/6   | )):seg,Transmembrane_helices:TMhelix,hmmpanth                                                           |
|                          |       | 3/12                                                                                                    |
| possibly_damaging(0.711) | 6/6   | panther:PTHR10108,hmmpanther:PTHR10108:SF693<br>3/60<br>15/28                                           |
|                          | 6/29  | hmmpanther:PTHR14593                                                                                    |
|                          | 24/29 | 19/28<br>hmmpanther:PTHR14593                                                                           |
|                          |       | 26/28<br>25/30<br>13/13<br>11/17<br>1/18<br>17/24                                                       |
|                          | 6/6   | Coiled-coils_(Ncoils):Coil,Low_complex<br>10/14<br>8/12                                                 |
| unknown(0)               | 1/28  | _complexity_(Seg):seg,hmmpanther:PTHR13902,hi                                                           |
|                          | 5/5   |                                                                                                         |
| benign(0)                | 1/6   | Cleavage_site_(Signalp):SignalF<br>1/6<br>5/8<br>16/22                                                  |
|                          | 23/24 | :_profiles:PS50237,hmmpanther:PTHR11254,hmm<br>12/18                                                    |
|                          | 3/3   | 6/20<br>4/9                                                                                             |
|                          | 24/32 | panther:PTHR11223,hmmpanther:PTHR11223:SF3,!<br>hmmpanther:PTHR11370,hmmpanther:P<br>9/16<br>7/8<br>9/9 |
|                          | 1/10  |                                                                                                         |
|                          | 3/3   | hmmpanther:PTHR24399,hmmpanther:P<br>6/7<br>5/5<br>5/5                                                  |
|                          | 2/6   | 3/11<br>13/22                                                                                           |

VEP annotated somatic variants

|                          |       |                                               |
|--------------------------|-------|-----------------------------------------------|
| benign(0.194)            | 2/2   | im_domain:PF14893,hmmpanther:PTHR23095,hm     |
|                          | 3/12  | hmmpanther:PTHR12246,hmmpanther:P             |
|                          | 5/11  | her:PTHR22883,hmmpanther:PTHR22883:SF35,L     |
| benign(0)                |       | 3/8                                           |
|                          |       | 3/4                                           |
|                          | 9/10  | hmmpanther:PTHR24208,hmmpanther:P             |
|                          |       | 5/7                                           |
|                          | 11/11 |                                               |
| benign(0.002)            |       | 1/6                                           |
|                          |       | 11/11                                         |
|                          |       | 5/11                                          |
|                          |       | 8/23                                          |
|                          | 4/5   | hmmpanther:PTHR24409,hmmpanther:P             |
|                          | 4/4   | _profiles:PS50157,hmmpanther:PTHR24387,hmmj   |
|                          |       | 3/3                                           |
|                          |       | 5/7                                           |
|                          |       | 6/7                                           |
|                          |       | 4/4                                           |
| probably_damaging(0.997) | 5/5   | ,PROSITE_profiles:PS50157,hmmpanther:PTHR24   |
|                          |       | 1/3                                           |
|                          |       | 3/4                                           |
|                          |       | 3/3                                           |
|                          |       | 12/16                                         |
| possibly_damaging(0.865) | 11/14 | _complexity_(Seg):seg,hmmpanther:PTHR24402,hn |
| benign(0)                | 4/5   | _complexity_(Seg):seg,hmmpanther:PTHR22938,h  |
|                          | 1/4   | PS50805,hmmpanther:PTHR24381,hmmpanther:PT    |
| possibly_damaging(0.672) | 2/3   | panther:PTHR24384,hmmpanther:PTHR24384:SF1    |
| benign(0.008)            | 3/3   | hmmpanther:PTHR24402,hmmpanther:P             |
|                          | 4/4   | hmmpanther:PTHR24384:SF113,hmmpan             |
|                          |       | 2/4                                           |
| probably_damaging(0.981) | 7/7   | ofiles:PS50157,hmmpanther:PTHR23226,hmmpan    |
|                          | 3/3   | ;,PROSITE_profiles:PS50157,hmmpanther:PTHR2   |
|                          | 5/5   | ;,PROSITE_profiles:PS50157,hmmpanther:PTHR2   |
| benign(0.018)            | 8/8   | hmmpanther:PTHR16116                          |
|                          | 3/12  | hmmpanther:PTHR23343,hmmpanther:P             |
|                          |       | 2/2                                           |
|                          |       | 12/12                                         |
|                          |       | 31/54                                         |

VEP annotated somatic variants

| GMAF                                                                                                                                                                                                                                                                 | AFR_MAF                                                                                                                                                                                                                                                                   | AMR_MAF                                                                                                                                                                                                                                                         | ASN_MAF |
|----------------------------------------------------------------------------------------------------------------------------------------------------------------------------------------------------------------------------------------------------------------------|---------------------------------------------------------------------------------------------------------------------------------------------------------------------------------------------------------------------------------------------------------------------------|-----------------------------------------------------------------------------------------------------------------------------------------------------------------------------------------------------------------------------------------------------------------|---------|
| C:0.0196<br>G:0.3333<br>G:0.4714                                                                                                                                                                                                                                     | C:0.0008<br>C:0.9334                                                                                                                                                                                                                                                      | C:0.049<br>C:0.5634                                                                                                                                                                                                                                             |         |
| T:0.3009<br>G:0.4309<br>A:0.3862                                                                                                                                                                                                                                     | G:0.8737<br>G:0.1974<br>G:0.7526                                                                                                                                                                                                                                          | G:0.7637<br>G:0.5346<br>G:0.6398                                                                                                                                                                                                                                |         |
| ain:TIGR00957,Pfam_domain:PF00005,SMART_domains:SM00382,Superfamily_domains:SSF52540                                                                                                                                                                                 |                                                                                                                                                                                                                                                                           |                                                                                                                                                                                                                                                                 |         |
| T:0.3910                                                                                                                                                                                                                                                             | T:0.77                                                                                                                                                                                                                                                                    | T:0.4236                                                                                                                                                                                                                                                        |         |
| A:0.1575<br>T:0.1536<br>T:0.0168                                                                                                                                                                                                                                     | A:0.112<br>C:0.9244<br>T:0.0008                                                                                                                                                                                                                                           | A:0.1758<br>C:0.7925<br>T:0.013                                                                                                                                                                                                                                 |         |
| G:0.3187<br>T:0.0198<br>C:0.0863                                                                                                                                                                                                                                     | G:0.5998<br>T:0.0363<br>C:0.0356                                                                                                                                                                                                                                          | G:0.3602<br>T:0.0101<br>C:0.1081                                                                                                                                                                                                                                |         |
| A:0.0489<br>G:0.4329<br>A:0.2438<br>T:0.0399                                                                                                                                                                                                                         | A:0.0136<br>A:0.3964<br>A:0.2352<br>T:0.0136<br>T:0.2035                                                                                                                                                                                                                  | A:0.0072<br>A:0.6599<br>A:0.3199<br>T:0.0677<br>T:0.281                                                                                                                                                                                                         |         |
| T:0.1332<br>ATAA:0.3061<br>A:0.1601<br>G:0.4627                                                                                                                                                                                                                      | T:0.1921<br>ATAA:0.3427<br>A:0.0159<br>G:0.4047                                                                                                                                                                                                                           | T:0.1254<br>ATAA:0.3213<br>A:0.2046<br>G:0.5346                                                                                                                                                                                                                 |         |
| C:0.2975<br>G:0.0591<br>G:0.2175<br>-:0.0361<br>G:0.0595<br>C:0.3544<br>T:0.4327<br>A:0.0172<br>G:0.0248<br>C:0.3728<br>T:0.4581<br>C:0.0136<br>A:0.2680<br>C:0.3083<br>C:0.3289<br>T:0.2103<br>T:0.0044<br>T:0.1332<br>C:0.1989<br>T:0.3624<br>G:0.3738<br>C:0.1781 | T:0.5893<br>G:0.1225<br>G:0.2231<br>-:0.0023<br>G:0.062<br>C:0.7322<br>C:0.5378<br>A:0.0015<br>G:0.0053<br>C:0.3691<br>T:0.1566<br>C:0.0015<br>A:0.2973<br>C:0.2965<br>T:0.82<br>T:0.1331<br>T:0.0023,T:0.0023<br>T:0.0151<br>C:0.1067<br>T:0.466<br>G:0.5076<br>T:0.8245 | T:0.7061<br>G:0.0259<br>G:0.2248<br>-:0.0202<br>G:0.0836<br>C:0.1671<br>C:0.6715<br>A:0.0202<br>G:0.049<br>C:0.2738<br>T:0.585<br>C:0.0259<br>A:0.2622<br>C:0.255<br>T:0.6354<br>T:0.2507<br>T:0,T:0<br>T:0.1916<br>C:0.2334<br>T:0.3559<br>G:0.3573<br>T:0.817 |         |

VEP annotated somatic variants

|          |          |          |
|----------|----------|----------|
| A:0.1709 | A:0.2163 | A:0.2032 |
| A:0.1947 | A:0.0136 | A:0.2349 |
| T:0.1569 | T:0.1619 | T:0.1196 |
| C:0.3782 | C:0.2912 | C:0.3905 |
| T:0.0737 | T:0.0507 | T:0.0274 |
| T:0.4569 | C:0.3949 | C:0.5014 |
| A:0.1981 | G:0.9244 | G:0.7954 |
| T:0.1450 | T:0.0325 | T:0.1643 |
| G:0.1967 | G:0.0787 | G:0.3084 |
| -:0.2610 | -:0.4539 | -:0.2507 |
| A:0.2875 | A:0.3048 | A:0.2565 |
| A:0.1096 | A:0.1672 | A:0.072  |
| C:0.1941 | C:0.1679 | C:0.2104 |
| T:0.1348 | C:0.8684 | C:0.7262 |
| G:0.2756 | G:0.2897 | G:0.1715 |
| A:0.0365 | A:0.0023 | A:0.0692 |
| T:0.0317 | T:0.0015 | T:0.0519 |
| T:0.0130 | T:0.0008 | T:0.0173 |

|          |          |          |
|----------|----------|----------|
| C:0.1492 | C:0.1112 | C:0.085  |
| C:0.0018 | C:0.0015 | C:0.0058 |

01602,PIRSF\_domain:PIRSF037097,Superfamily\_domains:SSF48371

|          |          |          |
|----------|----------|----------|
| T:0.0833 | T:0.0431 | T:0.0778 |
| G:0.1999 | G:0.1989 | G:0.3242 |
| G:0.2161 | G:0.2549 | G:0.3256 |
| G:0.2061 | G:0.034  | G:0.1052 |
| T:0.0260 | T:0.0015 | T:0.0836 |
| G:0.0395 | G:0.0068 | G:0.0461 |
| G:0.2821 | G:0.4372 | G:0.2781 |
| C:0.2381 | C:0.2799 | C:0.2579 |
| T:0.0204 | T:0.0015 | T:0.0202 |
| T:0.0487 | T:0.062  | T:0.0259 |
| G:0.3181 | A:0.388  | A:0.7536 |
| G:0.0663 | G:0.0552 | G:0.0548 |
| C:0.4147 | C:0.5688 | C:0.487  |
| C:0.2488 | C:0.025  | C:0.1225 |
| G:0.3686 | G:0.5287 | G:0.3415 |
| A:0.0278 | A:0.0015 | A:0.0476 |
| C:0.3419 | T:0.7065 | T:0.7046 |
| C:0.3401 | T:0.6558 | T:0.4914 |
| A:0.3807 | G:0.5537 | G:0.4798 |
| A:0.4411 | A:0.1604 | A:0.4207 |
| T:0.4411 | T:0.1657 | T:0.4121 |
| G:0.0966 | G:0.0446 | G:0.1311 |
| A:0.1667 | A:0.2383 | A:0.0994 |
| A:0.1619 | A:0.2163 | A:0.0994 |
| A:0.0190 | A:0.003  | A:0.0231 |
| T:0.2262 | T:0.2995 | T:0.2896 |
| G:0.1146 | G:0.0136 | G:0.1671 |
| -:0.0272 | -:0.0151 | -:0.0187 |

VEP annotated somatic variants

|          |          |          |
|----------|----------|----------|
| A:0.4960 | A:0.1551 | A:0.5591 |
| T:0.4079 | T:0.3661 | T:0.4654 |
| A:0.3584 | A:0.202  | A:0.4625 |
| G:0.3998 | G:0.3162 | G:0.4726 |
| C:0.2157 | C:0.0666 | C:0.0793 |
| G:0.2426 | A:0.8071 | A:0.7277 |
| G:0.1867 | G:0.3124 | G:0.2565 |
| C:0.0244 | C:0.0325 | C:0.0331 |
| A:0.1464 | A:0.0893 | A:0.281  |
| A:0.0347 | A:0.084  | A:0.0159 |
| T:0.0631 | T:0.0045 | T:0.1182 |
| G:0.3770 | G:0.2436 | G:0.3314 |
| G:0.1060 | G:0.174  | G:0.1023 |
| T:0.2001 | T:0.0802 | T:0.281  |
| A:0.3144 | A:0.2867 | A:0.1916 |
| A:0.1639 | A:0.1808 | A:0.1873 |
| A:0.2135 | A:0.177  | A:0.3026 |
| G:0.3888 | G:0.472  | G:0.3184 |
| T:0.3027 | T:0.2277 | T:0.1888 |
| C:0.0323 | T:0.7337 | T:0.7233 |
| G:0.4003 | G:0.1293 | G:0.4179 |
| C:0.2129 | C:0.2882 | C:0.2435 |
| C:0.3894 | C:0.6634 | C:0.2939 |
| G:0.2600 | A:0.8941 | A:0.7666 |
| T:0.1715 | T:0.2005 | T:0.1354 |
| G:0.4936 | A:0.584  | A:0.4726 |
| G:0.0825 | G:0.0265 | G:0.0778 |
| C:0.0363 | C:0.053  | C:0.0346 |
| T:0.1648 | T:0.1747 | T:0.2867 |
| T:0.0286 | T:0.0038 | T:0.049  |
| A:0.2192 | A:0.0893 | A:0.415  |
| G:0.0283 | G:0.003  | G:0.0202 |
| A:0.1757 | A:0.0469 | A:0.1671 |
| T:0.0004 | T:0      | T:0      |
| T:0.3425 | T:0.2179 | T:0.2925 |
| T:0.3069 | T:0.1611 | T:0.3084 |
| C:0.3534 | C:0.2194 | C:0.3746 |
| T:0.1859 | T:0.2746 | T:0.2176 |
| T:0.0469 | T:0.0136 | T:0.0648 |
| A:0.2151 | A:0.3003 | A:0.2176 |
| G:0.0417 | G:0.0401 | G:0.0159 |
| C:0.1947 | C:0.2095 | C:0.098  |
| T:0.1889 | T:0.2095 | T:0.0908 |
| T:0.1673 | T:0.0151 | T:0.1988 |
| A:0.0958 | A:0.0113 | A:0.0764 |
| G:0.3303 | T:0.5431 | T:0.781  |
| G:0.2825 | G:0.3064 | G:0.2738 |

VEP annotated somatic variants

|          |                   |                   |
|----------|-------------------|-------------------|
| C:0.3037 | C:0.1316          | C:0.3818          |
| A:0.4914 | A:0.3215          | A:0.4654          |
| A:0.1330 | A:0.0144          | A:0.0836          |
| C:0.0242 | C:0.0023          | C:0.049           |
| T:0.3688 | T:0.3707          | T:0.3069          |
| -:0.1901 | -:0.323           | -:0.0893          |
| -:0.0681 | -:0.1619          | -:0.0259          |
| A:0.0751 | A:0.115           | A:0.062           |
| T:0.4659 | C:0.767           | C:0.4986          |
| T:0.3486 | C:0.5923          | C:0.5389          |
| C:0.3415 | C:0.174           | C:0.3934          |
| T:0.1475 | T:0.0068,T:0.0068 | T:0.1138,T:0.1138 |
| G:0.2720 | G:0.4289          | G:0.2464          |
| -:0.1136 | -:0.2526          | -:0.0836          |
| C:0.1538 | C:0.3124          | C:0.098           |
| C:0.1719 | C:0.0666          | C:0.1787          |
| C:0.3610 | C:0.3419          | C:0.3934          |
|          |                   |                   |
| G:0.2680 | T:0.7095          | T:0.7695          |
|          |                   |                   |
| G:0.0541 | G:0.0159          | G:0.036           |
| C:0.3057 | C:0.649           | C:0.1383          |
| C:0.4858 | C:0.8404          | C:0.3991          |
| T:0.0000 | T:0               | T:0               |
| G:0.2865 | G:0.1944          | G:0.2464          |
| A:0.0074 | A:0.0015          | A:0.0231          |
| T:0.0006 | T:0.0008          | T:0               |
|          |                   |                   |
| C:0.4215 | C:0.6263          | C:0.134           |
| T:0.0092 | T:0.0008          | T:0.0086          |
|          |                   |                   |
| G:0.0723 | G:0.0076          | G:0.0821          |
| C:0.0707 | C:0.0666          | C:0.1037          |
| C:0.0004 | C:0               | C:0               |
| T:0.1849 | T:0.0378          | T:0.4078          |
|          |                   |                   |
| A:0.0054 | A:0               | A:0.013           |
| A:0.3488 | A:0.5439          | A:0.3573          |
| T:0.2402 | T:0.4675          | T:0.1729          |
| T:0.0741 | T:0.0862          | T:0.0994          |
| C:0.4814 | T:0.5787          | T:0.4135          |
| T:0.3061 | T:0.3245          | T:0.4222          |
| T:0.0032 | T:0               | T:0               |
| C:0.2897 | C:0.3767          | C:0.2118          |
| A:0.3139 | A:0.18            | A:0.268           |
| T:0.2680 | T:0.1044          | T:0.255           |
| C:0.1581 | C:0.1036          | C:0.1499          |
|          |                   |                   |
| G:0.2806 | G:0.0847          | G:0.3761          |
| T:0.0425 | T:0.0053,T:0.0053 | T:0.062,T:0.062   |
| T:0.0060 | T:0.0008          | T:0.0029          |
| -:0.3093 | -:0.3094          | -:0.4524          |
| A:0.3143 | A:0.0666          | A:0.4496          |

VEP annotated somatic variants

|                                            |            |            |
|--------------------------------------------|------------|------------|
| A:0.2965                                   | A:0.3752   | A:0.2305   |
| G:0.0004                                   | G:0        | G:0        |
| C:0.0645                                   | C:0.1944   | C:0.0375   |
| G:0.0002                                   | G:0        | G:0        |
| 361,hmmpanther:PTHR13140                   |            |            |
| T:0.1472                                   | T:0.1362   | T:0.0922   |
| A:0.1160                                   | A:0.2156   | A:0.1138   |
| A:0.1110                                   | A:0.0552   | A:0.1268   |
| A:0.1494                                   | A:0.0908   | A:0.1052   |
| T:0.1326                                   | T:0.0121   | T:0.1859   |
| A:0.0441                                   | A:0.0053   | A:0.098    |
| G:0.3724                                   | G:0.4675   | G:0.4049   |
| :-0.1679                                   | :-0.0953   | :-0.2133   |
| A:0.4968                                   | G:0.3449   | G:0.598    |
| :-0.2812                                   | :-0.5983   | :-0.2147   |
| C:0.2867                                   | C:0.3109   | C:0.2233   |
| G:0.1164                                   | G:0.034    | G:0.2666   |
| ty_(Seg):seg,Transmembrane_helices:TMhelix |            |            |
| T:0.0002                                   | T:0        | T:0        |
| T:0.3716                                   | C:0.6286   | C:0.6138   |
| T:0.2883                                   | T:0.0197   | T:0.3905   |
| T:0.2680                                   | C:0.5499   | C:0.7594   |
| C:0.3015                                   | C:0.1967   | C:0.3458   |
| A:0.0092                                   | A:0.0008   | A:0.0159   |
| G:0.1879                                   | G:0.239    | G:0.1369   |
| G:0.0003                                   | G:0.0008   | G:0        |
| A:0.0853                                   | A:0.2905   | A:0.0476   |
|                                            | A:0.1717   | A:0.2565   |
|                                            | G:0.6172   | G:0.4035   |
| A:0.0098                                   | A:0        | A:0.013    |
| :-0.4427                                   | AAG:0.8873 | AAG:0.4957 |
| C:0.3251                                   | T:0.5106   | T:0.7161   |
| C:0.2390                                   | C:0.2186   | C:0.2104   |
| A:0.2039                                   | A:0.152    | A:0.2205   |
| C:0.2478                                   | C:0.0567   | C:0.4409   |
| C:0.2260                                   | C:0.1596   | C:0.2233   |
| :-0.2771                                   | :-0.1959   | :-0.2061   |
| T:0.0515                                   | T:0.025    | T:0.0735   |
| T:0.0012                                   | T:0        | T:0        |
| T:0.3177                                   | C:0.5794   | C:0.7795   |
| C:0.2913                                   | T:0.59     | T:0.7882   |
| C:0.3093                                   | T:0.5923   | T:0.7061   |
| G:0.3852                                   | G:0.7088   | G:0.2233   |
| C:0.2666                                   | T:0.6377   | T:0.7666   |
| A:0.1861                                   | A:0.2496   | A:0.1513   |
| G:0.2821                                   |            |            |
| A:0.1348                                   | A:0.0817   | A:0.1671   |

VEP annotated somatic variants

|          |          |          |
|----------|----------|----------|
| C:0.2530 | C:0.1884 | C:0.2767 |
| T:0.0727 | T:0.0303 | T:0.0634 |
| C:0.3057 | C:0.0953 | C:0.3501 |
| A:0.1534 | A:0.3011 | A:0.0908 |
| T:0.4217 | T:0.3631 | T:0.3761 |
| A:0.2640 | A:0.0666 | A:0.2478 |
| T:0.2003 | T:0.2867 | T:0.1974 |
| G:0.1907 | C:0.7504 | C:0.5994 |
| C:0.0118 | C:0      | C:0.013  |
| A:0.0533 | A:0.0809 | A:0.0447 |
|          | C:0.4372 | C:0.1268 |
| G:0.3542 | G:0.447  | G:0.268  |
| T:0.1823 | T:0.0272 | T:0.1095 |
| G:0.1364 | A:0.8048 | A:0.9222 |
| A:0.4704 | A:0.1445 | A:0.5432 |
| A:0.4852 | A:0.6687 | A:0.2983 |
| G:0.4028 | G:0.3033 | G:0.4409 |
| T:0.1294 | T:0.0287 | T:0.147  |
| A:0.4706 | A:0.8411 | A:0.3963 |
| C:0.3602 | C:0.413  | C:0.304  |
| G:0.2214 | G:0.1399 | G:0.2925 |
| G:0.0653 | G:0.0393 | G:0.0461 |
| T:0.0030 | T:0.0045 | T:0.0043 |
| A:0.4333 | G:0.621  | G:0.4481 |
| G:0.2027 | G:0.0772 | G:0.2622 |
| A:0.4904 | A:0.5159 | A:0.5562 |
| C:0.3117 | C:0.2829 | C:0.3991 |
| A:0.1851 | A:0.1808 | A:0.072  |
| A:0.3211 | A:0.3404 | A:0.3184 |
| C:0.3955 | C:0.1974 | C:0.3847 |
| T:0.4884 | C:0.3321 | C:0.6715 |
| G:0.2969 | G:0.1702 | G:0.2954 |
| G:0.2099 | G:0.4455 | G:0.1412 |
| T:0.0080 |          |          |
| A:0.1230 | A:0.0325 | A:0.1715 |
| G:0.0491 | G:0.0643 | G:0.0562 |
| A:0.2774 | A:0.0522 | A:0.3199 |
| G:0.0060 | G:0.0008 | G:0.0014 |
| C:0.0002 | C:0      | C:0      |
| A:0.2995 | A:0.233  | A:0.2867 |
| T:0.1554 | T:0.2413 | T:0.0634 |
| T:0.0028 | T:0      | T:0.0058 |
| C:0.4744 | C:0.2526 | C:0.5043 |
| T:0.4605 | T:0.202  | T:0.5    |



VEP annotated somatic variants

|                                                              |           |           |
|--------------------------------------------------------------|-----------|-----------|
| G:0.3944                                                     | G:0.2723  | G:0.5303  |
| A:0.3444                                                     | A:0.1097  | A:0.3429  |
| T:0.1392                                                     | T:0.0356  | T:0.2277  |
| T:0.4700                                                     | C:0.888   | C:0.3818  |
| T:0.1983                                                     | T:0.0166  | T:0.3228  |
| A:0.0643                                                     | A:0.0113  | A:0.0274  |
| G:0.3650                                                     | G:0.4228  | G:0.3646  |
| G:0.0034                                                     | G:0       | G:0       |
| G:0.2248                                                     | G:0.4728  | G:0.1556  |
| 1.10.260.40,Pfam_domain:PF02376,Superfamily_domains:SSF47413 |           |           |
| A:0.3916                                                     | T:0.615   | T:0.4222  |
| C:0.3934                                                     | T:0.6142  | T:0.4193  |
| A:0.1146                                                     | A:0.1604  | A:0.1369  |
|                                                              |           |           |
| A:0.0681                                                     | A:0.034   | A:0.049   |
| G:0.2027                                                     | G:0.3707  | G:0.2622  |
| T:0.2314                                                     | T:0.4743  | T:0.2738  |
|                                                              |           |           |
| T:0.2057                                                     | T:0.3139  | T:0.2161  |
| C:0.3990                                                     | A:0.8359  | A:0.4957  |
| A:0.3001                                                     | A:0.2269  | A:0.3213  |
| T:0.3231                                                     | C:0.9183  | C:0.6268  |
| A:0.4177                                                     | G:0.4599  | G:0.7017  |
| A:0.4675                                                     | C:0.7474  | C:0.513   |
| C:0.1737                                                     | C:0.2587  | C:0.1167  |
| A:0.1262                                                     | A:0.1029  | A:0.1052  |
| G:0.1617                                                     | G:0.0431  | G:0.2277  |
| A:0.1164                                                     | A:0.1218  | A:0.1182  |
|                                                              |           |           |
| G:0.3107                                                     | G:0.5182  | G:0.1974  |
| C:0.0004                                                     | C:0       | C:0       |
| T:0.3658                                                     | C:0.7103  | C:0.6066  |
| T:0.0449                                                     | T:0.0061  | T:0.0735  |
| A:0.4317                                                     | C:0.2965  | C:0.6297  |
| G:0.3752                                                     | G:0.2103  | G:0.464   |
|                                                              |           |           |
| A:0.4301                                                     | A:0.5711  | A:0.4063  |
|                                                              |           |           |
| T:0.3914                                                     | T:0.1036  | T:0.4856  |
| TG:0.3355                                                    | TG:0.2118 | TG:0.2723 |
| T:0.4073                                                     | T:0.562   | T:0.2421  |
| C:0.2931                                                     | C:0.388   | C:0.2421  |
| G:0.2254                                                     | G:0.1407  | G:0.2363  |
| A:0.2264                                                     | A:0.143   | A:0.2363  |
| C:0.0002                                                     | C:0       | C:0       |
|                                                              |           |           |
| -:0.1394                                                     | -:0.0666  | -:0.1297  |
| G:0.3446                                                     | G:0.2057  | G:0.3559  |
| T:0.2312                                                     | T:0.23    | T:0.3516  |
| A:0.3450                                                     | A:0.8101  | A:0.1354  |
| G:0.0621                                                     | G:0.143   | G:0.0259  |
| A:0.4238                                                     | G:0.618   | G:0.438   |
| T:0.0012                                                     | T:0.0008  | T:0.0014  |
| T:0.0735                                                     | T:0.034   | T:0.0648  |

VEP annotated somatic variants

|               |          |          |
|---------------|----------|----------|
| T:0.3247      | T:0.4092 | T:0.281  |
| G:0.1308      | G:0.0068 | G:0.2089 |
| G:0.4900      | G:0.4448 | G:0.4841 |
| T:0.3381      | T:0.1581 | T:0.3862 |
| G:0.3385      | G:0.1127 | G:0.3948 |
| G:0.3257      | G:0.1142 | G:0.3804 |
| G:0.0290      | G:0.003  | G:0.0259 |
| G:0.0292      | G:0.003  | G:0.0259 |
| T:0.3255      |          |          |
| C:0.2109      | C:0.0356 | C:0.2594 |
| C:0.0230      | C:0.0023 | C:0.0202 |
| A:0.0116      | A:0.0015 | A:0.0144 |
| G:0.4828      | G:0.5537 | G:0.4683 |
| T:0.1418      | T:0.0938 | T:0.2392 |
| A:0.1240      | A:0.2337 | A:0.0692 |
| C:0.2418      | C:0.0772 | C:0.3343 |
| A:0.1715      | C:0.9766 | C:0.7651 |
| T:0.0942      | T:0.0825 | T:0.1326 |
| A:0.0451      | A:0.0038 | A:0.0274 |
| T:0.2808      | T:0.2564 | T:0.2104 |
| C:0.2792      | C:0.261  | C:0.1916 |
| A:0.4199      | A:0.6082 | A:0.2248 |
| A:0.2099      | A:0.1188 | A:0.2089 |
| :-0.0070      | :-0      | :-0.0101 |
| C:0.2568      | A:0.6672 | A:0.696  |
| T:0.1216      | T:0.121  | T:0.0821 |
| T:0.0126      | T:0.0008 | T:0.0317 |
| A:0.4758      | A:0.4213 | A:0.5331 |
| C:0.0042      | C:0.0008 | C:0.0086 |
| A:0.2256      | A:0.1256 | A:0.2767 |
| C:0.4876      | C:0.7943 | C:0.487  |
| C:0.2175      | C:0.3873 | C:0.2406 |
| A:0.0525      | A:0.0197 | A:0.0793 |
| C:0.4357      | C:0.2655 | C:0.6081 |
| G:0.1424      | G:0.1309 | G:0.1513 |
| ref:PTHR14207 |          |          |
| A:0.0286      | A:0.0038 | A:0.0317 |
| G:0.3141      | G:0.1785 | G:0.3761 |
| A:0.0467      | A:0.0091 | A:0.0807 |
| C:0.4457      | T:0.5061 | T:0.5418 |
| T:0.3562      | T:0.0401 | T:0.5    |
| T:0.1689      | T:0.1876 | T:0.1542 |
| T:0.4908      | C:0.7799 | C:0.5072 |
| G:0.0102      | G:0      | G:0.0288 |
| :-0.1777      | :-0.1838 | :-0.1455 |
| A:0.2420      | A:0.0257 | A:0.2248 |

VEP annotated somatic variants

|                                                                                   |          |          |
|-----------------------------------------------------------------------------------|----------|----------|
| T:0.1054                                                                          | T:0.0076 | T:0.1988 |
| T:0.0078                                                                          | T:0.0015 | T:0.0187 |
| A:0.3319                                                                          | G:0.8502 | G:0.5807 |
| T:0.3632                                                                          | T:0.0877 | T:0.4625 |
| T:0.2045                                                                          | T:0.0348 | T:0.317  |
| A:0.4177                                                                          | A:0.4289 | A:0.6556 |
| T:0.3990                                                                          | T:0.4924 | T:0.5403 |
| G:0.4461                                                                          | G:0.6135 | G:0.6225 |
| T:0.2163                                                                          | T:0.1036 | T:0.2421 |
|                                                                                   |          |          |
| C:0.4277                                                                          | G:0.7315 | G:0.5101 |
| A:0.3033                                                                          | T:0.8457 | T:0.5432 |
| A:0.3035                                                                          | G:0.8449 | G:0.5447 |
| T:0.3359                                                                          | C:0.9259 | C:0.621  |
| G:0.4445                                                                          | C:0.6876 | C:0.5548 |
| A:0.4425                                                                          | G:0.6921 | G:0.5576 |
| T:0.0631                                                                          | T:0.028  | T:0.183  |
| G:0.4860                                                                          | G:0.4259 | G:0.4885 |
|                                                                                   |          |          |
| C:0.0092                                                                          | C:0.0008 | C:0.0086 |
| T:0.1188                                                                          | T:0.0045 | T:0.0922 |
| T:0.0020                                                                          | T:0.0068 | T:0.0014 |
| A:0.1695                                                                          | A:0.5091 | A:0.0908 |
| G:0.2155                                                                          | G:0.3533 | G:0.1427 |
| T:0.0627                                                                          | T:0.084  | T:0.0807 |
| A:0.2157                                                                          | A:0.18   | A:0.2723 |
| A:0.3662                                                                          | G:0.4032 | G:0.6009 |
| A:0.3780                                                                          | A:0.0514 | A:0.5447 |
| A:0.0505                                                                          | A:0.0015 | A:0.0331 |
| A:0.4197                                                                          | A:0.472  | A:0.451  |
| T:0.1524                                                                          | T:0.177  | T:0.085  |
| T:0.0577                                                                          | T:0.0061 | T:0.0807 |
| T:0.4203                                                                          | T:0.1672 | T:0.5159 |
| T:0.4293                                                                          | T:0.2156 | T:0.4971 |
| T:0.1438                                                                          | T:0.1505 | T:0.1383 |
| T:0.0092                                                                          | T:0.0008 | T:0.0159 |
|                                                                                   |          |          |
| A:0.3516                                                                          | A:0.4781 | A:0.3876 |
|                                                                                   |          |          |
| C:0.1024                                                                          | C:0.1536 | C:0.0735 |
| 7,PIRSF_domain:PIRSF000354                                                        | T:0.09   | T:0.0648 |
| 4265,hmmpanther:PTHR24265:SF23,SMART_domains:SM00020,Superfamily_domains:SSF50494 |          |          |
| A:0.4344                                                                          | A:0.4735 | A:0.3184 |
| G:0.1344                                                                          | G:0.0174 | G:0.3199 |
| G:0.2320                                                                          | G:0.0582 | G:0.4597 |
| G:0.4159                                                                          | G:0.2821 | G:0.2752 |
| G:0.4744                                                                          | A:0.8411 | A:0.3905 |
|                                                                                   |          |          |
| G:0.3287                                                                          | C:0.5666 | C:0.4611 |
| T:0.2803                                                                          | T:0.2179 | T:0.2594 |
| C:0.0990                                                                          | C:0.093  | C:0.0937 |
| A:0.0052                                                                          | A:0.0008 | A:0.0072 |
| A:0.0531                                                                          | A:0.0212 | A:0.1239 |

VEP annotated somatic variants

|                                                                  |                   |                   |
|------------------------------------------------------------------|-------------------|-------------------|
| C:0.3598                                                         | T:0.8949          | T:0.5778          |
| T:0.3502                                                         | G:0.5325          | G:0.7003          |
| G:0.0174                                                         | G:0               | G:0.0115          |
| A:0.4681                                                         | A:0.6218          | A:0.3012          |
| G:0.2400                                                         | G:0.1906          | G:0.3285          |
| G:0.1775                                                         | A:0.7254          | A:0.8833          |
| G:0.3902                                                         | G:0.1762          | G:0.4121          |
| T:0.0144                                                         | T:0.0015          | T:0.036           |
| A:0.2234                                                         | G:0.888           | G:0.817           |
| A:0.2809                                                         | G:0.8843,G:0.8843 | G:0.7839,G:0.7839 |
| A:0.2220                                                         | C:0.8911,C:0.8911 | C:0.817,C:0.817   |
| C:0.4435                                                         | C:0.3601          | C:0.3545          |
| C:0.2107                                                         | C:0.0946          | C:0.1153          |
| T:0.2280                                                         | T:0.1157          | T:0.1398          |
| A:0.0651                                                         | A:0.0098          | A:0.0965          |
| A:0.0837                                                         | A:0.0189          | A:0.1081          |
| A:0.0859                                                         | A:0.0272          | A:0.1081          |
| T:0.1767                                                         | T:0.2988          | T:0.134           |
| T:0.0002                                                         | T:0.0008          | T:0               |
| C:0.0541                                                         | C:0.0068          | C:0.0663          |
| A:0.4331                                                         | A:0.6377          | A:0.4654          |
| A:0.2490                                                         | A:0.1974          | A:0.2262          |
| A:0.3425                                                         | A:0.3116          | A:0.3919          |
| G:0.2356                                                         | G:0.5787          | G:0.1254          |
| A:0.0002                                                         | A:0               | A:0               |
| T:0.3367                                                         | T:0.2398          | T:0.3631          |
| T:0.3498                                                         | T:0.6868          | T:0.3501          |
| G:0.4261                                                         | A:0.5696          | A:0.536           |
| A:0.2995                                                         | A:0.1097          | A:0.3098          |
| G:0.2991                                                         | A:0.8101          | A:0.5159          |
| C:0.3125                                                         | C:0.2663          | C:0.4452          |
| T:0.3195                                                         | T:0.1505          | T:0.4452          |
| C:0.4289                                                         | T:0.7247          | T:0.6066          |
| T:0.0156                                                         | T:0.0038          | T:0.0288          |
| A:0.0477                                                         | A:0.003           | A:0.1124          |
| A:0.4339                                                         | A:0.5628          | A:0.2392          |
| A:0.0042                                                         | A:0               | A:0.0058          |
| G:0.2021                                                         | G:0.3222          | G:0.2017          |
| -:0.3598                                                         | GGTTACCCTA:0.5582 | GGTTACCCTA:0.7853 |
| C:0.2053                                                         | C:0.0673          | C:0.3761          |
| G:0.3758                                                         |                   |                   |
| T:0.1416                                                         | T:0.0651          | T:0.2334          |
| -:0.3438                                                         | -:0.084           | -:0.317           |
| T:0.3446                                                         | T:0.0847          | T:0.317           |
| C:0.3578                                                         | T:0.5416          | T:0.6816          |
| G:0.4934                                                         | G:0.295           | G:0.6542          |
| C:0.2173                                                         | C:0.1649          | C:0.2291          |
| A:0.3271                                                         | A:0.5318          | A:0.2637          |
| C:0.4930                                                         | C:0.5045          | C:0.4683          |
| M00261,Superfamily_domains:SSF57184,Superfamily_domains:SSF57184 |                   |                   |
| G:0.2766                                                         | G:0.0651          | G:0.438           |

VEP annotated somatic variants

|          |          |          |
|----------|----------|----------|
| T:0.2913 | T:0.1422 | T:0.4424 |
| A:0.1563 | A:0.1808 | A:0.232  |
| T:0.2666 | T:0.0825 | T:0.4294 |
| T:0.2626 | T:0.2769 | T:0.353  |
| T:0.1030 | T:0.1891 | T:0.0634 |
| A:0.2448 | A:0.1467 | A:0.3055 |
| T:0.0044 | T:0.0008 | T:0.0058 |
| T:0.3427 | A:0.9236 | A:0.5576 |
| C:0.3229 | C:0.27   | C:0.3213 |
| C:0.4687 | C:0.2443 | C:0.5317 |
| T:0.4671 | C:0.2095 | C:0.6427 |
| T:0.2119 | T:0.1725 | T:0.1787 |
| T:0.3522 | T:0.3434 | T:0.3084 |
| -:0.1192 | -:0.0885 | -:0.0634 |
| A:0.4888 | A:0.1808 | A:0.6052 |
| G:0.0781 | G:0.0174 | G:0.1643 |
| T:0.0092 | T:0.0015 | T:0.0187 |
| G:0.2760 | G:0.1899 | G:0.2954 |
| T:0.1983 | T:0.1407 | T:0.1844 |
| G:0.3820 | G:0.4977 | G:0.415  |
| T:0.3297 | T:0.2466 | T:0.4251 |
| C:0.0972 | C:0.2716 | C:0.0476 |
| A:0.0613 | A:0.174  | A:0.0346 |
| T:0.0487 | T:0.1286 | T:0.0303 |
| A:0.1308 | A:0.0303 | A:0.1282 |
| T:0.1428 | T:0.0371 | T:0.1441 |
| A:0.1436 | A:0.0371 | A:0.1441 |
| T:0.1262 | T:0.0825 | T:0.2378 |
| G:0.0511 | G:0.0121 | G:0.062  |
| G:0.3091 | G:0.1074 | G:0.2781 |
| G:0.3924 | G:0.438  | G:0.4899 |
| C:0.1146 | C:0.208  | C:0.062  |
| G:0.2069 | G:0.0825 | G:0.2061 |
| G:0.0008 | G:0      | G:0.0014 |
| T:0.1645 | T:0.0129 | T:0.1787 |
| G:0.2294 | G:0.1437 | G:0.2522 |
| A:0.1204 | A:0.0068 | A:0.1398 |
| A:0.0212 | A:0.0015 | A:0.0591 |
| A:0.0064 | A:0      | A:0.0072 |
| A:0.2310 | A:0.0908 | A:0.4035 |
| A:0.1118 | A:0.0552 | A:0.1643 |
| A:0.2556 | A:0.2474 | A:0.3084 |
| G:0.4353 | A:0.6974 | A:0.4769 |
| T:0.0132 | C:0.7579 | C:0.745  |
| G:0.0535 | G:0.0204 | G:0.0562 |
| A:0.1208 | A:0.0053 | A:0.1153 |
| C:0.3363 | C:0.2958 | C:0.3242 |
| A:0.3185 | T:0.9418 | T:0.683  |
| T:0.2440 | T:0.1286 | T:0.3516 |
| T:0.1440 | T:0.0197 | T:0.1758 |
| A:0.0665 | A:0.087  | A:0.0908 |
| A:0.2939 | A:0.2958 | A:0.2839 |

VEP annotated somatic variants

|              |          |          |
|--------------|----------|----------|
| C:0.1875     | C:0.2262 | C:0.2075 |
| A:0.1595     | A:0.1051 | A:0.0908 |
| A:0.4069     | G:0.7549 | G:0.4683 |
| THR21231:SF7 |          |          |
| A:0.2321     | A:0.0113 | A:0.147  |
| G:0.3806     | C:0.8079 | C:0.5072 |
| T:0.0072     | T:0.0008 | T:0.0159 |
| A:0.3816     | A:0.2466 | A:0.3357 |
| A:0.3003     | A:0.2496 | A:0.3127 |
| G:0.1170     | G:0.1498 | G:0.0749 |
| C:0.2418     | C:0.0719 | C:0.2392 |
| A:0.1803     | A:0.2042 | A:0.1571 |
| C:0.4696     | A:0.6846 | A:0.5793 |
| T:0.1791     | T:0.2194 | T:0.1499 |
| A:0.0040     | A:0.0008 | A:0.0058 |
|              |          |          |
| G:0.3407     | A:0.4841 | A:0.7522 |
| A:0.1076     | A:0.0129 | A:0.0865 |
| T:0.1703     | T:0.0552 | T:0.2565 |
| C:0.0655     | C:0.0136 | C:0.1196 |
| T:0.0555     | T:0.1415 | T:0.0303 |
| C:0.2223     | T:0.5378 | T:0.6297 |
| T:0.2482     | T:0.2784 | T:0.2133 |
| T:0.0090     | T:0.003  | T:0.0058 |
| T:0.0733     | T:0.0121 | T:0.1369 |
| T:0.0727     | T:0.0121 | T:0.1354 |
| A:0.3176     | A:0.0061 | A:0.3401 |
| C:0.4453     | A:0.5363 | A:0.67   |
| C:0.3658     | C:0.2905 | C:0.2579 |
|              |          |          |
| C:0.2454     | C:0.4523 | C:0.1844 |
| T:0.1565     | C:0.8517 | C:0.8012 |
|              |          |          |
| A:0.0206     | A:0.0023 | A:0.0504 |
| C:0.3370     | T:0.559  | T:0.5187 |
| A:0.0144     | A:0.0121 | A:0.013  |
| A:0.0883     | A:0.0703 | A:0.1052 |
| T:0.0891     | T:0.0703 | T:0.1052 |
| C:0.3914     | C:0.3578 | C:0.4395 |
|              |          |          |
| C:0.4379     | C:0.2519 | C:0.2882 |
| T:0.4383     | C:0.5613 | C:0.3314 |
| T:0.0749     | T:0.0257 | T:0.1268 |
|              |          |          |
| G:0.0731     | G:0.0113 | G:0.1153 |
| T:0.0006     | T:0      | T:0.0014 |
| C:0.0325     | C:0.0651 | C:0.0086 |
| A:0.3243     | A:0.2292 | A:0.2767 |
| C:0.3474     | T:0.8215 | T:0.5476 |
|              |          |          |
| T:0.1735     | T:0.2315 | T:0.1138 |
| T:0.0661     | T:0.0053 | T:0.0389 |

VEP annotated somatic variants

|               |                   |                 |
|---------------|-------------------|-----------------|
| A:0.3944      | A:0.1309          | A:0.4524        |
| A:0.0797      | A:0.0076          | A:0.2464        |
| T:0.3830      | T:0.2943          | T:0.33          |
| T:0.1843      | T:0.1286          | T:0.1931        |
| G:0.3582      | A:0.4508          | A:0.6326        |
| T:0.4525      | T:0.0696          | T:0.5951        |
| A:0.2524      | A:0.236           | A:0.3775        |
| A:0.0427      | A:0.0182          | A:0.0331        |
| T:0.0549      | T:0.1195          | T:0.0576        |
| C:0.1224      | C:0.1657          | C:0.098         |
| A:0.0661      | A:0.0076          | A:0.0663        |
| A:0.2570      | A:0.211           | A:0.2075        |
| C:0.3897      | C:0.0265          | C:0.3689        |
| her:PTHR11254 |                   |                 |
| T:0.2692      | T:0.3427          | T:0.3271        |
| G:0.4609      | G:0.652           | G:0.3588        |
| C:0.0154      | C:0.003           | C:0.0173        |
| G:0.3736      | G:0.4849          | G:0.3991        |
| G:0.3638      | C:0.4123          | C:0.8444        |
| G:0.3918      | G:0.171           | G:0.4481        |
| G:0.2304      | G:0.1346          | G:0.3429        |
| T:0.3844      |                   |                 |
| A:0.2224      | A:0.093           | A:0.2738        |
| A:0.2770      | A:0.3328          | A:0.2925        |
| T:0.2109      | T:0.3661          | T:0.183         |
| T:0.4972      | C:0.4236          | C:0.3357        |
| G:0.2437      | G:0.3253          | G:0.2406        |
| A:0.3804      | A:0.6067          | A:0.4092        |
| A:0.2634      | A:0.3775          | A:0.317         |
| G:0.3950      | G:0.7057          | G:0.402         |
| C:0.0599      | C:0.1505          | C:0.0346        |
| -:0.0264      | -:0.003           | -:0.0447        |
| G:0.3155      |                   |                 |
| GG:0.3822     | -:0.6952,-:0.6952 | -:0.572,-:0.572 |
| T:0.0018      | T:0               | T:0             |
| T:0.1104      | T:0.177           | T:0.1023        |
| T:0.0178      | T:0.0098          | T:0.0274        |
| C:0.0048      | C:0.0008          | C:0.0029        |
| A:0.1268      | A:0.0938          | A:0.1729        |
| G:0.3231      | G:0.4145          | G:0.2622        |
| T:0.2448      | T:0.1793          | T:0.2363        |
| G:0.2478      | G:0.2057          | G:0.2435        |
| A:0.0168      | A:0.0015          | A:0.0288        |
| G:0.3976      | G:0.4054          | G:0.5303        |
| A:0.2698      | A:0.146           | A:0.2522        |
| A:0.0497      | A:0.0129          | A:0.0259        |
| C:0.0036      | C:0               | C:0.0014        |

VEP annotated somatic variants

|          |          |          |
|----------|----------|----------|
| A:0.4143 | G:0.7141 | G:0.5922 |
| T:0.4123 | C:0.7141 | C:0.5922 |
| C:0.1406 | C:0.0083 | C:0.1657 |
| A:0.2642 | A:0.4236 | A:0.1931 |
| C:0.2590 | C:0.2012 | C:0.3934 |
| T:0.2450 | T:0.1989 | T:0.379  |
| T:0.4922 | C:0.7042 | C:0.5576 |
| A:0.0776 | G:0.6967 | G:0.5994 |
| C:0.0016 | C:0      | C:0.0014 |
| T:0.3031 | T:0.3154 | T:0.2752 |
|          |          |          |
| A:0.0030 | A:0      | A:0      |
| A:0.0407 | A:0.0038 | A:0.0591 |
| G:0.4283 | A:0.7716 | A:0.389  |
| C:0.2532 | C:0.0234 | C:0.2536 |
| T:0.1591 | T:0.1233 | T:0.1772 |
|          |          |          |
| A:0.2388 | G:0.7073 | G:0.8012 |
| A:0.0755 | A:0.0197 | A:0.0764 |
| G:0.2019 | G:0.1006 | G:0.2205 |
| T:0.1877 | T:0.056  | T:0.2147 |
| -:0.3087 | -:0.2776 | -:0.3012 |
| T:0.1142 | T:0.1339 | T:0.1974 |
| G:0.2831 | G:0.3343 | G:0.3228 |
| A:0.2506 | A:0.1641 | A:0.2291 |
| A:0.3189 | A:0.3026 | A:0.3444 |
| C:0.4385 | T:0.6074 | T:0.6398 |
| C:0.3672 | C:0.4818 | C:0.3228 |
|          |          |          |
| T:0.2887 | T:0.4455 | T:0.3919 |
| T:0.1510 | T:0.0545 | T:0.2882 |
| C:0.0266 | C:0.0015 | C:0.0288 |
| A:0.1456 | A:0.2194 | A:0.1484 |
| A:0.0595 | A:0.0764 | A:0.0187 |
|          |          |          |
| T:0.0012 | T:0.0008 | T:0      |
|          |          |          |
| A:0.1555 | A:0.0204 | A:0.0259 |
| G:0.3600 | G:0.4387 | G:0.3213 |
| G:0.3335 | G:0.416  | G:0.281  |
| T:0.3275 |          |          |
| A:0.0495 | A:0.0325 | A:0.0072 |
| A:0.2712 | A:0.028  | A:0.3055 |
| G:0.2969 | G:0.5749 | G:0.2233 |

ipanthr:PTHR22590:SF1,SMART\_domains:SM00015,Superfamily\_domains:SSF52540

|          |          |          |
|----------|----------|----------|
| A:0.0162 | A:0.0008 | A:0.0202 |
| A:0.2804 | A:0.0741 | A:0.1614 |
| T:0.2438 | T:0.0741 | T:0.2867 |
|          |          |          |
| T:0.0974 | T:0.1233 | T:0.0533 |
| C:0.3556 | C:0.2073 | C:0.3732 |



VEP annotated somatic variants

G:0.1354  
3F155,hmmpanther:PTHR24412

G:0.0151

G:0.2666

C:0.0042  
C:0.4367  
A:0.1999  
T:0.4481

C:0.0008  
A:0.5287  
G:0.8775  
T:0.1044

C:0.0072  
A:0.4942  
G:0.647  
T:0.5951

T:0.0978  
A:0.0004  
C:0.3083  
A:0.1707  
T:0.2143  
T:0.2592  
A:0.2149  
T:0.0174  
-:0.1168  
G:0.2536  
A:0.4169  
G:0.0994  
G:0.4683  
T:0.4950  
A:0.4299  
A:0.2748  
A:0.4477

T:0.0356  
A:0  
C:0.3729  
A:0.0635  
C:0.8714  
C:0.82  
G:0.9191  
T:0  
-:0.1717  
G:0.4002  
A:0.118  
T:0.9887  
A:0.3321  
C:0.2398  
A:0.3729  
A:0.0666  
G:0.5779

T:0.1009  
A:0  
C:0.1816  
A:0.1196  
C:0.7493  
C:0.7104  
G:0.7493  
T:0.0274  
-:0.1715  
G:0.17  
A:0.5346  
T:0.8746  
A:0.6254  
C:0.6138  
A:0.4063  
A:0.3516  
G:0.6369

A:0.2955  
A:0.2530  
C:0.4551  
T:0.3297  
A:0.0002  
T:0.2875

A:0.3283  
A:0.1997  
A:0.4917  
T:0.4781  
A:0  
T:0.4017

A:0.2291  
A:0.3862  
A:0.6297  
T:0.3862  
A:0.0014  
T:0.2536

A:0.3347

A:0.5076

A:0.281

T:0.4972  
G:0.0016  
C:0.3357  
G:0.1212  
T:0.4067  
A:0.4675  
T:0.0491  
A:0.0002  
A:0.0132  
A:0.4093  
T:0.4016  
A:0.3630  
G:0.0068

C:0.2247  
G:0.0008  
C:0.348  
G:0.0265  
C:0.1717  
A:0.3245  
T:0.0401  
A:0  
A:0.0015  
A:0.3699  
T:0.4637  
A:0.0772  
G:0.0015

C:0.464  
G:0.0014  
C:0.2305  
G:0.1902  
C:0.6801  
A:0.5288  
T:0.0504  
A:0  
A:0.0173  
A:0.5231  
T:0.3631  
A:0.2925  
G:0.0159

G:0.0815  
A:0.0084  
G:0.1508

G:0.0938  
A:0.0008  
G:0.0182

G:0.0965  
A:0.0101  
G:0.2003

VEP annotated somatic variants

|          |          |                   |
|----------|----------|-------------------|
| T:0.2809 | T:0.118  | T:0.4251          |
| A:0.1983 | A:0.0983 | A:0.1902          |
| C:0.0222 | C:0      | C:0.0144          |
| G:0.4034 | T:0.8759 | T:0.5735          |
| G:0.0032 | G:0.0008 | G:0               |
| T:0.2270 | G:0.7595 | G:0.8429          |
| T:0.2750 | T:0.084  | T:0.4928          |
| C:0.0411 | C:0.0015 | C:0.1052          |
| T:0.2019 | C:0.8707 | C:0.8127          |
| C:0.1113 | C:0.025  | C:0.0519          |
| C:0.4225 | C:0.1793 | C:0.1758          |
| <br>     |          |                   |
| C:0.2591 | C:0.3964 | C:0.1225          |
| C:0.2866 | T:0.4365 | T:0.5865          |
| <br>     |          |                   |
| T:0.1158 | T:0.0257 | T:0.2003          |
| G:0.2416 | G:0.0393 | G:0.2579          |
| A:0.3361 | A:0.5552 | A:0.3314          |
| C:0.4339 | C:0.1762 | C:0.4841          |
| <br>     |          |                   |
| C:0.3205 | T:0.1082 | T:0.6412          |
| T:0.0064 | T:0.0008 | T:0.0086          |
| C:0.0036 | C:0      | C:0.0115          |
| G:0.0108 | G:0.0008 | G:0.0144          |
| -:0.0050 | -:0      | -:0.0058          |
| T:0.4976 | C:0.6679 | C:0.3473          |
| C:0.4469 | C:0.4652 | C:0.3343          |
| G:0.2772 | G:0.2368 | G:0.3718          |
| T:0.3958 | T:0.1959 | T:0.3444          |
| G:0.1030 | G:0.1437 | G:0.1873          |
| A:0.3638 | A:0.2814 | A:0.5029          |
| T:0.1360 | T:0.0454 | T:0.1499          |
| <br>     |          |                   |
| A:0.0008 | A:0,A:0  | A:0.0014,A:0.0014 |
| <br>     |          |                   |
| T:0.3135 | C:0.8767 | C:0.6297          |
| C:0.3053 | C:0.0408 | C:0.4308          |
| C:0.0006 | C:0      | C:0               |
| <br>     |          |                   |
| C:0.0002 | C:0      | C:0.0014          |
| G:0.4916 | G:0.8101 | G:0.3746          |
| T:0.1873 | T:0.0303 | T:0.3084          |
| T:0.0725 | T:0.0061 | T:0.1988          |
| T:0.1348 | T:0.1369 | T:0.134           |
| A:0.0527 | A:0.0061 | A:0.0879          |
| A:0.2650 | A:0.2451 | A:0.1744          |
| A:0.3832 | A:0.2511 | A:0.2925          |
| T:0.2105 | T:0.1135 | T:0.1441          |
| T:0.1484 | T:0.1619 | T:0.1974          |
| T:0.4764 | A:0.7814 | A:0.5389          |
| A:0.2244 | A:0.2549 | A:0.2205          |
| A:0.4962 | G:0.7118 | G:0.5346          |
| T:0.0609 | T:0.1392 | T:0.0159          |

VEP annotated somatic variants

|               |               |               |
|---------------|---------------|---------------|
| C:0.0495      | C:0.0287      | C:0.0591      |
| C:0.3107      | C:0.5333      | C:0.3098      |
| C:0.4373      | T:0.848       | T:0.5086      |
| G:0.2125      | G:0.0121      | G:0.317       |
| T:0.2943      | T:0.497       | T:0.3501      |
| A:0.2544      | A:0.1785      | A:0.2824      |
| G:0.0335      | G:0.0461      | G:0.036       |
| G:0.0014      | G:0           | G:0           |
| T:0.1483      | T:0.0068      | T:0.1138      |
| G:0.2485      | A:0.6589      | A:0.5764      |
| T:0.4778      | T:0.3623      | T:0.5202      |
| G:0.2079      | A:0.9236      | A:0.7666      |
| C:0.4471      | T:0.643       | T:0.5173      |
| G:0.4255      | G:0.4251      | G:0.3833      |
| A:0.0903      | G:0.9259      | G:0.8559      |
| C:0.3790      | C:0.267       | C:0.4669      |
| G:0.3347      | G:0.0333      | G:0.3357      |
| A:0.0036      | A:0           | A:0.0072      |
| T:0.0581      | T:0.0045      | T:0.1427      |
| T:0.1745      | T:0.1921      | T:0.2104      |
| T:0.3103      | T:0.1558      | T:0.4654      |
| T:0.2206      | T:0.4365      | T:0.1542      |
| G:0.3233      | G:0.149       | G:0.4323      |
| G:0.2476      | T:0.9115      | T:0.6844      |
| G:0.3277      | G:0.1619      | G:0.4481      |
| G:0.4625      | A:0.4365      | A:0.6124      |
| GGGAGA:0.3542 | GGGAGA:0.3321 | GGGAGA:0.2651 |
| C:0.2264      | C:0.27        | C:0.2983      |
| C:0.1120      | C:0.0068      | C:0.1066      |
| A:0.1991      | A:0.3585      | A:0.1571      |
| T:0.3027      | C:0.6808      | C:0.6196      |
| G:0.4914      | A:0.2126      | A:0.6441      |
| A:0.3889      | G:0.357       | G:0.4769      |
| A:0.4271      | A:0.3374      | A:0.451       |
| G:0.3892      | -:0.3555      | -:0.6643      |
| T:0.2039      | T:0.0575      | T:0.2349      |
| C:0.1056      | C:0.0212      | C:0.1888      |
| T:0.0797      | T:0.1362      | T:0.0706      |
| C:0.3512      | C:0.7171      | C:0.2378      |
| A:0.3327      | A:0.0643      | A:0.4856      |
| C:0.4201      | C:0.2095      | C:0.3963      |
| T:0.0705      | T:0.0038      | T:0.0418      |
| C:0.4704      | C:0.6626      | C:0.3199      |
| C:0.0315      | C:0.0106      | C:0.0389      |
| A:0.4796      | G:0.5219      | G:0.6196      |
| T:0.0034      | T:0           | T:0.0115      |
| C:0.3059      | C:0.0257      | C:0.5908      |

VEP annotated somatic variants

|          |          |          |
|----------|----------|----------|
| T:0.1965 | T:0.3306 | T:0.2219 |
| T:0.0176 | T:0.0015 | T:0.0231 |
| G:0.4601 | G:0.4796 | G:0.549  |
| A:0.3317 | T:0.7935 | T:0.549  |
| G:0.3570 | G:0.2231 | G:0.3775 |
| T:0.3363 | T:0.1566 | T:0.3631 |
| C:0.3361 | C:0.1566 | C:0.3631 |
| A:0.3528 | A:0.2133 | A:0.3732 |
| T:0.0439 | T:0.0061 | T:0.0231 |
| T:0.0038 | T:0.0008 | T:0.0101 |
| A:0.0038 | A:0      | A:0.0029 |
| A:0.2889 | A:0.2065 | A:0.2378 |
| A:0.3143 | A:0.1823 | A:0.4294 |
| T:0.1581 | T:0.0348 | T:0.2291 |
| C:0.4988 | C:0.0991 | C:0.8199 |
| T:0.3381 | C:0.4516 | C:0.8934 |
| T:0.2588 | T:0.0076 | T:0.1844 |
| C:0.4792 | C:0.4939 | C:0.5605 |
| G:0.2774 | G:0.2852 | G:0.2925 |
| C:0.0032 | C:0      | C:0.0014 |
| T:0.0048 | T:0      | T:0.0043 |
| A:0.4916 | G:0.3502 | G:0.6859 |
| G:0.1158 | G:0.2277 | G:0.1138 |
| G:0.3049 | G:0.093  | G:0.3761 |
| A:0.4954 | G:0.4334 | G:0.4726 |
| C:0.2716 | T:0.8971 | T:0.7651 |
| A:0.0030 | A:0      | A:0.0043 |
| G:0.0060 | G:0      | G:0.0159 |
| -:0.0450 |          |          |
| C:0.0048 | C:0.0008 | C:0.013  |
| T:0.2246 | T:0.0272 | T:0.2262 |
| A:0.0240 | A:0.053  | A:0.0216 |
| A:0.0162 | A:0.0212 | A:0.0029 |
| G:0.3594 | G:0.4402 | G:0.353  |
| A:0.2073 | A:0.1089 | A:0.196  |
| A:0.0757 | A:0.0061 | A:0.1499 |
| G:0.0074 | G:0      | G:0.0115 |
| T:0.3155 | T:0.1036 | T:0.3963 |
| T:0.1763 | G:0.9297 | G:0.7853 |
| G:0.1166 | G:0.1437 | G:0.0692 |
| T:0.0206 | T:0.0038 | T:0.0317 |
| G:0.1164 | G:0.1483 | G:0.1153 |
| G:0.1392 | G:0.295  | G:0.0648 |
| G:0.3177 | G:0.2708 | G:0.3516 |

VEP annotated somatic variants

|          |          |          |
|----------|----------|----------|
| G:0.2440 | G:0.4017 | G:0.2378 |
| T:0.0032 | T:0.0061 | T:0.0029 |
| C:0.1056 | C:0.2534 | C:0.0706 |
| C:0.3247 | A:0.739  | A:0.6182 |
| T:0.0134 | T:0.0015 | T:0.0303 |
| C:0.1374 | C:0.0658 | C:0.1066 |
| A:0.0717 | A:0.0174 | A:0.0807 |
| A:0.1486 | A:0.354  | A:0.1441 |
| T:0.1144 | T:0.0855 | T:0.232  |

|          |          |          |
|----------|----------|----------|
| A:0.1605 | A:0.0166 | A:0.1484 |
| A:0.4579 | G:0.5386 | G:0.6369 |

|          |          |          |
|----------|----------|----------|
| -.0.1550 | -.0.0567 | -.0.1282 |
| T:0.1550 | T:0.0567 | T:0.1282 |
| C:0.4477 | T:0.3979 | T:0.4236 |
| C:0.4475 | A:0.3986 | A:0.4236 |
| T:0.1823 | C:0.7443 | C:0.621  |
| C:0.1311 | C:0.1626 | C:0.0951 |
| T:0.1391 | T:0.1815 | T:0.1009 |
| C:0.1391 | C:0.1815 | C:0.1009 |
| C:0.3025 | C:0.3828 | C:0.2032 |
| G:0.3998 | G:0.5711 | G:0.3631 |
| A:0.0148 | A:0.0015 | A:0.0115 |
| A:0.3199 | A:0.2118 | A:0.4409 |
| C:0.2893 | T:0.6384 | T:0.7853 |
| T:0.4103 | G:0.9342 | G:0.4625 |
| A:0.0030 |          |          |
| A:0.0437 | A:0.0741 | A:0.0317 |
| T:0.0234 | T:0.003  | T:0.0274 |
| T:0.0240 | T:0.0023 | T:0.0259 |
| A:0.1969 | A:0.1354 | A:0.2651 |
| G:0.3217 | G:0.4576 | G:0.2738 |
| T:0.2768 | C:0.851  | C:0.696  |
| A:0.0102 | A:0.0008 | A:0.0043 |
| A:0.1683 | A:0.2958 | A:0.0893 |
| G:0.0395 | G:0.0121 | G:0.0447 |
| T:0.0899 | T:0.0068 | T:0.0677 |
| G:0.2077 | G:0.3638 | G:0.1196 |
| G:0.3289 | G:0.7421 | G:0.1715 |

|            |            |            |
|------------|------------|------------|
| G:0.0615   | G:0.1142   | G:0.0706   |
| AGC:0.2111 | AGC:0.1596 | AGC:0.2133 |
| G:0.4196   | G:0.5318   | G:0.1383   |
| A:0.0976   | A:0.0083   | A:0.2277   |

T\_domains:SM00360,SMART\_domains:SM00361,Superfamily\_domains:SSF54928,TIGRFAM\_domai

|          |          |          |
|----------|----------|----------|
| T:0.0216 | T:0.0045 | T:0.0331 |
| A:0.3335 | A:0.1339 | A:0.3545 |
| A:0.0489 | A:0.1641 | A:0.0216 |
| A:0.0693 | A:0.0885 | A:0.1023 |
| G:0.3608 | G:0.4766 | G:0.2233 |
| A:0.2256 | A:0.0136 | A:0.2983 |

VEP annotated somatic variants

|               |          |          |
|---------------|----------|----------|
| A:0.1302      | A:0.0552 | A:0.1297 |
| T:0.1408      | T:0.1679 | T:0.0778 |
| G:0.0050      | G:0      | G:0.0086 |
| G:0.0357      | G:0.0121 | G:0.0562 |
| G:0.1560      | G:0.1498 | G:0.1556 |
| G:0.1573      | G:0.1808 | G:0.232  |
| her:PTHR24027 |          |          |
| A:0.0885      | A:0.0204 | A:0.0793 |
| G:0.3327      | A:0.9009 | A:0.6715 |
| A:0.0022      |          |          |
| T:0.3880      | T:0.1437 | T:0.451  |
| G:0.0144      | G:0.0023 | G:0.0187 |
| A:0.2855      | A:0.2534 | A:0.2406 |
| T:0.0006      |          |          |
| C:0.2853      | C:0.3041 | C:0.3184 |
| C:0.2989      | C:0.3525 | C:0.3228 |
| C:0.4507      | C:0.351  | C:0.6297 |
| G:0.4177      | G:0.3313 | G:0.6153 |
| G:0.3399      | G:0.1687 | G:0.5331 |
| -:0.2288      | -:0.0961 | -:0.3718 |
| G:0.1975      | G:0.0696 | G:0.2536 |
| T:0.4365      | G:0.7103 | G:0.4179 |
| A:0.1945      | A:0.146  | A:0.1499 |
| C:0.2234      | C:0.2617 | C:0.1585 |
| A:0.2784      | A:0.4932 | A:0.2176 |
| G:0.2584      | G:0.4206 | G:0.2133 |
| G:0.4467      | G:0.438  | G:0.4597 |
| T:0.2594      | T:0.1354 | T:0.2161 |
| C:0.0874      | C:0.0053 | C:0.1873 |
| T:0.2246      | T:0.1581 | T:0.2406 |
| G:0.3255      | G:0.3389 | G:0.3689 |
| T:0.3087      | T:0.3169 | T:0.3415 |
| A:0.1641      | A:0.2504 | A:0.245  |
| G:0.2949      | G:0.2708 | G:0.17   |
| C:0.2378      | C:0.1982 | C:0.1902 |
| G:0.0956      | G:0.0144 | G:0.1239 |
| G:0.0753      | G:0.0038 | G:0.0634 |
| G:0.2222      | G:0.3472 | G:0.2997 |
| A:0.3718      | A:0.3676 | A:0.2867 |
| G:0.4421      | G:0.4312 | G:0.3429 |
| A:0.1367      | A:0.053  | A:0.2205 |
| C:0.3532      | C:0.1808 | C:0.4683 |
| A:0.4920      | T:0.3411 | T:0.5519 |
| C:0.0353      | C:0.0136 | C:0.0634 |
| T:0.1034      | T:0.0166 | T:0.0706 |
| A:0.0883      | A:0.0416 | A:0.062  |
| G:0.4852      | G:0.59   | G:0.3473 |

VEP annotated somatic variants

|                 |                   |                   |
|-----------------|-------------------|-------------------|
| T:0.2131        | T:0.2012          | T:0.1729          |
| T:0.3079        | T:0.4561          | T:0.2104          |
| C:0.2378        | C:0.1672          | C:0.2983          |
| A:0.2929        | G:0.7352          | G:0.6671          |
| T:0.1312        | C:0.916           | C:0.8343          |
| C:0.4667        | C:0.8782          | C:0.3674          |
| G:0.2324        | G:0.0613          | G:0.2882          |
| A:0.2382        | A:0.0416          | A:0.2983          |
| A:0.2302        | A:0.0272          | A:0.2968          |
| G:0.4770        | G:0.8979          | G:0.3746          |
| G:0.4461        | G:0.7844          | G:0.3703          |
| <br>            |                   |                   |
| T:0.2111        | T:0.093           | T:0.1974          |
| G:0.4677        | C:0.5605          | C:0.6023          |
| G:0.3926        | G:0.3691          | G:0.3559          |
| A:0.1400        | A:0.0605          | A:0.1671          |
| <br>            |                   |                   |
| A:0.4830        | A:0.3321          | A:0.6484          |
| T:0.2432        | T:0.3101          | T:0.1614          |
| <br>            |                   |                   |
| T:0.2404        | T:0.3238          | T:0.1859          |
| C:0.3754        | C:0.3177          | C:0.2666          |
| A:0.2021        | A:0.3419          | A:0.1758          |
| -:0.2081        | -:0.1172,-:0.1172 | -:0.17,-:0.17     |
| <br>            |                   |                   |
| G:0.1354        | G:0.1899          | G:0.1744          |
| A:0.3614        | A:0.4168          | A:0.4496          |
| C:0.2228        | C:0.5083          | C:0.1268          |
| G:0.0703        | G:0.0053          | G:0.1167          |
| T:0.1266        | T:0.0484          | T:0.1138          |
| T:0.4718        | C:0.4887          | C:0.6023          |
| GAACCC:0.3890   | GAACCC:0.4493     | GAACCC:0.2896     |
| G:0.3534        | G:0.2315          | G:0.3761          |
| A:0.0974        | A:0.0083          | A:0.2262          |
| C:0.3147        | C:0.2874          | C:0.2622          |
| TGTTT:0.1777    | TGTTTTGTTT:0.1604 | TGTTTTGTTT:0.1556 |
| C:0.3746        | T:0.3956          | T:0.4049          |
| A:0.3958        | A:0.3555          | A:0.4049          |
| A:0.3486        | A:0.1679          | A:0.3372          |
| T:0.3470        | C:0.5113          | C:0.513           |
| A:0.3526        | T:0.5             | T:0.5115          |
| T:0.3528        | C:0.5             | C:0.5101          |
| G:0.3349        | G:0.5174          | G:0.1888          |
| G:0.4968        | G:0.5915          | G:0.5072          |
| G:0.2899        | G:0.2481          | G:0.2565          |
| <br>            |                   |                   |
| A:0.2823        | A:0.3411          | A:0.2925          |
| <br>            |                   |                   |
| A:0.0196        | A:0.0023          | A:0.0504          |
| <br>            |                   |                   |
| A:0.0102        | A:0               | A:0.0202          |
| T:0.3998        | T:0.59            | T:0.3588          |
| A:0.1813        | A:0.0363          | A:0.3386          |
| AAACAAAC:0.3103 |                   |                   |

VEP annotated somatic variants

|                                                                      |                 |                 |
|----------------------------------------------------------------------|-----------------|-----------------|
| -:0.0014                                                             | -:0             | -:0.0014        |
| A:0.0964                                                             | A:0.0643        | A:0.2061        |
| A:0.1076                                                             | A:0.0885        | A:0.2176        |
| G:0.0036                                                             |                 |                 |
| G:0.1979                                                             | G:0.2685        | G:0.1556        |
| C:0.3662                                                             | C:0.3094        | C:0.2911        |
| G:0.3051                                                             | G:0.2882        | G:0.2882        |
| A:0.3586                                                             | A:0.5461        | A:0.3429        |
| G:0.1308                                                             | G:0.2352        | G:0.0735        |
| T:0.4040                                                             | C:0.5454        | C:0.5418        |
| G:0.1408                                                             | G:0.0333        | G:0.232         |
| A:0.1196                                                             | A:0.0129        | A:0.1628        |
| A:0.2027                                                             | A:0.0998        | A:0.134         |
| G:0.0118                                                             | G:0             | G:0             |
| A:0.0118                                                             | A:0             | A:0             |
| C:0.0136                                                             | C:0.0068        | C:0             |
| GC:0.0118                                                            | GC:0            | GC:0            |
| C:0.4866                                                             | C:0.4932        | C:0.4841        |
| C:0.4868                                                             | G:0.6301        | G:0.4424        |
| G:0.2967                                                             | G:0.553         | G:0.2075        |
| A:0.2075                                                             | A:0.177         | A:0.2522        |
| A:0.0305                                                             | G:0.7352        | G:0.7262        |
| A:0.4830                                                             | A:0.7118        | A:0.3271        |
| G:0.4141                                                             | A:0.7254        | A:0.5461        |
| TTCCACG:0.0152                                                       | TTCCACG:0.0008  | TTCCACG:0.0231  |
| G:0.2504                                                             | G:0.3192        | G:0.2349        |
| G:0.3309                                                             | G:0.708         | G:0.183         |
| A:0.3646                                                             | A:0.6475        | A:0.4683        |
| C:0.2037                                                             | A:0.7337        | A:0.8487        |
| C:0.2230                                                             | C:0.0802        | C:0.2248        |
| G:0.3892                                                             | -:0.2965        | -:0.6844        |
| T:0.0004                                                             | T:0             | T:0             |
| 4,hmmpanther:PTHR13948                                               |                 |                 |
| A:0.4625                                                             | A:0.5628        | A:0.3674        |
| T:0.2863                                                             | T:0.2708        | T:0.1945        |
| C:0.1504                                                             | C:0.0998        | C:0.1859        |
| G:0.2554                                                             | G:0.0469        | G:0.2464        |
| -:0.2496                                                             | -:0.025         | -:0.2363        |
| G:0.2402                                                             | G:0.4455        | G:0.1297        |
| GGGGATTA:0.0917                                                      | GGGGATTA:0.0893 | GGGGATTA:0.1239 |
| G:0.1028                                                             | G:0.0522        | G:0.1383        |
| C:0.4904                                                             | C:0.174         | C:0.585         |
| A:0.4902                                                             | A:0.174         | A:0.585         |
| T:0.3690                                                             | C:0.7988        | C:0.5591        |
| T:0.2135                                                             | T:0.0159        | T:0.2795        |
| C:0.4046                                                             | C:0.2148        | C:0.428         |
| A:0.1368                                                             | A:0.1225        | A:0.1671        |
| T:0.4455                                                             | T:0.2799        | T:0.4654        |
| -:0.2997                                                             | AA:0.6331       | AA:0.7147       |
| C:0.1743                                                             | T:0.9145        | T:0.7839        |
| T:0.0929                                                             | T:0.1694        | T:0.0764        |
| panther:PTHR24141,SMART_domains:SM00248,Superfamily_domains:SSF48403 |                 |                 |



VEP annotated somatic variants

|          |                   |                   |
|----------|-------------------|-------------------|
| T:0.3423 | T:0.2201          | T:0.2911          |
| -:0.3185 | -:0.1876          | -:0.4568          |
| A:0.0048 | A:0               | A:0.0072          |
| C:0.3353 | C:0.1861          | C:0.3977          |
| A:0.2939 | A:0.0363          | A:0.3847          |
| T:0.3998 | T:0.2035          | T:0.5634          |
| A:0.1040 | A:0.084           | A:0.1153          |
| C:0.4415 | G:0.6762          | G:0.5677          |
| T:0.0036 | T:0               | T:0.0072          |
| A:0.4730 | C:0.4788          | C:0.598           |
| G:0.3788 | A:0.6127          | A:0.5663          |
| A:0.3628 | C:0.7133          | C:0.6095          |
| A:0.4687 | A:0.2769          | A:0.4308          |
| T:0.2310 | T:0.028           | T:0.2406          |
| A:0.2746 | A:0.1407          | A:0.4813          |
| C:0.2025 | C:0.0734          | C:0.3055          |
| T:0.2997 | T:0.1884          | T:0.4121          |
| T:0.3030 | T:0.0726          | T:0.3718          |
| G:0.1989 | G:0.1884          | G:0.2723          |
| T:0.2492 | T:0.1634          | T:0.2925          |
| T:0.2454 | T:0.1536          | T:0.2911          |
| G:0.3592 | A:0.4244          | A:0.7219          |
| G:0.3538 | A:0.4251          | A:0.7291          |
| G:0.2853 | G:0.4909          | G:0.2723          |
| C:0.1809 | C:0.3434          | C:0.1859          |
| T:0.2630 | C:0.4221          | C:0.879           |
| T:0.4964 | T:0.4145          | T:0.4769          |
| A:0.0044 |                   |                   |
| C:0.1831 | C:0.1914          | C:0.2291          |
| A:0.4830 | A:0.1876          | A:0.5735          |
| T:0.4493 | T:0.4826,T:0.4826 | T:0.3357,T:0.3357 |
| A:0.1867 | A:0.1059,A:0.1059 | A:0.1902,A:0.1902 |
| T:0.0058 | T:0.0182          | T:0.0043          |
| T:0.4435 | A:0.4697          | A:0.7421          |
| T:0.2931 | T:0.0507          | T:0.5245          |
| A:0.1378 | A:0.0628          | A:0.0735          |
| G:0.0296 | G:0.0076          | G:0.0403          |
| C:0.2628 | C:0.0741          | C:0.4553          |
| A:0.4990 | G:0.4909          | G:0.5389          |
| A:0.2548 | A:0.1846          | A:0.3055          |
| T:0.4519 | T:0.5416          | T:0.3199          |
| T:0.1044 | T:0.0575          | T:0.147           |
| G:0.4030 | G:0.5681          | G:0.3934          |
| A:0.2927 | A:0.5719          | A:0.2464          |
| A:0.4509 | A:0.6906          | A:0.4193          |
| A:0.1408 | C:0.8306          | C:0.915           |
| C:0.2672 | T:0.6891          | T:0.6744          |
| A:0.1128 | G:0.8979          | G:0.8804          |

VEP annotated somatic variants

|          |          |          |
|----------|----------|----------|
| A:0.0986 | T:0.9539 | T:0.8862 |
| T:0.1134 | T:0.1815 | T:0.085  |
| C:0.4211 | C:0.7534 | C:0.4006 |
| T:0.0002 | T:0      | T:0.0014 |
| A:0.0028 | A:0      | A:0.0029 |
| A:0.1959 | A:0.0893 | A:0.2305 |
| G:0.1154 | G:0.1225 | G:0.1628 |
| A:0.2492 | A:0.0144 | A:0.3487 |
| -:0.1835 | -:0.1944 | -:0.183  |
| G:0.2009 | G:0.2542 | G:0.1902 |
| G:0.1853 | G:0.1997 | G:0.1844 |
| T:0.1937 | T:0.23   | T:0.1859 |
| T:0.0082 | T:0.0038 | T:0.0086 |
| C:0.0481 | C:0.1097 | C:0.0562 |
| G:0.0549 | G:0.0257 | G:0.0634 |
| A:0.0361 | A:0.0053 | A:0.036  |
| C:0.4898 | C:0.2519 | C:0.5793 |
| C:0.4952 | G:0.3313 | G:0.5706 |
| G:0.1893 | G:0.3457 | G:0.134  |
| A:0.2600 | A:0.3472 | A:0.3876 |
| C:0.2496 | C:0.3192 | C:0.281  |
| G:0.4581 | C:0.8797 | C:0.4914 |

|          |          |          |
|----------|----------|----------|
| C:0.0433 | C:0.0129 | C:0.0793 |
| A:0.4714 | A:0.2874 | A:0.4135 |
| A:0.0014 | A:0      | A:0.0014 |
| -:0.3105 | -:0.3026 | -:0.3084 |
| T:0.4355 | C:0.5371 | C:0.3458 |
| G:0.3470 | C:0.7995 | C:0.3919 |
| A:0.0146 | A:0.0038 | A:0.0187 |
| A:0.3423 | A:0.6929 | A:0.2839 |
| C:0.1356 | C:0.0643 | C:0.1628 |
| T:0.1232 | T:0.0136 | T:0.3646 |
| T:0.1248 | T:0.0159 | T:0.3646 |
| T:0.4750 | T:0.1195 | T:0.6441 |
| T:0.0003 | T:0      | T:0.0014 |
| C:0.4355 | T:0.5477 | T:0.7219 |

|          |          |          |
|----------|----------|----------|
| C:0.1721 | C:0.0522 | C:0.1729 |
| C:0.0933 | C:0.0469 | C:0.1657 |
| T:0.0403 | T:0.003  | T:0.0562 |

THR10361:SF20

|          |         |          |
|----------|---------|----------|
| C:0.0988 | C:0.118 | C:0.1268 |
|----------|---------|----------|

|          |          |          |
|----------|----------|----------|
| G:0.1414 | G:0.0628 | G:0.1297 |
| T:0.3362 | C:0.531  | C:0.3084 |
| T:0.1238 | T:0.0106 | T:0.1066 |
| A:0.1254 | A:0.0106 | A:0.1052 |
| C:0.4862 | C:0.3434 | C:0.3285 |

|          |          |          |
|----------|----------|----------|
| T:0.1430 | C:0.8691 | C:0.8184 |
|----------|----------|----------|

|          |          |          |
|----------|----------|----------|
| T:0.0565 | T:0.0893 | T:0.0245 |
|----------|----------|----------|

VEP annotated somatic variants

|               |          |          |
|---------------|----------|----------|
| T:0.0331      | T:0.0061 | T:0.0144 |
| T:0.0090      | T:0.003  | T:0.0144 |
| C:0.3560      | C:0.3616 | C:0.3761 |
| T:0.2833      | T:0.2632 | T:0.2349 |
| A:0.3059      | A:0.0908 | A:0.5    |
| G:0.2380      | A:0.8464 | A:0.8127 |
| A:0.3858      | A:0.2738 | A:0.3516 |
| A:0.3339      | G:0.9486 | G:0.5173 |
| G:0.1028      | G:0.0545 | G:0.1066 |
| A:0.2967      | A:0.3464 | A:0.1801 |
| A:0.1266      | A:0.0643 | A:0.1153 |
| G:0.1601      | G:0.2163 | G:0.1902 |
| G:0.1391      | G:0.0809 | G:0.1787 |
| T:0.3051      | T:0.3396 | T:0.2248 |
| G:0.2037      | T:0.6717 | T:0.8602 |
| A:0.1565      | A:0.2761 | A:0.1268 |
| T:0.3938      | T:0.1157 | T:0.5533 |
| A:0.1046      | A:0.1331 | A:0.0778 |
| C:0.2331      | G:0.7428 | G:0.5101 |
| C:0.4495      | T:0.8472 | T:0.3905 |
| A:0.2171      | A:0.0076 | A:0.3718 |
| A:0.0535      | A:0.0091 | A:0.1427 |
| T:0.0214      | T:0.0643 | T:0.013  |
| A:0.3343      | A:0.1324 | A:0.5144 |
| A:0.4361      | G:0.6906 | G:0.5072 |
| A:0.1318      | A:0.0749 | A:0.0461 |
| T:0.2363      |          |          |
| G:0.4976      | G:0.1112 | G:0.5648 |
| HR19897:SF156 |          |          |
| C:0.0178      | C:0.0015 | C:0.0288 |
| T:0.1442      | T:0.2201 | T:0.1585 |
| A:0.0725      | A:0.0091 | A:0.0821 |
| G:0.0032      | G:0.0008 | G:0.0058 |
| T:0.1452      | T:0.1324 | T:0.1383 |
| T:0.3896      | T:0.525  | T:0.3703 |
| C:0.4629      | C:0.7481 | C:0.3833 |
| T:0.0080      | T:0.0008 | T:0.0216 |
| A:0.2190      | G:0.6657 | G:0.8184 |
| C:0.3538      | C:0.4168 | C:0.3804 |
| T:0.1260      | T:0.1135 | T:0.1628 |
| G:0.0004      | G:0      | G:0.0014 |

VEP annotated somatic variants

|               |          |          |
|---------------|----------|----------|
| G:0.2404      | G:0.2352 | G:0.2032 |
| T:0.3139      | C:0.8449 | C:0.598  |
| A:0.4121      | A:0.3843 | A:0.4654 |
| T:0.2690      | T:0.3873 | T:0.1902 |
| <br>          |          |          |
| G:0.2979      | G:0.1921 | G:0.3357 |
| G:0.1148      | G:0.025  | G:0.1585 |
| C:0.0637      | C:0.1475 | C:0.0591 |
| T:0.4014      | C:0.3457 | C:0.7032 |
| <br>          |          |          |
| C:0.1460      | C:0.0106 | C:0.1239 |
| G:0.3540      | A:0.767  | A:0.5965 |
| A:0.4952      | A:0.621  | A:0.4006 |
| T:0.4954      | T:0.6218 | T:0.4006 |
| G:0.3860      | G:0.8192 | G:0.183  |
| G:0.2538      | G:0.3313 | G:0.183  |
| C:0.3580      | C:0.2905 | C:0.232  |
| <br>          |          |          |
| C:0.1090      | C:0.2542 | C:0.1138 |
| C:0.0160      | C:0.0015 | C:0.0303 |
| T:0.0663      | T:0.0923 | T:0.049  |
| T:0.1344      | T:0.1921 | T:0.196  |
| C:0.2572      | C:0.0908 | C:0.3876 |
| A:0.2181      | A:0.0552 | A:0.2507 |
| C:0.3512      | T:0.7693 | T:0.598  |
| A:0.1699      | A:0.1331 | A:0.196  |
| C:0.3139      | C:0.3381 | C:0.1888 |
| T:0.2067      | T:0.1543 | T:0.2983 |
| A:0.0094      | A:0.0068 | A:0.0086 |
| T:0.2500      | T:0.2163 | T:0.2464 |
| C:0.2538      | C:0.2383 | C:0.2464 |
| G:0.4038      | A:0.3737 | A:0.4207 |
| T:0.3233      | T:0.3638 | T:0.2233 |
| T:0.0030      | T:0.003  | T:0.0043 |
| T:0.1919      | T:0.1165 | T:0.2594 |
| C:0.2678      | C:0.2103 | C:0.3112 |
| <br>          |          |          |
| A:0.0990      | A:0.1097 | A:0.0807 |
| C:0.1036      | C:0.1309 | C:0.0951 |
| her:PTHR15141 |          |          |
| T:0.3652      | T:0.2617 | T:0.2291 |
| T:0.1136      | T:0.1649 | T:0.1945 |
| T:0.3514      | T:0.3631 | T:0.3646 |
| <br>          |          |          |
| G:0.2416      | G:0.0295 | G:0.3343 |
| <br>          |          |          |
| T:0.1328      | T:0.0386 | T:0.1816 |
| C:0.0082      | C:0.0015 | C:0.0072 |
| A:0.2548      | A:0.0469 | A:0.3141 |
| C:0.3281      | T:0.6846 | T:0.7104 |
| T:0.0032      | T:0      | T:0      |
| A:0.1807      | A:0.1014 | A:0.1988 |
| A:0.3834      | G:0.4077 | G:0.67   |

VEP annotated somatic variants

|          |          |          |
|----------|----------|----------|
| G:0.2726 | A:0.7012 | A:0.5994 |
| A:0.4651 | G:0.9682 | G:0.3429 |
| A:0.1843 | A:0.2927 | A:0.1715 |
| -:0.2590 | -:0.3555 | -:0.1527 |
| C:0.4716 | C:0.4902 | C:0.3775 |
|          |          |          |
| A:0.0048 | A:0.0015 | A:0.0043 |
| A:0.2776 | A:0.1573 | A:0.33   |
|          |          |          |
| C:0.0012 | C:0      | C:0.0029 |
| T:0.4365 | T:0.2133 | T:0.4207 |
|          |          |          |
| T:0.3626 | T:0.2284 | T:0.4726 |
| C:0.3822 | C:0.2995 | C:0.4741 |
|          |          |          |
| G:0.1647 | G:0.1906 | G:0.0591 |
| C:0.1565 | C:0.1755 | C:0.1282 |
| G:0.1673 | G:0.1914 | G:0.1427 |
| A:0.1530 | A:0.1611 | A:0.1282 |
| -:0.0102 | -:0.0008 | -:0.0086 |
|          |          |          |
| G:0.0104 | G:0.0015 | G:0.0101 |
| A:0.1404 | A:0.0234 | A:0.2017 |
| A:0.4559 | A:0.4009 | A:0.4798 |
| C:0.1683 | C:0.2005 | C:0.2046 |
| C:0.3521 | C:0.0197 | C:0.2089 |
|          |          |          |
| G:0.0004 | G:0      | G:0      |
| T:0.2412 | T:0.053  | T:0.17   |
| A:0.4665 | C:0.1067 | C:0.5706 |
| T:0.3291 | T:0.1974 | T:0.5    |
| G:0.2552 | G:0.2489 | G:0.2536 |
| A:0.3450 | A:0.3638 | A:0.3228 |
| T:0.2768 | T:0.1248 | T:0.2954 |
| G:0.4742 | C:0.9728 | C:0.3285 |
| T:0.4736 | G:0.9584 | G:0.3285 |
| G:0.1368 | G:0.1974 | G:0.1052 |
| T:0.1236 | T:0.0091 | T:0.2277 |
|          |          |          |
| A:0.2819 | G:0.9266 | G:0.6988 |
| T:0.2786 | C:0.9266 | C:0.6988 |
|          |          |          |
| T:0.1008 |          |          |
| T:0.1869 | T:0.0091 | T:0.2017 |
| C:0.1873 | C:0.0091 | C:0.2017 |
| T:0.0505 | T:0.003  | T:0.0548 |
| T:0.4448 | C:0.5287 | C:0.2781 |
| T:0.1492 | T:0.0204 | T:0.2752 |
| A:0.3119 | A:0.2201 | A:0.3112 |
| A:0.4299 | A:0.1611 | A:0.5576 |
| T:0.0178 | T:0.0023 | T:0.049  |
| G:0.0060 | G:0      | G:0.0072 |
| A:0.2945 | T:0.7224 | T:0.5865 |

VEP annotated somatic variants

|          |                                       |          |    |
|----------|---------------------------------------|----------|----|
| -:0.1911 | ACACAGGTGTTTT:0.92CACACAGGTGTTTT:0.67 |          | C, |
| C:0.3934 | C:0.6974                              | C:0.3761 |    |
| T:0.0008 | T:0.0015                              | T:0      |    |
| C:0.0018 | C:0                                   | C:0.0043 |    |
| C:0.1611 | C:0.1732                              | C:0.0562 |    |
| T:0.1743 | T:0.1649                              | T:0.134  |    |
| C:0.3413 | C:0.2179                              | C:0.3228 |    |
| A:0.0393 | A:0.0061                              | A:0.0692 |    |
| G:0.3287 | G:0.031                               | G:0.4669 |    |
| G:0.1352 | G:0.2337                              | G:0.0937 |    |
| A:0.1388 | A:0.2337                              | A:0.0965 |    |
| G:0.3183 | G:0.2103                              | G:0.3184 |    |
| T:0.0532 | T:0.003                               | T:0.0562 |    |
| A:0.2665 | G:0.5741                              | G:0.5706 |    |
| A:0.2159 | A:0.2867                              | A:0.1527 |    |
| C:0.2712 | C:0.3275                              | C:0.1859 |    |
| C:0.3351 | C:0.3646                              | C:0.2867 |    |
| A:0.4924 | A:0.6853                              | A:0.5173 |    |
| T:0.0004 | T:0                                   | T:0.0014 |    |
| T:0.2554 | T:0.0242                              | T:0.4669 |    |
| C:0.4970 | C:0.6346                              | C:0.5821 |    |
| C:0.4295 | C:0.3979                              | C:0.5836 |    |
| A:0.4189 | G:0.8116                              | G:0.6599 |    |
| C:0.3067 | C:0.0991                              | C:0.513  |    |
| T:0.1482 | T:0.0772                              | T:0.2363 |    |
| G:0.0559 | G:0.0295                              | G:0.0648 |    |
| G:0.0280 | G:0.003                               | G:0.0274 |    |
| G:0.1789 | G:0.1929                              | G:0.0447 |    |
| T:0.0018 | T:0                                   | T:0.0029 |    |
| A:0.3946 | G:0.7844                              | G:0.5288 |    |
| C:0.4768 | C:0.6974                              | C:0.3977 |    |
| G:0.1761 | G:0.031                               | G:0.1369 |    |
| A:0.2831 | A:0.3306                              | A:0.3199 |    |
| T:0.4904 | C:0.8253                              | C:0.3934 |    |
| C:0.1691 | C:0.239                               | C:0.1167 |    |
| A:0.2728 | A:0.3631                              | A:0.366  |    |
| T:0.2873 | T:0.0582                              | T:0.2176 |    |
| A:0.3311 | A:0.6263                              | A:0.2853 |    |
| T:0.3187 | G:0.2806                              | G:0.8098 |    |
| C:0.3966 | T:0.6445                              | T:0.7003 |    |
| A:0.3578 | A:0.3253                              | A:0.4236 |    |
| C:0.3810 | T:0.5416                              | T:0.7133 |    |
| G:0.0004 | G:0                                   | G:0      |    |
| A:0.0242 | A:0.003                               | A:0.0317 |    |
| A:0.0066 | A:0.0008                              | A:0      |    |
| T:0.0090 | T:0                                   | T:0.0115 |    |
| T:0.2206 | C:0.9766                              | C:0.7709 |    |

VEP annotated somatic variants

39,Pfam\_domain:PF00443,Superfamily\_domains:SSF54001

HR24006:SF403

|          |          |          |
|----------|----------|----------|
| G:0.3618 | G:0.6301 | G:0.3184 |
| G:0.0551 | G:0.0492 | G:0.0591 |
| T:0.1542 |          |          |
| C:0.2328 | T:0.7292 | T:0.7752 |
| A:0.2256 | A:0.0961 | A:0.2911 |

F27,Prints\_domain:PR01155

|          |          |          |
|----------|----------|----------|
| G:0.0176 | G:0.0635 | G:0.0043 |
| T:0.1386 | T:0.1634 | T:0.1671 |
| G:0.2574 | G:0.0764 | G:0.3674 |
| T:0.4189 | A:0.4629 | A:0.6124 |
| C:0.4810 | C:0.3306 | C:0.5634 |
| T:0.3954 | T:0.4289 | T:0.4366 |
| A:0.3229 | A:0.171  | A:0.4063 |
| T:0.3934 | T:0.4297 | T:0.4337 |
| G:0.3235 | A:0.8752 | A:0.6657 |
| C:0.3552 | T:0.8427 | T:0.6297 |
| G:0.4625 | G:0.3676 | G:0.6239 |
| A:0.0054 | A:0      | A:0.0086 |
| T:0.0010 | T:0      | T:0.0014 |
| A:0.0058 | A:0.0008 | A:0.0173 |
| C:0.1164 | C:0.0076 | C:0.098  |

city\_(Seg):seg

|          |          |          |
|----------|----------|----------|
| C:0.2282 | C:0.3041 | C:0.1412 |
| A:0.3560 | A:0.3525 | A:0.255  |
| A:0.0745 | A:0.0166 | A:0.0533 |
| G:0.4834 | G:0.5371 | G:0.4438 |
| C:0.1863 | C:0.2012 | C:0.1873 |
| G:0.1707 | G:0.0408 | G:0.2421 |
| T:0.1562 | T:0.1702 | T:0.1772 |
| C:0.3067 | C:0.5038 | C:0.2608 |
| T:0.0863 | T:0.0227 | T:0.0144 |
| T:0.0960 | T:0.1551 | T:0.098  |
| A:0.0016 | A:0      | A:0      |
| C:0.3562 | C:0.3805 | C:0.5259 |
| A:0.0026 | A:0.0015 | A:0.0014 |
| C:0.3906 | C:0.6354 | C:0.4222 |
| C:0.3213 | C:0.4047 | C:0.255  |
| C:0.2829 | T:0.8147 | T:0.6772 |
| G:0.3385 | G:0.1581 | G:0.3026 |
| T:0.4684 | C:0.8041 | C:0.3631 |
| T:0.4239 | T:0.3517 | T:0.5447 |
| G:0.0954 | G:0.2943 | G:0.0461 |
| G:0.3299 | G:0.1467 | G:0.3847 |
| A:0.2548 | G:0.9713 | G:0.6599 |
| A:0.3091 | A:0.0734 | A:0.3775 |
| T:0.0455 | T:0.0045 | T:0.0807 |

VEP annotated somatic variants

|                                                                                    |                   |                   |
|------------------------------------------------------------------------------------|-------------------|-------------------|
| G:0.0101                                                                           | G:0               | G:0.0072          |
| G:0.0002                                                                           | G:0               | G:0               |
| G:0.4860                                                                           | A:0.3684          | A:0.5677          |
| C:0.3057                                                                           | T:0.8979          | T:0.7435          |
| C:0.1404                                                                           | C:0.3192          | C:0.0648          |
| G:0.3838                                                                           | G:0.7814          | G:0.4035          |
| T:0.1919                                                                           | T:0.1475          | T:0.1801          |
| C:0.3442                                                                           | C:0.0946          | C:0.2939          |
| <br>                                                                               |                   |                   |
| G:0.3101                                                                           | G:0.2564          | G:0.3761          |
| A:0.0705                                                                           | A:0.0076          | A:0.0807          |
| G:0.3889                                                                           | A:0.5772          | A:0.451           |
| C:0.2779                                                                           | T:0.6604          | T:0.5692          |
| C:0.0813                                                                           | C:0.0424          | C:0.0951          |
| T:0.1356                                                                           | T:0.0106          | T:0.1527          |
| A:0.2518                                                                           | A:0.2799          | A:0.3818          |
| A:0.3662                                                                           | G:0.8585          | G:0.4769          |
| <br>                                                                               |                   |                   |
| T:0.4395                                                                           | G:0.7587          | G:0.4697          |
| G:0.2891                                                                           | G:0.3835          | G:0.3112          |
| T:0.1468                                                                           | T:0.0197          | T:0.1801          |
| T:0.4105                                                                           | C:0.6589          | C:0.5519          |
| C:0.1460                                                                           | C:0.1778          | C:0.1153          |
| A:0.3784                                                                           | A:0.3775          | A:0.3602          |
| T:0.1270                                                                           | T:0.0061          | T:0.2176          |
| G:0.4571                                                                           | A:0.7587          | A:0.4438          |
| -:0.2244                                                                           | AAGT:0.9319       | AAGT:0.6772       |
| T:0.4413                                                                           | T:0.6331          | T:0.3689          |
| G:0.3277                                                                           | A:0.7927          | A:0.5893          |
| T:0.3790                                                                           | C:0.7436          | C:0.562           |
| T:0.4918                                                                           | T:0.1377,T:0.1377 | T:0.5692,T:0.5692 |
| T:0.1481                                                                           | T:0.0166          | T:0.1772          |
| C:0.0030                                                                           | C:0.0008          | C:0.0058          |
| 4377,hmmpanther:PTHR24377:SF236,SMART_domains:SM00355,Superfamily_domains:SSF57667 |                   |                   |
| T:0.2682                                                                           | T:0.0734          | T:0.2594          |
| C:0.3067                                                                           | T:0.8359          | T:0.8213          |
| <br>                                                                               |                   |                   |
| C:0.3448                                                                           | C:0.6445          | C:0.2925          |
| T:0.4647                                                                           | T:0.7806          | T:0.4078          |



VEP annotated somatic variants

| EAS_MAF                                                                                                                                                                                                                                              | EUR_MAF                                                                                                                                                                                                                                                                   | SAS_MAF                                                                                                                                                                                                                                                       | AA_MAF                                                                                                                                                                                                       |
|------------------------------------------------------------------------------------------------------------------------------------------------------------------------------------------------------------------------------------------------------|---------------------------------------------------------------------------------------------------------------------------------------------------------------------------------------------------------------------------------------------------------------------------|---------------------------------------------------------------------------------------------------------------------------------------------------------------------------------------------------------------------------------------------------------------|--------------------------------------------------------------------------------------------------------------------------------------------------------------------------------------------------------------|
| C:0.001<br>C:0.6042                                                                                                                                                                                                                                  | C:0.0517<br>C:0.4811                                                                                                                                                                                                                                                      | C:0.0102<br>C:0.635                                                                                                                                                                                                                                           | C:0.0075<br><br>G:0.4163                                                                                                                                                                                     |
| G:0.4692<br>G:0.3185<br>G:0.3403                                                                                                                                                                                                                     | G:0.6849<br>G:0.6153<br>G:0.6849                                                                                                                                                                                                                                          | G:0.6687<br>G:0.5992<br>G:0.6166                                                                                                                                                                                                                              | G:0.2861<br>G:0.7435                                                                                                                                                                                         |
| T:0.0873                                                                                                                                                                                                                                             | T:0.2704                                                                                                                                                                                                                                                                  | T:0.2924                                                                                                                                                                                                                                                      | T:0.6832<br>GAGCGGGCGA:0.5586                                                                                                                                                                                |
| A:0.1488<br>C:0.87<br>T:0.001                                                                                                                                                                                                                        | A:0.2237<br>C:0.832<br>T:0.0408                                                                                                                                                                                                                                           | A:0.1472<br>C:0.7699<br>T:0.0327                                                                                                                                                                                                                              | A:0.1083<br><br>T:0.0047                                                                                                                                                                                     |
| G:0.0228<br>T:0<br>C:0.005                                                                                                                                                                                                                           | G:0.325<br>T:0.0278<br>C:0.1163                                                                                                                                                                                                                                           | G:0.2076<br>T:0.0164<br>C:0.1922                                                                                                                                                                                                                              | G:0.5419                                                                                                                                                                                                     |
| A:0.0506<br>A:0.5357<br>A:0.0258<br>T:0.0099<br>T:0.0754                                                                                                                                                                                             | A:0.0378<br>A:0.6421<br>A:0.4095<br>T:0.0895<br>T:0.5417                                                                                                                                                                                                                  | A:0.136<br>A:0.6871<br>A:0.2556<br>T:0.0358<br>T:0.2035                                                                                                                                                                                                       | A:0.4439<br>A:0.2434                                                                                                                                                                                         |
| T:0.002<br>ATAA:0.0218<br>A:0.1637<br>G:0.4256                                                                                                                                                                                                       | T:0.1928<br>ATAA:0.5099<br>A:0.2614<br>G:0.5109                                                                                                                                                                                                                           | T:0.1329<br>ATAA:0.3292<br>A:0.2157<br>G:0.4785                                                                                                                                                                                                               | T:0.204<br><br>A:0.0602<br>G:0.4133                                                                                                                                                                          |
| T:0.8909<br>G:0.0843<br>G:0.2827<br>-:0.0327<br>G:0.001<br>C:0.1071<br>C:0.6002<br>A:0<br>G:0.002<br>C:0.377<br>T:0.6865<br>C:0<br>A:0.1508<br>C:0.499<br>T:0.4464<br>T:0.2639<br>T:0,T:0<br>T:0.1002<br>C:0.256<br>T:0.1617<br>G:0.1617<br>T:0.9464 | T:0.5875<br>G:0.007<br>G:0.1461<br>-:0.0577<br>G:0.1402<br>C:0.2097<br>C:0.6083<br>A:0.0408<br>G:0.0716<br>C:0.4205<br>T:0.492<br>C:0.0467<br>A:0.338<br>C:0.1113<br>T:0.833<br>T:0.3022<br>T:0.0189,T:0.0189<br>T:0.2555<br>C:0.2724<br>T:0.3857<br>G:0.3867<br>T:0.7137 | T:0.7771<br>G:0.0245<br>G:0.2106<br>-:0.0746<br>G:0.0164<br>C:0.3804<br>C:0.4571<br>A:0.0082<br>G:0.0092<br>C:0.3947<br>T:0.5051<br>C:0.001<br>A:0.2812<br>C:0.3681<br>T:0.5603<br>T:0.136<br>T:0,T:0<br>T:0.1595<br>C:0.1646<br>T:0.41<br>G:0.41<br>T:0.8047 | T:0.5962<br>G:0.1155<br>G:0.2069<br><br>C:0.6332<br>C:0.554<br>A:0.0052<br><br>C:0.3988<br>T:0.2158<br><br>C:0.2556<br>T:0.8201<br>T:0.1676<br>T:0.0068,T:0.0068<br>T:0.0488<br><br>T:0.4788<br><br>T:0.8266 |

VEP annotated somatic variants

|          |          |          |          |
|----------|----------|----------|----------|
| A:0.005  | A:0.3191 | A:0.1053 | A:0.2068 |
| A:0.499  | A:0.16   | A:0.1329 | A:0.0458 |
| T:0.0992 | T:0.1978 | T:0.1943 |          |
| C:0.4851 | C:0.2992 | C:0.4581 |          |
| T:0.1101 | T:0.0845 | T:0.089  | T:0.064  |
| C:0.5665 | C:0.5298 | C:0.7628 |          |
| G:0.6736 | G:0.7356 | G:0.8415 | G:0.9027 |
| T:0.1587 | T:0.2256 | T:0.1861 |          |
| G:0.0784 | G:0.2922 | G:0.3006 | G:0.1207 |
| -:0.2173 | -:0.1988 | -:0.1166 | -:0.4492 |
| A:0.4841 | A:0.1441 | A:0.2311 | A:0.2757 |
| A:0.0089 | A:0.1233 | A:0.1483 |          |
| C:0.2103 | C:0.2048 | C:0.1902 |          |
| C:0.9891 | C:0.8101 | C:0.8885 | C:0.8639 |
| G:0.5645 | G:0.0885 | G:0.2249 | G:0.2511 |
| A:0      | A:0.1133 | A:0.0184 | A:0.0261 |
| T:0.0357 | T:0.0656 | T:0.0194 | T:0.0096 |
| T:0      | T:0.0408 | T:0.0112 | T:0.0072 |
|          |          |          |          |
| C:0.2976 | C:0.173  | C:0.0685 |          |
| C:0      | C:0.003  | C:0      | C:0.0008 |
|          |          |          |          |
| T:0.0813 | T:0.172  | T:0.0521 |          |
|          |          |          |          |
| G:0.0357 | G:0.3519 | G:0.1258 |          |
| G:0.0357 | G:0.3559 | G:0.1278 |          |
| G:0.3869 | G:0.1918 | G:0.3384 |          |
| T:0.001  | T:0.0298 | T:0.0399 | T:0.0057 |
|          |          |          |          |
| G:0.0605 | G:0.0696 | G:0.0266 | G:0.0132 |
| G:0.0982 | G:0.2684 | G:0.2791 | G:0.4142 |
| C:0.0903 | C:0.0765 | C:0.1861 | C:0.3468 |
| T:0      | T:0.0586 | T:0.002  | T:0.0132 |
| T:0.001  | T:0.0517 | T:0.093  |          |
| A:0.6657 | A:0.8698 | A:0.8517 |          |
| G:0.0208 | G:0.1083 | G:0.093  |          |
| C:0.4206 | C:0.2863 | C:0.2812 | C:0.5241 |
| C:0.6825 | C:0.174  | C:0.271  | C:0.0506 |
| G:0.1677 | G:0.3141 | G:0.4346 |          |
| A:0      | A:0.0905 | A:0.0133 | A:0.0136 |
| T:0.7837 | T:0.5308 | T:0.5613 | T:0.6763 |
| T:0.369  | T:0.5437 | T:0.3722 |          |
| G:0.3631 | G:0.5417 | G:0.3701 |          |
| A:0.3423 | A:0.5179 | A:0.3016 |          |
| T:0.3423 | T:0.5179 | T:0.3006 |          |
| G:0.003  | G:0.2137 | G:0.1186 | G:0.0835 |
| A:0.124  | A:0.1799 | A:0.1483 |          |
| A:0.124  | A:0.1829 | A:0.1503 | A:0.1739 |
| A:0      | A:0.0626 | A:0.0123 | A:0.017  |
|          |          |          |          |
| T:0.0853 | T:0.2594 | T:0.1933 | T:0.2736 |
| G:0.002  | G:0.2913 | G:0.1483 |          |
| -:0.002  | -:0.0437 | -:0.0583 | -:0.0265 |

VEP annotated somatic variants

|          |          |          |          |
|----------|----------|----------|----------|
| A:0.7659 | A:0.6342 | A:0.4918 |          |
| T:0.255  | T:0.5586 | T:0.4264 | T:0.3626 |
| A:0.6081 | A:0.3579 | A:0.2393 | A:0.2215 |
| G:0.6429 | G:0.3598 | G:0.2515 | G:0.3447 |
| C:0.4018 | C:0.0795 | C:0.4622 |          |
| A:0.9861 | A:0.5845 | A:0.6534 | A:0.781  |
| G:0.0169 | G:0.1372 | G:0.1933 | G:0.2964 |
| C:0      | C:0.0487 | C:0.0072 | C:0.0254 |
| A:0.0357 | A:0.2505 | A:0.135  |          |
| A:0      | A:0.0398 | A:0.0123 | A:0.0565 |
| T:0.0615 | T:0.0934 | T:0.0736 | T:0.0222 |
| G:0.7054 | G:0.3529 | G:0.2761 | G:0.2787 |
| G:0.0863 | G:0.0775 | G:0.0665 | G:0.1491 |
| T:0.1984 | T:0.2584 | T:0.2464 |          |
| A:0.2431 | A:0.1759 | A:0.2587 | A:0.357  |
| A:0.004  | A:0.2734 | A:0.1769 |          |
| A:0.0972 | A:0.3022 | A:0.228  | A:0.2047 |
| G:0.3145 | G:0.4821 | G:0.3067 | G:0.4678 |
| T:0.3075 | T:0.2624 | T:0.5215 | T:0.2139 |
| T:0.7579 | T:0.6958 | T:0.7331 | T:0.9664 |
| G:0.38   | G:0.2823 | G:0.3916 | G:0.1713 |
| C:0.0526 | C:0.2783 | C:0.1871 | C:0.2803 |
| C:0.1597 | C:0.3857 | C:0.3272 |          |
| A:0.505  | A:0.7783 | A:0.7157 | A:0.8772 |
| T:0.122  | T:0.2594 | T:0.1186 |          |
| A:0.6597 | A:0.3191 | A:0.4601 | A:0.5626 |
| G:0.0466 | G:0.1362 | G:0.1431 | G:0.0395 |
| C:0      | C:0.0736 | C:0.0143 |          |
| T:0.001  | T:0.1471 | T:0.044  | T:0.2276 |
| T:0.001  | T:0.0825 | T:0.0204 |          |
| A:0.0377 | A:0.4523 | A:0.2035 |          |
| G:0      | G:0.0507 | G:0.0389 | G:0.0113 |
| A:0.1032 | A:0.3221 | A:0.2802 |          |
| T:0      | T:0.002  | T:0      | T:0.0023 |
| T:0.371  | T:0.3598 | T:0.499  |          |
| T:0.372  | T:0.2744 | T:0.4693 |          |
| C:0.371  | C:0.3579 | C:0.4969 |          |
| T:0.0794 | T:0.1938 | T:0.1452 |          |
| T:0.001  | T:0.1491 | T:0.0215 | T:0.0361 |
| A:0.0367 | A:0.3171 | A:0.1769 | A:0.3034 |
| G:0.0367 | G:0.0447 | G:0.0644 | G:0.0484 |
| C:0.2302 | C:0.1153 | C:0.2883 | C:0.1359 |
| T:0.2302 | T:0.1103 | T:0.2689 |          |
| T:0.2639 | T:0.1541 | T:0.2648 |          |
| A:0.1687 | A:0.1044 | A:0.1401 | A:0.0263 |
| T:0.7659 | T:0.7376 | T:0.593  | T:0.5134 |
| G:0.249  | G:0.33   | G:0.2423 | G:0.3058 |

VEP annotated somatic variants

|                   |                   |                   |                   |
|-------------------|-------------------|-------------------|-------------------|
| C:0.4127          | C:0.333           | C:0.3384          | C:0.1727          |
| A:0.5228          | A:0.5378          | A:0.6595          |                   |
| A:0.0694          | A:0.16            | A:0.3661          |                   |
| C:0.001           | C:0.0746          | C:0.0082          | C:0.0104          |
| T:0.248           | T:0.4145          | T:0.4877          |                   |
| -:0.0823          | -:0.1431          | -:0.2413          | -:0.2603          |
| -:0.0188          | -:0.0109          | -:0.0808          |                   |
| A:0.0585          | A:0.0964          | A:0.0256          | A:0.1207          |
| C:0.6944          | C:0.3022          | C:0.318           | C:0.6825          |
| C:0.9911          | C:0.4911          | C:0.6258          | C:0.5869          |
| C:0.5139          | C:0.2803          | C:0.4162          | C:0.2009          |
| T:0.0853,T:0.0853 | T:0.1809,T:0.1809 | T:0.2055,T:0.2055 |                   |
| G:0.373           | G:0.0785          | G:0.1728          | G:0.3842          |
| -:0.0645          | -:0.0507          | -:0.0624          |                   |
| C:0               | C:0.1789          | C:0.1115          |                   |
| C:0.2659          | C:0.1292          | C:0.2566          | C:0.0622          |
| C:0.5724          | C:0.174           | C:0.3384          | C:0.2953          |
|                   |                   |                   |                   |
| T:0.8512          | T:0.6272          | T:0.7209          | T:0.7047          |
|                   |                   |                   |                   |
| G:0.0357          | G:0.0875          | G:0.1033          | G:0.0338          |
| C:0.2431          | C:0.1899          | C:0.1442          | C:0.5738          |
| C:0.3681          | C:0.3519          | C:0.3272          |                   |
| T:0               | T:0               | T:0               |                   |
| G:0.372           | G:0.2266          | G:0.4131          |                   |
| A:0               | A:0.0179          | A:0.001           | A:0.0025          |
| T:0               | T:0.002           | T:0               | T:0.0007          |
|                   |                   |                   |                   |
| C:0.6538          | C:0.1809          | C:0.3569          | C:0.5432          |
| T:0               | T:0.0278          | T:0.0112          |                   |
|                   |                   |                   |                   |
| G:0.0605          | G:0.1203          | G:0.1155          | G:0.0222          |
| C:0.0347          | C:0.1064          | C:0.0532          |                   |
| C:0               | C:0.002           | C:0               |                   |
| T:0.0724          | T:0.16            | T:0.3671          |                   |
|                   |                   |                   |                   |
| A:0               | A:0.0109          | A:0.0072          | A:0.0002          |
| A:0.2956          | A:0.332           | A:0.1513          |                   |
| T:0.0218          | T:0.1849          | T:0.2628          | T:0.4076          |
| T:0.002           | T:0.161           | T:0.0245          | T:0.0751          |
| T:0.6597          | T:0.3698          | T:0.5194          |                   |
| T:0.1657          | T:0.3966          | T:0.2505          |                   |
| T:0               | T:0.0119          | T:0.0041          | T:0.0009          |
| C:0.1458          | C:0.3201          | C:0.3446          | C:0.3056          |
| A:0.4851          | A:0.34            | A:0.3241          | A:0.2089          |
| T:0.3978          | T:0.3579          | T:0.272           |                   |
| C:0.0893          | C:0.1431          | C:0.3241          |                   |
|                   |                   |                   |                   |
| G:0.3998          | G:0.2475          | G:0.3885          | G:0.1221          |
| T:0.006,T:0.006   | T:0.1302,T:0.1302 | T:0.0266,T:0.0266 | T:0.0266,T:0.0266 |
| T:0               | T:0.0258          | T:0.001           | T:0.0057          |
| -:0.0933          | -:0.5229          | -:0.2106          | -:0.3147          |
| A:0.5367          | A:0.2535          | A:0.3865          | A:0.111           |

VEP annotated somatic variants

|            |            |           |          |
|------------|------------|-----------|----------|
| A:0.2133   | A:0.2883   | A:0.3313  | A:0.3586 |
| G:0        | G:0.002    | G:0       | G:0.0008 |
| C:0        | C:0.0199   | C:0.0204  |          |
| G:0        | G:0.001    | G:0       | G:0.0005 |
| T:0.1389   | T:0.1829   | T:0.1728  |          |
| A:0        | A:0.1909   | A:0.0256  | A:0.1748 |
| A:0.0565   | A:0.1998   | A:0.1401  | A:0.095  |
| A:0.2371   | A:0.1332   | A:0.1861  | A:0.1015 |
| T:0.0685   | T:0.2097   | T:0.2444  |          |
| A:0        | A:0.1332   | A:0.0123  | A:0.0282 |
| G:0.4087   | G:0.339    | G:0.2178  | G:0.4655 |
| -:0.0625   | -:0.3231   | -:0.183   | -:0.1313 |
| G:0.4583   | G:0.6044   | G:0.592   | G:0.3745 |
| -:0.1706   | -:0.1272   | -:0.1718  |          |
| C:0.4613   | C:0.1322   | C:0.2781  | C:0.2708 |
| G:0.0099   | G:0.2028   | G:0.1421  |          |
|            |            |           | -:0.0113 |
| T:0        | T:0.001    | T:0       |          |
| C:0.9464   | C:0.3857   | C:0.5603  | C:0.5809 |
| T:0.3125   | T:0.4314   | T:0.407   | T:0.086  |
| C:0.9554   | C:0.6292   | C:0.8344  | C:0.5676 |
|            |            |           | T:0.0002 |
| C:0.3879   | C:0.2445   | C:0.3814  |          |
| A:0        | A:0.0318   | A:0.002   | A:0.0052 |
| G:0.1627   | G:0.1998   | G:0.1687  | G:0.2186 |
| G:0        | G:0        | G:0       |          |
| A:0        | A:0.0099   | A:0       | A:0.2109 |
| A:0.3393   | A:0.2137   | A:0.0695  | A:0.1281 |
| G:0.506    | G:0.3519   | G:0.3067  | G:0.5321 |
| A:0        | A:0.0258   | A:0.0143  |          |
| AAG:0.5367 | AAG:0.3767 | AAG:0.362 |          |
| T:0.87     | T:0.7117   | T:0.6288  |          |
| C:0.4256   | C:0.165    | C:0.1708  |          |
| A:0.4444   | A:0.1193   | A:0.1012  | A:0.1244 |
| C:0.4573   | C:0.2237   | C:0.1779  |          |
| C:0.2669   | C:0.2833   | C:0.2168  | C:0.1011 |
| -:0.2034   | -:0.1849   | -:0.2587  | -:0.2486 |
| T:0        | T:0.1093   | T:0.0654  | T:0.0322 |
| T:0        | T:0.006    | T:0       |          |
| C:0.8214   | C:0.6899   | C:0.6012  |          |
| T:0.8313   | T:0.6918   | T:0.7035  | T:0.5849 |
| T:0.9425   | T:0.5338   | T:0.7147  | T:0.597  |
| G:0.375    | G:0.2058   | G:0.2577  |          |
| T:0.9514   | T:0.6382   | T:0.7127  |          |
| A:0.0149   | A:0.2525   | A:0.2331  | A:0.2444 |
|            |            |           | C:0.0272 |
| A:0.2272   | A:0.1223   | A:0.1012  |          |

VEP annotated somatic variants

|          |          |          |          |
|----------|----------|----------|----------|
| C:0.1935 | C:0.2783 | C:0.3589 | C:0.2074 |
| T:0.0089 | T:0.1223 | T:0.1513 | T:0.0415 |
| C:0.6538 | C:0.1839 | C:0.3252 |          |
| A:0.0992 | A:0.0765 | A:0.1329 | A:0.2705 |
| T:0.3671 | T:0.5696 | T:0.4376 | T:0.4037 |
| A:0.4861 | A:0.332  | A:0.2434 | A:0.1112 |
| T:0.0099 | T:0.2982 | T:0.181  |          |
| C:0.3591 | C:0.6551 | C:0.6401 | C:0.9742 |
| C:0      | C:0.0427 | C:0.0072 | C:0.0082 |
| A:0.006  | A:0.0755 | A:0.0481 |          |
| C:0.0605 | C:0.1759 | C:0.0368 |          |
| G:0.2063 | G:0.1481 | G:0.2076 | G:0.5544 |
| T:0.4494 | T:0.1044 | T:0.2485 | T:0.0372 |
| A:0.876  | A:0.9085 | A:0.8425 | A:0.8239 |
| A:0.4405 | A:0.7386 | A:0.6145 |          |
| A:0.5704 | A:0.3211 | A:0.4509 | A:0.6046 |
| G:0.4048 | G:0.4274 | G:0.4826 |          |
| T:0.0764 | T:0.2584 | T:0.1748 | T:0.0713 |
| A:0.2827 | A:0.3469 | A:0.3436 |          |
| C:0.3085 | C:0.4066 | C:0.3344 | C:0.4092 |
| G:0.2907 | G:0.1859 | G:0.2464 | G:0.1387 |
| G:0.0337 | G:0.1014 | G:0.1094 |          |
| T:0      | T:0.005  | T:0.001  | T:0.0032 |
| G:0.5823 | G:0.4215 | G:0.7106 | G:0.5639 |
| G:0.3105 | G:0.2734 | G:0.1462 | G:0.0924 |
| A:0.4286 | A:0.4841 | A:0.4796 | A:0.5036 |
| C:0.4097 | C:0.159  | C:0.3446 | C:0.2796 |
| A:0.4405 | A:0.0268 | A:0.1708 | A:0.1582 |
| A:0.2401 | A:0.3728 | A:0.3272 | A:0.3487 |
| C:0.4821 | C:0.1759 | C:0.3088 | C:0.2355 |
| C:0.7083 | C:0.5    | C:0.4499 | C:0.3858 |
| G:0.3413 | G:0.4026 | G:0.3149 | G:0.1961 |
| G:0.0119 | G:0.2058 | G:0.1483 | G:0.3992 |
| A:0.0675 | A:0.2873 | A:0.0992 |          |
| G:0.002  | G:0.0716 | G:0.0491 | G:0.0967 |
| A:0.381  | A:0.3877 | A:0.3313 |          |
| G:0      | G:0.003  | G:0.0256 | G:0.0009 |
| C:0.001  | C:0      | C:0      |          |
| A:0.5685 | A:0.1491 | A:0.2761 |          |
| T:0.1875 | T:0.1103 | T:0.1176 | T:0.1936 |
| T:0      | T:0.0089 | T:0.001  | T:0.0023 |
| C:0.6776 | C:0.5089 | C:0.5082 |          |
| T:0.6766 | T:0.5099 | T:0.5082 |          |
|          |          |          | A:0.3703 |

VEP annotated somatic variants

|           |           |           |          |
|-----------|-----------|-----------|----------|
| G:0.2728  | G:0.5209  | G:0.4581  | G:0.2696 |
| A:0.3988  | A:0.499   | A:0.4479  | A:0.1568 |
| T:0.1319  | T:0.2247  | T:0.136   |          |
| C:0.5149  | C:0.2942  | C:0.409   | C:0.7819 |
| T:0.3145  | T:0.2674  | T:0.1646  | T:0.0579 |
| A:0.0179  | A:0.0527  | A:0.2219  | A:0.012  |
| G:0.3274  | G:0.3618  | G:0.3292  |          |
| G:0       | G:0.0139  | G:0.0031  | G:0.003  |
| G:0.0159  | G:0.1531  | G:0.228   |          |
| T:0.5327  | T:0.7137  | T:0.7014  | T:0.6212 |
| T:0.5317  | T:0.7117  | T:0.6984  | T:0.623  |
| A:0.002   | A:0.2227  | A:0.0419  | A:0.1751 |
| A:0.1042  | A:0.0835  | A:0.0746  |          |
| G:0.0685  | G:0.1103  | G:0.1667  |          |
| T:0.0685  | T:0.1093  | T:0.1667  |          |
| T:0.0109  | T:0.2584  | T:0.1984  | T:0.3442 |
| A:0.5317  | A:0.4781  | A:0.5562  | A:0.7579 |
| A:0.4643  | A:0.2416  | A:0.2751  | A:0.225  |
| C:0.628   | C:0.4145  | C:0.7065  | C:0.7948 |
| G:0.5456  | G:0.6819  | G:0.5982  | G:0.5004 |
| C:0.4692  | C:0.3946  | C:0.4632  |          |
| C:0.131   | C:0.1581  | C:0.1595  | C:0.2472 |
| A:0.13    | A:0.1511  | A:0.1431  |          |
| G:0.0337  | G:0.3996  | G:0.1626  | G:0.1123 |
| A:0.0417  | A:0.1451  | A:0.1554  | A:0.1434 |
| G:0.2202  | G:0.2913  | G:0.2239  | G:0.5116 |
| C:0       | C:0.002   | C:0       |          |
| C:0.8125  | C:0.4314  | C:0.5757  |          |
| T:0       | T:0.1431  | T:0.0225  | T:0.0311 |
| C:0.6548  | C:0.6839  | C:0.684   |          |
| G:0.4573  | G:0.2773  | G:0.5511  | G:0.221  |
| A:0.3442  | A:0.3539  | A:0.4233  |          |
| T:0.3591  | T:0.5239  | T:0.6104  | A:0      |
| TG:0.5238 | TG:0.3529 | TG:0.3354 | T:0.1748 |
| T:0.4256  | T:0.3241  | T:0.3824  | T:0.5225 |
| C:0.3234  | C:0.2316  | C:0.2331  |          |
| G:0.3244  | G:0.2256  | G:0.2301  |          |
| A:0.3244  | A:0.2276  | A:0.2301  | A:0.1437 |
| C:0       | C:0.001   | C:0       |          |
| -:0.3204  | -:0.0835  | -:0.1155  |          |
| G:0.4226  | G:0.3847  | G:0.4029  | G:0.2247 |
| T:0.0337  | T:0.336   | T:0.2434  |          |
| A:0.1657  | A:0.1243  | A:0.2771  |          |
| G:0.0208  | G:0.0249  | G:0.0593  |          |
| G:0.2579  | G:0.3847  | G:0.4162  |          |
| T:0       | T:0.003   | T:0.001   | T:0.0011 |
| T:0.0744  | T:0.1431  | T:0.0603  |          |

VEP annotated somatic variants

|                                                                                                            |                                                                                                                      |                                                                                                                     |                                                                                                                     |
|------------------------------------------------------------------------------------------------------------|----------------------------------------------------------------------------------------------------------------------|---------------------------------------------------------------------------------------------------------------------|---------------------------------------------------------------------------------------------------------------------|
| T:0.4355<br>G:0.125                                                                                        | T:0.2276<br>G:0.1074                                                                                                 | T:0.227<br>G:0.273                                                                                                  | T:0.3743<br>G:0.0208                                                                                                |
| G:0.4177<br>T:0.4415<br>G:0.4484<br>G:0.4415<br>G:0.0079<br>G:0.0089                                       | G:0.5517<br>T:0.332<br>G:0.3598<br>G:0.332<br>G:0.0557<br>G:0.0557                                                   | G:0.5665<br>T:0.4468<br>G:0.4683<br>G:0.4468<br>G:0.0603<br>G:0.0603                                                | G:0.4508<br><br>G:0.1474<br><br>G:0.0079                                                                            |
| C:0.1806<br>C:0.0089<br>A:0.0089                                                                           | C:0.3429<br>C:0.0547<br>A:0.0328                                                                                     | C:0.3088<br>C:0.0348<br>A:0.0041                                                                                    | C:0.0842<br>C:0.0177<br>A:0.0051                                                                                    |
| G:0.5863<br>T:0.3562<br>A:0.122<br>C:0.3562<br>C:0.9018                                                    | G:0.3897<br>T:0.0199<br>A:0.0189<br>C:0.2505<br>C:0.668                                                              | G:0.3865<br>T:0.0419<br>A:0.1247<br>C:0.272<br>C:0.7628                                                             | G:0.5079<br><br>A:0.2016<br>C:0.1102<br>C:0.9206                                                                    |
| T:0.0129<br>A:0.0833<br>T:0.1855<br>C:0.1806<br>A:0.2083<br>A:0.2331<br>-:0<br>A:0.8988<br>T:0.1081<br>T:0 | T:0.1869<br>A:0.0457<br>T:0.2942<br>C:0.2942<br>A:0.3002<br>A:0.2127<br>-:0.0258<br>A:0.7485<br>T:0.1382<br>T:0.0348 | T:0.0716<br>A:0.0736<br>T:0.0941<br>C:0.1002<br>A:0.1155<br>A:0.3067<br>-:0.002<br>A:0.7137<br>T:0.1472<br>T:0.0051 | T:0.0983<br>A:0.0129<br>T:0.3252<br>C:0.3213<br>A:0.732<br>A:0.1336<br>-:0.0032<br>A:0.6947<br>T:0.1369<br>T:0.0068 |
| A:0.4107<br><br>C:0<br>A:0.2302<br>C:0.4385<br>C:0.0248<br>A:0.001<br>C:0.4573<br>G:0                      | A:0.5447<br><br>C:0.0109<br>A:0.2495<br>C:0.2843<br>C:0.2018<br>A:0.1024<br>C:0.5209<br>G:0.2903                     | A:0.5051<br><br>C:0.0031<br>A:0.2955<br>C:0.3333<br>C:0.1861<br>A:0.0798<br>C:0.4335<br>G:0.1462                    | C:0<br>C:0.0055<br>A:0.1453<br>C:0.7139<br>C:0.3831<br>A:0.0354                                                     |
| A:0<br>G:0.2698<br>A:0<br>T:0.6062                                                                         | A:0.0785<br>G:0.4503<br>A:0.1252<br>T:0.4682                                                                         | A:0.0378<br>G:0.3589<br>A:0.0409<br>T:0.6636                                                                        | A:0.015<br>G:0.2221<br>A:0.0302                                                                                     |
| T:0.5446                                                                                                   | T:0.4672                                                                                                             | T:0.3732                                                                                                            | T:0.0969                                                                                                            |
| T:0.0218<br>C:0.2649                                                                                       | T:0.3141<br>C:0.327                                                                                                  | T:0.1564<br>C:0.5838                                                                                                |                                                                                                                     |
| G:0<br>-:0.119<br>A:0.3948                                                                                 | G:0.0268<br>-:0.1272<br>A:0.2773                                                                                     | G:0.0041<br>-:0.3047<br>A:0.3528                                                                                    | -:0.1621<br>A:0.0717                                                                                                |



VEP annotated somatic variants

|          |          |          |          |
|----------|----------|----------|----------|
| T:0.0149 | T:0.2435 | T:0.1227 | T:0.0505 |
| T:0      | T:0.0189 | T:0.0051 |          |
| G:0.5565 | G:0.5895 | G:0.68   | G:0.8092 |
| T:0.2698 | T:0.5328 | T:0.1288 | T:0.1937 |
| T:0.1002 | T:0.2286 | T:0.1789 | T:0.0713 |
| A:0.3522 | A:0.4274 | A:0.2914 | A:0.4698 |
| T:0.3502 | T:0.3608 | T:0.2618 | T:0.5089 |
| G:0.3492 | G:0.3698 | G:0.273  | G:0.6158 |
| T:0.1181 | T:0.4235 | T:0.2382 | T:0.1395 |
| G:0.7401 | G:0.3469 | G:0.4601 | G:0.6836 |
| T:0.5526 | T:0.659  | T:0.7914 |          |
| G:0.5526 | G:0.659  | G:0.7904 |          |
| C:0.5923 | C:0.5795 | C:0.502  | C:0.8697 |
| C:0.5903 | C:0.4702 | C:0.4294 | C:0.0844 |
| G:0.5913 | G:0.4702 | G:0.4305 | G:0.1035 |
| T:0.0397 | T:0.0497 | T:0.0634 | T:0.0227 |
| G:0.6905 | G:0.4394 | G:0.4029 |          |
| C:0      | C:0.0149 | C:0.0245 | C:0.0041 |
| T:0.1488 | T:0.0775 | T:0.3037 |          |
| T:0      | T:0      | T:0      |          |
| A:0.0278 | A:0.0755 | A:0.0092 | A:0.4409 |
| G:0.1181 | G:0.164  | G:0.2342 |          |
| T:0.001  | T:0.0845 | T:0.0624 | T:0.0815 |
| A:0.3333 | A:0.1402 | A:0.18   | A:0.1707 |
| G:0.8194 | G:0.6382 | G:0.773  |          |
| A:0.5347 | A:0.4374 | A:0.4785 | A:0.1084 |
| A:0.0585 | A:0.0885 | A:0.0818 | A:0.0171 |
| A:0.2887 | A:0.5686 | A:0.3088 | A:0.5089 |
| T:0.131  | T:0.1998 | T:0.1401 | T:0.1417 |
| T:0      | T:0.1491 | T:0.0767 |          |
| T:0.4583 | T:0.3618 | T:0.7157 | T:0.2024 |
| T:0.4732 | T:0.3429 | T:0.7137 |          |
| T:0.004  | T:0.2177 | T:0.2065 |          |
| T:0      | T:0.0318 | T:0.002  | T:0.0052 |
| A:0.2312 | A:0.3688 | A:0.2618 | A:0.475  |
| C:0.001  | C:0.1412 | C:0.1186 | C:0.1432 |
|          |          |          | C:0.6498 |
| T:0.0327 | T:0.0706 | T:0.0245 | T:0.1484 |
| A:0.2946 | A:0.2147 | A:0.2863 | A:0.5849 |
| G:0.1468 | G:0.1968 | G:0.0838 | G:0.052  |
| G:0.3046 | G:0.1829 | G:0.2812 | G:0.0879 |
| G:0.504  | G:0.5199 | G:0.499  |          |
| A:0.5218 | A:0.2724 | A:0.4591 | A:0.7431 |
| C:0.4504 | C:0.5765 | C:0.4407 | C:0.7354 |
| T:0.1855 | T:0.332  | T:0.0706 |          |
| C:0.0099 | C:0.16   | C:0.1401 | C:0.1049 |
| A:0      | A:0.0199 | A:0      | A:0.0024 |
| A:0.0278 | A:0.0915 | A:0.0327 | A:0.0347 |

VEP annotated somatic variants

|                   |                   |                   |                   |
|-------------------|-------------------|-------------------|-------------------|
| T:0.6319          | T:0.3608          | T:0.636           |                   |
| G:0.8552          | G:0.6382          | G:0.5726          |                   |
| G:0.001           | G:0.0398          | G:0.0389          |                   |
| A:0.6974          | A:0.2704          | A:0.3456          |                   |
| G:0.1081          | G:0.338           | G:0.2791          | G:0.1685          |
| A:0.8413          | A:0.83            | A:0.8834          | A:0.7553          |
| G:0.6944          | G:0.3002          | G:0.4427          | G:0.198           |
| T:0               | T:0.0338          | T:0.0112          | T:0.004           |
| G:0.7123          | G:0.6779          | G:0.7648          | G:0.8568          |
| G:0.5446,G:0.5446 | G:0.6521,G:0.6521 | G:0.6984,G:0.6984 |                   |
| C:0.7133,C:0.7133 | C:0.6779,C:0.6779 | C:0.7669,C:0.7669 | C:0.8604,C:0.8604 |
| C:0.5754          | C:0.4742          | C:0.4519          | C:0.3695          |
| C:0.4157          | C:0.1899          | C:0.2454          | C:0.1031          |
| T:0.4137          | T:0.2286          | T:0.2505          |                   |
| A:0.004           | A:0.172           | A:0.0706          | A:0.0378          |
| A:0.0506          | A:0.1859          | A:0.0828          | A:0.0364          |
| A:0.0506          | A:0.1859          | A:0.0828          | A:0.0531          |
| T:0.0565          | T:0.1998          | T:0.1421          |                   |
| T:0               | T:0               | T:0               | T:0.0002          |
| C:0               | C:0.1163          | C:0.1012          | C:0.0191          |
| A:0.4067          | A:0.2823          | A:0.316           | A:0.591           |
| A:0.2589          | A:0.2565          | A:0.317           | A:0.2132          |
| A:0.4097          | A:0.2942          | A:0.3292          | A:0.2908          |
| G:0.0516          | G:0.0944          | G:0.1851          |                   |
| A:0               | A:0               | A:0.001           |                   |
| T:0.3373          | T:0.4722          | T:0.3088          |                   |
| T:0.126           | T:0.3022          | T:0.1738          |                   |
| A:0.7778          | A:0.4006          | A:0.5746          | A:0.5499          |
| A:0.4633          | A:0.2942          | A:0.3855          |                   |
| A:0.8095          | A:0.6769          | A:0.5971          | A:0.7501          |
| C:0.1835          | C:0.2833          | C:0.4438          |                   |
| T:0.3194          | T:0.3161          | T:0.4622          | T:0.1886          |
| T:0.4256          | T:0.5139          | T:0.547           |                   |
| T:0.001           | T:0.0179          | T:0.0348          | T:0.005           |
| A:0.0784          | A:0.0686          | A:0.0092          | A:0.016           |
| A:0.6736          | A:0.2147          | A:0.3763          | A:0.5356          |
| A:0               | A:0.0119          | A:0               | A:0.0025          |
| G:0.0208          | G:0.2913          | G:0.135           |                   |
| GGTTACCCTA:0.5665 | GGTTACCCTA:0.7048 | GGTTACCCTA:0.6575 |                   |
| C:0.251           | C:0.2237          | C:0.2045          |                   |
| T:0.1944          | T:0.0636          | T:0.2055          | T:0.0806          |
| :-0.4345          | :-0.4304          | :-0.5317          | :-0.1024          |
| T:0.4355          | T:0.4304          | T:0.5337          |                   |
| T:0.6577          | T:0.7495          | T:0.6237          | T:0.5589          |
| G:0.2768          | G:0.7724          | G:0.5838          | G:0.3657          |
| C:0.2698          | C:0.2336          | C:0.2086          | C:0.1484          |
| A:0.122           | A:0.3082          | A:0.3262          |                   |
| C:0.6905          | C:0.3907          | C:0.3967          |                   |
| G:0.3214          | G:0.3608          | G:0.3149          | C:0.8646          |

VEP annotated somatic variants

|          |          |          |          |
|----------|----------|----------|----------|
| T:0.3284 | T:0.3608 | T:0.2761 | T:0.1759 |
| A:0.001  | A:0.3181 | A:0.0634 | A:0.1897 |
| T:0.2728 | T:0.3489 | T:0.3088 | T:0.1131 |
| T:0.0437 | T:0.3469 | T:0.318  | T:0.2811 |
| T:0.0526 | T:0.0954 | T:0.0746 |          |
| A:0.375  | A:0.169  | A:0.2781 |          |
| T:0      | T:0.0169 | T:0      | T:0.0014 |
| A:0.6776 | A:0.3688 | A:0.6442 | A:0.8349 |
| C:0.2927 | C:0.4433 | C:0.3027 | C:0.2904 |
| C:0.5546 | C:0.5706 | C:0.5337 | C:0.3035 |
| C:0.6667 | C:0.5557 | C:0.7311 |          |
| T:0.1954 | T:0.3131 | T:0.2014 | T:0.2027 |
| T:0.2817 | T:0.3887 | T:0.4305 | T:0.36   |
| -:0.1032 | -:0.1213 | -:0.2147 |          |
| A:0.6994 | A:0.5119 | A:0.5818 | A:0.239  |
| G:0.005  | G:0.1551 | G:0.0951 |          |
| T:0      | T:0.0258 | T:0.0051 | T:0.0059 |
| G:0.25   | G:0.3549 | G:0.3241 | G:0.2268 |
| T:0.1984 | T:0.2614 | T:0.2209 | T:0.1639 |
| G:0.3611 | G:0.3777 | G:0.228  | G:0.4653 |
| T:0.3611 | T:0.4225 | T:0.2464 | T:0.2962 |
| C:0.0397 | C:0.0388 | C:0.0164 | C:0.2422 |
| A:0      | A:0.0388 | A:0.0143 | A:0.1625 |
| T:0      | T:0.0388 | T:0.0143 |          |
| A:0.246  | A:0.1223 | A:0.1585 |          |
| T:0.2411 | T:0.1581 | T:0.1677 | T:0.0556 |
| A:0.245  | A:0.1581 | A:0.1677 | A:0.0554 |
| T:0.1379 | T:0.1521 | T:0.0675 | T:0.0903 |
| G:0.0079 | G:0.1471 | G:0.0419 | G:0.0345 |
| G:0.5397 | G:0.2783 | G:0.3978 | G:0.1534 |
| G:0.4246 | G:0.2028 | G:0.4233 |          |
| C:0.0079 | C:0.0746 | C:0.1769 | C:0.1882 |
| G:0.2331 | G:0.2783 | G:0.2751 | G:0.1113 |
| G:0      | G:0.001  | G:0.002  | G:0.0007 |
| T:0.1121 | T:0.3121 | T:0.2618 | T:0.0615 |
| G:0.4514 | G:0.1074 | G:0.226  | G:0.0592 |
| A:0.2649 | A:0.0606 | A:0.1728 | A:0.0124 |
| A:0.001  | A:0.0586 | A:0.0031 | A:0.0114 |
| A:0      | A:0.0109 | A:0.0164 | A:0.0011 |
| A:0.0069 | A:0.4592 | A:0.2945 | A:0.1568 |
| A:0.1548 | A:0.1382 | A:0.0798 | A:0.0673 |
| A:0.1687 | A:0.3539 | A:0.2178 | A:0.2773 |
| A:0.5833 | A:0.4911 | A:0.5041 | A:0.6714 |
| C:0.7579 | C:0.7197 | C:0.7342 | C:0.992  |
| G:0      | G:0.1123 | G:0.0235 | G:0.0417 |
| A:0.3234 | A:0.0954 | A:0.0982 | A:0.0229 |
| C:0.4841 | C:0.2018 | C:0.3855 |          |
| T:0.6706 | T:0.4622 | T:0.5654 |          |
| T:0.3601 | T:0.2495 | T:0.1984 | T:0.1523 |
| T:0.0913 | T:0.1968 | T:0.2894 | T:0.054  |
| A:0.0069 | A:0.0815 | A:0.0675 | A:0.1058 |
| A:0.1944 | A:0.2883 | A:0.407  | A:0.3125 |

VEP annotated somatic variants

|                                                                                                                                           |                                                                                                                                                      |                                                                                                                                                       |                                                                                  |
|-------------------------------------------------------------------------------------------------------------------------------------------|------------------------------------------------------------------------------------------------------------------------------------------------------|-------------------------------------------------------------------------------------------------------------------------------------------------------|----------------------------------------------------------------------------------|
| C:0.255<br>A:0.2897<br>G:0.5337                                                                                                           | C:0.1252<br>A:0.0765<br>G:0.5507                                                                                                                     | C:0.1155<br>A:0.2331<br>G:0.5675                                                                                                                      | C:0.1953<br>A:0.1035                                                             |
| A:0.2619<br>C:0.6538<br>T:0<br>A:0.5893<br>A:0.4911<br>G:0.244<br>C:0.1746<br>A:0.122<br>A:0.4226<br>T:0.0169<br>A:0                      | A:0.3678<br>C:0.4891<br>T:0.0189<br>A:0.2674<br>A:0.163<br>G:0.0437<br>C:0.3141<br>A:0.2425<br>A:0.4881<br>T:0.3042<br>A:0.0139                      | A:0.1278<br>C:0.5429<br>T:0.0051<br>A:0.5<br>A:0.3047<br>G:0.047<br>C:0.4683<br>A:0.1605<br>A:0.4417<br>T:0.184<br>A:0.001                            | A:0.0767<br>C:0.745<br>A:0.2417<br>A:0.2506<br>G:0.1263<br>C:0.1009<br>A:0.0043  |
| A:0.7897<br>A:0.003<br>T:0.1379<br>C:0.002<br>T:0<br>T:0.7044<br>T:0.1468<br>T:0<br>T:0.001<br>T:0.001<br>A:0.496<br>A:0.5268<br>C:0.4167 | A:0.6252<br>A:0.2346<br>T:0.2932<br>C:0.16<br>T:0.0308<br>T:0.5199<br>T:0.333<br>T:0.0318<br>T:0.2107<br>T:0.2087<br>A:0.1382<br>A:0.5905<br>C:0.336 | A:0.7311<br>A:0.092<br>T:0.1718<br>C:0.0654<br>T:0.0399<br>T:0.5675<br>T:0.2495<br>T:0.0051<br>T:0.044<br>T:0.044<br>A:0.3231<br>A:0.4898<br>C:0.5225 | A:0.5111<br>T:0.0842<br>T:0.1266<br>T:0.2719<br>T:0.0404<br>A:0.5722<br>C:0.2819 |
| C:0.0357<br>C:0.9534<br>A:0<br>T:0.4524<br>A:0<br>A:0.1756<br>T:0.1766<br>C:0.3532                                                        | C:0.2783<br>C:0.7117<br>A:0.0567<br>T:0.4185<br>A:0.0388<br>A:0.0517<br>T:0.0557<br>C:0.4632                                                         | C:0.1912<br>C:0.8845<br>A:0.0082<br>T:0.5389<br>A:0.0082<br>A:0.0481<br>T:0.047<br>C:0.3681                                                           | C:0.8359<br>A:0.0123<br>T:0.7402<br>A:0.0129<br>A:0.0613<br>T:0.0629<br>C:0.3561 |
| C:0.7123<br>C:0.7927<br>T:0.0625<br>G:0.0288<br>T:0<br>C:0.0337<br>A:0.2599<br>T:0.5446<br>T:0.1161<br>T:0.0526                           | C:0.3966<br>C:0.4394<br>T:0.1133<br>G:0.172<br>T:0.002<br>C:0.0099<br>A:0.4254<br>T:0.5895<br>T:0.161<br>T:0.1143                                    | C:0.5552<br>C:0.6135<br>T:0.0777<br>G:0.0706<br>T:0<br>C:0.0276<br>A:0.4489<br>T:0.6748<br>T:0.2096<br>T:0.1319                                       | C:0.514<br>T:0.0481<br>T:0.0002<br>C:0.0524<br>A:0.2421<br>T:0.7896              |

VEP annotated somatic variants

|                    |                  |                    |          |
|--------------------|------------------|--------------------|----------|
| A:0.7123           | A:0.3956         | A:0.3804           | A:0.1922 |
| A:0.0367           | A:0.1163         | A:0.0654           | A:0.0288 |
| T:0.2976           | T:0.4632         | T:0.546            | T:0.3411 |
| T:0.1558           | T:0.2952         | T:0.1687           | T:0.1407 |
| A:0.7837           | A:0.7087         | A:0.6912           | A:0.4754 |
| T:0.5248           | T:0.6571         | T:0.5838           | T:0.1652 |
| A:0.2728           | A:0.2356         | A:0.182            | A:0.2499 |
| A:0.001            | A:0.0676         | A:0.1002           |          |
| T:0.0119           | T:0.0328         | T:0.0327           | T:0.0773 |
| C:0.1508           | C:0.1083         | C:0.0665           | C:0.1545 |
| A:0.1429           | A:0.1093         | A:0.0215           | A:0.0164 |
| A:0.3492           | A:0.2734         | A:0.2423           | A:0.2093 |
| C:0.3958           | C:0.4294         | C:0.3569           | C:0.0975 |
| T:0.1438           | T:0.2873         | T:0.2393           | T:0.3155 |
| G:0.4345           | G:0.3111         | G:0.456            |          |
| C:0                | C:0.0308         | C:0.0307           |          |
| G:0.1865           | G:0.4334         | G:0.3364           |          |
| C:0.5933           | C:0.7853         | C:0.682            | C:0.4626 |
| G:0.5754           | G:0.333          | G:0.5215           | G:0.1879 |
| G:0.3909           | G:0.1928         | G:0.1534           |          |
| A:0.3968           | A:0.1918         | A:0.2127           | A:0.1012 |
| A:0.3373           | A:0.1968         | A:0.2106           |          |
| T:0.0179           | T:0.2823         | T:0.1462           |          |
| C:0.5              | C:0.3489         | C:0.2556           | C:0.5364 |
| G:0.002            | G:0.2525         | G:0.0685           | G:0.4368 |
| A:0.2083           | A:0.1938         | A:0.4233           |          |
| A:0.1319           | A:0.1292         | A:0.3446           | A:0.3654 |
| G:0.2093           | G:0.1412         | G:0.4223           | G:0.6142 |
| C:0                | C:0.0706         | C:0.0061           | C:0.122  |
| -:0                | -:0.0785         | -:0.0184           |          |
|                    |                  |                    | G:0.1121 |
| -:0.9236, -:0.9236 | -:0.327, -:0.327 | -:0.5297, -:0.5297 |          |
| T:0                | T:0.007          | T:0.002            | T:0.0009 |
| T:0.001            | T:0.1382         | T:0.1104           |          |
| T:0                | T:0.0219         | T:0.0358           | T:0.0137 |
| C:0                | C:0.0189         | C:0.002            |          |
| A:0.0486           | A:0.2127         | A:0.1309           | A:0.0942 |
| G:0.3006           | G:0.3549         | G:0.2331           |          |
| T:0.2798           | T:0.2853         | T:0.2618           | T:0.1941 |
| G:0.2589           | G:0.2883         | G:0.2546           | G:0.2077 |
| A:0                | A:0.0557         | A:0.0061           | A:0.0115 |
| G:0.498            | G:0.2475         | G:0.3436           |          |
| A:0.3948           | A:0.2893         | A:0.3006           | A:0.1811 |
| A:0.0933           | A:0.0557         | A:0.0654           |          |
| C:0                | C:0.0149         | C:0.002            | C:0.0027 |

VEP annotated somatic variants

|          |          |          |          |
|----------|----------|----------|----------|
| G:0.4415 | G:0.6581 | G:0.4816 |          |
| C:0.4454 | C:0.6581 | C:0.4877 | C:0.6863 |
| C:0.2361 | C:0.1252 | C:0.2188 | C:0.0273 |
| A:0.2212 | A:0.2316 | A:0.1769 | A:0.3774 |
| C:0.3175 | C:0.3032 | C:0.136  |          |
| T:0.3175 | T:0.2584 | T:0.1237 | T:0.2152 |
| C:0.37   | C:0.4046 | C:0.455  |          |
| G:0.7579 | G:0.666  | G:0.727  | G:0.9207 |
| C:0      | C:0.005  | C:0.002  | C:0.0007 |
| T:0.1944 | T:0.5089 | T:0.2065 |          |
| A:0      | A:0.0119 | A:0.0031 | A:0.0023 |
| A:0      | A:0.1402 | A:0.0174 | A:0.0322 |
| A:0.6141 | A:0.5149 | A:0.4458 | A:0.7102 |
| C:0.4782 | C:0.2803 | C:0.3037 |          |
| T:0.0933 | T:0.1839 | T:0.2372 |          |
| G:0.9375 | G:0.7048 | G:0.682  | G:0.7255 |
| A:0.0694 | A:0.1103 | A:0.1207 | A:0.0256 |
| G:0.3075 | G:0.2555 | G:0.1616 | G:0.13   |
| T:0.3056 | T:0.2515 | T:0.1595 | T:0.0858 |
| -:0.254  | -:0.3996 | -:0.319  | -:0.2863 |
| T:0.003  | T:0.1869 | T:0.0685 | T:0.1423 |
| G:0.1429 | G:0.3748 | G:0.2362 |          |
| A:0.1121 | A:0.341  | A:0.4325 | A:0.1879 |
| A:0.1429 | A:0.4195 | A:0.4008 | A:0.3323 |
| T:0.8224 | T:0.3579 | T:0.3845 | T:0.5733 |
| C:0.3323 | C:0.328  | C:0.32   | C:0.4607 |
| T:0.1716 | T:0.168  | T:0.2485 | T:0.3963 |
| T:0.0179 | T:0.2803 | T:0.1881 |          |
| C:0      | C:0.0845 | C:0.0266 | C:0.015  |
| A:0.0387 | A:0.2058 | A:0.092  |          |
| A:0.0198 | A:0.0318 | A:0.135  | A:0.0563 |
| T:0      | T:0.005  | T:0      | T:0      |
| A:0.3095 | A:0.0775 | A:0.1554 | A:0.0485 |
| G:0.245  | G:0.4135 | G:0.3446 | G:0.4272 |
| G:0.245  | G:0.335  | G:0.3487 | G:0.3861 |
|          |          |          | T:0.3826 |
| A:0.1815 | A:0.008  | A:0.0092 | A:0.03   |
| A:0.3601 | A:0.2913 | A:0.4632 |          |
| G:0.371  | G:0.0895 | G:0.1104 | G:0.4893 |
|          |          |          | A:0      |
| A:0      | A:0.0368 | A:0.0297 | A:0.0055 |
| A:0.7232 | A:0.1451 | A:0.3262 | A:0.0837 |
| T:0.3423 | T:0.2714 | T:0.3129 |          |
| T:0.0347 | T:0.1074 | T:0.1483 | T:0.1135 |
| C:0.4692 | C:0.3718 | C:0.41   | C:0.2655 |

VEP annotated somatic variants

|          |          |          |          |
|----------|----------|----------|----------|
| G:0.1458 | G:0.1879 | G:0.1401 | G:0.0447 |
| C:0      | C:0.0139 | C:0.001  | C:0.0007 |
| A:0.6181 | A:0.5348 | A:0.6319 | A:0.629  |
| G:0.8542 | G:0.7336 | G:0.817  | G:0.8447 |
| T:0.6746 | T:0.6024 | T:0.4162 | T:0.1785 |
| T:0.0456 | T:0.1958 | T:0.1329 |          |
| A:0.002  | A:0      | A:0      |          |
| C:0.4157 | C:0.2515 | C:0.2587 | C:0.3509 |
| A:0.2966 | A:0.173  | A:0.2198 |          |
| C:0.7103 | C:0.7763 | C:0.7832 | C:0.8515 |
| C:0.6627 | C:0.6998 | C:0.7781 | C:0.8096 |
| G:0.6458 | G:0.7624 | G:0.7965 | G:0.895  |
| T:0      | T:0.0229 | T:0.046  | T:0.0045 |
| -:0.0516 | -:0.0706 | -:0.1186 |          |
| G:0.1329 | G:0.2694 | G:0.2229 |          |
| A:0.5099 | A:0.5129 | A:0.5429 |          |
| T:0.9861 | T:0.7396 | T:0.8773 | T:0.9446 |
| A:0.628  | A:0.5636 | A:0.6033 | A:0.3747 |
| C:0.628  | C:0.5596 | C:0.6033 |          |
| A:0.5188 | A:0.4573 | A:0.4039 |          |
| A:0.4315 | A:0.3052 | A:0.3088 | A:0.1053 |
| G:0.8244 | G:0.3579 | G:0.3773 | G:0.5411 |
| A:0.1577 | A:0.3012 | A:0.4346 |          |
| A:0.13   | A:0.3032 | A:0.3057 |          |
| A:0.2976 | A:0.7256 | A:0.6258 | A:0.5402 |
| T:0.255  | T:0.2505 | T:0.2474 | T:0.4514 |
| A:0      | A:0      | A:0      |          |
| T:0.3363 | T:0.1292 | T:0.2699 |          |
| A:0.2788 | A:0.2485 | A:0.2853 | A:0.4832 |
| C:0.5923 | C:0.327  | C:0.3609 | C:0.3161 |
| G:0      | G:0.004  | G:0      |          |
| C:0.3621 | C:0.2813 | C:0.4223 | C:0.111  |
| G:0.001  | G:0.2893 | G:0.1513 |          |
| C:0.9107 | C:0.6779 | C:0.6871 |          |
| A:0.5069 | A:0.5934 | A:0.4468 | A:0.4069 |
| T:0.0575 | T:0.0706 | T:0.0297 | T:0.0499 |
| A:0      | A:0.001  | A:0      | A:0      |
| A:0      | A:0.0398 | A:0.0123 |          |
| A:0.4097 | A:0.2843 | A:0.5102 | A:0.3293 |
| T:0.1448 | T:0.5288 | T:0.4785 |          |
| A:0.7202 | A:0.339  | A:0.456  | A:0.1133 |
| G:0      | G:0.0189 | G:0.002  | G:0.0049 |
| G:0.0734 | G:0.0507 | G:0.0941 | G:0.0767 |
| A:0      | A:0.0219 | A:0.0123 | A:0.0064 |
| G:0.1101 | G:0.335  | G:0.1472 | G:0.0672 |

VEP annotated somatic variants

|                 |          |          |          |
|-----------------|----------|----------|----------|
| T:0.3155        | T:0.3181 | T:0.3252 | T:0.1649 |
| A:0.121         | A:0.3101 | A:0.3037 |          |
| C:0.0923        | C:0.006  | C:0.002  |          |
| T:0.5248        | T:0.4712 | T:0.4387 |          |
| G:0             | G:0.006  | G:0.0092 |          |
| G:0.6647        | G:0.833  | G:0.7914 |          |
| T:0.0903        | T:0.4891 | T:0.3487 | T:0.1382 |
| C:0.0069        | C:0.0308 | C:0.0951 | C:0.0073 |
| C:0.8671        | C:0.7207 | C:0.6984 | C:0.8495 |
| C:0.1131        | C:0.0865 | C:0.1534 |          |
| C:0.4891        | C:0.329  | C:0.4213 | C:0.2668 |
|                 |          |          |          |
| C:0.0903        | C:0.1352 | C:0.1452 | C:0.4694 |
| T:0.6657        | T:0.5477 | T:0.498  | T:0.599  |
|                 |          |          |          |
| T:0.0397        | T:0.1292 | T:0.0961 |          |
| G:0.2034        | G:0.4771 | G:0.3006 | G:0.1114 |
| A:0.2609        | A:0.3489 | A:0.1074 | A:0.559  |
| C:0.6141        | C:0.4543 | C:0.5399 | C:0.2306 |
|                 |          |          |          |
| T:0.6766        | T:0.6948 | T:0.6094 | T:0.241  |
| T:0             | T:0.0209 | T:0.0041 |          |
| C:0             | C:0.0089 | C:0.001  | C:0.0035 |
| G:0             | G:0.0288 | G:0.0143 |          |
| -:0.001         | -:0.0169 | -:0.0031 |          |
| C:0.621         | C:0.2893 | C:0.4857 |          |
| C:0.621         | C:0.2893 | C:0.4847 | C:0.4351 |
| G:0.3452        | G:0.3032 | G:0.1677 | G:0.2136 |
| T:0.755         | T:0.2634 | T:0.4683 | T:0.1936 |
| G:0.1042        | G:0.0358 | G:0.0562 | G:0.1221 |
| A:0.3274        | A:0.4056 | A:0.3712 | A:0.32   |
| T:0.1627        | T:0.1988 | T:0.1564 | T:0.0687 |
|                 |          |          |          |
| A:0.002,A:0.002 | A:0,A:0  | A:0,A:0  | A:0,A:0  |
|                 |          |          |          |
| C:0.7024        | C:0.6064 | C:0.5358 | C:0.8318 |
| C:0.4792        | C:0.3748 | C:0.3231 |          |
| C:0             | C:0      | C:0.0031 | C:0      |
|                 |          |          |          |
| C:0             | C:0      | C:0      | C:0      |
| G:0.2589        | G:0.4433 | G:0.4335 | G:0.7572 |
| T:0.0863        | T:0.2575 | T:0.3456 |          |
| T:0.0833        | T:0.0616 | T:0.0726 | T:0.0125 |
| T:0             | T:0.2376 | T:0.1656 | T:0.1642 |
| A:0             | A:0.1054 | A:0.091  | A:0.0194 |
| A:0.371         | A:0.2674 | A:0.2444 | A:0.2553 |
| A:0.5873        | A:0.3489 | A:0.4509 |          |
| T:0.3631        | T:0.1909 | T:0.2515 | T:0.1248 |
| T:0.1062        | T:0.1382 | T:0.1493 | T:0.1498 |
| A:0.5119        | A:0.3648 | A:0.3395 | A:0.6632 |
| A:0.2738        | A:0.2197 | A:0.1401 |          |
| G:0.5099        | G:0.3628 | G:0.3395 | G:0.6454 |
| T:0.001         | T:0.0129 | T:0.0215 |          |



VEP annotated somatic variants

|               |               |               |               |
|---------------|---------------|---------------|---------------|
| C:0.0476      | C:0.0954      | C:0.0256      | C:0.0325      |
| C:0.1855      | C:0.2594      | C:0.1922      | C:0.4332      |
| T:0.5248      | T:0.3559      | T:0.4673      | T:0.7642      |
| G:0.3433      | G:0.175       | G:0.3129      |               |
| T:0.0278      | T:0.2604      | T:0.2904      | T:0.4471      |
| A:0.1667      | A:0.3708      | A:0.3078      | A:0.2063      |
| G:0           | G:0.0577      | G:0.0245      |               |
| G:0           | G:0.006       | G:0.001       | G:0.0007      |
| T:0.1597      | T:0.1362      | T:0.1779      |               |
| A:0.7063      | A:0.3161      | A:0.5481      | A:0.8133      |
| T:0.62        | T:0.3857      | T:0.5521      |               |
| A:0.6806      | A:0.7117      | A:0.8303      | A:0.8923      |
| T:0.501       | T:0.4642      | T:0.6012      |               |
| G:0.4157      | G:0.328       | G:0.5665      | G:0.4019      |
| G:0.998       | G:0.8032      | G:0.9448      | G:0.9053      |
| C:0.372       | C:0.2863      | C:0.5706      | C:0.263       |
| G:0.6419      | G:0.3797      | G:0.3783      | G:0.094       |
| A:0           | A:0.0099      | A:0.0031      | A:0.0039      |
| T:0.1101      | T:0.0626      | T:0.0123      | T:0.0105      |
| T:0.0308      | T:0.2913      | T:0.1534      | T:0.1907      |
| T:0.3462      | T:0.2485      | T:0.4356      |               |
| T:0.0565      | T:0.2356      | T:0.1299      | T:0.4256      |
| G:0.4276      | G:0.3857      | G:0.3098      | G:0.1984      |
| T:0.7778      | T:0.5835      | T:0.7331      | T:0.8727      |
| G:0.4266      | G:0.3917      | G:0.2986      | G:0.2177      |
| A:0.5218      | A:0.5567      | A:0.6176      | A:0.4641      |
| GGGAGA:0.4067 | GGGAGA:0.2545 | GGGAGA:0.4959 | GGGAGA:0.2907 |
| C:0.0228      | C:0.3111      | C:0.2393      | C:0.2588      |
| C:0.2262      | C:0.164       | C:0.0869      |               |
| A:0.1706      | A:0.163       | A:0.0798      |               |
| C:0.9931      | C:0.5219      | C:0.6503      | C:0.6186      |
| A:0.7639      | A:0.6233      | A:0.4315      |               |
| G:0.5575      | G:0.4781      | G:0.4714      | G:0.4909      |
| A:0.3135      | A:0.5905      | A:0.4806      | A:0.3805      |
| -:0.6607      | -:0.7058      | -:0.7689      | -:0.4065      |
| T:0.2728      | T:0.2883      | T:0.2219      | T:0.0988      |
| C:0           | C:0.2992      | C:0.0706      | C:0.0649      |
| T:0.001       | T:0.1402      | T:0.0286      | T:0.1441      |
| C:0.0952      | C:0.3429      | C:0.2096      | C:0.6714      |
| A:0.0685      | A:0.7594      | A:0.4202      | A:0.1745      |
| C:0.6667      | C:0.3907      | C:0.498       |               |
| T:0.1587      | T:0.0835      | T:0.0767      |               |
| C:0.6359      | C:0.2724      | C:0.3507      |               |
| C:0.003       | C:0.0905      | C:0.0235      |               |
| G:0.5308      | G:0.5427      | G:0.4141      | G:0.5463      |
| T:0           | T:0.003       | T:0.0061      | T:0.0016      |
| C:0.5675      | C:0.3499      | C:0.1677      |               |

VEP annotated somatic variants

|          |          |          |          |
|----------|----------|----------|----------|
| T:0.0883 | T:0.1243 | T:0.183  | T:0.3044 |
| T:0.001  | T:0.0408 | T:0.0286 | T:0.01   |
| G:0.2897 | G:0.5417 | G:0.4622 | G:0.4703 |
| T:0.8601 | T:0.4334 | T:0.6278 | T:0.7301 |
| G:0.373  | G:0.3638 | G:0.5    | G:0.2478 |
| T:0.371  | T:0.3588 | T:0.501  | T:0.1856 |
| C:0.371  | C:0.3579 | C:0.501  | C:0.1876 |
| A:0.371  | A:0.3598 | A:0.501  | A:0.2293 |
| T:0.0556 | T:0.0676 | T:0.0736 | T:0.0138 |
| T:0      | T:0.0109 | T:0      | T:0.002  |
| A:0      | A:0.0139 | A:0.0031 | A:0.005  |
| A:0.2639 | A:0.3936 | A:0.3548 | A:0.2519 |
| A:0.1518 | A:0.5328 | A:0.3538 |          |
| T:0.3562 | T:0.1392 | T:0.09   | T:0.0506 |
| C:0.378  | C:0.8002 | C:0.6258 | C:0.2276 |
| C:0.5149 | C:0.8877 | C:0.7014 |          |
| T:0.5952 | T:0.1938 | T:0.3712 | T:0.0392 |
| C:0.6746 | C:0.3807 | C:0.3016 | C:0.4934 |
| G:0.252  | G:0.2873 | G:0.272  | G:0.2794 |
| C:0      | C:0.002  | C:0.0133 | C:0.0011 |
| T:0      | T:0.0199 | T:0.001  | T:0.002  |
| G:0.4484 | G:0.661  | G:0.501  | G:0.3978 |
| G:0.0218 | G:0.0905 | G:0.089  | G:0.1622 |
| G:0.378  | G:0.333  | G:0.4366 | G:0.1315 |
| G:0.7232 | G:0.4712 | G:0.4325 | G:0.4165 |
| T:0.4177 | T:0.7535 | T:0.7689 | T:0.8613 |
| A:0      | A:0.0109 | A:0.001  |          |
| G:0      | G:0.0169 | G:0.002  | G:0.0015 |
|          |          |          | G:0.0008 |
| C:0      | C:0.0099 | C:0.0041 |          |
| T:0.4792 | T:0.1252 | T:0.3303 | T:0.0429 |
| A:0      | A:0.0328 | A:0.002  | A:0.0561 |
| A:0.001  | A:0.0268 | A:0.0235 | A:0.0254 |
| G:0.3244 | G:0.2724 | G:0.3804 | G:0.4003 |
| A:0.254  | A:0.2694 | A:0.2362 |          |
| A:0.0139 | A:0.1103 | A:0.1452 | A:0.0254 |
| G:0      | G:0.0258 | G:0.0031 | G:0.0077 |
| T:0.5437 | T:0.3956 | T:0.227  |          |
| G:0.87   | G:0.6561 | G:0.8323 |          |
| G:0.0089 | G:0.1004 | G:0.2413 | G:0.0704 |
| T:0      | T:0.0596 | T:0.0164 |          |
| G:0.005  | G:0.1789 | G:0.1247 | G:0.1682 |
| G:0.1052 | G:0.0656 | G:0.092  | G:0.2312 |
| G:0.3512 | G:0.2177 | G:0.4254 | G:0.2676 |

VEP annotated somatic variants

|             |            |           |           |
|-------------|------------|-----------|-----------|
| G:0.0506    | G:0.2525   | G:0.226   |           |
| T:0         | T:0.006    | T:0       |           |
| C:0.0179    | C:0.0537   | C:0.0746  | C:0.2394  |
| A:0.6726    | A:0.673    | A:0.635   |           |
| T:0         | T:0.0398   | T:0.0041  | T:0.0077  |
| C:0.1567    | C:0.2008   | C:0.1708  |           |
| A:0.005     | A:0.165    | A:0.1115  | A:0.0449  |
| A:0.0069    | A:0.0417   | A:0.1299  |           |
| T:0.1448    | T:0.0358   | T:0.1196  | T:0.0674  |
| A:0.2272    | A:0.2306   | A:0.2229  | A:0.0454  |
| G:0.8234    | G:0.3579   | G:0.3793  | G:0.4986  |
| -:0.3512    | -:0.1312   | -:0.1288  |           |
| T:0.3512    | T:0.1312   | T:0.1288  | T:0.0697  |
| T:0.8244    | T:0.4404   | T:0.6871  |           |
| A:0.8244    | A:0.4404   | A:0.6871  | A:0.4187  |
| C:0.6468    | C:0.5159   | C:0.5123  | C:0.9413  |
| C:0.0427    | C:0.1342   | C:0.0368  |           |
| T:0.0427    | T:0.1352   | T:0.0368  |           |
| C:0.0427    | C:0.1352   | C:0.0368  |           |
| C:0.4375    | C:0.165    | C:0.2669  | C:0.3301  |
| G:0.2778    | G:0.3201   | G:0.4018  |           |
| A:0         | A:0.0149   | A:0.0501  | A:0.0043  |
| A:0.3581    | A:0.2117   | A:0.4519  | A:0.2113  |
| T:0.8532    | T:0.6491   | T:0.6718  |           |
| G:0.2927    | G:0.5427   | G:0.5685  |           |
| A:0.001     | A:0.0596   | A:0.0389  | T:0.308   |
| T:0.001     | T:0.0606   | T:0.0327  | A:0.0566  |
| T:0.001     | T:0.0596   | T:0.0389  | T:0.0095  |
| A:0.1458    | A:0.2565   | A:0.2229  | T:0.0091  |
| G:0.2004    | G:0.332    | G:0.2863  | A:0.1433  |
| C:0.496     | C:0.7942   | C:0.7311  | G:0.4309  |
| A:0         | A:0.0427   | A:0.0041  | C:0.818   |
| A:0.0913    | A:0.1849   | A:0.1145  | A:0.007   |
| G:0.001     | G:0.0944   | G:0.0562  | A:0.2494  |
| T:0.2123    | T:0.0885   | T:0.093   |           |
| G:0.0962    | G:0.172    | G:0.2106  | G:0.2989  |
| G:0.1052    | G:0.1978   | G:0.2474  | G:0.6416  |
| G:0.001     | G:0.0706   | G:0.0368  | G:0.1068  |
| AGC:0.1458  | AGC:0.2396 | AGC:0.317 | AGC:0.201 |
| G:0.4127    | G:0.1093   | G:0.2648  | G:0.6407  |
| A:0.0903    | A:0.168    | A:0.0613  | A:0.0354  |
| n:TIGR01628 |            |           |           |
| T:0.001     | T:0.0696   | T:0.0082  | T:0.0141  |
| A:0.3115    | A:0.2416   | A:0.2853  | A:0.1732  |
| A:0         | A:0.0129   | A:0       | A:0.1419  |
| A:0.0198    | A:0.0736   | A:0.0665  |           |
| G:0.2986    | G:0.2604   | G:0.4693  | G:0.3757  |
| A:0.3046    | A:0.3867   | A:0.2137  | A:0.0717  |

VEP annotated somatic variants

|          |          |          |          |
|----------|----------|----------|----------|
| A:0.1756 | A:0.1471 | A:0.1677 | A:0.0649 |
| T:0.1518 | T:0.1133 | T:0.1656 | T:0.1419 |
| G:0      | G:0.0179 | G:0.001  | G:0.0039 |
| G:0      | G:0.0924 | G:0.0317 |          |
| G:0.3581 | G:0.0616 | G:0.0532 | G:0.1516 |
| G:0.0585 | G:0.2316 | G:0.0982 | G:0.2088 |
| A:0.0159 | A:0.2187 | A:0.1278 |          |
| A:0.8343 | A:0.3678 | A:0.4847 | A:0.796  |
|          |          |          | A:0.0025 |
| T:0.4306 | T:0.4722 | T:0.5429 | T:0.1827 |
| G:0      | G:0.0487 | G:0.0072 |          |
| A:0.2798 | A:0.2942 | A:0.3579 | A:0.2698 |
|          |          |          | A:0.2401 |
| C:0.1071 | C:0.3956 | C:0.3067 | C:0.3327 |
| C:0.1071 | C:0.3966 | C:0.3067 | C:0.3597 |
| C:0.3988 | C:0.6203 | C:0.3374 |          |
| G:0.4425 | G:0.335  | G:0.454  | G:0.3401 |
| G:0.37   | G:0.3062 | G:0.4376 | G:0.2069 |
| -:0.0278 | -:0.5437 | -:0.1902 |          |
| G:0.2153 | G:0.2873 | G:0.2198 | G:0.1094 |
| G:0.7966 | G:0.2038 | G:0.5982 |          |
| A:0.3442 | A:0.1113 | A:0.2229 | A:0.1448 |
| C:0.3145 | C:0.1243 | C:0.226  | C:0.2524 |
| A:0.1915 | A:0.2565 | A:0.1431 | A:0.3969 |
| G:0.1925 | G:0.2545 | G:0.1431 | G:0.387  |
| G:0.4018 | G:0.5646 | G:0.3742 |          |
| T:0.3343 | T:0.3668 | T:0.2699 |          |
| C:0      | C:0.1272 | C:0.0665 |          |
| T:0.2966 | T:0.2227 | T:0.2311 | T:0.154  |
| G:0.1885 | G:0.4672 | G:0.272  | G:0.3622 |
| T:0.373  | T:0.3767 | T:0.138  | T:0.3118 |
| A:0.0198 | A:0.2147 | A:0.0869 | A:0.254  |
| G:0.3224 | G:0.2863 | G:0.3967 | G:0.271  |
| C:0.3938 | C:0.1809 | C:0.2229 |          |
| G:0.0069 | G:0.2694 | G:0.0982 | G:0.057  |
| G:0.1617 | G:0.0845 | G:0.0818 | G:0.0104 |
| G:0.002  | G:0.3052 | G:0.1401 | G:0.3389 |
| A:0.3383 | A:0.2922 | A:0.5542 | A:0.3395 |
| G:0.5466 | G:0.4135 | G:0.4489 | G:0.4319 |
| A:0.0774 | A:0.1173 | A:0.0992 | A:0.1056 |
| C:0.2579 | C:0.495  | C:0.4571 | C:0.2077 |
| T:0.8373 | T:0.3201 | T:0.5562 |          |
| C:0.0079 | C:0.0666 | C:0.0409 |          |
| T:0.1885 | T:0.1143 | T:0.1452 | T:0.0311 |
| A:0.2004 | A:0.0984 | A:0.044  | A:0.043  |
| G:0.5357 | G:0.4573 | G:0.4182 | G:0.5466 |

VEP annotated somatic variants

|                   |                   |                   |          |
|-------------------|-------------------|-------------------|----------|
| T:0.2123          | T:0.2753          | T:0.1943          | T:0.2088 |
| T:0.2381          | T:0.3091          | T:0.2474          | T:0.3935 |
| C:0.0645          | C:0.3419          | C:0.362           |          |
| G:0.7897          | G:0.6292          | G:0.6922          | G:0.7272 |
| C:0.9871          | C:0.7594          | C:0.82            |          |
| C:0.1429          | C:0.4344          | C:0.3476          | C:0.8228 |
| G:0.1458          | G:0.4066          | G:0.3344          | G:0.1049 |
| A:0.1518          | A:0.4314          | A:0.3517          |          |
| A:0.1419          | A:0.4284          | A:0.3446          | A:0.088  |
| G:0.1508          | G:0.4404          | G:0.3548          | G:0.8202 |
| G:0.1448          | G:0.4364          | G:0.363           | G:0.7332 |
|                   |                   |                   |          |
| T:0.246           | T:0.2813          | T:0.272           | T:0.118  |
| C:0.4563          | C:0.5119          | C:0.544           | C:0.5625 |
| G:0.4077          | G:0.3996          | G:0.4274          |          |
| A:0.0823          | A:0.162           | A:0.2648          |          |
|                   |                   |                   |          |
| A:0.4107          | A:0.5199          | A:0.6063          |          |
| T:0.2887          | T:0.2853          | T:0.1207          | T:0.2922 |
|                   |                   |                   |          |
| T:0.1032          | T:0.2565          | T:0.2914          | T:0.318  |
| C:0.4325          | C:0.3509          | C:0.4969          | C:0.3193 |
| A:0.0129          | A:0.2386          | A:0.1892          | A:0.2716 |
| :-0.1895,-:0.1895 | :-0.2227,-:0.2227 | :-0.362,-:0.362   |          |
|                   |                   |                   |          |
| G:0.1627          | G:0.1103          | G:0.0317          | G:0.1712 |
| A:0.1349          | A:0.4751          | A:0.3405          |          |
| C:0.0585          | C:0.1958          | C:0.1022          |          |
| G:0.0258          | G:0.1203          | G:0.1196          |          |
| T:0.2113          | T:0.1213          | T:0.1595          |          |
| C:0.3849          | C:0.6282          | C:0.5736          | C:0.5152 |
| GAACCC:0.3323     | GAACCC:0.4036     | GAACCC:0.4213     |          |
| G:0.4474          | G:0.4006          | G:0.3569          | G:0.2721 |
| A:0.0863          | A:0.17            | A:0.0634          |          |
| C:0.4524          | C:0.2644          | C:0.2986          | C:0.2738 |
| TGTTTTGTTT:0.0268 | TGTTTTGTTT:0.2416 | TGTTTTGTTT:0.2505 |          |
| T:0.5724          | T:0.4225          | T:0.5675          | T:0.5392 |
| A:0.4881          | A:0.3867          | A:0.3579          | A:0.3604 |
| A:0.627           | A:0.2724          | A:0.3926          |          |
| C:0.5764          | C:0.4463          | C:0.4121          | C:0.6384 |
| T:0.5744          | T:0.4463          | T:0.409           | T:0.3737 |
| C:0.5744          | C:0.4463          | C:0.409           | C:0.3786 |
| G:0.2103          | G:0.2704          | G:0.3865          | G:0.446  |
| G:0.4722          | G:0.4026          | G:0.4836          | G:0.5633 |
| G:0.2341          | G:0.4573          | G:0.2556          | G:0.2878 |
|                   |                   |                   |          |
| A:0.2202          | A:0.2873          | A:0.2546          | A:0.3214 |
|                   |                   |                   |          |
| A:0               | A:0.0527          | A:0.0072          |          |
|                   |                   |                   |          |
| A:0               | A:0.0258          | A:0.0112          | A:0.0063 |
| T:0.4375          | T:0.2684          | T:0.2679          |          |
| A:0.251           | A:0.2624          | A:0.1104          |          |

VEP annotated somatic variants

|            |                 |                 |                 |
|------------|-----------------|-----------------|-----------------|
| -:0        | -:0.005         | -:0.001         |                 |
| A:0.004    | A:0.1103        | A:0.1431        | A:0.072         |
| A:0.003    | A:0.1431        | A:0.1268        |                 |
|            |                 |                 | C:0.0094        |
| G:0.1042   | G:0.2256        | G:0.2004        | G:0.2767        |
| C:0.4554   | C:0.3986        | C:0.3712        |                 |
| G:0.3036   | G:0.4334        | G:0.2096        | G:0.3367        |
| A:0.1815   | A:0.333         | A:0.3252        |                 |
| G:0.1538   | G:0.1074        | G:0.0307        | G:0.1963        |
|            |                 |                 |                 |
| C:0.7302   | C:0.5706        | C:0.591         | C:0.5506        |
| G:0.0317   | G:0.3111        | G:0.1585        |                 |
| A:0.006    | A:0.334         | A:0.1299        | A:0.0681        |
| A:0.4583   | A:0.1451        | A:0.1861        |                 |
| G:0.0496   | G:0.005         | G:0.0041        |                 |
| A:0.0496   | A:0.005         | A:0.0041        |                 |
| C:0.0496   | C:0.005         | C:0.0041        | C:0.002         |
| GC:0.0496  | GC:0.005        | GC:0.0041       | GC:0            |
|            |                 |                 |                 |
| C:0.5476   | C:0.4483        | C:0.456         | C:0.4671        |
| G:0.5615   | G:0.2833        | G:0.592         | G:0.5498        |
| G:0.1667   | G:0.1561        | G:0.2924        | G:0.5082        |
| A:0.1667   | A:0.2674        | A:0.1973        | A:0.1899        |
| G:0.7579   | G:0.6998        | G:0.7321        | G:0.9671        |
| A:0.4742   | A:0.3936        | A:0.3855        |                 |
| A:0.6151   | A:0.3628        | A:0.6247        | A:0.6578        |
| TTCCACG:0  | TTCCACG:0.0408  | TTCCACG:0.0184  |                 |
| G:0.0744   | G:0.3757        | G:0.2209        | G:0.3484        |
| G:0.0526   | G:0.2117        | G:0.3354        | G:0.5512        |
| A:0.0575   | A:0.3767        | A:0.2127        | A:0.5931        |
|            |                 |                 |                 |
| A:0.9484   | A:0.7455        | A:0.7393        | A:0.7486        |
| C:0.2728   | C:0.3042        | C:0.2802        | C:0.1092        |
| -:0.6577   | -:0.7048        | -:0.8384        | -:0.3888        |
| T:0        | T:0.002         | T:0             | T:0             |
|            |                 |                 | C:0             |
|            |                 |                 | A:0.5572        |
| A:0.2698   | A:0.506         | A:0.5481        |                 |
| T:0.2262   | T:0.2883        | T:0.4325        |                 |
| C:0.0794   | C:0.2704        | C:0.1431        |                 |
| G:0.3075   | G:0.3907        | G:0.3507        | G:0.1019        |
| -:0.2659   | -:0.4443        | -:0.3456        | -:0.0747        |
| G:0.2569   | G:0.159         | G:0.1074        |                 |
| GGGGATTA:0 | GGGGATTA:0.1909 | GGGGATTA:0.0644 | GGGGATTA:0.0985 |
| G:0.0486   | G:0.1481        | G:0.1554        | G:0.0679        |
| C:0.746    | C:0.5964        | C:0.4785        | C:0.2549        |
| A:0.746    | A:0.5964        | A:0.4775        |                 |
| C:0.5942   | C:0.5517        | C:0.5746        | C:0.7483        |
| T:0.252    | T:0.328         | T:0.2761        | T:0.0717        |
| C:0.4683   | C:0.5557        | C:0.4233        | C:0.2724        |
| A:0.1587   | A:0.1402        | A:0.1084        |                 |
| T:0.5933   | T:0.4851        | T:0.4622        | T:0.3071        |
| AA:0.8968  | AA:0.6869       | AA:0.592        |                 |
| T:0.9792   | T:0.7992        | T:0.6043        |                 |
| T:0.0417   | T:0.0775        | T:0.0695        | T:0.1308        |

VEP annotated somatic variants

|                   |                   |                   |                   |
|-------------------|-------------------|-------------------|-------------------|
| T:0.371           | T:0.3588          | T:0.4969          |                   |
| -:0.2202          | -:0.3091          | -:0.5082          | -:0.2133          |
| A:0               | A:0.0189          | A:0               |                   |
| C:0.2262          | C:0.496           | C:0.4397          |                   |
| A:0.2282          | A:0.494           | A:0.4397          | A:0.1216          |
| T:0.3889          | T:0.5268          | T:0.4294          | T:0.2719          |
| A:0.0437          | A:0.169           | A:0.1186          |                   |
| G:0.5913          | G:0.4066          | G:0.5153          | G:0.63            |
| T:0               | T:0.0089          | T:0.0041          | T:0.001           |
| C:0.5625          | C:0.5258          | C:0.5061          |                   |
| A:0.8075          | A:0.5775          | A:0.5245          |                   |
| C:0.8294          | C:0.4284          | C:0.5706          |                   |
| A:0.8938          | A:0.3539          | A:0.4346          |                   |
| T:0.2708          | T:0.3917          | T:0.2924          | T:0.081           |
| A:0.2351          | A:0.3549          | A:0.2669          |                   |
| C:0.25            | C:0.2296          | C:0.227           | C:0.0993          |
| T:0.119           | T:0.493           | T:0.3579          | T:0.2217          |
| T:0.0089          | T:0.5636          | T:0.2188          | T:0.1627          |
| G:0.0764          | G:0.3072          | G:0.1759          |                   |
| T:0.1994          | T:0.326           | T:0.3067          |                   |
| T:0.1964          | T:0.3241          | T:0.3067          | T:0.1741          |
| A:0.8353          | A:0.6074          | A:0.7096          | A:0.466           |
| A:0.8353          | A:0.6252          | A:0.7127          | A:0.4687          |
| G:0.0804          | G:0.2594          | G:0.2546          | G:0.443           |
| C:0.0228          | C:0.1849          | C:0.1166          | C:0.2862          |
| C:0.9921          | C:0.8082          | C:0.726           | C:0.4798          |
| T:0.7421          | T:0.3519          | T:0.5164          | T:0.4149          |
|                   |                   |                   | C:0.0483          |
| C:0.125           | C:0.1113          | C:0.273           |                   |
| A:0.6677          | A:0.663           | A:0.4427          | A:0.2665          |
| T:0.4683,T:0.4683 | T:0.3419,T:0.3419 | T:0.5757,T:0.5757 | T:0.4385,T:0.4385 |
| A:0.3115,A:0.3115 | A:0.1034,A:0.1034 | A:0.2505,A:0.2505 | A:0.099,A:0.099   |
| T:0               | T:0.002           | T:0               | T:0.0154          |
| A:0.6458          | A:0.5716          | A:0.4346          | A:0.4582          |
| T:0.2659          | T:0.4771          | T:0.2955          | T:0.1337          |
| A:0.2738          | A:0.1014          | A:0.182           |                   |
| G:0.001           | G:0.0646          | G:0.045           |                   |
| C:0.1369          | C:0.3867          | C:0.3834          |                   |
| G:0.4673          | G:0.5577          | G:0.4642          | G:0.4855          |
| A:0.006           | A:0.5368          | A:0.2802          | A:0.2567          |
| T:0.6944          | T:0.2753          | T:0.3558          | T:0.5354          |
| T:0.001           | T:0.2863          | T:0.0573          |                   |
| G:0.244           | G:0.4066          | G:0.3466          | G:0.5282          |
| A:0.2758          | A:0.1889          | A:0.0726          |                   |
| A:0.3671          | A:0.3748          | A:0.3139          | A:0.6117          |
| C:0.7321          | C:0.9105          | C:0.9366          | C:0.8338          |
| T:0.8502          | T:0.7097          | T:0.7362          |                   |
| G:0.9593          | G:0.8738          | G:0.817           | G:0.8906          |

VEP annotated somatic variants

|          |          |          |          |
|----------|----------|----------|----------|
| T:0.9563 | T:0.8738 | T:0.8129 | T:0.9338 |
| T:0.0446 | T:0.1054 | T:0.1207 |          |
| C:0.1915 | C:0.2843 | C:0.364  |          |
| T:0      | T:0      | T:0      |          |
| A:0      | A:0.0089 | A:0.0031 |          |
| A:0.2252 | A:0.2485 | A:0.2311 |          |
| G:0.1597 | G:0.1113 | G:0.0307 | G:0.1205 |
| A:0.3214 | A:0.2783 | A:0.3916 | A:0.0608 |
| -:0.1319 | -:0.1909 | -:0.2147 |          |
| G:0.131  | G:0.1928 | G:0.2168 |          |
| G:0.1319 | G:0.1909 | G:0.2157 | G:0.1943 |
| T:0.1319 | T:0.1928 | T:0.2147 | T:0.2401 |
| T:0      | T:0.0249 | T:0.0051 |          |
| C:0      | C:0.0398 | C:0.0174 | C:0.1085 |
| G:0.0119 | G:0.0984 | G:0.0879 | G:0.0413 |
| A:0.0109 | A:0.1014 | A:0.0368 |          |
| C:0.7024 | C:0.5765 | C:0.4397 | C:0.3057 |
| G:0.6835 | G:0.5726 | G:0.4387 | G:0.3831 |
| G:0.1369 | G:0.1173 | G:0.1452 |          |
| A:0.0585 | A:0.2763 | A:0.2423 |          |
| C:0.1528 | C:0.2366 | C:0.2464 | C:0.2968 |
| C:0.2411 | C:0.503  | C:0.4714 |          |
|          |          |          |          |
| C:0.001  | C:0.1233 | C:0.0204 | C:0.0288 |
| A:0.5813 | A:0.4135 | A:0.7076 |          |
| A:0      | A:0.005  | A:0.001  | A:0.0007 |
| -:0.2986 | -:0.341  | -:0.3037 |          |
| C:0.7629 | C:0.4304 | C:0.6902 | C:0.51   |
| C:0.7629 | C:0.4781 | C:0.7065 | C:0.7471 |
| A:0.001  | A:0.0378 | A:0.0164 |          |
| A:0.2133 | A:0.2356 | A:0.1524 | A:0.6207 |
| C:0.1548 | C:0.1998 | C:0.1268 | C:0.0883 |
| T:0.12   | T:0.0964 | T:0.1309 |          |
| T:0.122  | T:0.0954 | T:0.135  | T:0.032  |
| T:0.5853 | T:0.5358 | T:0.6595 | T:0.2128 |
| T:0      | T:0      | T:0      |          |
| T:0.37   | T:0.6272 | T:0.6115 |          |
|          |          |          |          |
| C:0.0417 | C:0.3221 | C:0.3139 |          |
| C:0.005  | C:0.1879 | C:0.0982 |          |
| T:0      | T:0.1272 | T:0.0317 | T:0.03   |
|          |          |          |          |
| C:0.001  | C:0.1769 | C:0.0736 | C:0.1176 |
|          |          |          |          |
| G:0.1716 | G:0.2117 | G:0.1524 | G:0.0838 |
| C:0.7361 | C:0.333  | C:0.5245 | C:0.6243 |
| T:0.1071 | T:0.164  | T:0.2648 | T:0.0359 |
| A:0.1052 | A:0.164  | A:0.2761 | A:0.037  |
| C:0.6736 | C:0.4165 | C:0.6697 | C:0.3172 |
|          |          |          |          |
| C:0.9871 | C:0.7425 | C:0.8517 | C:0.8577 |
|          |          |          |          |
| T:0.0159 | T:0.0159 | T:0.1186 | T:0.0688 |



VEP annotated somatic variants

|          |          |          |          |
|----------|----------|----------|----------|
| T:0.0159 | T:0.0159 | T:0.1186 |          |
| T:0      | T:0.0249 | T:0.0061 |          |
| C:0.3095 | C:0.2376 | C:0.5041 |          |
| T:0.1567 | T:0.3877 | T:0.3681 |          |
| A:0.122  | A:0.4374 | A:0.5133 | A:0.1568 |
| A:0.4762 | A:0.7594 | A:0.909  | A:0.84   |
| A:0.5724 | A:0.329  | A:0.4274 |          |
| G:0.4643 | G:0.6233 | G:0.6421 |          |
| G:0.124  | G:0.1243 | G:0.1217 | G:0.0561 |
| A:0.4355 | A:0.2604 | A:0.2065 | A:0.3457 |
| A:0.0149 | A:0.1799 | A:0.2791 |          |
| G:0.0169 | G:0.2744 | G:0.093  | G:0.2122 |
| G:0.0347 | G:0.159  | G:0.1012 |          |
| T:0.3383 | T:0.1958 | T:0.3937 | T:0.3046 |
| T:0.881  | T:0.7873 | T:0.8415 |          |
| A:0.1548 | A:0.0845 | A:0.092  | A:0.214  |
| T:0.4772 | T:0.4871 | T:0.4744 | T:0.1811 |
| A:0.1438 | A:0.0606 | A:0.09   | A:0.1357 |
| G:0.6538 | G:0.3549 | G:0.5552 | G:0.9095 |
| T:0.5278 | T:0.3728 | T:0.4693 |          |
| A:0.375  | A:0.2634 | A:0.18   | A:0.0617 |
| A:0.0109 | A:0.1143 | A:0.0317 |          |
| T:0.0099 | T:0.003  | T:0      | T:0.0606 |
| A:0.3601 | A:0.3698 | A:0.4162 | A:0.1751 |
| G:0.4534 | G:0.5477 | G:0.5634 | G:0.6861 |
| A:0.2847 | A:0.0596 | A:0.1861 | A:0.0769 |
|          |          |          | T:0.4164 |
| G:0.7679 | G:0.6789 | G:0.5072 |          |
| C:0      | C:0.0537 | C:0.0133 | C:0.0052 |
| T:0.1438 | T:0.0437 | T:0.135  | T:0.1808 |
| A:0.1905 | A:0.0517 | A:0.0511 |          |
| G:0      | G:0.0109 | G:0      | G:0.0018 |
| T:0.2361 | T:0.1372 | T:0.0818 | T:0.1328 |
| T:0.4097 | T:0.2932 | T:0.2986 | T:0.4882 |
| C:0.4256 | C:0.3091 | C:0.3303 | C:0.6664 |
| T:0      | T:0.0219 | T:0.002  | T:0.0036 |
| G:0.8869 | G:0.8091 | G:0.772  | G:0.6893 |
| C:0.37   | C:0.3121 | C:0.2761 | C:0.3924 |
| T:0.005  | T:0.2475 | T:0.1166 | T:0.1416 |
| G:0      | G:0.001  | G:0      |          |

VEP annotated somatic variants

|          |          |          |          |
|----------|----------|----------|----------|
| G:0.3542 | G:0.1412 | G:0.2587 | G:0.2385 |
| C:0.6379 | C:0.6421 | C:0.6288 | C:0.8197 |
| A:0.254  | A:0.5567 | A:0.4264 | A:0.4172 |
| T:0.0565 | T:0.341  | T:0.3098 |          |
| G:0.3403 | G:0.1759 | G:0.4959 | G:0.1852 |
| G:0.0139 | G:0.2734 | G:0.1462 |          |
| C:0.0129 | C:0.0447 | C:0.0256 |          |
| C:0.7917 | C:0.6431 | C:0.6217 | C:0.3799 |
| C:0.1002 | C:0.2992 | C:0.2342 | C:0.0583 |
| A:0.7361 | A:0.4821 | A:0.593  |          |
| A:0.4613 | A:0.3887 | A:0.5368 |          |
| T:0.4613 | T:0.3887 | T:0.5368 | T:0.5808 |
| G:0.2044 | G:0.175  | G:0.3487 | G:0.7084 |
| G:0.1488 | G:0.3211 | G:0.2382 |          |
| C:0.6409 | C:0.3181 | C:0.2883 |          |
| C:0.0466 | C:0.0467 | C:0.0378 | C:0.2044 |
| C:0      | C:0.0388 | C:0.0184 | C:0.0112 |
| T:0.001  | T:0.1004 | T:0.0757 | T:0.1076 |
| T:0.0496 | T:0.1342 | T:0.1002 | T:0.1634 |
| C:0.4196 | C:0.2256 | C:0.2546 | C:0.1221 |
| A:0.5496 | A:0.0944 | A:0.2004 | A:0.0629 |
| T:0.7361 | T:0.4821 | T:0.6033 |          |
| A:0.1478 | A:0.2634 | A:0.1278 | A:0.1577 |
| C:0.2024 | C:0.2952 | C:0.1084 | C:0.4031 |
| T:0.376  | T:0.0755 | T:0.1728 |          |
| A:0      | A:0.0179 | A:0.0143 | A:0.0059 |
| T:0.0536 | T:0.4433 | T:0.3016 |          |
| C:0.0446 | C:0.4423 | C:0.3016 | C:0.2816 |
| A:0.9643 | A:0.4304 | A:0.8129 | A:0.3738 |
| T:0.3046 | T:0.3698 | T:0.3108 |          |
| T:0      | T:0.007  | T:0.001  | T:0.0014 |
| T:0.2103 | T:0.2922 | T:0.1237 | T:0.1406 |
| C:0.0794 | C:0.3936 | C:0.3793 | C:0.2338 |
| A:0.0665 | A:0.0915 | A:0.1391 | A:0.1059 |
| C:0.001  | C:0.1332 | C:0.0174 | C:0.1661 |
| T:0.8403 | T:0.1909 | T:0.2914 |          |
| T:0.002  | T:0.1054 | T:0.1104 |          |
| T:0.3353 | T:0.3688 | T:0.3252 | T:0.3728 |
| G:0.3313 | G:0.3022 | G:0.3078 | G:0.0737 |
| T:0      | T:0.3529 | T:0.136  |          |
| C:0      | C:0.0298 | C:0.0041 | C:0.0064 |
| A:0.2946 | A:0.3628 | A:0.3415 | A:0.0994 |
| T:0.8333 | T:0.5328 | T:0.6043 | T:0.6568 |
| T:0      | T:0.004  | T:0.0082 | T:0.0008 |
| A:0.1944 | A:0.2008 | A:0.2403 | A:0.1194 |
| G:0.5784 | G:0.6978 | G:0.817  |          |

VEP annotated somatic variants

|                                                                                                                          |                                                                                                                                 |                                                                                                                               |                                                                                                                           |
|--------------------------------------------------------------------------------------------------------------------------|---------------------------------------------------------------------------------------------------------------------------------|-------------------------------------------------------------------------------------------------------------------------------|---------------------------------------------------------------------------------------------------------------------------|
| A:0.5<br>G:0.4077<br>A:0.1032<br>-:0.5079<br>C:0.5387                                                                    | A:0.496<br>G:0.34<br>A:0.2356<br>-:0.1133<br>C:0.4245                                                                           | A:0.409<br>G:0.4172<br>A:0.0777<br>-:0.0971<br>C:0.4928                                                                       | A:0.8986<br>G:0.8497<br>A:0.2796<br><br>C:0.4641                                                                          |
| A:0.002<br>A:0.4345                                                                                                      | A:0.0149<br>A:0.2694                                                                                                            | A:0.002<br>A:0.2495                                                                                                           | A:0.0048<br>A:0.1761                                                                                                      |
| C:0<br>T:0.6032                                                                                                          | C:0.004<br>T:0.4642                                                                                                             | C:0<br>T:0.5491                                                                                                               | C:0                                                                                                                       |
| T:0.255<br>C:0.256                                                                                                       | T:0.4781<br>C:0.4791                                                                                                            | T:0.4581<br>C:0.4591                                                                                                          | T:0.2736                                                                                                                  |
| G:0.4325<br>C:0.0933<br>G:0.1012<br>A:0.0933<br>-:0.001                                                                  | G:0.0368<br>C:0.1451<br>G:0.1531<br>A:0.1451<br>-:0.0219                                                                        | G:0.0603<br>C:0.228<br>G:0.2352<br>A:0.229<br>-:0.0215                                                                        | G:0.1847<br><br><br>A:0.1527<br>-:0.0068                                                                                  |
| G:0<br>A:0.0119<br>A:0.2589<br>C:0.1389<br>C:0.498                                                                       | G:0.0308<br>A:0.3986<br>A:0.4821<br>C:0.2028<br>C:0.1948                                                                        | G:0.0123<br>A:0.1217<br>A:0.6892<br>C:0.0941<br>C:0.4703                                                                      | G:0.008<br><br>A:0.4387<br>C:0.1745<br>C:0.0644                                                                           |
| G:0<br>T:0.5327<br>C:0.8492<br>T:0.245<br>G:0.2808<br>A:0.3571<br>T:0.3562<br>C:0.3869<br>G:0.3869<br>G:0.001<br>T:0.004 | G:0.001<br>T:0.2028<br>C:0.6412<br>T:0.4016<br>G:0.2594<br>A:0.2654<br>T:0.2594<br>C:0.3032<br>G:0.3032<br>G:0.1948<br>T:0.2644 | G:0.001<br>T:0.2853<br>C:0.6483<br>T:0.3978<br>G:0.2342<br>A:0.4049<br>T:0.4049<br>C:0.4335<br>G:0.456<br>G:0.1575<br>T:0.183 | G:0<br>T:0.0803<br>C:0.1766<br>T:0.246<br>G:0.249<br>A:0.3529<br>T:0.1659<br>C:0.8496<br>G:0.8351<br>G:0.1976<br>T:0.0608 |
| G:0.6925<br>C:0.6915                                                                                                     | G:0.5964<br>C:0.6064                                                                                                            | G:0.6012<br>C:0.6094                                                                                                          | C:0.8886                                                                                                                  |
| T:0.2321<br>C:0.2331<br>T:0.1042<br>C:0.5099<br>T:0.2103<br>A:0.504<br>A:0.7599<br>T:0<br>G:0<br>T:0.6567                | T:0.2783<br>C:0.2793<br>T:0.0815<br>C:0.2177<br>T:0.2286<br>A:0.2545<br>A:0.3529<br>T:0.0477<br>G:0.0229<br>T:0.7455            | T:0.2761<br>C:0.2761<br>T:0.0245<br>C:0.4816<br>T:0.089<br>A:0.2975<br>A:0.4417<br>T:0.0041<br>G:0.002<br>T:0.7761            | T:0.0845<br><br>C:0.0526<br>T:0.0118<br>C:0.6369<br><br>A:0.2001<br><br>T:0.01<br>G:0.0046<br>T:0.7326                    |

VEP annotated somatic variants

ACACAGGTGTTTT:0.69(ACACAGGTGTTTT:0.81(ACACAGGTGTTTT:0.8712

|          |          |          |          |
|----------|----------|----------|----------|
| C:0.0982 | C:0.334  | C:0.3599 | C:0.645  |
| T:0      | T:0.001  | T:0.001  | T:0      |
| C:0      | C:0.006  | C:0      | C:0.0009 |
| C:0.0288 | C:0.1461 | C:0.1677 | C:0.2065 |
| T:0.1071 | T:0.1948 | T:0.2638 | T:0.1777 |
| C:0.5804 | C:0.3121 | C:0.3047 |          |
| A:0      | A:0.1292 | A:0.0112 | A:0.021  |
| G:0.4901 | G:0.4245 | G:0.3681 | G:0.1014 |
| G:0.0744 | G:0.1312 | G:0.0982 | G:0.2195 |
| A:0.0744 | A:0.1441 | A:0.1012 | A:0.2036 |
| G:0.3998 | G:0.1909 | G:0.5112 |          |
| T:0      | T:0.1461 | T:0.0112 | T:0.0329 |
| G:0.6369 | G:0.4771 | G:0.5031 |          |
| A:0.1448 | A:0.1809 | A:0.274  | A:0.2458 |
| C:0.3581 | C:0.2197 | C:0.2188 | C:0.293  |
| C:0.3631 | C:0.3241 | C:0.3119 | C:0.3117 |
| A:0.2242 | A:0.5666 | A:0.4141 |          |
| T:0      | T:0.001  | T:0      | T:0      |
| T:0.2659 | T:0.3231 | T:0.3374 |          |
| C:0.3433 | C:0.4463 | C:0.4611 | C:0.4898 |
| C:0.2738 | C:0.4592 | C:0.4928 |          |
| G:0.2927 | G:0.495  | G:0.5992 |          |
| C:0.2718 | C:0.3917 | C:0.3896 | C:0.1437 |
| T:0.001  | T:0.2793 | T:0.1984 | T:0.1078 |
| G:0.0446 | G:0.1213 | G:0.0297 | G:0.0455 |
| G:0      | G:0.1074 | G:0.0092 |          |
| G:0.4494 | G:0.0934 | G:0.0644 | G:0.203  |
| T:0      | T:0.007  | T:0      |          |
| G:0.3968 | G:0.5895 | G:0.6493 | G:0.7651 |
| C:0.3552 | C:0.3141 | C:0.5276 |          |
| G:0.1806 | G:0.2565 | G:0.3129 |          |
| A:0.3085 | A:0.2416 | A:0.2096 |          |
| C:0.4534 | C:0.3648 | C:0.3722 | C:0.7567 |
| C:0.1627 | C:0.168  | C:0.1196 | C:0.2336 |
| A:0.1637 | A:0.2445 | A:0.226  | A:0.335  |
| T:0.6736 | T:0.2535 | T:0.2832 | T:0.0833 |
| A:0.245  | A:0.2087 | A:0.1789 |          |
| G:0.8512 | G:0.8091 | G:0.8252 | G:0.3391 |
| T:0.5258 | T:0.6004 | T:0.5624 |          |
| A:0.369  | A:0.3499 | A:0.3517 | A:0.3073 |
| T:0.5962 | T:0.6362 | T:0.6626 | T:0.5546 |
| G:0      | G:0.001  | G:0.001  | G:0.0005 |
| A:0.001  | A:0.0636 | A:0.0307 |          |
| A:0.002  | A:0.0109 | A:0.0194 | A:0.0018 |
| T:0      | T:0.0278 | T:0.0092 | T:0.0054 |
| C:0.7996 | C:0.5805 | C:0.7025 | C:0.919  |

VEP annotated somatic variants

|                                                                                                                                                                                  |                                                                                                                                                                                            |                                                                                                                                                                                       |                                                                                                                                                                                                                                                                |
|----------------------------------------------------------------------------------------------------------------------------------------------------------------------------------|--------------------------------------------------------------------------------------------------------------------------------------------------------------------------------------------|---------------------------------------------------------------------------------------------------------------------------------------------------------------------------------------|----------------------------------------------------------------------------------------------------------------------------------------------------------------------------------------------------------------------------------------------------------------|
| G:0.1637<br>G:0.003                                                                                                                                                              | G:0.3101<br>G:0.0785                                                                                                                                                                       | G:0.2873<br>G:0.09                                                                                                                                                                    |                                                                                                                                                                                                                                                                |
| T:0.8442                                                                                                                                                                         | T:0.7058                                                                                                                                                                                   | T:0.7965                                                                                                                                                                              | T:0.7156                                                                                                                                                                                                                                                       |
| A:0.374                                                                                                                                                                          | A:0.2078                                                                                                                                                                                   | A:0.2198                                                                                                                                                                              |                                                                                                                                                                                                                                                                |
| G:0<br>T:0.2312                                                                                                                                                                  | G:0.001<br>T:0.0457                                                                                                                                                                        | G:0<br>T:0.0849                                                                                                                                                                       | G:0.0583<br>T:0.1468                                                                                                                                                                                                                                           |
| G:0.1756<br>A:0.5813<br>C:0.7361<br>T:0.4177<br>A:0.4177<br>T:0.4177<br>A:0.5179<br>T:0.5149<br>G:0.3869<br>A:0<br>T:0<br>A:0<br>C:0.1696                                        | G:0.3698<br>A:0.7256<br>C:0.3718<br>T:0.334<br>A:0.333<br>T:0.327<br>A:0.6511<br>T:0.5815<br>G:0.5427<br>A:0.0149<br>T:0.004<br>A:0.0159<br>C:0.0795                                       | G:0.3926<br>A:0.5695<br>C:0.4755<br>T:0.3609<br>A:0.3609<br>T:0.3589<br>A:0.6053<br>T:0.5869<br>G:0.4714<br>A:0.0061<br>T:0<br>A:0<br>C:0.2597                                        | G:0.1214<br>A:0.5197<br><br>A:0.1798<br>T:0.4167<br>A:0.8593<br>T:0.8182<br>G:0.3647<br>A:0.003<br>T:0<br>A:0.0029<br><br>-:0.529<br><br>A:0.0255<br>G:0.5145<br>C:0.2029<br>G:0.069<br>T:0.1736<br><br>T:0.03<br>A:0.0011<br>A:0.0048<br>C:0.5918<br>C:0.4041 |
| C:0.1776<br>A:0.4117<br>A:0.0665<br>G:0.6151<br>C:0.129<br>G:0.3343<br>T:0.127<br>C:0.4008<br>T:0.2639<br>T:0.0149<br>A:0<br>C:0.4067<br>A:0<br>C:0.0565<br>C:0.1161<br>T:0.7569 | C:0.2873<br>A:0.3668<br>A:0.1322<br>G:0.4612<br>C:0.2008<br>G:0.1402<br>T:0.1581<br>C:0.1571<br>T:0.0288<br>T:0.165<br>A:0.007<br>C:0.3111<br>A:0.0099<br>C:0.3917<br>C:0.4175<br>T:0.6362 | C:0.1789<br>A:0.364<br>A:0.1166<br>G:0.3262<br>C:0.2096<br>G:0.1585<br>T:0.1503<br>C:0.1299<br>T:0.0992<br>T:0.0276<br>A:0.001<br>C:0.1973<br>A:0<br>C:0.3804<br>C:0.3681<br>T:0.6554 | G:0.1541<br><br>T:0.3938<br>G:0.2464<br>G:0.1515<br>G:0.8963<br>A:0.062<br>T:0.0236                                                                                                                                                                            |
| G:0.6806<br>C:0.6855<br>T:0.2778<br>G:0.0258<br>G:0.7589<br>G:0.881<br>A:0.752<br>T:0                                                                                            | G:0.2744<br>C:0.2972<br>T:0.6382<br>G:0.0169<br>G:0.1412<br>G:0.4821<br>A:0.1441<br>T:0.1233                                                                                               | G:0.3211<br>C:0.365<br>T:0.3661<br>G:0.0143<br>G:0.2904<br>G:0.6309<br>A:0.2924<br>T:0.0429                                                                                           |                                                                                                                                                                                                                                                                |

VEP annotated somatic variants

|                   |                   |                   |             |
|-------------------|-------------------|-------------------|-------------|
| G:0               | G:0.0219          | G:0.0112          |             |
| G:0.001           | G:0               | G:0               |             |
| A:0.4802          | A:0.6014          | A:0.6176          | A:0.3797    |
| T:0.625           | T:0.5388          | T:0.6155          |             |
| C:0.1597          | C:0.0616          | C:0.0133          | C:0.2758    |
| G:0.251           | G:0.2127          | G:0.1452          |             |
| T:0.1696          | T:0.2008          | T:0.274           |             |
| C:0.6508          | C:0.3718          | C:0.3732          | C:0.1402    |
| G:0.6875          | G:0.1292          | G:0.1329          | G:0.2528    |
| A:0.0556          | A:0.1153          | A:0.1176          | A:0.0207    |
| A:0.4474          | A:0.4443          | A:0.3405          |             |
| T:0.5992          | T:0.3827          | T:0.4796          | T:0.7938    |
| C:0.1984          | C:0.0348          | C:0.0511          | C:0.0325    |
| T:0.3621          | T:0.0686          | T:0.1278          |             |
| A:0.2292          | A:0.1421          | A:0.2577          |             |
| G:0.7103          | G:0.5129          | G:0.4867          | G:0.7791    |
| G:0.5228          | G:0.3131          | G:0.6503          | G:0.7131    |
| G:0.1627          | G:0.3608          | G:0.2025          | G:0.4075    |
| T:0.0337          | T:0.3211          | T:0.047           |             |
| C:0.6359          | C:0.503           | C:0.5634          | C:0.623     |
| C:0.0377          | C:0.1153          | C:0.2679          | C:0.158     |
| A:0.4782          | A:0.2326          | A:0.4397          | A:0.3282    |
| T:0.0427          | T:0.1869          | T:0.2515          | T:0.0317    |
| A:0.5238          | A:0.2813          | A:0.6104          | A:0.7074    |
| AAGT:0.6349       | AAGT:0.7763       | AAGT:0.7781       | AAGT:0.9064 |
| T:0.3393          | T:0.3459          | T:0.4366          | T:0.5675    |
| A:0.7758          | A:0.503           | A:0.636           | A:0.764     |
| C:0.629           | C:0.5089          | C:0.6043          | C:0.7059    |
| T:0.6885,T:0.6885 | T:0.6869,T:0.6869 | T:0.5123,T:0.5123 |             |
| T:0.0367          | T:0.3201          | T:0.0562          | T:0.0704    |
| C:0               | C:0.0099          | C:0               | C:0.0016    |
|                   |                   |                   | T:0.8023    |
| T:0.496           | T:0.337           | T:0.2321          | T:0.1138    |
| T:0.4038          | T:0.8161          | T:0.5818          | T:0.8429    |
| C:0.1875          | C:0.2525          | C:0.2342          | C:0.6158    |
| T:0.2431          | T:0.4085          | T:0.364           | T:0.7275    |

VEP annotated somatic variants

| EA_MAF                                  | CLIN_SIG                             | SOMATIC | PUBMED                              |
|-----------------------------------------|--------------------------------------|---------|-------------------------------------|
| C:0.0365                                |                                      |         |                                     |
| G:0.6569                                |                                      | 0,1     |                                     |
| G:0.6216<br>G:0.6969                    |                                      |         |                                     |
| T:0.2695<br>GAGCGGGCGA:0.12<br>A:0.2188 |                                      | 0,0,1   | 15459974                            |
| T:0.0289                                |                                      | 0,1     |                                     |
| G:0.3325                                |                                      |         |                                     |
| A:0.6387<br>A:0.4222                    |                                      |         | 17357082                            |
| T:0.2121                                |                                      | 0,1     |                                     |
| A:0.2642<br>G:0.4873                    |                                      | 0,1     | 16385451                            |
| T:0.5827<br>G:0.0156<br>G:0.1509        |                                      |         |                                     |
| C:0.1944<br>C:0.6126<br>A:0.0517        |                                      | 0,1,1,1 | 16385451                            |
| C:0.4233<br>T:0.4664                    |                                      | 0,1     | 18,21671168,21846682,19<br>18782849 |
| C:0.1119<br>T:0.8297<br>T:0.3099        |                                      | 0,1,1   |                                     |
| T:0.0217,T:0.0217<br>T:0.2574           | not_provided,benign<br>likely_benign | 0,1     | 22412862<br>23320549<br>24419040    |
| T:0.4004                                | benign                               |         |                                     |
| T:0.7022                                |                                      |         | 25887478                            |

VEP annotated somatic variants

|                                                         |                              |                   |
|---------------------------------------------------------|------------------------------|-------------------|
| A:0.3323<br>A:0.17                                      |                              |                   |
| T:0.0869                                                |                              |                   |
| G:0.7585                                                | 0,1                          |                   |
| G:0.2784<br>-:0.1939<br>A:0.1349                        |                              | 24849541          |
|                                                         | 0,1                          |                   |
| C:0.8133<br>G:0.0828<br>A:0.1248<br>T:0.061<br>T:0.0377 | 0,1,1                        |                   |
| C:0.0059                                                |                              |                   |
|                                                         | 0,1                          |                   |
|                                                         |                              | 18511455          |
| T:0.0317                                                | 0,1                          |                   |
| G:0.0695<br>G:0.3177<br>C:0.1131<br>T:0.0784            |                              |                   |
| C:0.3036<br>C:0.1671                                    | 0,1,1,1,1,1,1,1,1<br>0,1,1,1 | 18499081,23103231 |
| A:0.0779<br>T:0.5469                                    |                              |                   |
| G:0.2367                                                |                              |                   |
| A:0.1476<br>A:0.0771                                    | benign                       |                   |
| T:0.2767                                                |                              |                   |
| -:0.0499                                                |                              |                   |



### VEP annotated somatic variants

|                                                                   |                                     |  |  |                                                |
|-------------------------------------------------------------------|-------------------------------------|--|--|------------------------------------------------|
| T:0.5403<br>A:0.3617<br>G:0.3652                                  |                                     |  |  |                                                |
| A:0.5982                                                          |                                     |  |  |                                                |
| G:0.1535<br>C:0.0464                                              |                                     |  |  | 0,1                                            |
| A:0.0324<br>T:0.1171<br>G:0.3253<br>G:0.0793                      | benign<br>likely_benign             |  |  |                                                |
| A:0.2249                                                          |                                     |  |  |                                                |
| A:0.3<br>G:0.4858<br>T:0.2577<br>T:0.9099<br>G:0.3805<br>C:0.3068 |                                     |  |  | 0,1                                            |
| A:0.755                                                           |                                     |  |  | 0,0,1<br>17827388<br>19733838                  |
| A:0.3376<br>G:0.1419                                              | benign<br>benign                    |  |  | 0,1<br>14740319,23559858<br>25260659           |
| T:0.1784                                                          |                                     |  |  |                                                |
| G:0.08                                                            | benign                              |  |  | 18603647,18614612                              |
| T:0.0064                                                          | not_provided<br>not_provided        |  |  | 12466288,17916242<br>21356067                  |
| T:0.1522<br>A:0.3483<br>G:0.0333<br>C:0.0849                      | uncertain_significance,not_provided |  |  | 19276285,19644020,17428325,213560<br>0,1,1,1,1 |
| A:0.1271                                                          |                                     |  |  | 0,1                                            |
| T:0.682<br>G:0.302                                                |                                     |  |  | 0,1,1                                          |

VEP annotated somatic variants

|                   |              |                |                          |
|-------------------|--------------|----------------|--------------------------|
| C:0.3199          |              | 0,1,1          |                          |
| C:0.0699          |              |                |                          |
| -:0.1544          |              |                |                          |
| A:0.0918          |              |                | 17878953                 |
| C:0.3059          |              |                |                          |
| C:0.4868          |              | 0,1,1,1,1      |                          |
| C:0.232           |              |                |                          |
| G:0.089           | pathogenic   | 0,0,1<br>0,1,1 | 18840896,19778426        |
| C:0.1142          |              |                |                          |
| C:0.1707          |              |                |                          |
| T:0.6173          |              |                | 16355111,18631248,214621 |
| G:0.0907          |              |                |                          |
| C:0.1949          |              |                | 18648537                 |
|                   |              | 0,1            |                          |
| A:0.0189          |              |                |                          |
| T:0.0045          |              |                |                          |
| C:0.1932          |              | 0,1            |                          |
| G:0.1002          |              |                |                          |
| A:0.0047          |              |                |                          |
| T:0.1688          |              |                |                          |
| T:0.136           |              | 0,1,1,1        |                          |
| T:0.0037          |              |                |                          |
| C:0.2924          |              |                |                          |
| A:0.3329          |              |                |                          |
| G:0.1983          |              |                |                          |
| T:0.1248,T:0.1248 | not_provided |                | 17556197,24917393        |
| T:0.0172          |              |                |                          |
| -:0.4809          |              |                |                          |
| A:0.2629          |              | 0,1            |                          |

VEP annotated somatic variants

|          |                        |       |                          |
|----------|------------------------|-------|--------------------------|
| A:0.3025 |                        |       |                          |
| G:0.0034 |                        |       |                          |
| G:0.0024 |                        |       |                          |
| A:0.155  |                        |       |                          |
| A:0.2224 |                        |       |                          |
| A:0.1453 |                        |       |                          |
|          |                        |       | 23150742                 |
| A:0.1455 |                        |       | 18172114                 |
| G:0.3555 |                        | 0,1   |                          |
| -:0.3166 |                        | 0,0,1 |                          |
| G:0.6117 |                        |       |                          |
| C:0.1349 |                        | 0,1   | 37,24140460,20061190,20  |
|          |                        |       | 19680542,16621965,185986 |
| -:0.044  |                        | 0,1   |                          |
| C:0.341  |                        |       |                          |
| T:0.4209 |                        |       |                          |
| C:0.6407 |                        |       |                          |
| T:0      |                        |       |                          |
| A:0.03   |                        |       |                          |
| G:0.1899 |                        | 0,1   |                          |
| A:0.0119 |                        |       |                          |
| A:0.1329 |                        |       |                          |
| G:0.3171 |                        |       |                          |
| A:0.1132 |                        | 0,1   |                          |
| C:0.1954 |                        | 0,1   |                          |
| -:0.2671 |                        |       |                          |
| T:0.0886 |                        |       |                          |
| T:0.6724 |                        |       |                          |
| T:0.5513 |                        |       |                          |
|          | pathogenic,risk_factor | 0,0,1 | 93,20689796,18081690,2   |
| A:0.2164 |                        | 0,0,1 | 728845,18992954,164366   |
| C:0.0894 |                        |       |                          |
|          |                        | 0,1   |                          |

VEP annotated somatic variants

|                                                         |        |       |                          |
|---------------------------------------------------------|--------|-------|--------------------------|
| C:0.318<br>T:0.1266                                     |        | 0,1   | 20736995                 |
| A:0.0814<br>T:0.5607<br>A:0.3128                        | benign |       | 20211854,22461888,210722 |
| C:0.8793<br>C:0.0414                                    |        |       | 22140480                 |
| G:0.2359                                                | benign |       |                          |
| T:0.1029<br>A:0.9041                                    |        |       | 21750702                 |
| A:0.2926                                                |        |       |                          |
| T:0.2709                                                |        | 0,0,1 | 567136,19016476,181793   |
| C:0.4202<br>G:0.1733                                    | benign | 0,1   |                          |
| T:0.0102<br>G:0.4255<br>G:0.2389                        |        | 0,1   |                          |
| A:0.4849<br>C:0.149<br>A:0.0208<br>A:0.3923<br>C:0.2069 |        | 0,1   |                          |
| C:0.5173                                                | benign |       | 12958705                 |
| G:0.3949<br>G:0.1749                                    | benign | 0,0,1 | 168589,21304959,168169   |
| G:0.0733                                                |        | 0,1   |                          |
| G:0.007                                                 |        |       |                          |
| T:0.1117                                                |        | 0,1,1 |                          |
| T:0.0101                                                |        |       |                          |
| A:0.6012                                                |        |       |                          |

VEP annotated somatic variants

|                                                         |              |                   |
|---------------------------------------------------------|--------------|-------------------|
| G:0.5134<br>A:0.4624                                    | 0,1          | 19675668          |
| C:0.2893<br>T:0.283<br>A:0.0395                         | 0,1          |                   |
| G:0.0113                                                |              |                   |
| T:0.7042<br>T:0.7045<br>A:0.2187                        | 0,1<br>0,1,1 |                   |
| T:0.2402<br>A:0.5022<br>A:0.2534<br>C:0.321<br>G:0.6802 | 0,1<br>0,1   | 23420841          |
| C:0.1627                                                |              |                   |
| G:0.4265<br>A:0.1484                                    |              | 20068590          |
| G:0.3065                                                | 0,1          | 25162786,22962485 |
| T:0.1538                                                |              | 24086769          |
| G:0.2801                                                | 0,1          |                   |
| A:0.0002<br>T:0.5429                                    |              |                   |
| T:0.3231                                                |              |                   |
| A:0.2556                                                |              |                   |
| G:0.3501                                                |              | 18347602          |
| T:0.0066                                                | 0,1          | 21559497          |

VEP annotated somatic variants

|                                                                                                                      |        |       |                                        |
|----------------------------------------------------------------------------------------------------------------------|--------|-------|----------------------------------------|
| T:0.2162<br>G:0.0969                                                                                                 |        |       | 16385451                               |
| G:0.492                                                                                                              |        |       |                                        |
| G:0.358                                                                                                              |        |       |                                        |
| G:0.0534                                                                                                             |        |       |                                        |
| C:0.3358<br>C:0.0779<br>A:0.0247                                                                                     |        |       |                                        |
| G:0.3624                                                                                                             |        |       |                                        |
| A:0.0167<br>C:0.2266<br>C:0.66                                                                                       |        | 0,1   | 20031578                               |
| T:0.1937<br>A:0.0447<br>T:0.3563<br>C:0.3573<br>A:0.3737<br>A:0.2067<br>-:0.0151<br>A:0.7359<br>T:0.1435<br>T:0.0378 | benign | 0,1,1 |                                        |
| C:0.0003<br>C:0.0185<br>A:0.2313<br>C:0.2736<br>C:0.1984<br>A:0.1014                                                 |        | 0,1   | 22155192                               |
| A:0.0755<br>G:0.4338<br>A:0.1398                                                                                     |        |       | 21397065                               |
| T:0.4571                                                                                                             |        |       | 24886237,24633486,19593725,24123836,24 |
| -:0.1138<br>A:0.2872                                                                                                 |        |       |                                        |

VEP annotated somatic variants

|          |               |         |                                   |
|----------|---------------|---------|-----------------------------------|
| T:0.2337 |               | 0,1,1   |                                   |
| G:0.6197 |               |         |                                   |
| T:0.6748 | likely_benign | 0,1,1   |                                   |
| T:0.2581 |               |         |                                   |
| A:0.4344 |               | 0,1     |                                   |
| T:0.3686 |               | 0,1     |                                   |
| G:0.3806 |               | 0,1     |                                   |
| T:0.4199 |               |         | 17672902                          |
| G:0.3599 |               |         |                                   |
| C:0.6195 |               | 0,1     |                                   |
| C:0.0399 |               |         |                                   |
| G:0.0483 |               |         |                                   |
| T:0.0492 |               | 0,1     | 19299629,24447348                 |
| C:0.021  |               |         |                                   |
| A:0.0771 |               |         |                                   |
|          | benign        | 0,0,1   | 35,17498780,18992263,17           |
| T:0.1016 |               | 0,1     |                                   |
| A:0.143  |               |         | 21927923                          |
| A:0.446  |               |         |                                   |
| A:0.0857 | benign        |         |                                   |
| A:0.5587 | benign        | 0,1,1   |                                   |
| T:0.1525 |               | 0,1     |                                   |
| T:0.3457 |               |         |                                   |
| T:0.0298 |               |         |                                   |
| A:0.3748 |               | 0,0,1   | 515603,19846925,203371            |
| C:0.128  |               |         |                                   |
| C:0.1736 | benign        | 0,0,1,1 | 13,19552680,17209060,24           |
| T:0.1488 |               |         | 17209060                          |
|          | pathogenic    |         |                                   |
| A:0.2661 |               |         |                                   |
| G:0.1981 |               |         | 20565855,20427696,16893529,225633 |
| G:0.1695 |               |         |                                   |
| A:0.271  |               | 0,1     | 18454203                          |
| C:0.7387 |               |         |                                   |
| C:0.1518 |               |         |                                   |
| A:0.0139 |               |         |                                   |
| A:0.0949 |               |         |                                   |

VEP annotated somatic variants

|                   |            |           |                                                                                                    |
|-------------------|------------|-----------|----------------------------------------------------------------------------------------------------|
| G:0.2451          |            |           |                                                                                                    |
| A:0.8503          |            |           |                                                                                                    |
| G:0.314           |            | 0,1       |                                                                                                    |
| T:0.0285          |            |           |                                                                                                    |
| G:0.6713          |            |           |                                                                                                    |
| C:0.6717,C:0.6717 |            |           |                                                                                                    |
| C:0.4674          |            |           |                                                                                                    |
| C:0.1844          |            |           | 20105321                                                                                           |
| A:0.1905          |            | 0,1       |                                                                                                    |
| A:0.1796          |            |           |                                                                                                    |
| A:0.2014          |            |           | 20679621,24511462,239891                                                                           |
| T:0.0007          |            |           |                                                                                                    |
| C:0.1073          |            |           |                                                                                                    |
| A:0.292           |            |           |                                                                                                    |
| A:0.2558          |            |           |                                                                                                    |
| A:0.3119          |            |           |                                                                                                    |
| A:0.4093          |            | 0,1       |                                                                                                    |
| A:0.6895          | pathogenic | 0,0,1     | 39,20691689,21412156,2423650146,17263791,19190816,18848323,18772067,18974842,200315                |
| T:0.3427          |            |           | 17903299                                                                                           |
| T:0.0097          |            |           |                                                                                                    |
| A:0.0568          |            |           |                                                                                                    |
| A:0.1977          |            |           |                                                                                                    |
| A:0.0163          | benign     |           | 19453265,19727905,241761                                                                           |
| T:0.0565          |            | 0,0,1     | 15858076,23350966                                                                                  |
| -:0.3627          |            | 0,1       |                                                                                                    |
| T:0.7351          |            |           |                                                                                                    |
| G:0.77            |            | 0,1       |                                                                                                    |
| C:0.2233          |            | 0,1       | 19276632                                                                                           |
| C:0.7656          | benign     | 0,1,1,1,1 | 15922487,17119116,17286537,18842806,2423650146,17263791,19190816,18848323,18772067,18974842,200315 |



VEP annotated somatic variants

|          |        |         |                               |
|----------|--------|---------|-------------------------------|
| T:0.3771 |        | 0,1,1   |                               |
| A:0.3261 |        |         |                               |
| T:0.3624 |        |         |                               |
| T:0.3325 |        |         |                               |
|          |        |         |                               |
| T:0.0096 |        |         |                               |
| A:0.356  |        |         |                               |
| C:0.4122 |        |         |                               |
| C:0.5239 |        |         | 17357072                      |
|          |        |         |                               |
| T:0.3221 |        |         |                               |
| T:0.4092 |        |         |                               |
|          |        |         |                               |
| A:0.5178 | benign |         | 20886637                      |
|          |        |         |                               |
| T:0.0278 |        |         |                               |
| G:0.3833 |        |         |                               |
| T:0.242  |        |         | 21819567                      |
| G:0.3819 |        | 0,1     |                               |
| T:0.4197 |        | 0,1     |                               |
| C:0.0221 |        |         |                               |
| A:0.022  |        |         |                               |
|          |        |         |                               |
| T:0.1752 |        |         |                               |
| A:0.1752 |        | 0,1     |                               |
| T:0.1741 |        |         |                               |
| G:0.1477 |        | 0,1     |                               |
| G:0.2788 |        | 0,1,1   |                               |
|          |        |         |                               |
| C:0.0717 |        |         | 16385451                      |
| G:0.2646 |        |         |                               |
| G:0.0028 |        |         |                               |
| T:0.3166 |        |         |                               |
| G:0.0517 |        | 0,1     |                               |
| A:0.0432 |        |         |                               |
| A:0.051  |        |         |                               |
| A:0.0068 |        |         |                               |
| A:0.4697 |        | 0,1     | 19430760                      |
| A:0.133  |        | 0,1     |                               |
| A:0.3533 |        |         |                               |
|          |        |         |                               |
| A:0.4828 |        |         | 23201419,24671236,25201284,18 |
| C:0.9503 |        |         |                               |
| G:0.1274 |        |         |                               |
| A:0.0992 |        |         |                               |
|          |        |         |                               |
| T:0.2625 |        | 0,1     |                               |
| T:0.2015 |        | 0,1,1   |                               |
| A:0.0992 |        |         | 19640273                      |
| A:0.3152 |        | 0,1,1,1 |                               |

VEP annotated somatic variants

|                                                                      |                                                 |                                               |                                        |
|----------------------------------------------------------------------|-------------------------------------------------|-----------------------------------------------|----------------------------------------|
| C:0.127<br>A:0.0928                                                  |                                                 | 18787502,18035074,18403734,25093390,17<br>0,1 |                                        |
| A:0.5094<br>C:0.4393                                                 |                                                 | 0,1<br>0,1                                    |                                        |
| A:0.2477<br>A:0.1457<br>G:0.0322<br>C:0.3261                         |                                                 | 0,1,1                                         |                                        |
| A:0.0154                                                             |                                                 |                                               |                                        |
| A:0.6456                                                             |                                                 |                                               | 18484081<br>22669415                   |
| T:0.2787                                                             |                                                 | 0,1,1,1                                       | 18329248,19156168                      |
| T:0.0335                                                             |                                                 |                                               |                                        |
| T:0.3355                                                             |                                                 |                                               | 17601350,21320344,18559526,18709160,24 |
| T:0.1897                                                             |                                                 |                                               |                                        |
| A:0.6153<br>C:0.331                                                  |                                                 |                                               |                                        |
| C:0.7166                                                             |                                                 |                                               |                                        |
| A:0.0587<br>T:0.5927<br>A:0.0407<br>A:0.0508<br>T:0.0519<br>C:0.4708 |                                                 | 0,1,1,1<br><br><br><br>0,1                    |                                        |
| C:0.4183<br>T:0.1267                                                 |                                                 |                                               |                                        |
| T:0.0031<br>C:0.0179<br>A:0.4142<br>T:0.6188                         | not_provided,likely_benign,pathogenic<br>benign | 0,0,1,1                                       | 566314,24467728,194014                 |

VEP annotated somatic variants

|          |               |         |                                                 |
|----------|---------------|---------|-------------------------------------------------|
| A:0.4051 |               | 0,1     |                                                 |
| A:0.1102 |               | 0,1,1,1 |                                                 |
| T:0.469  |               |         |                                                 |
| T:0.2419 |               | 0,1     | 19043567,19664584                               |
| A:0.7018 |               |         |                                                 |
| T:0.6555 |               |         |                                                 |
| A:0.2386 |               |         | 18439552,20031592,219317                        |
| T:0.0339 |               |         |                                                 |
| C:0.121  |               |         |                                                 |
| A:0.0986 | benign        |         | 19843503                                        |
| A:0.2824 |               | 0,1     | 17135278,18783506                               |
| C:0.5378 | likely_benign |         |                                                 |
| T:0.2745 |               | 0,1,1   |                                                 |
| C:0.778  |               |         | 22137500                                        |
| G:0.317  |               | 0,0,1,1 | 26,18588853,21090563,20                         |
| A:0.2174 |               |         |                                                 |
| C:0.4475 |               |         |                                                 |
| G:0.3472 |               | 0,1     |                                                 |
| A:0.1497 |               |         |                                                 |
| G:0.1588 |               |         |                                                 |
| C:0.0668 |               |         |                                                 |
| G:0.4551 |               | 0,1     |                                                 |
| T:0.0065 |               |         |                                                 |
| T:0.0239 |               |         |                                                 |
| A:0.221  |               |         | 19434426,17348446,20226046,21                   |
| T:0.2416 | benign        | 0,0,1,1 | 22666415,24824313,22395465,16750516,24895547,21 |
| G:0.2436 |               |         | 51,25622255,21082232,25                         |
| A:0.0549 |               |         | 18411068,16473310                               |
| A:0.2957 |               |         |                                                 |
| C:0.013  |               |         |                                                 |

VEP annotated somatic variants

|          |        |                                   |                   |
|----------|--------|-----------------------------------|-------------------|
| C:0.6587 |        |                                   |                   |
| C:0.125  |        |                                   | 18348195          |
| A:0.2083 |        |                                   |                   |
|          |        | 23871474,24174267,21926974,244616 |                   |
| T:0.233  |        |                                   | 25505091          |
| G:0.8711 |        |                                   |                   |
| C:0.008  |        |                                   |                   |
| A:0.0156 |        |                                   |                   |
| A:0.1512 |        |                                   |                   |
| A:0.5249 |        |                                   |                   |
| G:0.7113 |        |                                   |                   |
| A:0.1194 |        |                                   |                   |
| G:0.2597 |        |                                   | 25155265          |
| T:0.2544 |        | 0,1                               |                   |
| -:0.3973 |        |                                   |                   |
| T:0.2024 |        |                                   |                   |
| A:0.3309 |        |                                   |                   |
| A:0.4209 |        | 0,1                               |                   |
| T:0.3624 |        | 0,1                               |                   |
| C:0.3449 |        |                                   | 16175505          |
| T:0.1647 |        |                                   |                   |
| C:0.0807 |        |                                   |                   |
| A:0.0324 |        |                                   |                   |
| T:0.0016 |        |                                   |                   |
| A:0.118  | benign | 0,1,1,1                           | 24943594,20442750 |
| G:0.4334 |        |                                   |                   |
| G:0.3402 |        | 0,1                               |                   |
| T:0.3398 |        | 0,1                               |                   |
| A:0.0055 |        | 0,1                               |                   |
| G:0.086  |        | 0,1,1                             |                   |
| A:0.0005 |        |                                   |                   |
| A:0.03   |        |                                   |                   |
| A:0.1286 |        |                                   |                   |
| T:0.0963 |        |                                   |                   |
| C:0.3472 |        |                                   |                   |

VEP annotated somatic variants

G:0.1762

17931948

C:0.0148  
A:0.6168  
G:0.7303  
T:0.6279

0,1

C:0.2692

C:0.7307  
C:0.6618  
G:0.7114  
T:0.0298

0,1

T:0.7115  
A:0.5694

A:0.2808  
G:0.3644

0,1,1,1

A:0.7221  
T:0.2435

A:0.2502

C:0.4261

C:0.0954

A:0.5935  
T:0.0699  
A:0.0006

A:0.3113

A:0.3457  
G:0.0347

20169177

G:0.0478  
A:0.0274  
G:0.3114

0,1

VEP annotated somatic variants

|                                                                      |        |                         |                         |
|----------------------------------------------------------------------|--------|-------------------------|-------------------------|
| T:0.3303                                                             |        |                         |                         |
|                                                                      | benign |                         | 16385451<br>16385451    |
| T:0.4786<br>C:0.0356<br>C:0.7187                                     |        |                         |                         |
| C:0.4156                                                             |        |                         |                         |
| C:0.1881<br>T:0.7001                                                 |        | 0,1                     |                         |
|                                                                      |        | 0,1                     |                         |
| G:0.4559<br>A:0.3388<br>C:0.467                                      |        | 0,1                     |                         |
| T:0.8867                                                             |        | 0,1                     |                         |
| C:0.015                                                              |        |                         |                         |
| C:0.2672<br>G:0.2501<br>T:0.2681<br>G:0.0286<br>A:0.4352<br>T:0.1939 |        | 0,1,1<br>0,1,1<br>0,1,1 | 16642431                |
| A:0.0004,A:0.0004                                                    | benign |                         |                         |
| C:0.622                                                              |        |                         |                         |
| C:0.0003                                                             |        | 0,1                     |                         |
| C:0.0019<br>G:0.4594                                                 |        |                         |                         |
| T:0.0595<br>T:0.2456<br>A:0.1234<br>A:0.2506                         |        |                         |                         |
| T:0.1694<br>T:0.127<br>A:0.3297                                      |        | 0,0,1,1,1,1             | 18,21787115,19536092,20 |
| G:0.3565                                                             |        |                         |                         |

VEP annotated somatic variants

|               |        |         |                        |
|---------------|--------|---------|------------------------|
| C:0.0918      |        |         |                        |
| C:0.2381      |        |         |                        |
| T:0.3556      |        |         |                        |
| T:0.2657      |        |         |                        |
| A:0.3531      |        |         | 16642439               |
| G:0.0094      |        |         |                        |
| A:0.4295      |        |         | 23946598               |
| A:0.726       |        |         | 23148531               |
| G:0.3305      |        | 0,1,1,1 |                        |
| G:0.7902      |        | 0,1,1,1 |                        |
| C:0.2852      |        | 0,1,1,1 |                        |
| G:0.3472      |        |         |                        |
| A:0.0262      |        |         |                        |
| T:0.0685      |        |         |                        |
| T:0.3027      |        |         | 16400609               |
| T:0.2388      |        | 0,1     | 24996771               |
| G:0.4134      | benign | 0,1     | 493349,18842806,219609 |
| T:0.6317      | benign |         | 19493349               |
| G:0.4195      |        |         |                        |
| A:0.61        |        |         |                        |
| GGGAGA:0.2376 |        |         |                        |
| C:0.3273      |        | 0,1,1   |                        |
|               |        | 0,1     |                        |
| C:0.5171      |        | 0,1     |                        |
| G:0.576       |        | 0,1,1   |                        |
| A:0.6147      |        | 0,1     |                        |
| -:0.7248      | benign |         | 23233322               |
| T:0.262       | benign | 0,1,1   | 20226094               |
| C:0.2881      |        |         |                        |
| T:0.1513      | benign | 0,1     | 20592870               |
| C:0.3634      |        |         |                        |
| A:0.7626      |        |         |                        |
| G:0.5355      |        |         |                        |
| T:0.0087      | benign |         | 21829377               |

VEP annotated somatic variants

|          |                        |         |                                              |
|----------|------------------------|---------|----------------------------------------------|
| T:0.1059 |                        | 0,1     |                                              |
| T:0.0529 |                        |         |                                              |
| G:0.509  |                        |         |                                              |
| T:0.4463 |                        |         |                                              |
| G:0.331  |                        | 0,1,1   | 12466288                                     |
| T:0.3296 |                        |         |                                              |
| C:0.3258 |                        | 0,1     |                                              |
| A:0.326  |                        |         |                                              |
| T:0.0741 |                        | 0,0,1,1 | 369270,24633158,181930                       |
| T:0.0087 |                        |         |                                              |
| A:0.0176 |                        |         |                                              |
| A:0.391  |                        |         |                                              |
| T:0.1343 | likely_benign          |         | 17601350,20819849                            |
| C:0.8154 |                        |         |                                              |
| T:0.1704 |                        | 0,1,1   |                                              |
| C:0.401  |                        |         |                                              |
| G:0.3001 |                        |         |                                              |
| C:0.0024 | likely_benign          |         |                                              |
| T:0.0165 |                        |         |                                              |
| G:0.6663 |                        |         |                                              |
| G:0.0785 |                        | 0,1     |                                              |
| G:0.3611 |                        |         |                                              |
| G:0.4653 |                        |         |                                              |
| T:0.7766 |                        |         |                                              |
| G:0.0081 |                        |         |                                              |
| G:0.0081 |                        |         |                                              |
| T:0.1528 |                        | 0,1     |                                              |
| A:0.0358 |                        |         |                                              |
| A:0.0258 |                        |         |                                              |
| G:0.3043 |                        |         |                                              |
| A:0.1049 |                        |         |                                              |
| G:0.0291 |                        |         |                                              |
|          |                        |         | 20602773,15707951,162023                     |
|          | pathogenic,risk_factor |         | 333443,23560644,24806096,19168583,20624112,2 |
| G:0.0627 |                        |         | 16729972                                     |
|          |                        |         | 16729972                                     |
| G:0.2015 |                        |         | 24861377,19752398                            |
| G:0.064  |                        | 0,1,1   |                                              |
| G:0.2107 |                        |         | 18340359,19732772,23565190,22                |



VEP annotated somatic variants

|            |        |       |                   |
|------------|--------|-------|-------------------|
| C:0.0498   | benign |       | 18001468          |
| T:0.0364   |        |       |                   |
| A:0.1863   |        | 0,1   |                   |
| T:0.0383   |        |       |                   |
| A:0.2287   |        |       |                   |
| G:0.363    |        | 0,1   |                   |
| T:0.1509   |        | 0,1   |                   |
| A:0.3941   |        |       |                   |
| C:0.6975   |        |       |                   |
| C:0.1654   |        |       |                   |
| A:0.0239   |        | 0,1,1 |                   |
| A:0.193    |        |       |                   |
| T:0.5372   |        | 1,0   |                   |
| A:0.0616   |        |       |                   |
| T:0.061    |        |       |                   |
| T:0.058    |        |       |                   |
| A:0.2802   |        | 0,1   |                   |
| G:0.3073   |        | 0,1   |                   |
| C:0.7885   |        | 0,1   |                   |
| A:0.0247   |        | 0,1   |                   |
| A:0.1637   |        |       |                   |
| G:0.1478   |        |       |                   |
| G:0.1741   |        | 0,1   |                   |
| G:0.1012   |        |       |                   |
| AGC:0.2795 |        |       |                   |
| G:0.1507   |        |       |                   |
| A:0.1919   |        | 0,1   |                   |
| T:0.0682   |        |       |                   |
| A:0.3151   |        |       |                   |
| A:0.0133   |        |       |                   |
| G:0.2118   |        | 0,1   |                   |
| A:0.3748   |        | 0,1   | 16038259,24223962 |

VEP annotated somatic variants

|          |         |                        |
|----------|---------|------------------------|
| A:0.1429 |         |                        |
| T:0.1271 | 0,1,1,1 |                        |
| G:0.018  |         |                        |
| G:0.0685 | 0,1,1   | 19714462               |
| G:0.2398 | 0,1     |                        |
| A:0.3733 | 0,0,1,1 | 547835,23918616,162563 |
| A:0.0112 |         |                        |
| T:0.4406 | 0,1     |                        |
| A:0.2973 | 0,1,1,1 |                        |
| A:0.1712 | 0,1     | benign                 |
| C:0.4329 | 0,1     | 14574644               |
| C:0.4367 | 0,1     |                        |
| G:0.3359 |         | 22504420,19148276      |
| G:0.3007 |         |                        |
| G:0.2854 | 0,1,1   |                        |
| A:0.1133 |         |                        |
| C:0.1264 | 0,1     |                        |
| A:0.2398 | 0,1     | 21247474               |
| G:0.2479 |         |                        |
| T:0.2057 | 0,1,1   |                        |
| G:0.4567 |         | 23840689               |
| T:0.3897 |         |                        |
| A:0.2389 | 0,1,1   |                        |
| G:0.2955 |         |                        |
| G:0.2492 |         |                        |
| G:0.0531 |         |                        |
| G:0.3302 |         |                        |
| A:0.3131 | 0,1     |                        |
| G:0.4137 |         |                        |
| A:0.1686 |         |                        |
| C:0.4725 |         |                        |
| T:0.1272 |         | 16828203               |
| A:0.1071 |         |                        |
| G:0.4441 |         |                        |

VEP annotated somatic variants

|          |                      |                                                              |                        |
|----------|----------------------|--------------------------------------------------------------|------------------------|
| T:0.2559 |                      |                                                              |                        |
| T:0.2857 |                      | 22865593,25139097,22001756,25992311,22359309,25687184,207298 |                        |
| G:0.6267 |                      |                                                              |                        |
| C:0.4294 | likely_benign        | 0,1,1,1,1,1,1                                                |                        |
| G:0.3868 | likely_benign        | 0,1,1,1,1,1,1                                                |                        |
|          | benign               |                                                              |                        |
| A:0.4082 |                      | 0,1,1,1,1,1,1                                                |                        |
| G:0.419  |                      | 0,1,1,1,1,1,1                                                | 19052777               |
| G:0.4404 |                      | 0,1,1,1,1,1,1                                                |                        |
| T:0.276  |                      |                                                              |                        |
| C:0.5238 |                      |                                                              |                        |
| T:0.2664 |                      |                                                              |                        |
| T:0.2865 |                      | 0,1,1,1                                                      | 19390624               |
| C:0.3327 |                      |                                                              | 19390624               |
| A:0.2118 | likely_benign        | 0,1,1                                                        |                        |
| G:0.115  |                      |                                                              | 21474826               |
|          |                      | 0,1,1,1,1                                                    |                        |
|          | likely_benign        | 377714,23334806,17187763,21178094,25043640,2                 |                        |
|          | benign,likely_benign | 0,0,1                                                        | 347532,22410809,251972 |
| C:0.607  |                      | 0,1                                                          |                        |
| G:0.3776 |                      |                                                              | 23324528               |
| C:0.2621 |                      |                                                              |                        |
| T:0.5932 |                      |                                                              | 23127126               |
| A:0.3756 |                      |                                                              |                        |
| C:0.576  |                      |                                                              |                        |
| T:0.346  |                      |                                                              |                        |
| C:0.3518 |                      |                                                              |                        |
| G:0.2255 |                      |                                                              |                        |
| G:0.3915 |                      |                                                              |                        |
| G:0.4582 |                      |                                                              | 19014520               |
| A:0.2838 |                      |                                                              |                        |
| A:0.0296 |                      |                                                              |                        |

### VEP annotated somatic variants

|                 |        |       |                   |
|-----------------|--------|-------|-------------------|
| A:0.1099        |        |       |                   |
| C:0.0541        |        |       |                   |
| G:0.2124        |        |       |                   |
| G:0.4454        |        |       |                   |
| G:0.1052        |        |       |                   |
| C:0.5576        |        |       |                   |
| A:0.3384        |        | 0,1   |                   |
| C:0.0056        |        |       |                   |
| GC:0.005        |        |       |                   |
| C:0.4835        |        |       |                   |
| G:0.2551        |        |       |                   |
| G:0.1687        |        | 0,1   |                   |
| A:0.2748        |        |       |                   |
| G:0.9145        |        |       |                   |
| A:0.3588        |        |       |                   |
| G:0.3587        |        |       |                   |
| G:0.1945        |        | 0,1   |                   |
| A:0.3652        | benign |       | 25541970,21348951 |
| A:0.7913        |        |       |                   |
| C:0.2937        |        |       |                   |
| -.0.7161        | benign |       |                   |
| T:0.0021        |        |       |                   |
| C:0.0001        |        |       |                   |
| A:0.5145        |        |       |                   |
| G:0.4012        |        | 0,1   | 21565829,22428065 |
| -.0.4397        |        |       |                   |
| GGGGATTA:0.1858 |        | 0,1   |                   |
| G:0.163         |        |       |                   |
| C:0.5579        | benign |       |                   |
| C:0.5715        |        |       |                   |
| T:0.3393        |        |       |                   |
| C:0.5766        |        | 0,1   |                   |
| T:0.4282        |        | 0,1,1 |                   |
| T:0.0798        |        |       | 23592335          |
|                 |        | 1     |                   |

VEP annotated somatic variants

|                                                                                             |                                               |                            |                                                                      |
|---------------------------------------------------------------------------------------------|-----------------------------------------------|----------------------------|----------------------------------------------------------------------|
| -:0.3277                                                                                    |                                               |                            |                                                                      |
| A:0.4972<br>T:0.5299                                                                        |                                               | 0,0,1                      | 0,18971541,25481646,22                                               |
| G:0.4001<br>T:0.0067                                                                        |                                               |                            |                                                                      |
| T:0.3698                                                                                    |                                               |                            |                                                                      |
| C:0.218                                                                                     |                                               |                            |                                                                      |
| T:0.4958<br>T:0.7657                                                                        |                                               | 0,1<br>0,1                 | 18389087                                                             |
| T:0.3228<br>A:0.5865<br>A:0.6031<br>G:0.2501<br>C:0.1878<br>C:0.8017<br>T:0.361<br>C:0.0859 |                                               | 0,1<br>0,1<br>0,1<br>0,1,1 | 16385451<br>24934404,24942080                                        |
| A:0.649<br>T:0.3544,T:0.3544<br>A:0.1262,A:0.1262<br>T:0.0016                               | not_provided,benign<br>not_provided<br>benign | 0,0,1                      | 20145122,20558521,22265947,18<br>13,19513315,17033962,19<br>16917943 |
| A:0.5597<br>T:0.4598                                                                        | benign                                        |                            | 24978818                                                             |
| G:0.5424<br>A:0.5483                                                                        |                                               |                            | 24587951,21072201                                                    |
| T:0.262                                                                                     |                                               | 0,1                        | 141583,21812969,235988                                               |
| G:0.4157                                                                                    |                                               | 0,1,1                      | 25374748,25374745                                                    |
| A:0.3666<br>C:0.8928                                                                        |                                               |                            |                                                                      |
| G:0.8714                                                                                    | benign                                        |                            | 7,25392755,22348792,22058430,22007172,224738                         |

VEP annotated somatic variants

T:0.865

G:0.1177 benign 0,1 25358694  
 A:0.3016 04,20015893,23453696,21

G:0.2197 0,1 16385451  
 T:0.2207

C:0.0481 0,1  
 G:0.1058

C:0.5748  
 G:0.5709

C:0.2348 24528284,18854866

C:0.1197 0,1  
 A:0.0048

C:0.4417  
 C:0.5015

A:0.2212  
 C:0.2235 0,1

T:0.1049  
 T:0.5747 0,1 21204206,17476318

T:0.1366

C:0.2007 0,1

G:0.2103 benign 0,1 23978482,18710470  
 C:0.3704  
 T:0.1676  
 A:0.1821  
 C:0.366 not\_provided,benign 0,1,1

C:0.7327

T:0.0166

VEP annotated somatic variants

|                                                                                |                              |       |                   |
|--------------------------------------------------------------------------------|------------------------------|-------|-------------------|
| A:0.4406                                                                       |                              |       | 22544659          |
| A:0.7814                                                                       |                              |       |                   |
| G:0.0987                                                                       |                              |       |                   |
| A:0.2484                                                                       |                              |       | 19491853          |
| G:0.2523                                                                       |                              |       |                   |
| T:0.2129                                                                       |                              |       |                   |
| 19141529,19199283,19541292,20031642,20395645,23149035,15993855,17123473,166167 |                              |       |                   |
| A:0.0628                                                                       |                              |       | 16604304,16841561 |
| T:0.4884                                                                       |                              |       |                   |
| A:0.0672                                                                       |                              | 0,1   |                   |
| G:0.4458                                                                       |                              | 0,1   |                   |
| A:0.2515                                                                       |                              | 0,1,1 |                   |
| T:0.0023                                                                       |                              |       |                   |
| A:0.3963                                                                       |                              |       |                   |
| G:0.5633                                                                       |                              |       |                   |
| A:0.0569                                                                       |                              |       |                   |
| T:0.1183                                                                       |                              |       |                   |
| C:0.0344                                                                       |                              | 0,1   | 19185281          |
| T:0.0514                                                                       |                              | 0,1,1 |                   |
| G:0.0086                                                                       | ncertain_significance,benign |       |                   |
| T:0.1438                                                                       |                              |       |                   |
| T:0.301                                                                        |                              |       |                   |
| C:0.3301                                                                       |                              |       |                   |
| T:0.0243                                                                       |                              |       |                   |
| G:0.7817                                                                       |                              |       |                   |
| C:0.2963                                                                       |                              |       |                   |
| T:0.2667                                                                       |                              | 0,1   |                   |

VEP annotated somatic variants

|                                                                     |               |                            |                                   |
|---------------------------------------------------------------------|---------------|----------------------------|-----------------------------------|
| G:0.1603<br>C:0.634<br>A:0.566                                      |               |                            |                                   |
| G:0.1771                                                            |               |                            |                                   |
| C:0.589                                                             |               |                            | 18778477                          |
| C:0.3155                                                            | risk_factor   | 0,1<br>0,0,1               | 19,16380915,18657476,18           |
| T:0.3517<br>G:0.1851                                                |               |                            |                                   |
| C:0.072<br>C:0.0452<br>T:0.1057<br>T:0.1511<br>C:0.2594<br>A:0.1057 | benign        | 0,1<br><br><br><br>0,1,1,1 |                                   |
| A:0.2477<br>C:0.3609                                                |               | 0,1                        |                                   |
| A:0.0229                                                            |               |                            |                                   |
| C:0.4559<br>A:0.403                                                 |               |                            |                                   |
| T:0.0064<br>T:0.2672<br>C:0.4008                                    | likely_benign |                            |                                   |
| A:0.105<br>C:0.1855                                                 |               | 0,1                        |                                   |
| T:0.3542                                                            |               | 0,1                        |                                   |
| G:0.2976                                                            |               |                            | 19285750,21116649,22363464,178489 |
| C:0.0341<br>A:0.3703<br>T:0.4964<br>T:0.0071<br>A:0.187             |               | 0,1<br>0,1<br>0,1          | 15110318,18980857<br><br>20927379 |



VEP annotated somatic variants

|          |         |                        |
|----------|---------|------------------------|
| A:0.6819 | 0,1     |                        |
| G:0.3279 |         |                        |
| A:0.2512 |         |                        |
| C:0.4172 |         | 19880490               |
| A:0.0181 |         |                        |
| A:0.24   | 0,1     | 424379,19543401,235204 |
| C:0.0029 |         |                        |
| T:0.4702 | 0,1,1   |                        |
| G:0.0449 | 0,1     |                        |
| A:0.14   |         |                        |
| :-0.0265 |         |                        |
| G:0.0381 |         |                        |
| A:0.5084 |         |                        |
| C:0.1986 |         |                        |
| C:0.2794 |         |                        |
| G:0.0027 |         |                        |
| T:0.1878 |         |                        |
| C:0.6415 |         | 24798189               |
| T:0.4059 | 0,1     |                        |
| G:0.2899 | 0,1,1,1 |                        |
| A:0.2494 |         |                        |
| T:0.2455 | 0,1     |                        |
| C:0.3029 | 0,0,1   | 346866,21212151,248205 |
| G:0.3036 | 0,0,1   | 7,15987456,16741161,20 |
| G:0.1901 |         |                        |
| T:0.2812 |         |                        |
| C:0.606  | 0,1     |                        |
| T:0.0811 |         |                        |
| C:0.2606 |         |                        |
| T:0.0793 |         |                        |
| C:0.3117 |         |                        |
| A:0.2219 |         |                        |
| T:0.0405 |         |                        |
| G:0.0165 | 0,1,1   |                        |
| T:0.7434 |         |                        |

VEP annotated somatic variants

|          |                     |       |                        |
|----------|---------------------|-------|------------------------|
| C:0.3381 |                     | 0,1   |                        |
| T:0.0012 |                     |       |                        |
| C:0.0087 |                     |       |                        |
| C:0.2059 |                     |       |                        |
| T:0.2027 |                     |       |                        |
| A:0.1194 |                     |       |                        |
| G:0.3976 |                     |       |                        |
| G:0.1378 | not_provided,benign | 0,1   | 042,93284,10363127,206 |
| A:0.132  | not_provided        |       | 16981987,10533067      |
| T:0.1707 |                     | 0,1   |                        |
| A:0.1818 |                     |       |                        |
| C:0.2037 |                     |       |                        |
| C:0.317  |                     | 0,1   | 20096481               |
| T:0.0013 |                     |       |                        |
| C:0.3769 |                     |       |                        |
|          |                     | 0,1,1 |                        |
| C:0.3956 |                     |       |                        |
| T:0.2966 |                     | 0,1   | 16400609               |
| G:0.1373 |                     |       |                        |
| G:0.0996 |                     |       |                        |
| G:0.5824 |                     |       |                        |
| C:0.3528 |                     | 0,1   |                        |
| C:0.1951 |                     |       |                        |
| A:0.2481 |                     |       |                        |
| T:0.2184 |                     |       |                        |
| G:0.8242 |                     |       | 20011102               |
| A:0.3517 |                     | 0,1,1 |                        |
| T:0.6362 |                     |       |                        |
| G:0.0009 |                     |       |                        |
| A:0.0094 | not_provided        |       |                        |
| T:0.0303 | benign              |       | 18273898               |
| C:0.603  |                     | 0,1   |                        |

VEP annotated somatic variants

T:0.6707

G:0.0008  
T:0.0403

0,1

G:0.3776  
A:0.7423

0,1

16385451

A:0.3356  
T:0.3259  
A:0.6544  
T:0.5819  
G:0.5523  
A:0.015  
T:0.0007  
A:0.0123

0,1

0,1

:-0.4374

0,1

A:0.1079  
G:0.4559  
C:0.2267  
G:0.1527  
T:0.1735

benign

0,1,1

0,1

16385451

T:0.0535

A:0.0073

A:0.015  
C:0.3856  
C:0.4286

0,1

0,1

76,22579466,20061190,23  
18936436,19029194,216229

G:0.2397

0,1

T:0.6369  
G:0.0141  
G:0.1384  
G:0.4974  
A:0.115  
T:0.1313

0,1

VEP annotated somatic variants

|             |               |       |          |
|-------------|---------------|-------|----------|
| A:0.5801    |               | 0,1   | 20158892 |
| C:0.0655    |               |       |          |
| C:0.3693    |               |       |          |
| G:0.1058    |               |       |          |
| A:0.1003    |               |       |          |
| T:0.5039    |               | 0,1,1 |          |
| C:0.028     |               | 0,1   | 18682748 |
| G:0.49      |               |       |          |
| G:0.3045    |               | 0,1   |          |
| G:0.395     |               |       |          |
| C:0.52      |               |       |          |
| C:0.1154    |               |       |          |
| A:0.2195    | likely_benign | 0,1   |          |
| T:0.1621    |               |       |          |
| A:0.2707    |               | 0,1   |          |
| AAGT:0.7549 |               |       |          |
| T:0.3511    |               | 0,1,1 |          |
| A:0.4852    |               | 0,1,1 |          |
| C:0.5216    |               | 0,1   |          |
| T:0.4238    |               |       | 21810217 |
| C:0.0119    |               |       |          |
| T:0.3563    |               | 0,1   |          |
| T:0.3201    |               | 0,1   |          |
| T:0.8205    |               |       |          |
| C:0.2531    |               |       |          |
| T:0.3976    |               |       |          |

VEP annotated somatic variants

| MOTIF_NAME | MOTIF_POS | HIGH_INF_POS | MOTIF_SCORE_CHANGE |
|------------|-----------|--------------|--------------------|
|------------|-----------|--------------|--------------------|

3716087,21935354,21688035,20594303,19327134

## VEP annotated somatic variants

## VEP annotated somatic variants

167,18694767

## VEP annotated somatic variants

36



VEP annotated somatic variants

0863778,23624123,23775331,25690281,22110495,21989229  
i42

0843825,23797962,25881145,24855199,23562679,23687431,23922956,24652518,18461138,171945  
i43

VEP annotated somatic variants

01

91,24980155,25477898,24172113,24407958,18213623,20587580,21714860,19157983,25252306,186

40,19605537,18983999,19693267,21423693,17994190,19699472,19900610,16848906,21462137,196

## VEP annotated somatic variants

## VEP annotated somatic variants

4069190,16466695

VEP annotated somatic variants

7363767,17548691,17686149,22928041,17885617,19017876,22655231,18191955,19111454,2569481

48,22573488,18559551,22146767

4086941

132,22591901

## VEP annotated somatic variants

97

1340057,22271411,21504591,22313031,22696188,23524567,24239227,24248544,24381107,2501284  
177,25156046,16525568,17241179,21757653

11

1447348,22018726

## VEP annotated somatic variants

3721844

VEP annotated somatic variants

7498578,18848323

4915237,22357570

144,21138591,24659834,18795173,25071582,22074419,19165391,19879291,23996192,18194558,206



VEP annotated somatic variants

'94

0112391,22123319,17540610

1708937  
1078522,20639793,21422097  
5927028,18411068

## VEP annotated somatic variants

34,23967141

## VEP annotated somatic variants

## VEP annotated somatic variants

206583,16857995,23720673,17482892,23852586,18708406,22655231,19124499,17569599,1943886

## VEP annotated somatic variants

195

VEP annotated somatic variants

144,24531328,19802338,23804528,18852197,23594525,24966605,22617559,25018854,23394097

194

4940036,24068186,24323870,17658478,18634977,25430627,23681449,19505917,25685286,227295

2216302

## VEP annotated somatic variants

VEP annotated somatic variants

189,18582870



VEP annotated somatic variants

52,22740136,24884822,22960999,22323360

4059590,19466586,22535570,25784779,22328972,19587357,20929593,25516658,17141766,200431  
74,18573313,18992148,18707223,22987045,22820754,16253648,18426866,18340007,23907334,25

## VEP annotated somatic variants

VEP annotated somatic variants

2787471,23326532,22787467

3375961  
3734047

318

370,20212137,20033988,23102778,23129781,15302875,23006801

VEP annotated somatic variants

1203404

## VEP annotated somatic variants

'19,17964050,15995945,15361494,17629953,19020798,19032574

VEP annotated somatic variants

3466472,18466513,18560894,19956095,19122825,16159953,16735488,17229939,17374705

114,23300679

## VEP annotated somatic variants

164

15,25532599,20805886,20686496,25937777,24603722  
1686496

VEP annotated somatic variants

58316



## VEP annotated somatic variants

3553206,20719408,19061777  
140

## VEP annotated somatic variants

VEP annotated somatic variants

| IMPACT   | PICK | VARIANT_CLASS | TSL |
|----------|------|---------------|-----|
| MODIFIER | 1    | insertion     |     |
| MODIFIER | 1    | SNV           |     |
| MODIFIER | 1    | SNV           |     |
| LOW      | 1    | SNV           |     |
| MODIFIER | 1    | SNV           |     |
| MODIFIER | 1    | SNV           |     |
| MODIFIER | 1    | SNV           |     |
| MODIFIER | 1    | SNV           |     |
| LOW      | 1    | SNV           |     |
| MODIFIER | 1    | deletion      |     |
| LOW      | 1    | SNV           |     |
| MODIFIER | 1    | insertion     |     |
| LOW      | 1    | SNV           |     |
| MODIFIER |      | SNV           |     |
| MODERATE | 1    | SNV           |     |
| MODIFIER | 1    | SNV           |     |
| MODIFIER | 1    | SNV           |     |
| MODIFIER | 1    | SNV           |     |
| MODIFIER | 1    | SNV           |     |
| MODIFIER | 1    | SNV           |     |
| MODIFIER | 1    | SNV           |     |
| LOW      | 1    | SNV           |     |
| MODIFIER | 1    | SNV           |     |
| MODIFIER | 1    | SNV           |     |
| MODIFIER | 1    | SNV           |     |
| LOW      | 1    | SNV           |     |
| MODERATE | 1    | SNV           |     |
| MODIFIER | 1    | insertion     |     |
| MODERATE | 1    | SNV           |     |
| MODIFIER | 1    | SNV           |     |
| MODIFIER | 1    | deletion      |     |
| MODIFIER | 1    | SNV           |     |
| MODIFIER | 1    | SNV           |     |
| MODIFIER | 1    | SNV           |     |
| MODIFIER | 1    | deletion      |     |
| MODIFIER | 1    | SNV           |     |
| LOW      | 1    | SNV           |     |
| MODIFIER | 1    | SNV           |     |
| MODIFIER | 1    | SNV           |     |
| MODIFIER | 1    | insertion     |     |
| MODIFIER | 1    | SNV           |     |
| LOW      | 1    | SNV           |     |
| MODIFIER | 1    | SNV           |     |
| MODIFIER | 1    | SNV           |     |
| LOW      | 1    | SNV           |     |
| MODIFIER | 1    | SNV           |     |
| MODIFIER | 1    | SNV           |     |
| MODERATE | 1    | SNV           |     |
| LOW      | 1    | SNV           |     |
| MODIFIER | 1    | SNV           |     |
| LOW      | 1    | SNV           |     |
| MODIFIER | 1    | SNV           |     |
| MODIFIER | 1    | SNV           |     |
| MODIFIER | 1    | SNV           |     |
| MODIFIER | 1    | SNV           |     |

VEP annotated somatic variants

|          |   |          |
|----------|---|----------|
| MODIFIER | 1 | SNV      |
| MODIFIER | 1 | SNV      |
| MODIFIER | 1 | SNV      |
| MODIFIER | 1 | SNV      |
| MODIFIER | 1 | SNV      |
| MODIFIER | 1 | SNV      |
| MODIFIER | 1 | SNV      |
| LOW      | 1 | SNV      |
| MODIFIER | 1 | SNV      |
| MODIFIER | 1 | deletion |
| MODIFIER | 1 | SNV      |
| MODIFIER | 1 | SNV      |
| MODERATE | 1 | SNV      |
| MODIFIER | 1 | SNV      |
| LOW      | 1 | SNV      |
| LOW      | 1 | SNV      |
| MODIFIER | 1 | SNV      |
| MODIFIER | 1 | SNV      |
| MODIFIER | 1 | SNV      |
| MODIFIER | 1 | SNV      |
| MODIFIER | 1 | SNV      |
| MODIFIER | 1 | SNV      |
| MODIFIER | 1 | SNV      |
| MODERATE | 1 | SNV      |
| MODIFIER | 1 | SNV      |
| MODIFIER | 1 | SNV      |
| MODERATE | 1 | SNV      |
| MODIFIER | 1 | SNV      |
| MODIFIER | 1 | SNV      |
| MODERATE | 1 | SNV      |
| MODIFIER | 1 | deletion |
| MODERATE | 1 | SNV      |
| MODIFIER |   | SNV      |
| MODIFIER | 1 | SNV      |
| LOW      | 1 | SNV      |
| MODIFIER | 1 | SNV      |
| MODIFIER | 1 | SNV      |
| MODIFIER | 1 | SNV      |
| MODERATE | 1 | SNV      |
| LOW      | 1 | SNV      |
| MODIFIER | 1 | SNV      |
| LOW      | 1 | SNV      |
| MODIFIER | 1 | SNV      |
| MODIFIER | 1 | SNV      |
| MODERATE | 1 | SNV      |
| MODIFIER | 1 | SNV      |
| LOW      | 1 | SNV      |
| MODIFIER | 1 | SNV      |
| MODIFIER | 1 | SNV      |
| LOW      | 1 | SNV      |
| MODERATE | 1 | SNV      |
| MODIFIER | 1 | SNV      |
| MODIFIER | 1 | SNV      |
| MODIFIER | 1 | SNV      |
| MODIFIER | 1 | deletion |

VEP annotated somatic variants

|          |   |           |
|----------|---|-----------|
| MODIFIER | 1 | SNV       |
| MODIFIER | 1 | SNV       |
| MODIFIER | 1 | SNV       |
| MODIFIER | 1 | SNV       |
| MODIFIER | 1 | SNV       |
| MODIFIER | 1 | SNV       |
| MODIFIER | 1 | SNV       |
| MODIFIER | 1 | SNV       |
| MODIFIER | 1 | SNV       |
| MODIFIER | 1 | SNV       |
| MODIFIER | 1 | SNV       |
| LOW      | 1 | SNV       |
| LOW      | 1 | SNV       |
| MODIFIER | 1 | SNV       |
| MODIFIER | 1 | SNV       |
| MODIFIER | 1 | SNV       |
| MODIFIER | 1 | SNV       |
| MODIFIER | 1 | SNV       |
| MODIFIER | 1 | SNV       |
| MODIFIER | 1 | SNV       |
| MODIFIER | 1 | SNV       |
| MODIFIER | 1 | SNV       |
| MODIFIER | 1 | SNV       |
| LOW      | 1 | SNV       |
| MODERATE | 1 | SNV       |
| MODIFIER | 1 | insertion |
| MODERATE | 1 | SNV       |
| MODIFIER | 1 | SNV       |
| MODIFIER | 1 | SNV       |
| MODERATE | 1 | SNV       |
| MODIFIER | 1 | SNV       |
| MODIFIER | 1 | SNV       |
| MODIFIER | 1 | SNV       |
| MODIFIER | 1 | SNV       |
| HIGH     | 1 | SNV       |
| MODIFIER | 1 | SNV       |
| MODERATE | 1 | SNV       |
| MODIFIER | 1 | SNV       |
| MODIFIER | 1 | SNV       |
| MODIFIER | 1 | SNV       |
| MODIFIER | 1 | SNV       |
| MODIFIER | 1 | SNV       |
| MODIFIER | 1 | SNV       |
| MODIFIER | 1 | SNV       |
| LOW      | 1 | SNV       |
| MODIFIER | 1 | SNV       |
| MODIFIER | 1 | SNV       |
| MODIFIER | 1 | SNV       |
| MODIFIER | 1 | SNV       |
| MODERATE | 1 | SNV       |
| MODIFIER | 1 | SNV       |
| MODIFIER | 1 | SNV       |
| LOW      | 1 | SNV       |
| MODIFIER | 1 | SNV       |

VEP annotated somatic variants

|          |   |           |
|----------|---|-----------|
| MODIFIER | 1 | insertion |
| LOW      | 1 | SNV       |
| MODIFIER | 1 | SNV       |
| MODIFIER | 1 | SNV       |
| MODERATE | 1 | SNV       |
| MODIFIER | 1 | SNV       |
| HIGH     | 1 | deletion  |
| MODIFIER | 1 | deletion  |
| MODIFIER |   | SNV       |
| MODIFIER | 1 | SNV       |
| MODERATE | 1 | SNV       |
| MODIFIER | 1 | SNV       |
| MODERATE | 1 | SNV       |
| LOW      | 1 | SNV       |
| MODIFIER | 1 | deletion  |
| MODIFIER | 1 | SNV       |
| LOW      | 1 | SNV       |
| MODIFIER | 1 | SNV       |
| MODIFIER | 1 | SNV       |
| MODIFIER | 1 | SNV       |
| MODIFIER | 1 | SNV       |
| MODIFIER | 1 | SNV       |
| MODIFIER | 1 | SNV       |
| MODIFIER | 1 | SNV       |
| MODIFIER | 1 | SNV       |
| MODIFIER | 1 | SNV       |
| LOW      | 1 | SNV       |
| MODERATE | 1 | SNV       |
| MODIFIER | 1 | deletion  |
| LOW      | 1 | SNV       |
| MODIFIER | 1 | SNV       |
| MODIFIER | 1 | SNV       |
| MODIFIER | 1 | SNV       |
| MODIFIER | 1 | SNV       |
| MODIFIER | 1 | SNV       |
| MODIFIER | 1 | SNV       |
| MODIFIER | 1 | SNV       |
| MODIFIER | 1 | SNV       |
| MODIFIER | 1 | SNV       |
| MODIFIER | 1 | SNV       |
| MODIFIER | 1 | SNV       |
| MODIFIER | 1 | SNV       |
| MODIFIER | 1 | SNV       |
| MODIFIER | 1 | SNV       |
| MODIFIER | 1 | SNV       |
| MODIFIER | 1 | SNV       |
| MODIFIER | 1 | SNV       |
| MODIFIER | 1 | SNV       |
| LOW      | 1 | SNV       |
| LOW      | 1 | SNV       |
| MODIFIER | 1 | deletion  |
| MODERATE | 1 | SNV       |

VEP annotated somatic variants

|          |   |           |
|----------|---|-----------|
| MODIFIER | 1 | SNV       |
| MODIFIER | 1 | SNV       |
| MODIFIER | 1 | SNV       |
| MODIFIER | 1 | SNV       |
| LOW      | 1 | SNV       |
| MODERATE | 1 | SNV       |
| MODIFIER | 1 | SNV       |
| MODIFIER | 1 | SNV       |
| LOW      | 1 | SNV       |
| MODIFIER | 1 | SNV       |
| MODIFIER | 1 | SNV       |
| MODIFIER | 1 | SNV       |
| MODIFIER | 1 | SNV       |
| MODERATE | 1 | SNV       |
| HIGH     | 1 | deletion  |
| MODIFIER | 1 | SNV       |
| MODIFIER | 1 | deletion  |
| MODERATE | 1 | SNV       |
| MODIFIER | 1 | SNV       |
| MODERATE | 1 | deletion  |
| MODIFIER | 1 | SNV       |
| MODIFIER | 1 | SNV       |
| MODIFIER | 1 | SNV       |
| MODERATE | 1 | SNV       |
| MODIFIER | 1 | SNV       |
| MODIFIER | 1 | SNV       |
| MODIFIER | 1 | SNV       |
| MODIFIER | 1 | SNV       |
| MODIFIER | 1 | SNV       |
| LOW      | 1 | SNV       |
| MODIFIER | 1 | SNV       |
| MODIFIER | 1 | SNV       |
| MODIFIER | 1 | SNV       |
| MODIFIER | 1 | SNV       |
| MODIFIER | 1 | SNV       |
| MODIFIER | 1 | SNV       |
| MODIFIER | 1 | SNV       |
| MODIFIER | 1 | SNV       |
| MODIFIER | 1 | insertion |
| MODIFIER | 1 | SNV       |
| MODIFIER | 1 | SNV       |
| MODERATE | 1 | SNV       |
| MODIFIER | 1 | SNV       |
| LOW      | 1 | SNV       |
| MODIFIER | 1 | deletion  |
| MODERATE | 1 | SNV       |
| MODIFIER | 1 | SNV       |
| MODIFIER | 1 | SNV       |
| MODIFIER | 1 | SNV       |
| MODIFIER | 1 | SNV       |
| MODERATE | 1 | SNV       |
| MODIFIER | 1 | SNV       |
| MODIFIER | 1 | SNV       |
| MODIFIER | 1 | SNV       |
| MODERATE | 1 | SNV       |
| LOW      | 1 | SNV       |
| MODIFIER | 1 | SNV       |
| LOW      | 1 | SNV       |
| MODIFIER | 1 | SNV       |

VEP annotated somatic variants

|          |   |           |
|----------|---|-----------|
| MODIFIER | 1 | SNV       |
| MODERATE | 1 | SNV       |
| MODIFIER | 1 | SNV       |
| MODIFIER | 1 | SNV       |
| MODIFIER | 1 | SNV       |
| LOW      | 1 | SNV       |
| MODIFIER | 1 | SNV       |
| MODERATE | 1 | SNV       |
| MODIFIER | 1 | SNV       |
| MODIFIER | 1 | SNV       |
| MODIFIER | 1 | SNV       |
| MODIFIER | 1 | SNV       |
| MODIFIER | 1 | SNV       |
| MODIFIER | 1 | SNV       |
| HIGH     | 1 | SNV       |
| MODIFIER | 1 | SNV       |
| MODIFIER | 1 | SNV       |
| MODIFIER | 1 | SNV       |
| MODIFIER | 1 | SNV       |
| LOW      | 1 | SNV       |
| MODIFIER | 1 | SNV       |
| LOW      | 1 | SNV       |
| MODIFIER | 1 | SNV       |
| MODIFIER | 1 | SNV       |
| LOW      | 1 | SNV       |
| MODIFIER | 1 | SNV       |
| LOW      | 1 | SNV       |
| MODIFIER | 1 | SNV       |
| MODIFIER | 1 | SNV       |
| MODIFIER | 1 | insertion |
| MODIFIER | 1 | SNV       |
| MODIFIER | 1 | SNV       |
| MODIFIER | 1 | SNV       |
| MODERATE | 1 | SNV       |
| MODIFIER | 1 | SNV       |
| MODIFIER | 1 | SNV       |
| MODIFIER | 1 | SNV       |
| MODIFIER | 1 | deletion  |
| LOW      | 1 | SNV       |
| MODIFIER | 1 | SNV       |
| MODIFIER | 1 | SNV       |
| MODIFIER | 1 | SNV       |
| MODIFIER | 1 | SNV       |
| MODERATE | 1 | SNV       |
| MODIFIER | 1 | SNV       |
| MODIFIER | 1 | SNV       |
| MODIFIER | 1 | SNV       |
| MODIFIER | 1 | SNV       |
| LOW      | 1 | SNV       |
| MODIFIER | 1 | insertion |
| MODIFIER | 1 | SNV       |
| MODIFIER | 1 | SNV       |
| MODIFIER | 1 | SNV       |
| MODIFIER | 1 | SNV       |
| MODIFIER | 1 | SNV       |



VEP annotated somatic variants

|          |   |           |
|----------|---|-----------|
| LOW      | 1 | SNV       |
| MODIFIER | 1 | SNV       |
| LOW      | 1 | SNV       |
| MODIFIER | 1 | SNV       |
| LOW      | 1 | SNV       |
| LOW      | 1 | SNV       |
| MODIFIER | 1 | SNV       |
| MODERATE | 1 | SNV       |
| MODIFIER | 1 | SNV       |
| MODERATE | 1 | SNV       |
| MODIFIER | 1 | SNV       |
| LOW      | 1 | SNV       |
| MODERATE | 1 | SNV       |
| MODIFIER | 1 | SNV       |
| MODIFIER | 1 | SNV       |
| MODIFIER | 1 | SNV       |
| MODIFIER | 1 | SNV       |
| MODIFIER | 1 | SNV       |
| MODIFIER | 1 | SNV       |
| MODIFIER | 1 | deletion  |
| MODERATE | 1 | SNV       |
| MODIFIER | 1 | SNV       |
| LOW      | 1 | SNV       |
| MODIFIER | 1 | SNV       |
| MODIFIER | 1 | SNV       |
| MODIFIER | 1 | SNV       |
| LOW      | 1 | SNV       |
| MODIFIER | 1 | SNV       |
| MODIFIER | 1 | SNV       |
| LOW      | 1 | SNV       |
| MODIFIER | 1 | SNV       |
| LOW      | 1 | SNV       |
| MODIFIER | 1 | SNV       |
| MODIFIER | 1 | SNV       |
| MODIFIER | 1 | SNV       |
| MODIFIER | 1 | SNV       |
| MODIFIER | 1 | SNV       |
| MODERATE | 1 | SNV       |
| MODIFIER | 1 | SNV       |
| MODIFIER | 1 | SNV       |
| MODIFIER | 1 | SNV       |
| MODIFIER | 1 | SNV       |
| MODIFIER | 1 | SNV       |
| MODIFIER | 1 | SNV       |
| MODIFIER | 1 | insertion |
| MODIFIER | 1 | SNV       |
| MODIFIER | 1 | SNV       |
| MODIFIER | 1 | SNV       |
| MODIFIER | 1 | SNV       |
| MODIFIER | 1 | SNV       |
| MODIFIER | 1 | SNV       |
| MODIFIER | 1 | SNV       |
| MODIFIER | 1 | deletion  |
| MODIFIER | 1 | SNV       |
| MODIFIER | 1 | SNV       |
| MODIFIER | 1 | SNV       |
| MODIFIER | 1 | SNV       |
| MODIFIER | 1 | SNV       |
| MODIFIER | 1 | SNV       |
| MODIFIER | 1 | SNV       |
| MODIFIER | 1 | SNV       |

VEP annotated somatic variants

|          |   |           |
|----------|---|-----------|
| MODIFIER | 1 | SNV       |
| MODIFIER | 1 | SNV       |
| MODIFIER | 1 | SNV       |
| MODIFIER | 1 | SNV       |
| MODIFIER | 1 | SNV       |
| MODIFIER | 1 | SNV       |
| MODIFIER | 1 | SNV       |
| MODIFIER | 1 | SNV       |
| MODIFIER | 1 | SNV       |
| MODIFIER | 1 | SNV       |
| MODIFIER | 1 | SNV       |
| MODIFIER | 1 | SNV       |
| LOW      | 1 | SNV       |
| MODIFIER | 1 | SNV       |
| MODIFIER | 1 | deletion  |
| MODIFIER | 1 | SNV       |
| MODIFIER | 1 | SNV       |
| LOW      | 1 | SNV       |
| MODERATE | 1 | SNV       |
| MODIFIER | 1 | SNV       |
| MODIFIER | 1 | SNV       |
| LOW      | 1 | SNV       |
| LOW      | 1 | SNV       |
| MODIFIER | 1 | SNV       |
| MODIFIER | 1 | SNV       |
| MODIFIER | 1 | SNV       |
| MODIFIER | 1 | SNV       |
| MODIFIER | 1 | deletion  |
| LOW      | 1 | SNV       |
| LOW      | 1 | SNV       |
| MODIFIER | 1 | SNV       |
| MODIFIER | 1 | SNV       |
| MODIFIER | 1 | SNV       |
| MODIFIER | 1 | SNV       |
| MODIFIER | 1 | SNV       |
| MODIFIER | 1 | SNV       |
| LOW      | 1 | SNV       |
| MODIFIER | 1 | SNV       |
| MODERATE | 1 | SNV       |
| MODIFIER | 1 | SNV       |
| MODIFIER | 1 | SNV       |
| MODIFIER | 1 | SNV       |
| MODERATE | 1 | SNV       |
| MODERATE | 1 | SNV       |
| MODIFIER | 1 | SNV       |
| MODIFIER | 1 | SNV       |
| MODIFIER | 1 | SNV       |
| MODIFIER | 1 | SNV       |
| MODIFIER | 1 | SNV       |
| MODIFIER | 1 | SNV       |
| MODIFIER | 1 | SNV       |
| MODIFIER | 1 | SNV       |
| MODIFIER | 1 | SNV       |
| MODIFIER | 1 | SNV       |
| MODIFIER | 1 | SNV       |
| MODIFIER | 1 | SNV       |
| MODIFIER | 1 | SNV       |
| MODIFIER | 1 | insertion |
| MODIFIER | 1 | SNV       |
| MODIFIER | 1 | deletion  |
| MODIFIER | 1 | SNV       |

VEP annotated somatic variants

|          |   |           |
|----------|---|-----------|
| LOW      | 1 | SNV       |
| MODIFIER | 1 | SNV       |
| MODIFIER | 1 | SNV       |
| LOW      | 1 | SNV       |
| LOW      | 1 | SNV       |
| LOW      | 1 | SNV       |
| LOW      | 1 | SNV       |
| LOW      | 1 | SNV       |
| MODIFIER | 1 | SNV       |
| LOW      | 1 | SNV       |
| MODERATE | 1 | SNV       |
| MODIFIER | 1 | SNV       |
| MODIFIER | 1 | SNV       |
| MODERATE | 1 | SNV       |
| MODIFIER | 1 | SNV       |
| MODIFIER | 1 | SNV       |
| LOW      | 1 | SNV       |
| MODIFIER | 1 | SNV       |
| MODIFIER | 1 | SNV       |
| MODIFIER | 1 | SNV       |
| MODIFIER | 1 | SNV       |
| MODIFIER | 1 | SNV       |
| MODERATE | 1 | SNV       |
| LOW      | 1 | SNV       |
| MODIFIER | 1 | SNV       |
| MODIFIER | 1 | SNV       |
| MODERATE | 1 | SNV       |
| MODERATE | 1 | SNV       |
| MODERATE | 1 | SNV       |
| LOW      | 1 | SNV       |
| MODIFIER | 1 | SNV       |
| MODIFIER | 1 | SNV       |
| MODIFIER | 1 | SNV       |
| MODIFIER | 1 | SNV       |
| LOW      | 1 | SNV       |
| MODIFIER | 1 | SNV       |
| MODERATE | 1 | SNV       |
| MODIFIER | 1 | SNV       |
| MODIFIER | 1 | SNV       |
| MODERATE | 1 | SNV       |
| MODIFIER | 1 | SNV       |
| MODIFIER | 1 | SNV       |
| MODIFIER | 1 | SNV       |
| MODIFIER | 1 | SNV       |
| MODERATE | 1 | SNV       |
| MODIFIER | 1 | insertion |
| MODIFIER | 1 | insertion |
| MODIFIER | 1 | SNV       |
| MODIFIER | 1 | SNV       |
| MODIFIER | 1 | SNV       |
| LOW      | 1 | SNV       |
| MODIFIER | 1 | SNV       |

VEP annotated somatic variants

|          |   |           |
|----------|---|-----------|
| MODIFIER | 1 | SNV       |
| MODIFIER | 1 | SNV       |
| MODIFIER | 1 | SNV       |
| MODIFIER | 1 | SNV       |
| MODIFIER | 1 | SNV       |
| MODIFIER | 1 | SNV       |
| MODIFIER | 1 | SNV       |
| LOW      | 1 | SNV       |
| MODERATE | 1 | SNV       |
| MODIFIER | 1 | SNV       |
| MODIFIER | 1 | SNV       |
| MODIFIER | 1 | SNV       |
| LOW      | 1 | SNV       |
| MODIFIER | 1 | SNV       |
| MODIFIER | 1 | SNV       |
| MODIFIER | 1 | SNV       |
| LOW      | 1 | SNV       |
| MODIFIER | 1 | SNV       |
| MODIFIER | 1 | SNV       |
| MODIFIER | 1 | SNV       |
| MODERATE | 1 | SNV       |
| MODERATE | 1 | SNV       |
| MODIFIER | 1 | SNV       |
| MODIFIER | 1 | SNV       |
| MODIFIER | 1 | SNV       |
| MODIFIER | 1 | SNV       |
| MODIFIER | 1 | SNV       |
| MODIFIER | 1 | SNV       |
| MODIFIER | 1 | SNV       |
| MODIFIER | 1 | SNV       |
| LOW      | 1 | SNV       |
| MODERATE | 1 | SNV       |
| MODIFIER | 1 | SNV       |
| MODIFIER | 1 | SNV       |
| LOW      | 1 | SNV       |
| MODIFIER | 1 | SNV       |
| MODIFIER | 1 | SNV       |
| MODIFIER | 1 | insertion |
| LOW      | 1 | SNV       |
| MODIFIER | 1 | SNV       |
| MODERATE | 1 | SNV       |
| MODIFIER | 1 | SNV       |
| MODIFIER | 1 | insertion |
| MODIFIER | 1 | SNV       |
| MODIFIER | 1 | SNV       |
| LOW      | 1 | SNV       |
| MODERATE | 1 | deletion  |
| MODIFIER | 1 | SNV       |
| MODIFIER | 1 | SNV       |
| LOW      | 1 | SNV       |
| LOW      | 1 | SNV       |
| MODIFIER | 1 | SNV       |
| MODIFIER | 1 | SNV       |
| LOW      | 1 | SNV       |
| MODIFIER | 1 | SNV       |

VEP annotated somatic variants

|          |   |           |
|----------|---|-----------|
| LOW      | 1 | SNV       |
| MODIFIER | 1 | SNV       |
| MODIFIER | 1 | SNV       |
| LOW      | 1 | SNV       |
| MODIFIER | 1 | SNV       |
| MODIFIER | 1 | SNV       |
| MODIFIER | 1 | SNV       |
| LOW      | 1 | SNV       |
| MODIFIER | 1 | SNV       |
| LOW      | 1 | SNV       |
| MODIFIER | 1 | SNV       |
| MODIFIER | 1 | SNV       |
| MODIFIER | 1 | SNV       |
| MODIFIER | 1 | SNV       |
| MODIFIER | 1 | deletion  |
| MODIFIER | 1 | SNV       |
| MODIFIER | 1 | SNV       |
| MODIFIER | 1 | SNV       |
| MODIFIER | 1 | SNV       |
| MODERATE | 1 | SNV       |
| MODERATE | 1 | SNV       |
| MODERATE | 1 | SNV       |
| LOW      | 1 | SNV       |
| MODERATE | 1 | SNV       |
| MODIFIER | 1 | insertion |
| MODIFIER | 1 | SNV       |
| MODIFIER | 1 | SNV       |
| MODIFIER | 1 | SNV       |
| LOW      | 1 | SNV       |
| LOW      | 1 | SNV       |
| MODIFIER | 1 | SNV       |
| LOW      | 1 | SNV       |
| MODIFIER | 1 | SNV       |
| MODIFIER | 1 | SNV       |
| MODIFIER | 1 | SNV       |
| MODIFIER | 1 | SNV       |
| MODIFIER | 1 | SNV       |
| MODERATE | 1 | SNV       |
| MODERATE | 1 | SNV       |
| MODERATE | 1 | SNV       |
| MODIFIER | 1 | SNV       |
| MODERATE | 1 | SNV       |
| LOW      | 1 | SNV       |
| MODIFIER | 1 | SNV       |
| MODIFIER | 1 | SNV       |
| MODIFIER | 1 | SNV       |
| MODERATE | 1 | SNV       |
| MODIFIER | 1 | SNV       |
| MODIFIER | 1 | SNV       |
| MODIFIER | 1 | SNV       |
| MODIFIER | 1 | SNV       |
| LOW      | 1 | SNV       |
| MODERATE | 1 | SNV       |
| LOW      | 1 | SNV       |
| LOW      | 1 | SNV       |



VEP annotated somatic variants

|          |   |           |
|----------|---|-----------|
| LOW      | 1 | SNV       |
| MODIFIER | 1 | deletion  |
| MODERATE | 1 | SNV       |
| MODIFIER | 1 | SNV       |
| MODIFIER | 1 | deletion  |
| LOW      | 1 | SNV       |
| MODIFIER | 1 | SNV       |
| MODERATE | 1 | SNV       |
| MODIFIER | 1 | SNV       |
| MODIFIER | 1 | SNV       |
| LOW      | 1 | SNV       |
| MODIFIER | 1 | insertion |
| LOW      | 1 | SNV       |
| LOW      | 1 | SNV       |
| LOW      | 1 | SNV       |
| LOW      | 1 | SNV       |
| MODERATE | 1 | SNV       |
| MODERATE | 1 | SNV       |
| MODIFIER | 1 | SNV       |
| MODIFIER | 1 | SNV       |
| MODIFIER | 1 | SNV       |
| MODIFIER | 1 | SNV       |
| MODERATE | 1 | SNV       |
| MODERATE | 1 | SNV       |
| MODIFIER | 1 | SNV       |
| MODIFIER | 1 | SNV       |
| LOW      | 1 | SNV       |
| MODIFIER | 1 | SNV       |
| MODIFIER | 1 | SNV       |
| LOW      | 1 | SNV       |
| LOW      | 1 | SNV       |
| MODIFIER | 1 | SNV       |
| MODIFIER | 1 | SNV       |
| MODERATE | 1 | SNV       |
| MODIFIER | 1 | SNV       |
| LOW      | 1 | SNV       |
| MODIFIER | 1 | deletion  |
| LOW      | 1 | SNV       |
| MODIFIER | 1 | deletion  |
| MODERATE | 1 | SNV       |
| MODIFIER | 1 | SNV       |
| MODIFIER | 1 | SNV       |
| MODIFIER | 1 | SNV       |
| MODIFIER | 1 | SNV       |
| MODIFIER | 1 | SNV       |
| LOW      | 1 | SNV       |
| MODIFIER | 1 | SNV       |
| MODIFIER | 1 | SNV       |
| MODIFIER | 1 | SNV       |
| MODIFIER | 1 | SNV       |
| MODIFIER | 1 | SNV       |
| MODIFIER | 1 | deletion  |
| MODIFIER | 1 | SNV       |
| MODIFIER | 1 | SNV       |
| LOW      | 1 | SNV       |

VEP annotated somatic variants

|          |   |           |
|----------|---|-----------|
| MODIFIER | 1 | SNV       |
| MODIFIER | 1 | SNV       |
| MODIFIER | 1 | SNV       |
| MODIFIER | 1 | SNV       |
| MODIFIER | 1 | SNV       |
| LOW      | 1 | SNV       |
| MODIFIER | 1 | SNV       |
| MODIFIER | 1 | SNV       |
| MODIFIER | 1 | SNV       |
| MODIFIER | 1 | SNV       |
| MODIFIER | 1 | SNV       |
| MODIFIER | 1 | insertion |
| LOW      | 1 | SNV       |
| LOW      | 1 | SNV       |
| MODIFIER | 1 | SNV       |
| MODIFIER | 1 | SNV       |
| MODIFIER | 1 | SNV       |
| MODIFIER | 1 | SNV       |
| MODIFIER | 1 | SNV       |
| MODIFIER | 1 | SNV       |
| MODIFIER | 1 | SNV       |
| MODIFIER | 1 | SNV       |
| LOW      | 1 | SNV       |
| MODIFIER | 1 | deletion  |
| MODIFIER | 1 | SNV       |
| MODIFIER | 1 | SNV       |
| LOW      | 1 | SNV       |
| LOW      | 1 | SNV       |
| LOW      | 1 | SNV       |
| MODERATE | 1 | SNV       |
| MODIFIER | 1 | SNV       |
| MODIFIER | 1 | SNV       |
| MODIFIER | 1 | SNV       |
| MODIFIER | 1 | SNV       |
| MODIFIER | 1 | SNV       |
| MODIFIER | 1 | SNV       |
| MODIFIER | 1 | SNV       |
| MODIFIER | 1 | SNV       |
| MODIFIER | 1 | SNV       |
| MODIFIER | 1 | SNV       |
| MODERATE | 1 | SNV       |
| MODIFIER | 1 | SNV       |
| LOW      | 1 | SNV       |
| MODERATE | 1 | SNV       |
| LOW      | 1 | SNV       |
| MODIFIER | 1 | SNV       |
| MODERATE | 1 | SNV       |
| MODIFIER | 1 | deletion  |
| LOW      | 1 | SNV       |
| MODIFIER | 1 | SNV       |
| MODIFIER | 1 | SNV       |
| LOW      | 1 | SNV       |
| MODIFIER | 1 | SNV       |
| MODIFIER | 1 | insertion |
| MODIFIER | 1 | SNV       |
| MODIFIER | 1 | deletion  |
| MODIFIER | 1 | SNV       |
| MODIFIER | 1 | SNV       |



VEP annotated somatic variants

|          |   |           |
|----------|---|-----------|
| LOW      | 1 | SNV       |
| LOW      | 1 | SNV       |
| MODIFIER | 1 | SNV       |
| MODIFIER | 1 | SNV       |
| MODIFIER | 1 | SNV       |
| MODIFIER | 1 | SNV       |
| LOW      | 1 | SNV       |
| LOW      | 1 | SNV       |
| MODIFIER | 1 | SNV       |
| MODIFIER | 1 | SNV       |
| MODIFIER | 1 | SNV       |
| MODIFIER | 1 | SNV       |
| MODIFIER | 1 | SNV       |
| MODIFIER | 1 | SNV       |
| MODIFIER | 1 | SNV       |
| LOW      | 1 | SNV       |
| MODIFIER | 1 | SNV       |
| MODIFIER | 1 | deletion  |
| MODIFIER | 1 | SNV       |
| MODIFIER | 1 | SNV       |
| MODIFIER | 1 | SNV       |
| MODIFIER | 1 | SNV       |
| MODIFIER | 1 | SNV       |
| MODIFIER | 1 | SNV       |
| MODIFIER | 1 | SNV       |
| LOW      | 1 | SNV       |
| MODIFIER | 1 | SNV       |
| MODIFIER | 1 | insertion |
| MODIFIER | 1 | SNV       |
| MODIFIER | 1 | SNV       |
| MODIFIER | 1 | SNV       |
| MODIFIER | 1 | SNV       |
| MODIFIER | 1 | SNV       |
| MODIFIER | 1 | SNV       |
| MODERATE | 1 | SNV       |
| MODIFIER | 1 | SNV       |
| MODIFIER | 1 | SNV       |
| MODIFIER | 1 | SNV       |
| MODIFIER | 1 | deletion  |
| LOW      | 1 | SNV       |
| MODIFIER | 1 | SNV       |
| MODIFIER | 1 | SNV       |
| MODIFIER | 1 | SNV       |
| MODIFIER | 1 | SNV       |
| MODIFIER | 1 | SNV       |
| MODIFIER | 1 | SNV       |
| MODERATE | 1 | SNV       |
| MODIFIER | 1 | SNV       |
| MODIFIER | 1 | SNV       |
| MODIFIER | 1 | SNV       |
| MODERATE | 1 | SNV       |
| MODIFIER | 1 | SNV       |
| MODIFIER | 1 | SNV       |
| MODERATE | 1 | SNV       |
| MODERATE | 1 | SNV       |
| MODIFIER | 1 | SNV       |

VEP annotated somatic variants

|          |   |           |
|----------|---|-----------|
| MODIFIER | 1 | SNV       |
| MODIFIER | 1 | SNV       |
| MODIFIER | 1 | SNV       |
| MODIFIER | 1 | SNV       |
| MODIFIER | 1 | SNV       |
| MODIFIER | 1 | SNV       |
| MODIFIER | 1 | SNV       |
| MODIFIER | 1 | SNV       |
| MODIFIER | 1 | SNV       |
| MODIFIER | 1 | SNV       |
| LOW      | 1 | SNV       |
| MODIFIER | 1 | SNV       |
| MODIFIER | 1 | SNV       |
| LOW      | 1 | SNV       |
| MODIFIER | 1 | SNV       |
| MODIFIER | 1 | SNV       |
| LOW      | 1 | SNV       |
| MODIFIER | 1 | SNV       |
| LOW      | 1 | SNV       |
| MODERATE | 1 | SNV       |
| MODERATE | 1 | SNV       |
| MODERATE | 1 | SNV       |
| MODIFIER | 1 | SNV       |
| LOW      | 1 | SNV       |
| MODIFIER | 1 | SNV       |
| MODIFIER | 1 | deletion  |
| MODIFIER | 1 | SNV       |
| LOW      | 1 | SNV       |
| MODIFIER | 1 | SNV       |
| MODERATE | 1 | SNV       |
| MODIFIER | 1 | SNV       |
| MODIFIER | 1 | SNV       |
| LOW      | 1 | SNV       |
| MODIFIER | 1 | SNV       |
| MODIFIER | 1 | SNV       |
| MODIFIER | 1 | SNV       |
| MODIFIER | 1 | SNV       |
| MODERATE | 1 | SNV       |
| MODIFIER | 1 | SNV       |
| MODIFIER | 1 | SNV       |
| MODIFIER | 1 | SNV       |
| MODIFIER | 1 | insertion |
| MODIFIER | 1 | SNV       |
| LOW      | 1 | SNV       |
| MODIFIER | 1 | SNV       |
| LOW      | 1 | SNV       |
| MODIFIER | 1 | SNV       |
| LOW      | 1 | SNV       |
| MODERATE | 1 | SNV       |
| MODIFIER | 1 | SNV       |
| MODIFIER | 1 | SNV       |
| MODIFIER | 1 | SNV       |
| MODIFIER | 1 | SNV       |

VEP annotated somatic variants

|          |   |           |
|----------|---|-----------|
| MODIFIER | 1 | SNV       |
| MODIFIER | 1 | SNV       |
| MODIFIER | 1 | SNV       |
| MODIFIER | 1 | SNV       |
| MODIFIER | 1 | SNV       |
| MODIFIER | 1 | SNV       |
| MODIFIER | 1 | SNV       |
| MODERATE | 1 | SNV       |
| MODIFIER | 1 | SNV       |
| MODERATE | 1 | SNV       |
| MODIFIER | 1 | SNV       |
| MODIFIER | 1 | SNV       |
| MODIFIER | 1 | SNV       |
| MODERATE | 1 | SNV       |
| MODERATE | 1 | SNV       |
| MODERATE | 1 | SNV       |
| MODIFIER | 1 | SNV       |
| MODIFIER | 1 | SNV       |
| MODIFIER | 1 | SNV       |
| MODIFIER | 1 | SNV       |
| LOW      | 1 | SNV       |
| MODIFIER | 1 | deletion  |
| MODIFIER | 1 | SNV       |
| LOW      | 1 | SNV       |
| LOW      | 1 | SNV       |
| MODIFIER | 1 | SNV       |
| MODIFIER | 1 | SNV       |
| MODIFIER | 1 | SNV       |
| MODIFIER | 1 | deletion  |
| LOW      | 1 | insertion |
| LOW      | 1 | SNV       |
| MODIFIER | 1 | SNV       |
| MODIFIER | 1 | SNV       |
| LOW      | 1 | SNV       |
| MODIFIER | 1 | SNV       |
| LOW      | 1 | SNV       |
| LOW      | 1 | SNV       |
| MODIFIER | 1 | deletion  |
| MODERATE | 1 | SNV       |
| MODIFIER | 1 | SNV       |
| LOW      | 1 | SNV       |
| MODIFIER | 1 | SNV       |
| MODIFIER | 1 | SNV       |
| MODIFIER | 1 | SNV       |
| LOW      | 1 | SNV       |
| MODIFIER | 1 | SNV       |
| MODIFIER | 1 | SNV       |
| MODIFIER | 1 | SNV       |
| MODIFIER | 1 | SNV       |
| MODIFIER | 1 | SNV       |
| MODIFIER | 1 | SNV       |
| MODIFIER | 1 | SNV       |
| MODIFIER | 1 | SNV       |
| LOW      | 1 | SNV       |
| MODIFIER | 1 | SNV       |
| MODIFIER | 1 | SNV       |

VEP annotated somatic variants

|          |   |          |
|----------|---|----------|
| MODIFIER | 1 | SNV      |
| LOW      | 1 | SNV      |
| MODIFIER | 1 | SNV      |
| MODERATE | 1 | SNV      |
| MODIFIER | 1 | SNV      |
| MODIFIER | 1 | SNV      |
| MODERATE | 1 | SNV      |
| MODIFIER | 1 | SNV      |
| MODIFIER | 1 | SNV      |
| MODIFIER | 1 | SNV      |
| MODERATE | 1 | SNV      |
| MODIFIER | 1 | SNV      |
| MODIFIER | 1 | SNV      |
| MODIFIER | 1 | SNV      |
| MODIFIER | 1 | SNV      |
| MODIFIER | 1 | SNV      |
| LOW      | 1 | SNV      |
| MODIFIER | 1 | SNV      |
| MODIFIER | 1 | SNV      |
| MODIFIER | 1 | SNV      |
| LOW      | 1 | SNV      |
| LOW      | 1 | SNV      |
| MODIFIER | 1 | SNV      |
| MODERATE | 1 | SNV      |
| MODIFIER | 1 | SNV      |
| MODIFIER | 1 | SNV      |
| MODIFIER | 1 | SNV      |
| LOW      | 1 | SNV      |
| MODIFIER | 1 | SNV      |
| MODIFIER | 1 | SNV      |
| MODIFIER | 1 | SNV      |
| MODIFIER | 1 | SNV      |
| MODERATE | 1 | SNV      |
| MODIFIER | 1 | SNV      |
| MODIFIER | 1 | SNV      |
| MODIFIER | 1 | SNV      |
| MODERATE | 1 | SNV      |
| MODIFIER | 1 | SNV      |
| MODIFIER | 1 | deletion |
| MODIFIER | 1 | SNV      |
| LOW      | 1 | SNV      |
| MODIFIER | 1 | SNV      |
| MODIFIER | 1 | SNV      |
| MODIFIER | 1 | SNV      |
| MODIFIER | 1 | SNV      |
| MODIFIER | 1 | SNV      |
| MODIFIER | 1 | SNV      |
| MODIFIER | 1 | SNV      |
| MODERATE | 1 | SNV      |
| MODIFIER | 1 | SNV      |
| MODIFIER | 1 | SNV      |
| MODIFIER | 1 | SNV      |
| LOW      | 1 | SNV      |
| MODERATE | 1 | SNV      |
| MODERATE | 1 | SNV      |





VEP annotated somatic variants

|          |   |           |
|----------|---|-----------|
| MODIFIER | 1 | insertion |
| MODERATE | 1 | SNV       |
| MODIFIER | 1 | SNV       |
| MODIFIER | 1 | SNV       |
| MODIFIER | 1 | SNV       |
| MODERATE | 1 | SNV       |
| LOW      | 1 | SNV       |
| MODIFIER | 1 | SNV       |
| LOW      | 1 | SNV       |
| LOW      | 1 | SNV       |
| LOW      | 1 | SNV       |
| MODIFIER | 1 | SNV       |
| MODIFIER | 1 | SNV       |
| LOW      | 1 | SNV       |
| MODIFIER | 1 | SNV       |
| MODIFIER | 1 | SNV       |
| MODIFIER | 1 | insertion |
| MODIFIER | 1 | SNV       |
| MODIFIER | 1 | SNV       |
| MODIFIER | 1 | insertion |
| MODERATE | 1 | SNV       |
| MODIFIER | 1 | SNV       |
| LOW      | 1 | SNV       |
| MODIFIER | 1 | deletion  |
| MODIFIER | 1 | SNV       |
| MODIFIER | 1 | SNV       |
| MODIFIER | 1 | SNV       |
| MODIFIER | 1 | SNV       |
| MODIFIER | 1 | SNV       |
| MODERATE | 1 | SNV       |
| MODERATE | 1 | SNV       |
| LOW      | 1 | SNV       |
| MODIFIER | 1 | SNV       |
| MODERATE | 1 | insertion |
| MODIFIER | 1 | SNV       |
| MODIFIER | 1 | SNV       |
| MODIFIER | 1 | SNV       |
| MODIFIER | 1 | insertion |
| LOW      | 1 | SNV       |
| MODIFIER | 1 | SNV       |
| MODIFIER | 1 | SNV       |
| MODIFIER | 1 | SNV       |
| MODIFIER | 1 | SNV       |
| MODIFIER | 1 | SNV       |
| MODIFIER | 1 | SNV       |
| MODIFIER | 1 | SNV       |
| MODIFIER | 1 | SNV       |
| MODIFIER | 1 | SNV       |
| MODIFIER | 1 | SNV       |
| MODIFIER | 1 | SNV       |
| MODIFIER | 1 | deletion  |
| MODIFIER | 1 | SNV       |
| MODIFIER | 1 | SNV       |
| MODERATE | 1 | SNV       |
| MODIFIER |   | SNV       |
| MODIFIER |   | SNV       |
| MODIFIER | 1 | insertion |

VEP annotated somatic variants

|          |   |           |
|----------|---|-----------|
| MODIFIER | 1 | deletion  |
| MODIFIER | 1 | SNV       |
| MODIFIER | 1 | SNV       |
| MODIFIER | 1 | SNV       |
| LOW      | 1 | SNV       |
| MODIFIER | 1 | SNV       |
| MODIFIER | 1 | SNV       |
| MODIFIER | 1 | SNV       |
| MODIFIER | 1 | SNV       |
| MODIFIER | 1 | SNV       |
| MODIFIER | 1 | SNV       |
| MODIFIER | 1 | SNV       |
| LOW      | 1 | SNV       |
| MODIFIER | 1 | SNV       |
| MODIFIER | 1 | SNV       |
| MODIFIER | 1 | SNV       |
| MODIFIER | 1 | SNV       |
| MODIFIER | 1 | insertion |
| MODIFIER | 1 | SNV       |
| MODIFIER | 1 | SNV       |
| MODIFIER | 1 | SNV       |
| MODERATE | 1 | SNV       |
| MODIFIER | 1 | SNV       |
| MODIFIER | 1 | SNV       |
| MODIFIER | 1 | SNV       |
| LOW      | 1 | SNV       |
| MODIFIER | 1 | insertion |
| MODIFIER | 1 | SNV       |
| LOW      | 1 | SNV       |
| MODIFIER | 1 | SNV       |
| MODIFIER | 1 | SNV       |
| MODIFIER | 1 | SNV       |
| MODIFIER | 1 | SNV       |
| MODIFIER | 1 | SNV       |
| MODIFIER | 1 | deletion  |
| MODERATE | 1 | SNV       |
| LOW      | 1 | SNV       |
| MODIFIER | 1 | SNV       |
| MODIFIER | 1 | SNV       |
| MODIFIER | 1 | SNV       |
| LOW      | 1 | SNV       |
| MODIFIER | 1 | deletion  |
| MODIFIER | 1 | SNV       |
| HIGH     | 1 | insertion |
| MODIFIER | 1 | SNV       |
| LOW      | 1 | SNV       |
| MODIFIER | 1 | SNV       |
| MODIFIER | 1 | SNV       |
| MODIFIER | 1 | SNV       |
| MODIFIER | 1 | SNV       |
| LOW      | 1 | SNV       |
| MODIFIER | 1 | SNV       |
| LOW      | 1 | SNV       |
| MODIFIER | 1 | insertion |
| MODIFIER | 1 | SNV       |
| MODIFIER | 1 | SNV       |
| LOW      | 1 | SNV       |



VEP annotated somatic variants

|          |   |           |
|----------|---|-----------|
| MODIFIER | 1 | SNV       |
| MODIFIER | 1 | deletion  |
| MODIFIER | 1 | SNV       |
| MODIFIER | 1 | SNV       |
| MODIFIER | 1 | SNV       |
| MODIFIER | 1 | SNV       |
| MODERATE | 1 | SNV       |
| MODIFIER | 1 | SNV       |
| MODIFIER | 1 | SNV       |
| MODIFIER |   | SNV       |
| MODIFIER |   | SNV       |
| MODIFIER | 1 | SNV       |
| MODIFIER | 1 | SNV       |
| MODIFIER | 1 | SNV       |
| MODIFIER | 1 | SNV       |
| MODIFIER | 1 | SNV       |
| MODIFIER | 1 | SNV       |
| MODIFIER | 1 | insertion |
| MODIFIER | 1 | insertion |
| LOW      | 1 | SNV       |
| LOW      | 1 | SNV       |
| MODIFIER | 1 | SNV       |
| MODIFIER | 1 | SNV       |
| LOW      | 1 | SNV       |
| MODIFIER | 1 | SNV       |
| LOW      | 1 | SNV       |
| LOW      | 1 | SNV       |
| MODIFIER | 1 | SNV       |
| MODERATE | 1 | SNV       |
| MODIFIER | 1 | SNV       |
| LOW      | 1 | SNV       |
| MODIFIER | 1 | SNV       |
| MODIFIER | 1 | SNV       |
| LOW      | 1 | SNV       |
| MODIFIER | 1 | SNV       |
| LOW      | 1 | SNV       |
| MODIFIER | 1 | SNV       |
| MODIFIER | 1 | SNV       |
| MODIFIER | 1 | SNV       |
| MODIFIER | 1 | SNV       |
| MODIFIER | 1 | SNV       |
| MODIFIER | 1 | SNV       |
| LOW      | 1 | SNV       |
| MODIFIER | 1 | SNV       |
| MODIFIER | 1 | SNV       |
| LOW      | 1 | SNV       |
| MODIFIER | 1 | SNV       |
| MODIFIER | 1 | SNV       |
| MODERATE | 1 | SNV       |
| MODIFIER | 1 | SNV       |
| MODIFIER | 1 | SNV       |
| MODIFIER | 1 | SNV       |
| MODIFIER | 1 | SNV       |
| MODERATE | 1 | SNV       |



VEP annotated somatic variants

|          |   |          |
|----------|---|----------|
| MODIFIER | 1 | SNV      |
| MODIFIER | 1 | SNV      |
| MODIFIER | 1 | SNV      |
| MODIFIER | 1 | deletion |
| MODIFIER | 1 | SNV      |
| MODIFIER | 1 | SNV      |
| MODIFIER | 1 | SNV      |
| MODIFIER | 1 | SNV      |
| MODIFIER | 1 | SNV      |
| MODIFIER | 1 | SNV      |
| MODIFIER | 1 | SNV      |
| LOW      | 1 | SNV      |
| MODIFIER | 1 | SNV      |
| MODIFIER | 1 | SNV      |
| MODIFIER | 1 | SNV      |
| MODIFIER | 1 | SNV      |
| MODIFIER | 1 | SNV      |
| MODIFIER | 1 | SNV      |
| MODIFIER | 1 | SNV      |
| LOW      | 1 | SNV      |
| LOW      | 1 | SNV      |
| MODIFIER | 1 | deletion |
| MODIFIER | 1 | SNV      |
| MODIFIER | 1 | deletion |
| MODIFIER | 1 | SNV      |
| LOW      | 1 | SNV      |
| MODIFIER | 1 | SNV      |
| LOW      | 1 | SNV      |
| MODIFIER | 1 | SNV      |
| LOW      | 1 | SNV      |
| LOW      | 1 | SNV      |
| LOW      | 1 | SNV      |
| MODIFIER | 1 | SNV      |
| MODIFIER | 1 | SNV      |
| MODERATE | 1 | SNV      |
| MODERATE | 1 | SNV      |
| LOW      | 1 | SNV      |
| MODIFIER | 1 | SNV      |
| MODIFIER | 1 | SNV      |
| MODERATE | 1 | SNV      |
| MODIFIER | 1 | SNV      |
| MODIFIER | 1 | SNV      |
| MODIFIER | 1 | SNV      |
| MODIFIER | 1 | deletion |
| MODIFIER | 1 | SNV      |
| MODIFIER | 1 | SNV      |
| MODIFIER | 1 | SNV      |
| MODIFIER | 1 | deletion |
| LOW      | 1 | SNV      |
| MODIFIER | 1 | deletion |
| LOW      | 1 | SNV      |
| MODIFIER | 1 | SNV      |
| MODIFIER | 1 | SNV      |
| MODIFIER | 1 | deletion |

VEP annotated somatic variants

|          |   |           |
|----------|---|-----------|
| MODIFIER | 1 | SNV       |
| LOW      | 1 | SNV       |
| MODIFIER | 1 | SNV       |
| MODIFIER | 1 | SNV       |
| MODIFIER | 1 | deletion  |
| MODIFIER | 1 | SNV       |
| MODIFIER | 1 | SNV       |
| MODIFIER | 1 | SNV       |
| MODERATE | 1 | SNV       |
| MODIFIER | 1 | SNV       |
| MODIFIER | 1 | SNV       |
| MODIFIER | 1 | SNV       |
| MODERATE | 1 | SNV       |
| MODIFIER | 1 | SNV       |
| MODIFIER | 1 | SNV       |
| MODIFIER | 1 | SNV       |
| MODIFIER | 1 | SNV       |
| LOW      | 1 | SNV       |
| MODIFIER | 1 | SNV       |
| LOW      | 1 | SNV       |
| MODIFIER | 1 | SNV       |
| LOW      | 1 | SNV       |
| MODERATE | 1 | SNV       |
| MODERATE | 1 | SNV       |
| LOW      | 1 | SNV       |
| MODIFIER | 1 | SNV       |
| MODERATE | 1 | SNV       |
| MODIFIER | 1 | SNV       |
| MODIFIER | 1 | SNV       |
| LOW      | 1 | SNV       |
| MODIFIER | 1 | SNV       |
| MODIFIER | 1 | SNV       |
| MODERATE | 1 | SNV       |
| MODIFIER | 1 | insertion |
| MODERATE | 1 | SNV       |
| MODIFIER | 1 | SNV       |
| MODERATE | 1 | SNV       |
| MODIFIER | 1 | SNV       |
| MODIFIER | 1 | SNV       |
| MODERATE | 1 | SNV       |
| MODERATE | 1 | SNV       |
| MODIFIER | 1 | SNV       |
| MODIFIER | 1 | SNV       |
| LOW      | 1 | SNV       |
| MODIFIER | 1 | deletion  |
| MODIFIER | 1 | SNV       |
| MODIFIER | 1 | SNV       |
| MODIFIER | 1 | insertion |
| MODIFIER | 1 | SNV       |
| MODIFIER | 1 | SNV       |
| HIGH     | 1 | SNV       |
| LOW      | 1 | SNV       |
| MODERATE | 1 | SNV       |
| MODIFIER | 1 | SNV       |
| MODIFIER | 1 | SNV       |

VEP annotated somatic variants

|          |   |           |
|----------|---|-----------|
| MODERATE | 1 | SNV       |
| LOW      | 1 | SNV       |
| MODIFIER | 1 | SNV       |
| MODIFIER | 1 | deletion  |
| LOW      | 1 | SNV       |
| MODIFIER | 1 | SNV       |
| MODIFIER | 1 | deletion  |
| MODIFIER | 1 | SNV       |
| MODIFIER | 1 | SNV       |
| LOW      | 1 | SNV       |
| MODIFIER | 1 | SNV       |
| MODIFIER | 1 | SNV       |
| MODIFIER | 1 | SNV       |
| MODIFIER | 1 | SNV       |
| LOW      | 1 | SNV       |
| MODIFIER | 1 | SNV       |
| MODIFIER | 1 | SNV       |
| MODERATE | 1 | SNV       |
| MODIFIER | 1 | SNV       |
| MODIFIER | 1 | SNV       |
| LOW      | 1 | SNV       |
| MODIFIER | 1 | deletion  |
| MODIFIER | 1 | SNV       |
| MODERATE | 1 | SNV       |
| MODIFIER | 1 | SNV       |
| MODERATE | 1 | SNV       |
| MODIFIER | 1 | SNV       |
| MODIFIER | 1 | SNV       |
| MODIFIER | 1 | deletion  |
| LOW      | 1 | SNV       |
| MODIFIER | 1 | SNV       |
| MODIFIER | 1 | SNV       |
| LOW      | 1 | SNV       |
| LOW      | 1 | SNV       |
| MODIFIER | 1 | SNV       |
| MODERATE | 1 | SNV       |
| MODERATE | 1 | SNV       |
| MODERATE | 1 | SNV       |
| MODIFIER | 1 | SNV       |
| LOW      | 1 | SNV       |
| MODIFIER | 1 | insertion |
| MODIFIER | 1 | SNV       |
| LOW      | 1 | SNV       |
| LOW      | 1 | SNV       |
| MODIFIER | 1 | SNV       |
| MODIFIER | 1 | SNV       |
| MODIFIER | 1 | SNV       |
| MODERATE | 1 | SNV       |
| MODIFIER | 1 | SNV       |
| MODIFIER | 1 | SNV       |
| MODIFIER | 1 | SNV       |
| MODIFIER | 1 | SNV       |
| MODERATE | 1 | SNV       |
| LOW      | 1 | SNV       |

VEP annotated somatic variants

|          |   |           |
|----------|---|-----------|
| MODIFIER | 1 | insertion |
| LOW      | 1 | SNV       |
| MODERATE | 1 | SNV       |
| LOW      | 1 | SNV       |
| MODIFIER | 1 | SNV       |
| MODIFIER | 1 | SNV       |
| MODIFIER | 1 | SNV       |
| MODERATE | 1 | SNV       |
| MODIFIER | 1 | SNV       |
| MODIFIER | 1 | SNV       |
| MODERATE | 1 | SNV       |
| MODIFIER | 1 | SNV       |
| MODIFIER | 1 | SNV       |
| MODIFIER | 1 | SNV       |
| MODERATE | 1 | SNV       |
| MODIFIER | 1 | SNV       |
| LOW      | 1 | SNV       |
| MODIFIER | 1 | SNV       |
| MODERATE | 1 | SNV       |
| MODIFIER | 1 | SNV       |
| MODIFIER | 1 | SNV       |
| MODERATE | 1 | SNV       |
| MODIFIER | 1 | SNV       |
| MODIFIER | 1 | SNV       |
| MODIFIER | 1 | SNV       |
| LOW      | 1 | SNV       |
| MODIFIER | 1 | SNV       |
| MODIFIER | 1 | SNV       |
| MODIFIER | 1 | SNV       |
| MODIFIER | 1 | SNV       |
| MODIFIER | 1 | SNV       |
| LOW      | 1 | SNV       |
| MODIFIER | 1 | SNV       |
| MODIFIER | 1 | SNV       |
| MODIFIER | 1 | SNV       |
| MODIFIER | 1 | SNV       |
| LOW      | 1 | SNV       |
| MODIFIER | 1 | SNV       |
| MODERATE | 1 | SNV       |
| LOW      | 1 | SNV       |
| MODIFIER | 1 | SNV       |
| MODIFIER | 1 | SNV       |
| MODIFIER | 1 | SNV       |
| LOW      | 1 | SNV       |
| MODIFIER | 1 | SNV       |
| MODERATE | 1 | SNV       |
| LOW      | 1 | SNV       |

VEP annotated somatic variants

|          |   |           |
|----------|---|-----------|
| HIGH     | 1 | insertion |
| LOW      | 1 | SNV       |
| MODIFIER | 1 | SNV       |
| MODIFIER | 1 | SNV       |
| MODIFIER | 1 | insertion |
| MODIFIER | 1 | SNV       |
| MODIFIER | 1 | SNV       |
| MODIFIER | 1 | SNV       |
| MODIFIER | 1 | SNV       |
| MODIFIER | 1 | SNV       |
| MODIFIER | 1 | SNV       |
| MODERATE | 1 | SNV       |
| MODIFIER | 1 | SNV       |
| LOW      | 1 | SNV       |
| MODIFIER |   | deletion  |
| MODIFIER | 1 | SNV       |
| MODERATE | 1 | SNV       |
| MODIFIER | 1 | SNV       |
| MODIFIER | 1 | SNV       |
| LOW      | 1 | SNV       |
| MODIFIER | 1 | SNV       |
| LOW      | 1 | SNV       |
| MODIFIER | 1 | SNV       |
| MODIFIER | 1 | SNV       |
| MODIFIER | 1 | SNV       |
| MODIFIER | 1 | SNV       |
| MODIFIER | 1 | SNV       |
| MODERATE | 1 | deletion  |
| MODIFIER | 1 | SNV       |
| MODIFIER | 1 | SNV       |
| MODERATE | 1 | SNV       |
| LOW      | 1 | SNV       |
| MODERATE | 1 | SNV       |
| MODIFIER | 1 | SNV       |
| MODIFIER | 1 | SNV       |
| MODIFIER | 1 | SNV       |
| LOW      | 1 | SNV       |
| MODIFIER | 1 | SNV       |
| MODIFIER | 1 | SNV       |
| MODIFIER | 1 | SNV       |
| MODIFIER | 1 | SNV       |
| LOW      | 1 | SNV       |
| LOW      | 1 | SNV       |
| MODIFIER | 1 | SNV       |
| MODIFIER | 1 | SNV       |
| MODIFIER | 1 | SNV       |
| LOW      | 1 | SNV       |
| LOW      | 1 | SNV       |
| MODIFIER | 1 | SNV       |
| MODIFIER | 1 | SNV       |
| MODIFIER | 1 | SNV       |
| MODIFIER | 1 | SNV       |
| MODIFIER | 1 | SNV       |
| MODIFIER | 1 | SNV       |

VEP annotated somatic variants

|          |   |           |
|----------|---|-----------|
| LOW      | 1 | SNV       |
| MODERATE | 1 | SNV       |
| LOW      | 1 | SNV       |
| MODIFIER | 1 | SNV       |
| MODIFIER | 1 | SNV       |
| MODERATE | 1 | SNV       |
| MODIFIER | 1 | SNV       |
| MODIFIER | 1 | SNV       |
| MODIFIER | 1 | SNV       |
| MODIFIER | 1 | SNV       |
| MODIFIER | 1 | SNV       |
| MODIFIER | 1 | SNV       |
| LOW      | 1 | SNV       |
| MODERATE | 1 | SNV       |
| MODIFIER | 1 | SNV       |
| MODIFIER | 1 | SNV       |
| MODIFIER | 1 | SNV       |
| MODIFIER | 1 | SNV       |
| MODIFIER | 1 | SNV       |
| LOW      | 1 | SNV       |
| MODIFIER | 1 | SNV       |
| MODIFIER | 1 | SNV       |
| MODIFIER | 1 | SNV       |
| MODIFIER | 1 | SNV       |
| MODERATE | 1 | SNV       |
| MODERATE | 1 | SNV       |
| MODERATE | 1 | SNV       |
| MODIFIER | 1 | insertion |
| MODERATE | 1 | SNV       |
| LOW      | 1 | SNV       |
| MODERATE | 1 | SNV       |
| MODIFIER | 1 | SNV       |
| LOW      | 1 | SNV       |
| MODERATE | 1 | SNV       |
| LOW      | 1 | SNV       |
| LOW      | 1 | SNV       |
| MODERATE | 1 | SNV       |
| MODIFIER | 1 | SNV       |
| MODIFIER | 1 | SNV       |
| MODIFIER | 1 | SNV       |



VEP annotated somatic variants

| HGVS_OFFSET | PHENO   | MINIMISED | ExAC_AF    |
|-------------|---------|-----------|------------|
|             |         | 1         |            |
|             |         | 1         | 0.03148    |
|             |         | 1         |            |
|             | 0,1     | 1         | 0.5896     |
|             |         | 1         |            |
|             |         | 1         | 0.5372     |
|             |         | 1         | 0.6565     |
|             |         | 1         | 0.00002832 |
|             |         | 1         |            |
|             | 1,1,1   | 1         | 0.2943     |
|             |         | 1         | 0.04186    |
|             |         | 1         | 0.1952     |
|             |         | 1         | 0.8436     |
|             | 0,1     | 1         | 0.02675    |
|             |         | 1         |            |
|             |         | 1         |            |
|             |         | 1         |            |
|             |         | 1         | 0.00001017 |
|             |         | 1         | 0.04764    |
|             |         | 1         | 0.6231     |
|             |         | 1         | 0.3279     |
|             |         | 1         |            |
|             |         | 1         |            |
|             | 0,1     | 1         | 0.1609     |
|             |         | 1         |            |
|             | 0,1     | 1         | 0.2063     |
|             |         | 1         | 0.4918     |
|             |         | 1         | 0.0003527  |
|             |         | 1         | 0.6522     |
|             |         | 1         | 0.02838    |
|             |         | 1         | 0.1771     |
| 4           |         | 1         | 0.04215    |
|             |         | 1         |            |
|             | 0,1,1,1 | 1         | 0.2383     |
|             | 1       | 1         | 0.5905     |
|             |         | 1         | 0.03403    |
| 6           |         | 1         |            |
|             |         | 1         | 0.3969     |
|             | 0,1     | 1         | 0.4859     |
|             |         | 1         |            |
|             |         | 1         |            |
|             | 0,1,1   | 1         | 0.2049     |
|             |         | 1         |            |
|             |         | 1         | 0.2525     |
|             | 1,1,0   | 1         | 0.01398    |
|             | 1,1     | 1         | 0.2044     |
|             |         | 1         |            |
|             | 1       | 1         | 0.3711     |
|             |         | 1         |            |
|             |         | 1         | 0.7586     |
|             |         | 1         |            |

VEP annotated somatic variants

|                     |   |            |
|---------------------|---|------------|
|                     | 1 | 0.2411     |
|                     | 1 | 0.1891     |
|                     | 1 |            |
|                     | 1 |            |
|                     | 1 | 0.07678    |
|                     | 1 |            |
|                     | 1 | 0.7742     |
| 0,1                 | 1 | 0.1338     |
|                     | 1 | 0.2575     |
|                     | 1 | 0.2067     |
|                     | 1 | 0.1996     |
|                     | 1 |            |
| 0,1                 | 1 | 0.2086     |
|                     | 1 | 0.8381     |
| 0,1,1               | 1 | 0.1381     |
|                     | 1 | 0.08986    |
|                     | 1 | 0.04656    |
|                     | 1 |            |
|                     | 1 |            |
|                     | 1 |            |
|                     | 1 |            |
|                     | 1 | 0.00001883 |
|                     | 1 |            |
|                     | 1 |            |
| 0,1                 | 1 | 0.2707     |
|                     | 1 | 0.2765     |
|                     | 1 |            |
| 0,1                 | 1 | 0.03878    |
|                     | 1 |            |
|                     | 1 | 0.05899    |
|                     | 1 | 0.2946     |
|                     | 1 | 0.1807     |
|                     | 1 | 0.04946    |
|                     | 1 |            |
|                     | 1 |            |
| 0,1,1,1,1,1,1,1,1,1 | 1 | 0.3429     |
| 0,1,1,1             | 1 | 0.2193     |
|                     | 1 |            |
|                     | 1 | 0.05041    |
|                     | 1 |            |
|                     | 1 | 0.6179     |
|                     | 1 | 0.6092     |
|                     | 1 |            |
|                     | 1 | 0.4945     |
|                     | 1 | 0.1662     |
|                     | 1 |            |
|                     | 1 | 0.1418     |
| 1,1,1               | 1 | 0.05155    |
|                     | 1 |            |
|                     | 1 | 0.2377     |
|                     | 1 |            |
|                     | 1 | 0.04516    |

VEP annotated somatic variants

|           |   |          |
|-----------|---|----------|
|           | 1 |          |
|           | 1 |          |
|           | 1 | 0.4394   |
|           | 1 | 0.3724   |
|           | 1 |          |
|           | 1 |          |
|           | 1 | 0.6527   |
|           | 1 |          |
|           | 1 | 0.1682   |
|           | 1 | 0.03362  |
| 0,1       | 1 |          |
| 1         | 1 | 0.02535  |
| 1         | 1 | 0.1074   |
|           | 1 | 0.3557   |
|           | 1 | 0.08105  |
|           | 1 |          |
|           | 1 | 0.2591   |
|           | 1 |          |
|           | 1 |          |
|           | 1 | 0.2597   |
|           | 1 | 0.4041   |
|           | 1 | 0.27     |
|           | 1 | 0.9352   |
|           | 1 | 0.4145   |
| 0,1       | 1 | 0.2816   |
|           | 1 | 0.3535   |
| 0,1,1     | 1 | 0.7634   |
|           | 1 |          |
|           | 1 |          |
| 1,1       | 1 | 0.4174   |
| 1         | 1 | 0.1141   |
|           | 1 |          |
|           | 1 | 0.1688   |
|           | 1 |          |
|           | 1 |          |
| 1         | 1 | 0.04792  |
|           | 1 |          |
|           | 1 | 0.004793 |
| 1,1       | 1 |          |
| 1         | 1 |          |
|           | 1 |          |
| 1         | 1 | 0.1072   |
| 0,1,1,1,1 | 1 | 0.2671   |
|           | 1 | 0.01512  |
|           | 1 | 0.05177  |
|           | 1 |          |
| 1         | 1 |          |
| 0,1       | 1 | 0.1092   |
|           | 1 |          |
|           | 1 |          |
| 0,1,1     | 1 | 0.6755   |
|           | 1 | 0.279    |

VEP annotated somatic variants

|   |           |   |          |
|---|-----------|---|----------|
|   |           | 1 |          |
|   | 0,1,1     | 1 | 0.2485   |
|   | 1         | 1 |          |
|   |           | 1 |          |
|   |           | 1 | 0.04318  |
|   |           | 1 | 0.4009   |
| 1 |           | 1 | 0.1578   |
| 6 |           | 1 |          |
|   | 1         | 1 |          |
|   | 0,1,1,1,1 | 1 | 0.3923   |
|   |           | 1 | 0.5446   |
|   |           | 1 | 0.2958   |
|   | 1,0,1     | 1 | 0.2026   |
|   | 0,1,1     | 1 | 0.1701   |
|   |           | 1 |          |
|   |           | 1 |          |
|   |           | 1 | 0.1606   |
|   |           | 1 | 0.2612   |
|   |           | 1 |          |
|   |           | 1 |          |
|   |           | 1 | 0.6596   |
|   |           | 1 |          |
|   |           | 1 | 0.074    |
|   |           | 1 | 0.2135   |
|   | 0,1       | 1 | 0.2792   |
|   |           | 1 |          |
|   |           | 1 | 0.263    |
|   |           | 1 | 0.01044  |
|   |           | 1 | 0.002674 |
|   |           | 1 |          |
|   | 0,1       | 1 | 0.2681   |
|   |           | 1 |          |
|   |           | 1 |          |
|   |           | 1 | 0.09573  |
|   |           | 1 |          |
|   |           | 1 |          |
|   |           | 1 |          |
|   |           | 1 | 0.004711 |
|   |           | 1 |          |
|   |           | 1 | 0.1852   |
|   | 0,1,1,1   | 1 | 0.09765  |
|   |           | 1 |          |
|   |           | 1 |          |
|   |           | 1 | 0.008002 |
|   |           | 1 | 0.2481   |
|   |           | 1 | 0.3299   |
|   |           | 1 |          |
|   |           | 1 |          |
|   |           | 1 |          |
|   | 1,0       | 1 | 0.08206  |
|   |           | 1 | 0.01244  |
| 3 |           | 1 | 0.4123   |
|   | 0,1       | 1 | 0.3146   |

VEP annotated somatic variants

|       |   |            |
|-------|---|------------|
|       | 1 | 0.2931     |
|       | 1 |            |
|       | 1 | 0.001666   |
|       | 1 |            |
|       | 1 | 0.00146    |
|       | 1 |            |
|       | 1 |            |
|       | 1 | 0.1224     |
|       | 1 | 0.1749     |
|       | 1 |            |
|       | 1 | 0.1485     |
|       | 1 |            |
|       | 1 | 0.0902     |
| 0,1   | 1 | 0.3648     |
| 0,0,1 | 1 | 0.2618     |
|       | 1 | 0.5861     |
|       | 1 |            |
| 0,1   | 1 | 0.2132     |
|       | 1 |            |
| 0,1   | 1 | 0.01214    |
|       | 1 |            |
|       | 1 |            |
|       | 1 | 0.3821     |
|       | 1 | 0.7101     |
|       | 1 | 0.00009422 |
|       | 1 |            |
|       | 1 | 0.0179     |
|       | 1 |            |
| 0,1   | 1 | 0.1871     |
|       | 1 |            |
|       | 1 | 0.02002    |
|       | 1 | 0.06587    |
| 1     | 1 | 0.3054     |
|       | 1 |            |
|       | 1 |            |
|       | 1 |            |
| 0,1   | 1 | 0.1642     |
|       | 1 |            |
| 0,1   | 1 | 0.1664     |
|       | 1 | 0.2565     |
|       | 1 | 0.06684    |
|       | 1 |            |
|       | 1 |            |
|       | 1 |            |
|       | 1 | 0.7031     |
|       | 1 | 0.6318     |
|       | 1 |            |
|       | 1 |            |
| 1,1,1 | 1 | 0.6748     |
| 1,1,1 | 1 | 0.2248     |
|       | 1 | 0.165      |
| 0,1   | 1 | 0.5317     |
|       | 1 |            |

VEP annotated somatic variants

|       |   |          |
|-------|---|----------|
|       | 1 |          |
| 0,1   | 1 | 0.1048   |
|       | 1 |          |
| 1     | 1 | 0.1007   |
|       | 1 | 0.4772   |
|       | 1 | 0.29     |
|       | 1 |          |
|       | 1 | 0.8317   |
|       | 1 | 0.03131  |
|       | 1 |          |
|       | 1 |          |
|       | 1 |          |
|       | 1 | 0.1529   |
| 1     | 1 | 0.2809   |
|       | 1 |          |
|       | 1 | 0.1392   |
|       | 1 | 0.8905   |
|       | 1 |          |
|       | 1 |          |
|       | 1 | 0.373    |
|       | 1 |          |
| 0,1,1 | 1 | 0.2106   |
|       | 1 |          |
| 1     | 1 | 0.3698   |
| 1,1   | 1 | 0.2153   |
|       | 1 |          |
| 0,1   | 1 | 0.008589 |
|       | 1 | 0.4818   |
|       | 1 | 0.219    |
|       | 1 |          |
|       | 1 |          |
|       | 1 |          |
|       | 1 |          |
| 0,1   | 1 | 0.3733   |
|       | 1 | 0.3092   |
|       | 1 |          |
| 1     | 1 | 0.5382   |
|       | 1 |          |
| 0,1,1 | 1 | 0.3336   |
| 1     | 1 | 0.167    |
|       | 1 |          |
|       | 1 |          |
|       | 1 |          |
| 0,1   | 1 | 0.06243  |
|       | 1 | 0.2583   |
|       | 1 | 0.007711 |
|       | 1 |          |
|       | 1 |          |
| 0,1,1 | 1 | 0.1256   |
|       | 1 |          |
|       | 1 | 0.007222 |
|       | 1 |          |
|       | 1 | 0.392    |
|       | 1 | 0.5729   |
|       | 1 |          |

VEP annotated somatic variants

|       |   |             |
|-------|---|-------------|
| 0,1   | 1 | 0.4758      |
|       | 1 | 0.4194      |
|       | 1 | 0.1521      |
|       | 1 | 0.3814      |
|       | 1 | 0.2521      |
| 0,1   | 1 | 0.05888     |
| 1     | 1 | 0.3263      |
|       | 1 | 0.008191    |
|       | 1 |             |
|       | 1 | 0.000009417 |
|       | 1 | 0.6413      |
| 0,1   | 1 | 0.6442      |
| 0,1,1 | 1 | 0.1593      |
|       | 1 |             |
|       | 1 |             |
|       | 1 |             |
|       | 1 |             |
|       | 1 |             |
| 0,1   | 1 | 0.2324      |
|       | 1 | 0.5075      |
| 0,1   | 1 | 0.2714      |
|       | 1 |             |
|       | 1 | 0.6395      |
|       | 1 |             |
|       | 1 | 0.1605      |
|       | 1 |             |
|       | 1 | 0.3096      |
|       | 1 | 0.127       |
|       | 1 |             |
| 0,1   | 1 | 0.2922      |
|       | 1 |             |
|       | 1 | 0.4248      |
|       | 1 | 0.09731     |
|       | 1 |             |
| 0,1   | 1 | 0.3558      |
|       | 1 |             |
|       | 1 |             |
|       | 1 | 0.00009768  |
|       | 1 | 0.4922      |
|       | 1 |             |
|       | 1 | 0.3569      |
|       | 1 | 0.2382      |
|       | 1 |             |
|       | 1 | 0.2471      |
|       | 1 | 0.00006629  |
|       | 1 |             |
|       | 1 |             |
|       | 1 |             |
|       | 1 |             |
|       | 1 |             |
|       | 1 |             |
| 0,1   | 1 | 0.4992      |
|       | 1 | 0.003663    |
|       | 1 |             |

VEP annotated somatic variants

|   |       |   |         |
|---|-------|---|---------|
|   |       | 1 |         |
|   |       | 1 | 0.1055  |
|   |       | 1 |         |
|   |       | 1 | 0.5263  |
|   |       | 1 |         |
|   |       | 1 | 0.3469  |
|   |       | 1 |         |
|   |       | 1 |         |
|   |       | 1 | 0.04988 |
|   |       | 1 |         |
|   |       | 1 |         |
|   |       | 1 | 0.2816  |
|   |       | 1 | 0.05212 |
|   |       | 1 | 0.01924 |
|   |       | 1 |         |
|   |       | 1 |         |
|   |       | 1 | 0.06228 |
|   | 0,1   | 1 | 0.2539  |
|   |       | 1 | 0.7335  |
|   |       | 1 |         |
|   |       | 1 | 0.1386  |
|   |       | 1 | 0.0447  |
|   |       | 1 | 0.3139  |
|   |       | 1 | 0.3064  |
|   |       | 1 |         |
|   |       | 1 | 0.2247  |
|   |       | 1 |         |
|   |       | 1 | 0.7217  |
|   | 0,1,1 | 1 | 0.1404  |
|   | 1     | 1 | 0.0216  |
|   |       | 1 |         |
|   |       | 1 |         |
|   |       | 1 | 0.01203 |
|   | 0,1   | 1 | 0.2441  |
|   |       | 1 | 0.3444  |
|   |       | 1 | 0.1824  |
|   |       | 1 | 0.0856  |
|   |       | 1 |         |
|   |       | 1 |         |
|   |       | 1 | 0.05447 |
|   |       | 1 | 0.3524  |
|   |       | 1 | 0.08746 |
|   |       | 1 |         |
|   |       | 1 |         |
|   |       | 1 | 0.4425  |
|   |       | 1 |         |
|   |       | 1 |         |
|   |       | 1 |         |
|   |       | 1 |         |
|   |       | 1 |         |
| 1 |       | 1 |         |
|   |       | 1 | 0.2668  |



VEP annotated somatic variants

|         |   |         |
|---------|---|---------|
| 0,1,1   | 1 | 0.1835  |
|         | 1 |         |
|         | 1 | 0.5731  |
| 1,1,1   | 1 | 0.5382  |
|         | 1 | 0.2455  |
| 0,1     | 1 | 0.4439  |
| 0,1     | 1 | 0.3923  |
| 0,1     | 1 | 0.4253  |
|         | 1 |         |
|         | 1 |         |
|         | 1 | 0.4443  |
|         | 1 |         |
| 0,1     | 1 | 0.629   |
|         | 1 | 0.5189  |
|         | 1 | 0.5189  |
| 0,1     | 1 | 0.06727 |
|         | 1 |         |
|         | 1 |         |
|         | 1 | 0.01422 |
|         | 1 |         |
|         | 1 |         |
|         | 1 | 0.0898  |
| 1,1,1   | 1 | 0.1946  |
| 0,1     | 1 | 0.07443 |
|         | 1 |         |
| 1       | 1 |         |
|         | 1 | 0.4472  |
| 1,1     | 1 | 0.07556 |
| 1,1,1   | 1 | 0.4819  |
| 0,1     | 1 | 0.1074  |
|         | 1 |         |
|         | 1 | 0.3392  |
|         | 1 |         |
|         | 1 |         |
|         | 1 | 0.01795 |
|         | 1 |         |
| 1,0,1   | 1 | 0.3582  |
|         | 1 |         |
|         | 1 | 0.1197  |
| 1,1,1,1 | 1 | 0.1815  |
|         | 1 | 0.1182  |
| 1,1,1   | 1 |         |
|         | 1 | 0.33    |
| 1       | 1 | 0.1769  |
|         | 1 | 0.2232  |
|         | 1 | 0.4569  |
| 0,1     | 1 | 0.3646  |
|         | 1 |         |
|         | 1 |         |
|         | 1 | 0.687   |
|         | 1 | 0.2074  |
|         | 1 | 0.132   |
|         | 1 | 0.01088 |
|         | 1 | 0.09125 |

VEP annotated somatic variants

|           |   |           |
|-----------|---|-----------|
|           | 1 |           |
|           | 1 | 0.5703    |
|           | 1 |           |
|           | 1 |           |
|           | 1 |           |
|           | 1 | 0.1865    |
|           | 1 | 0.8358    |
| 0,1       | 1 | 0.3537    |
|           | 1 | 0.02158   |
|           | 1 |           |
|           | 1 | 0.7224    |
|           | 1 |           |
|           | 1 | 0.7231    |
|           | 1 | 0.4349    |
|           | 1 | 0.2018    |
|           | 1 |           |
| 0,1       | 1 | 0.1317    |
|           | 1 |           |
|           | 1 | 0.1463    |
|           | 1 |           |
|           | 1 | 0.0004545 |
|           | 1 | 0.09221   |
|           | 1 |           |
|           | 1 | 0.259     |
|           | 1 | 0.3398    |
|           | 1 |           |
|           | 1 |           |
|           | 1 |           |
|           | 1 |           |
|           | 1 |           |
|           | 1 |           |
| 0,1       | 1 | 0.4815    |
| 1,1,1     | 1 | 0.3196    |
|           | 1 | 0.6734    |
|           | 1 |           |
| 1         | 1 | 0.3437    |
|           | 1 |           |
|           | 1 | 0.01591   |
|           | 1 |           |
|           | 1 | 0.06259   |
|           | 1 | 0.2972    |
| 1,1       | 1 | 0.01523   |
|           | 1 |           |
|           | 1 |           |
|           | 1 |           |
| 1,0,1     | 1 | 0.1131    |
| 0,1       | 1 | 0.2513    |
| 1         | 1 |           |
|           | 1 | 0.6889    |
| 0,1       | 1 | 0.6543    |
| 0,1       | 1 | 0.2164    |
|           | 1 |           |
|           | 1 |           |
| 1,1,1,1,1 | 1 | 0.7392    |
|           | 1 |           |

VEP annotated somatic variants

|         |   |          |
|---------|---|----------|
| 0,1,1   | 1 | 0.3567   |
|         | 1 | 0.2398   |
|         | 1 | 0.3425   |
|         | 1 | 0.3214   |
|         | 1 |          |
|         | 1 |          |
|         | 1 | 0.006023 |
|         | 1 | 0.4962   |
|         | 1 | 0.375    |
|         | 1 | 0.4422   |
|         | 1 |          |
|         | 1 |          |
|         | 1 | 0.3756   |
|         | 1 |          |
| 1       | 1 | 0.545    |
|         | 1 |          |
|         | 1 | 0.01862  |
|         | 1 | 0.3246   |
|         | 1 | 0.2255   |
| 0,1     | 1 | 0.3574   |
| 0,1     | 1 | 0.3765   |
|         | 1 | 0.04582  |
|         | 1 | 0.03496  |
|         | 1 |          |
|         | 1 |          |
|         | 1 | 0.1744   |
| 0,1     | 1 | 0.1749   |
|         | 1 | 0.07508  |
| 0,1     | 1 | 0.104    |
| 0,1,1   | 1 | 0.3042   |
|         | 1 |          |
|         | 1 | 0.09149  |
|         | 1 |          |
|         | 1 |          |
| 0,1     | 1 | 0.2645   |
|         | 1 | 0.07495  |
|         | 1 | 0.08294  |
|         | 1 | 0.03227  |
|         | 1 | 0.006653 |
| 0,1     | 1 | 0.3734   |
| 0,1     | 1 | 0.1219   |
|         | 1 | 0.2988   |
|         | 1 |          |
|         | 1 | 0.4971   |
|         | 1 | 0.9685   |
|         | 1 | 0.09321  |
|         | 1 | 0.1111   |
|         | 1 |          |
|         | 1 |          |
| 0,1     | 1 | 0.2654   |
| 0,1,1   | 1 | 0.1952   |
|         | 1 | 0.07335  |
| 0,1,1,1 | 1 | 0.2968   |

VEP annotated somatic variants

|         |   |          |
|---------|---|----------|
| 1,0     | 1 | 0.1589   |
| 0,1     | 1 | 0.1204   |
|         | 1 | 0.5452   |
|         | 1 |          |
| 0,1     | 1 | 0.3562   |
| 0,1     | 1 | 0.4938   |
|         | 1 |          |
|         | 1 | 0.3278   |
|         | 1 | 0.2318   |
|         | 1 | 0.04741  |
| 0,1,1   | 1 | 0.3019   |
|         | 1 |          |
|         | 1 |          |
|         | 1 |          |
|         | 1 |          |
|         | 1 | 0.08885  |
|         | 1 | 0.6689   |
|         | 1 | 0.1861   |
| 0,1,1,1 | 1 | 0.25     |
|         | 1 |          |
|         | 1 | 0.03591  |
|         | 1 |          |
|         | 1 | 0.2771   |
|         | 1 | 0.008189 |
|         | 1 |          |
|         | 1 | 0.1178   |
|         | 1 |          |
| 1       | 1 | 0.5896   |
|         | 1 | 0.361    |
|         | 1 |          |
|         | 1 |          |
|         | 1 | 0.7893   |
|         | 1 |          |
| 0,1,1,1 | 1 | 0.0403   |
|         | 1 | 0.6174   |
|         | 1 | 0.02488  |
|         | 1 | 0.06135  |
|         | 1 | 0.0613   |
| 0,1     | 1 | 0.4263   |
|         | 1 |          |
|         | 1 |          |
|         | 1 |          |
|         | 1 | 0.378    |
|         | 1 | 0.1046   |
|         | 1 |          |
| 1,1,1,1 | 1 | 0.1024   |
| 1       | 1 | 0.001638 |
|         | 1 | 0.02386  |
|         | 1 | 0.3632   |
|         | 1 | 0.6277   |
|         | 1 |          |
|         | 1 |          |
|         | 1 |          |

VEP annotated somatic variants

|     |         |         |           |
|-----|---------|---------|-----------|
| 2   | 0,1     | 1       | 0.4039    |
|     |         | 1       |           |
|     | 0,1,1,1 | 1       | 0.1367    |
|     |         | 1       | 0.4369    |
|     |         | 1       |           |
|     | 0,1     | 1       | 0.1681    |
|     |         | 1       |           |
|     |         | 1       | 0.5739    |
|     |         | 1       | 0.2321    |
|     |         | 1       |           |
| 5   |         | 1       | 0.03824   |
|     |         | 1       | 0.119     |
|     | 1       | 1       | 0.08282   |
|     |         | 1       |           |
|     | 0,1     | 1       | 0.2594    |
|     | 1       | 1       | 0.4891    |
|     |         | 1       | 0.0001883 |
|     | 0,1,1   | 1       | 0.2596    |
|     |         | 1       |           |
|     |         | 1       | 0.3367    |
|     |         | 1       |           |
|     |         | 1       |           |
|     | 1,0,1,1 | 1       | 0.7279    |
|     |         | 1       | 0.3839    |
|     |         | 1       |           |
|     | 1       | 0.2432  |           |
|     | 1       |         |           |
|     | 1       | 0.4611  |           |
| 0,1 | 1       | 0.2913  |           |
|     | 1       |         |           |
|     | 1       | 0.2032  |           |
|     | 1       | 0.2503  |           |
|     | 1       | 0.05641 |           |
|     | 1       |         |           |
| 2   | 0,1     | 1       | 0.3873    |
|     |         | 1       | 0.4655    |
|     |         | 1       | 0.003644  |
|     |         | 1       |           |
|     |         | 1       |           |
|     | 1,0     | 1       | 0.1703    |
|     | 0,1     | 1       |           |
|     | 1,1,1,1 | 1       | 0.2567    |
|     |         | 1       | 0.259     |
|     |         | 1       | 0.03444   |
|     | 1       |         |           |
|     | 1       |         |           |
|     | 1       |         |           |
|     | 1       | 0.2982  |           |
|     | 1       |         |           |
|     | 1       | 0.0104  |           |

VEP annotated somatic variants

|   |         |   |           |
|---|---------|---|-----------|
|   |         | 1 |           |
|   |         | 1 | 0.6043    |
|   |         | 1 | 0.1538    |
|   |         | 1 | 0.2263    |
|   | 1,1     | 1 |           |
|   |         | 1 | 0.2468    |
|   |         | 1 |           |
|   |         | 1 | 0.8936    |
|   |         | 1 | 0.00805   |
|   |         | 1 |           |
|   |         | 1 |           |
|   |         | 1 | 0.01316   |
|   |         | 1 | 0.09972   |
|   |         | 1 | 0.5307    |
|   |         | 1 |           |
|   |         | 1 |           |
|   |         | 1 | 0.7398    |
|   |         | 1 | 0.09815   |
|   |         | 1 | 0.2348    |
|   | 0,1     | 1 | 0.2286    |
| 1 |         | 1 | 0.3253    |
|   |         | 1 |           |
|   |         | 1 | 0.3096    |
|   | 0,1     | 1 | 0.3886    |
|   | 0,1     | 1 | 0.459     |
|   |         | 1 | 0.3642    |
|   |         | 1 |           |
|   |         | 1 | 0.2029    |
|   |         | 1 | 0.1426    |
|   |         | 1 | 0.05878   |
|   |         | 1 |           |
|   |         | 1 | 0.04447   |
|   |         | 1 |           |
|   |         | 1 | 0.002166  |
|   |         | 1 |           |
|   | 1,1,1,1 | 1 | 0.1387    |
|   |         | 1 | 0.3767    |
|   | 0,1     | 1 | 0.3191    |
|   | 0,1     | 1 | 0.3167    |
|   | 0,1     | 1 | 0.02309   |
|   |         | 1 |           |
|   | 0,1,1   | 1 | 0.167     |
|   |         | 1 |           |
|   |         | 1 | 0.0004807 |
|   |         | 1 |           |
|   |         | 1 | 0.02236   |
|   |         | 1 | 0.2071    |
|   |         | 1 |           |
|   |         | 1 |           |
|   |         | 1 |           |
| 1 |         | 1 |           |
|   |         | 1 | 0.09076   |
|   |         | 1 | 0.3708    |

VEP annotated somatic variants

|   |         |   |           |
|---|---------|---|-----------|
|   |         | 1 | 0.1882    |
|   |         | 1 | 0.001346  |
|   |         | 1 |           |
|   |         | 1 |           |
|   |         | 1 |           |
|   |         | 1 | 0.4483    |
|   |         | 1 | 0.7499    |
|   | 0,1     | 1 | 0.4939    |
|   |         | 1 |           |
|   |         | 1 |           |
|   |         | 1 |           |
|   |         | 1 | 0.249     |
|   |         | 1 |           |
|   |         | 1 | 0.755     |
|   |         | 1 | 0.7038    |
|   | 0,1     | 1 | 0.7458    |
|   |         | 1 | 0.02504   |
| 1 |         | 1 |           |
|   |         | 1 |           |
|   |         | 1 | 0.7948    |
|   |         | 1 | 0.5743    |
|   |         | 1 |           |
|   |         | 1 |           |
|   |         | 1 | 0.2988    |
|   | 0,1,1,1 | 1 | 0.455     |
|   |         | 1 |           |
|   |         | 1 |           |
|   |         | 1 |           |
|   |         | 1 | 0.649     |
|   |         | 1 | 0.2791    |
|   |         | 1 |           |
|   |         | 1 | 0.09897   |
|   |         | 1 |           |
|   |         | 1 | 0.2549    |
|   |         | 1 |           |
|   |         | 1 | 0.4814    |
|   |         | 1 | 0.003056  |
|   |         | 1 | 0.2364    |
|   |         | 1 | 0.1965    |
|   |         | 1 |           |
|   |         | 1 | 0.5452    |
|   |         | 1 | 0.05559   |
|   |         | 1 | 0.0003296 |
|   |         | 1 |           |
|   |         | 1 | 0.3822    |
|   |         | 1 |           |
|   |         | 1 | 0.3552    |
|   |         | 1 | 0.01932   |
|   |         | 1 |           |
|   | 0,1     | 1 | 0.06482   |
|   |         | 1 | 0.01498   |
|   |         | 1 |           |

VEP annotated somatic variants

|             |   |           |
|-------------|---|-----------|
|             | 1 |           |
|             | 1 |           |
|             | 1 |           |
|             | 1 |           |
|             | 1 |           |
| 1           | 1 | 0.8687    |
|             | 1 | 0.4087    |
|             | 1 | 0.04869   |
|             | 1 | 0.7515    |
|             | 1 |           |
|             | 1 | 0.4363    |
|             | 1 |           |
| 0,1         | 1 | 0.208     |
|             | 1 | 0.7009    |
|             | 1 |           |
| 0,1         | 1 | 0.1121    |
|             | 1 | 0.3628    |
|             | 1 | 0.3071    |
| 0,1         | 1 | 0.4656    |
|             | 1 |           |
| 0,1         | 1 | 0.8382    |
|             | 1 |           |
|             | 1 | 0.007984  |
|             | 1 |           |
|             | 1 |           |
| 0,1,1       | 1 | 0.3493    |
|             | 1 | 0.2765    |
| 0,1,1       | 1 | 0.335     |
|             | 1 | 0.06293   |
|             | 1 | 0.4101    |
| 0,1,1       | 1 | 0.1644    |
|             | 1 |           |
|             | 1 |           |
| 1,0         | 1 | 0.0003955 |
|             | 1 |           |
|             | 1 | 0.6258    |
|             | 1 |           |
| 0,1         | 1 | 0.001271  |
|             | 1 |           |
|             | 1 | 0.0008627 |
|             | 1 |           |
|             | 1 |           |
|             | 1 | 0.08697   |
|             | 1 | 0.1754    |
|             | 1 | 0.09871   |
|             | 1 | 0.2564    |
|             | 1 |           |
|             | 1 | 0.1898    |
| 1,0,1,1,1,1 | 1 | 0.142     |
|             | 1 | 0.2802    |
|             | 1 |           |
|             | 1 | 0.4199    |
|             | 1 |           |



VEP annotated somatic variants

|    |         |   |             |
|----|---------|---|-------------|
|    |         | 1 | 0.02262     |
|    |         | 1 |             |
|    |         | 1 | 0.4406      |
|    |         | 1 |             |
|    |         | 1 | 0.2607      |
|    |         | 1 | 0.3305      |
|    |         | 1 | 0.04049     |
|    |         | 1 | 0.00387     |
|    |         | 1 |             |
|    |         | 1 | 0.5775      |
|    |         | 1 | 0.4029      |
|    |         | 1 | 0.7479      |
|    |         | 1 | 0.4176      |
|    | 0,1,1,1 | 1 | 0.3939      |
|    | 0,1,1,1 | 1 | 0.8497      |
|    | 0,1,1,1 | 1 | 0.3707      |
|    |         | 1 | 0.3593      |
|    |         | 1 |             |
|    |         | 1 | 0.01465     |
|    |         | 1 |             |
| 2  |         | 1 | 0.2347      |
|    |         | 1 |             |
|    | 0,1     | 1 | 0.214       |
|    | 1,1     | 1 | 0.3834      |
|    | 1       | 1 | 0.6782      |
|    |         | 1 | 0.3856      |
|    |         | 1 | 0.5883      |
| 14 |         | 1 |             |
|    |         | 1 | 0.3006      |
|    | 0,1,1   | 1 | 0.2874      |
|    | 0,1     | 1 | 0.1211      |
|    |         | 1 |             |
|    | 0,1     | 1 | 0.5876      |
|    |         | 1 |             |
|    | 0,1,1   | 1 | 0.6063      |
|    | 0,1     | 1 | 0.4096      |
|    | 1,0     | 1 | 0.6317      |
|    | 1,1,1   | 1 | 0.2457      |
|    |         | 1 | 0.2025      |
|    | 1,1     | 1 | 0.1121      |
|    |         | 1 |             |
|    |         | 1 | 0.3089      |
|    |         | 1 | 0.000009416 |
|    |         | 1 | 0.5663      |
|    |         | 1 |             |
|    |         | 1 |             |
|    |         | 1 |             |
|    |         | 1 |             |
|    |         | 1 |             |
|    |         | 1 |             |
|    |         | 1 | 0.5257      |
|    | 1       | 1 | 0.005894    |
|    | 1       | 1 |             |
|    |         | 1 |             |

VEP annotated somatic variants

|         |   |          |
|---------|---|----------|
|         | 1 |          |
| 0,1     | 1 | 0.1477   |
|         | 1 |          |
|         | 1 | 0.03485  |
|         | 1 | 0.5019   |
|         | 1 | 0.5267   |
| 0,1,1   | 1 | 0.3477   |
|         | 1 | 0.3457   |
| 0,1     | 1 | 0.3471   |
|         | 1 | 0.3537   |
| 1,1,1,1 | 1 | 0.06298  |
|         | 1 | 0.00789  |
|         | 1 |          |
|         | 1 | 0.01144  |
| 1       | 1 | 0.3544   |
|         | 1 | 0.4309   |
| 1       | 1 | 0.153    |
|         | 1 |          |
|         | 1 | 0.7128   |
|         | 1 |          |
| 0,1,1   | 1 | 0.1639   |
|         | 1 | 0.4293   |
|         | 1 | 0.278    |
| 1       | 1 | 0.004033 |
|         | 1 | 0.009962 |
|         | 1 |          |
|         | 1 | 0.6072   |
| 1,1     | 1 | 0.0806   |
|         | 1 | 0.3274   |
|         | 1 |          |
|         | 1 |          |
| 1       | 1 | 0.4835   |
|         | 1 |          |
|         | 1 |          |
|         | 1 | 0.001315 |
|         | 1 | 0.006888 |
|         | 1 | 0.005065 |
|         | 1 | 0.4465   |
|         | 1 |          |
| 0,1     | 1 | 0.2093   |
|         | 1 | 0.02749  |
|         | 1 | 0.02056  |
|         | 1 | 0.3364   |
|         | 1 |          |
|         | 1 | 0.1163   |
|         | 1 | 0.01956  |
|         | 1 |          |
| 1,1     | 1 | 0.7571   |
|         | 1 |          |
|         | 1 | 0.04983  |
|         | 1 |          |
|         | 1 | 0.1627   |
| 0,1,1   | 1 | 0.07839  |
| 0,1     | 1 | 0.2843   |

VEP annotated somatic variants

|    |       |   |         |
|----|-------|---|---------|
|    |       | 1 |         |
|    |       | 1 |         |
|    |       | 1 |         |
|    |       | 1 |         |
|    | 1     | 1 | 0.06982 |
|    |       | 1 | 0.6581  |
|    |       | 1 | 0.02347 |
|    |       | 1 | 0.1612  |
|    | 0,1   | 1 | 0.1397  |
|    |       | 1 |         |
|    |       | 1 | 0.04953 |
|    |       | 1 |         |
|    | 0,1   | 1 | 0.2031  |
|    |       | 1 | 0.4499  |
| 3  |       | 1 |         |
|    | 0,1   | 1 | 0.1508  |
|    |       | 1 |         |
|    |       | 1 | 0.4805  |
|    |       | 1 | 0.734   |
|    |       | 1 |         |
|    |       | 1 |         |
|    |       | 1 | 0.2123  |
|    |       | 1 |         |
|    | 0,1,1 | 1 | 0.02268 |
|    |       | 1 | 0.2687  |
|    |       | 1 |         |
|    |       | 1 | 0.5658  |
|    |       | 1 | 0.04918 |
|    |       | 1 | 0.04484 |
|    |       | 1 | 0.03952 |
|    | 0,1   | 1 | 0.254   |
|    | 0,1   | 1 | 0.3     |
|    | 0,1   | 1 | 0.7387  |
|    | 0,1   | 1 | 0.02133 |
|    |       | 1 | 0.1487  |
|    |       | 1 |         |
|    |       | 1 | 0.1568  |
|    | 0,1   | 1 | 0.2151  |
| 2  |       | 1 |         |
|    |       | 1 | 0.06502 |
| 13 |       | 1 | 0.256   |
|    |       | 1 | 0.2431  |
|    | 0,1   | 1 | 0.1523  |
|    |       | 1 |         |
|    |       | 1 | 0.04708 |
|    |       | 1 | 0.327   |
|    |       | 1 | 0.0224  |
|    |       | 1 |         |
|    | 0,1   | 1 | 0.2535  |
|    | 0,1   | 1 | 0.3082  |
|    |       | 1 |         |

VEP annotated somatic variants

|         |   |             |
|---------|---|-------------|
|         | 1 | 0.1544      |
| 0,1,1,1 | 1 | 0.1333      |
|         | 1 | 0.01137     |
|         | 1 |             |
| 0,1,1   | 1 | 0.1151      |
|         | 1 | 0.2005      |
| 0,1     | 1 | 0.000009418 |
|         | 1 |             |
| 1,0,1,1 | 1 | 0.4983      |
|         | 1 | 0.0074      |
| 0,1     | 1 | 0.4497      |
|         | 1 |             |
| 0,1,1,1 | 1 | 0.2911      |
| 1,1     | 1 | 0.1618      |
|         | 1 |             |
| 0,1     | 1 | 0.3386      |
| 0,1     | 1 | 0.3448      |
|         | 1 |             |
| 1       | 1 | 0.3483      |
| 1       | 1 | 0.3409      |
|         | 1 | 0.2592      |
| 0,1,1   | 1 | 0.2478      |
|         | 1 |             |
|         | 1 | 0.155       |
| 0,1     | 1 | 0.175       |
| 0,1     | 1 | 0.2109      |
|         | 1 |             |
|         | 1 |             |
|         | 1 |             |
|         | 1 |             |
| 0,1,1   | 1 | 0.2159      |
|         | 1 | 0.3893      |
|         | 1 | 0.3452      |
|         | 1 |             |
|         | 1 |             |
| 0,1,1   | 1 | 0.1899      |
|         | 1 | 0.284       |
|         | 1 |             |
|         | 1 | 0.1699      |
|         | 1 | 0.06552     |
|         | 1 | 0.2635      |
|         | 1 |             |
| 0,1     | 1 | 0.3183      |
|         | 1 | 0.4058      |
|         | 1 | 0.1848      |
|         | 1 | 0.4262      |
|         | 1 |             |
|         | 1 |             |
|         | 1 | 0.1252      |
|         | 1 |             |
|         | 1 | 0.08303     |
|         | 1 | 0.4335      |

VEP annotated somatic variants

|    |               |   |        |
|----|---------------|---|--------|
| 1  |               | 1 | 0.218  |
|    | 1,1           | 1 | 0.2656 |
|    |               | 1 |        |
|    |               | 1 | 0.6425 |
|    |               | 1 |        |
|    | 1,1,1,1,1,1,1 | 1 | 0.4092 |
|    | 1,1,1,1,1,1,1 | 1 | 0.326  |
|    | 1             | 1 | 0.2021 |
|    | 1,1,1,1,1,1,1 | 1 | 0.3387 |
|    | 1,1,1,1,1,1,1 | 1 | 0.3978 |
|    | 1,1,1,1,1,1,1 | 1 | 0.4012 |
|    |               | 1 |        |
|    |               | 1 | 0.2372 |
|    |               | 1 | 0.499  |
|    |               | 1 | 0.3469 |
|    |               | 1 |        |
| 31 |               | 1 | 0.2661 |
|    |               | 1 |        |
|    |               | 1 | 0.2461 |
|    |               | 1 |        |
|    | 0,1,1,1       | 1 | 0.2603 |
|    |               | 1 | 0.3492 |
|    | 1,1,1         | 1 | 0.1334 |
|    |               | 1 | 0.1333 |
|    |               | 1 |        |
|    |               | 1 | 0.1173 |
|    |               | 1 |        |
|    | 0,1,1,1,1     | 1 | 0.1639 |
|    | 1,1           | 1 | 0.1095 |
|    | 1,1,1         | 1 | 0.1345 |
|    |               | 1 | 0.5648 |
| 32 | 0,1           | 1 | 0.5154 |
|    |               | 1 | 0.3705 |
|    |               | 1 |        |
| 32 |               | 1 | 0.2837 |
|    |               | 1 | 0.1824 |
|    | 1             | 1 | 0.6116 |
|    |               | 1 | 0.4032 |
|    |               | 1 |        |
|    |               | 1 | 0.6029 |
|    |               | 1 | 0.5971 |
|    |               | 1 | 0.5971 |
|    |               | 1 | 0.1742 |
|    |               | 1 | 0.4524 |
|    |               | 1 | 0.3627 |
|    |               | 1 |        |
|    |               | 1 | 0.2707 |
| 4  |               | 1 | 0.2773 |
|    |               | 1 |        |
|    |               | 1 |        |
|    |               | 1 | 0.0301 |
|    |               | 1 | 0.1412 |
|    |               | 1 |        |
|    |               | 1 |        |

VEP annotated somatic variants

|   |       |   |          |
|---|-------|---|----------|
|   |       | 1 |          |
|   |       | 1 | 0.1113   |
|   |       | 1 |          |
|   |       | 1 | 0.06751  |
|   |       | 1 | 0.1969   |
|   |       | 1 |          |
|   |       | 1 | 0.3682   |
|   |       | 1 |          |
|   |       | 1 | 0.09494  |
|   |       | 1 |          |
|   |       | 1 | 0.5726   |
|   |       | 1 |          |
|   | 0,1   | 1 | 0.2319   |
|   |       | 1 |          |
|   |       | 1 | 0.007636 |
|   |       | 1 |          |
|   |       | 1 | 0.008172 |
|   |       | 1 | 0.007618 |
|   |       | 1 |          |
|   |       | 1 | 0.4327   |
|   |       | 1 | 0.3563   |
|   | 0,1   | 1 | 0.2216   |
|   |       | 1 | 0.2347   |
|   |       | 1 | 0.9422   |
|   |       | 1 |          |
|   |       | 1 | 0.4601   |
| 8 |       | 1 |          |
|   |       | 1 | 0.2916   |
|   | 0,1   | 1 | 0.2336   |
|   | 1     | 1 | 0.3478   |
|   |       | 1 |          |
|   |       | 1 | 0.765    |
|   |       | 1 | 0.2584   |
|   | 0,1   | 1 | 0.6257   |
|   |       | 1 | 0.001015 |
|   |       | 1 | 0.000113 |
|   |       | 1 | 0.4743   |
|   |       | 1 |          |
|   |       | 1 |          |
|   | 0,1   | 1 | 0.3327   |
|   |       | 1 |          |
|   |       | 1 |          |
|   | 0,1   | 1 | 0.1316   |
|   |       | 1 | 0.154    |
|   | 1     | 1 | 0.55     |
|   |       | 1 |          |
|   |       | 1 | 0.5601   |
|   |       | 1 | 0.2822   |
|   | 0,1   | 1 | 0.4996   |
|   |       | 1 |          |
|   | 0,1,1 | 1 | 0.4421   |
| 1 |       | 1 | 0.6803   |
|   |       | 1 | 0.7225   |
|   |       | 1 |          |
|   | 1     | 1 |          |

VEP annotated somatic variants

|       |   |           |
|-------|---|-----------|
|       | 1 |           |
|       | 1 | 0.2985    |
|       | 1 |           |
|       | 1 |           |
|       | 1 |           |
|       | 1 | 0.4035    |
| 1,0,1 | 1 | 0.4949    |
|       | 1 |           |
|       | 1 | 0.4716    |
|       | 1 | 0.00649   |
|       | 1 |           |
|       | 1 |           |
|       | 1 | 0.5132    |
|       | 1 |           |
|       | 1 | 0.312     |
|       | 1 | 0.2284    |
|       | 1 | 0.221     |
|       | 1 |           |
| 0,1   | 1 | 0.4077    |
| 0,1   | 1 | 0.5661    |
|       | 1 |           |
|       | 1 | 0.208     |
| 0,1   | 1 | 0.2548    |
|       | 1 | 0.6495    |
| 0,1   | 1 | 0.6585    |
| 0,1   | 1 | 0.2595    |
|       | 1 | 0.1549    |
|       | 1 | 0.7948    |
|       | 1 | 0.443     |
| 0,1,1 | 1 | 0.08305   |
|       | 1 |           |
|       | 1 | 0.5814    |
| 1,0,1 | 1 | 0.3997    |
| 1,0   | 1 | 0.1579    |
| 1     | 1 | 0.00323   |
|       | 1 | 0.0000377 |
| 1     | 1 | 0.5656    |
|       | 1 |           |
|       | 1 |           |
|       | 1 |           |
|       | 1 |           |
|       | 1 | 0.5143    |
| 1     | 1 | 0.4147    |
|       | 1 |           |
| 0,1   | 1 | 0.3382    |
|       | 1 |           |
|       | 1 |           |
| 0,1,1 | 1 | 0.365     |
|       | 1 |           |
|       | 1 | 0.3874    |
|       | 1 | 0.8906    |
|       | 1 |           |
| 1,1   | 1 | 0.8516    |

VEP annotated somatic variants

|       |  |   |            |
|-------|--|---|------------|
|       |  | 1 | 0.8659     |
|       |  | 1 |            |
|       |  | 1 |            |
|       |  | 1 | 0.0006501  |
|       |  | 1 | 0.003633   |
|       |  | 1 | 0.2077     |
| 1,1   |  | 1 | 0.125      |
|       |  | 1 | 0.3026     |
|       |  | 1 |            |
|       |  | 1 |            |
| 0,1   |  | 1 | 0.2086     |
|       |  | 1 | 0.2128     |
|       |  | 1 |            |
| 0,1   |  | 1 | 0.04482    |
|       |  | 1 | 0.083      |
|       |  | 1 |            |
|       |  | 1 | 0.5252     |
|       |  | 1 | 0.524      |
|       |  | 1 |            |
| 1     |  | 1 |            |
|       |  | 1 |            |
|       |  | 1 |            |
|       |  | 1 |            |
|       |  | 1 |            |
|       |  | 1 |            |
| 0,1   |  | 1 | 0.08316    |
|       |  | 1 |            |
|       |  | 1 | 0.002731   |
| 5     |  | 1 | 0.3184     |
|       |  | 1 | 0.3669     |
|       |  | 1 |            |
|       |  | 1 | 0.02612    |
|       |  | 1 | 0.2453     |
| 0,1   |  | 1 | 0.1826     |
|       |  | 1 |            |
|       |  | 1 | 0.1228     |
|       |  | 1 | 0.5826     |
| 0,1   |  | 1 |            |
|       |  | 1 |            |
|       |  | 1 | 0.2683     |
|       |  | 1 |            |
|       |  | 1 | 0.08478    |
|       |  | 1 | 0.00009245 |
| 0,1   |  | 1 | 0.1449     |
|       |  | 1 |            |
|       |  | 1 | 0.1683     |
| 1,1   |  | 1 | 0.4561     |
|       |  | 1 | 0.1598     |
|       |  | 1 | 0.1573     |
| 1,1,1 |  | 1 | 0.3943     |
|       |  | 1 |            |
|       |  | 1 | 0.7934     |
|       |  | 1 |            |
|       |  | 1 | 0.03341    |



VEP annotated somatic variants

|   |       |   |          |
|---|-------|---|----------|
|   |       | 1 |          |
|   |       | 1 |          |
|   |       | 1 |          |
| 1 |       | 1 |          |
|   |       | 1 |          |
|   |       | 1 | 0.3942   |
|   |       | 1 | 0.7786   |
|   |       | 1 |          |
|   |       | 1 |          |
|   |       | 1 | 0.08884  |
|   |       | 1 |          |
|   |       | 1 | 0.2482   |
|   |       | 1 |          |
|   |       | 1 | 0.1935   |
|   |       | 1 |          |
|   |       | 1 | 0.2603   |
|   |       | 1 |          |
|   |       | 1 | 0.1077   |
|   |       | 1 | 0.4799   |
|   | 0,1   | 1 | 0.08481  |
|   | 0,1   | 1 | 0.5662   |
|   |       | 1 |          |
|   |       | 1 |          |
| 1 |       | 1 |          |
|   | 0,1,1 | 1 | 0.2501   |
|   |       | 1 |          |
|   |       | 1 | 0.008436 |
|   |       | 1 |          |
|   |       | 1 | 0.3628   |
|   |       | 1 | 0.5499   |
|   |       | 1 | 0.08542  |
|   |       | 1 | 0.1663   |
|   |       | 1 |          |
|   |       | 1 |          |
|   | 0,1   | 1 | 0.02811  |
|   | 0,1,1 | 1 | 0.09463  |
|   |       | 1 |          |
|   | 1     | 1 | 0.006544 |
|   |       | 1 | 0.1406   |
|   |       | 1 | 0.3243   |
|   |       | 1 | 0.335    |
|   |       | 1 |          |
|   |       | 1 | 0.01488  |
|   |       | 1 |          |
|   |       | 1 | 0.7823   |
|   |       | 1 |          |
|   |       | 1 | 0.3137   |
| 1 |       | 1 |          |
|   | 0,1   | 1 | 0.1867   |
|   |       | 1 |          |
|   |       | 1 |          |
|   |       | 1 |          |

VEP annotated somatic variants

|         |   |           |
|---------|---|-----------|
|         | 1 | 0.1977    |
|         | 1 | 0.6057    |
|         | 1 | 0.4528    |
|         | 1 |           |
|         | 1 | 0.0005865 |
|         | 1 | 0.2646    |
|         | 1 |           |
|         | 1 |           |
|         | 1 | 0.626     |
|         | 1 |           |
|         | 1 |           |
| 0,1     | 1 | 0.2387    |
| 1,1,1   | 1 | 0.5607    |
|         | 1 |           |
|         | 1 | 0.4301    |
|         | 1 | 0.2406    |
|         | 1 |           |
|         | 1 | 0.2828    |
|         | 1 |           |
| 1,1     | 1 | 0.08281   |
|         | 1 | 0.03084   |
|         | 1 | 0.08721   |
|         | 1 | 0.1475    |
| 0,1,1,1 | 1 | 0.2795    |
|         | 1 | 0.1769    |
|         | 1 |           |
| 0,1     | 1 | 0.2092    |
|         | 1 |           |
|         | 1 |           |
|         | 1 | 0.02139   |
|         | 1 | 0.2923    |
|         | 1 | 0.3555    |
|         | 1 | 0.5139    |
|         | 1 |           |
|         | 1 | 0.007446  |
| 1       | 1 | 0.2225    |
|         | 1 | 0.333     |
|         | 1 |           |
|         | 1 | 0.1042    |
| 0,1     | 1 | 0.1294    |
|         | 1 |           |
|         | 1 |           |
| 0,1     | 1 | 0.3383    |
|         | 1 |           |
|         | 1 |           |
|         | 1 | 0.3059    |
|         | 1 |           |
|         | 1 |           |
| 0,1     | 1 | 0.0236    |
|         | 1 | 0.3417    |
| 0,1     | 1 | 0.5778    |
| 0,1     | 1 | 0.004557  |
|         | 1 | 0.1913    |
|         | 1 |           |

VEP annotated somatic variants

|   |         |   |          |
|---|---------|---|----------|
|   | 0,1     | 1 | 0.6886   |
|   |         | 1 | 0.3925   |
|   |         | 1 | 0.1922   |
|   |         | 1 |          |
|   | 1       | 1 | 0.4256   |
|   |         | 1 |          |
|   |         | 1 |          |
|   |         | 1 |          |
|   | 0,1     | 1 | 0.01119  |
|   |         | 1 | 0.2711   |
|   |         | 1 |          |
|   |         | 1 | 0.001686 |
|   |         | 1 |          |
|   | 0,1,1   | 1 | 0.4173   |
|   |         | 1 |          |
|   | 0,1     | 1 | 0.09745  |
|   |         | 1 |          |
|   |         | 1 |          |
| 1 |         | 1 | 0.1437   |
|   |         | 1 | 0.01739  |
|   |         | 1 |          |
|   |         | 1 | 0.02399  |
|   |         | 1 |          |
|   |         | 1 | 0.5064   |
|   |         | 1 | 0.1935   |
|   |         | 1 | 0.3416   |
| 3 |         | 1 |          |
|   |         | 1 | 0.002156 |
|   |         | 1 | 0.2302   |
|   |         | 1 | 0.6109   |
|   | 0,1     | 1 | 0.3811   |
|   | 0,1,1,1 | 1 | 0.2857   |
|   |         | 1 | 0.2808   |
|   | 0,1     | 1 | 0.2737   |
|   | 1,0,1   | 1 | 0.3768   |
|   | 1,0,1   | 1 | 0.3786   |
|   |         | 1 | 0.164    |
|   |         | 1 | 0.2199   |
|   |         | 1 |          |
|   |         | 1 |          |
|   | 0,1     | 1 | 0.6331   |
|   |         | 1 |          |
|   |         | 1 |          |
|   |         | 1 |          |
|   |         | 1 | 0.2438   |
|   | 1,0     | 1 | 0.06224  |
|   |         | 1 |          |
|   |         | 1 |          |
|   |         | 1 | 0.2518   |
|   |         | 1 |          |
|   |         | 1 | 0.02808  |
|   | 0,1,1   | 1 | 0.009689 |
|   |         | 1 | 0.7207   |

VEP annotated somatic variants

|       |   |            |
|-------|---|------------|
|       | 1 |            |
| 0,1   | 1 | 0.3417     |
|       | 1 | 0.0004854  |
|       | 1 | 0.004879   |
|       | 1 | 0.1785     |
|       | 1 |            |
|       | 1 |            |
|       | 1 | 0.07494    |
|       | 1 | 0.3845     |
|       | 1 |            |
| 1,1   | 1 | 0.1272     |
| 1     | 1 | 0.1265     |
|       | 1 |            |
| 0,1   | 1 | 0.111      |
|       | 1 |            |
|       | 1 | 0.1921     |
|       | 1 | 0.2252     |
| 0,1   | 1 | 0.2688     |
|       | 1 |            |
|       | 1 |            |
|       | 1 | 0.001776   |
|       | 1 | 0.2689     |
|       | 1 | 0.2482     |
|       | 1 |            |
| 0,1,1 | 1 | 0.5111     |
|       | 1 | 0.3933     |
| 0,1   | 1 | 0.244      |
|       | 1 | 0.06265    |
|       | 1 |            |
|       | 1 |            |
|       | 1 |            |
|       | 1 | 0.5798     |
|       | 1 |            |
|       | 1 |            |
|       | 1 | 0.00008032 |
|       | 1 |            |
| 0,1   | 1 | 0.4033     |
|       | 1 | 0.00005649 |
|       | 1 | 0.1751     |
|       | 1 | 0.2542     |
|       | 1 | 0.2713     |
|       | 1 |            |
|       | 1 | 0.7866     |
|       | 1 |            |
| 0,1,1 | 1 | 0.3653     |
|       | 1 | 0.6352     |
|       | 1 |            |
|       | 1 | 0.0008345  |
|       | 1 |            |
| 1     | 1 | 0.01014    |
|       | 1 |            |
| 1     | 1 | 0.02211    |
| 0,1   | 1 | 0.6781     |

VEP annotated somatic variants

|       |   |          |
|-------|---|----------|
|       | 1 |          |
|       | 1 |          |
|       | 1 |          |
|       | 1 |          |
|       | 1 |          |
|       | 1 |          |
|       | 1 | 0.7352   |
|       | 1 |          |
|       | 1 |          |
|       | 1 |          |
|       | 1 |          |
|       | 1 | 0.0058   |
| 0,1   | 1 | 0.08962  |
|       | 1 |          |
|       | 1 | 0.3322   |
| 0,1   | 1 | 0.6581   |
|       | 1 |          |
|       | 1 |          |
| 0,1   | 1 | 0.344    |
|       | 1 | 0.3546   |
| 0,1   | 1 | 0.6641   |
|       | 1 | 0.6013   |
|       | 1 | 0.5113   |
|       | 1 | 0.01025  |
|       | 1 | 0.001487 |
|       | 1 |          |
|       | 1 |          |
| 0,1   | 1 | 0.04712  |
|       | 1 |          |
|       | 1 |          |
| 1,1,1 | 1 | 0.1087   |
|       | 1 | 0.4687   |
| 0,1   | 1 | 0.2118   |
|       | 1 | 0.1689   |
|       | 1 | 0.1642   |
|       | 1 |          |
|       | 1 | 0.07038  |
|       | 1 |          |
|       | 1 | 0.004317 |
|       | 1 |          |
|       | 1 | 0.00731  |
| 0,1   | 1 | 0.3746   |
| 0,1   | 1 | 0.329    |
|       | 1 |          |
|       | 1 |          |
|       | 1 | 0.3085   |
| 0,1   | 1 | 0.3415   |
| 0,1   | 1 | 0.5435   |
|       | 1 | 0.04043  |
|       | 1 | 0.2149   |
|       | 1 | 0.5765   |
|       | 1 | 0.2154   |
|       | 1 | 0.08482  |
|       | 1 |          |

VEP annotated somatic variants

|       |   |             |
|-------|---|-------------|
|       | 1 | 0.02324     |
|       | 1 | 0.000009415 |
| 0,1   | 1 | 0.5676      |
|       | 1 |             |
|       | 1 | 0.08619     |
| 1     | 1 | 0.1421      |
|       | 1 |             |
|       | 1 |             |
|       | 1 | 0.2152      |
|       | 1 | 0.09412     |
|       | 1 |             |
| 0,1,1 | 1 | 0.5965      |
| 0,1   | 1 | 0.05295     |
|       | 1 | 0.1201      |
|       | 1 |             |
|       | 1 | 0.4803      |
|       | 1 |             |
| 0,1   | 1 | 0.4279      |
|       | 1 |             |
|       | 1 | 0.5388      |
|       | 1 | 0.1257      |
| 1,1   | 1 | 0.2979      |
|       | 1 | 0.1779      |
| 0,1   | 1 | 0.4009      |
|       | 1 |             |
| 0,1,1 | 1 | 0.3875      |
| 0,1,1 | 1 | 0.5715      |
| 0,1   | 1 | 0.5574      |
|       | 1 | 0.06103     |
|       | 1 | 0.2859      |
|       | 1 | 0.007843    |
| 0,1   | 1 | 0.3934      |
| 0,1   | 1 | 0.3011      |
|       | 1 | 0.7523      |
|       | 1 |             |
|       | 1 | 0.2741      |
|       | 1 | 0.3903      |

VEP annotated somatic variants

| ExAC_AF_AFR | ExAC_AF_AMR | ExAC_AF_EAS | ExAC_AF_FIN |
|-------------|-------------|-------------|-------------|
| 0.005518    | 0.05396     | 0.0002543   | 0.04989     |
| 0.3205      | 0.5774      | 0.2962      | 0.6317      |
| 0.283       | 0.5403      | 0.2691      | 0.5682      |
| 0.7394      | 0.6357      | 0.3062      | 0.6405      |
| 0           | 0           | 0           | 0           |
| 0.7128      | 0.3869      | 0.08743     | 0.1535      |
| 0.2816      | 0.1429      | 0.05769     | 0.01307     |
| 0.114       | 0.28        | 0.1495      | 0.1951      |
| 0.9187      | 0.7993      | 0.8693      | 0.7889      |
| 0.01206     | 0.05562     | 0           | 0.0618      |
| 0           | 0           | 0           | 0           |
| 0.02538     | 0.01347     | 0.04009     | 0.0472      |
| 0.4397      | 0.6584      | 0.5211      | 0.6358      |
| 0.2429      | 0.2155      | 0.03117     | 0.3747      |
| 0.203       | 0.08012     | 0.005227    | 0.1727      |
| 0.07022     | 0.319       | 0.2173      | 0.4053      |
| 0.4207      | 0.6319      | 0.4396      | 0.5312      |
| 0           | 0           | 0           | 0           |
| 0.6018      | 0.7981      | 0.9054      | 0.5666      |
| 0.1224      | 0.01141     | 0.08502     | 0.005888    |
| 0.2535      | 0.3136      | 0.317       | 0.1323      |
| 0.0121      | 0.02817     | 0.02817     | 0           |
| 0.6516      | 0.1498      | 0.09091     | 0.1582      |
| 0.5557      | 0.7123      | 0.5801      | 0.531       |
| 0.005248    | 0.015       | 0           | 0.02983     |
| 0.406       | 0.3476      | 0.4178      | 0.3444      |
| 0.2016      | 0.5565      | 0.7035      | 0.5745      |
| 0.2538      | 0.3322      | 0.4329      | 0.152       |
| 0.2084      | 0.3152      | 0.3165      | 0.373       |
| 0.002992    | 0.002944    | 0           | 0.01092     |
| 0.04422     | 0.1825      | 0.1029      | 0.2593      |
| 0.4951      | 0.339       | 0.2118      | 0.4016      |
| 0.8157      | 0.8086      | 0.9534      | 0.7995      |

VEP annotated somatic variants

|          |         |           |         |
|----------|---------|-----------|---------|
| 0.2194   | 0.1535  | 0.002575  | 0.2597  |
| 0.04101  | 0.2663  | 0.5322    | 0.1865  |
| 0.05543  | 0.02803 | 0.124     | 0.06819 |
| 0.9041   | 0.7806  | 0.6799    | 0.7489  |
| 0.1102   | 0.3415  | 0.3245    | 0.3223  |
| 0.1093   | 0.2993  | 0.06104   | 0.3316  |
| 0.482    | 0.2441  | 0.2557    | 0.2102  |
| 0.3004   | 0.2126  | 0.5063    | 0.2215  |
| 0.1627   | 0.243   | 0.2243    | 0.2283  |
| 0.8586   | 0.7329  | 0.9904    | 0.9086  |
| 0.3226   | 0.2922  | 0.586     | 0.1323  |
| 0.01812  | 0.04372 | 0         | 0.2248  |
| 0.008325 | 0.05328 | 0.02734   | 0.05397 |
| 0        | 0       | 0         | 0       |
| 0.214    | 0.2322  | 0.05783   | 0.3261  |
| 0.2645   | 0.2394  | 0.05893   | 0.3302  |
| 0.005927 | 0.1108  | 0.001273  | 0.07666 |
| 0.01125  | 0.04369 | 0.06217   | 0.1021  |
| 0.416    | 0.1971  | 0.1183    | 0.31    |
| 0.3537   | 0.3838  | 0.1258    | 0.1095  |
| 0.01825  | 0.01883 | 0         | 0.1625  |
| 0.528    | 0.5275  | 0.4233    | 0.2845  |
| 0.04555  | 0.2207  | 0.7087    | 0.2152  |
| 0.01325  | 0.02796 | 0         | 0.07357 |
| 0.8551   | 0.6134  | 0.4054    | 0.7117  |
| 0.7768   | 0.6095  | 0.4037    | 0.699   |
| 0.2857   | 0.5     | 0.4019    | 0.5     |
| 0.07938  | 0.09383 | 0.0003821 | 0.1782  |
| 0.2687   | 0.1372  | 0.1926    | 0.2578  |
| 0.01404  | 0.02806 | 0.0001277 | 0.07578 |
| 0.3084   | 0.21    | 0.0938    | 0.2528  |
| 0.02414  | 0.01897 | 0         | 0.08154 |



VEP annotated somatic variants

|          |           |           |         |
|----------|-----------|-----------|---------|
| 0.3743   | 0.403     | 0.2557    | 0.6351  |
| 0.2147   | 0.5242    | 0.6244    | 0.4998  |
| 0.7854   | 0.8263    | 0.9811    | 0.6289  |
| 0.2983   | 0.26      | 0.0242    | 0.141   |
| 0.02555  | 0.02506   | 0         | 0.03826 |
| 0.0724   | 0.01368   | 0.0001363 | 0.03082 |
| 0.02041  | 0.1366    | 0.05392   | 0.1622  |
| 0.2629   | 0.3678    | 0.7054    | 0.4289  |
| 0.1597   | 0.06786   | 0.07738   | 0.0443  |
| 0.3548   | 0.1631    | 0.2739    | 0.2442  |
| 0.1928   | 0.287     | 0.1058    | 0.3257  |
| 0.4728   | 0.2168    | 0.31      | 0.4205  |
| 0.2167   | 0.1329    | 0.3213    | 0.1338  |
| 0.9682   | 0.9696    | 0.9996    | 0.9439  |
| 0.1785   | 0.6118    | 0.5122    | 0.4427  |
| 0.3009   | 0.2635    | 0.04627   | 0.3807  |
| 0.6152   | 0.1997    | 0.2035    | 0.3462  |
| 0.8836   | 0.8035    | 0.4901    | 0.8349  |
| 0.5714   | 0.4959    | 0.6534    | 0.2859  |
| 0.03745  | 0.0609    | 0.05467   | 0.09811 |
| 0.2293   | 0.3171    | 0.001169  | 0.236   |
| 0.01343  | 0.04826   | 0         | 0.1815  |
| 0.001558 | 0.0002944 | 0         | 0.00157 |
| 0.03489  | 0.05358   | 0.0001493 | 0.2115  |
| 0.3026   | 0.1555    | 0.02998   | 0.2139  |
| 0.04308  | 0.009901  | 0.04124   | 0       |
| 0.2964   | 0.2097    | 0.3654    | 0.1667  |
| 0.02315  | 0.05386   | 0.1637    | 0.0904  |
| 0.5747   | 0.8325    | 0.7796    | 0.7962  |
| 0.3077   | 0.2172    | 0.2288    | 0.3286  |

VEP annotated somatic variants

|           |           |           |          |
|-----------|-----------|-----------|----------|
| 0.1763    | 0.3651    | 0.3889    | 0.4858   |
| 0.008385  | 0.03768   | 0.0001271 | 0.03901  |
| 0.4243    | 0.4133    | 0.2239    | 0.2701   |
| 0.266     | 0.0838    | 0.07718   | 0.09739  |
| 0.6954    | 0.5044    | 0.7336    | 0.3147   |
| 0.6007    | 0.4585    | 0.9849    | 0.5146   |
| 0.1915    | 0.3904    | 0.4852    | 0.3242   |
| 0.03424   | 0.1569    | 0.1129    | 0.2267   |
| 0.3954    | 0.2931    | 0.4038    | 0.1062   |
| 0.06865   | 0.214     | 0.2446    | 0.1739   |
| 0.3197    | 0.4805    | 0.5752    | 0.1643   |
| 0.7053    | 0.8205    | 0.838     | 0.575    |
| 0.03184   | 0.06546   | 0.038     | 0.04459  |
| 0.5932    | 0.1244    | 0.2329    | 0.1544   |
| 0.732     | 0.3542    | 0.3786    | 0.3171   |
| 0.2044    | 0.2738    | 0.3774    | 0.2176   |
| 0.005032  | 0.02437   | 0         | 0.02849  |
| 0.0007723 | 0.0004462 | 0.0001272 | 0.004386 |
| 0.5717    | 0.1289    | 0.6625    | 0.1449   |
| 0.02478   | 0.06996   | 0.06261   | 0.15     |
| 0.0009434 | 0.01212   | 0         | 0.004202 |
| 0.4324    | 0.1529    | 0.01977   | 0.1788   |
| 0.0845    | 0.08688   | 0.0005101 | 0.1343   |
| 0.0003804 | 0.0004523 | 0         | 0.07027  |
| 0.2133    | 0.1413    | 0.1447    | 0.2509   |
| 0.1977    | 0.2497    | 0.4667    | 0.3788   |
| 0.02275   | 0.04339   | 0.001278  | 0.1121   |
| 0.003274  | 0.007191  | 0.000128  | 0.03172  |
| 0.3124    | 0.399     | 0.1037    | 0.5495   |
| 0.1076    | 0.5075    | 0.5375    | 0.3304   |

VEP annotated somatic variants

|           |            |           |           |
|-----------|------------|-----------|-----------|
| 0.3679    | 0.2186     | 0.1989    | 0.3181    |
| 0.0005919 | 0.0002699  | 0         | 0.001211  |
| 0.0007766 | 0.00009051 | 0         | 0.0003031 |
| 0.2399    | 0.08713    | 0.0001894 | 0.1608    |
| 0.08733   | 0.08493    | 0.04643   | 0.217     |
| 0.09789   | 0.06446    | 0.2062    | 0.2312    |
| 0.0327    | 0.1501     | 0         | 0.1773    |
| 0.4704    | 0.5098     | 0.3973    | 0.2989    |
| 0.1239    | 0.2375     | 0.04336   | 0.3299    |
| 0.3672    | 0.686      | 0.5073    | 0.5975    |
| 0.2901    | 0.2894     | 0.4478    | 0.1509    |
| 0.007326  | 0.04896    | 0         | 0.04359   |
| 0.08011   | 0.3665     | 0.3068    | 0.4413    |
| 0.5651    | 0.843      | 0.978     | 0.6948    |
| 0         | 0          | 0         | 0         |
| 0.005213  | 0.01702    | 0.0001276 | 0.0193    |
| 0.2209    | 0.1052     | 0.1534    | 0.1686    |
| 0.3062    | 0.04545    | 0         | 0         |
| 0.1556    | 0.2102     | 0.2857    | 0.3158    |
| 0.5707    | 0.449      | 0.5108    | 0.3971    |
| 0.1297    | 0.2607     | 0.4926    | 0.1163    |
| 0.2037    | 0.3026     | 0.2471    | 0.2941    |
| 0.2868    | 0.381      | 0.3887    | 0.2768    |
| 0.02846   | 0.04191    | 0.0003815 | 0.05095   |
| 0.5945    | 0.8511     | 0.8305    | 0.7284    |
| 0.5942    | 0.8065     | 0.9524    | 0.6314    |
| 0.6325    | 0.8479     | 0.9511    | 0.5582    |
| 0.2423    | 0.1145     | 0.01915   | 0.3512    |
| 0.06099   | 0.07491    | 0.1427    | 0.2271    |
| 0.4422    | 0.5746     | 0.5517    | 0.5063    |

VEP annotated somatic variants

|          |          |           |           |
|----------|----------|-----------|-----------|
| 0.0359   | 0.05462  | 0.002543  | 0.1175    |
| 0.2784   | 0.07784  | 0.09557   | 0.0818    |
| 0.4068   | 0.3226   | 0.3857    | 0.5417    |
| 0.1155   | 0.2118   | 0.4945    | 0.4151    |
| 0.9803   | 0.7375   | 0.4979    | 0.8309    |
| 0.006184 | 0.007757 | 0.0001271 | 0.08074   |
| 0.4279   | 0.09727  | 0.09883   | 0.1532    |
| 0.5519   | 0.3741   | 0.2481    | 0.2287    |
| 0.03395  | 0.1375   | 0.4523    | 0.1113    |
| 0.8228   | 0.9414   | 0.8679    | 0.9244    |
| 0.6085   | 0.3103   | 0.5895    | 0.2612    |
| 0.05956  | 0.1317   | 0.06649   | 0.3044    |
| 0.4138   | 0.2643   | 0.3269    | 0.3961    |
| 0.1436   | 0.3687   | 0.3266    | 0.261     |
| 0.004006 | 0.006535 | 0         | 0.01141   |
| 0.5707   | 0.4669   | 0.5857    | 0.349     |
| 0.1133   | 0.255    | 0.3692    | 0.2886    |
| 0.3594   | 0.3797   | 0.2346    | 0.3863    |
| 0.242    | 0.6433   | 0.6114    | 0.1532    |
| 0.3783   | 0.7811   | 0.6701    | 0.5115    |
| 0.2003   | 0.1922   | 0.3239    | 0.3061    |
| 0.4157   | 0.09732  | 0.0102    | 0.108     |
| 0.08782  | 0.04428  | 0.0003819 | 0.06804   |
| 0.1095   | 0.3657   | 0.3551    | 0.75      |
| 0.001103 | 0.003927 | 0.0001272 | 0.0003025 |
| 0.2071   | 0.05773  | 0.1754    | 0.1471    |
| 0.001656 | 0.0034   | 0         | 0.003481  |
| 0.4545   | 0.4583   | 0.7292    | 0         |
| 0.3666   | 0.3341   | 0.6916    | 0.7104    |

VEP annotated somatic variants

|          |          |         |         |
|----------|----------|---------|---------|
| 0.3117   | 0.4147   | 0.2767  | 0.5251  |
| 0.1525   | 0.3248   | 0.3946  | 0.4423  |
| 0.06757  | 0.2344   | 0.1343  | 0.3571  |
| 0.8064   | 0.3844   | 0.5388  | 0.3173  |
| 0.04902  | 0.2903   | 0.3085  | 0.2864  |
| 0.01169  | 0.02554  | 0.02044 | 0.05049 |
| 0.4949   | 0.3889   | 0.3984  | 0       |
| 0.001894 | 0.002586 | 0       | 0.01104 |

|        |        |           |        |
|--------|--------|-----------|--------|
| 0      | 0      | 0         | 0      |
| 0.636  | 0.3682 | 0.5737    | 0.7052 |
| 0.6182 | 0.3369 | 0.5447    | 0.6891 |
| 0.1696 | 0.1055 | 0.0008899 | 0.1464 |

|        |        |        |        |
|--------|--------|--------|--------|
| 0.3622 | 0.1964 | 0.0173 | 0.2732 |
| 0.7704 | 0.419  | 0.5713 | 0.4587 |
| 0.2186 | 0.3045 | 0.4416 | 0.251  |

|        |        |        |        |
|--------|--------|--------|--------|
| 0.4868 | 0.6114 | 0.5998 | 0.6718 |
|--------|--------|--------|--------|

|        |         |        |         |
|--------|---------|--------|---------|
| 0.2507 | 0.09823 | 0.1478 | 0.09433 |
|--------|---------|--------|---------|

|         |         |         |         |
|---------|---------|---------|---------|
| 0.09011 | 0.1625  | 0.03779 | 0.4062  |
| 0.1329  | 0.08659 | 0.05048 | 0.06879 |

|        |        |        |        |
|--------|--------|--------|--------|
| 0.5032 | 0.1262 | 0.2155 | 0.3462 |
|--------|--------|--------|--------|

|         |         |       |        |
|---------|---------|-------|--------|
| 0.6796  | 0.669   | 0.814 | 0.4418 |
| 0.02278 | 0.05837 | 0     | 0.1284 |

|        |       |        |       |
|--------|-------|--------|-------|
| 0.2197 | 0.591 | 0.4945 | 0.216 |
|--------|-------|--------|-------|

|        |        |        |        |
|--------|--------|--------|--------|
| 0      | 0      | 0      | 0      |
| 0.2016 | 0.4757 | 0.3797 | 0.5657 |

|        |        |        |        |
|--------|--------|--------|--------|
| 0.5485 | 0.2522 | 0.4861 | 0.4209 |
| 0.3384 | 0.2556 | 0.2578 | 0.5    |

|        |        |        |        |
|--------|--------|--------|--------|
| 0.1476 | 0.2294 | 0.3178 | 0.2748 |
| 0      | 0      | 0      | 0      |

|          |          |        |          |
|----------|----------|--------|----------|
| 0.7862   | 0.5174   | 0.3015 | 0.5824   |
| 0.001228 | 0.001966 | 0      | 0.001521 |

VEP annotated somatic variants

|          |          |           |         |
|----------|----------|-----------|---------|
| 0.02603  | 0.3229   | 0.223     | 0.1814  |
| 0.4596   | 0.4795   | 0.4224    | 0.6176  |
| 0.1478   | 0.408    | 0.4467    | 0.4118  |
| 0.006667 | 0.02397  | 0.01887   | 0.07143 |
| 0.07271  | 0.1959   | 0.2005    | 0.3229  |
| 0.01515  | 0.01564  | 0.005544  | 0.09559 |
| 0.005647 | 0.009045 | 0.002307  | 0.04966 |
| 0.2249   | 0.06823  | 0.1495    | 0.02601 |
| 0.1177   | 0.4649   | 0.3484    | 0.3322  |
| 0.9306   | 0.7908   | 0.9149    | 0.6467  |
| 0.09204  | 0.08771  | 0.01263   | 0.1229  |
| 0.009828 | 0.01883  | 0.06779   | 0.03538 |
| 0.3287   | 0.2491   | 0.2629    | 0.411   |
| 0.3266   | 0.2328   | 0.268     | 0.4108  |
| 0.1384   | 0.2239   | 0.2304    | 0.2809  |
| 0.6946   | 0.6225   | 0.8858    | 0.7049  |
| 0.1295   | 0.06083  | 0.1303    | 0.1402  |
| 0.00445  | 0.0194   | 0.0001501 | 0.01369 |
| 0.003756 | 0.006109 | 0         | 0.03116 |
| 0.1469   | 0.3019   | 0.2572    | 0.2146  |
| 0.7401   | 0.5755   | 0.4601    | 0.374   |
| 0.4238   | 0.2996   | 0.04416   | 0.1967  |
| 0.03059  | 0.04947  | 0.0003818 | 0.08832 |
| 0.01324  | 0.01783  | 0         | 0.07789 |
| 0.2429   | 0.4521   | 0.3144    | 0.516   |
| 0.02276  | 0.06353  | 0.000647  | 0.08455 |
| 0.08722  | 0.5436   | 0.5538    | 0.5354  |
| 0.06194  | 0.1935   | 0.4324    | 0.2594  |

VEP annotated somatic variants

|          |          |           |         |
|----------|----------|-----------|---------|
| 0.04062  | 0.1748   | 0.01006   | 0.2538  |
| 0.8292   | 0.6468   | 0.5792    | 0.623   |
| 0.1685   | 0.6174   | 0.4142    | 0.6833  |
| 0.06711  | 0.3573   | 0.1186    | 0.2633  |
| 0.4672   | 0.732    | 0.3514    | 0.4136  |
| 0.5133   | 0.5677   | 0.3434    | 0.3884  |
| 0.6194   | 0.7141   | 0.3475    | 0.4003  |
| 0.684    | 0.5666   | 0.7213    | 0.2572  |
| 0.8835   | 0.6527   | 0.5494    | 0.6478  |
| 0.6661   | 0.5832   | 0.5433    | 0.552   |
| 0.6669   | 0.5834   | 0.5438    | 0.5534  |
| 0.03821  | 0.2788   | 0.07024   | 0.1034  |
| 0.003756 | 0.004823 | 0.0001273 | 0.02165 |
| 0.4744   | 0.04611  | 0.02042   | 0.08057 |
| 0.3462   | 0.08035  | 0.1249    | 0.1576  |
| 0.08011  | 0.0443   | 0.001017  | 0.08119 |
| 0.1028   | 0.6072   | 0.5849    | 0.4716  |
| 0.01462  | 0.03103  | 0.05379   | 0.1339  |
| 0.5128   | 0.3173   | 0.2938    | 0.6386  |
| 0.25     | 0.1831   | 0.1947    | 0.6562  |
| 0.2207   | 0.5813   | 0.4575    | 0.5364  |
| 0.005296 | 0.01694  | 0.0001271 | 0.01935 |
| 0.4775   | 0.3642   | 0.1897    | 0.408   |
| 0.1616   | 0.06194  | 0.0009709 | 0.2164  |
| 0.6602   | 0.1878   | 0.05027   | 0.1616  |
| 0.1441   | 0.1512   | 0.05009   | 0.1367  |
| 0.5927   | 0.4747   | 0.3361    | 0.179   |
| 0.04445  | 0.3713   | 0.1324    | 0.1369  |
| 0.07708  | 0.5631   | 0.3081    | 0.124   |
| 0.3215   | 0.2353   | 0.5238    | 0.4756  |
| 0.7589   | 0.3612   | 0.4889    | 0.2411  |
| 0.7602   | 0.5961   | 0.5934    | 0.6955  |
| 0.3073   | 0.3261   | 0.2521    | 0.4877  |
| 0.1102   | 0.1289   | 0.009098  | 0.1414  |
| 0.00189  | 0.00437  | 0         | 0.02753 |
| 0.0327   | 0.1568   | 0.03221   | 0.137   |

VEP annotated somatic variants

|           |         |           |           |
|-----------|---------|-----------|-----------|
| 0.5721    | 0.6379  | 0.8773    | 0.6987    |
| 0.2393    | 0.4602  | 0.1691    | 0.3646    |
| 0.7461    | 0.9068  | 0.7967    | 0.8254    |
| 0.1977    | 0.4172  | 0.7081    | 0.4153    |
| 0.004376  | 0.01716 | 0         | 0.00984   |
| 0.8667    | 0.8256  | 0.6866    | 0.6963    |
| 0.8722    | 0.8267  | 0.6868    | 0.6955    |
| 0.3705    | 0.3236  | 0.5605    | 0.4187    |
| 0.09869   | 0.1114  | 0.4075    | 0.2672    |
| 0.04012   | 0.09506 | 0.002697  | 0.2181    |
| 0.05273   | 0.09285 | 0.05103   | 0.2204    |
| 0.0005214 | 0       | 0.0002552 | 0.0003644 |
| 0.01616   | 0.07024 | 0.0002621 | 0.1629    |
| 0.2165    | 0.1649  | 0.2338    | 0.3127    |
| 0.31      | 0.4618  | 0.4293    | 0.396     |
| 0.549     | 0.6123  | 0.7638    | 0.3288    |
| 0.132     | 0.4344  | 0.4478    | 0.3358    |
| 0.7665    | 0.4751  | 0.8117    | 0.6195    |
| 0.1817    | 0.5035  | 0.3021    | 0.277     |
| 0.007444  | 0.01333 | 0.0002728 | 0.003579  |
| 0.01197   | 0.1779  | 0.08212   | 0.04215   |
| 0.5532    | 0.2329  | 0.6502    | 0.2066    |
| 0.003093  | 0.00333 | 0.0001664 | 0.06226   |
| 0.07732   | 0.2991  | 0.204     | 0.04354   |
| 0.2477    | 0.4205  | 0.3973    | 0.45      |
| 0.5568    | 0.6826  | 0.5907    | 0.7351    |
| 0.3452    | 0.6831  | 0.2406    | 0.7495    |
| 0.1577    | 0.2231  | 0.2365    | 0.1559    |
| 0.8536    | 0.7286  | 0.7026    | 0.7924    |



VEP annotated somatic variants

|          |          |           |          |
|----------|----------|-----------|----------|
| 0.1825   | 0.5121   | 0.3461    | 0.4517   |
| 0.1899   | 0.2029   | 0.0006373 | 0.3019   |
| 0.1082   | 0.4678   | 0.2676    | 0.4145   |
| 0.2853   | 0.4212   | 0.05921   | 0.3382   |
| 0.001774 | 0.005534 | 0         | 0.001815 |
| 0.849    | 0.5932   | 0.6821    | 0.496    |
| 0.2919   | 0.3218   | 0.3027    | 0.4215   |
| 0.3304   | 0.5773   | 0.627     | 0.6126   |
| 0.3549   | 0.2509   | 0.2952    | 0.4341   |
| 0.2326   | 0.6902   | 0.7594    | 0.529    |
| 0.005982 | 0.01244  | 0         | 0.02654  |
| 0.2351   | 0.2521   | 0.2571    | 0.3857   |
| 0.1561   | 0.1691   | 0.2155    | 0.2792   |
| 0.4732   | 0.4316   | 0.3774    | 0.358    |
| 0.2846   | 0.4449   | 0.3796    | 0.3943   |
| 0.2544   | 0.0206   | 0.03992   | 0.06955  |
| 0.1689   | 0.01694  | 0.0002543 | 0.06955  |
| 0.0498   | 0.1871   | 0.2535    | 0.1943   |
| 0.05009  | 0.187    | 0.2604    | 0.1943   |
| 0.1065   | 0.1667   | 0.16      | 0.3571   |
| 0.02973  | 0.05145  | 0.01578   | 0.1538   |
| 0.1403   | 0.2837   | 0.527     | 0.3044   |
| 0.2075   | 0.05048  | 0.007459  | 0.06018  |
| 0.05182  | 0.2208   | 0.1349    | 0.3763   |
| 0.1346   | 0.2201   | 0.4184    | 0.2083   |
| 0.01072  | 0.1506   | 0.2874    | 0.06214  |
| 0.01724  | 0.2227   | 0.01929   | 0.203    |
| 0.001138 | 0.007825 | 0         | 0.001038 |
| 0.1446   | 0.3916   | 0.004577  | 0.4244   |
| 0.06541  | 0.1369   | 0.1677    | 0.1178   |
| 0.2697   | 0.224    | 0.1856    | 0.3131   |
| 0.6983   | 0.4558   | 0.6315    | 0.4135   |
| 0.9948   | 0.992    | 1         | 0.9212   |
| 0.04331  | 0.06043  | 0         | 0.1106   |
| 0.02037  | 0.1779   | 0.3194    | 0.1116   |
| 0.1505   | 0.3667   | 0.3718    | 0.2652   |
| 0.05422  | 0.1294   | 0.07949   | 0.2281   |
| 0.1065   | 0.0882   | 0.005962  | 0.02719  |
| 0.312    | 0.2583   | 0.1906    | 0.209    |

VEP annotated somatic variants

|           |          |           |           |
|-----------|----------|-----------|-----------|
| 0.2222    | 0.2012   | 0.2671    | 0.1836    |
| 0.1053    | 0.06893  | 0.2733    | 0.07607   |
| 0.7113    | 0.3681   | 0.5698    | 0.5171    |
| 0.06202   | 0.1323   | 0.3642    | 0.5242    |
| 0.7718    | 0.5474   | 0.7116    | 0.5562    |
| 0.2467    | 0.4364   | 0.6085    | 0.3059    |
| 0.2612    | 0.3948   | 0.5097    | 0.1914    |
| 0.2325    | 0.2249   | 0.3356    | 0.1141    |
| 0.1003    | 0.2817   | 0.1751    | 0.2871    |
| 0.114     | 0.1667   | 0.1293    | 0         |
| 0.4982    | 0.8112   | 0.8198    | 0.644     |
| 0.05161   | 0.1622   | 0         | 0.3647    |
| 0.07712   | 0.2872   | 0.1572    | 0.433     |
| 0.1567    | 0.0288   | 0.0003377 | 0.01955   |
| 0.2828    | 0.1776   | 0.1517    | 0.2769    |
| 0.02083   | 0.01389  | 0         | 0.1667    |
| 0.03575   | 0.08213  | 0.0006593 | 0.1625    |
| 0.553     | 0.7518   | 0.5433    | 0.6805    |
| 0.2901    | 0.2793   | 0.4009    | 0.4193    |
| 0.8328    | 0.8633   | 0.9553    | 0.7545    |
| 0.009572  | 0.02695  | 0         | 0.04902   |
| 0.7543    | 0.6633   | 0.6459    | 0.5774    |
| 0.01238   | 0.01975  | 0.0004009 | 0.0114    |
| 0.06379   | 0.1173   | 0.1391    | 0.01391   |
| 0.0648    | 0.1167   | 0.1385    | 0.01378   |
| 0.3496    | 0.3846   | 0.3402    | 0.516     |
| 0.5887    | 0.4392   | 0.8209    | 0.4896    |
| 0.04405   | 0.06829  | 0.0748    | 0.1348    |
| 0.02713   | 0.09488  | 0.03407   | 0.1031    |
| 0.0005515 | 0.001427 | 0         | 0.0001512 |
| 0.06109   | 0.006957 | 0.02505   | 0.01119   |
| 0.259     | 0.3253   | 0.2742    | 0.4642    |
| 0.7976    | 0.5742   | 0.546     | 0.5634    |

VEP annotated somatic variants

|           |          |           |          |
|-----------|----------|-----------|----------|
| 0.1815    | 0.4683   | 0.7345    | 0.3979   |
| 0.02032   | 0.4214   | 0.03767   | 0.2132   |
| 0.3254    | 0.3208   | 0.3337    | 0.3824   |
| 0.1673    | 0.1926   | 0.1696    | 0.3529   |
| 0.1495    | 0.573    | 0.5377    | 0.5997   |
| 0.2446    | 0.4182   | 0.2359    | 0.1988   |
| 0.1723    | 0.05911  | 0.01809   | 0.08772  |
| 0.1569    | 0.05651  | 0.1823    | 0.115    |
| 0.02128   | 0.0781   | 0.1548    | 0.1389   |
| 0.209     | 0.2025   | 0.3931    | 0.2641   |
| 0.08813   | 0.515    | 0.5277    | 0.5777   |
| 0         | 0        | 0         | 0        |
| 0.3437    | 0.2428   | 0.1697    | 0.2871   |
| 0.6314    | 0.3241   | 0.4724    | 0.2335   |
| 0.445     | 0.8687   | 0.6546    | 0.7823   |
| 0.1908    | 0.4873   | 0.5809    | 0.3897   |
| 0.09712   | 0.3675   | 0.4094    | 0.2353   |
| 0.5414    | 0.4108   | 0.6953    | 0.5103   |
| 0.4343    | 0.2835   | 0.001492  | 0.3545   |
| 0.3599    | 0.3132   | 0.1374    | 0.07106  |
| 0.6322    | 0.3785   | 0.2108    | 0.07211  |
| 0.1336    | 0.03372  | 0         | 0.05745  |
| 0.09753   | 0.4123   | 0.4477    | 0.3969   |
| 0.6597    | 0.6554   | 0.9152    | 0.3593   |
| 0.0009929 | 0.000535 | 0         | 0.002874 |
| 0.1093    | 0.193    | 0.04063   | 0.1894   |
| 0.1899    | 0.2527   | 0.2455    | 0.3174   |
| 0.2092    | 0.2516   | 0.2397    | 0.3162   |
| 0.0105    | 0.02573  | 0.0001564 | 0.03411  |
| 0.1712    | 0.3096   | 0.4103    | 0.2977   |
| 0.002135  | 0.007006 | 0         | 0.021    |

VEP annotated somatic variants

|           |           |           |          |
|-----------|-----------|-----------|----------|
| 0.6957    | 0.5535    | 0.447     | 0.5884   |
| 0.02139   | 0.2588    | 0.2707    | 0.09591  |
| 0.376     | 0.2158    | 0.2384    | 0.2597   |
| 0.2019    | 0.4894    | 0.3151    | 0.255    |
| 0.9308    | 0.768     | 1         | 0.898    |
| 0.0006711 | 0.001877  | 0         | 0.02756  |
| 0.001923  | 0.0008133 | 0         | 0.02245  |
| 0.02694   | 0.04263   | 0.0005148 | 0.2188   |
| 0.7267    | 0.4155    | 0.5698    | 0.6075   |
| 0.7183    | 0.8839    | 0.9449    | 0.7634   |
| 0.0234    | 0.06259   | 0.06041   | 0.07801  |
| 0.1422    | 0.2318    | 0.3316    | 0.2839   |
| 0.07748   | 0.2102    | 0.3016    | 0.2545   |
| 0.2994    | 0.3074    | 0.2805    | 0.401    |
| 0.1805    | 0.2058    | 0.1277    | 0.3414   |
| 0.3192    | 0.3176    | 0.165     | 0.4873   |
| 0.5847    | 0.7079    | 0.8006    | 0.3761   |
| 0.4729    | 0.3937    | 0.3486    | 0.3593   |
| 0.4299    | 0.5005    | 0.1749    | 0.1462   |
| 0.08855   | 0.2975    | 0.0146    | 0.4      |
| 0.0137    | 0.0288    | 0.0002545 | 0.06197  |
| 0.06448   | 0.01592   | 0.01032   | 0.03024  |
| 0.0002406 | 0.0009235 | 0         | 0.003239 |
| 0.04525   | 0.04307   | 0.3939    | 0.1627   |
| 0.4384    | 0.2674    | 0.2577    | 0.3528   |
| 0.3991    | 0.2292    | 0.2561    | 0.2579   |
| 0.397     | 0.23      | 0.2567    | 0.2576   |
| 0.03178   | 0.006107  | 0.1967    | 0.003028 |
| 0.5174    | 0.249     | 0.3855    | 0.1322   |
| 0.0001238 | 0.0001802 | 0         | 0        |
| 0.005765  | 0.01583   | 0         | 0.01063  |
| 0.08315   | 0.2671    | 0.749     | 0.08255  |
| 0.1298    | 0.04758   | 0.03378   | 0.06868  |
| 0.2413    | 0.3505    | 0.4903    | 0.418    |

VEP annotated somatic variants

|                                        |                                       |                                    |                                    |
|----------------------------------------|---------------------------------------|------------------------------------|------------------------------------|
| 0.03651<br>0.0002341                   | 0.3044<br>0.000279                    | 0.18<br>0.0002693                  | 0.2757<br>0.0003086                |
| 0.6213<br>0.8481<br>0.1734             | 0.5533<br>0.5933<br>0.5751            | 0.7045<br>0.8399<br>0.6975         | 0.6923<br>0.794<br>0.6571          |
| 0.358                                  | 0.1364                                | 0.3994                             | 0.2045                             |
| 0.8463<br>0.8048<br>0.8925<br>0.004977 | 0.7759<br>0.756<br>0.7763<br>0.00808  | 0.7132<br>0.6592<br>0.6352<br>0    | 0.7807<br>0.71<br>0.761<br>0.05593 |
| 0.9525<br>0.3621                       | 0.9088<br>0.6914                      | 0.9898<br>0.6286                   | 0.6475<br>0.5998                   |
| 0.143<br>0.5533                        | 0.4337<br>0.7027                      | 0.482<br>0.8003                    | 0.4952<br>0.3761                   |
| 0.5268<br>0.4687                       | 0.5949<br>0.394                       | 0.3152<br>0.2137                   | 0.772<br>0.2596                    |
| 0.5345                                 | 0.3148                                | 0.381                              | 0.3333                             |
| 0.4886                                 | 0.2404                                | 0.2797                             | 0.1667                             |
| 0.3448<br>0<br>0.2729<br>0.05563       | 0.7155<br>0.01124<br>0.1639<br>0.1414 | 0.8236<br>0<br>0.2664<br>0.0005137 | 0.5454<br>0<br>0.1784<br>0.2012    |
| 0.3939<br>0.0523<br>0.0003311          | 0.5141<br>0.04116<br>0.00008917       | 0.5261<br>0.04439<br>0             | 0.6408<br>0.04835<br>0             |
| 0.3431                                 | 0.6178                                | 0.4214                             | 0.2519                             |
| 0.1022<br>0.004479                     | 0.2954<br>0.006712                    | 0.7232<br>0                        | 0.342<br>0.01925                   |
| 0.08036<br>0.005094                    | 0.1232<br>0.01736                     | 0.07488<br>0                       | 0.0319<br>0.008085                 |

VEP annotated somatic variants

|           |           |           |           |
|-----------|-----------|-----------|-----------|
| 0.8262    | 0.9059    | 0.6711    | 0.822     |
| 0.1322    | 0.5205    | 0.09566   | 0.5347    |
| 0.00785   | 0.1956    | 0.001186  | 0.0312    |
| 0.8512    | 0.7943    | 0.897     | 0.7818    |
| 0.2609    | 0.2711    | 0.6762    | 0.4744    |
| 0.4896    | 0.1291    | 0.1174    | 0.2261    |
| 0.597     | 0.7585    | 0.8755    | 0.6465    |
| 0.05357   | 0.1957    | 0.07692   | 0.25      |
| 0.09537   | 0.1817    | 0.1773    | 0.5241    |
| 0.5578    | 0.3272    | 0.2506    | 0.3182    |
| 0.227     | 0.5011    | 0.646     | 0.4083    |
| 0.2417    | 0.9147    | 0.8903    | 0.9589    |
| 0.00348   | 0.008224  | 0         | 0.005639  |
| 0.4448    | 0.3621    | 0.6342    | 0.3552    |
| 0.2794    | 0.4908    | 0.3856    | 0.3467    |
| 0.2434    | 0.488     | 0.7696    | 0.2881    |
| 0.1319    | 0.152     | 0.09377   | 0.05305   |
| 0.3118    | 0.5372    | 0.2852    | 0.4265    |
| 0.07447   | 0.1372    | 0.1358    | 0.1419    |
| 0.0001348 | 0.0001107 | 0.0009944 | 0.0004416 |
| 0.8356    | 0.6223    | 0.6822    | 0.5314    |
| 0.0001104 | 0.000446  | 0         | 0         |
| 0.0002255 | 0.0005371 | 0         | 0         |
| 0.01244   | 0.2447    | 0.1054    | 0.118     |
| 0.1947    | 0.1683    | 0.003085  | 0.3427    |
| 0.01899   | 0.05299   | 0         | 0.1768    |
| 0.2514    | 0.1432    | 0.3567    | 0.3078    |
| 0.1228    | 0.1145    | 0.3806    | 0.2224    |
| 0.1495    | 0.2369    | 0.09644   | 0.1103    |
| 0.7482    | 0.5466    | 0.5325    | 0.3824    |
| 0.6618    | 0.5934    | 0.5104    | 0.3635    |

VEP annotated somatic variants

|           |           |           |          |
|-----------|-----------|-----------|----------|
| 0.02872   | 0.04762   | 0.04348   | 0.4333   |
| 0.7859    | 0.5342    | 0.4667    | 0.3454   |
| 0.4569    | 0.3366    | 0.04017   | 0.1558   |
| 0.2047    | 0.3644    | 0.1646    | 0.4416   |
| 0.04903   | 0.04206   | 0         | 0.08     |
| 0.0005863 | 0.0004689 | 0         | 0.001015 |
| 0.8183    | 0.8134    | 0.938     | 0.4027   |
| 0.3814    | 0.4333    | 0.5625    | 0.6667   |
| 0.8939    | 0.7382    | 0.6804    | 0.7173   |
| 0.6781    | 0.6284    | 0.6048    | 0.5626   |
| 0.421     | 0.4437    | 0.3953    | 0.3868   |
| 0.913     | 0.8984    | 0.9997    | 0.8471   |
| 0.2976    | 0.606     | 0.3626    | 0.4014   |
| 0.07759   | 0.3413    | 0.6189    | 0.4054   |
| 0.002618  | 0.005756  | 0         | 0.004958 |
| 0.2385    | 0.2041    | 0.03065   | 0.3809   |
| 0.4336    | 0.1099    | 0.05894   | 0.2267   |
| 0.1907    | 0.4507    | 0.4491    | 0.4486   |
| 0.8836    | 0.6887    | 0.8101    | 0.6538   |
| 0.2086    | 0.4579    | 0.4444    | 0.4501   |
| 0.4562    | 0.6385    | 0.5482    | 0.6373   |
| 0.3097    | 0.2393    | 0.3757    | 0.2565   |
| 0.274     | 0.2413    | 0.02192   | 0.2828   |
| 0.03015   | 0.09223   | 0.2033    | 0.2143   |
| 0.6252    | 0.6581    | 0.9925    | 0.5523   |
| 0.4847    | 0.6758    | 0.765     | 0.6253   |
| 0.4039    | 0.491     | 0.364     | 0.7809   |
| 0.4282    | 0.6001    | 0.6354    | 0.6219   |
| 0.08626   | 0.2575    | 0.3067    | 0.2647   |
| 0.06189   | 0.1154    | 0.0002552 | 0.2852   |
| 0.1428    | 0.05421   | 0.0001272 | 0.1049   |
| 0.6983    | 0.1672    | 0.08066   | 0.2834   |
| 0         | 0         | 0         | 0        |
| 0.1531    | 0.4295    | 0.04185   | 0.6327   |
| 0.5552    | 0.6337    | 0.5651    | 0.5409   |
| 0.001552  | 0.004471  | 0.0001276 | 0.001362 |

VEP annotated somatic variants

|          |          |           |          |
|----------|----------|-----------|----------|
| 0.3122   | 0.2459   | 0.08661   | 0.1307   |
| 0.007673 | 0.0177   | 0.0001273 | 0.02398  |
| 0.4819   | 0.604    | 0.3157    | 0.5475   |
| 0.7479   | 0.5573   | 0.8596    | 0.3804   |
| 0.3121   | 0.4715   | 0.4411    | 0.4568   |
| 0.1802   | 0.3118   | 0.374     | 0.3956   |
| 0.205    | 0.3747   | 0.4049    | 0.4235   |
| 0.2367   | 0.3197   | 0.3739    | 0.3965   |
| 0.01193  | 0.01576  | 0.06634   | 0.06472  |
| 0.001338 | 0.001343 | 0         | 0.02152  |
| 0.003027 | 0.005621 | 0         | 0.009226 |
| 0.2425   | 0.1795   | 0.2411    | 0.4561   |
| 0.2336   | 0.3507   | 0.1483    | 0.5688   |
| 0.04776  | 0.2687   | 0.3305    | 0.1122   |
| 0.2027   | 0.857    | 0.427     | 0.8608   |
| 0.0469   | 0.3663   | 0.6434    | 0.3957   |
| 0.502    | 0.6497   | 0.681     | 0.2747   |
| 0.2917   | 0.3353   | 0.2689    | 0.1373   |
| 0.001303 | 0.001519 | 0.0002626 | 0.00711  |
| 0.001988 | 0.005894 | 0.0003815 | 0.00605  |
| 0.3899   | 0.7712   | 0.4913    | 0.5486   |
| 0.2243   | 0.113    | 0.01732   | 0.09444  |
| 0.1282   | 0.3986   | 0.3665    | 0.2965   |
| 0.4595   | 0.5508   | 0.7396    | 0.5261   |
| 0.005747 | 0        | 0         | 0        |
| 0.003136 | 0.0175   | 0         | 0.01624  |
| 0.001464 | 0.007722 | 0         | 0        |
| 0.4078   | 0.5707   | 0.4216    | 0.5607   |
| 0.04122  | 0.3525   | 0.5014    | 0.09631  |
| 0.08045  | 0.03665  | 0         | 0.0353   |
| 0.02284  | 0.008213 | 0.0005086 | 0.01785  |
| 0.4222   | 0.4356   | 0.3388    | 0.2519   |
| 0.02321  | 0.235    | 0.00928   | 0.08757  |
| 0.009091 | 0.01198  | 0         | 0.03143  |
| 0.8915   | 0.8324   | 0.8972    | 0.7079   |
| 0.1842   | 0.07787  | 0         | 0.075    |
| 0.1592   | 0.07403  | 0.002417  | 0.1953   |
| 0.2976   | 0.05836  | 0.1381    | 0.05715  |
| 0.2664   | 0.4317   | 0.3204    | 0.2291   |



VEP annotated somatic variants

|          |          |           |          |
|----------|----------|-----------|----------|
| 0.2457   | 0.03984  | 0.0173    | 0.03462  |
| 0.735    | 0.5673   | 0.6576    | 0.5635   |
| 0.007484 | 0.01893  | 0         | 0.0267   |
| 0.117    | 0.1556   | 0.1406    | 0        |
| 0.03607  | 0.05957  | 0.002415  | 0.1898   |
| 0.09292  | 0.2514   | 0.162     | 0.0386   |
| 0.04071  | 0.1658   | 0.244     | 0.2383   |
| 0.5113   | 0.7004   | 0.8007    | 0.3759   |
| 0.07029  | 0.1424   | 0.3457    | 0.1252   |
| 0.4191   | 0.4324   | 0.8429    | 0.5712   |
| 0.9461   | 0.7884   | 0.8482    | 0.6662   |
| 0.3888   | 0.2884   | 0.4875    | 0.2999   |
| 0.003147 | 0.007274 | 0         | 0.01171  |
| 0.2483   | 0.4644   | 0.3544    | 0.2897   |
| 0.2859   | 0.6091   | 0.936     | 0.6227   |
| 0.05868  | 0.02704  | 0         | 0.0605   |
| 0.008933 | 0.0245   | 0         | 0.06258  |
| 0.01235  | 0.03393  | 0         | 0.07668  |
| 0.1447   | 0.3526   | 0.14      | 0.2237   |
| 0.4393   | 0.2584   | 0.2172    | 0.3092   |
| 0.8234   | 0.6307   | 0.453     | 0.7814   |
| 0.004986 | 0.01073  | 0         | 0.07754  |
| 0.2683   | 0.06832  | 0.1003    | 0.1899   |
| 0.3142   | 0.08178  | 0.1046    | 0.09846  |
| 0.6756   | 0.1143   | 0.1108    | 0.1548   |
| 0.1122   | 0.04277  | 0.001703  | 0.04087  |
| 0.193    | 0.2267   | 0.1157    | 0.2245   |
| 0.6722   | 0.1526   | 0.5122    | 0.09053  |
| 0.03191  | 0.2146   | 0.1107    | 0.1667   |
| 0.01128  | 0.0301   | 0         | 0.06923  |
| 0.2      | 0.5779   | 0.4296    | 0.3601   |
| 0.1536   | 0.01324  | 0.0001275 | 0.007023 |
| 0.5575   | 0.3488   | 0.3643    | 0.4247   |
| 0.06237  | 0.2239   | 0.3753    | 0.3522   |

VEP annotated somatic variants

|          |          |           |          |
|----------|----------|-----------|----------|
| 0.06391  | 0.08873  | 0.1595    | 0.2157   |
| 0.1588   | 0.05241  | 0.1584    | 0.107    |
| 0.002868 | 0.003835 | 0         | 0.01648  |
| 0.1575   | 0.2277   | 0.364     | 0.1163   |
| 0.2052   | 0.2308   | 0.06529   | 0.2442   |
| 0        | 0        | 0         | 0        |
| 0.8209   | 0.7217   | 0.8167    | 0.3761   |
| 0.002635 | 0.001787 | 0         | 0.005443 |
| 0.2135   | 0.4517   | 0.4687    | 0.5152   |
| 0.2708   | 0.2383   | 0.2693    | 0.3277   |
| 0.2381   | 0.09817  | 0.1108    | 0.1052   |
| 0.3223   | 0.228    | 0.1148    | 0.2438   |
| 0.3525   | 0.2311   | 0.1169    | 0.2412   |
| 0.3655   | 0.6853   | 0.4842    | 0.3741   |
| 0.1992   | 0.5582   | 0.4058    | 0.3314   |
| 0.1439   | 0.3969   | 0.02431   | 0.5294   |
| 0.103    | 0.2769   | 0.2032    | 0.276    |
| 0.1411   | 0.1494   | 0.3874    | 0.124    |
| 0.2496   | 0.1798   | 0.3454    | 0.1445   |
| 0.5322   | 0.3048   | 0.2865    | 0.3953   |
| 0.1644   | 0.275    | 0.2906    | 0.2182   |
| 0.3551   | 0.2603   | 0.2132    | 0.4829   |
| 0.3122   | 0.3369   | 0.4035    | 0.3928   |
| 0.257    | 0.2848   | 0.02702   | 0.1492   |
| 0.2747   | 0.1598   | 0.3086    | 0.2154   |
| 0.046    | 0.1021   | 0.002316  | 0.2383   |
| 0.009045 | 0.0403   | 0.1772    | 0.1258   |
| 0.3562   | 0.2457   | 0.0006395 | 0.2393   |
| 0.4929   | 0.4826   | 0.4501    | 0.5197   |
| 0.438    | 0.259    | 0.5486    | 0.3962   |
| 0.1067   | 0.4919   | 0.09719   | 0.1656   |
| 0.2364   | 0.5977   | 0.3464    | 0.5536   |
| 0.02889  | 0.04387  | 0.194     | 0.1818   |
| 0.0437   | 0.05338  | 0.1829    | 0.03118  |
| 0.5575   | 0.344    | 0.5518    | 0.3322   |

VEP annotated somatic variants

|         |         |          |         |
|---------|---------|----------|---------|
| 0.207   | 0.1278  | 0.1912   | 0.1863  |
| 0.4235  | 0.1531  | 0.2312   | 0.1944  |
| 0.7327  | 0.6316  | 0.8095   | 0.6258  |
| 0.8329  | 0.2666  | 0.1512   | 0.412   |
| 0.1005  | 0.2237  | 0.1571   | 0.4008  |
| 0.1398  | 0.3729  | 0.1923   | 0.5     |
| 0.07581 | 0.2311  | 0.1502   | 0.4108  |
| 0.8531  | 0.2736  | 0.1629   | 0.4273  |
| 0.7456  | 0.2636  | 0.1517   | 0.4085  |
| 0.1248  | 0.2125  | 0.2627   | 0.44    |
| 0.5705  | 0.6182  | 0.4637   | 0.6333  |
| 0.4537  | 0.4444  | 0.3937   | 0.6667  |
| 0.2117  | 0.2917  | 0.6481   | 0.07895 |
| 0.3076  | 0.1299  | 0.3228   | 0.2825  |
| 0.3265  | 0.1638  | 0.07871  | 0.3056  |
| 0.3275  | 0.2096  | 0.4194   | 0.3565  |
| 0.386   | 0.1731  | 0.007576 | 0       |
| 0.2005  | 0.3481  | 0.3249   | 0.4444  |
| 0.2769  | 0.4131  | 0.4272   | 0.2438  |
| 0.4134  | 0.08154 | 0.06618  | 0.1833  |
| 0.0192  | 0.1286  | 0.04353  | 0.1637  |
| 0.06547 | 0.1153  | 0.2368   | 0.2024  |
| 0.5157  | 0.5633  | 0.4145   | 0.556   |
| 0.642   | 0.2595  | 0.4199   | 0.5671  |
| 0.2684  | 0.4141  | 0.4251   | 0.3317  |
| 0.3015  | 0.3018  | 0.475    | 0.2836  |
| 0.1555  | 0.1468  | 0.02875  | 0.2222  |
| 0.5367  | 0.5212  | 0.7521   | 0.5816  |
| 0.3571  | 0.5031  | 0.4856   | 0.4453  |
| 0.6536  | 0.7109  | 0.7506   | 0.5366  |
| 0.621   | 0.7011  | 0.742    | 0.5182  |
| 0.6213  | 0.7013  | 0.7423   | 0.5189  |
| 0.5057  | 0.3089  | 0.3372   | 0.2742  |
| 0.5718  | 0.5777  | 0.4646   | 0.5021  |
| 0.2821  | 0.1716  | 0.2582   | 0.4061  |
| 0.3323  | 0.2536  | 0.1996   | 0.2867  |
| 0.5431  | 0.6065  | 0.52     | 0.6602  |
| 0.01465 | 0.1593  | 0.003214 | 0.2047  |
| 0.6111  | 0.3385  | 0.462    | 0.2838  |

VEP annotated somatic variants

|           |          |           |          |
|-----------|----------|-----------|----------|
| 0.08284   | 0.2073   | 0.002303  | 0.08258  |
| 0.01287   | 0.2311   | 0.001045  | 0.07067  |
| 0.2747    | 0.1209   | 0.09477   | 0.1513   |
| 0.3585    | 0.2599   | 0.3246    | 0.5029   |
| 0.2084    | 0.05132  | 0.1516    | 0.1195   |
| 0.5581    | 0.6123   | 0.7331    | 0.4524   |
| 0.05317   | 0.1439   | 0.0007628 | 0.2465   |
| 0.0006974 | 0.001252 | 0.03737   | 0.006822 |
| 0.003861  | 0.002318 | 0.03715   | 0.006655 |
| 0.0007641 | 0.001456 | 0.04161   | 0.007681 |
| 0.4943    | 0.5019   | 0.5714    | 0.4524   |
| 0.6229    | 0.6286   | 0.6529    | 0.4638   |
| 0.5192    | 0.2698   | 0.1785    | 0.1227   |
| 0.1892    | 0.2296   | 0.1732    | 0.2299   |
| 0.9697    | 0.9741   | 0.9997    | 0.944    |
| 0.6896    | 0.5842   | 0.6011    | 0.3322   |
| 0.3539    | 0.1911   | 0.08048   | 0.2871   |
| 0.6396    | 0.1196   | 0.05712   | 0.1508   |
| 0.6105    | 0.4931   | 0.05517   | 0.3658   |
| 0.791     | 0.9098   | 0.9727    | 0.875    |
| 0.1079    | 0.1623   | 0.2948    | 0.2552   |
| 0.4279    | 0.6686   | 0.6486    | 0.6729   |
| 0.002674  | 0.001894 | 0         | 0.007937 |
| 0         | 0        | 0         | 0        |
| 0.5651    | 0.297    | 0.2575    | 0.4161   |
| 0.08802   | 0.2109   | 0.2441    | 0.3539   |
| 0.09993   | 0.07923  | 0         | 0.1474   |
| 0.0624    | 0.1417   | 0.04346   | 0.2652   |
| 0.242     | 0.6716   | 0.742     | 0.5838   |
| 0.7448    | 0.5127   | 0.6011    | 0.4518   |
| 0.06562   | 0.2659   | 0.2535    | 0.2765   |
| 0.2584    | 0.409    | 0.4511    | 0.6355   |
| 0.3209    | 0.4623   | 0.6097    | 0.4912   |
| 0.6657    | 0.7381   | 0.9135    | 0.6962   |
| 0.9129    | 0.8012   | 0.9867    | 0.8258   |

VEP annotated somatic variants

|           |          |          |           |
|-----------|----------|----------|-----------|
| 0.2332    | 0.5386   | 0.2323   | 0.346     |
| 0.1218    | 0.4984   | 0.25     | 0.4929    |
| 0.2513    | 0.5827   | 0.4258   | 0.5452    |
| 0.6472    | 0.5668   | 0.6049   | 0.4463    |
| 0.0009291 | 0.006223 | 0        | 0.02289   |
| 0.6667    | 0.6673   | 0.8363   | 0.4137    |
| 0.06632   | 0.1829   | 0.277    | 0.334     |
| 0.1895    | 0.2889   | 0.1719   | 0         |
| 0.09799   | 0.36     | 0.2752   | 0.2063    |
| 0.2178    | 0.3696   | 0.1042   | 0.4382    |
| 0.1525    | 0.5216   | 0.007558 | 0.7423    |
| 0.2123    | 0.3252   | 0.2303   | 0.4024    |
| 0.2391    | 0.3534   | 0.2822   | 0.4215    |
| 0.4626    | 0.816    | 0.8013   | 0.7044    |
| 0.4632    | 0.8221   | 0.798    | 0.704     |
| 0.4527    | 0.3382   | 0.08714  | 0.2169    |
| 0.3019    | 0.1001   | 0.02022  | 0.1211    |
| 0.4592    | 0.91     | 0.9889   | 0.8916    |
| 0.4228    | 0.6044   | 0.7545   | 0.3112    |
| 0.05145   | 0.04789  | 0.05228  | 0.09252   |
| 0.2516    | 0.5714   | 0.6456   | 0.647     |
| 0.4394    | 0.3217   | 0.4422   | 0.4107    |
| 0.09834   | 0.1793   | 0.3126   | 0.1177    |
| 0.01486   | 0.001789 | 0        | 0.0006107 |
| 0         | 0        | 0        | 0         |
| 0.4627    | 0.7863   | 0.6438   | 0.5519    |
| 0.4799    | 0.5431   | 0.4544   | 0.5138    |
| 0.2406    | 0.2689   | 0.002953 | 0.573     |
| 0.545     | 0.4258   | 0.7177   | 0.2891    |
| 0.5554    | 0.3986   | 0.2215   | 0.4061    |
| 0.6303    | 0.3996   | 0.357    | 0.3823    |
| 0.8331    | 0.8986   | 0.6883   | 0.8825    |
| 0.8836    | 0.867    | 0.9581   | 0.8948    |

VEP annotated somatic variants

|           |          |           |          |
|-----------|----------|-----------|----------|
| 0.94      | 0.9129   | 0.9454    | 0.8909   |
| 0.0004073 | 0.000612 | 0         | 0.002262 |
| 0         | 0.002688 | 0         | 0.0252   |
| 0.1132    | 0.2581   | 0.2451    | 0.2651   |
| 0.119     | 0.2022   | 0.1751    | 0.1344   |
| 0.0544    | 0.4027   | 0.3036    | 0.2895   |
| 0.1984    | 0.1651   | 0.1516    | 0.2349   |
| 0.2449    | 0.1657   | 0.1514    | 0.2355   |
| 0.1092    | 0.04488  | 0         | 0.04794  |
| 0.03946   | 0.04764  | 0.01286   | 0.0778   |
| 0.2896    | 0.5663   | 0.708     | 0.5275   |
| 0.3652    | 0.5553   | 0.6943    | 0.5244   |
| 0.03091   | 0.06329  | 0         | 0.1032   |
| 0.0007468 | 0.00114  | 0         | 0.002446 |
| 0.3025    | 0.2514   | 0.3533    | 0.4385   |
| 0.5197    | 0.3663   | 0.7886    | 0.5217   |
| 0.01589   | 0.07613  | 0.00134   | 0.08447  |
| 0.6374    | 0.2657   | 0.1887    | 0.1816   |
| 0.08915   | 0.151    | 0.1327    | 0.2458   |
| 0.03021   | 0.4155   | 0.08185   | 0.03932  |
| 0.1977    | 0.7116   | 0.6019    | 0.695    |
| 0.1019    | 0.2613   | 0.05128   | 0.4902   |
| 0.02208   | 0.03988  | 0.000509  | 0.09797  |
| 0         | 0        | 0         | 0        |
| 0.1294    | 0.0915   | 0.0006391 | 0.1541   |
| 0.08881   | 0.07965  | 0.1703    | 0.2658   |
| 0.689     | 0.3838   | 0.9695    | 0.6085   |
| 0.03457   | 0.1228   | 0.1088    | 0.1808   |
| 0.04571   | 0.185    | 0.1561    | 0.2466   |
| 0.3954    | 0.4118   | 0.6502    | 0.5484   |
| 0.863     | 0.8185   | 0.9823    | 0.7452   |
| 0.071     | 0.01237  | 0.02181   | 0.003634 |

VEP annotated somatic variants

|                                        |                                       |                                         |                                        |
|----------------------------------------|---------------------------------------|-----------------------------------------|----------------------------------------|
| 0.1397<br>0.838                        | 0.4786<br>0.827                       | 0.1374<br>0.5062                        | 0.367<br>0.7421                        |
| 0.06193                                | 0.1063                                | 0.1467                                  | 0.1649                                 |
| 0.3576                                 | 0.15                                  | 0.4526                                  | 0.2679                                 |
| 0.2188                                 | 0.1213                                | 0.008535                                | 0.2655                                 |
| 0.3235                                 | 0.2087                                | 0.34                                    | 0.1438                                 |
| 0.2387<br>0.1645<br>0.1382<br>0.9285   | 0.1559<br>0.6531<br>0.0979<br>0.7193  | 0.1461<br>0.4672<br>0.1331<br>0.8477    | 0.1179<br>0.531<br>0.04445<br>0.5002   |
| 0.05008                                | 0.385                                 | 0.3819                                  | 0.2694                                 |
| 0.06509                                | 0.00831                               | 0.005472                                | 0.0001512                              |
| 0.2302<br>0.6964<br>0.08012<br>0.4286  | 0.6364<br>0.4325<br>0.03839<br>0.1675 | 0.4647<br>0.4304<br>0.2767<br>0.1998    | 0.4836<br>0.5758<br>0.0378<br>0.09382  |
| 0.004685<br>0.221                      | 0.01803<br>0.2563                     | 0.0001286<br>0.1853                     | 0.08203<br>0.06749                     |
| 0.001435<br>0.1464<br>0.5158<br>0.7376 | 0.00616<br>0.1244<br>0.3591<br>0.514  | 0.0001271<br>0.2609<br>0.4218<br>0.5438 | 0.001378<br>0.1365<br>0.2844<br>0.4958 |
| 0.003549                               | 0.01254                               | 0                                       | 0.02028                                |
| 0.6897                                 | 0.8419                                | 0.8825                                  | 0.8081                                 |
| 0.3973                                 | 0.3478                                | 0.4022                                  | 0.2849                                 |
| 0.1348                                 | 0.1153                                | 0.0007632                               | 0.1752                                 |

VEP annotated somatic variants

|           |          |           |           |
|-----------|----------|-----------|-----------|
| 0.2349    | 0.1981   | 0.3596    | 0.1539    |
| 0.8363    | 0.6535   | 0.7022    | 0.7682    |
| 0.444     | 0.4667   | 0.2931    | 0.6597    |
| 0.001634  | 0        | 0         | 0         |
| 0.1917    | 0.4192   | 0.3904    | 0.1668    |
| 0.3683    | 0.7745   | 0.8056    | 0.6883    |
| 0.05235   | 0.1255   | 0.09266   | 0.2776    |
| 0.7317    | 0.6322   | 0.715     | 0.533     |
| 0.5898    | 0.4483   | 0.4578    | 0.4819    |
| 0.7324    | 0.1303   | 0.1794    | 0.1306    |
| 0.4925    | 0.5167   | 0.7536    | 0.6131    |
| 0.2213    | 0.1682   | 0.04729   | 0.03982   |
| 0.008877  | 0.01512  | 0         | 0.04672   |
| 0.1035    | 0.0345   | 0.0003815 | 0.1057    |
| 0.1812    | 0.2528   | 0.03536   | 0.1394    |
| 0.1147    | 0.4096   | 0.4461    | 0.2611    |
| 0.0649    | 0.3438   | 0.5192    | 0.118     |
| 0.1445    | 0.2045   | 0.1645    | 0.2595    |
| 0.00662   | 0.008917 | 0.0002543 | 0.03493   |
| 0.2936    | 0.25     | 0.06818   | 0.5       |
| 0.2795    | 0.2068   | 0.05572   | 0.4511    |
| 0.3812    | 0.4157   | 0.9835    | 0.4421    |
| 0.003203  | 0.003709 | 0         | 0.0289    |
| 0.1662    | 0.1764   | 0.1939    | 0.1999    |
| 0.2298    | 0.2592   | 0.07479   | 0.3163    |
| 0.1089    | 0.09214  | 0.06993   | 0.09756   |
| 0.1751    | 0.08075  | 0         | 0.2222    |
| 0.374     | 0.305    | 0.3491    | 0.438     |
| 0.05716   | 0.4232   | 0.354     | 0.3837    |
| 0.005193  | 0.007744 | 0         | 0.04709   |
| 0.08878   | 0.3266   | 0.2966    | 0.3825    |
| 0.6615    | 0.7852   | 0.852     | 0.5389    |
| 0.0006907 | 0.001218 | 0         | 0.0002208 |
| 0.116     | 0.2305   | 0.1955    | 0.2241    |



VEP annotated somatic variants

|           |           |           |           |
|-----------|-----------|-----------|-----------|
| 0.9049    | 0.7866    | 0.6452    | 0.7136    |
| 0.8711    | 0.3243    | 0.4201    | 0.2455    |
| 0.2852    | 0.112     | 0.101     | 0.1626    |
| 0.4868    | 0.3694    | 0.4999    | 0.3436    |
| 0.003544  | 0.002769  | 0         | 0.00605   |
| 0.1701    | 0.3518    | 0.4236    | 0.354     |
| 0         | 0.0004495 | 0         | 0.0006057 |
| 0.2816    | 0.4055    | 0.2662    | 0.4085    |
| 0.1806    | 0.09749   | 0.4412    | 0.04325   |
| 0.1616    | 0.08156   | 0.09812   | 0.1382    |
| 0.005537  | 0.01425   | 0.0002082 | 0.01919   |
| 0.006751  | 0.006075  | 0         | 0.04433   |
| 0.423     | 0.4913    | 0.2484    | 0.4743    |
| 0.1916    | 0.277     | 0.1568    | 0.2152    |
| 0.06804   | 0.3371    | 0.6581    | 0.3935    |
| 0.0002279 | 0.0004529 | 0         | 0.0007634 |
| 0.06718   | 0.2579    | 0.5738    | 0.234     |
| 0.1688    | 0.5779    | 0.8495    | 0.6452    |
| 0.2379    | 0.4256    | 0.2656    | 0.4112    |
| 0.2557    | 0.343     | 0.2479    | 0.3355    |
| 0.3479    | 0.2393    | 0.3687    | 0.2526    |
| 0.1522    | 0.2308    | 0.3662    | 0.2641    |
| 0.8723    | 0.3121    | 0.4239    | 0.2039    |
| 0.8593    | 0.3133    | 0.4236    | 0.2039    |
| 0.2012    | 0.0946    | 0.001161  | 0.124     |
| 0.04492   | 0.2639    | 0.005339  | 0.2499    |
| 0.8893    | 0.7362    | 0.6609    | 0.5005    |
| 0.04593   | 0.1981    | 0.2435    | 0.2582    |
| 0.01136   | 0.03655   | 0.08437   | 0.05519   |
| 0.217     | 0.2559    | 0.5379    | 0.2096    |
| 0.009069  | 0.03709   | 0         | 0.0331    |
| 0.00335   | 0.006964  | 0         | 0.01757   |
| 0.7299    | 0.5603    | 0.6454    | 0.7781    |

VEP annotated somatic variants

|           |           |           |          |
|-----------|-----------|-----------|----------|
| 0.666     | 0.4714    | 0.09321   | 0.3331   |
| 0         | 0         | 0         | 0        |
| 0.0012    | 0.004746  | 0         | 0.009078 |
| 0.2158    | 0.07858   | 0.02835   | 0.1478   |
| 0.02956   | 0.1146    | 0.0002644 | 0.2469   |
| 0.09026   | 0.548     | 0.4808    | 0.4141   |
| 0.2236    | 0.08188   | 0.08698   | 0.1024   |
| 0.2543    | 0.09914   | 0.09701   | 0.1355   |
| 0.03329   | 0.07641   | 0         | 0.223    |
| 0.2662    | 0.1275    | 0.1527    | 0.1642   |
| 0.3027    | 0.1574    | 0.3521    | 0.2487   |
| 0.4227    | 0.3824    | 0.4335    | 0.4393   |
| 0         | 0         | 0         | 0.01478  |
| 0.08148   | 0.4359    | 0.2832    | 0.3667   |
| 0.6089    | 0.6053    | 0.4       | 0.6667   |
| 0.7944    | 0.5991    | 0.2962    | 0.5614   |
| 0.1337    | 0.6463    | 0.2777    | 0.4501   |
| 0.1094    | 0.2796    | 0.0005552 | 0.2829   |
| 0.04079   | 0.05594   | 0.06211   | 0.2285   |
| 0.7712    | 0.4152    | 0.3886    | 0.6148   |
| 0         | 0         | 0         | 0        |
| 0.7745    | 0.4571    | 0.4483    | 0.3124   |
| 0.0001235 | 0         | 0         | 0        |
| 0.2259    | 0.08482   | 0.1758    | 0.1373   |
| 0.3448    | 0.3453    | 0.1533    | 0.2238   |
| 0.0843    | 0.2511    | 0.7052    | 0.4096   |
| 0.332     | 0.8722    | 0.8213    | 0.7708   |
| 0.3126    | 0.4501    | 0.3776    | 0.3545   |
| 0.5304    | 0.7435    | 0.5925    | 0.5649   |
| 0.0004078 | 0.0005624 | 0         | 0        |
| 0.001435  | 0.002319  | 0.003178  | 0.01906  |
| 0.004523  | 0.006032  | 0.0001273 | 0.04482  |
| 0.9306    | 0.7726    | 0.8214    | 0.6172   |

VEP annotated somatic variants

|           |           |           |           |
|-----------|-----------|-----------|-----------|
| 0.7272    | 0.8274    | 0.8346    | 0.7646    |
| 0.05832   | 0.004471  | 0         | 0         |
| 0.1454    | 0.214     | 0.2438    | 0.02511   |
| 0.1094    | 0.3519    | 0.1396    | 0.4537    |
| 0.5168    | 0.5897    | 0.6104    | 0.678     |
| 0.1831    | 0.5268    | 0.4226    | 0.2835    |
| 0.4183    | 0.5365    | 0.4209    | 0.2686    |
| 0.857     | 0.6865    | 0.526     | 0.666     |
| 0.8189    | 0.6677    | 0.5202    | 0.5076    |
| 0.3676    | 0.6452    | 0.4007    | 0.456     |
| 0.002278  | 0.003442  | 0         | 0.02536   |
| 0.0001215 | 0.0002785 | 0         | 0.009918  |
| 0.02778   | 0.0431    | 0.003125  | 0.03484   |
| 0.03354   | 0.09555   | 0.09871   | 0.3015    |
| 0.5345    | 0.4886    | 0.6522    | 0.5055    |
| 0.2096    | 0.1605    | 0.1334    | 0.2365    |
| 0.06115   | 0.2595    | 0.3246    | 0.1399    |
| 0.1838    | 0.1865    | 0.1251    | 0.147     |
| 0.03149   | 0.01972   | 0.3034    | 0.03645   |
| 0.001425  | 0.001171  | 0.0003871 | 0.0007569 |
| 0.003316  | 0.002807  | 0         | 0.001696  |
| 0.6331    | 0.3937    | 0.0631    | 0.3879    |
| 0.4417    | 0.2958    | 0.1509    | 0.5271    |
| 0.1787    | 0.4232    | 0.7055    | 0.2934    |
| 0.7488    | 0.4983    | 0.7318    | 0.4098    |
| 0.3881    | 0.5835    | 0.2936    | 0.6742    |
| 0.2596    | 0.04819   | 0.02795   | 0.001185  |
| 0.2322    | 0.5969    | 0.7539    | 0.2349    |
| 0.9162    | 0.7138    | 0.8743    | 0.5369    |
| 0.09983   | 0.5475    | 0.7457    | 0.2138    |
| 0.01986   | 0.06322   | 0.0002567 | 0.05593   |

VEP annotated somatic variants

|          |          |           |          |
|----------|----------|-----------|----------|
| 0.003822 | 0.008525 | 0         | 0.03717  |
| 0        | 0        | 0         | 0        |
| 0.3821   | 0.6632   | 0.4365    | 0.5957   |
| 0.2986   | 0.07701  | 0.1869    | 0.07504  |
| 0.6917   | 0.2708   | 0.2535    | 0.1838   |
| 0.2606   | 0.5139   | 0.6695    | 0.1899   |
| 0.02211  | 0.07198  | 0.05049   | 0.1428   |
| 0.8236   | 0.8122   | 0.7874    | 0.5333   |
| 0.03497  | 0.08055  | 0.1966    | 0.03887  |
| 0.01761  | 0.214    | 0.391     | 0.1154   |
| 0.8055   | 0.4775   | 0.7236    | 0.4924   |
| 0.7186   | 0.5436   | 0.5206    | 0.2846   |
| 0.6256   | 0.5184   | 0.6328    | 0.4905   |
| 0.2116   | 0.1435   | 0.02476   | 0.1743   |
| 0.3511   | 0.4385   | 0.469     | 0.2352   |
| 0.03161  | 0.2189   | 0.03777   | 0.2203   |
| 0.7168   | 0.5277   | 0.5208    | 0.3017   |
| 0.5861   | 0.3931   | 0.3639    | 0.3424   |
| 0.7879   | 0.5879   | 0.8072    | 0.5402   |
| 0.7117   | 0.5256   | 0.6254    | 0.492    |
| 0.07937  | 0.4833   | 0.5       | 0.2727   |
| 0.05821  | 0.2807   | 0.04046   | 0.3739   |
| 0.001333 | 0.007321 | 0.0001274 | 0.001368 |
| 0.8072   | 0.2505   | 0.341     | 0.3058   |
| 0.1122   | 0.2026   | 0.4928    | 0.4111   |
| 0.8415   | 0.8134   | 0.3939    | 0.7242   |
| 0.6214   | 0.2354   | 0.1895    | 0.3266   |
| 0.7572   | 0.4616   | 0.287     | 0.3993   |

VEP annotated somatic variants

| ExAC_AF_NFE | ExAC_AF_OTH | ExAC_AF_SAS | GENE_PHENO |
|-------------|-------------|-------------|------------|
| 0.03852     | 0.02639     | 0.01608     | 1          |
| 0.6659      | 0.611       | 0.6184      | 1          |
| 0.6329      | 0.5698      | 0.5932      |            |
| 0.7088      | 0.6387      | 0.6374      |            |
| 0.0000552   | 0           | 0           | 1          |
| 0.2554      | 0.283       | 0.2905      | 1          |
| 0.01094     | 0           | 0.05608     |            |
| 0.2146      | 0.1988      | 0.145       |            |
| 0.8635      | 0.822       | 0.7878      |            |
| 0.07916     | 0.05825     | 0.04588     | 1          |
|             |             |             | 1          |
|             |             |             | 1          |
| 0           | 0           | 0           |            |
| 0.03902     | 0.02915     | 0.1214      | 1          |
| 0.6369      | 0.6571      | 0.699       |            |
| 0.4204      | 0.3598      | 0.2995      | 1          |
|             |             |             | 1          |
| 0.2001      | 0.1652      | 0.1442      | 1          |
|             |             |             | 1          |
| 0.3808      | 0.3113      | 0.2435      |            |
| 0.4892      | 0.4823      | 0.4759      | 1          |
| 0.0006711   | 0           | 0.001581    |            |
| 0.584       | 0.6108      | 0.7575      |            |
| 0.01294     | 0.02041     | 0.02643     |            |
| 0.1976      | 0.2115      | 0.2364      |            |
| 0.0482      | 0.05263     | 0.08418     |            |
| 0.185       | 0.2229      | 0.3664      |            |
| 0.6053      | 0.6225      | 0.5105      | 1          |
| 0.05142     | 0.03205     | 0.02327     | 1          |
| 0.4687      | 0.4023      | 0.4272      |            |
| 0.4764      | 0.5362      | 0.4871      | 1          |
|             |             |             | 1          |
| 0.1137      | 0.1441      | 0.3089      |            |
| 0.3572      | 0.3172      | 0.1829      |            |
| 0.02422     | 0.01156     | 0.001829    | 1          |
| 0.2516      | 0.2277      | 0.1777      | 1          |
|             |             |             | 1          |
| 0.4315      | 0.4238      | 0.4052      | 1          |
|             |             |             | 1          |
| 0.7068      | 0.6983      | 0.765       | 1          |

VEP annotated somatic variants

|            |         |            |   |
|------------|---------|------------|---|
| 0.3358     | 0.271   | 0.1441     |   |
| 0.1615     | 0.2139  | 0.1538     | 1 |
| 0.08443    | 0.07205 | 0.07811    |   |
| 0.7525     | 0.7334  | 0.8279     |   |
| 0.4136     | 0.3889  | 0.3771     |   |
| 0.2844     | 0.2653  | 0.2924     | 1 |
| 0.2122     | 0.1977  | 0.1388     |   |
| 0.1396     | 0.2042  | 0.2433     |   |
| 0.209      | 0.2194  | 0.2111     |   |
| 0.8221     | 0.8378  | 0.8787     | 1 |
| 0.1232     | 0.2056  | 0.2046     |   |
| 0.128      | 0.07948 | 0.02529    |   |
| 0.06035    | 0.04638 | 0.02365    | 1 |
| 0.00001848 | 0       | 0.00006118 | 1 |
|            |         |            | 1 |
| 0.3484     | 0.2753  | 0.1445     |   |
| 0.354      | 0.2807  | 0.1506     |   |
| 0.03292    | 0.05217 | 0.02982    |   |
| 0.07289    | 0.0634  | 0.03078    |   |
| 0.3123     | 0.2741  | 0.3292     |   |
| 0.1127     | 0.167   | 0.2466     |   |
| 0.1164     | 0.05155 | 0.008339   |   |
| 0.29       | 0.3055  | 0.2772     |   |
| 0.1693     | 0.1835  | 0.2491     |   |
| 0.07615    | 0.05347 | 0.01586    |   |
| 0.7398     | 0.5664  | 0.5483     |   |
| 0.7424     | 0.5641  | 0.542      |   |
| 0.6942     | 0.5135  | 0.4613     |   |
| 0.2307     | 0.1616  | 0.1598     |   |
| 0.2177     | 0.2186  | 0.1657     |   |
| 0.07687    | 0.05652 | 0.02271    | 1 |
|            |         |            | 1 |
| 0.299      | 0.2751  | 0.2519     | 1 |
| 0.05088    | 0.07015 | 0.06787    |   |

VEP annotated somatic variants

|         |          |           |   |
|---------|----------|-----------|---|
| 0.5904  | 0.5397   | 0.4367    | 1 |
| 0.3652  | 0.3381   | 0.2509    |   |
| 0.5798  | 0.6393   | 0.6754    | 1 |
| 0.1601  | 0.1407   | 0.2091    |   |
| 0.04818 | 0.02594  | 0.01041   | 1 |
|         |          |           | 1 |
| 0.02991 | 0.0302   | 0.01866   | 1 |
| 0.1178  | 0.1297   | 0.104     | 1 |
| 0.3318  | 0.3516   | 0.2818    |   |
| 0.08152 | 0.0913   | 0.06437   |   |
| 0.2276  | 0.2196   | 0.3735    | 1 |
|         |          |           | 1 |
| 0.2972  | 0.2551   | 0.2332    |   |
| 0.4683  | 0.3775   | 0.3234    | 1 |
| 0.2386  | 0.2795   | 0.531     |   |
| 0.9115  | 0.9428   | 0.9892    |   |
| 0.3752  | 0.4245   | 0.5155    |   |
| 0.325   | 0.2652   | 0.2235    |   |
| 0.3899  | 0.3899   | 0.3175    | 1 |
| 0.7751  | 0.7579   | 0.7354    |   |
| 0.341   | 0.415    | 0.4736    | 1 |
| 0.1364  | 0.1145   | 0.1627    | 1 |
| 0.1803  | 0.1488   | 0.07199   |   |
|         |          |           | 1 |
| 0.1379  | 0.09677  | 0.06909   | 1 |
|         |          |           | 1 |
| 0.0091  | 0.001529 | 0.0009057 |   |
|         |          |           | 1 |
|         |          |           | 1 |
|         |          |           | 1 |
|         |          |           | 1 |
| 0.1643  | 0.1377   | 0.03113   |   |
| 0.3443  | 0.2847   | 0.2064    |   |
| 0.03679 | 0        | 0.05928   |   |
| 0.2109  | 0        | 0.3775    | 1 |
|         |          |           | 1 |
| 0.1208  | 0.1199   | 0.1394    |   |
| 0.7334  | 0.7457   | 0.6258    |   |
| 0.3057  | 0.2738   | 0.2442    |   |

VEP annotated somatic variants

|          |          |           |   |
|----------|----------|-----------|---|
| 0.3262   | 0.3793   | 0.3218    |   |
| 0.06521  | 0.06196  | 0.01482   |   |
| 0.4596   | 0.3736   | 0.48      |   |
| 0.1474   | 0.1391   | 0.2509    |   |
| 0.3095   | 0.3256   | 0.2955    |   |
| 0.4958   | 0.5337   | 0.6212    |   |
| 0.2375   | 0.3187   | 0.3886    |   |
| 0.225    | 0.222    | 0.2873    | 1 |
| 0.086    | 0.1095   | 0.1567    |   |
| 0.1242   | 0.1576   | 0.2928    |   |
| 0.1841   | 0.2261   | 0.3026    |   |
| 0.6066   | 0.6568   | 0.7102    | 1 |
| 0.09809  | 0.06575  | 0.07876   | 1 |
| 0.2014   | 0.1614   | 0.1215    | 1 |
| 0.3209   | 0.3906   | 0.3209    | 1 |
| 0.235    | 0.2232   | 0.3949    |   |
| 0.03746  | 0.01869  | 0.002922  | 1 |
| 0.00416  | 0.004335 | 0.0007925 | 1 |
| 0.1851   | 0.2159   | 0.3442    | 1 |
| 0.1094   | 0.1171   | 0.1023    | 1 |
| 0.01718  | 0.009434 | 0.01133   | 1 |
| 0.1708   | 0.1733   | 0.2323    | 1 |
| 0.132    | 0.1485   | 0.04206   |   |
| 0.005679 | 0.01757  | 0.006198  |   |
| 0.2853   | 0.2799   | 0.3598    |   |
| 0.3386   | 0.3299   | 0.349     | 1 |
| 0.1268   | 0.0791   | 0.02734   | 1 |
| 0.0181   | 0.01355  | 0.002328  |   |
| 0.5129   | 0.4774   | 0.2559    |   |
| 0.2655   | 0.2924   | 0.3541    |   |



VEP annotated somatic variants

|          |          |           |   |
|----------|----------|-----------|---|
| 0.3035   | 0.2834   | 0.308     | 1 |
| 0.002958 | 0        | 0         |   |
| 0.002619 | 0.001453 | 0.0001225 |   |
| 0.1943   | 0.1512   | 0.03933   |   |
| 0.2252   | 0.2      | 0.1631    | 1 |
| 0.1514   | 0.1612   | 0.1778    |   |
| 0.1845   | 0.1644   | 0.02423   | 1 |
| 0.3456   | 0.3804   | 0.2847    | 1 |
| 0.3214   | 0.3012   | 0.2351    |   |
| 0.6096   | 0.611    | 0.6013    |   |
| 0.1442   | 0.1988   | 0.264     |   |
| 0.06086  | 0.04118  | 0.01094   | 1 |
| 0.4199   | 0.4006   | 0.4468    |   |
| 0.6438   | 0.6922   | 0.7989    |   |
| 0        | 0        | 0.0007286 |   |
| 0.0274   | 0.02985  | 0.003031  |   |
| 0.2032   | 0.1902   | 0.1947    | 1 |
|          |          |           | 1 |
| 0.02448  | 0.01613  | 0.005343  |   |
| 0.1198   | 0.1393   | 0.06704   | 1 |
| 0.3756   | 0.3719   | 0.3371    | 1 |
|          |          |           | 1 |
| 0.1202   | 0.187    | 0.1276    |   |
| 0.3441   | 0.2407   | 0.2672    |   |
| 0.3596   | 0.3387   | 0.4388    |   |
| 0.08301  | 0.07061  | 0.08966   |   |
|          |          |           | 1 |
| 0.6833   | 0.698    | 0.6608    | 1 |
| 0.5445   | 0.6239   | 0.6695    |   |
| 0.6154   | 0.6526   | 0.7008    | 1 |
| 0.2454   | 0.2349   | 0.2709    | 1 |
| 0.189    | 0.1749   | 0.1787    |   |
| 0.5762   | 0.5263   | 0.5144    |   |

VEP annotated somatic variants

|          |          |          |   |
|----------|----------|----------|---|
| 0.1217   | 0.1239   | 0.1642   | 1 |
| 0.07601  | 0.08095  | 0.1452   | 1 |
| 0.5604   | 0.5635   | 0.4721   | 1 |
| 0.3267   | 0.3186   | 0.2452   |   |
| 0.8916   | 0.8862   | 0.8991   |   |
| 0.04607  | 0.03613  | 0.007591 |   |
|          |          |          | 1 |
| 0.207    | 0.1879   | 0.06418  |   |
| 0.2323   | 0.2521   | 0.2726   | 1 |
| 0.102    | 0.1203   | 0.2072   | 1 |
| 0.9092   | 0.8948   | 0.8288   | 1 |
|          |          |          | 1 |
| 0.3129   | 0.3199   | 0.4294   |   |
| 0.2714   | 0.2147   | 0.1784   |   |
|          |          |          | 1 |
| 0.4035   | 0.3458   | 0.3273   | 1 |
| 0.1764   | 0.1772   | 0.2125   | 1 |
| 0.01307  | 0.007267 | 0.001604 |   |
| 0.4192   | 0.4638   | 0.6637   | 1 |
| 0.2617   | 0.2705   | 0.1563   | 1 |
|          |          |          | 1 |
| 0.403    | 0.3801   | 0.3517   |   |
| 0.2092   | 0.2353   | 0.406    | 1 |
| 0.523    | 0.4986   | 0.4624   | 1 |
|          |          |          | 1 |
| 0.3952   | 0.3601   | 0.3152   | 1 |
| 0.1766   | 0.1792   | 0.1509   | 1 |
|          |          |          | 1 |
| 0.0696   | 0.06541  | 0.06534  | 1 |
| 0.3722   | 0.4889   | 0.3626   | 1 |
| 0.006536 | 0.002924 | 0.02468  |   |
| 0.1144   | 0.1326   | 0.1312   |   |
| 0.01197  | 0.01153  | 0.002015 |   |
| 0.6171   | 0.7308   | 0.5588   |   |
| 0.6064   | 0.587    | 0.644    |   |

VEP annotated somatic variants

|            |          |          |   |
|------------|----------|----------|---|
| 0.5569     | 0.5306   | 0.4773   |   |
| 0.4761     | 0.4607   | 0.4909   |   |
| 0.2393     | 0.21     | 0.2099   |   |
| 0.2907     | 0.3798   | 0.4286   | 1 |
| 0.2792     | 0.2637   | 0.2094   |   |
| 0.04188    | 0.07493  | 0.1856   | 1 |
| 0.4039     | 0.3136   | 0.3492   |   |
| 0.01278    | 0.01009  | 0.003108 | 1 |
| 0.00001899 | 0        | 0        |   |
| 0.714      | 0.7015   | 0.723    |   |
| 0.6995     | 0.6826   | 0.7131   |   |
| 0.2219     | 0.1513   | 0.06517  |   |
|            |          |          | 1 |
| 0.2461     | 0.2536   | 0.2292   |   |
| 0.4967     | 0.5017   | 0.5369   |   |
| 0.2546     | 0.2522   | 0.2625   | 1 |
|            |          |          | 1 |
| 0.6938     | 0.6647   | 0.6038   |   |
| 0.1625     | 0.1686   | 0.1795   |   |
| 0.4347     | 0.3545   | 0.2074   | 1 |
| 0.146      | 0.1369   | 0.1505   | 1 |
| 0.3097     | 0.281    | 0.2488   |   |
|            |          |          | 1 |
| 0.4358     | 0.5287   | 0.5706   | 1 |
| 0.1478     | 0.1159   | 0.03183  | 1 |
| 0.2796     | 0.3194   | 0.5179   |   |
| 0.001222   | 0        | 0        |   |
| 0.5816     | 0.5672   | 0.609    |   |
| 0.3202     | 0.3661   | 0.3836   |   |
| 0.2883     | 0.339    | 0.2641   |   |
| 0.2536     | 0.2764   | 0.2761   |   |
| 0.0001141  | 0        | 0        | 1 |
|            |          |          | 1 |
|            |          |          | 1 |
| 0.5029     | 0.5      | 0.5529   | 1 |
| 0.005304   | 0.005814 | 0.003396 |   |

VEP annotated somatic variants

|         |         |          |   |
|---------|---------|----------|---|
| 0.1581  | 0.1274  | 0.2755   | 1 |
|         |         |          | 1 |
| 0.5572  | 0.4355  | 0.5588   |   |
| 0.3842  | 0.5278  | 0.5122   |   |
| 0.04878 | 0.05814 | 0.06951  |   |
| 0.3386  | 0.3438  | 0.3298   |   |
| 0.07746 | 0.04746 | 0.03767  |   |
| 0.03472 | 0.05172 | 0.01305  |   |
| 0.01783 | 0.05217 | 0.09526  |   |
| 0.2503  | 0.2534  | 0.2362   |   |
| 0.6697  | 0.7097  | 0.7559   |   |
| 0.191   | 0.1949  | 0.1092   | 1 |
| 0.04908 | 0.04755 | 0.05967  |   |
| 0.3655  | 0.3923  | 0.1804   |   |
| 0.3711  | 0.4035  | 0.1692   |   |
| 0.2126  | 0.2462  | 0.3127   |   |
| 0.7359  | 0.7118  | 0.6869   | 1 |
| 0.1572  | 0.1529  | 0.1575   | 1 |
| 0.0371  | 0.02063 | 0.009311 | 1 |
|         |         |          | 1 |
|         |         |          | 1 |
| 0.01849 | 0.01208 | 0.003001 |   |
| 0.2396  | 0.2303  | 0.3229   |   |
| 0.3166  | 0.3665  | 0.3448   |   |
| 0.2306  | 0.2199  | 0.199    | 1 |
| 0.1131  | 0.09157 | 0.09182  | 1 |
|         |         |          | 1 |
| 0.07852 | 0.04467 | 0.03974  | 1 |
| 0.4941  | 0.4405  | 0.3718   | 1 |
| 0.1277  | 0.1083  | 0.0549   |   |
| 0.4663  | 0.4798  | 0.4001   | 1 |
|         |         |          | 1 |
|         |         |          | 1 |
| 0.2789  | 0.3026  | 0.3195   |   |

VEP annotated somatic variants

|         |         |          |   |
|---------|---------|----------|---|
| 0.2397  | 0.2246  | 0.1342   |   |
| 0.6519  | 0.6383  | 0.6927   | 1 |
| 0.6768  | 0.5952  | 0.2397   |   |
| 0.2727  | 0.2403  | 0.2738   | 1 |
| 0.4349  | 0.4597  | 0.3211   |   |
| 0.376   | 0.4035  | 0.289    |   |
| 0.3853  | 0.4236  | 0.3012   | 1 |
| 0.3577  | 0.3501  | 0.4623   |   |
| 0.6174  | 0.611   | 0.5487   |   |
| 0.4968  | 0.4919  | 0.4889   |   |
| 0.4975  | 0.4951  | 0.4865   |   |
| 0.07481 | 0.09545 | 0.06971  | 1 |
| 0.01834 | 0.02017 | 0.01628  | 1 |
| 0.07542 | 0.06902 | 0.01243  |   |
| 0.1961  | 0.1758  | 0.2333   | 1 |
| 0.09383 | 0.07493 | 0.06043  |   |
| 0.4478  | 0.429   | 0.4427   |   |
| 0.09367 | 0.1111  | 0.07048  | 1 |
| 0.5709  | 0.4833  | 0.3622   | 1 |
| 0.212   | 0.2049  | 0.1654   | 1 |
| 0.4326  | 0.471   | 0.6544   |   |
| 0.0271  | 0.02882 | 0.002804 |   |
| 0.3758  | 0.3497  | 0.2914   |   |
| 0.154   | 0.1473  | 0.138    |   |
| 0.163   | 0.1435  | 0.05425  | 1 |
| 0.1368  | 0.1075  | 0.05082  | 1 |
|         |         |          | 1 |
| 0.2667  | 0.3348  | 0.4015   |   |
| 0.1897  | 0.1715  | 0.1134   |   |
| 0.169   | 0.1627  | 0.281    |   |
| 0.5266  | 0.5     | 0.5328   | 1 |
| 0.28    | 0.3184  | 0.4225   |   |
| 0.7562  | 0.7472  | 0.6436   |   |
| 0.4344  | 0.3243  | 0.1682   |   |
| 0.1533  | 0.1206  | 0.133    |   |
| 0.01537 | 0.01014 | 0.003664 |   |
| 0.1033  | 0.09012 | 0.04913  |   |

VEP annotated somatic variants

|          |         |            |   |
|----------|---------|------------|---|
| 0.6034   | 0.5662  | 0.6087     |   |
| 0.3413   | 0.2971  | 0.2888     |   |
| 0.8394   | 0.8242  | 0.8508     |   |
| 0.3159   | 0.4222  | 0.4362     | 1 |
| 0.03241  | 0.02609 | 0.01256    |   |
| 0.6785   | 0.7248  | 0.7463     | 1 |
| 0.679    | 0.7248  | 0.748      | 1 |
| 0.4615   | 0.4725  | 0.4134     | 1 |
| 0.1869   | 0.1931  | 0.2479     |   |
| 0.2287   | 0.1947  | 0.1221     |   |
| 0.2193   | 0.1911  | 0.1247     |   |
| 0.001078 | 0       | 0.00009126 |   |
| 0.1112   | 0.1238  | 0.1257     |   |
| 0.2665   | 0.2725  | 0.3118     |   |
| 0.3112   | 0.3393  | 0.3432     |   |
|          |         |            | 1 |
| 0.4062   | 0.4193  | 0.5361     |   |
| 0.3011   | 0.2994  | 0.3577     |   |
| 0.6961   | 0.6551  | 0.6407     | 1 |
| 0.3199   | 0.3718  | 0.4486     |   |
| 0.01829  | 0.01235 | 0.03342    |   |
| 0.06175  | 0.04348 | 0.01317    | 1 |
| 0.2075   | 0.245   | 0.3686     |   |
| 0.02064  | 0.01732 | 0.0002989  | 1 |
|          |         |            | 1 |
|          |         |            | 1 |
| 0.0542   | 0.08213 | 0.1872     | 1 |
| 0.4919   | 0.5347  | 0.5387     |   |
| 0.7342   | 0.7391  | 0.6392     |   |
| 0.7602   | 0.7152  | 0.6305     |   |
| 0.2311   | 0.2161  | 0.2107     |   |
| 0.7705   | 0.7333  | 0.5925     | 1 |
|          |         |            | 1 |

VEP annotated somatic variants

|          |          |          |   |
|----------|----------|----------|---|
| 0.4131   | 0.4099   | 0.3189   | 1 |
| 0.3284   | 0.2333   | 0.09024  | 1 |
| 0.3719   | 0.3681   | 0.2898   | 1 |
| 0.3419   | 0.3763   | 0.3647   |   |
| 0.01008  | 0.005848 | 0        |   |
| 0.3848   | 0.4905   | 0.6038   | 1 |
| 0.4316   | 0.3709   | 0.304    | 1 |
| 0.5836   | 0.5548   | 0.5377   | 1 |
|          |          |          | 1 |
| 0.4024   | 0.4503   | 0.462    |   |
| 0.5261   | 0.5712   | 0.5766   | 1 |
|          |          |          | 1 |
| 0.0286   | 0.02035  | 0.003109 | 1 |
| 0.4032   | 0.3344   | 0.3347   |   |
| 0.241    | 0.2536   | 0.2343   |   |
| 0.3621   | 0.3473   | 0.2184   |   |
| 0.4127   | 0.3761   | 0.2521   |   |
| 0.02304  | 0.03026  | 0.01767  |   |
| 0.023    | 0.02882  | 0.01585  |   |
| 0.1764   | 0.1979   | 0.193    |   |
| 0.1756   | 0.1974   | 0.184    |   |
| 0.1548   | 0.1508   | 0.07631  |   |
| 0.1484   | 0.1052   | 0.05589  | 1 |
| 0.2907   | 0.2695   | 0.3493   |   |
| 0.07308  | 0.09422  | 0.1985   |   |
|          |          |          | 1 |
| 0.3118   | 0.2752   | 0.2732   | 1 |
| 0.1124   | 0.2097   | 0.2142   |   |
| 0.04583  | 0.1007   | 0.1434   |   |
| 0.1125   | 0.102    | 0.01515  |   |
| 0.009382 | 0.009542 | 0.01516  |   |
| 0.4698   | 0.4784   | 0.3201   |   |
| 0.1322   | 0.1369   | 0.08772  |   |
| 0.3527   | 0.3271   | 0.2359   |   |
|          |          |          | 1 |
| 0.5029   | 0.4966   | 0.5275   |   |
| 0.9549   | 0.9757   | 0.9993   |   |
| 0.1368   | 0.118    | 0.03272  |   |
| 0.1136   | 0.09416  | 0.1032   |   |
| 0.2697   | 0.2565   | 0.1986   |   |
| 0.2236   | 0.2122   | 0.2808   |   |
| 0.08864  | 0.05193  | 0.05357  | 1 |
| 0.3028   | 0.3333   | 0.4186   |   |

VEP annotated somatic variants

|          |         |         |   |
|----------|---------|---------|---|
| 0.1354   | 0.1667  | 0.1333  | 1 |
| 0.08871  | 0.0879  | 0.2153  | 1 |
| 0.5452   | 0.552   | 0.5764  |   |
| 0.5062   | 0.3781  | 0.203   | 1 |
| 0.4904   | 0.5587  | 0.5557  |   |
| 0.2436   | 0.4012  | 0.4504  |   |
| 0.1468   | 0.2393  | 0.3096  |   |
| 0.08294  | 0.1667  | 0.09878 |   |
| 0.3208   | 0.328   | 0.4263  |   |
| 0.2314   | 0.0625  | 0.1003  |   |
| 0.6361   | 0.6455  | 0.7246  |   |
| 0.2844   | 0.1942  | 0.1566  | 1 |
| 0.2844   | 0.2666  | 0.1765  |   |
| 0.04099  | 0.05769 | 0.05127 | 1 |
|          |         |         | 1 |
| 0.3261   | 0.2978  | 0.2745  |   |
| 0.04739  | 0       | 0.02469 |   |
| 0.1986   | 0.1475  | 0.0535  |   |
| 0.6034   | 0.5928  | 0.4968  |   |
| 0.336    | 0.4306  | 0.4967  | 1 |
|          |         |         | 1 |
| 0.7296   | 0.7873  | 0.8698  |   |
|          |         |         | 1 |
| 0.06134  | 0.05523 | 0.0113  |   |
| 0.6502   | 0.711   | 0.7751  |   |
| 0.03855  | 0.03395 | 0.01676 |   |
| 0.04733  | 0.05638 | 0.05684 |   |
| 0.04712  | 0.05491 | 0.05192 |   |
| 0.4705   | 0.4026  | 0.3603  | 1 |
| 0.4947   | 0.4452  | 0.5711  |   |
| 0.1286   | 0.1239  | 0.08666 |   |
| 0.1334   | 0.1254  | 0.07807 | 1 |
| 0.002797 | 0       | 0       | 1 |
| 0.01958  | 0.01012 | 0.03441 |   |
| 0.4487   | 0.4113  | 0.4627  |   |
| 0.6165   | 0.6153  | 0.6734  |   |
|          |         |         | 1 |



VEP annotated somatic variants

|           |          |          |   |
|-----------|----------|----------|---|
| 0.3915    | 0.3818   | 0.3736   |   |
| 0.1232    | 0.1437   | 0.07568  | 1 |
| 0.4688    | 0.4321   | 0.5467   | 1 |
| 0.3196    | 0.2538   | 0.2089   | 1 |
| 0.6488    | 0.6138   | 0.5671   |   |
| 0.2216    | 0.178    | 0.1678   | 1 |
| 0.06743   | 0.0538   | 0.04918  |   |
| 0.1319    | 0.1283   | 0.08433  |   |
| 0.1178    | 0.1036   | 0.02448  | 1 |
| 0.2701    | 0.2507   | 0.2478   |   |
| 0.5419    | 0.5652   | 0.4887   | 1 |
| 0.0004025 | 0        | 0        | 1 |
| 0.2776    | 0.3062   | 0.2532   |   |
| 0.3401    | 0.3353   | 0.3972   | 1 |
| 0.7682    | 0.7723   | 0.6681   |   |
| 0.3374    | 0.4092   | 0.476    | 1 |
|           |          |          | 1 |
| 0.2282    | 0.2205   | 0.2143   |   |
| 0.4494    | 0.4397   | 0.3691   | 1 |
| 0.3465    | 0.3226   | 0.1448   | 1 |
|           |          |          | 1 |
| 0.1438    | 0.1916   | 0.3236   |   |
| 0.1529    | 0.2176   | 0.4139   |   |
| 0.06755   | 0.06176  | 0.02281  |   |
| 0.4447    | 0.3991   | 0.3086   | 1 |
| 0.3374    | 0.4249   | 0.4841   | 1 |
| 0.005834  | 0.007205 | 0.001889 |   |
|           |          |          | 1 |
| 0.2344    | 0.1919   | 0.1352   | 1 |
| 0.2616    | 0.2791   | 0.2624   | 1 |
| 0.2641    | 0.2876   | 0.2596   | 1 |
| 0.06454   | 0.04038  | 0.01392  |   |
| 0.3089    | 0.2847   | 0.2732   |   |
|           |          |          | 1 |
| 0.0149    | 0.008798 | 0.003657 |   |

VEP annotated somatic variants

|           |          |            |   |
|-----------|----------|------------|---|
| 0.6433    | 0.6311   | 0.5423     |   |
| 0.125     | 0.1895   | 0.2134     |   |
| 0.216     | 0.2277   | 0.1659     | 1 |
| 0.2338    | 0.245    | 0.1132     |   |
| 0.8956    | 0.9247   | 0.9859     |   |
| 0.01046   | 0.008671 | 0.004456   |   |
| 0.02127   | 0.0177   | 0.004239   |   |
| 0.1478    | 0.1515   | 0.03592    |   |
| 0.5287    | 0.5394   | 0.4782     |   |
| 0.7269    | 0.7621   | 0.7051     |   |
| 0.1191    | 0.1177   | 0.1228     |   |
| 0.285     | 0.2928   | 0.2275     |   |
| 0.2584    | 0.2529   | 0.1886     |   |
| 0.4052    | 0.4064   | 0.3537     | 1 |
| 0.3466    | 0.3112   | 0.4061     |   |
| 0.4305    | 0.379    | 0.4054     |   |
| 0.3634    | 0.4092   | 0.4089     |   |
| 0.3674    | 0.3512   | 0.3434     |   |
| 0.2155    | 0.2064   | 0.2409     |   |
| 0.2703    | 0.2544   | 0.2137     |   |
| 0.08661   | 0.06324  | 0.04185    |   |
| 0.03568   | 0.04863  | 0.1188     |   |
| 0.002887  | 0.003049 | 0.003019   |   |
| 0.1225    | 0.1306   | 0.203      | 1 |
| 0.4334    | 0.3907   | 0.3105     |   |
| 0.3472    | 0.3377   | 0.3007     |   |
| 0.3466    | 0.3412   | 0.2968     |   |
| 0.00829   | 0.01884  | 0.005463   |   |
| 0.08345   | 0.1235   | 0.1173     |   |
| 0.0008591 | 0.001488 | 0.00006289 |   |
| 0.03971   | 0.01075  | 0.0303     |   |
| 0.1229    | 0.1841   | 0.3056     |   |
|           |          |            | 1 |
|           |          |            | 1 |
| 0.1065    | 0.1017   | 0.1514     |   |
| 0.3624    | 0.3939   | 0.4156     |   |

VEP annotated somatic variants

|                                       |                                       |                                         |                  |
|---------------------------------------|---------------------------------------|-----------------------------------------|------------------|
| 0.193<br>0.0004438                    | 0.1931<br>0                           | 0.1451<br>0.002382                      |                  |
| 0.6985<br>0.7362<br>0.6229            | 0.7<br>0.7783<br>0.5652               | 0.7323<br>0.7908<br>0.4685              | 1                |
| 0.2689                                | 0.2729                                | 0.2534                                  | 1                |
| 0.7415<br>0.6777<br>0.7263<br>0.02825 | 0.7566<br>0.7199<br>0.7507<br>0.03913 | 0.7646<br>0.7495<br>0.7696<br>0.03645   | 1<br>1<br>1<br>1 |
| 0.7126<br>0.5567                      | 0.7795<br>0.6181                      | 0.8695<br>0.661                         | 1                |
| 0.3686<br>0.3635                      | 0.4065<br>0.4078                      | 0.3964<br>0.4037                        | 1                |
| 0.721<br>0.2592                       | 0.7052<br>0.2757                      | 0.653<br>0.2861                         | 1<br>1<br>1      |
| 0.3093                                | 0.2833                                | 0.3598                                  |                  |
| 0.2369                                | 0.2581                                | 0.3045                                  |                  |
| 0.4865<br>0.01495<br>0.2278<br>0.2698 | 0.5215<br>0<br>0.2228<br>0.2471       | 0.5537<br>0.0002456<br>0.3264<br>0.1645 | 1                |
| 0.586<br>0.07949<br>0.0005706         | 0.5411<br>0.07854<br>0                | 0.5064<br>0.04352<br>0                  | 1                |
| 0.3137                                | 0.3783                                | 0.51                                    | 1                |
| 0.3407<br>0.03202                     | 0.3627<br>0.02193                     | 0.4246<br>0.003551                      |                  |
| 0.04315<br>0.02863                    | 0.09654<br>0.02344                    | 0.09553<br>0.01099                      |                  |

VEP annotated somatic variants

|           |          |            |   |
|-----------|----------|------------|---|
| 0.8489    | 0.8176   | 0.7906     |   |
| 0.4982    | 0.4789   | 0.3761     |   |
| 0.03784   | 0.05992  | 0.1153     |   |
| 0.7207    | 0.7486   | 0.6943     |   |
| 0.4233    | 0.4243   | 0.5559     |   |
| 0.1912    | 0.1789   | 0.2266     |   |
| 0.6917    | 0.6874   | 0.6985     |   |
| 0.3436    | 0.3333   | 0.2162     | 1 |
| 0.4613    | 0.4083   | 0.3609     |   |
| 0.324     | 0.2486   | 0.1275     |   |
| 0.4664    | 0.4856   | 0.5072     |   |
| 0.9082    | 0.8989   | 0.8544     |   |
| 0.01268   | 0.01228  | 0.002785   |   |
| 0.2624    | 0.3098   | 0.4398     |   |
| 0.3049    | 0.3221   | 0.2152     |   |
| 0.3051    | 0.3485   | 0.4636     |   |
| 0.03152   | 0.04899  | 0.05887    | 1 |
| 0.4233    | 0.4075   | 0.3741     |   |
| 0.1995    | 0.1806   | 0.1845     |   |
| 0.0005203 | 0        | 0.00009953 | 1 |
| 0.6232    | 0.6239   | 0.5447     | 1 |
| 0.0003865 | 0.002882 | 0.006462   |   |
| 0.002137  | 0.002793 | 0          |   |
| 0.06349   | 0.09644  | 0.08139    | 1 |
| 0.3143    | 0.2635   | 0.1866     |   |
| 0.1301    | 0.1103   | 0.1005     |   |
| 0.2632    | 0.2507   | 0.2485     |   |
| 0.1766    | 0.1662   | 0.2193     |   |
| 0.1296    | 0.1488   | 0.1502     | 1 |
| 0.3922    | 0.4425   | 0.3747     |   |
| 0.3601    | 0.4305   | 0.3821     | 1 |

VEP annotated somatic variants

|            |         |          |   |
|------------|---------|----------|---|
| 0.11       | 0.0625  | 0.04054  |   |
| 0.3636     | 0.4288  | 0.4839   |   |
| 0.2558     | 0.244   | 0.2939   |   |
| 0.3558     | 0.3372  | 0.3372   |   |
| 0.0678     | 0.0625  | 0.04144  | 1 |
| 0.006106   | 0.00463 | 0.004492 |   |
| 0.4187     | 0.5107  | 0.7166   |   |
| 0.3776     | 0.4831  | 0.5088   |   |
| 0.7213     | 0.7133  | 0.8133   |   |
| 0.5348     | 0.5566  | 0.63     | 1 |
| 0.3419     | 0.4026  | 0.5239   |   |
| 0.7863     | 0.8464  | 0.9236   |   |
| 0.3095     | 0.3962  | 0.5344   |   |
| 0.3611     | 0.3916  | 0.3833   |   |
| 0.02433    | 0.01765 | 0.006735 |   |
| 0.3777     | 0.3454  | 0.1837   |   |
|            |         |          | 1 |
| 0.2354     | 0.2046  | 0.1624   | 1 |
| 0.4022     | 0.3833  | 0.3242   | 1 |
| 0.6129     | 0.6527  | 0.723    | 1 |
| 0.4108     | 0.3947  | 0.317    | 1 |
| 0.5902     | 0.5953  | 0.6318   | 1 |
|            |         |          | 1 |
| 0.2589     | 0.3052  | 0.4507   |   |
| 0.3335     | 0.3212  | 0.3045   |   |
| 0.186      | 0.1325  | 0.1065   |   |
| 0.5042     | 0.5493  | 0.6218   |   |
| 0.5849     | 0.6094  | 0.6355   |   |
| 0.6246     | 0.5385  | 0.4986   |   |
| 0.7338     | 0.7225  | 0.7156   | 1 |
| 0.267      | 0.2277  | 0.2192   | 1 |
| 0.2939     | 0.2201  | 0.0962   |   |
| 0.157      | 0.1167  | 0.04242  | 1 |
|            |         |          | 1 |
| 0.3636     | 0.3207  | 0.2431   | 1 |
| 0.00002006 | 0       | 0        | 1 |
| 0.7575     | 0.6286  | 0.4769   | 1 |
|            |         |          | 1 |
|            |         |          | 1 |
| 0.5509     | 0.5239  | 0.4708   |   |
| 0.007339   | 0.01153 | 0.008899 | 1 |

VEP annotated somatic variants

|          |          |           |   |
|----------|----------|-----------|---|
| 0.104    | 0.1341   | 0.1738    |   |
| 0.04701  | 0.05132  | 0.0418    |   |
| 0.5213   | 0.4408   | 0.457     |   |
| 0.442    | 0.487    | 0.5672    | 1 |
| 0.4246   | 0.4577   | 0.5411    |   |
| 0.3299   | 0.3766   | 0.5271    |   |
| 0.3847   | 0.3987   | 0.5268    |   |
| 0.3318   | 0.381    | 0.5052    |   |
| 0.08427  | 0.04848  | 0.05754   |   |
| 0.01209  | 0.008955 | 0.0007433 |   |
| 0.01839  | 0.007246 | 0.003951  |   |
| 0.408    | 0.4072   | 0.3724    |   |
| 0.5427   | 0.5418   | 0.4168    |   |
| 0.1406   | 0.1369   | 0.1056    | 1 |
|          |          |           | 1 |
| 0.8232   | 0.7726   | 0.6377    | 1 |
|          |          |           | 1 |
| 0.2736   | 0.2647   | 0.3235    | 1 |
| 0.395    | 0.3714   | 0.2983    |   |
| 0.3015   | 0.264    | 0.2849    |   |
| 0.002535 | 0.008696 | 0.01256   | 1 |
| 0.01598  | 0.005848 | 0.004174  |   |
|          |          |           | 1 |
| 0.6613   | 0.5997   | 0.5327    |   |
| 0.1048   | 0.09091  | 0.08621   | 1 |
| 0.3457   | 0.3427   | 0.4277    |   |
|          |          |           | 1 |
| 0.5357   | 0.5332   | 0.4577    | 1 |
|          |          |           | 1 |
| 0.00354  | 0        | 0.003014  |   |
| 0.02222  | 0.02907  | 0.002598  |   |
| 0.03035  | 0.05814  | 0.0053    | 1 |
| 0.483    | 0.5206   | 0.3697    |   |
| 0.1494   | 0.1988   | 0.3117    |   |
| 0.06325  | 0.03247  | 0.01288   |   |
| 0.02393  | 0.02762  | 0.02783   |   |
| 0.3155   | 0.3387   | 0.3529    |   |
| 0.1113   | 0.1113   | 0.1663    |   |
| 0.0443   | 0.0177   | 0.002548  | 1 |
|          |          |           | 1 |
| 0.6863   | 0.7118   | 0.8225    | 1 |
|          |          |           | 1 |
| 0.1222   | 0.1667   | 0.3145    | 1 |
|          |          |           | 1 |
| 0.2031   | 0.1623   | 0.1566    | 1 |
| 0.0832   | 0.09845  | 0.1123    |   |
| 0.2242   | 0.2579   | 0.3989    | 1 |

VEP annotated somatic variants

|         |         |          |   |
|---------|---------|----------|---|
| 0.05114 | 0.06772 | 0.0949   | 1 |
| 0.6831  | 0.6257  | 0.6365   | 1 |
| 0.03439 | 0.0218  | 0.008965 |   |
| 0.1697  | 0.1441  | 0.1985   | 1 |
| 0.187   | 0.147   | 0.1401   |   |
| 0.04325 | 0.07609 | 0.1261   |   |
| 0.225   | 0.2222  | 0.2247   | 1 |
| 0.3626  | 0.4049  | 0.4025   |   |
| 0.1544  | 0.1637  | 0.1096   |   |
| 0.3893  | 0.5145  | 0.6391   |   |
| 0.694   | 0.7291  | 0.7121   |   |
| 0.1949  | 0.2912  | 0.2759   |   |
| 0.02452 | 0.03254 | 0.05621  | 1 |
| 0.222   | 0.2945  | 0.4375   |   |
|         |         |          | 1 |
| 0.549   | 0.6297  | 0.5443   |   |
| 0.06118 | 0.05764 | 0.0381   |   |
| 0.06356 | 0.05752 | 0.03715  |   |
| 0.08738 | 0.07396 | 0.05432  |   |
| 0.2788  | 0.2565  | 0.2333   |   |
| 0.3064  | 0.2861  | 0.2691   |   |
| 0.7868  | 0.7847  | 0.7265   |   |
| 0.02555 | 0.03324 | 0.01098  |   |
| 0.1779  | 0.1636  | 0.1051   |   |
|         |         |          | 1 |
| 0.1533  | 0.1797  | 0.2329   |   |
| 0.1891  | 0.2256  | 0.2663   |   |
|         |         |          | 1 |
| 0.08718 | 0.04574 | 0.03284  |   |
| 0.2625  | 0.2954  | 0.3673   |   |
| 0.1471  | 0.1816  | 0.3274   |   |
| 0.1809  | 0.1758  | 0.09508  | 1 |
| 0.08253 | 0.05469 | 0.01633  | 1 |
| 0.3652  | 0.412   | 0.3853   |   |
| 0.01452 | 0.01462 | 0.001596 |   |
| 0.3465  | 0.3276  | 0.4625   |   |
| 0.3713  | 0.353   | 0.2458   |   |

VEP annotated somatic variants

|            |         |         |   |
|------------|---------|---------|---|
| 0.1672     | 0.183   | 0.1906  |   |
| 0.1366     | 0.1313  | 0.1688  |   |
| 0.01785    | 0.01153 | 0.00317 | 1 |
| 0.06556    | 0.1037  | 0.0605  |   |
| 0.2358     | 0.1778  | 0.1205  | 1 |
| 0.00001886 | 0       | 0       | 1 |
| 0.3723     | 0.4539  | 0.4851  |   |
| 0.01296    | 0.00578 | 0       | 1 |
| 0.4829     | 0.4859  | 0.5661  |   |
| 0.2954     | 0.2834  | 0.3666  |   |
| 0.1863     | 0.1455  | 0.1322  | 1 |
|            |         |         | 1 |
| 0.4148     | 0.3483  | 0.326   | 1 |
| 0.4221     | 0.3422  | 0.3446  | 1 |
|            |         |         | 1 |
| 0.3717     | 0.431   | 0.4332  |   |
| 0.3029     | 0.3466  | 0.3777  |   |
| 0.4893     | 0.3375  | 0.2696  | 1 |
| 0.2846     | 0.2435  | 0.1925  |   |
| 0.1103     | 0.1441  | 0.2175  |   |
| 0.1271     | 0.1556  | 0.2212  |   |
| 0.3677     | 0.3052  | 0.1875  | 1 |
|            |         |         | 1 |
|            |         |         | 1 |
|            |         |         | 1 |
| 0.2053     | 0.2259  | 0.2278  |   |
| 0.4679     | 0.3862  | 0.2837  |   |
| 0.3918     | 0.3406  | 0.177   |   |
|            |         |         | 1 |
| 0.2146     | 0.1855  | 0.1031  |   |
| 0.2933     | 0.3452  | 0.3982  |   |
| 0.2373     | 0.1884  | 0.1115  | 1 |
| 0.05347    | 0.07781 | 0.07557 |   |
| 0.3259     | 0.2681  | 0.1579  | 1 |
|            |         |         | 1 |
| 0.4736     | 0.5     | 0.559   |   |
| 0.4053     | 0.4099  | 0.4549  |   |
| 0.1618     | 0.1794  | 0.1544  |   |
| 0.5144     | 0.4703  | 0.5147  |   |
|            |         |         | 1 |
|            |         |         | 1 |
|            |         |         | 1 |
| 0.1306     | 0.164   | 0.1838  |   |
| 0.1008     | 0.06812 | 0.03931 | 1 |
| 0.4304     | 0.4594  | 0.4249  | 1 |



VEP annotated somatic variants

|         |         |         |   |
|---------|---------|---------|---|
| 0.2509  | 0.2602  | 0.208   | 1 |
| 0.2784  | 0.2971  | 0.2647  | 1 |
|         |         |         | 1 |
| 0.622   | 0.6697  | 0.6551  |   |
| 0.4233  | 0.4188  | 0.36    | 1 |
| 0.3937  | 0.3815  | 0.345   | 1 |
| 0.5112  | 0.41    | 0.4158  | 1 |
| 0.4163  | 0.3939  | 0.361   | 1 |
| 0.4349  | 0.4316  | 0.3677  | 1 |
| 0.4255  | 0.4196  | 0.3701  | 1 |
|         |         |         | 1 |
| 0.3157  | 0.291   | 0.3011  |   |
| 0.5672  | 0.6142  | 0.599   |   |
| 0.4416  | 0.3644  | 0.4558  |   |
| 0.177   | 0.234   | 0.3413  |   |
| 0.2744  | 0.2434  | 0.1565  |   |
| 0.2851  | 0.3038  | 0.2794  | 1 |
| 0.3343  | 0.3284  | 0.4851  | 1 |
| 0.2961  | 0.2034  | 0.1543  | 1 |
| 0.4263  | 0.4545  | 0.4873  |   |
| 0.2558  | 0.1923  | 0.05758 |   |
| 0.1823  | 0.1792  | 0.09664 |   |
| 0.1207  | 0.1037  | 0.1199  | 1 |
| 0.1239  | 0.134   | 0.1439  | 1 |
| 0.6057  | 0.6058  | 0.5803  |   |
| 0.5625  | 0.5708  | 0.552   |   |
| 0.379   | 0.3598  | 0.3622  | 1 |
| 0.2919  | 0.2875  | 0.3178  |   |
| 0.2024  | 0.1925  | 0.2151  |   |
| 0.5971  | 0.6253  | 0.735   | 1 |
| 0.39    | 0.3728  | 0.3628  | 1 |
|         |         |         | 1 |
| 0.5831  | 0.5745  | 0.617   |   |
| 0.5739  | 0.5609  | 0.5823  |   |
| 0.5742  | 0.5621  | 0.5823  |   |
| 0.3033  | 0.3309  | 0.4017  |   |
| 0.4001  | 0.4234  | 0.4611  |   |
| 0.4557  | 0.3834  | 0.3026  |   |
|         |         |         | 1 |
| 0.2851  | 0.2907  | 0.2575  | 1 |
| 0.5913  | 0.5714  | 0.3803  | 1 |
| 0.07784 | 0.09524 | 0.02451 |   |
| 0.2933  | 0.3333  | 0.2711  |   |

VEP annotated somatic variants

|           |          |           |   |
|-----------|----------|-----------|---|
| 0.1062    | 0.08824  | 0.1634    |   |
| 0.0587    | 0.05977  | 0.04484   |   |
| 0.2241    | 0.216    | 0.2102    |   |
| 0.4774    | 0.4212   | 0.2554    |   |
| 0.1039    | 0.07276  | 0.02976   | 1 |
| 0.5654    | 0.5515   | 0.5728    |   |
| 0.3377    | 0.2116   | 0.1471    |   |
| 0.007728  | 0.005797 | 0.002198  |   |
| 0.007894  | 0.007205 | 0.002255  |   |
| 0.008609  | 0.007353 | 0.003099  |   |
| 0.4871    | 0.515    | 0.462     |   |
| 0.4       | 0.4841   | 0.5789    |   |
| 0.1591    | 0.2064   | 0.2977    |   |
| 0.2632    | 0.239    | 0.2116    |   |
| 0.9159    | 0.9537   | 0.9898    |   |
| 0.3577    | 0.4377   | 0.5794    |   |
| 0.3622    | 0.3163   | 0.2368    | 1 |
| 0.2076    | 0.2186   | 0.3252    |   |
| 0.3591    | 0.3631   | 0.1989    | 1 |
| 0.8472    | 0.8095   | 0.743     |   |
| 0.2922    | 0.2733   | 0.3142    |   |
| 0.7442    | 0.7248   | 0.7775    | 1 |
| 0.00708   | 0        | 0.0001363 |   |
| 0.0001777 | 0        | 0         | 1 |
| 0.5225    | 0.4709   | 0.5266    |   |
| 0.3979    | 0.3602   | 0.3688    |   |
| 0.1801    | 0.1243   | 0.07603   |   |
| 0.1709    | 0.1661   | 0.2022    |   |
| 0.5664    | 0.5783   | 0.4804    | 1 |
|           |          |           | 1 |
| 0.5478    | 0.565    | 0.559     |   |
| 0.3321    | 0.2818   | 0.2747    |   |
| 0.5704    | 0.5101   | 0.4326    |   |
| 0.4518    | 0.462    | 0.42      | 1 |
| 0.6678    | 0.6529   | 0.6012    |   |
| 0.8113    | 0.7162   | 0.6472    |   |
|           |          |           | 1 |
|           |          |           | 1 |

VEP annotated somatic variants

|            |         |            |   |
|------------|---------|------------|---|
| 0.353      | 0.3627  | 0.4703     |   |
| 0.5244     | 0.5148  | 0.4849     |   |
| 0.5329     | 0.5333  | 0.4556     |   |
| 0.3982     | 0.438   | 0.5015     |   |
| 0.008121   | 0.01195 | 0.004727   |   |
| 0.4155     | 0.4531  | 0.5416     |   |
| 0.373      | 0.3444  | 0.3423     |   |
| 0.3391     | 0.3559  | 0.2427     |   |
| 0.2155     | 0.25    | 0.2383     |   |
| 0.5007     | 0.4257  | 0.3745     |   |
| 0.7705     | 0.6338  | 0.3814     |   |
| 0.3996     | 0.4333  | 0.3406     |   |
| 0.411      | 0.4375  | 0.3308     |   |
| 0.6157     | 0.629   | 0.6732     |   |
| 0.627      | 0.6412  | 0.6763     |   |
| 0.2426     | 0.2837  | 0.2999     |   |
| 0.1815     | 0.1667  | 0.1023     |   |
| 0.8075     | 0.8084  | 0.7272     |   |
| 0.3833     | 0.4075  | 0.5362     |   |
| 0.08885    | 0.1036  | 0.1233     |   |
| 0.6518     | 0.5901  | 0.4921     |   |
| 0.3592     | 0.3991  | 0.5408     | 1 |
| 0.1311     | 0.1472  | 0.2225     | 1 |
| 0.002587   | 0       | 0.002685   | 1 |
| 0.00003446 | 0       | 0.00009084 | 1 |
| 0.5723     | 0.5542  | 0.4784     | 1 |
|            |         |            | 1 |
|            |         |            | 1 |
| 0.5409     | 0.5     | 0.4602     | 1 |
| 0.5437     | 0.4321  | 0.3355     | 1 |
| 0.2401     | 0.2867  | 0.3296     | 1 |
| 0.4456     | 0.3819  | 0.3786     |   |
| 0.3675     | 0.3957  | 0.342      |   |
| 0.9082     | 0.8833  | 0.9298     |   |
| 0.8807     | 0.875   | 0.8441     | 1 |

VEP annotated somatic variants

|           |          |          |   |
|-----------|----------|----------|---|
| 0.8793    | 0.8827   | 0.8477   | 1 |
| 0.001722  | 0.003205 | 0        |   |
| 0.00686   | 0.005556 | 0.007846 |   |
| 0.2692    | 0.247    | 0.2287   |   |
| 0.1268    | 0.111    | 0.04279  | 1 |
| 0.3124    | 0.3157   | 0.3743   | 1 |
| 0.2199    | 0.2147   | 0.226    |   |
| 0.2207    | 0.2174   | 0.2267   |   |
|           |          |          | 1 |
| 0.04831   | 0.04348  | 0.01863  |   |
| 0.1072    | 0.1064   | 0.0894   |   |
|           |          |          | 1 |
| 0.5566    | 0.5058   | 0.4416   | 1 |
| 0.5509    | 0.497    | 0.4498   | 1 |
|           |          |          | 1 |
|           |          |          | 1 |
| 0.1304    | 0.112    | 0.03923  |   |
| 0.004363  | 0.003145 | 0.001535 |   |
| 0.3226    | 0.3496   | 0.3169   |   |
| 0.4668    | 0.575    | 0.6489   |   |
| 0.1131    | 0.03968  | 0.02621  |   |
| 0.2166    | 0.2469   | 0.1966   |   |
| 0.2204    | 0.217    | 0.1411   |   |
|           |          |          | 1 |
| 0.09113   | 0.1081   | 0.1332   | 1 |
| 0.5837    | 0.5887   | 0.661    | 1 |
|           |          |          | 1 |
| 0.3555    | 0.3689   | 0.315    |   |
| 0.1306    | 0.08746  | 0.03637  |   |
| 0.0003519 | 0        | 0        |   |
| 0.1966    | 0.2054   | 0.1225   |   |
| 0.2069    | 0.2006   | 0.1605   |   |
| 0.4654    | 0.5752   | 0.6223   | 1 |
| 0.1717    | 0.1569   | 0.2444   |   |
| 0.2292    | 0.2168   | 0.2902   |   |
| 0.4439    | 0.5677   | 0.6337   | 1 |
| 0.7394    | 0.8026   | 0.8459   | 1 |
|           |          |          | 1 |
| 0.01547   | 0.01739  | 0.1054   |   |

VEP annotated somatic variants

|          |          |           |   |
|----------|----------|-----------|---|
| 0.4348   | 0.3851   | 0.502     |   |
| 0.7693   | 0.7882   | 0.893     |   |
| 0.1156   | 0.1453   | 0.1148    |   |
| 0.2421   | 0.2637   | 0.1711    |   |
| 0.2434   | 0.2118   | 0.1253    | 1 |
| 0.2207   | 0.2616   | 0.4042    |   |
| 0.07191  | 0.1106   | 0.1076    | 1 |
| 0.5018   | 0.4986   | 0.4649    |   |
| 0.06902  | 0.1023   | 0.09126   |   |
| 0.5246   | 0.6434   | 0.7197    |   |
|          |          |           | 1 |
|          |          |           | 1 |
| 0.2496   | 0.232    | 0.2006    | 1 |
| 0.002805 | 0.01304  | 0.0004337 |   |
| 0.4776   | 0.4819   | 0.4638    |   |
| 0.5634   | 0.5245   | 0.5534    |   |
| 0.05639  | 0.0806   | 0.1597    |   |
| 0.1289   | 0.1407   | 0.1627    |   |
|          |          |           | 1 |
|          |          |           | 1 |
| 0.03821  | 0.03583  | 0.01229   | 1 |
| 0.06906  | 0.08883  | 0.1527    |   |
| 0.009799 | 0.004323 | 0.004145  | 1 |
| 0.1457   | 0.1683   | 0.1057    |   |
| 0.3048   | 0.342    | 0.2999    |   |
| 0.4469   | 0.4286   | 0.3708    |   |
| 0.02398  | 0.02427  | 0.003442  |   |
| 0.7798   | 0.7966   | 0.7727    |   |
| 0.2892   | 0.2731   | 0.3016    |   |
| 0.2619   | 0.1739   | 0.1129    | 1 |
|          |          |           | 1 |
|          |          |           | 1 |

VEP annotated somatic variants

|          |          |           |   |
|----------|----------|-----------|---|
| 0.1683   | 0.1794   | 0.2487    |   |
| 0.6824   | 0.6707   | 0.6307    |   |
| 0.6164   | 0.5594   | 0.4527    |   |
| 0.002242 | 0.01064  | 0.001405  |   |
| 0.1814   | 0.2363   | 0.4589    |   |
| 0.6054   | 0.6633   | 0.6265    |   |
| 0.305    | 0.2543   | 0.2568    |   |
| 0.4922   | 0.5504   | 0.5825    | 1 |
| 0.3834   | 0.4333   | 0.4769    |   |
| 0.1756   | 0.2198   | 0.3379    |   |
| 0.5282   | 0.4568   | 0.389     |   |
| 0.06844  | 0.04678  | 0.04106   | 1 |
| 0.04276  | 0.03655  | 0.02431   | 1 |
| 0.1037   | 0.07205  | 0.09452   |   |
| 0.1471   | 0.1279   | 0.1224    |   |
| 0.2619   | 0.2752   | 0.2678    |   |
| 0.1085   | 0.1571   | 0.2122    | 1 |
|          |          |           | 1 |
| 0.2437   | 0.2032   | 0.1366    | 1 |
| 0.02765  | 0.02023  | 0.02213   |   |
| 0.4304   | 0.2881   | 0.2979    |   |
| 0.4609   | 0.3882   | 0.3034    |   |
| 0.4213   | 0.5144   | 0.768     |   |
| 0.01193  | 0.01207  | 0.0005475 |   |
| 0.2911   | 0.2736   | 0.151     |   |
| 0.3833   | 0.3343   | 0.4076    |   |
| 0.1002   | 0.09412  | 0.1465    |   |
| 0.1995   | 0.1737   | 0.04742   |   |
|          |          |           | 1 |
| 0.3774   | 0.3764   | 0.3229    |   |
| 0.3046   | 0.2977   | 0.318     |   |
| 0.03704  | 0.0276   | 0.00515   |   |
| 0.3782   | 0.3746   | 0.3754    |   |
| 0.486    | 0.5318   | 0.5803    | 1 |
| 0.005668 | 0.004264 | 0.008765  |   |
| 0.1879   | 0.2009   | 0.2028    |   |
|          |          |           | 1 |

VEP annotated somatic variants

|          |          |           |   |
|----------|----------|-----------|---|
| 0.6759   | 0.7263   | 0.5777    |   |
| 0.3303   | 0.3143   | 0.4377    |   |
| 0.2413   | 0.2131   | 0.1236    | 1 |
| 0.4123   | 0.4472   | 0.4761    |   |
| 0.01873  | 0.00597  | 0.004952  |   |
| 0.243    | 0.2939   | 0.2588    | 1 |
| 0.002967 | 0.001608 | 0.0008886 |   |
| 0.4615   | 0.4851   | 0.4733    |   |
| 0.04811  | 0.07205  | 0.07455   | 1 |
| 0.1339   | 0.134    | 0.2334    |   |
| 0.02811  | 0.01842  | 0.03382   |   |
| 0.0353   | 0.02017  | 0.01202   |   |
| 0.5189   | 0.4481   | 0.6638    |   |
| 0.2042   | 0.1959   | 0.1207    |   |
| 0.356    | 0.3995   | 0.667     | 1 |
| 0.003689 | 0.002915 | 0.001108  |   |
| 0.1985   | 0.2608   | 0.2427    |   |
| 0.6393   | 0.6773   | 0.661     |   |
| 0.4058   | 0.3862   | 0.3913    |   |
| 0.2827   | 0.3      | 0.2707    |   |
| 0.2581   | 0.2986   | 0.4149    |   |
| 0.2532   | 0.2896   | 0.4018    |   |
| 0.3045   | 0.3055   | 0.4377    |   |
| 0.3051   | 0.3199   | 0.4526    |   |
| 0.1881   | 0.175    | 0.2141    |   |
| 0.2604   | 0.2536   | 0.2427    | 1 |
| 0.587    | 0.6282   | 0.614     |   |
| 0.2862   | 0.3046   | 0.2915    |   |
| 0.08272  | 0.0634   | 0.03236   |   |
| 0.2299   | 0.2694   | 0.2917    | 1 |
| 0.04199  | 0.01741  | 0.007378  |   |
| 0.01417  | 0.01324  | 0.002057  |   |
| 0.7352   | 0.7572   | 0.7924    |   |

VEP annotated somatic variants

|            |          |           |   |
|------------|----------|-----------|---|
| 0.3601     | 0.3517   | 0.3807    | 1 |
| 0.000484   | 0        | 0.00051   |   |
| 0.01336    | 0.007426 | 0.0000844 |   |
| 0.2056     | 0.2215   | 0.2554    |   |
|            |          |           | 1 |
| 0.2195     | 0.1424   | 0.02824   |   |
| 0.4307     | 0.4333   | 0.4141    | 1 |
|            |          |           | 1 |
| 0.1371     | 0.1225   | 0.1022    | 1 |
| 0.1673     | 0.1455   | 0.1114    | 1 |
|            |          |           | 1 |
| 0.2421     | 0.1807   | 0.04665   |   |
|            |          |           | 1 |
| 0.181      | 0.1477   | 0.2814    |   |
| 0.2065     | 0.2556   | 0.2459    |   |
| 0.4215     | 0.366    | 0.3712    |   |
|            |          |           | 1 |
| 0.001197   | 0.005618 | 0.0002535 |   |
| 0.3091     | 0.3934   | 0.3588    |   |
| 0.462      | 0        | 0.5366    |   |
| 0.4433     | 0.5882   | 0.5847    |   |
| 0.3972     | 0.4104   | 0.3877    |   |
| 0.3076     | 0.3344   | 0.2732    |   |
| 0.1123     | 0.1164   | 0.03591   |   |
|            |          |           | 1 |
|            |          |           | 1 |
| 0.5839     | 0.5997   | 0.6538    |   |
|            |          |           | 1 |
| 0.001154   | 0        | 0         |   |
|            |          |           | 1 |
| 0.3432     | 0.4032   | 0.3769    |   |
| 0.00001969 | 0        | 0.0002662 |   |
| 0.2039     | 0.1652   | 0.1314    |   |
| 0.2499     | 0.2317   | 0.2335    | 1 |
| 0.2312     | 0.2944   | 0.2679    |   |
| 0.8258     | 0.7826   | 0.8246    |   |
| 0.358      | 0.3783   | 0.359     |   |
| 0.6302     | 0.6875   | 0.6855    |   |
|            |          |           | 1 |
| 0.002528   | 0        | 0.0006006 |   |
| 0.01167    | 0.008646 | 0.01505   | 1 |
| 0.03124    | 0.0245   | 0.01396   | 1 |
| 0.5976     | 0.6614   | 0.699     |   |



VEP annotated somatic variants

|          |          |           |   |
|----------|----------|-----------|---|
| 0.6882   | 0.7003   | 0.7754    |   |
|          |          |           | 1 |
| 0.000843 | 0.00436  | 0.0001859 |   |
| 0.04059  | 0.05187  | 0.08978   |   |
|          |          |           | 1 |
| 0.3704   | 0.3473   | 0.3584    | 1 |
| 0.732    | 0.6185   | 0.5564    |   |
|          |          |           | 1 |
| 0.3373   | 0.3329   | 0.3183    | 1 |
| 0.3286   | 0.3348   | 0.3162    | 1 |
| 0.6702   | 0.6455   | 0.5912    | 1 |
| 0.5865   | 0.5882   | 0.5673    | 1 |
| 0.5333   | 0.5304   | 0.5102    |   |
| 0.01397  | 0.01475  | 0.006543  |   |
| 0.001653 | 0.001475 | 0         |   |
|          |          |           | 1 |
|          |          |           | 1 |
| 0.07089  | 0.05405  | 0.1248    |   |
|          |          |           |   |
| 0.1813   | 0.2238   | 0.1738    | 1 |
| 0.4727   | 0.4688   | 0.3407    |   |
| 0.2264   | 0.2075   | 0.2286    |   |
| 0.1541   | 0.1811   | 0.2403    |   |
| 0.1799   | 0.203    | 0.2038    |   |
| 0.05045  | 0.07781  | 0.09447   |   |
| 0.007467 | 0        | 0.002549  |   |
| 0.01236  | 0.0132   | 0.002613  | 1 |
| 0.3856   | 0.3869   | 0.415     |   |
| 0.4932   | 0.4522   | 0.4158    |   |
|          |          |           |   |
| 0.2566   | 0.2832   | 0.3092    |   |
| 0.3658   | 0.43     | 0.3905    |   |
| 0.6307   | 0.5533   | 0.3811    |   |
| 0.02991  | 0.01087  | 0.01319   |   |
| 0.2668   | 0.3951   | 0.4445    |   |
| 0.5191   | 0.5794   | 0.6211    |   |
| 0.2018   | 0.3115   | 0.3651    |   |
| 0.1253   | 0.09194  | 0.06535   |   |

VEP annotated somatic variants

|            |         |          |   |
|------------|---------|----------|---|
| 0.03599    | 0.02083 | 0.01377  |   |
| 0.00001864 | 0       | 0        |   |
| 0.5833     | 0.5288  | 0.607    |   |
| 0.06001    | 0.07391 | 0.01947  |   |
| 0.185      | 0.2055  | 0.1307   | 1 |
| 0.1144     | 0.1835  | 0.1156   | 1 |
| 0.1085     | 0.1203  | 0.1027   | 1 |
| 0.5231     | 0.5813  | 0.6944   |   |
| 0.03042    | 0.03026 | 0.05627  |   |
| 0.07846    | 0.09448 | 0.1297   | 1 |
| 0.4934     | 0.5494  | 0.4745   |   |
| 0.3082     | 0.4006  | 0.6003   |   |
| 0.5221     | 0.5482  | 0.5762   |   |
| 0.1613     | 0.1838  | 0.2698   |   |
| 0.2146     | 0.2702  | 0.3936   | 1 |
| 0.186      | 0.1801  | 0.2714   |   |
| 0.2761     | 0.354   | 0.5414   |   |
| 0.3549     | 0.3858  | 0.4133   |   |
| 0.4931     | 0.5612  | 0.6405   |   |
| 0.5273     | 0.5504  | 0.5891   |   |
| 0.3581     | 0.375   | 0.2727   |   |
| 0.4048     | 0.2949  | 0.1035   |   |
| 0.01213    | 0.00436 | 0.004278 |   |
| 0.363      | 0.415   | 0.423    |   |
| 0.3293     | 0.3187  | 0.2408   |   |
| 0.8158     | 0.768   | 0.635    | 1 |
| 0.2536     | 0.2444  | 0.2392   |   |
| 0.4115     | 0.4204  | 0.3977   |   |

VEP annotated somatic variants

| <b>FILTER</b>  | <b>flanking_bps</b> | <b>variant_id</b> | <b>variant_qual</b> |
|----------------|---------------------|-------------------|---------------------|
| PASS           | TCT                 | .                 | .                   |
| common_variant | CTG                 | rs10978447        | .                   |
| PASS           | GGC                 | rs279677          | .                   |
| common_variant | TAT                 | rs11077414        | .                   |
| PASS           | CCT                 | .                 | .                   |
| PASS           | TTT                 | rs2041171         | .                   |
| common_variant | GAG                 | rs2364315         | .                   |
| common_variant | TAT                 | rs6501947         | .                   |
| PASS           | CTG                 | rs554012320       | .                   |
| PASS           | CGCC                | rs55685226        | .                   |
| common_variant | CCC                 | rs1799859         | .                   |
| common_variant | GCG                 | .                 | .                   |
| common_variant | CGT                 | rs12600864        | .                   |
| common_variant | GTT                 | rs740250          | .                   |
| common_variant | GCC                 | rs144177905       | .                   |
| PASS           | GCT                 | .                 | .                   |
| PASS           | CCT                 | rs1251075         | .                   |
| PASS           | GCG                 | rs41291346        | .                   |
| PASS           | TTT                 | rs41303309        | .                   |
| PASS           | AGA                 | rs747166030       | .                   |
| common_variant | CGT                 | rs11039146        | .                   |
| common_variant | CGC                 | rs13087169        | .                   |
| common_variant | GGG                 | rs12915634        | .                   |
| PASS           | ACA                 | rs61729367        | .                   |
| PASS           | TCC                 | rs7485573         | .                   |
| PASS           | AGC                 | .                 | .                   |
| common_variant | CCC                 | rs41264285        | .                   |
| PASS           | CCT                 | rs35431407        | .                   |
| common_variant | GCT                 | rs12774070        | .                   |
| common_variant | GAG                 | rs2251105         | .                   |
| common_variant | GTAA                | rs752944731       | .                   |
| common_variant | ACG                 | rs3813622         | .                   |
| common_variant | GAG                 | rs75553188        | .                   |
| common_variant | TAT                 | rs56778727        | .                   |
| common_variant | CTCTGTCCTCCCCCTA    | rs67418568        | .                   |
| PASS           | CCT                 | rs41282522        | .                   |
| common_variant | ATT                 | rs621375          | .                   |
| common_variant | ATG                 | rs342467          | .                   |
| common_variant | GGA                 | rs34463921        | .                   |
| PASS           | GTG                 | rs200527701       | .                   |
| common_variant | CTG                 | rs12671813        | .                   |
| common_variant | TCC                 | rs5182            | .                   |
| PASS           | ATT                 | rs13218824        | .                   |
| PASS           | GGA                 | rs8050390         | .                   |
| common_variant | CTT                 | rs1053192         | .                   |
| PASS           | CCG                 | rs7517559         | .                   |
| common_variant | CCC                 | rs72649360        | .                   |
| common_variant | ACC                 | rs62619924        | .                   |
| common_variant | CCG                 | rs878081          | .                   |
| PASS           | TTT                 | rs1003854         | .                   |
| common_variant | TCA                 | rs733957          | .                   |
| PASS           | GCA                 | rs17164315        | .                   |
| common_variant | TCT                 | rs4732036         | .                   |
| PASS           | ACA                 | .                 | .                   |

VEP annotated somatic variants

|                |          |             |   |
|----------------|----------|-------------|---|
| common_variant | CGT      | rs62128062  | . |
| common_variant | GTC      | rs4646686   | . |
| PASS           | CCG      | rs1051713   | . |
| PASS           | TAG      | rs55736017  | . |
| common_variant | ACC      | rs2289140   | . |
| PASS           | ATA      | rs1626649   | . |
| common_variant | AAT      | rs1793173   | . |
| common_variant | ACG      | rs56780932  | . |
| common_variant | GTG      | rs2304872   | . |
| common_variant | TATTTTTA | rs3067424   | . |
| common_variant | CGC      | rs4938014   | . |
| PASS           | CGC      | rs35235926  | . |
| common_variant | CTT      | rs7853994   | . |
| common_variant | GTT      | rs7096505   | . |
| common_variant | AAG      | rs7630642   | . |
| common_variant | AGG      | rs11578772  | . |
| common_variant | TCG      | rs871130    | . |
| PASS           | ACG      | rs115250350 | . |
| PASS           | TTA      | .           | . |
| PASS           | GCG      | .           | . |
| PASS           | ATG      | rs2301587   | . |
| PASS           | AGA      | rs140072315 | . |
| PASS           | ACG      | rs755049876 | . |
| PASS           | AGG      | .           | . |
| PASS           | CCC      | rs74869251  | . |
| PASS           | TGG      | .           | . |
| common_variant | CTG      | rs71428454  | . |
| common_variant | CAG      | rs71428453  | . |
| PASS           | TAG      | rs455671    | . |
| common_variant | AGT      | rs17138632  | . |
| PASS           | CTGGG    | .           | . |
| common_variant | TAT      | rs2276932   | . |
| common_variant | AAG      | rs793524    | . |
| common_variant | TTG      | rs10521763  | . |
| common_variant | CCT      | rs62620965  | . |
| PASS           | GCT      | rs16837847  | . |
| PASS           | CGG      | rs7550948   | . |
| PASS           | CCG      | rs74404550  | . |
| common_variant | AAG      | rs3772219   | . |
| common_variant | ATA      | rs2296354   | . |
| PASS           | AAT      | rs10972173  | . |
| common_variant | GGT      | rs12359433  | . |
| PASS           | ACT      | rs6778511   | . |
| common_variant | ACT      | rs963618    | . |
| common_variant | TAG      | rs5951332   | . |
| PASS           | AGG      | rs2361298   | . |
| common_variant | ACC      | rs3174476   | . |
| common_variant | CAT      | rs28365160  | . |
| PASS           | CCA      | rs2305738   | . |
| common_variant | GGA      | rs28597966  | . |
| common_variant | GCC      | rs6151415   | . |
| PASS           | CTG      | .           | . |
| common_variant | ACG      | rs2257090   | . |
| PASS           | AAT      | rs62251997  | . |
| common_variant | ACTG     | rs143019035 | . |

VEP annotated somatic variants

|                |     |             |   |
|----------------|-----|-------------|---|
| PASS           | GGA | .           | . |
| PASS           | GGG | rs1872858   | . |
| common_variant | CCG | rs9895872   | . |
| common_variant | CGG | rs1168966   | . |
| PASS           | CAG | rs749457    | . |
| PASS           | AGA | rs11790014  | . |
| common_variant | CGT | rs8086318   | . |
| PASS           | AAT | .           | . |
| common_variant | GAC | rs12125325  | . |
| common_variant | TGT | rs45570436  | . |
| PASS           | AGC | rs36048052  | . |
| common_variant | CGG | rs56290406  | . |
| common_variant | CCT | rs17846715  | . |
| common_variant | TCT | rs12131640  | . |
| common_variant | CCG | rs1891      | . |
| PASS           | AGA | rs2853759   | . |
| common_variant | TCT | rs113968994 | . |
| PASS           | GTG | .           | . |
| PASS           | GGA | rs6021355   | . |
| common_variant | CGA | rs3827032   | . |
| common_variant | CAT | rs6442124   | . |
| common_variant | GCG | rs35725751  | . |
| common_variant | TCC | rs1152194   | . |
| common_variant | CAG | rs2281933   | . |
| common_variant | GAT | rs11577579  | . |
| common_variant | CAC | rs11374767  | . |
| common_variant | CGC | rs36686     | . |
| PASS           | CCA | rs7210438   | . |
| PASS           | CGC | .           | . |
| common_variant | CGG | rs309370    | . |
| common_variant | GTG | rs45500792  | . |
| PASS           | GTT | rs73137012  | . |
| common_variant | ACG | rs12388749  | . |
| PASS           | AGA | rs741886    | . |
| PASS           | GTA | .           | . |
| PASS           | CGT | rs34233512  | . |
| common_variant | AAT | rs41308602  | . |
| PASS           | GAG | rs536159058 | . |
| PASS           | AGG | rs62207506  | . |
| common_variant | AGG | rs193243275 | . |
| PASS           | ACG | rs3092994   | . |
| PASS           | CCG | rs8176235   | . |
| PASS           | TGC | rs273900734 | . |
| PASS           | CCT | rs2126042   | . |
| common_variant | ACG | rs13153992  | . |
| common_variant | TGT | rs2836972   | . |
| common_variant | CAT | rs2273376   | . |
| common_variant | GTG | rs2283569   | . |
| PASS           | GCC | rs28992474  | . |
| PASS           | AGA | rs11200559  | . |
| common_variant | GGC | rs986178    | . |
| PASS           | TTC | .           | . |
| PASS           | GCC | .           | . |
| common_variant | CGC | rs6601166   | . |
| common_variant | TAT | rs11652816  | . |

VEP annotated somatic variants

|                |               |             |   |
|----------------|---------------|-------------|---|
| PASS           | CCA           | .           | . |
| common_variant | ATG           | rs12411843  | . |
| PASS           | CGC           | rs7079392   | . |
| PASS           | GGT           | rs3740694   | . |
| common_variant | CTG           | rs10507274  | . |
| common_variant | ACG           | rs2111146   | . |
| common_variant | ACTAT         | rs139293175 | . |
| PASS           | CTGAGAG       | rs112580616 | . |
| PASS           | TGT           | rs2302315   | . |
| common_variant | ATG           | rs730228    | . |
| common_variant | GTG           | rs8110590   | . |
| common_variant | TTA           | rs2304176   | . |
| common_variant | TAT           | rs17261572  | . |
| common_variant | CAA           | rs10927267  | . |
| PASS           | AATAATT       | rs148512971 | . |
| PASS           | GTT           | rs6688703   | . |
| common_variant | TGT           | rs41289218  | . |
| common_variant | CTA           | rs11077410  | . |
| PASS           | GGT           | .           | . |
| PASS           | CTC           | .           | . |
| common_variant | CGG           | rs366510    | . |
| PASS           | ACA           | .           | . |
| common_variant | AAT           | rs41260544  | . |
| common_variant | AGA           | rs2269067   | . |
| common_variant | ATT           | rs665728    | . |
| PASS           | ACG           | rs139255231 | . |
| common_variant | CAT           | rs2286634   | . |
| common_variant | CGA           | rs149154082 | . |
| common_variant | CCT           | rs62231971  | . |
| PASS           | ATACACACA     | .           | . |
| common_variant | CAC           | rs7034745   | . |
| PASS           | CCT           | rs77802779  | . |
| PASS           | TCC           | .           | . |
| common_variant | CCT           | rs2239801   | . |
| PASS           | GTT           | rs11014511  | . |
| PASS           | GGA           | rs187651793 | . |
| PASS           | CCA           | rs7797991   | . |
| PASS           | CGT           | .           | . |
| common_variant | GGG           | rs41291299  | . |
| PASS           | AGT           | rs734348    | . |
| common_variant | ACG           | rs343989    | . |
| common_variant | GCT           | rs62113420  | . |
| PASS           | ACG           | rs6925778   | . |
| PASS           | ACG           | rs2493145   | . |
| common_variant | ACC           | rs181863983 | . |
| common_variant | CTC           | rs738304    | . |
| common_variant | CGC           | rs2304134   | . |
| PASS           | CCA           | rs11574685  | . |
| PASS           | GGC           | rs3747622   | . |
| PASS           | GGA           | .           | . |
| PASS           | TCC           | rs8106895   | . |
| common_variant | TCG           | rs1974763   | . |
| common_variant | ACT           | rs74901418  | . |
| common_variant | TAATATGAATACA | rs11280083  | . |
| common_variant | CGT           | rs35352238  | . |

VEP annotated somatic variants

|                |                  |             |   |
|----------------|------------------|-------------|---|
| common_variant | ATC              | rs920791    | . |
| PASS           | CGC              | .           | . |
| common_variant | AAT              | rs144266211 | . |
| PASS           | ATG              | rs74002500  | . |
| common_variant | AAG              | rs146524252 | . |
| PASS           | CTC              | .           | . |
| PASS           | TCC              | rs3762117   | . |
| common_variant | CGT              | rs670650    | . |
| common_variant | GGC              | rs11653797  | . |
| PASS           | GGA              | .           | . |
| common_variant | TGT              | rs11234627  | . |
| PASS           | CCC              | rs3136658   | . |
| common_variant | CGC              | rs3092960   | . |
| common_variant | AAT              | rs2351528   | . |
| common_variant | TGTG             | rs58161637  | . |
| common_variant | CAT              | rs11265493  | . |
| PASS           | CCTG             | rs55682471  | . |
| common_variant | AAA              | rs735482    | . |
| PASS           | AAT              | rs4844390   | . |
| common_variant | AGGGCAGAGGCTGCTC | rs779696544 | . |
| PASS           | GCT              | .           | . |
| PASS           | CTC              | rs561895    | . |
| common_variant | GGG              | rs2073760   | . |
| common_variant | TTG              | rs3749191   | . |
| PASS           | ACA              | rs368295466 | . |
| PASS           | GGC              | rs2272211   | . |
| common_variant | GCC              | rs2069529   | . |
| PASS           | GAT              | .           | . |
| common_variant | CAG              | rs56087852  | . |
| PASS           | CCG              | .           | . |
| common_variant | TCG              | rs13043456  | . |
| common_variant | AGG              | rs1265045   | . |
| common_variant | GAC              | rs2302399   | . |
| PASS           | CGT              | rs143775364 | . |
| PASS           | CAA              | rs5828129   | . |
| PASS           | ACC              | rs2231496   | . |
| PASS           | TAT              | rs2300687   | . |
| common_variant | CGT              | rs5747211   | . |
| PASS           | GTA              | rs2244682   | . |
| common_variant | CTC              | rs75243280  | . |
| common_variant | ATAT             | rs56066672  | . |
| common_variant | CGA              | rs41285260  | . |
| PASS           | CCA              | rs117156562 | . |
| PASS           | GTC              | .           | . |
| PASS           | ATT              | rs62269547  | . |
| common_variant | ACA              | rs6766818   | . |
| common_variant | ACT              | rs1673607   | . |
| PASS           | TAG              | .           | . |
| PASS           | CAG              | rs2270202   | . |
| PASS           | TTA              | .           | . |
| common_variant | TCA              | rs1061170   | . |
| common_variant | AGA              | rs1800136   | . |
| common_variant | TTA              | rs111775228 | . |
| common_variant | CGC              | rs1890042   | . |
| PASS           | CGC              | rs2291254   | . |

VEP annotated somatic variants

|                |        |             |   |
|----------------|--------|-------------|---|
| PASS           | ATC    | rs12832244  | . |
| common_variant | GCG    | rs11556868  | . |
| PASS           | CTA    | rs2302764   | . |
| common_variant | GGG    | rs582736    | . |
| common_variant | GCG    | rs4781019   | . |
| common_variant | TGC    | rs7012      | . |
| PASS           | TGC    | rs278126    | . |
| common_variant | GGT    | rs3012627   | . |
| common_variant | TTC    | rs34054011  | . |
| PASS           | GCC    | .           | . |
| PASS           | TGG    | rs34398185  | . |
| PASS           | CCG    | .           | . |
| common_variant | GTT    | rs11834597  | . |
| common_variant | TTT    | rs559165    | . |
| PASS           | AGG    | .           | . |
| common_variant | GCG    | rs3817012   | . |
| common_variant | AGT    | rs2305450   | . |
| PASS           | CGT    | .           | . |
| PASS           | GGA    | rs3829211   | . |
| common_variant | CGT    | rs11540994  | . |
| PASS           | TAT    | rs1660694   | . |
| common_variant | CCG    | rs1049353   | . |
| PASS           | CCG    | rs13068264  | . |
| common_variant | CAT    | rs3779032   | . |
| common_variant | TAT    | rs3779031   | . |
| PASS           | CTT    | rs72760251  | . |
| common_variant | CCT    | rs1129262   | . |
| common_variant | GAA    | rs2303793   | . |
| common_variant | CAT    | rs62482495  | . |
| PASS           | GGG    | .           | . |
| PASS           | ACC    | rs2973747   | . |
| PASS           | ATT    | rs7538391   | . |
| PASS           | ATA    | rs17128726  | . |
| common_variant | CGC    | rs17393069  | . |
| common_variant | CTC    | rs2295915   | . |
| PASS           | GGA    | .           | . |
| common_variant | GTG    | rs2839077   | . |
| PASS           | TTTTGT | .           | . |
| common_variant | TCA    | rs4818      | . |
| common_variant | TAT    | rs10927335  | . |
| PASS           | TGT    | .           | . |
| PASS           | ACG    | rs117188117 | . |
| PASS           | TCA    | rs1564823   | . |
| common_variant | CAT    | rs17618     | . |
| common_variant | TGG    | rs10760282  | . |
| common_variant | AAT    | rs8192494   | . |
| PASS           | AGA    | .           | . |
| PASS           | ACA    | rs3821157   | . |
| common_variant | AGG    | rs488132    | . |
| PASS           | CAA    | .           | . |
| common_variant | TAA    | rs147910113 | . |
| PASS           | AAA    | rs1506441   | . |
| common_variant | TCA    | rs974572    | . |
| common_variant | CCC    | rs2515838   | . |
| PASS           | AAA    | .           | . |



VEP annotated somatic variants

|                |         |             |   |
|----------------|---------|-------------|---|
| common_variant | CAG     | rs1127643   | . |
| common_variant | GGG     | rs11699220  | . |
| common_variant | ACG     | rs4502229   | . |
| common_variant | ATT     | rs3750863   | . |
| common_variant | TCA     | rs2297581   | . |
| common_variant | CGA     | rs41289311  | . |
| common_variant | TAC     | rs12248333  | . |
| common_variant | CAG     | rs41274912  | . |
| PASS           | TCT     | rs10231075  | . |
| PASS           | CGG     | rs782154947 | . |
| common_variant | CAT     | rs2304858   | . |
| common_variant | TCG     | rs6433817   | . |
| common_variant | TGT     | rs659040    | . |
| PASS           | TCG     | .           | . |
| PASS           | CCT     | .           | . |
| PASS           | AGG     | rs35206429  | . |
| PASS           | GTT     | rs1709082   | . |
| PASS           | CCC     | rs1709081   | . |
| PASS           | CTAAA   | .           | . |
| common_variant | CCG     | rs16995376  | . |
| common_variant | ACG     | rs4729021   | . |
| common_variant | CGG     | rs198430    | . |
| PASS           | ATT     | rs687670    | . |
| common_variant | TAA     | rs2622733   | . |
| PASS           | AAC     | rs1056142   | . |
| common_variant | ATA     | rs10409785  | . |
| PASS           | CGC     | rs55681834  | . |
| common_variant | CAT     | rs1431196   | . |
| common_variant | CGA     | rs9467075   | . |
| PASS           | TCA     | .           | . |
| common_variant | CAA     | rs4742      | . |
| PASS           | TTG     | rs531346334 | . |
| common_variant | ATG     | rs41313157  | . |
| common_variant | TGA     | rs17416794  | . |
| PASS           | GAA     | rs10739633  | . |
| common_variant | TCC     | rs952374    | . |
| PASS           | AGT     | rs9942410   | . |
| PASS           | GGG     | rs5993488   | . |
| PASS           | GGC     | rs374861176 | . |
| common_variant | CCG     | rs2275874   | . |
| PASS           | TTT     | .           | . |
| common_variant | ACG     | rs4072887   | . |
| common_variant | CTG     | rs9915640   | . |
| PASS           | TAT     | rs55956367  | . |
| common_variant | AGT     | rs2271958   | . |
| PASS           | ATC     | rs72792311  | . |
| PASS           | GGA     | .           | . |
| PASS           | TGTCACT | rs3082917   | . |
| PASS           | AAC     | rs3082      | . |
| PASS           | ACG     | rs11588937  | . |
| PASS           | TGG     | rs10096210  | . |
| PASS           | AAT     | rs17146082  | . |
| common_variant | GAC     | rs2281868   | . |
| common_variant | TGG     | rs41274582  | . |
| PASS           | ACG     | rs72857275  | . |

VEP annotated somatic variants

|                |         |             |   |
|----------------|---------|-------------|---|
| PASS           | GCC     | rs11084816  | . |
| common_variant | CAT     | rs12221039  | . |
| PASS           | TTC     | .           | . |
| common_variant | AAT     | rs4234394   | . |
| PASS           | GCG     | rs12034925  | . |
| common_variant | CTT     | rs12042900  | . |
| PASS           | CAA     | rs1995482   | . |
| PASS           | ATT     | rs79984676  | . |
| common_variant | AAT     | rs41304141  | . |
| PASS           | GGT     | rs12951733  | . |
| PASS           | CTT     | .           | . |
| common_variant | TTT     | rs12948962  | . |
| common_variant | GTG     | rs41267309  | . |
| common_variant | TGT     | rs41298531  | . |
| PASS           | GTGG    | .           | . |
| PASS           | GCG     | rs6884561   | . |
| PASS           | ACA     | rs2306431   | . |
| common_variant | CGG     | rs2286329   | . |
| common_variant | CGA     | rs1126464   | . |
| common_variant | CAC     | rs2304175   | . |
| PASS           | TCT     | .           | . |
| common_variant | ACA     | rs61935050  | . |
| common_variant | CCA     | rs76390929  | . |
| common_variant | ACC     | rs3213505   | . |
| common_variant | AGG     | rs3747280   | . |
| PASS           | AGA     | rs5967281   | . |
| common_variant | CGT     | rs2276343   | . |
| PASS           | AATATTT | rs140490580 | . |
| common_variant | CCA     | rs7234288   | . |
| common_variant | GCC     | rs36101975  | . |
| common_variant | TCC     | rs56148603  | . |
| PASS           | TTT     | .           | . |
| PASS           | CGT     | rs34278949  | . |
| PASS           | AAG     | rs369225897 | . |
| common_variant | ATA     | rs191289705 | . |
| common_variant | GGG     | rs4236506   | . |
| common_variant | CGA     | rs1005887   | . |
| common_variant | GAG     | rs770087    | . |
| common_variant | AGA     | rs62467724  | . |
| PASS           | ATG     | rs313407    | . |
| PASS           | AAA     | rs1782383   | . |
| PASS           | CGC     | .           | . |
| common_variant | GGT     | rs1076669   | . |
| common_variant | ACC     | rs6750085   | . |
| common_variant | TCT     | rs35443668  | . |
| PASS           | ACA     | rs1919691   | . |
| PASS           | TCA     | .           | . |
| common_variant | AGT     | rs2070699   | . |
| PASS           | AAG     | .           | . |
| PASS           | TGA     | rs61933720  | . |
| PASS           | CTA     | rs310618    | . |
| PASS           | GGT     | .           | . |
| PASS           | TAT     | rs56380058  | . |
| PASS           | CTTCTCT | rs111797029 | . |
| common_variant | GCC     | rs10848906  | . |

VEP annotated somatic variants

|                |     |             |   |
|----------------|-----|-------------|---|
| common_variant | TCC | rs17180771  | . |
| PASS           | AGA | rs188362092 | . |
| common_variant | CAG | rs2120276   | . |
| common_variant | ACG | rs36018672  | . |
| common_variant | CCG | rs2181440   | . |
| common_variant | CGA | rs2071857   | . |
| common_variant | CGA | rs8142615   | . |
| common_variant | CAA | rs7292751   | . |
| PASS           | CCT | rs2239691   | . |
| PASS           | GGG | .           | . |
| common_variant | ACT | rs709683    | . |
| PASS           | TAC | rs2252767   | . |
| PASS           | TAT | rs1871685   | . |
| common_variant | ATC | rs2250718   | . |
| common_variant | CGA | rs2273707   | . |
| common_variant | GAA | rs2273706   | . |
| common_variant | GCG | rs79126103  | . |
| PASS           | CAT | rs10760503  | . |
| PASS           | ACC | .           | . |
| common_variant | ATT | rs3176889   | . |
| PASS           | GCG | rs145747095 | . |
| PASS           | GCC | .           | . |
| common_variant | GGT | rs6971720   | . |
| common_variant | CAT | rs2234922   | . |
| common_variant | GCG | rs13439459  | . |
| PASS           | CCA | rs16947425  | . |
| PASS           | AAG | rs2272313   | . |
| common_variant | GGG | rs10935282  | . |
| common_variant | TGT | rs1801591   | . |
| common_variant | CGT | rs1130426   | . |
| common_variant | CCG | rs3810381   | . |
| PASS           | CCA | rs41286811  | . |
| common_variant | GCG | rs2307003   | . |
| PASS           | CCG | rs12975442  | . |
| PASS           | TAA | rs79643517  | . |
| common_variant | CCG | rs1076871   | . |
| PASS           | TTG | .           | . |
| common_variant | TGA | rs1047840   | . |
| PASS           | GGC | .           | . |
| common_variant | TTT | rs56194802  | . |
| common_variant | CGT | rs1800291   | . |
| common_variant | TCA | rs7058826   | . |
| PASS           | AGT | .           | . |
| common_variant | CTG | rs4030473   | . |
| common_variant | GCG | rs174589    | . |
| common_variant | ACG | rs174453    | . |
| common_variant | GTG | rs733679    | . |
| common_variant | CGT | rs6007594   | . |
| PASS           | ACA | .           | . |
| PASS           | CAT | .           | . |
| common_variant | CGG | rs2475853   | . |
| common_variant | GGC | rs62599865  | . |
| common_variant | ATT | rs61703386  | . |
| common_variant | TGA | rs41305290  | . |
| common_variant | TGA | rs1939383   | . |

VEP annotated somatic variants

|                |           |             |   |
|----------------|-----------|-------------|---|
| PASS           | TCA       | rs3780      | . |
| common_variant | TTG       | rs3733577   | . |
| PASS           | CCT       | rs942482434 | . |
| PASS           | GAA       | rs916668    | . |
| PASS           | GCA       | rs2075566   | . |
| common_variant | CCT       | rs10793625  | . |
| common_variant | AGC       | rs771204    | . |
| common_variant | GAG       | rs9358802   | . |
| common_variant | GCT       | rs11555275  | . |
| PASS           | AGA       | .           | . |
| common_variant | AAA       | rs7757405   | . |
| PASS           | CAT       | rs3800377   | . |
| common_variant | CAG       | rs4713867   | . |
| common_variant | CTT       | rs1052583   | . |
| common_variant | ATC       | rs16843671  | . |
| PASS           | TCG       | rs2240482   | . |
| common_variant | GGC       | rs41283365  | . |
| PASS           | GGT       | rs17848937  | . |
| common_variant | GGT       | rs17848935  | . |
| PASS           | ACG       | rs1127678   | . |
| common_variant | CCG       | rs190206480 | . |
| common_variant | TGG       | rs34167077  | . |
| PASS           | CGC       | rs4883569   | . |
| common_variant | AGA       | rs2066913   | . |
| common_variant | CGA       | rs10973387  | . |
| PASS           | CAG       | rs28401636  | . |
| PASS           | CGC       | rs553196851 | . |
| PASS           | GGC       | rs7630741   | . |
| PASS           | GGA       | .           | . |
| PASS           | TCA       | rs11119925  | . |
| common_variant | CGG       | rs2287854   | . |
| common_variant | CGG       | rs351855    | . |
| common_variant | AGT       | rs1049636   | . |
| PASS           | GTT       | rs1893433   | . |
| common_variant | ACG       | rs3744903   | . |
| PASS           | ACG       | rs1893434   | . |
| common_variant | TGG       | rs2231901   | . |
| PASS           | ATA       | .           | . |
| common_variant | TGT       | rs56301507  | . |
| common_variant | AGC       | rs6704545   | . |
| common_variant | CGT       | rs36051194  | . |
| PASS           | TAA       | rs2177153   | . |
| PASS           | TGG       | rs3214903   | . |
| PASS           | ATG       | rs12122068  | . |
| PASS           | CGG       | rs6686353   | . |
| common_variant | CCG       | rs1800822   | . |
| common_variant | GCGGTGGTG | rs67450550  | . |
| PASS           | GCG       | rs7929014   | . |
| common_variant | TCT       | rs294883    | . |
| common_variant | CCC       | rs381639    | . |
| common_variant | ATC       | rs2293783   | . |
| PASS           | CGC       | rs4714489   | . |
| PASS           | CTT       | rs10106     | . |
| common_variant | ATG       | rs345514    | . |
| PASS           | TCT       | rs35583270  | . |

VEP annotated somatic variants

|                |      |             |   |
|----------------|------|-------------|---|
| common_variant | ACG  | rs11098194  | . |
| common_variant | CGT  | rs17457087  | . |
| common_variant | CAA  | rs34505482  | . |
| common_variant | GGA  | rs1545437   | . |
| PASS           | ACC  | rs74123100  | . |
| PASS           | TTC  | .           | . |
| PASS           | CGT  | rs57337277  | . |
| common_variant | ACG  | rs117877479 | . |
| common_variant | CTC  | rs838137    | . |
| common_variant | TAT  | rs9807877   | . |
| common_variant | CTC  | rs529623    | . |
| PASS           | CTT  | rs1994490   | . |
| PASS           | ACA  | .           | . |
| common_variant | ACG  | rs1564281   | . |
| PASS           | GAGG | rs3830208   | . |
| common_variant | CGG  | rs12432149  | . |
| PASS           | GAA  | rs76999174  | . |
| common_variant | GCA  | rs76743658  | . |
| common_variant | CAC  | rs4958733   | . |
| common_variant | TGC  | rs2288101   | . |
| common_variant | CTA  | rs10849133  | . |
| common_variant | CGT  | rs1468556   | . |
| common_variant | CTT  | rs16962977  | . |
| common_variant | CGC  | rs16962974  | . |
| PASS           | GGT  | rs35950532  | . |
| PASS           | GGA  | .           | . |
| PASS           | AGG  | rs3806338   | . |
| common_variant | CAG  | rs76346754  | . |
| common_variant | GGG  | rs61729628  | . |
| common_variant | TCG  | rs5384      | . |
| common_variant | TAC  | rs71548508  | . |
| common_variant | TAG  | rs17057536  | . |
| PASS           | GCA  | rs2293      | . |
| common_variant | ATC  | rs9971293   | . |
| PASS           | GAC  | rs10136536  | . |
| PASS           | CAC  | rs181881694 | . |
| common_variant | GCG  | rs1254898   | . |
| common_variant | GCG  | rs11083455  | . |
| common_variant | CGC  | rs56854837  | . |
| common_variant | CGG  | rs79309130  | . |
| common_variant | TGG  | rs147513433 | . |
| common_variant | CGT  | rs6076347   | . |
| common_variant | TGC  | rs2303275   | . |
| common_variant | ATG  | rs2303278   | . |
| PASS           | CGG  | .           | . |
| common_variant | CGC  | rs1049346   | . |
| common_variant | ATG  | rs4907817   | . |
| common_variant | TTC  | rs12844618  | . |
| common_variant | CGT  | rs79806135  | . |
| PASS           | ATT  | rs11229655  | . |
| PASS           | TAA  | rs4852349   | . |
| common_variant | ACG  | rs1805058   | . |
| common_variant | GCG  | rs5748449   | . |
| common_variant | TGC  | rs4986942   | . |
| common_variant | CGA  | rs12823938  | . |

VEP annotated somatic variants

|                |       |              |   |
|----------------|-------|--------------|---|
| common_variant | GTC   | rs2243093    | . |
| common_variant | CGT   | rs2274020    | . |
| common_variant | TAT   | rs2793442    | . |
| PASS           | CTCGC | .            | . |
| PASS           | GGG   | .            | . |
| common_variant | ACG   | rs1190736    | . |
| common_variant | TGC   | rs4838684    | . |
| PASS           | ACC   | rs147825070  | . |
| common_variant | CGC   | rs11101914   | . |
| common_variant | CGC   | rs12219529   | . |
| common_variant | CCG   | rs77245879   | . |
| common_variant | ATG   | rs10893053   | . |
| PASS           | TTC   | rs62265406   | . |
| PASS           | CCG   | rs2748338    | . |
| PASS           | TGA   | rs34212133   | . |
| PASS           | TGT   | rs116870369  | . |
| PASS           | TTA   | .            | . |
| common_variant | AGG   | rs3828595    | . |
| common_variant | AGC   | rs4475186    | . |
| common_variant | CTC   | rs41312596   | . |
| common_variant | CCT   | rs7614915    | . |
| PASS           | GGG   | rs34108640   | . |
| common_variant | ACG   | rs76463933   | . |
| PASS           | GCG   | rs974285     | . |
| common_variant | GCC   | rs1871042    | . |
| common_variant | ACG   | rs72681249   | . |
| PASS           | TCG   | rs12356612   | . |
| common_variant | CGT   | rs41260144   | . |
| PASS           | TGC   | rs616218     | . |
| common_variant | ACC   | rs1052278    | . |
| common_variant | GTA   | rs17676826   | . |
| PASS           | TGG   | .            | . |
| PASS           | TAC   | rs34922454   | . |
| common_variant | GTC   | rs6580637    | . |
| PASS           | CCT   | rs1052948632 | . |
| common_variant | AGC   | rs2243388    | . |
| common_variant | CCG   | rs2379206    | . |
| common_variant | CGT   | rs56351858   | . |
| common_variant | GGA   | rs16833972   | . |
| common_variant | CCG   | rs3738541    | . |
| common_variant | GTG   | rs4720951    | . |
| PASS           | ATA   | .            | . |
| PASS           | TTA   | .            | . |
| PASS           | AAT   | rs12220588   | . |
| common_variant | TTG   | rs10882474   | . |
| common_variant | GCG   | rs2232253    | . |
| PASS           | CCA   | .            | . |
| common_variant | TCA   | rs1799945    | . |
| common_variant | GCT   | rs148714837  | . |
| common_variant | AGG   | rs74648342   | . |
| common_variant | AGG   | rs12436072   | . |
| common_variant | ACG   | rs12164      | . |
| PASS           | GCA   | .            | . |
| PASS           | CCG   | rs16891397   | . |
| PASS           | ACA   | rs77463023   | . |

VEP annotated somatic variants

|                |         |             |   |
|----------------|---------|-------------|---|
| common_variant | TGG     | rs3752419   | . |
| PASS           | CTCC    | .           | . |
| common_variant | CCT     | rs14362     | . |
| common_variant | CCG     | rs2073420   | . |
| PASS           | AATTTT  | rs546127026 | . |
| common_variant | TGG     | rs1131488   | . |
| PASS           | CGA     | rs2272790   | . |
| common_variant | GGC     | rs1053593   | . |
| common_variant | GTG     | rs2071190   | . |
| PASS           | GGC     | rs77856552  | . |
| common_variant | GCA     | rs35337531  | . |
| common_variant | CGC     | rs3830343   | . |
| common_variant | GGG     | rs3737243   | . |
| PASS           | GGC     | .           | . |
| common_variant | CTG     | rs6320      | . |
| common_variant | TTG     | rs6638360   | . |
| common_variant | ACG     | rs200650762 | . |
| common_variant | ACG     | rs11558819  | . |
| PASS           | AAG     | .           | . |
| common_variant | TAT     | rs1048710   | . |
| PASS           | GGT     | rs540557518 | . |
| PASS           | TAG     | rs12904700  | . |
| common_variant | AGT     | rs866484    | . |
| common_variant | CTT     | rs1051393   | . |
| PASS           | AAT     | rs33982004  | . |
| PASS           | ATC     | rs609207    | . |
| common_variant | TTA     | rs2297370   | . |
| PASS           | TGT     | rs2274849   | . |
| PASS           | GCG     | rs34297802  | . |
| common_variant | ATT     | rs1128617   | . |
| common_variant | CAT     | rs4830219   | . |
| PASS           | AGG     | .           | . |
| PASS           | CGG     | rs6782002   | . |
| common_variant | ACT     | rs36052974  | . |
| common_variant | AAT     | rs9848979   | . |
| common_variant | TTA     | rs61886896  | . |
| PASS           | CAGCCTA | rs139927942 | . |
| common_variant | TCA     | rs1063110   | . |
| common_variant | TTGGG   | rs57179462  | . |
| common_variant | GGA     | rs146644651 | . |
| PASS           | GCC     | rs41268137  | . |
| PASS           | TCA     | rs12722600  | . |
| PASS           | CAC     | rs143249661 | . |
| common_variant | CGG     | rs3842752   | . |
| PASS           | AAG     | rs3741211   | . |
| common_variant | ACG     | rs2059806   | . |
| common_variant | CTC     | rs2860177   | . |
| common_variant | AGG     | rs11761394  | . |
| PASS           | GTT     | .           | . |
| PASS           | TGA     | .           | . |
| PASS           | GAG     | rs3797390   | . |
| PASS           | TGCC    | .           | . |
| common_variant | CCA     | rs2291919   | . |
| PASS           | CCT     | rs75282194  | . |
| common_variant | TGG     | rs34051422  | . |

VEP annotated somatic variants

|                |             |             |   |
|----------------|-------------|-------------|---|
| PASS           | TAT         | rs1109216   | . |
| common_variant | TTA         | rs2274617   | . |
| common_variant | GTT         | rs2305586   | . |
| common_variant | TGT         | rs3821909   | . |
| PASS           | ATT         | rs2239547   | . |
| common_variant | ACA         | rs2276817   | . |
| PASS           | ATG         | rs2240917   | . |
| common_variant | TAT         | rs1751134   | . |
| common_variant | CTA         | rs41307668  | . |
| PASS           | TCG         | rs7957289   | . |
| PASS           | ATG         | .           | . |
| common_variant | CCC         | rs78399616  | . |
| common_variant | TGA         | rs34043167  | . |
| common_variant | CGC         | rs2298681   | . |
| PASS           | GGA         | rs2073366   | . |
| PASS           | CCT         | rs11098988  | . |
| PASS           | GGC         | rs5952987   | . |
| common_variant | TAC         | rs9419380   | . |
| common_variant | CGT         | rs13214720  | . |
| common_variant | CCA         | rs2076056   | . |
| common_variant | CCG         | rs742099    | . |
| common_variant | TCTTT       | rs10545425  | . |
| PASS           | CCT         | rs17369029  | . |
| PASS           | GAG         | rs41289438  | . |
| common_variant | CGC         | rs17855078  | . |
| common_variant | CGT         | rs10889315  | . |
| common_variant | CCA         | rs9800580   | . |
| common_variant | CGG         | rs1611775   | . |
| PASS           | CCA         | .           | . |
| common_variant | TGA         | rs16885430  | . |
| common_variant | CCA         | rs12706859  | . |
| common_variant | TGG         | rs80095910  | . |
| PASS           | AGA         | rs9534059   | . |
| common_variant | CGT         | rs41300795  | . |
| PASS           | AGG         | .           | . |
| common_variant | CCT         | rs141093070 | . |
| PASS           | AGA         | .           | . |
| common_variant | ACG         | rs2230018   | . |
| common_variant | ACC         | rs59225858  | . |
| common_variant | CTT         | rs1062277   | . |
| common_variant | CGT         | rs6950119   | . |
| common_variant | AGT         | rs11913944  | . |
| PASS           | ACA         | rs68107102  | . |
| common_variant | GTC         | rs7764091   | . |
| PASS           | ATACACACACA | rs147073742 | . |
| common_variant | TGG         | rs138496842 | . |
| PASS           | TTA         | rs757731918 | . |
| common_variant | ACA         | rs114902761 | . |
| common_variant | CGT         | rs12046928  | . |
| PASS           | CCG         | rs72852205  | . |
| PASS           | AGT         | .           | . |
| PASS           | CCA         | .           | . |
| PASS           | AGCTC       | .           | . |
| common_variant | GAT         | rs16862956  | . |
| common_variant | CTT         | rs3736968   | . |



VEP annotated somatic variants

|                |      |             |   |
|----------------|------|-------------|---|
| common_variant | CTG  | rs11552577  | . |
| common_variant | GAT  | rs202185247 | . |
| PASS           | TTA  | .           | . |
| PASS           | TTT  | .           | . |
| PASS           | CTG  | rs149140699 | . |
| common_variant | CCG  | rs9418941   | . |
| common_variant | GAT  | rs7307735   | . |
| common_variant | CCG  | rs10953283  | . |
| PASS           | CGC  | rs190427523 | . |
| PASS           | GCG  | rs34946378  | . |
| PASS           | AGG  | .           | . |
| common_variant | TGA  | rs2604958   | . |
| PASS           | CTC  | rs2071602   | . |
| common_variant | GTC  | rs463217    | . |
| common_variant | CTG  | rs9306112   | . |
| common_variant | CAG  | rs9984726   | . |
| common_variant | GCG  | rs73176644  | . |
| PASS           | TTCC | rs3841288   | . |
| PASS           | CAT  | .           | . |
| PASS           | AGC  | rs9374309   | . |
| common_variant | GGG  | rs6908219   | . |
| common_variant | CGT  | rs2296300   | . |
| PASS           | ATG  | rs6672093   | . |
| PASS           | TGA  | rs2296299   | . |
| common_variant | CCC  | rs684527    | . |
| common_variant | CAG  | rs3798761   | . |
| PASS           | TGT  | .           | . |
| PASS           | TCT  | .           | . |
| PASS           | GGG  | rs6695528   | . |
| PASS           | TGT  | rs11610822  | . |
| common_variant | CCG  | rs893239    | . |
| common_variant | TCG  | rs36068997  | . |
| PASS           | CGG  | rs575867042 | . |
| common_variant | GCG  | rs7258841   | . |
| PASS           | CCC  | .           | . |
| common_variant | TGT  | rs7334674   | . |
| PASS           | GTA  | .           | . |
| PASS           | TATT | .           | . |
| common_variant | CTG  | rs3813933   | . |
| common_variant | CAC  | rs182548747 | . |
| common_variant | CTC  | rs2304720   | . |
| common_variant | TAT  | rs9877192   | . |
| PASS           | TTA  | rs10771166  | . |
| common_variant | ACG  | rs13387241  | . |
| common_variant | GCG  | rs2242339   | . |
| common_variant | CGC  | rs138879160 | . |
| PASS           | AGG  | rs139839409 | . |
| common_variant | TTC  | rs1741547   | . |
| PASS           | GAG  | rs2354444   | . |
| common_variant | GCC  | rs7094610   | . |
| common_variant | AAT  | rs78140568  | . |
| PASS           | CTA  | .           | . |
| common_variant | CAG  | rs34423045  | . |
| common_variant | CGA  | rs36006556  | . |
| PASS           | AAT  | rs7745      | . |

VEP annotated somatic variants

|                |        |             |   |
|----------------|--------|-------------|---|
| PASS           | TCA    | rs2839146   | . |
| PASS           | AGA    | rs2274800   | . |
| PASS           | ATG    | rs75340045  | . |
| PASS           | TGA    | rs4130852   | . |
| PASS           | ACT    | rs41308397  | . |
| common_variant | GTT    | rs807023    | . |
| common_variant | TCG    | rs752974    | . |
| common_variant | GGA    | rs73048940  | . |
| common_variant | ATA    | rs2908989   | . |
| PASS           | GGG    | rs2070945   | . |
| common_variant | GTC    | rs2233055   | . |
| PASS           | CCT    | .           | . |
| common_variant | TTT    | rs5953637   | . |
| common_variant | TCG    | rs3765272   | . |
| PASS           | TCT    | .           | . |
| PASS           | GGA    | .           | . |
| common_variant | GCC    | rs113311895 | . |
| common_variant | ACA    | rs2142887   | . |
| common_variant | GTA    | rs6894260   | . |
| common_variant | CAA    | rs2301796   | . |
| PASS           | CCC    | .           | . |
| common_variant | GCG    | rs5909299   | . |
| PASS           | ACA    | rs74430817  | . |
| common_variant | GAG    | rs56072295  | . |
| PASS           | TAT    | rs55715763  | . |
| PASS           | CAGGGT | rs72288687  | . |
| PASS           | TTG    | rs2290689   | . |
| common_variant | ATG    | rs1078264   | . |
| common_variant | CCC    | rs4502771   | . |
| common_variant | CGG    | rs2072788   | . |
| common_variant | AAA    | rs2270969   | . |
| common_variant | TGG    | rs2250213   | . |
| common_variant | GCA    | rs13204070  | . |
| PASS           | ACC    | .           | . |
| PASS           | CCA    | .           | . |
| common_variant | CGA    | rs61751446  | . |
| PASS           | GCT    | .           | . |
| common_variant | CTG    | rs616836    | . |
| PASS           | GTC    | rs3745480   | . |
| common_variant | TGC    | rs147500056 | . |
| PASS           | GCC    | .           | . |
| common_variant | CGC    | rs368622121 | . |
| PASS           | CAT    | rs673408    | . |
| PASS           | TAT    | rs147500027 | . |
| common_variant | ACT    | rs1263792   | . |
| common_variant | CCG    | rs13023973  | . |
| common_variant | AGG    | rs878493    | . |
| common_variant | CGC    | rs8081793   | . |
| PASS           | CGT    | rs8067585   | . |
| common_variant | TCG    | rs79286496  | . |
| common_variant | TCT    | rs12917     | . |
| common_variant | ATA    | rs3213927   | . |
| PASS           | GGG    | rs2289718   | . |
| common_variant | CAT    | rs3747032   | . |
| PASS           | CCT    | rs73492943  | . |

VEP annotated somatic variants

|                |         |             |   |
|----------------|---------|-------------|---|
| common_variant | GAG     | rs142531662 | . |
| PASS           | GTG     | rs2302320   | . |
| common_variant | ACC     | rs7964786   | . |
| PASS           | CAT     | rs10489691  | . |
| common_variant | CCT     | rs2227261   | . |
| common_variant | CGC     | rs7922546   | . |
| common_variant | CCT     | rs77813062  | . |
| common_variant | TTC     | rs141042584 | . |
| PASS           | ACC     | rs12012022  | . |
| common_variant | AGT     | rs6622126   | . |
| common_variant | CCA     | rs6495341   | . |
| common_variant | AGG     | rs1793141   | . |
| common_variant | ACC     | rs496797    | . |
| common_variant | CTA     | rs1655519   | . |
| common_variant | CAC     | rs570218    | . |
| common_variant | GTG     | rs480963    | . |
| common_variant | GAA     | rs3809869   | . |
| PASS           | GGG     | .           | . |
| common_variant | CGA     | rs181211282 | . |
| PASS           | ACA     | rs34547023  | . |
| common_variant | CCG     | rs11042902  | . |
| PASS           | TATTT   | .           | . |
| PASS           | CCG     | rs12501541  | . |
| common_variant | ACA     | rs11121691  | . |
| common_variant | CAG     | rs2229276   | . |
| common_variant | TGC     | rs3820571   | . |
| common_variant | CAT     | rs3820568   | . |
| common_variant | CGT     | rs2297965   | . |
| PASS           | TTTGTGT | rs34883891  | . |
| common_variant | GTG     | rs111427194 | . |
| common_variant | ATG     | rs1609459   | . |
| common_variant | GGA     | rs10878538  | . |
| PASS           | GGA     | rs3751175   | . |
| common_variant | CTT     | rs7480563   | . |
| PASS           | CGC     | rs12935454  | . |
| common_variant | CAG     | rs1635235   | . |
| common_variant | GGG     | rs4796854   | . |
| common_variant | CAGG    | rs11570050  | . |
| common_variant | GCG     | rs16967494  | . |
| common_variant | TTC     | rs3957557   | . |
| common_variant | GCT     | rs735711    | . |
| PASS           | CCA     | .           | . |
| common_variant | GTT     | rs7159367   | . |
| PASS           | CCG     | rs772285227 | . |
| common_variant | CGG     | rs40305     | . |
| PASS           | GGG     | .           | . |
| PASS           | TTT     | rs2072012   | . |
| PASS           | GCG     | rs72818342  | . |
| PASS           | TTC     | rs10408143  | . |
| PASS           | TAC     | .           | . |
| PASS           | CTG     | rs56397652  | . |
| common_variant | AAG     | rs4950877   | . |
| common_variant | TCC     | rs145701607 | . |
| PASS           | CAA     | rs174536    | . |
| PASS           | TCA     | .           | . |

VEP annotated somatic variants

|                |        |             |   |
|----------------|--------|-------------|---|
| PASS           | TTA    | .           | . |
| common_variant | GCG    | rs2275107   | . |
| PASS           | TCA    | .           | . |
| common_variant | GCC    | rs11670727  | . |
| common_variant | GAA    | rs878907    | . |
| common_variant | AAT    | rs1318102   | . |
| common_variant | CAT    | rs8482      | . |
| common_variant | CCT    | rs35995789  | . |
| common_variant | ATA    | rs11657883  | . |
| common_variant | TGT    | rs11653231  | . |
| common_variant | GCC    | rs2228603   | . |
| common_variant | ACC    | rs73044244  | . |
| PASS           | CGG    | .           | . |
| common_variant | ATA    | rs114443303 | . |
| common_variant | CGA    | rs6087625   | . |
| common_variant | AGG    | rs1079533   | . |
| common_variant | CCC    | rs1136207   | . |
| PASS           | CTT    | .           | . |
| common_variant | CAT    | rs6433569   | . |
| PASS           | ATT    | rs4300824   | . |
| common_variant | GCG    | rs2234570   | . |
| common_variant | ATG    | rs4804      | . |
| common_variant | TCC    | rs2275712   | . |
| common_variant | GAA    | rs201763096 | . |
| common_variant | AGG    | rs4648073   | . |
| PASS           | GCA    | .           | . |
| common_variant | TAT    | rs587555    | . |
| common_variant | GAT    | rs115931931 | . |
| common_variant | GAA    | rs10457670  | . |
| PASS           | GGG    | .           | . |
| PASS           | GTT    | .           | . |
| PASS           | CCA    | .           | . |
| common_variant | GAG    | rs6860507   | . |
| PASS           | ATG    | .           | . |
| PASS           | CCG    | rs456285    | . |
| PASS           | TGC    | rs149560096 | . |
| common_variant | GCT    | rs61755040  | . |
| common_variant | ACG    | rs2233442   | . |
| common_variant | AATTTT | rs376045897 | . |
| PASS           | ATC    | rs17646552  | . |
| common_variant | TGA    | rs61732213  | . |
| common_variant | GGC    | rs74763333  | . |
| common_variant | CGA    | rs117307800 | . |
| common_variant | TAG    | rs11246947  | . |
| PASS           | CGT    | rs10813983  | . |
| common_variant | CGT    | rs1263337   | . |
| common_variant | GCC    | rs11553611  | . |
| PASS           | CCA    | rs905721    | . |
| common_variant | ATC    | rs1799983   | . |
| PASS           | CTC    | .           | . |
| common_variant | CAG    | rs12344155  | . |
| PASS           | GCC    | rs11574894  | . |
| common_variant | TAA    | rs217434    | . |
| common_variant | ATG    | rs3812694   | . |
| common_variant | GCA    | rs727162    | . |

VEP annotated somatic variants

|                |           |             |   |
|----------------|-----------|-------------|---|
| PASS           | CGC       | .           | . |
| PASS           | CCC       | rs7644275   | . |
| PASS           | GAAGAGA   | rs773872527 | . |
| PASS           | TCA       | rs144139217 | . |
| common_variant | ATG       | rs28932181  | . |
| common_variant | ACA       | rs2303707   | . |
| common_variant | GCG       | rs142803792 | . |
| common_variant | GTT       | rs79891871  | . |
| common_variant | CGC       | rs11550029  | . |
| PASS           | AGC       | rs1175392   | . |
| common_variant | CAA       | rs10093400  | . |
| PASS           | GAA       | .           | . |
| common_variant | AGC       | rs11244329  | . |
| common_variant | TAC       | rs10872646  | . |
| PASS           | CCTTAAAGT | rs141363348 | . |
| PASS           | ATTCTAAT  | rs10567712  | . |
| common_variant | GCA       | rs7657846   | . |
| PASS           | ACA       | rs1806222   | . |
| common_variant | CCC       | rs748486    | . |
| common_variant | CTG       | rs1029305   | . |
| PASS           | ATG       | rs2027833   | . |
| PASS           | TAT       | rs2027831   | . |
| PASS           | ATC       | rs2027832   | . |
| common_variant | CTG       | rs2295478   | . |
| PASS           | CAA       | rs2294695   | . |
| common_variant | CGT       | rs115194510 | . |
| common_variant | TGA       | rs11903     | . |
| PASS           | ACG       | rs3826861   | . |
| PASS           | ATC       | rs1025576   | . |
| common_variant | TCG       | rs703903    | . |
| common_variant | TGT       | rs7121804   | . |
| common_variant | AAG       | rs61890335  | . |
| common_variant | TCC       | rs56352135  | . |
| common_variant | TGA       | rs12283334  | . |
| common_variant | AAG       | rs10838637  | . |
| common_variant | ATG       | rs7145814   | . |
| common_variant | GCC       | rs115424559 | . |
| common_variant | TGA       | rs4465383   | . |
| PASS           | AAT       | rs74782118  | . |
| PASS           | GCG       | rs2297594   | . |
| common_variant | CAA       | rs733728    | . |
| common_variant | CAG       | rs173776    | . |
| PASS           | TTAAA     | .           | . |
| common_variant | ACT       | rs57131062  | . |
| common_variant | CTA       | .           | . |
| common_variant | GTT       | rs1152187   | . |
| common_variant | CGA       | rs2070871   | . |
| PASS           | TTC       | .           | . |
| common_variant | GGA       | rs55701638  | . |
| common_variant | AGT       | rs5914274   | . |
| common_variant | CGC       | rs10408458  | . |
| PASS           | ACC       | rs62620049  | . |
| common_variant | GCA       | rs11185826  | . |
| common_variant | CGC       | rs7535528   | . |
| PASS           | TTA       | .           | . |

VEP annotated somatic variants

|                |      |             |   |
|----------------|------|-------------|---|
| common_variant | ACC  | rs11577368  | . |
| common_variant | GCG  | rs11547363  | . |
| common_variant | TCT  | rs41302597  | . |
| PASS           | AAG  | rs13007173  | . |
| common_variant | TAT  | rs6927706   | . |
| common_variant | CAC  | rs3812657   | . |
| PASS           | TCC  | rs766854336 | . |
| PASS           | TCA  | rs12707531  | . |
| common_variant | AGT  | rs4816      | . |
| common_variant | CGT  | rs78561636  | . |
| common_variant | CCG  | rs2241988   | . |
| PASS           | CAC  | rs74436253  | . |
| common_variant | CGA  | rs392565    | . |
| common_variant | TGC  | rs1131978   | . |
| PASS           | CCG  | .           | . |
| common_variant | CTG  | rs246388    | . |
| common_variant | GTT  | rs246391    | . |
| PASS           | TAC  | rs1780192   | . |
| common_variant | GAC  | rs4985155   | . |
| common_variant | TAC  | rs2740      | . |
| common_variant | ACTG | rs34125357  | . |
| common_variant | GCT  | rs1867780   | . |
| PASS           | TTC  | rs6676171   | . |
| common_variant | CGC  | rs12407843  | . |
| common_variant | CTG  | rs6671392   | . |
| common_variant | AGG  | rs17570     | . |
| PASS           | GAA  | rs1061338   | . |
| PASS           | CAG  | rs2306304   | . |
| PASS           | CCA  | rs2306301   | . |
| PASS           | TCC  | .           | . |
| PASS           | GGT  | rs17303413  | . |
| common_variant | CCG  | rs34440547  | . |
| common_variant | CAG  | rs3006473   | . |
| common_variant | GCC  | rs3750354   | . |
| PASS           | TAC  | .           | . |
| PASS           | TGTT | .           | . |
| PASS           | CCT  | .           | . |
| common_variant | CCC  | rs12800061  | . |
| common_variant | TAA  | rs1668      | . |
| PASS           | ATA  | rs7531782   | . |
| common_variant | GAG  | rs17714063  | . |
| common_variant | CAA  | rs72818370  | . |
| common_variant | CAA  | rs4791765   | . |
| PASS           | CCA  | .           | . |
| common_variant | CCG  | rs11541025  | . |
| common_variant | CAT  | rs5751975   | . |
| common_variant | CGC  | rs3761646   | . |
| common_variant | AGG  | rs734823    | . |
| PASS           | CAG  | rs9370067   | . |
| PASS           | ATC  | rs7967264   | . |
| PASS           | CCA  | .           | . |
| common_variant | CCC  | rs2020923   | . |
| PASS           | GTG  | .           | . |
| common_variant | TTA  | rs3740365   | . |
| common_variant | TCT  | rs10786156  | . |

VEP annotated somatic variants

|                |          |             |   |
|----------------|----------|-------------|---|
| common_variant | CAT      | rs3831084   | . |
| common_variant | ACC      | rs3765524   | . |
| PASS           | GAG      | rs4072830   | . |
| common_variant | CAG      | rs12727342  | . |
| PASS           | CTT      | rs10752744  | . |
| common_variant | GTG      | rs55895668  | . |
| common_variant | CAG      | rs6993938   | . |
| common_variant | CGC      | rs1065837   | . |
| common_variant | CGT      | rs11777402  | . |
| common_variant | CAG      | rs7014582   | . |
| common_variant | GAG      | rs7819099   | . |
| PASS           | CCA      | .           | . |
| common_variant | CCT      | rs6573782   | . |
| common_variant | AGA      | rs1555400   | . |
| common_variant | CAA      | rs749271    | . |
| PASS           | GGG      | rs28687780  | . |
| common_variant | TCG      | rs139924905 | . |
| PASS           | TGG      | rs3744078   | . |
| common_variant | GGG      | rs55709850  | . |
| PASS           | AGT      | .           | . |
| common_variant | ACG      | rs12197079  | . |
| common_variant | CTG      | rs2294917   | . |
| common_variant | CGC      | rs8107538   | . |
| common_variant | GACCC    | rs67346689  | . |
| PASS           | TCG      | .           | . |
| PASS           | AAA      | .           | . |
| common_variant | TAT      | rs2424213   | . |
| PASS           | AGT      | rs7986347   | . |
| common_variant | AAG      | rs13273814  | . |
| common_variant | CCC      | rs1801282   | . |
| common_variant | ACG      | rs3856806   | . |
| common_variant | CTG      | rs1669112   | . |
| common_variant | CGG      | rs201186780 | . |
| common_variant | GCC      | rs2301287   | . |
| PASS           | CGG      | rs34856581  | . |
| common_variant | AGG      | rs7894      | . |
| common_variant | GGT      | rs113986045 | . |
| common_variant | ACA      | rs741932    | . |
| common_variant | GGT      | rs2136998   | . |
| PASS           | ATA      | rs11099079  | . |
| common_variant | ATT      | rs496067    | . |
| common_variant | TAT      | rs513572    | . |
| common_variant | ATT      | rs513573    | . |
| common_variant | GAG      | rs880177    | . |
| common_variant | CAG      | rs12544121  | . |
| common_variant | CAC      | rs3741089   | . |
| PASS           | AGA      | .           | . |
| common_variant | AGG      | rs45596236  | . |
| common_variant | GGCTGGTC | rs67531107  | . |
| PASS           | CGG      | rs384726    | . |
| PASS           | CCT      | .           | . |
| common_variant | CGG      | rs141874203 | . |
| common_variant | GGG      | rs3761484   | . |
| PASS           | GGG      | rs9626578   | . |
| PASS           | TTA      | rs150305650 | . |

VEP annotated somatic variants

|                |           |             |   |
|----------------|-----------|-------------|---|
| PASS           | CTAAA     | rs550887876 | . |
| common_variant | TGT       | rs144556615 | . |
| PASS           | GGC       | rs59007873  | . |
| common_variant | CAT       | rs2072284   | . |
| common_variant | TAA       | rs62086002  | . |
| PASS           | AGT       | rs2142111   | . |
| common_variant | CAG       | rs3809916   | . |
| PASS           | TGC       | rs2273786   | . |
| common_variant | CAG       | rs41282874  | . |
| PASS           | ACA       | .           | . |
| common_variant | TTC       | rs3821880   | . |
| PASS           | ATA       | rs4341027   | . |
| common_variant | TGG       | rs17853260  | . |
| PASS           | GCT       | rs12928073  | . |
| common_variant | CAC       | rs116992433 | . |
| PASS           | CTG       | rs117568247 | . |
| common_variant | ATG       | rs138666431 | . |
| common_variant | CTG       | rs201905426 | . |
| PASS           | TTA       | .           | . |
| common_variant | GTT       | rs2058464   | . |
| common_variant | TCT       | rs3744619   | . |
| common_variant | CAC       | rs3751112   | . |
| common_variant | CGG       | rs3812730   | . |
| common_variant | CAC       | rs1626469   | . |
| PASS           | TGA       | rs11871517  | . |
| common_variant | GGC       | rs14193     | . |
| PASS           | GCT       | rs145796187 | . |
| common_variant | ATA       | rs17783124  | . |
| common_variant | GTG       | rs2306919   | . |
| common_variant | TGA       | rs3729931   | . |
| PASS           | TGA       | .           | . |
| common_variant | CCG       | rs1767443   | . |
| common_variant | GGG       | rs10875687  | . |
| common_variant | GAGG      | rs34729771  | . |
| common_variant | ACG       | rs201983107 | . |
| PASS           | GAG       | rs367680909 | . |
| common_variant | CGC       | rs9530901   | . |
| PASS           | TCT       | rs2963925   | . |
| PASS           | CGG       | rs7813046   | . |
| common_variant | CAT       | rs11788747  | . |
| PASS           | TGGCCTTCC | rs150557566 | . |
| PASS           | ATA       | rs6899737   | . |
| common_variant | AGG       | rs5851607   | . |
| common_variant | CAC       | rs465736    | . |
| common_variant | ATG       | rs11242     | . |
| PASS           | GGG       | rs2581786   | . |
| common_variant | GTA       | rs1546650   | . |
| common_variant | CCG       | rs1549168   | . |
| common_variant | TTT       | rs2275742   | . |
| PASS           | CGC       | rs2272805   | . |
| common_variant | GCG       | rs7276592   | . |
| common_variant | TTA       | rs3840984   | . |
| common_variant | GCC       | rs76239019  | . |
| PASS           | AAC       | rs55668927  | . |
| PASS           | GGA       | .           | . |



VEP annotated somatic variants

|                |      |             |   |
|----------------|------|-------------|---|
| PASS           | CCT  | rs12944458  | . |
| common_variant | AGAA | rs33952548  | . |
| PASS           | AGT  | rs144040326 | . |
| PASS           | AGG  | .           | . |
| PASS           | ATA  | rs9864412   | . |
| common_variant | CGT  | rs967454    | . |
| common_variant | AGT  | rs2230774   | . |
| PASS           | GGC  | rs11208364  | . |
| common_variant | TCC  | rs1535330   | . |
| common_variant | ACC  | rs193084032 | . |
| PASS           | AAC  | rs2224797   | . |
| PASS           | CGT  | rs7900838   | . |
| common_variant | GAT  | rs7968684   | . |
| PASS           | CGG  | rs486089    | . |
| common_variant | ACG  | rs7136561   | . |
| common_variant | CCG  | rs12947988  | . |
| common_variant | GGA  | rs73020697  | . |
| PASS           | TTT  | .           | . |
| PASS           | TTT  | .           | . |
| common_variant | ACG  | rs6509      | . |
| common_variant | CCA  | rs7580      | . |
| PASS           | CAC  | rs6932660   | . |
| common_variant | GCC  | rs7217786   | . |
| common_variant | CCG  | rs2271603   | . |
| common_variant | CGG  | rs2838344   | . |
| common_variant | CGA  | rs2155722   | . |
| common_variant | TAG  | rs7210579   | . |
| common_variant | AAT  | rs3765595   | . |
| common_variant | GTT  | rs542998    | . |
| common_variant | TCA  | rs12658664  | . |
| common_variant | CGG  | rs11541392  | . |
| PASS           | CTT  | rs7098448   | . |
| common_variant | CGG  | rs1805343   | . |
| common_variant | TCG  | rs11083462  | . |
| common_variant | GGG  | rs3745843   | . |
| common_variant | ACG  | rs75181912  | . |
| PASS           | CGG  | rs777579024 | . |
| common_variant | TTA  | rs10754602  | . |
| PASS           | GAT  | rs791541    | . |
| PASS           | CGT  | rs41279198  | . |
| PASS           | ACT  | rs11147974  | . |
| PASS           | GGG  | .           | . |
| PASS           | TAC  | rs11763269  | . |
| common_variant | CAG  | rs1053744   | . |
| common_variant | AGT  | rs11042500  | . |
| PASS           | CGG  | .           | . |
| common_variant | CCC  | rs1142287   | . |
| PASS           | TCC  | rs882745    | . |
| PASS           | ATC  | .           | . |
| common_variant | CAC  | rs2240572   | . |
| PASS           | TGA  | rs35006492  | . |
| common_variant | CGG  | rs167618    | . |
| common_variant | AAG  | rs1546961   | . |
| PASS           | CCC  | rs3731760   | . |
| common_variant | CAT  | rs6746030   | . |

VEP annotated somatic variants

|                |        |             |   |
|----------------|--------|-------------|---|
| common_variant | AAA    | rs10180721  | . |
| PASS           | CCC    | rs73100512  | . |
| PASS           | GGC    | rs3801066   | . |
| common_variant | CCC    | rs530168313 | . |
| common_variant | CGG    | rs9608973   | . |
| common_variant | AGC    | rs6695715   | . |
| common_variant | ACT    | rs2273526   | . |
| common_variant | CGG    | rs2303513   | . |
| PASS           | AAGACT | rs3830973   | . |
| PASS           | TAA    | rs3750630   | . |
| common_variant | AAC    | rs3763695   | . |
| common_variant | CCC    | rs9420792   | . |
| PASS           | GCT    | rs117852708 | . |
| common_variant | TAT    | rs61738919  | . |
| common_variant | CAA    | rs5362      | . |
| PASS           | CGA    | rs17522707  | . |
| common_variant | ATA    | rs1990044   | . |
| common_variant | GCA    | rs17241389  | . |
| PASS           | TCT    | rs6446202   | . |
| PASS           | TGA    | rs1062753   | . |
| PASS           | AGG    | rs9323910   | . |
| PASS           | GGA    | rs268686    | . |
| PASS           | TGT    | .           | . |
| PASS           | GGT    | .           | . |
| PASS           | GTA    | .           | . |
| common_variant | GAG    | rs35377445  | . |
| PASS           | AGG    | rs7197262   | . |
| common_variant | CGC    | rs147508693 | . |
| common_variant | TATTT  | rs3998628   | . |
| common_variant | CTG    | rs2429908   | . |
| PASS           | GGT    | rs2447099   | . |
| common_variant | CGC    | rs143734853 | . |
| common_variant | CTT    | rs7805      | . |
| common_variant | ATG    | rs3740471   | . |
| PASS           | ACG    | rs187882127 | . |
| common_variant | GCG    | rs41275786  | . |
| common_variant | ACC    | rs1233555   | . |
| PASS           | GGC    | .           | . |
| PASS           | CCG    | rs3810108   | . |
| PASS           | TGG    | .           | . |
| common_variant | GGT    | rs9982519   | . |
| PASS           | ATA    | rs12145798  | . |
| common_variant | GCC    | rs11581248  | . |
| PASS           | CGG    | rs779111224 | . |
| common_variant | ATG    | rs13106574  | . |
| PASS           | GCC    | .           | . |
| common_variant | AAA    | rs11976455  | . |
| common_variant | GTC    | rs6647476   | . |
| common_variant | GGG    | rs2269914   | . |
| common_variant | AGG    | rs11668879  | . |
| common_variant | TTG    | rs2631365   | . |
| PASS           | TGG    | .           | . |
| common_variant | ATG    | rs941650    | . |
| PASS           | AAT    | .           | . |
| common_variant | CCG    | rs12942600  | . |

VEP annotated somatic variants

|                |              |             |   |
|----------------|--------------|-------------|---|
| PASS           | ACG          | rs112153156 | . |
| PASS           | CCG          | rs145107782 | . |
| PASS           | GTC          | rs4980349   | . |
| PASS           | AACC         | .           | . |
| PASS           | TCC          | rs41302651  | . |
| common_variant | CGT          | rs34664116  | . |
| common_variant | AGC          | rs205966    | . |
| PASS           | AGG          | rs35870005  | . |
| PASS           | TAT          | rs948270    | . |
| common_variant | CAG          | rs78020607  | . |
| PASS           | AGG          | .           | . |
| common_variant | CGA          | rs2288998   | . |
| PASS           | AGC          | rs12703112  | . |
| common_variant | TAG          | rs4808709   | . |
| PASS           | CAC          | rs10521578  | . |
| common_variant | GGT          | rs2278405   | . |
| PASS           | AGA          | rs6354      | . |
| common_variant | CGG          | rs2248253   | . |
| common_variant | TCA          | rs1569951   | . |
| common_variant | CGC          | rs17183863  | . |
| common_variant | CCG          | rs1056846   | . |
| PASS           | AACGAAGAGTGC | .           | . |
| PASS           | TTT          | .           | . |
| PASS           | ACTTT        | .           | . |
| PASS           | ACA          | rs11090629  | . |
| common_variant | AGT          | rs3742909   | . |
| PASS           | CGT          | rs917208    | . |
| common_variant | ACT          | rs12065652  | . |
| PASS           | GCA          | .           | . |
| common_variant | CGC          | rs1544402   | . |
| common_variant | CAT          | rs10754367  | . |
| common_variant | TGG          | rs12142616  | . |
| common_variant | CGG          | rs5908761   | . |
| PASS           | GGA          | .           | . |
| PASS           | TAG          | rs875097    | . |
| PASS           | GAG          | .           | . |
| common_variant | GGT          | rs11548457  | . |
| common_variant | CCG          | rs2306324   | . |
| PASS           | GGA          | .           | . |
| PASS           | GCA          | rs58090119  | . |
| common_variant | TCC          | rs117804715 | . |
| common_variant | AGG          | rs12536873  | . |
| common_variant | CCA          | rs55776327  | . |
| common_variant | CTT          | rs1008335   | . |
| PASS           | CTGG         | .           | . |
| common_variant | CCG          | rs139731922 | . |
| PASS           | AGT          | .           | . |
| common_variant | TAA          | .           | . |
| PASS           | AGCA         | .           | . |
| common_variant | ATA          | rs697210    | . |
| PASS           | AACC         | .           | . |
| common_variant | ACG          | rs11556615  | . |
| PASS           | TGG          | .           | . |
| PASS           | CAT          | rs557622174 | . |
| PASS           | TGCC         | .           | . |

VEP annotated somatic variants

|                |             |             |   |
|----------------|-------------|-------------|---|
| common_variant | CAA         | rs3780015   | . |
| common_variant | CTG         | rs10851866  | . |
| common_variant | GCG         | rs3934983   | . |
| PASS           | GCC         | rs58802664  | . |
| PASS           | ACATATA     | rs746073071 | . |
| common_variant | TTT         | rs1834      | . |
| PASS           | CAA         | rs34275118  | . |
| PASS           | CGT         | rs41285881  | . |
| common_variant | CTG         | rs3759259   | . |
| PASS           | CCG         | .           | . |
| PASS           | CCA         | .           | . |
| common_variant | AGG         | rs13050872  | . |
| common_variant | AGT         | rs237025    | . |
| PASS           | TGG         | rs4803244   | . |
| common_variant | GCG         | rs1529733   | . |
| common_variant | AAG         | rs4341217   | . |
| PASS           | TAT         | rs1390679   | . |
| common_variant | GGG         | rs1132645   | . |
| PASS           | CAC         | .           | . |
| common_variant | TGC         | rs33976862  | . |
| common_variant | ATA         | rs74413846  | . |
| common_variant | ACG         | rs1744177   | . |
| common_variant | CCG         | rs3743244   | . |
| common_variant | GGC         | rs12645298  | . |
| common_variant | TGG         | rs3734296   | . |
| PASS           | TCT         | rs237028    | . |
| common_variant | GGG         | rs17680881  | . |
| PASS           | ATG         | rs3788764   | . |
| PASS           | CCG         | rs2073138   | . |
| common_variant | GGG         | rs35105682  | . |
| common_variant | ACA         | rs572705    | . |
| common_variant | TTA         | rs606511    | . |
| common_variant | GGT         | rs394558    | . |
| PASS           | GAT         | rs3217211   | . |
| common_variant | ACG         | rs146025212 | . |
| common_variant | CCT         | rs9573565   | . |
| common_variant | ATG         | rs1138454   | . |
| PASS           | ACC         | .           | . |
| common_variant | AGA         | rs59223436  | . |
| common_variant | GGA         | rs5944856   | . |
| PASS           | TTA         | .           | . |
| PASS           | CCT         | rs10044956  | . |
| PASS           | TCG         | rs12169610  | . |
| common_variant | TCT         | rs11851097  | . |
| PASS           | TTAAACAAACA | rs530289129 | . |
| PASS           | CCA         | .           | . |
| common_variant | CAC         | rs251796    | . |
| PASS           | GTT         | .           | . |
| PASS           | GGT         | rs302858    | . |
| common_variant | CTG         | rs118141221 | . |
| common_variant | AGG         | rs12857479  | . |
| common_variant | TCG         | rs324356    | . |
| common_variant | GCT         | rs199687528 | . |
| common_variant | CGG         | rs12609379  | . |
| PASS           | AAA         | rs11165376  | . |

VEP annotated somatic variants

|                |                   |             |   |
|----------------|-------------------|-------------|---|
| common_variant | TGT               | rs2290380   | . |
| common_variant | CAC               | rs513970    | . |
| common_variant | AGA               | rs6605530   | . |
| PASS           | GGCC              | rs3214576   | . |
| common_variant | CTG               | rs2074603   | . |
| PASS           | CTC               | .           | . |
| PASS           | CTGG              | .           | . |
| PASS           | ATA               | .           | . |
| common_variant | AGT               | rs41284222  | . |
| common_variant | CGT               | rs2292151   | . |
| PASS           | TGG               | .           | . |
| common_variant | CTG               | rs200152166 | . |
| PASS           | ACG               | rs2279322   | . |
| PASS           | CGC               | .           | . |
| common_variant | GCG               | rs2228178   | . |
| PASS           | CTG               | rs8036209   | . |
| PASS           | TTA               | .           | . |
| common_variant | AAC               | rs2291822   | . |
| PASS           | CGT               | rs77173980  | . |
| PASS           | CCC               | rs12252784  | . |
| common_variant | GGG               | rs61741039  | . |
| common_variant | CCTT              | rs144703742 | . |
| PASS           | CGG               | .           | . |
| common_variant | AAG               | rs76116020  | . |
| PASS           | CGG               | rs895438    | . |
| common_variant | CGG               | rs3800592   | . |
| common_variant | TTC               | rs2276884   | . |
| common_variant | AGT               | rs5936308   | . |
| PASS           | CCTAGGTTGACTATCAT | .           | . |
| common_variant | AAT               | rs147529920 | . |
| common_variant | TCG               | rs12646286  | . |
| common_variant | TAT               | rs661561    | . |
| common_variant | CCC               | rs3181195   | . |
| common_variant | CCG               | rs12531309  | . |
| common_variant | CGT               | rs34377860  | . |
| common_variant | ACT               | rs2290207   | . |
| common_variant | TGT               | rs560191    | . |
| common_variant | TTA               | rs2602141   | . |
| common_variant | AAT               | rs16957730  | . |
| common_variant | CCT               | rs1045781   | . |
| PASS           | GCA               | .           | . |
| PASS           | CAG               | rs1697964   | . |
| common_variant | CTG               | rs1697963   | . |
| PASS           | TTA               | .           | . |
| PASS           | CCG               | rs10410833  | . |
| PASS           | ACA               | rs9322994   | . |
| common_variant | ATG               | rs12147991  | . |
| common_variant | CAG               | rs2295275   | . |
| PASS           | ATG               | rs3020967   | . |
| PASS           | TCT               | rs1029237   | . |
| common_variant | CGT               | rs2269553   | . |
| PASS           | TGG               | rs4971059   | . |
| common_variant | GCG               | rs35622844  | . |
| common_variant | CAT               | rs114415891 | . |
| common_variant | CAT               | rs2297889   | . |

VEP annotated somatic variants

|                |     |             |   |
|----------------|-----|-------------|---|
| PASS           | GCC | rs11268748  | . |
| common_variant | ATG | rs30774     | . |
| PASS           | CCC | rs200889110 | . |
| common_variant | CTG | rs148858467 | . |
| common_variant | ATA | rs7885599   | . |
| PASS           | ACC | rs1885117   | . |
| PASS           | GTC | rs12906081  | . |
| common_variant | ACC | rs34350821  | . |
| common_variant | AAT | rs2063010   | . |
| PASS           | TGG | .           | . |
| common_variant | CAT | rs1073123   | . |
| common_variant | CGG | rs10901220  | . |
| PASS           | GCA | .           | . |
| PASS           | CAT | rs12030928  | . |
| common_variant | GCA | rs1802288   | . |
| PASS           | TAT | rs4826996   | . |
| common_variant | GGG | rs1052773   | . |
| common_variant | ATG | rs12664472  | . |
| common_variant | GGC | rs3800294   | . |
| PASS           | TGT | .           | . |
| PASS           | AGT | rs35168566  | . |
| common_variant | TCA | rs182730993 | . |
| common_variant | CGC | rs2001324   | . |
| common_variant | CTC | rs7898115   | . |
| PASS           | GTG | rs12254171  | . |
| common_variant | CAC | rs7075277   | . |
| common_variant | ATC | rs3750580   | . |
| common_variant | CCT | rs1132079   | . |
| common_variant | GAA | rs17634167  | . |
| PASS           | GAT | rs12796222  | . |
| PASS           | AAA | rs1046860   | . |
| PASS           | ACG | rs56058201  | . |
| common_variant | GAA | rs705956    | . |
| PASS           | CTC | rs827958    | . |
| PASS           | TCC | .           | . |
| PASS           | GGA | rs753582974 | . |
| PASS           | TAC | rs2839509   | . |
| PASS           | GCC | rs12575062  | . |
| common_variant | ATC | rs2301914   | . |
| PASS           | CGT | rs781247113 | . |
| common_variant | TGC | rs16923472  | . |
| common_variant | GGT | rs2734828   | . |
| common_variant | TCG | rs2247238   | . |
| PASS           | GGC | rs7852539   | . |
| common_variant | CTA | rs1716698   | . |
| PASS           | TCG | rs220147    | . |
| common_variant | CGA | rs220159    | . |
| common_variant | TCG | rs220150    | . |
| PASS           | ATA | .           | . |
| common_variant | CCC | rs373842487 | . |
| PASS           | GGG | rs72836153  | . |
| common_variant | TGG | rs62231899  | . |
| PASS           | TCC | .           | . |
| common_variant | ACG | rs41277210  | . |
| common_variant | CTG | rs4430871   | . |

VEP annotated somatic variants

|                |                  |             |   |
|----------------|------------------|-------------|---|
| PASS           | CTT              | .           | . |
| PASS           | TGC              | .           | . |
| PASS           | AAG              | rs9605536   | . |
| PASS           | CAG              | rs41279154  | . |
| PASS           | GGG              | rs3214918   | . |
| PASS           | TAC              | .           | . |
| common_variant | CCT              | rs1220622   | . |
| PASS           | TTC              | rs17031260  | . |
| PASS           | TCT              | rs55721648  | . |
| PASS           | AAA              | .           | . |
| PASS           | TGG              | .           | . |
| PASS           | CCC              | rs939592692 | . |
| common_variant | CCT              | rs79238281  | . |
| common_variant | CCA              | rs15493     | . |
| PASS           | GGCC             | .           | . |
| common_variant | CAT              | rs11769825  | . |
| common_variant | CTC              | rs13246460  | . |
| PASS           | CAT              | rs10857625  | . |
| PASS           | GCG              | rs7079527   | . |
| common_variant | CGG              | rs10886789  | . |
| common_variant | ACT              | rs2289336   | . |
| common_variant | TGC              | rs1652727   | . |
| common_variant | TCG              | rs1866516   | . |
| common_variant | TTT              | rs4538426   | . |
| common_variant | GGA              | rs41307688  | . |
| common_variant | GCT              | rs181113399 | . |
| PASS           | CGG              | rs147562907 | . |
| PASS           | GTC              | rs2527189   | . |
| common_variant | CTCCTCCTCCTCCCTT | rs763153590 | . |
| PASS           | AGG              | rs2278128   | . |
| PASS           | AGA              | rs4720537   | . |
| common_variant | TGC              | rs11554421  | . |
| common_variant | AAA              | rs910697    | . |
| common_variant | TGT              | rs3793771   | . |
| common_variant | CAT              | rs3734500   | . |
| common_variant | ACG              | rs11068780  | . |
| PASS           | GGG              | rs3733979   | . |
| common_variant | GCT              | rs2270844   | . |
| PASS           | AAC              | rs4134861   | . |
| common_variant | CGG              | rs114552728 | . |
| PASS           | AGG              | rs2273739   | . |
| common_variant | CGG              | rs148023469 | . |
| common_variant | CAC              | rs1106841   | . |
| common_variant | CTG              | rs915927    | . |
| PASS           | ACG              | rs25486     | . |
| PASS           | AGG              | .           | . |
| common_variant | GAA              | rs3738590   | . |
| common_variant | TTT              | rs2666826   | . |
| common_variant | CCT              | rs11155787  | . |
| common_variant | ATC              | rs9484827   | . |
| common_variant | ACA              | rs1001242   | . |
| common_variant | GAC              | rs415434    | . |
| common_variant | CGG              | rs556775    | . |
| common_variant | CCG              | rs11774714  | . |
| PASS           | TCT              | rs574606000 | . |

VEP annotated somatic variants

|                |     |             |   |
|----------------|-----|-------------|---|
| common_variant | CCA | rs139527148 | . |
| PASS           | AAC | rs537807113 | . |
| common_variant | AGG | rs2306159   | . |
| PASS           | CCG | rs931713    | . |
| common_variant | CTT | rs7781581   | . |
| common_variant | AAC | rs4982766   | . |
| PASS           | AAT | rs4734883   | . |
| PASS           | CAG | rs7915      | . |
| PASS           | AGC | .           | . |
| common_variant | AAT | rs1989839   | . |
| common_variant | CGC | rs2301639   | . |
| PASS           | TGG | rs2071258   | . |
| common_variant | GCG | rs7066295   | . |
| common_variant | CTG | rs862708    | . |
| common_variant | CCT | rs28444973  | . |
| PASS           | GGA | rs10822043  | . |
| common_variant | CAG | rs2910443   | . |
| PASS           | TGT | .           | . |
| common_variant | CTG | rs11666149  | . |
| PASS           | GTC | rs384148    | . |
| PASS           | AAA | rs4829778   | . |
| common_variant | ATG | rs1055753   | . |
| common_variant | CTA | rs7273242   | . |
| common_variant | AGC | rs8182086   | . |
| common_variant | GGA | rs11556528  | . |
| common_variant | TGT | rs9636139   | . |
| PASS           | AGA | rs3217340   | . |
| common_variant | TCC | rs8104929   | . |
| common_variant | CGG | rs12067843  | . |
| common_variant | TTA | rs1781873   | . |
| common_variant | CCT | rs11710621  | . |
| common_variant | ACG | rs1129093   | . |
| common_variant | GAC | rs35215913  | . |
| common_variant | TCT | rs8110062   | . |
| common_variant | TCG | rs12590618  | . |
| common_variant | ACC | rs489172    | . |
| PASS           | GTC | .           | . |
| common_variant | TGT | rs10403445  | . |
| common_variant | ACT | rs781839    | . |



VEP annotated somatic variants

| ExAC_AF_Adj | ExAC_AC_AN_Adj | ExAC_AC_AN   | ExAC_AC_AN_AFR |
|-------------|----------------|--------------|----------------|
| 0.03174     | 3339/105188    | 3344/106210  | 50/9062        |
| 0.59        | 62613/106132   | 62619/106210 | 2897/9040      |
| 0.5578      | 50589/90694    | 56800/105742 | 2014/7116      |
| 0.6583      | 69519/105606   | 69713/106192 | 6668/9018      |
| 0.00002841  | 3/105586       | 3/105950     | 0/8478         |
| 0.2953      | 31211/105680   | 31254/106208 | 6444/9040      |
| 0.04284     | 299/6980       | 3248/77598   | 138/490        |
| 0.1961      | 20692/105522   | 20728/106200 | 1020/8948      |
| 0.8446      | 88054/104256   | 89278/105826 | 7524/8190      |
| 0.05888     | 1642/27886     | 2718/101626  | 18/1492        |
| 0           | 0/16528        | 1/98338      | 0/2218         |
| 0.04864     | 5055/103934    | 5060/106208  | 219/8630       |
| 0.6234      | 66165/106132   | 66176/106210 | 3985/9062      |
| 0.3329      | 34168/102638   | 34814/106182 | 2157/8880      |
| 0.1626      | 17030/104766   | 17089/106206 | 1800/8868      |
| 0.3122      | 16138/51688    | 21686/105112 | 290/4130       |
| 0.4952      | 51355/103714   | 52227/106198 | 3702/8800      |
| 0.000862    | 16/18562       | 33/93574     | 0/2336         |
| 0.6552      | 65788/100406   | 69137/106004 | 5393/8962      |
| 0.0291      | 2985/102584    | 3012/106146  | 1085/8866      |
| 0.2249      | 15921/70790    | 18666/105412 | 1432/5648      |
| 0.07192     | 772/10734      | 800/18980    | 3/248          |
| 0.2403      | 25294/105276   | 25312/106210 | 5901/9056      |
| 0.5914      | 62641/105912   | 62714/106210 | 5037/9064      |
| 0.03341     | 2529/75705     | 3614/106186  | 39/7432        |
| 0.4287      | 6683/15588     | 7053/17768   | 531/1308       |
| 0.4874      | 51507/105682   | 51594/106184 | 1750/8682      |
| 0.205       | 21746/106078   | 21762/106210 | 2297/9052      |
| 0.3108      | 24303/78184    | 26786/106100 | 1284/6162      |
| 0.014       | 1485/106072    | 1485/106210  | 27/9024        |
| 0.2046      | 21706/106108   | 21707/106206 | 398/9000       |
| 0.4068      | 36923/90774    | 39355/106038 | 3826/7728      |
| 0.76        | 79373/104444   | 80531/106162 | 7328/8984      |

VEP annotated somatic variants

|            |              |              |           |
|------------|--------------|--------------|-----------|
| 0.2512     | 24777/98622  | 25581/106084 | 1949/8884 |
| 0.1905     | 19953/104764 | 20078/106192 | 367/8948  |
| 0.07686    | 8154/106094  | 8155/106210  | 502/9056  |
| 0.7744     | 82229/106190 | 82233/106210 | 8197/9066 |
| 0.3545     | 5064/14286   | 13462/100598 | 143/1298  |
| 0.2585     | 27200/105206 | 27350/106210 | 983/8992  |
| 0.2325     | 20973/90214  | 21904/105960 | 3827/7940 |
| 0.2084     | 20079/96346  | 21085/105646 | 2458/8182 |
| 0.2122     | 21458/101130 | 21678/103932 | 1199/7368 |
| 0.8428     | 86925/103136 | 88442/105530 | 7202/8388 |
| 0.2221     | 7272/32738   | 13991/101298 | 1291/4002 |
| 0.09028    | 9517/105414  | 9544/106208  | 158/8720  |
| 0.04679    | 4913/105004  | 4923/105730  | 70/8408   |
| 0.00001897 | 2/105444     | 2/106208     | 0/8682    |
| 0.2713     | 27361/100848 | 28168/104070 | 1754/8196 |
| 0.2818     | 27864/98882  | 28742/103936 | 2136/8076 |
| 0.03902    | 4117/105506  | 4117/106168  | 51/8604   |
| 0.059      | 6265/106190  | 6265/106210  | 102/9066  |
| 0.2969     | 31127/104838 | 31292/106208 | 3762/9044 |
| 0.1866     | 13882/74398  | 19195/106204 | 2624/7418 |
| 0.07413    | 3001/40481   | 5206/105250  | 74/4055   |
| 0.3431     | 36415/106132 | 36419/106210 | 4787/9066 |
| 0.2194     | 23289/106166 | 23293/106210 | 413/9066  |
| 0.05043    | 5350/106098  | 5354/106210  | 120/9056  |
| 0.6481     | 6084/9387    | 9772/15816   | 413/483   |
| 0.6328     | 5915/9347    | 9665/15866   | 268/345   |
| 0.5233     | 3653/6981    | 6228/12594   | 54/189    |
| 0.1714     | 17534/102292 | 17654/106204 | 716/9020  |
| 0.206      | 13690/66470  | 15028/105952 | 1465/5452 |
| 0.05208    | 5448/104600  | 5474/106194  | 120/8548  |
| 0.2647     | 23036/87034  | 25175/105904 | 2068/6706 |
| 0.0458     | 4722/103104  | 4796/106196  | 210/8698  |

VEP annotated somatic variants

|          |              |              |           |
|----------|--------------|--------------|-----------|
| 0.511    | 19822/38790  | 43159/98228  | 1006/2688 |
| 0.384    | 37792/98420  | 39486/106038 | 1859/8658 |
| 0.6721   | 53970/80300  | 68601/105108 | 5675/7226 |
| 0.1784   | 15999/89694  | 17825/106002 | 2231/7478 |
| 0.03367  | 3566/105922  | 3571/106208  | 230/9002  |
| 0.02772  | 2646/95450   | 2691/106172  | 575/7942  |
| 0.1074   | 11408/106180 | 11410/106210 | 185/9066  |
| 0.3558   | 37774/106176 | 37777/106210 | 2383/9066 |
| 0.0811   | 8562/105576  | 8565/105678  | 1352/8468 |
| 0.2562   | 19449/75904  | 27518/106204 | 2622/7390 |
| 0.2649   | 26813/101226 | 27572/106180 | 1709/8866 |
| 0.4044   | 42860/105982 | 42915/106208 | 4269/9030 |
| 0.27     | 28551/105736 | 28673/106206 | 1963/9060 |
| 0.9431   | 57024/60464  | 98479/105300 | 6495/6708 |
| 0.4172   | 31240/74889  | 44028/106208 | 1322/7407 |
| 0.2833   | 29841/105338 | 29904/106194 | 2646/8794 |
| 0.3612   | 36376/100718 | 37501/106074 | 5276/8576 |
| 0.7639   | 81064/106122 | 81078/106210 | 8005/9060 |
| 0.4177   | 44292/106042 | 44328/106210 | 5170/9048 |
| 0.1157   | 12020/103854 | 12121/106208 | 326/8704  |
| 0.1814   | 12765/70357  | 17864/105844 | 1681/7332 |
| 0.0879   | 1649/18759   | 4874/101716  | 30/2233   |
| 0.005075 | 498/98130    | 509/106192   | 13/8346   |
| 0.1121   | 10487/93526  | 11378/106130 | 276/7910  |
| 0.2677   | 28319/105780 | 28365/106210 | 2733/9032 |
| 0.03945  | 160/4056     | 275/18182    | 56/1300   |
| 0.2879   | 296/1028     | 3116/60188   | 131/442   |
| 0.1095   | 11582/105748 | 11601/106210 | 209/9028  |
| 0.7193   | 43145/59980  | 67884/100490 | 2155/3750 |
| 0.2823   | 28745/101824 | 29556/105952 | 2486/8078 |

VEP annotated somatic variants

|          |              |              |           |
|----------|--------------|--------------|-----------|
| 0.3291   | 5669/17228   | 7162/28820   | 268/1520  |
| 0.04319  | 4586/106176  | 4586/106210  | 76/9064   |
| 0.4415   | 5633/12758   | 6220/15516   | 157/370   |
| 0.1583   | 16717/105582 | 16764/106208 | 2387/8972 |
| 0.3927   | 41626/105986 | 41671/106210 | 6303/9064 |
| 0.5583   | 55089/98672  | 57055/104774 | 4496/7484 |
| 0.2973   | 31237/105070 | 31416/106202 | 1707/8914 |
| 0.1977   | 14912/75422  | 21517/106194 | 250/7302  |
| 0.1701   | 18057/106164 | 18061/106208 | 3585/9066 |
| 0.1652   | 16912/102392 | 17056/106200 | 611/8900  |
| 0.2736   | 25293/92440  | 25841/98930  | 2508/7844 |
| 0.6692   | 63706/95194  | 70007/106142 | 5559/7882 |
| 0.07791  | 7664/98370   | 7858/106196  | 262/8228  |
| 0.2135   | 22662/106156 | 22673/106210 | 5367/9048 |
| 0.3321   | 3684/11094   | 4571/16372   | 183/250   |
| 0.2697   | 27582/102288 | 27920/106162 | 1814/8876 |
| 0.01979  | 551/27846    | 1090/104406  | 14/2782   |
| 0.002675 | 284/106168   | 284/106210   | 7/9064    |
| 0.268    | 28282/105538 | 28352/105758 | 4841/8468 |
| 0.09617  | 10161/105660 | 10167/106210 | 219/8836  |
| 0.01148  | 133/11582    | 441/93610    | 1/1060    |
| 0.1903   | 19272/101248 | 19654/106124 | 3786/8756 |
| 0.1011   | 10308/102006 | 10334/105828 | 712/8426  |
| 0.008588 | 840/97814    | 849/106096   | 3/7886    |
| 0.257    | 23200/90256  | 25230/101712 | 1158/5428 |
| 0.3312   | 34776/105010 | 35036/106190 | 1708/8638 |
| 0.08369  | 8695/103890  | 8715/106206  | 191/8396  |
| 0.01269  | 1319/103910  | 1321/106210  | 29/8858   |
| 0.4173   | 42801/102564 | 43767/106154 | 2787/8920 |
| 0.3156   | 33223/105268 | 33417/106206 | 960/8922  |

VEP annotated somatic variants

|            |              |              |           |
|------------|--------------|--------------|-----------|
| 0.2933     | 30953/105518 | 30963/105638 | 3113/8462 |
| 0.001677   | 176/104924   | 176/105648   | 5/8448    |
| 0.001466   | 155/105744   | 155/106192   | 7/9014    |
| 0.1427     | 11345/79530  | 12711/103880 | 1421/5924 |
| 0.1756     | 18507/105374 | 18529/105934 | 735/8416  |
| 0.1506     | 15685/104132 | 15771/106206 | 864/8826  |
| 0.1262     | 7964/63118   | 9431/104558  | 165/5046  |
| 0.3653     | 38722/106008 | 38742/106210 | 4250/9034 |
| 0.2626     | 27773/105752 | 27801/106208 | 1082/8736 |
| 0.5873     | 62095/105730 | 62251/106210 | 3321/9044 |
| 0.2139     | 22590/105596 | 22641/106196 | 2609/8992 |
| 0.0317     | 706/22268    | 1267/104326  | 16/2184   |
| 0.3823     | 40577/106146 | 40587/106210 | 726/9062  |
| 0.7104     | 75408/106152 | 75422/106210 | 5113/9048 |
| 0.00008333 | 8/96004      | 10/106136    | 0/8374    |
| 0.0183     | 1896/103584  | 1901/106204  | 47/9016   |
| 0.1871     | 19866/106162 | 19872/106210 | 2000/9054 |
| 0.03925    | 504/12842    | 749/37404    | 368/1202  |
| 0.09669    | 1187/12276   | 3134/47582   | 154/990   |
| 0.4009     | 15300/38166  | 30995/101492 | 2196/3848 |
| 0.165      | 17344/105140 | 17367/105772 | 1099/8474 |
| 0.2876     | 2832/9846    | 10151/60990  | 44/216    |
| 0.3606     | 13966/38725  | 26749/104298 | 1617/5638 |
| 0.06685    | 7099/106200  | 7099/106210  | 258/9066  |
| 0.7038     | 74346/105632 | 74675/106210 | 5364/9022 |
| 0.6318     | 67077/106160 | 67100/106198 | 5385/9062 |
| 0.676      | 71077/105142 | 71586/106088 | 5701/9014 |
| 0.2252     | 23851/105900 | 23877/106202 | 2194/9056 |
| 0.1631     | 17127/104994 | 17522/106200 | 552/9050  |
| 0.5544     | 11570/20868  | 42206/79376  | 827/1870  |

VEP annotated somatic variants

|          |              |              |           |
|----------|--------------|--------------|-----------|
| 0.1048   | 11125/106142 | 11127/106210 | 325/9052  |
| 0.1044   | 10330/98968  | 10688/106124 | 2448/8794 |
| 0.4955   | 47585/96026  | 50662/106168 | 3338/8206 |
| 0.303    | 30366/100204 | 30798/106208 | 947/8198  |
| 0.8494   | 51773/60953  | 87883/105662 | 6306/6433 |
| 0.03137  | 3325/106002  | 3325/106210  | 56/9056   |
| 0.1836   | 16185/88140  | 16213/106048 | 3603/8420 |
| 0.2868   | 21733/75771  | 29835/106202 | 4086/7404 |
| 0.1421   | 14196/99880  | 14778/106170 | 288/8484  |
| 0.8907   | 94380/105966 | 94573/106206 | 7455/9060 |
| 0.3731   | 39615/106166 | 39621/106210 | 5515/9064 |
| 0.2107   | 22373/106194 | 22373/106210 | 540/9066  |
| 0.3714   | 39219/105592 | 39272/106206 | 3722/8994 |
| 0.2158   | 22825/105754 | 22867/106206 | 1294/9010 |
| 0.008719 | 908/104142   | 912/106188   | 34/8488   |
| 0.4836   | 50828/105110 | 51172/106210 | 5132/8992 |
| 0.2415   | 21330/88310  | 23035/105194 | 732/6460  |
| 0.3754   | 39261/104596 | 39449/105668 | 2995/8334 |
| 0.3164   | 22421/70866  | 32755/105926 | 1761/7278 |
| 0.5386   | 57103/106028 | 57164/106206 | 3418/9036 |
| 0.3338   | 35211/105482 | 35434/106204 | 1793/8952 |
| 0.168    | 17685/105272 | 17738/106206 | 3717/8942 |
| 0.06257  | 6627/105908  | 6630/106204  | 793/9030  |
| 0.3603   | 3172/8804    | 4166/16128   | 23/210    |
| 0.007691 | 814/105836   | 819/106210   | 10/9064   |
| 0.1256   | 13330/106116 | 13335/106210 | 1878/9066 |
| 0.00723  | 767/106080   | 767/106210   | 15/9060   |
| 0.5749   | 1719/2990    | 4812/12274   | 20/44     |
| 0.5682   | 42760/75254  | 60843/106202 | 2694/7348 |

VEP annotated somatic variants

|             |              |              |           |
|-------------|--------------|--------------|-----------|
| 0.4864      | 46217/95016  | 50377/105872 | 2280/7314 |
| 0.4245      | 41186/97014  | 44249/105498 | 1238/8116 |
| 0.2133      | 2039/9558    | 2483/16326   | 15/222    |
| 0.3865      | 40381/104474 | 40507/106202 | 7303/9056 |
| 0.2524      | 26698/105776 | 26769/106204 | 443/9038  |
| 0.05899     | 6253/106006  | 6254/106210  | 106/9064  |
| 0.3661      | 3930/10734   | 4348/13324   | 97/196    |
| 0.008209    | 870/105984   | 870/106210   | 17/8978   |
| 0.000009959 | 1/100408     | 1/106196     | 0/8872    |
| 0.6643      | 64566/97200  | 67597/105406 | 5055/7948 |
| 0.6443      | 68015/105564 | 68030/105596 | 5231/8462 |
| 0.1594      | 16922/106176 | 16924/106210 | 1537/9064 |
| 0.2325      | 24580/105732 | 24675/106192 | 3150/8696 |
| 0.5197      | 44291/85216  | 53554/105526 | 5667/7356 |
| 0.2716      | 28821/106128 | 28828/106210 | 1981/9062 |
| 0.6448      | 66107/102524 | 67905/106190 | 4287/8806 |
| 0.1606      | 17033/106050 | 17047/106210 | 2269/9050 |
| 0.3098      | 32878/106118 | 32886/106210 | 816/9056  |
| 0.1273      | 13482/105908 | 13488/106210 | 1204/9060 |
| 0.2925      | 31010/106000 | 31036/106210 | 4557/9056 |
| 0.5377      | 10372/19290  | 37060/87242  | 1158/1704 |
| 0.09754     | 10313/105736 | 10335/106210 | 206/9044  |
| 0.3562      | 37692/105806 | 37784/106206 | 1987/9044 |
| 0.0004286   | 9/21000      | 10/102372    | 0/2114    |
| 0.532       | 49462/92970  | 52232/106118 | 1349/6692 |
| 0.3606      | 37544/104112 | 37893/106182 | 4786/8726 |
| 0.2722      | 2925/10744   | 3255/13666   | 67/198    |
| 0.2513      | 25993/103436 | 26242/106196 | 1329/9002 |
| 0.00005858  | 6/102422     | 7/105600     | 0/8186    |
| 0.5456      | 5189/9510    | 9142/18312   | 375/477   |
| 0.003683    | 387/105068   | 389/106208   | 11/8960   |

VEP annotated somatic variants

|         |              |              |           |
|---------|--------------|--------------|-----------|
| 0.193   | 4484/23234   | 10825/102590 | 62/2382   |
| 0.5434  | 7850/14446   | 8155/15494   | 626/1362  |
| 0.4115  | 4062/9872    | 5503/15862   | 209/1414  |
| 0.05596 | 913/16316    | 947/18986    | 10/1500   |
| 0.2862  | 28651/100100 | 29873/106080 | 648/8912  |
| 0.05537 | 5440/98250   | 5534/106178  | 132/8714  |
| 0.02517 | 1975/78482   | 2032/105592  | 39/6906   |
| 0.06232 | 6579/105562  | 6584/105722  | 1902/8458 |
| 0.27    | 24656/91310  | 26919/106008 | 910/7730  |
| 0.7351  | 76927/104652 | 77893/106198 | 8305/8924 |
| 0.1421  | 14654/103110 | 14717/106204 | 805/8746  |
| 0.0447  | 4745/106158  | 4748/106210  | 89/9056   |
| 0.3249  | 22873/70392  | 33235/105894 | 2404/7313 |
| 0.326   | 20298/62262  | 31875/104028 | 2281/6985 |
| 0.2267  | 23177/102226 | 23852/106142 | 1245/8996 |
| 0.7218  | 76605/106124 | 76648/106208 | 6265/9020 |
| 0.1417  | 14848/104800 | 14909/106196 | 1168/9016 |
| 0.02393 | 2273/94972   | 2294/106208  | 36/8090   |
| 0.01292 | 1214/93988   | 1276/106046  | 28/7454   |
| 0.2498  | 25695/102866 | 25917/106188 | 1306/8888 |
| 0.4002  | 24830/62038  | 35984/104486 | 4688/6334 |
| 0.2361  | 17503/74120  | 19359/106126 | 3010/7102 |
| 0.08596 | 9063/105432  | 9091/106204  | 277/9056  |
| 0.05447 | 5785/106200  | 5785/106210  | 120/9064  |
| 0.4313  | 22893/53080  | 36597/103856 | 1142/4702 |
| 0.0887  | 9191/103616  | 9287/106184  | 196/8612  |
| 0.4427  | 46946/106038 | 46993/106210 | 789/9046  |
| 0.2679  | 28178/105184 | 28333/106210 | 555/8960  |



VEP annotated somatic variants

|         |              |              |           |
|---------|--------------|--------------|-----------|
| 0.1841  | 19440/105606 | 19453/106020 | 345/8494  |
| 0.6787  | 21198/31232  | 56171/98020  | 3622/4368 |
| 0.5409  | 40778/75390  | 57157/106210 | 1250/7417 |
| 0.2506  | 18045/71994  | 26044/106096 | 448/6676  |
| 0.4441  | 47145/106158 | 47148/106210 | 4236/9066 |
| 0.393   | 41529/105678 | 41656/106190 | 4596/8954 |
| 0.4254  | 45155/106146 | 45166/106210 | 5614/9064 |
| 0.4443  | 47170/106164 | 47184/106210 | 6198/9062 |
| 0.6301  | 66716/105880 | 66801/106210 | 8008/9064 |
| 0.5274  | 51771/98156  | 55044/106074 | 5884/8834 |
| 0.5279  | 51587/97728  | 55046/106074 | 5879/8816 |
| 0.09521 | 6519/68468   | 7076/105182  | 174/4554  |
| 0.01422 | 1509/106102  | 1510/106208  | 34/9052   |
| 0.08971 | 9022/100574  | 9515/105952  | 3731/7864 |
| 0.1946  | 20665/106176 | 20667/106210 | 3136/9058 |
| 0.07448 | 7902/106090  | 7905/106210  | 725/9050  |
| 0.4478  | 47249/105510 | 47272/105716 | 869/8456  |
| 0.07646 | 8019/104878  | 8025/106210  | 131/8960  |
| 0.4904  | 50577/103140 | 51175/106202 | 4513/8800 |
| 0.1841  | 2170/11790   | 8503/79144   | 113/452   |
| 0.5263  | 8545/16236   | 27929/82330  | 391/1772  |
| 0.01795 | 1906/106206  | 1906/106210  | 48/9064   |
| 0.3583  | 38047/106194 | 38047/106210 | 4328/9064 |
| 0.1358  | 11729/86378  | 12708/106144 | 1218/7536 |
| 0.1911  | 14402/75348  | 19269/106194 | 4886/7401 |
| 0.1207  | 9075/75171   | 12550/106192 | 1059/7350 |
| 0.3413  | 24874/72887  | 35039/106184 | 4379/7388 |
| 0.1771  | 18778/106050 | 18785/106206 | 403/9066  |
| 0.2272  | 23569/103716 | 23705/106196 | 694/9004  |
| 0.4787  | 45962/96022  | 48490/106134 | 2543/7910 |
| 0.3647  | 38718/106166 | 38725/106210 | 6870/9052 |
| 0.7058  | 50891/72103  | 72927/106146 | 5105/6715 |
| 0.3001  | 2727/9088    | 5536/26686   | 512/1666  |
| 0.1324  | 13912/105056 | 13948/105648 | 931/8448  |
| 0.01089 | 1148/105466  | 1149/105614  | 16/8466   |
| 0.09162 | 9616/104960  | 9642/105664  | 276/8440  |

VEP annotated somatic variants

|           |              |              |           |
|-----------|--------------|--------------|-----------|
| 0.6138    | 9286/15128   | 11970/20990  | 881/1540  |
| 0.3063    | 5555/18138   | 16217/86946  | 301/1258  |
| 0.8362    | 88686/106064 | 88772/106210 | 6757/9056 |
| 0.3805    | 6475/17018   | 6905/19524   | 306/1548  |
| 0.0216    | 2277/105396  | 2279/105622  | 37/8456   |
| 0.7226    | 76721/106172 | 76730/106210 | 7852/9060 |
| 0.7237    | 76748/106052 | 76798/106210 | 7892/9048 |
| 0.4366    | 46088/105572 | 46183/106204 | 3331/8990 |
| 0.2025    | 21403/105686 | 21429/106186 | 860/8714  |
| 0.1659    | 13236/79764  | 13967/106082 | 262/6530  |
| 0.1658    | 13837/83480  | 15503/105954 | 367/6960  |
| 0.0006507 | 36/55326     | 48/105616    | 2/3836    |
| 0.09577   | 9709/101380  | 9794/106210  | 140/8662  |
| 0.2592    | 27359/105536 | 27367/105650 | 1833/8468 |
| 0.3466    | 35416/102178 | 35918/105688 | 2559/8256 |
| 0.4819    | 51120/106074 | 51139/106208 | 4973/9058 |
| 0.3229    | 33612/104108 | 33911/106106 | 1156/8758 |
| 0.6738    | 71456/106048 | 71520/106206 | 6943/9058 |
| 0.3437    | 36500/106186 | 36502/106210 | 1647/9066 |
| 0.01677   | 1667/99422   | 1680/105612  | 61/8194   |
| 0.06271   | 6612/105444  | 6616/105702  | 101/8438  |
| 0.2973    | 31503/105980 | 31567/106208 | 4949/8946 |
| 0.01508   | 1133/75139   | 1613/105924  | 21/6789   |
| 0.1131    | 12003/106122 | 12016/106204 | 701/9066  |
| 0.4988    | 7986/16010   | 19925/79284  | 159/642   |
| 0.6891    | 72651/105422 | 72737/105590 | 4708/8456 |
| 0.6602    | 66349/100494 | 68994/105440 | 2633/7628 |
| 0.2164    | 22982/106178 | 22982/106210 | 1430/9066 |
| 0.7411    | 77797/104968 | 78149/105714 | 7218/8456 |

VEP annotated somatic variants

|          |              |               |           |
|----------|--------------|---------------|-----------|
| 0.3921   | 35568/90704  | 37633/105496  | 1384/7582 |
| 0.2403   | 25368/105562 | 25381/105828  | 1609/8472 |
| 0.343    | 36084/105192 | 36197/105698  | 916/8462  |
| 0.3451   | 6274/18182   | 6388/19874    | 509/1784  |
| 0.006081 | 638/104920   | 638/105934    | 15/8456   |
| 0.5118   | 49494/96712  | 52651/106098  | 7264/8556 |
| 0.3779   | 38998/103210 | 39757/106022  | 2370/8118 |
| 0.5353   | 11020/20586  | 37758/85386   | 863/2612  |
| 0.382    | 37173/97308  | 39750/105844  | 3123/8800 |
| 0.5455   | 57391/105216 | 57545/105578  | 1967/8456 |
| 0.0187   | 1971/105382  | 1978/106210   | 53/8860   |
| 0.3509   | 33661/95922  | 34461/106180  | 1943/8266 |
| 0.2257   | 23947/106110 | 23953/106208  | 1415/9066 |
| 0.3575   | 37958/106182 | 37958/106208  | 4290/9066 |
| 0.3765   | 39972/106168 | 39987/106210  | 2580/9064 |
| 0.04584  | 4867/106180  | 4867/106210   | 2299/9036 |
| 0.03496  | 3713/106202  | 3713/106210   | 1531/9066 |
| 0.1761   | 18466/104882 | 18523/106208  | 451/9056  |
| 0.1751   | 18574/106080 | 18576/106208  | 450/8984  |
| 0.1068   | 1504/14082   | 2445/32566    | 144/1352  |
| 0.104    | 11041/106164 | 11041/106210  | 269/9048  |
| 0.3043   | 32304/106148 | 32310/106210  | 1272/9066 |
| 0.09322  | 9308/99848   | 9694/105958   | 1589/7656 |
| 0.2655   | 28067/105710 | 28087/106204  | 450/8684  |
| 0.186    | 2240/12040   | 6069/80976    | 56/416    |
| 0.09105  | 8531/93696   | 8716/105092   | 72/6714   |
| 0.06984  | 989/14160    | 3274/101458   | 35/2030   |
| 0.007846 | 578/73666    | 706/106118    | 8/7030    |
| 0.3734   | 39660/106204 | 39662/106210  | 1311/9066 |
| 0.1219   | 12945/106196 | 12946/106210  | 593/9066  |
| 0.299    | 31720/106100 | 31735/106208  | 2444/9062 |
| 0.5233   | 49833/95234  | 52674/105968  | 5493/7866 |
| 0.9707   | 71922/74093  | 102460/105796 | 6759/6794 |
| 0.09339  | 6915/74048   | 9863/105810   | 296/6835  |
| 0.1259   | 11398/90542  | 11796/106192  | 160/7856  |
| 0.2659   | 28147/105836 | 28184/106188  | 1353/8990 |
| 0.1975   | 20671/104650 | 20732/106208  | 473/8724  |
| 0.07454  | 7759/104092  | 7790/106204   | 948/8902  |
| 0.3034   | 31060/102380 | 31519/106184  | 2645/8478 |

VEP annotated somatic variants

|          |              |              |           |
|----------|--------------|--------------|-----------|
| 0.1625   | 16785/103272 | 16829/105878 | 1870/8414 |
| 0.1204   | 12790/106186 | 12790/106210 | 955/9066  |
| 0.5456   | 57854/106030 | 57902/106208 | 6443/9058 |
| 0.369    | 25436/68941  | 37819/106176 | 443/7143  |
| 0.5512   | 38592/70010  | 51329/103950 | 4407/5710 |
| 0.328    | 34746/105936 | 34815/106210 | 2228/9030 |
| 0.2384   | 24162/101354 | 24615/106168 | 2233/8548 |
| 0.1422   | 1871/13162   | 4843/102148  | 457/1966  |
| 0.3025   | 31929/105552 | 31939/105798 | 851/8482  |
| 0.1375   | 724/5266     | 1241/13968   | 13/114    |
| 0.6698   | 68463/102216 | 70995/106138 | 4455/8942 |
| 0.207    | 1792/8655    | 2941/15804   | 16/310    |
| 0.2501   | 26547/106166 | 26554/106210 | 699/9064  |
| 0.04807  | 3662/76180   | 3813/106196  | 1103/7038 |
| 0.2825   | 28911/102354 | 29333/105844 | 2373/8392 |
| 0.02801  | 60/2142      | 128/15630    | 2/96      |
| 0.137    | 8142/59410   | 12434/105596 | 196/5482  |
| 0.6009   | 59508/99036  | 62242/105568 | 4594/8308 |
| 0.3615   | 38302/105942 | 38347/106210 | 2624/9046 |
| 0.7913   | 79396/100342 | 83750/106100 | 7407/8894 |
| 0.04044  | 4250/105086  | 4257/105632  | 81/8462   |
| 0.6761   | 36997/54724  | 64867/105062 | 4469/5925 |
| 0.0265   | 2615/98662   | 2642/106204  | 100/8076  |
| 0.06252  | 6499/103954  | 6516/106208  | 576/9030  |
| 0.06144  | 6508/105928  | 6511/106208  | 578/8920  |
| 0.4268   | 45218/105938 | 45276/106210 | 3159/9036 |
| 0.5541   | 10107/18242  | 31876/84336  | 1168/1984 |
| 0.1049   | 11102/105820 | 11111/106210 | 399/9058  |
| 0.1024   | 10879/106206 | 10879/106210 | 246/9066  |
| 0.001638 | 174/106200   | 174/106210   | 5/9066    |
| 0.02389  | 2533/106012  | 2534/106210  | 553/9052  |
| 0.4152   | 28231/67998  | 37600/103512 | 1494/5768 |
| 0.6278   | 66644/106160 | 66673/106210 | 7229/9064 |

VEP annotated somatic variants

|           |              |              |           |
|-----------|--------------|--------------|-----------|
| 0.4048    | 42890/105966 | 42899/106210 | 1636/9012 |
| 0.1398    | 14270/102088 | 14387/105252 | 165/8122  |
| 0.4375    | 46340/105918 | 46402/106208 | 2903/8922 |
| 0.2377    | 3726/15676   | 4236/25192   | 345/2062  |
| 0.5741    | 60944/106156 | 60957/106210 | 1354/9054 |
| 0.2343    | 23393/99854  | 24646/106184 | 2097/8574 |
| 0.0673    | 3289/48874   | 3997/104522  | 575/3338  |
| 0.1209    | 12392/102516 | 12626/106106 | 1269/8090 |
| 0.09601   | 8490/88426   | 8788/106110  | 129/6062  |
| 0.263     | 27482/104510 | 27549/106206 | 1881/8998 |
| 0.4882    | 36647/75071  | 51947/106202 | 651/7387  |
| 0.0002032 | 15/73804     | 20/106208    | 0/7284    |
| 0.269     | 25702/95536  | 27300/105178 | 2850/8292 |
| 0.3708    | 4956/13366   | 5404/16048   | 245/388   |
| 0.7282    | 77308/106156 | 77315/106210 | 4034/9066 |
| 0.3839    | 40759/106178 | 40769/106208 | 1729/9064 |
| 0.2434    | 25824/106096 | 25829/106198 | 877/9030  |
| 0.4663    | 35172/75431  | 48972/106208 | 4012/7410 |
| 0.294     | 22331/75961  | 30936/106208 | 3229/7435 |
| 0.2032    | 21582/106200 | 21582/106206 | 3263/9066 |
| 0.2551    | 25781/101058 | 26561/106118 | 5677/8980 |
| 0.05673   | 5953/104934  | 5960/105664  | 1130/8460 |
| 0.3876    | 41130/106118 | 41140/106210 | 883/9054  |
| 0.466     | 49420/106056 | 49445/106210 | 5981/9066 |
| 0.003644  | 387/106198   | 387/106210   | 9/9064    |
| 0.1875    | 17175/91622  | 18038/105928 | 806/7374  |
| 0.257     | 27200/105822 | 27261/106210 | 1720/9058 |
| 0.259     | 27460/106012 | 27509/106210 | 1883/9000 |
| 0.04192   | 3551/84702   | 3640/105704  | 65/6188   |
| 0.2983    | 31648/106084 | 31666/106208 | 1552/9064 |
| 0.01049   | 1102/105064  | 1104/106178  | 19/8898   |

VEP annotated somatic variants

|           |              |              |           |
|-----------|--------------|--------------|-----------|
| 0.6047    | 64187/106148 | 64188/106210 | 6307/9066 |
| 0.154     | 16214/105308 | 16246/105618 | 181/8460  |
| 0.2263    | 24026/106146 | 24033/106208 | 3409/9066 |
| 0.2468    | 26207/106166 | 26212/106210 | 1830/9064 |
| 0.9036    | 64209/71057  | 94773/106060 | 6662/7157 |
| 0.00808   | 855/105818   | 855/106210   | 6/8940    |
| 0.01332   | 1395/104722  | 1398/106210  | 17/8842   |
| 0.1062    | 10239/96392  | 10563/105928 | 237/8798  |
| 0.5339    | 55802/104518 | 56357/106198 | 6517/8968 |
| 0.7589    | 74749/98498  | 78329/105880 | 5936/8264 |
| 0.09848   | 10364/105244 | 10424/106206 | 212/9058  |
| 0.2633    | 24336/92442  | 24927/106150 | 1065/7492 |
| 0.2304    | 24245/105226 | 24280/106202 | 677/8738  |
| 0.3692    | 23050/62430  | 33252/102228 | 1693/5654 |
| 0.3099    | 32829/105946 | 32882/106210 | 1635/9056 |
| 0.3888    | 41268/106142 | 41272/106210 | 2891/9058 |
| 0.4591    | 48727/106130 | 48753/106208 | 5300/9064 |
| 0.3737    | 38117/102012 | 38677/106208 | 4148/8772 |
| 0.2599    | 16303/62716  | 21339/105190 | 2814/6546 |
| 0.2187    | 2778/12702   | 3492/24488   | 82/926    |
| 0.05934   | 6222/104856  | 6243/106210  | 124/9052  |
| 0.04526   | 4650/102736  | 4723/106204  | 578/8964  |
| 0.002282  | 230/100774   | 230/106210   | 2/8312    |
| 0.14      | 10154/72537  | 14726/106182 | 326/7205  |
| 0.3788    | 39583/104488 | 39779/105602 | 3663/8356 |
| 0.3192    | 33693/105566 | 33700/105618 | 3379/8466 |
| 0.3182    | 33303/104666 | 33453/105620 | 3302/8318 |
| 0.02333   | 2449/104960  | 2452/106200  | 278/8748  |
| 0.1679    | 17447/103932 | 17717/106102 | 4366/8438 |
| 0.0004883 | 50/102392    | 51/106096    | 1/8078    |
| 0.02707   | 2089/77170   | 2371/106022  | 37/6418   |
| 0.2071    | 21987/106144 | 21993/106210 | 753/9056  |
| 0.09971   | 9272/92988   | 9614/105926  | 999/7698  |
| 0.3721    | 39287/105570 | 39375/106192 | 2180/9034 |

VEP annotated somatic variants

|                                        |                                                             |                                                             |                                                |
|----------------------------------------|-------------------------------------------------------------|-------------------------------------------------------------|------------------------------------------------|
| 0.1882<br>0.0006817                    | 19985/106182<br>69/101222                                   | 19987/106210<br>143/106206                                  | 331/9066<br>2/8542                             |
| 0.7127<br>0.7501<br>0.5161             | 4145/5816<br>79109/105468<br>9467/18342                     | 26060/58136<br>79172/105582<br>10024/20296                  | 169/272<br>7173/8458<br>307/1770               |
| 0.2667                                 | 23608/88532                                                 | 26166/105072                                                | 2934/8196                                      |
| 0.7576<br>0.7081<br>0.7471<br>0.02511  | 79063/104360<br>72742/102734<br>78010/104416<br>2655/105724 | 79931/105868<br>74376/105676<br>78791/105650<br>2659/106210 | 7133/8428<br>6722/8352<br>7363/8250<br>45/9042 |
| 0.7949<br>0.579                        | 84366/106132<br>60450/104406                                | 84407/106200<br>60998/106210                                | 8632/9062<br>3214/8876                         |
| 0.382<br>0.4551                        | 26451/69252<br>48330/106188                                 | 31362/104964<br>48330/106210                                | 626/4378<br>5016/9066                          |
| 0.6536<br>0.292                        | 66767/102146<br>29014/99372                                 | 68865/106108<br>29620/106124                                | 4533/8604<br>3911/8344                         |
| 0.3524                                 | 1920/5448                                                   | 6333/63986                                                  | 62/116                                         |
| 0.266                                  | 24588/92438                                                 | 26966/105792                                                | 4209/8614                                      |
| 0.5459<br>0.004696<br>0.2399<br>0.1974 | 31640/57957<br>30/6388<br>20786/86662<br>20812/105450       | 50934/105810<br>47/15380<br>24777/104796<br>20872/106202    | 1941/5629<br>0/177<br>1775/6504<br>503/9042    |
| 0.5483<br>0.06365<br>0.0003296         | 57288/104482<br>5550/87192<br>35/106174                     | 57790/106006<br>5884/105842<br>35/106192                    | 3553/9020<br>368/7036<br>3/9062                |
| 0.3831                                 | 40554/105852                                                | 40592/106206                                                | 3106/9054                                      |
| 0.3572<br>0.01944                      | 37650/105396<br>2035/104704                                 | 37718/106202<br>2040/105564                                 | 910/8908<br>37/8260                            |
| 0.06486<br>0.01919                     | 6883/106120<br>1543/80426                                   | 6884/106208<br>1591/106192                                  | 724/9010<br>37/7264                            |

VEP annotated somatic variants

|          |              |              |           |
|----------|--------------|--------------|-----------|
| 0.8109   | 11069/13650  | 31092/35790  | 347/420   |
| 0.4274   | 39554/92536  | 40778/99774  | 1028/7776 |
| 0.06055  | 4773/78824   | 5140/105562  | 49/6242   |
| 0.7527   | 79688/105876 | 79820/106208 | 7705/9052 |
| 0.4298   | 32656/75971  | 46334/106208 | 1940/7436 |
| 0.2129   | 14608/68629  | 22014/105846 | 3432/7010 |
| 0.7031   | 53376/75910  | 74436/106208 | 4430/7421 |
| 0.24     | 174/725      | 1476/13162   | 3/56      |
| 0.3672   | 37626/102466 | 38523/106168 | 857/8986  |
| 0.3078   | 32539/105714 | 32612/106202 | 5054/9060 |
| 0.4657   | 49387/106048 | 49456/106210 | 2056/9056 |
| 0.845    | 61062/72259  | 87639/104556 | 1531/6334 |
| 0.008669 | 839/96778    | 844/105712   | 27/7758   |
| 0.3495   | 37083/106118 | 37097/106210 | 4028/9056 |
| 0.3273   | 24180/73876  | 28157/101834 | 1513/5416 |
| 0.3805   | 30008/78858  | 34143/101924 | 1408/5784 |
| 0.06302  | 6665/105760  | 6684/106210  | 1192/9038 |
| 0.4079   | 42889/105158 | 43547/106190 | 2806/9000 |
| 0.1724   | 17230/99946  | 17406/105880 | 580/7788  |
| 0.000408 | 31/75974     | 42/106208    | 1/7421    |
| 0.6279   | 66119/105306 | 66466/106208 | 7525/9006 |
| 0.001271 | 135/106180   | 135/106210   | 1/9058    |
| 0.001199 | 72/60028     | 91/105488    | 1/4434    |
| 0.08788  | 9087/103404  | 9236/106202  | 112/9000  |
| 0.2498   | 14941/59822  | 18551/105748 | 1126/5782 |
| 0.1016   | 10400/102342 | 10457/105938 | 155/8162  |
| 0.2569   | 27213/105942 | 27231/106210 | 2276/9054 |
| 0.1899   | 20153/106142 | 20154/106210 | 1113/9064 |
| 0.1423   | 15078/105972 | 15078/106210 | 1355/9066 |
| 0.4197   | 6749/16080   | 14558/51952  | 1028/1374 |
| 0.4253   | 43729/102822 | 44186/105222 | 5534/8362 |



VEP annotated somatic variants

|            |              |              |           |
|------------|--------------|--------------|-----------|
| 0.07504    | 288/3838     | 1533/67760   | 34/1184   |
| 0.4432     | 46220/104298 | 46794/106204 | 7114/9052 |
| 0.265      | 26973/101768 | 27675/106176 | 3916/8570 |
| 0.3319     | 35020/105500 | 35104/106208 | 1853/9052 |
| 0.05201    | 778/14958    | 830/20500    | 66/1346   |
| 0.004035   | 410/101600   | 411/106208   | 5/8528    |
| 0.5848     | 44384/75894  | 61327/106202 | 6079/7429 |
| 0.4734     | 5070/10710   | 5670/14072   | 74/194    |
| 0.7485     | 79070/105634 | 79410/106184 | 7929/8870 |
| 0.5949     | 17526/29462  | 41193/98632  | 2010/2964 |
| 0.3945     | 41646/105568 | 41744/105964 | 3573/8486 |
| 0.8498     | 89716/105576 | 89756/105628 | 7728/8464 |
| 0.3859     | 38682/100242 | 39253/105898 | 2363/7940 |
| 0.3605     | 38133/105786 | 38161/106210 | 696/8970  |
| 0.01476    | 1549/104946  | 1556/106210  | 23/8786   |
| 0.2999     | 21820/72766  | 24769/105532 | 1435/6018 |
| 0.2139     | 22677/105996 | 22729/106210 | 3921/9042 |
| 0.3835     | 40719/106190 | 40720/106210 | 1729/9066 |
| 0.6784     | 72028/106174 | 72035/106210 | 8007/9062 |
| 0.3888     | 40630/104514 | 40944/106192 | 1844/8838 |
| 0.5901     | 61568/104332 | 62481/106198 | 4078/8940 |
| 0.2995     | 31487/105116 | 31776/105716 | 2605/8412 |
| 0.2881     | 30322/105236 | 30425/105874 | 2319/8464 |
| 0.1384     | 1863/13458   | 1999/16506   | 12/398    |
| 0.5881     | 62055/105524 | 62178/105808 | 5288/8458 |
| 0.6099     | 45130/73996  | 64342/106130 | 3477/7173 |
| 0.5302     | 6915/13042   | 11205/27358  | 328/812   |
| 0.6856     | 40322/58810  | 65462/103628 | 1711/3996 |
| 0.2457     | 26097/106200 | 26097/106210 | 782/9066  |
| 0.2028     | 21382/105438 | 21393/105626 | 524/8466  |
| 0.1121     | 11904/106202 | 11904/106210 | 1295/9066 |
| 0.3285     | 30439/92670  | 32684/105812 | 5638/8074 |
| 0.00001036 | 1/96504      | 1/106204     | 0/8146    |
| 0.5663     | 60112/106150 | 60152/106210 | 1388/9064 |
| 0.5532     | 50762/91754  | 55232/105060 | 4670/8412 |
| 0.005907   | 626/105976   | 626/106210   | 14/9020   |

VEP annotated somatic variants

|          |              |              |           |
|----------|--------------|--------------|-----------|
| 0.148    | 15680/105922 | 15690/106206 | 2806/8988 |
| 0.03488  | 3692/105834  | 3701/106210  | 69/8992   |
| 0.5027   | 53267/105968 | 53306/106210 | 4355/9038 |
| 0.527    | 55916/106096 | 55943/106210 | 6776/9060 |
| 0.4455   | 32654/73290  | 36509/104988 | 1823/5842 |
| 0.3483   | 34401/98756  | 36361/105182 | 1478/8204 |
| 0.3982   | 35473/89078  | 36633/105528 | 1441/7028 |
| 0.3579   | 36946/103218 | 37359/105610 | 1900/8028 |
| 0.064    | 6659/104046  | 6689/106210  | 106/8882  |
| 0.008044 | 833/103554   | 838/106210   | 12/8970   |
| 0.01154  | 1211/104894  | 1215/106210  | 26/8588   |
| 0.3548   | 37538/105800 | 37641/106206 | 2195/9052 |
| 0.4513   | 43423/96226  | 45724/106110 | 1962/8398 |
| 0.153    | 16251/106196 | 16252/106210 | 433/9066  |
| 0.7233   | 72471/100194 | 75294/105634 | 1576/7774 |
| 0.2979   | 6104/20492   | 16189/98758  | 112/2388  |
| 0.4296   | 45591/106126 | 45598/106210 | 4551/9066 |
| 0.2887   | 27511/95304  | 29477/106016 | 2496/8556 |
| 0.004057 | 426/105000   | 426/105626   | 11/8442   |
| 0.01008  | 1058/104936  | 1058/106206  | 18/9056   |
| 0.6103   | 63982/104834 | 64460/106168 | 3490/8950 |
| 0.1035   | 7312/70644   | 8384/104018  | 1157/5158 |
| 0.3595   | 5751/15996   | 6189/18904   | 193/1506  |
| 0.5352   | 47465/88686  | 51084/105662 | 3259/7092 |
| 0.003057 | 15/4906      | 29/22046     | 1/174     |
| 0.01548  | 576/37202    | 723/104970   | 9/2870    |
| 0.0142   | 174/12255    | 475/93784    | 3/2049    |
| 0.4803   | 35751/74436  | 45440/101770 | 2079/5098 |
| 0.2104   | 22128/105148 | 22142/105776 | 349/8466  |
| 0.04672  | 2185/46766   | 2899/105458  | 353/4388  |
| 0.02067  | 2184/105678  | 2184/106210  | 207/9062  |
| 0.3407   | 35148/103176 | 35608/105846 | 3545/8396 |
| 0.1163   | 12333/106066 | 12347/106210 | 210/9048  |
| 0.02714  | 1839/67766   | 2077/106160  | 41/4510   |
| 0.7574   | 80365/106110 | 80407/106204 | 8045/9024 |
| 0.166    | 431/2596     | 4255/85396   | 28/152    |
| 0.1629   | 17274/106036 | 17283/106210 | 1439/9040 |
| 0.1075   | 7373/68572   | 8276/105576  | 1727/5804 |
| 0.2843   | 30183/106160 | 30197/106208 | 2415/9064 |

VEP annotated somatic variants

|         |              |              |           |
|---------|--------------|--------------|-----------|
| 0.06986 | 7415/106138  | 7416/106210  | 2222/9044 |
| 0.6584  | 69870/106120 | 69900/106210 | 6659/9060 |
| 0.02346 | 2481/105758  | 2492/106190  | 67/8952   |
| 0.1882  | 2006/10660   | 2047/12696   | 22/188    |
| 0.1397  | 14832/106186 | 14834/106210 | 327/9066  |
| 0.0898  | 1658/18464   | 4076/82292   | 168/1808  |
| 0.2062  | 21149/102556 | 21556/106160 | 331/8130  |
| 0.4507  | 47762/105982 | 47782/106210 | 4598/8992 |
| 0.1516  | 16004/105600 | 16019/106208 | 635/9034  |
| 0.4807  | 51016/106126 | 51030/106204 | 3785/9032 |
| 0.7442  | 54531/73274  | 77882/106108 | 7015/7415 |
| 0.2631  | 16360/62170  | 22220/104656 | 1969/5064 |
| 0.02338 | 2381/101822  | 2400/105832  | 25/7944   |
| 0.2991  | 27289/91222  | 28523/106148 | 1856/7474 |
| 0.5659  | 60084/106174 | 60089/106210 | 2592/9066 |
| 0.04922 | 5223/106110  | 5223/106210  | 532/9066  |
| 0.04603 | 4727/102692  | 4758/106104  | 76/8508   |
| 0.06404 | 3137/48984   | 4148/104958  | 60/4858   |
| 0.2542  | 26933/105968 | 26977/106204 | 1310/9054 |
| 0.3004  | 31821/105914 | 31861/106196 | 3982/9064 |
| 0.7392  | 78415/106084 | 78459/106206 | 7462/9062 |
| 0.0214  | 2264/105812  | 2265/106204  | 45/9026   |
| 0.1579  | 15214/96364  | 15765/105998 | 2217/8262 |
| 0.1614  | 15951/98814  | 16641/106112 | 2806/8932 |
| 0.2211  | 21192/95840  | 22708/105564 | 5264/7792 |
| 0.06688 | 6591/98552   | 6902/106148  | 938/8360  |
| 0.256   | 27183/106196 | 27187/106210 | 1750/9066 |
| 0.249   | 18682/75035  | 25823/106204 | 4943/7354 |
| 0.1524  | 16178/106168 | 16180/106210 | 289/9058  |
| 0.05302 | 4703/88698   | 5000/106194  | 83/7358   |
| 0.3819  | 17857/46754  | 34344/105014 | 1013/5065 |
| 0.02255 | 2371/105138  | 2379/106202  | 1360/8854 |
| 0.3976  | 12645/31806  | 25095/99000  | 1106/1984 |
| 0.3092  | 32692/105740 | 32725/106194 | 559/8962  |

VEP annotated somatic variants

|            |              |              |           |
|------------|--------------|--------------|-----------|
| 0.1563     | 16298/104266 | 16401/106208 | 556/8700  |
| 0.1342     | 14042/104672 | 14093/105758 | 1333/8394 |
| 0.01138    | 1208/106186  | 1208/106210  | 26/9064   |
| 0.1152     | 12222/106122 | 12224/106210 | 1428/9064 |
| 0.2023     | 21001/103816 | 21293/106188 | 1778/8666 |
| 0.00000966 | 1/103516     | 1/106178     | 0/8702    |
| 0.4987     | 52856/105982 | 52918/106202 | 7441/9064 |
| 0.007432   | 785/105628   | 786/106210   | 23/8730   |
| 0.4743     | 46634/98328  | 47718/106114 | 1542/7222 |
| 0.2979     | 30503/102388 | 30903/106174 | 2355/8698 |
| 0.1621     | 17146/105758 | 17185/106206 | 2144/9006 |
| 0.3403     | 35271/103646 | 35957/106188 | 2757/8554 |
| 0.3496     | 36339/103948 | 36611/106186 | 3173/9002 |
| 0.4114     | 13257/32222  | 34882/100162 | 1231/3368 |
| 0.3427     | 35177/102654 | 36208/106202 | 1738/8724 |
| 0.3121     | 2578/8260    | 4003/15446   | 57/396    |
| 0.2481     | 26147/105402 | 26176/105652 | 871/8454  |
| 0.1551     | 16459/106116 | 16462/106210 | 1278/9058 |
| 0.175      | 18581/106154 | 18585/106210 | 2261/9060 |
| 0.3336     | 15954/47822  | 21970/104192 | 2230/4190 |
| 0.2202     | 22635/102792 | 22908/106088 | 1390/8454 |
| 0.3895     | 41322/106090 | 41352/106210 | 3208/9034 |
| 0.347      | 36616/105510 | 36659/106210 | 2807/8992 |
| 0.1899     | 20047/105572 | 20094/105840 | 2174/8460 |
| 0.287      | 29145/101536 | 30141/106140 | 2469/8988 |
| 0.1705     | 17933/105184 | 17949/105620 | 388/8434  |
| 0.06552    | 6959/106206  | 6959/106210  | 82/9066   |
| 0.2641     | 27865/105504 | 27987/106206 | 3210/9012 |
| 0.4976     | 20605/41412  | 32262/101362 | 1396/2832 |
| 0.4093     | 41848/102248 | 43078/106164 | 3955/9030 |
| 0.1902     | 14229/74807  | 19623/106208 | 750/7027  |
| 0.4921     | 34059/69212  | 44755/105020 | 1243/5258 |
| 0.1271     | 12588/99038  | 13290/106140 | 252/8724  |
| 0.0831     | 8762/105440  | 8769/105616  | 369/8444  |
| 0.4336     | 45774/105560 | 45787/105626 | 4719/8464 |

VEP annotated somatic variants

|         |              |              |           |
|---------|--------------|--------------|-----------|
| 0.2192  | 22652/103334 | 23018/105602 | 1724/8330 |
| 0.266   | 28066/105524 | 28082/105728 | 3585/8466 |
| 0.6517  | 66927/102702 | 67564/105166 | 5922/8082 |
| 0.4089  | 43135/105496 | 43327/105882 | 7065/8482 |
| 0.3274  | 34556/105544 | 34583/106080 | 849/8448  |
| 0.4298  | 3870/9004    | 9772/48356   | 26/186    |
| 0.341   | 35681/104634 | 35818/105748 | 621/8192  |
| 0.416   | 39586/95148  | 41051/103206 | 5864/6874 |
| 0.4012  | 41276/102884 | 42261/105348 | 5762/7728 |
| 0.2934  | 16258/55408  | 24881/104882 | 544/4358  |
| 0.5735  | 30520/53220  | 51745/103706 | 2518/4414 |
| 0.4503  | 4889/10858   | 6540/18854   | 98/216    |
| 0.2913  | 2452/8416    | 4113/15454   | 47/222    |
| 0.2472  | 25908/104816 | 26085/105982 | 2575/8370 |
| 0.261   | 27621/105824 | 27641/106208 | 2959/9064 |
| 0.351   | 36383/103646 | 37067/106138 | 2814/8592 |
| 0.2007  | 2266/11290   | 7426/55680   | 193/500   |
| 0.3807  | 1815/4768    | 11569/86764  | 158/788   |
| 0.2225  | 6525/29322   | 11982/102106 | 783/2828  |
| 0.1677  | 13583/80992  | 17383/106042 | 2693/6514 |
| 0.1096  | 11623/106046 | 11635/106210 | 174/9064  |
| 0.1344  | 14261/106112 | 14284/106210 | 593/9058  |
| 0.5727  | 58550/102242 | 59971/106182 | 4506/8738 |
| 0.525   | 39705/75624  | 54479/105710 | 3571/5562 |
| 0.371   | 39333/106014 | 39352/106208 | 2422/9024 |
| 0.311   | 27172/87360  | 29941/105554 | 2282/7570 |
| 0.1831  | 18685/102024 | 19366/106188 | 1288/8282 |
| 0.612   | 46047/75236  | 64960/106208 | 3949/7358 |
| 0.405   | 42198/104200 | 42819/106190 | 3199/8958 |
| 0.6211  | 43725/70404  | 63964/106098 | 4494/6876 |
| 0.6048  | 45323/74934  | 63419/106210 | 4605/7415 |
| 0.6051  | 45319/74893  | 63421/106210 | 4606/7413 |
| 0.3787  | 6612/17462   | 15113/86742  | 1246/2464 |
| 0.4542  | 47812/105272 | 48045/106202 | 5166/9034 |
| 0.3707  | 36936/99648  | 38483/106108 | 2481/8796 |
| 0.276   | 27425/99362  | 28695/106012 | 2979/8964 |
| 0.5492  | 15706/28600  | 25398/91582  | 1802/3318 |
| 0.06176 | 1125/18216   | 2943/97782   | 25/1706   |
| 0.3746  | 487/1300     | 2292/16236   | 143/234   |

VEP annotated somatic variants

|            |              |               |           |
|------------|--------------|---------------|-----------|
| 0.1131     | 11485/101506 | 11813/106146  | 729/8800  |
| 0.06805    | 7045/103530  | 7082/104898   | 109/8472  |
| 0.2011     | 20849/103688 | 20914/106208  | 2450/8918 |
| 0.3984     | 34318/86132  | 39014/105946  | 2435/6792 |
| 0.1001     | 9772/97584   | 10083/106202  | 1730/8302 |
| 0.5762     | 60510/105020 | 60819/106208  | 4989/8940 |
| 0.232      | 24619/106100 | 24630/106210  | 481/9046  |
| 0.007736   | 811/104832   | 811/106210    | 6/8604    |
| 0.008173   | 868/106202   | 868/106210    | 35/9066   |
| 0.008982   | 793/88290    | 809/106202    | 6/7852    |
| 0.489      | 25906/52980  | 44224/102216  | 2087/4222 |
| 0.5105     | 26192/51310  | 37371/104896  | 3432/5510 |
| 0.2223     | 23488/105658 | 23534/106210  | 4699/9050 |
| 0.2365     | 24868/105152 | 24928/106202  | 1673/8844 |
| 0.9465     | 70668/74662  | 100062/106196 | 7147/7370 |
| 0.4599     | 48526/105514 | 48746/105956  | 5860/8498 |
| 0.2982     | 30783/103218 | 30974/106208  | 3113/8796 |
| 0.2355     | 24395/103608 | 24717/105804  | 5141/8038 |
| 0.3479     | 36896/106056 | 36936/106210  | 5525/9050 |
| 0.8305     | 29286/35264  | 73697/96342   | 2596/3282 |
| 0.2642     | 26724/101138 | 27434/106176  | 921/8534  |
| 0.7096     | 26355/37140  | 61560/98386   | 1531/3578 |
| 0.002706   | 36/13304     | 94/92608      | 1/374     |
| 0.00009059 | 6/66233      | 12/106198     | 0/6683    |
| 0.4763     | 50167/105332 | 50367/106198  | 5116/9054 |
| 0.3328     | 35329/106148 | 35336/106210  | 798/9066  |
| 0.1307     | 13828/105774 | 13976/106204  | 904/9046  |
| 0.1591     | 16159/101584 | 16350/106140  | 530/8494  |
| 0.5506     | 58351/105976 | 58420/106210  | 2192/9058 |
| 0.5607     | 59467/106052 | 59490/106210  | 6751/9064 |
| 0.2845     | 29860/104956 | 29960/106168  | 568/8656  |
| 0.5008     | 53036/105906 | 53062/106204  | 2283/8834 |
| 0.4523     | 45885/101444 | 46801/105870  | 2623/8174 |
| 0.6859     | 71196/103802 | 72224/106172  | 5895/8856 |
| 0.752      | 14436/19196  | 62310/86238   | 1079/1182 |

VEP annotated somatic variants

|           |              |              |           |
|-----------|--------------|--------------|-----------|
| 0.3717    | 14553/39150  | 30461/102050 | 866/3714  |
| 0.462     | 29382/63594  | 42291/104798 | 611/5016  |
| 0.4965    | 52009/104752 | 52226/105538 | 2125/8456 |
| 0.4717    | 50079/106158 | 50087/106210 | 5865/9062 |
| 0.007168  | 654/91238    | 686/105698   | 7/7534    |
| 0.5123    | 49821/97248  | 53762/104766 | 5099/7648 |
| 0.3122    | 33130/106106 | 33135/106208 | 601/9062  |
| 0.2667    | 2820/10572   | 3338/14612   | 36/190    |
| 0.2293    | 22759/99274  | 23452/106116 | 772/7878  |
| 0.4097    | 43174/105388 | 43297/106206 | 1948/8944 |
| 0.5665    | 42005/74147  | 60122/106208 | 1101/7222 |
| 0.3363    | 2281/6782    | 17856/85866  | 329/1550  |
| 0.369     | 17851/48378  | 26593/104358 | 875/3660  |
| 0.6519    | 68474/105030 | 68974/106192 | 4175/9026 |
| 0.6588    | 69924/106140 | 69937/106208 | 4198/9064 |
| 0.2652    | 26196/98790  | 27478/105896 | 3990/8814 |
| 0.1552    | 16422/105782 | 16448/106206 | 2736/9064 |
| 0.7948    | 84416/106204 | 84416/106210 | 4162/9064 |
| 0.4573    | 44530/97366  | 47034/106162 | 3523/8332 |
| 0.08434   | 8803/104378  | 8819/106194  | 453/8804  |
| 0.5836    | 61549/105460 | 61748/106202 | 2272/9032 |
| 0.3998    | 42440/106158 | 42447/106210 | 3984/9066 |
| 0.1605    | 16629/103578 | 16767/106186 | 855/8694  |
| 0.003213  | 338/105206   | 343/106192   | 131/8816  |
| 0.0000346 | 2/57804      | 4/106110     | 0/4852    |
| 0.5759    | 58899/102270 | 59758/105656 | 3767/8142 |
| 0.5153    | 54364/105494 | 54467/105902 | 4064/8468 |
| 0.4185    | 43245/103342 | 44035/106196 | 2113/8782 |
| 0.3383    | 35912/106164 | 35916/106210 | 4940/9064 |
| 0.4123    | 6113/14828   | 6868/18814   | 732/1318  |
| 0.3897    | 40830/104768 | 41138/106182 | 5645/8956 |
| 0.9043    | 15288/16906  | 17153/19260  | 1288/1546 |
| 0.8682    | 16172/18628  | 55058/64652  | 1594/1804 |

VEP annotated somatic variants

|            |              |              |           |
|------------|--------------|--------------|-----------|
| 0.8867     | 48328/54502  | 89332/103170 | 4527/4816 |
| 0.00119    | 63/52962     | 69/106136    | 2/4910    |
| 0.008019   | 136/16960    | 305/83948    | 0/1460    |
| 0.2404     | 3141/13068   | 3400/16366   | 43/380    |
| 0.125      | 13278/106192 | 13278/106210 | 1079/9064 |
| 0.307      | 30757/100180 | 32120/106148 | 472/8676  |
| 0.2091     | 22145/105918 | 22160/106210 | 1778/8960 |
| 0.2136     | 22572/105672 | 22603/106206 | 2216/9048 |
| 0.04494    | 4759/105908  | 4760/106210  | 988/9046  |
| 0.08355    | 8784/105140  | 8815/106208  | 357/9046  |
| 0.5263     | 55655/105750 | 55777/106198 | 2594/8956 |
| 0.5305     | 53823/101450 | 55612/106122 | 3291/9012 |
| 0.08914    | 8639/96916   | 8832/106204  | 241/7798  |
| 0.002826   | 280/99066    | 290/106190   | 6/8034    |
| 0.3222     | 33660/104480 | 33817/106202 | 2682/8866 |
| 0.5401     | 5033/9318    | 30605/83426  | 1057/2034 |
| 0.05964    | 829/13900    | 2523/96600   | 13/818    |
| 0.2527     | 25507/100930 | 26043/106162 | 5742/9008 |
| 0.1851     | 19297/104226 | 19394/106204 | 789/8850  |
| 0.1228     | 13031/106078 | 13039/106210 | 273/9036  |
| 0.5857     | 61421/104864 | 61850/106168 | 1712/8660 |
| 0.313      | 3718/11878   | 4587/17096   | 44/432    |
| 0.08539    | 8992/105306  | 9005/106210  | 200/9058  |
| 0.00009088 | 1/11004      | 6/64902      | 0/688     |
| 0.152      | 15172/99820  | 15387/106180 | 1138/8794 |
| 0.1768     | 17429/98584  | 17852/106094 | 706/7950  |
| 0.5701     | 10851/19033  | 41222/90382  | 1318/1913 |
| 0.163      | 16550/101564 | 16914/105824 | 277/8012  |
| 0.2165     | 15527/71730  | 16695/106162 | 275/6016  |
| 0.5044     | 23510/46612  | 40395/102446 | 1047/2648 |
| 0.7935     | 84248/106170 | 84265/106210 | 7822/9064 |
| 0.03352    | 3545/105758  | 3549/106210  | 640/9014  |



VEP annotated somatic variants

|          |              |              |           |
|----------|--------------|--------------|-----------|
| 0.398    | 41614/104560 | 41863/106192 | 1235/8838 |
| 0.7791   | 82465/105842 | 82687/106206 | 7594/9062 |
| 0.1156   | 5299/45822   | 9327/104992  | 257/4150  |
| 0.2485   | 26315/105886 | 26365/106210 | 3228/9026 |
| 0.1939   | 20522/105844 | 20553/106210 | 1980/9048 |
| 0.2605   | 27465/105428 | 27494/105638 | 2726/8426 |
| 0.1081   | 11143/103038 | 11425/106098 | 1874/7850 |
| 0.4825   | 50428/104524 | 50961/106190 | 1465/8908 |
| 0.08485  | 9008/106170  | 9008/106210  | 1253/9066 |
| 0.6531   | 33900/51903  | 59331/104792 | 5324/5734 |
| 0.2502   | 26564/106176 | 26564/106210 | 454/9066  |
| 0.008464 | 895/105740   | 896/106210   | 590/9064  |
| 0.4696   | 20292/43214  | 37511/103386 | 720/3128  |
| 0.5501   | 58393/106152 | 58401/106210 | 6314/9066 |
| 0.08694  | 9055/104150  | 9072/106206  | 724/9036  |
| 0.1709   | 12990/76018  | 17667/106208 | 3188/7438 |
| 0.02867  | 2938/102482  | 2986/106208  | 41/8752   |
| 0.1248   | 8282/66352   | 9737/102894  | 1145/5182 |
| 0.006554 | 695/106050   | 695/106210   | 13/9062   |
| 0.1459   | 14632/100266 | 14891/105894 | 1149/7850 |
| 0.3338   | 32556/97540  | 34248/105618 | 3816/7398 |
| 0.4708   | 21941/46606  | 34781/103818 | 3086/4184 |
| 0.01587  | 1546/97396   | 1579/106130  | 27/7608   |
| 0.7879   | 79333/100688 | 82935/106012 | 5905/8562 |
| 0.3146   | 33246/105680 | 33314/106210 | 3599/9058 |
| 0.1874   | 19825/105802 | 19831/106210 | 1222/9064 |

VEP annotated somatic variants

|          |              |              |           |
|----------|--------------|--------------|-----------|
| 0.2023   | 20871/103156 | 20991/106192 | 2113/8994 |
| 0.6866   | 34944/50892  | 62269/102812 | 3812/4558 |
| 0.534    | 28372/53134  | 45860/101284 | 1785/4020 |
| 0.001701 | 14/8232      | 18/30690     | 1/612     |
| 0.2651   | 28068/105878 | 28101/106210 | 1736/9056 |
| 0.6266   | 66316/105828 | 66485/106208 | 3327/9034 |
| 0.2394   | 25307/105728 | 25350/106208 | 470/8978  |
| 0.5608   | 59551/106194 | 59551/106210 | 6634/9066 |
| 0.4345   | 45461/104638 | 45677/106206 | 5308/9000 |
| 0.2414   | 25173/104292 | 25550/106202 | 6548/8940 |
| 0.5099   | 10701/20988  | 27268/96434  | 524/1064  |
| 0.0835   | 8724/104476  | 8743/105582  | 1852/8368 |
| 0.03126  | 3246/103848  | 3257/105600  | 74/8336   |
| 0.08721  | 9253/106104  | 9263/106210  | 937/9054  |
| 0.1483   | 15553/104894 | 15600/105788 | 1521/8394 |
| 0.2796   | 29607/105888 | 29682/106208 | 1026/8942 |
| 0.177    | 18790/106184 | 18791/106210 | 588/9060  |
| 0.2094   | 22221/106110 | 22224/106210 | 1307/9042 |
| 0.0214   | 2272/106178  | 2272/106210  | 60/9064   |
| 0.3283   | 3555/10828   | 4522/15472   | 64/218    |
| 0.3634   | 37516/103244 | 37746/106178 | 2388/8544 |
| 0.5146   | 54485/105876 | 54584/106208 | 3445/9038 |
| 0.008636 | 767/88812    | 788/105826   | 21/6556   |
| 0.2341   | 23253/99328  | 23484/105562 | 1250/7522 |
| 0.3334   | 35352/106028 | 35365/106210 | 2083/9064 |
| 0.1049   | 11047/105354 | 11069/106210 | 976/8964  |
| 0.15     | 8440/56253   | 13688/105742 | 1105/6312 |
| 0.3557   | 6020/16922   | 6534/19312   | 573/1532  |
| 0.3065   | 32430/105818 | 32488/106210 | 518/9062  |
| 0.02496  | 2454/98336   | 2505/106138  | 46/8858   |
| 0.3418   | 36236/106012 | 36293/106210 | 804/9056  |
| 0.5778   | 61343/106158 | 61364/106210 | 5997/9066 |
| 0.004288 | 325/75799    | 484/106204   | 5/7239    |
| 0.1915   | 20306/106056 | 20319/106210 | 1049/9042 |

VEP annotated somatic variants

|          |              |              |           |
|----------|--------------|--------------|-----------|
| 0.6987   | 52668/75382  | 73140/106208 | 6717/7423 |
| 0.394    | 41486/105288 | 41690/106206 | 7859/9022 |
| 0.2013   | 19444/96582  | 20344/105830 | 2473/8672 |
| 0.4261   | 44878/105324 | 44976/105670 | 4123/8470 |
| 0.01143  | 1183/103518  | 1188/106210  | 32/9030   |
| 0.2713   | 28774/106062 | 28793/106210 | 1541/9058 |
| 0.001776 | 175/98546    | 179/106182   | 0/8864    |
| 0.4257   | 43513/102208 | 44243/106030 | 2301/8170 |
| 0.0974   | 10324/105994 | 10350/106206 | 1635/9054 |
| 0.1437   | 15257/106158 | 15260/106210 | 1463/9056 |
| 0.02323  | 1486/63976   | 1843/106000  | 34/6140   |
| 0.02403  | 2548/106034  | 2548/106210  | 61/9036   |
| 0.5068   | 53753/106054 | 53783/106208 | 3834/9064 |
| 0.1956   | 20412/104364 | 20437/105634 | 1620/8456 |
| 0.3984   | 23789/59708  | 36234/106072 | 372/5467  |
| 0.00219  | 229/104554   | 229/106204   | 2/8776    |
| 0.2308   | 24417/105788 | 24453/106210 | 607/9036  |
| 0.6125   | 64673/105594 | 64877/106204 | 1511/8954 |
| 0.3812   | 40473/106186 | 40475/106210 | 2157/9066 |
| 0.2859   | 30185/105568 | 30199/105690 | 2165/8466 |
| 0.2877   | 27302/94898  | 27537/98064  | 3047/8758 |
| 0.2745   | 28992/105628 | 29067/106210 | 1363/8958 |
| 0.3769   | 40012/106156 | 40021/106210 | 7905/9062 |
| 0.3786   | 40205/106180 | 40207/106210 | 7790/9066 |
| 0.1652   | 17237/104368 | 17418/106204 | 1812/9004 |
| 0.22     | 23349/106126 | 23355/106210 | 407/9060  |
| 0.6331   | 67152/106068 | 67246/106210 | 8059/9062 |
| 0.2554   | 24460/95786  | 25715/105494 | 319/6946  |
| 0.06225  | 6611/106196  | 6611/106210  | 103/9064  |
| 0.2626   | 23648/90042  | 26700/106024 | 1575/7258 |
| 0.02978  | 2926/98246   | 2979/106104  | 69/7608   |
| 0.009841 | 1028/104466  | 1029/106202  | 29/8658   |
| 0.7213   | 76488/106042 | 76548/106210 | 6614/9062 |

VEP annotated somatic variants

|            |              |              |           |
|------------|--------------|--------------|-----------|
| 0.3824     | 33144/86672  | 36235/106034 | 5371/8064 |
| 0.000464   | 4/8620       | 31/63860     | 0/308     |
| 0.007368   | 470/63788    | 518/106176   | 7/5834    |
| 0.1797     | 13010/72397  | 18959/106208 | 1565/7253 |
| 0.1366     | 6401/46876   | 7920/105688  | 129/4364  |
| 0.4128     | 30384/73612  | 40099/104290 | 552/6116  |
| 0.1273     | 13515/106196 | 13515/106210 | 2026/9062 |
| 0.1498     | 11207/74820  | 13277/104940 | 1391/5470 |
| 0.1533     | 5892/38423   | 11635/104812 | 141/4235  |
| 0.1943     | 20097/103436 | 20376/106096 | 2217/8328 |
| 0.2289     | 22906/100074 | 23899/106136 | 2689/8882 |
| 0.4072     | 13200/32416  | 27187/101142 | 1241/2936 |
| 0.001959   | 33/16842     | 35/19710     | 0/1524    |
| 0.3407     | 3319/9742    | 4430/16474   | 22/270    |
| 0.5414     | 327/604      | 2203/8876    | 123/202   |
| 0.5488     | 7478/13626   | 8292/16224   | 340/428   |
| 0.3942     | 41711/105822 | 41773/106210 | 1206/9018 |
| 0.2587     | 25267/97668  | 25909/106204 | 911/8330  |
| 0.0707     | 1110/15700   | 1313/20958   | 62/1520   |
| 0.5806     | 61531/105986 | 61580/106210 | 6989/9062 |
| 0.000471   | 6/12738      | 8/99598      | 0/688     |
| 0.4035     | 42829/106132 | 42839/106210 | 7022/9066 |
| 0.00006165 | 6/97318      | 6/106208     | 1/8098    |
| 0.1752     | 18487/105500 | 18490/105584 | 1912/8464 |
| 0.2568     | 26743/104136 | 26990/106188 | 3108/9014 |
| 0.2745     | 28578/104108 | 28693/105760 | 696/8256  |
| 0.7869     | 82963/105430 | 83041/105572 | 2804/8446 |
| 0.3657     | 38587/105526 | 38605/105682 | 2648/8470 |
| 0.6362     | 66934/105208 | 67084/105604 | 4489/8464 |
| 0.001451   | 29/19992     | 85/101856    | 1/2452    |
| 0.01014    | 1077/106186  | 1077/106210  | 13/9062   |
| 0.02214    | 2347/106018  | 2348/106198  | 41/9064   |
| 0.6784     | 71926/106024 | 72015/106204 | 8405/9032 |

VEP annotated somatic variants

|          |              |              |           |
|----------|--------------|--------------|-----------|
| 0.7354   | 77954/106004 | 78079/106206 | 6565/9028 |
| 0.005888 | 616/104624   | 616/106204   | 515/8830  |
| 0.08961  | 9513/106162  | 9519/106210  | 1317/9058 |
| 0.3323   | 35275/106170 | 35285/106208 | 992/9066  |
| 0.6584   | 69871/106126 | 69895/106210 | 4675/9046 |
| 0.3441   | 36532/106160 | 36541/106210 | 1660/9064 |
| 0.3589   | 36123/100660 | 37613/106074 | 3625/8666 |
| 0.6645   | 70469/106044 | 70534/106206 | 7747/9040 |
| 0.6022   | 63771/105900 | 63858/106208 | 7413/9052 |
| 0.5128   | 54119/105536 | 54304/106204 | 3290/8950 |
| 0.01044  | 1070/102462  | 1085/105832  | 18/7900   |
| 0.001533 | 157/102394   | 157/105582   | 1/8228    |
| 0.07953  | 1008/12674   | 1307/27738   | 41/1476   |
| 0.1643   | 8270/50340   | 11309/104066 | 107/3190  |
| 0.4745   | 49081/103432 | 49783/106206 | 4713/8818 |
| 0.212    | 22489/106098 | 22493/106208 | 1900/9066 |
| 0.1818   | 17541/96508  | 17942/106200 | 514/8406  |
| 0.1785   | 17215/96446  | 17443/106202 | 1524/8292 |
| 0.07041  | 7473/106132  | 7475/106210  | 285/9050  |
| 0.004632 | 439/94766    | 454/105176   | 12/8422   |
| 0.007533 | 766/101692   | 776/106150   | 27/8142   |
| 0.3886   | 38815/99890  | 39599/105710 | 5226/8254 |
| 0.4404   | 19154/43492  | 34140/103762 | 2016/4564 |
| 0.312    | 32567/104384 | 32766/106200 | 1517/8490 |
| 0.4373   | 15919/36404  | 34152/99992  | 2116/2826 |
| 0.5437   | 57679/106094 | 57729/106210 | 3515/9058 |
| 0.04328  | 780/18022    | 826/20430    | 474/1826  |
| 0.3782   | 10370/27422  | 22128/102954 | 659/2838  |
| 0.6156   | 45539/73976  | 58574/101606 | 4352/4750 |
| 0.316    | 14454/45740  | 22015/102226 | 349/3496  |
| 0.08725  | 8628/98884   | 8996/106054  | 176/8862  |

VEP annotated somatic variants

|             |              |              |           |
|-------------|--------------|--------------|-----------|
| 0.02377     | 1687/70975   | 2466/106090  | 25/6541   |
| 0.000009644 | 1/103688     | 1/106210     | 0/9028    |
| 0.5678      | 60290/106180 | 60290/106210 | 3464/9066 |
| 0.08665     | 9132/105384  | 9154/106210  | 2701/9046 |
| 0.1645      | 2047/12442   | 2572/18104   | 184/266   |
| 0.2153      | 22853/106130 | 22861/106210 | 2362/9064 |
| 0.09429     | 9969/105730  | 9996/106208  | 200/9044  |
| 0.6349      | 39258/61829  | 62953/105530 | 4976/6042 |
| 0.05292     | 5617/106146  | 5624/106210  | 317/9064  |
| 0.1218      | 12718/104392 | 12753/106198 | 146/8292  |
| 0.5364      | 29885/55716  | 50033/104162 | 4232/5254 |
| 0.4281      | 45428/106124 | 45446/106210 | 6515/9066 |
| 0.545       | 56002/102752 | 57177/106124 | 5613/8972 |
| 0.1714      | 10284/59988  | 13140/104574 | 963/4550  |
| 0.298       | 31609/106054 | 31643/106210 | 3177/9048 |
| 0.1827      | 18473/101092 | 18732/105320 | 230/7276  |
| 0.4016      | 42567/105998 | 42584/106210 | 6494/9060 |
| 0.3876      | 41094/106012 | 41156/106200 | 5263/8980 |
| 0.5765      | 59983/104052 | 60470/105802 | 6607/8386 |
| 0.5576      | 59204/106176 | 59205/106210 | 6451/9064 |
| 0.2765      | 193/698      | 1610/26380   | 10/126    |
| 0.2849      | 21639/75964  | 30360/106206 | 433/7438  |
| 0.007877    | 833/105752   | 833/106208   | 12/9004   |
| 0.3935      | 41775/106176 | 41781/106210 | 7318/9066 |
| 0.3017      | 31658/104936 | 31800/105628 | 947/8444  |
| 0.7527      | 79855/106098 | 79899/106210 | 7627/9064 |
| 0.2821      | 27957/99086  | 29059/106032 | 5445/8762 |
| 0.4385      | 30161/68784  | 41257/105710 | 5076/6704 |

VEP annotated somatic variants

| ExAC_AC_AN_AMR | ExAC_AC_AN_EAS | ExAC_AC_AN_FIN | ExAC_AC_AN_NFE |
|----------------|----------------|----------------|----------------|
| 605/11212      | 2/7864         | 330/6614       | 2081/54022     |
| 6473/11210     | 2326/7852      | 4172/6604      | 36176/54326    |
| 5424/10038     | 1751/6508      | 3351/5898      | 28651/45268    |
| 7071/11124     | 2379/7770      | 4208/6570      | 38305/54044    |
| 0/11212        | 0/7846         | 0/6608         | 3/54344        |
| 4312/11144     | 686/7846       | 987/6432       | 13835/54170    |
| 22/154         | 27/468         | 4/306          | 49/4478        |
| 3120/11142     | 1168/7812      | 1237/6340      | 11633/54200    |
| 8907/11144     | 6789/7810      | 5104/6470      | 46277/53594    |
| 100/1798       | 0/1190         | 55/890         | 1031/13024     |
| 0/408          | 0/544          | 0/174          | 0/5584         |
| 147/10914      | 304/7582       | 309/6546       | 2080/53300     |
| 7377/11204     | 4083/7836      | 4204/6612      | 34595/54322    |
| 2377/11028     | 241/7732       | 2390/6378      | 22291/53018    |
| 889/11096      | 41/7844        | 1076/6232      | 10772/53824    |
| 1022/3204      | 906/4170       | 817/2016       | 10503/27578    |
| 6870/10872     | 3375/7678      | 3393/6388      | 25984/53110    |
| 0/324          | 0/472          | 0/1692         | 4/5960         |
| 8896/11146     | 7089/7830      | 3724/6572      | 30762/52672    |
| 122/10690      | 623/7328       | 38/6454        | 680/52554      |
| 2335/7446      | 1592/5022      | 627/4740       | 7044/35654     |
| 4/142          | 4/142          | 0/2            | 126/2614       |
| 1679/11206     | 714/7854       | 1044/6600      | 9996/54026     |
| 7981/11204     | 4554/7850      | 3511/6612      | 32835/54248    |
| 134/8932       | 0/6014         | 135/4525       | 1975/38406     |
| 57/164         | 61/146         | 500/1452       | 2155/4598      |
| 6215/11168     | 5528/7858      | 3796/6608      | 25862/54282    |
| 3720/11198     | 3386/7822      | 1004/6606      | 6172/54304     |
| 2501/7934      | 1749/5526      | 1638/4392      | 14672/41072    |
| 33/11210       | 0/7860         | 72/6592        | 1315/54288     |
| 2044/11202     | 809/7862       | 1713/6606      | 13669/54336    |
| 3178/9374      | 1239/5850      | 2465/6138      | 19819/45928    |
| 8914/11024     | 7372/7732      | 5238/6552      | 37623/53232    |

VEP annotated somatic variants

|            |           |           |             |
|------------|-----------|-----------|-------------|
| 1705/11106 | 20/7766   | 1701/6550 | 17613/52446 |
| 2952/11084 | 4134/7768 | 1206/6468 | 8655/53606  |
| 314/11204  | 974/7856  | 451/6614  | 4584/54296  |
| 8752/11212 | 5344/7860 | 4953/6614 | 40891/54338 |
| 390/1142   | 355/1094  | 448/1390  | 2225/5380   |
| 3313/11068 | 475/7782  | 2155/6498 | 15312/53834 |
| 2509/10280 | 1656/6476 | 1311/6236 | 9850/46426  |
| 2313/10880 | 3874/7652 | 1439/6496 | 7189/51504  |
| 2695/11090 | 1748/7792 | 1496/6554 | 10738/51384 |
| 7911/10794 | 7604/7678 | 5955/6554 | 43347/52726 |
| 398/1362   | 1827/3118 | 323/2442  | 1559/12654  |
| 487/11138  | 0/7838    | 1480/6584 | 6924/54112  |
| 593/11130  | 213/7792  | 356/6596  | 3263/54070  |
| 0/11190    | 0/7806    | 0/6604    | 1/54124     |
| 2147/9248  | 426/7366  | 2118/6494 | 18419/52868 |
| 2199/9186  | 436/7398  | 2120/6420 | 18583/52496 |
| 1242/11206 | 10/7858   | 507/6614  | 1782/54138  |
| 490/11216  | 489/7866  | 675/6614  | 3960/54326  |
| 2171/11016 | 924/7812  | 2039/6578 | 16725/53548 |
| 3459/9013  | 757/6017  | 496/4529  | 4299/38161  |
| 114/6053   | 0/3853    | 268/1649  | 2509/21559  |
| 5917/11216 | 3324/7852 | 1882/6614 | 15752/54310 |
| 2475/11216 | 5572/7862 | 1422/6608 | 9195/54322  |
| 313/11194  | 0/7864    | 486/6606  | 4134/54288  |
| 73/119     | 45/111    | 938/1318  | 2240/3028   |
| 64/105     | 44/109    | 894/1279  | 2121/2857   |
| 47/94      | 43/107    | 1/2       | 1385/1995   |
| 1049/11180 | 3/7852    | 1178/6610 | 12302/53336 |
| 696/5074   | 835/4336  | 924/3584  | 7500/34458  |
| 314/11192  | 1/7830    | 500/6598  | 4102/53362  |
| 2015/9596  | 647/6898  | 1154/4564 | 14022/46892 |
| 212/11178  | 0/7834    | 539/6610  | 2722/53498  |



VEP annotated somatic variants

|                                                                                                            |                                                                                                    |                                                                                                     |                                                                                                                      |
|------------------------------------------------------------------------------------------------------------|----------------------------------------------------------------------------------------------------|-----------------------------------------------------------------------------------------------------|----------------------------------------------------------------------------------------------------------------------|
| 1350/3350<br>5704/10882                                                                                    | 717/2804<br>4815/7712                                                                              | 1570/2472<br>3241/6484                                                                              | 12117/20524<br>18817/51528                                                                                           |
| 6729/8144                                                                                                  | 6165/6284                                                                                          | 3548/5642                                                                                           | 23822/41086                                                                                                          |
| 2645/10172<br>280/11172                                                                                    | 168/6942<br>0/7832                                                                                 | 865/6136<br>253/6612                                                                                | 7177/44838<br>2615/54278                                                                                             |
| 140/10236<br>1531/11206<br>4122/11208<br>761/11214                                                         | 1/7338<br>424/7864<br>5536/7848<br>607/7844                                                        | 149/4834<br>1071/6602<br>2837/6614<br>293/6614                                                      | 1487/49710<br>6401/54340<br>18030/54342<br>4430/54342                                                                |
| 1472/9024                                                                                                  | 1650/6023                                                                                          | 1106/4529                                                                                           | 8748/38434                                                                                                           |
| 2993/10430<br>2429/11202<br>1490/11212<br>7419/7652<br>5488/8970<br>2936/11144<br>2107/10550<br>9010/11214 | 753/7120<br>2430/7838<br>2515/7828<br>4932/4934<br>3077/6008<br>362/7824<br>1521/7474<br>3827/7808 | 2091/6420<br>2778/6606<br>885/6614<br>3501/3709<br>1993/4502<br>2511/6596<br>2182/6302<br>5522/6614 | 15341/51620<br>25393/54226<br>12926/54174<br>27727/30418<br>14282/38070<br>17588/54112<br>19985/51262<br>42107/54324 |
| 5547/11186<br>669/10986                                                                                    | 5133/7856<br>425/7774                                                                              | 1888/6604<br>603/6146                                                                               | 18501/54260<br>7276/53326                                                                                            |
| 2839/8953                                                                                                  | 7/5990                                                                                             | 1066/4516                                                                                           | 6666/36975                                                                                                           |
| 83/1720                                                                                                    | 0/1249                                                                                             | 102/562                                                                                             | 1068/7747                                                                                                            |
| 3/10190                                                                                                    | 0/6896                                                                                             | 10/6368                                                                                             | 457/50218                                                                                                            |
| 515/9612<br>1737/11174<br>2/202<br>13/62                                                                   | 1/6696<br>235/7838<br>8/194<br>19/52                                                               | 1311/6198<br>1412/6602<br>0/34<br>2/12                                                              | 7840/47724<br>18636/54122<br>71/1930<br>54/256                                                                       |
| 601/11158                                                                                                  | 1281/7824                                                                                          | 593/6560                                                                                            | 6548/54222                                                                                                           |
| 4517/5426<br>2397/11038                                                                                    | 4012/5146<br>1754/7666                                                                             | 1543/1938<br>2143/6522                                                                              | 23971/32686<br>15960/52204                                                                                           |

VEP annotated somatic variants

|                                                                   |                                                              |                                                              |                                                                       |
|-------------------------------------------------------------------|--------------------------------------------------------------|--------------------------------------------------------------|-----------------------------------------------------------------------|
| 111/304                                                           | 126/324                                                      | 821/1690                                                     | 1775/5442                                                             |
| 422/11200<br>62/150<br>937/11182                                  | 1/7866<br>30/134<br>604/7826                                 | 258/6614<br>436/1614<br>643/6602                             | 3543/54336<br>1548/3368<br>7963/54020                                 |
| 5641/11184<br>4951/10798<br>4322/11070<br>1415/9018<br>3285/11206 | 5756/7846<br>7552/7668<br>3790/7812<br>680/6021<br>3166/7840 | 2080/6610<br>3281/6376<br>2084/6428<br>1026/4525<br>702/6612 | 16791/54244<br>25098/50622<br>12802/53914<br>8584/38157<br>4673/54340 |
| 2374/11092<br>5312/11056                                          | 1918/7840<br>4430/7702                                       | 1143/6572<br>1086/6610                                       | 6594/53094<br>9198/49966                                              |
| 8039/9798                                                         | 5960/7112                                                    | 3282/5708                                                    | 29563/48734                                                           |
| 689/10526<br>1394/11206<br>51/144                                 | 273/7184<br>1830/7858<br>53/140                              | 287/6436<br>1021/6612<br>78/246                              | 4890/49852<br>10944/54332<br>862/2686                                 |
| 2992/10928<br>35/1436<br>5/11206                                  | 2921/7740<br>0/1580<br>1/7862                                | 1406/6460<br>40/1404<br>29/6612                              | 12349/52554<br>432/11532<br>226/54328                                 |
| 1445/11208                                                        | 5186/7828                                                    | 958/6612                                                     | 10061/54342                                                           |
| 780/11150                                                         | 490/7826                                                     | 988/6586                                                     | 5926/54178                                                            |
| 4/330                                                             | 0/590                                                        | 1/238                                                        | 62/3608                                                               |
| 1639/10722<br>972/11188                                           | 149/7538<br>4/7842                                           | 1151/6436<br>888/6614                                        | 8788/51444<br>7050/53392                                              |
| 5/11054<br>1538/10888<br>2796/11198                               | 0/7714<br>1112/7684<br>3647/7814                             | 450/6404<br>1424/5676<br>2503/6608                           | 290/51062<br>14504/50834<br>18170/53662                               |
| 472/10878<br>79/10986<br>4362/10932<br>5615/11064                 | 10/7826<br>1/7810<br>777/7490<br>4195/7804                   | 729/6504<br>194/6116<br>3573/6502<br>2148/6502               | 6804/53666<br>970/53584<br>27081/52800<br>14332/53990                 |

VEP annotated somatic variants

|            |           |           |             |
|------------|-----------|-----------|-------------|
| 2450/11210 | 1559/7838 | 2104/6614 | 16483/54314 |
| 3/11114    | 0/7828    | 8/6608    | 160/54082   |
| 1/11048    | 0/7850    | 2/6598    | 142/54216   |
| 795/9124   | 1/5280    | 835/5194  | 7656/39410  |
| 951/11198  | 364/7840  | 1435/6612 | 12216/54256 |
| 720/11170  | 1606/7788 | 1528/6608 | 8162/53900  |
| 796/5302   | 0/4126    | 885/4992  | 5753/31190  |
| 5706/11192 | 3111/7830 | 1972/6598 | 18753/54270 |
| 2662/11208 | 340/7842  | 2179/6606 | 17449/54284 |
| 7643/11142 | 3969/7824 | 3940/6594 | 32974/54094 |
| 3242/11202 | 3509/7836 | 997/6608  | 7768/53876  |
| 52/1062    | 0/1400    | 17/390    | 521/8560    |
| 4107/11206 | 2405/7840 | 2919/6614 | 22813/54326 |
| 9453/11214 | 7693/7866 | 4594/6612 | 34971/54316 |
| 0/10942    | 0/7604    | 0/6574    | 0/50918     |
| 190/11164  | 1/7836    | 125/6478  | 1468/53574  |
| 1180/11212 | 1206/7860 | 1115/6612 | 11040/54332 |
| 8/176      | 0/180     | 0/14      | 85/3472     |
| 37/176     | 92/322    | 12/38     | 369/3080    |
| 1205/2684  | 1325/2594 | 409/1030  | 6975/18572  |
| 2923/11212 | 3853/7822 | 769/6614  | 6513/54200  |
| 46/152     | 43/174    | 10/34     | 962/2796    |
| 1832/4809  | 1425/3666 | 703/2540  | 5768/16042  |
| 470/11214  | 3/7864    | 337/6614  | 4511/54342  |
| 9509/11172 | 6503/7830 | 4799/6588 | 36865/53950 |
| 9039/11208 | 7484/7858 | 4175/6612 | 29578/54320 |
| 9337/11012 | 7384/7764 | 3646/6532 | 33085/53758 |
| 1273/11122 | 149/7782  | 2317/6598 | 13316/54262 |
| 837/11174  | 1106/7752 | 1494/6580 | 10155/53734 |
| 1148/1998  | 918/1664  | 321/634   | 7386/12818  |

VEP annotated somatic variants

|             |           |           |             |
|-------------|-----------|-----------|-------------|
| 612/11204   | 20/7866   | 777/6610  | 6613/54320  |
| 869/11164   | 747/7816  | 541/6614  | 3967/52192  |
| 3123/9680   | 2665/6910 | 3232/5966 | 27676/49390 |
| 2197/10372  | 3806/7696 | 2508/6042 | 16887/51690 |
| 5382/7298   | 2393/4806 | 2580/3105 | 27155/30456 |
| 87/11216    | 1/7866    | 534/6614  | 2498/54222  |
| 897/9222    | 658/6658  | 829/5412  | 9244/44652  |
| 3363/8989   | 1491/6009 | 1033/4517 | 8910/38363  |
| 1476/10732  | 3401/7520 | 699/6282  | 5301/51962  |
| 10551/11208 | 6796/7830 | 6112/6612 | 49338/54264 |
| 3473/11192  | 4631/7856 | 1726/6608 | 17003/54344 |
| 1477/11216  | 523/7866  | 2013/6614 | 14744/54332 |
| 2955/11180  | 2531/7742 | 2611/6592 | 21811/54048 |
| 4115/11160  | 2542/7784 | 1722/6598 | 9554/54154  |
| 73/11170    | 0/7850    | 75/6574   | 695/53166   |
| 5151/11032  | 4567/7798 | 2235/6404 | 22566/53836 |
| 2665/10450  | 2266/6138 | 1624/5628 | 11552/44140 |
| 4202/11068  | 1825/7778 | 2542/6580 | 21696/53830 |
| 5714/8882   | 3594/5878 | 688/4490  | 7721/36910  |
| 8752/11204  | 5256/7844 | 3368/6584 | 28382/54272 |
| 2140/11132  | 2519/7778 | 1995/6518 | 21351/54028 |
| 1084/11138  | 79/7744   | 711/6586  | 9500/53800  |
| 493/11134   | 3/7856    | 448/6584  | 3774/54224  |
| 49/134      | 49/138    | 3/4       | 804/2160    |
| 44/11204    | 1/7864    | 2/6612    | 354/54160   |
| 647/11208   | 1377/7852 | 972/6608  | 6213/54292  |
| 38/11178    | 0/7862    | 23/6608   | 650/54302   |
| 22/48       | 70/96     | 0/0       | 390/632     |
| 3007/9000   | 4159/6014 | 3211/4520 | 23175/38216 |

VEP annotated somatic variants

|            |           |           |             |
|------------|-----------|-----------|-------------|
| 4126/9950  | 2017/7290 | 3033/5776 | 26975/48442 |
| 3599/11082 | 3056/7744 | 2922/6606 | 24713/51902 |
| 30/128     | 18/134    | 5/14      | 561/2344    |
| 4299/11184 | 4222/7836 | 2098/6612 | 15629/53772 |
| 3232/11134 | 2415/7828 | 1887/6588 | 15111/54126 |
| 286/11200  | 160/7826  | 333/6596  | 2271/54222  |
| 35/90      | 51/128    | 0/0       | 1089/2696   |
| 29/11214   | 0/7862    | 73/6610   | 693/54218   |
| 0/11158    | 0/7810    | 0/6614    | 1/52672     |
| 3540/9614  | 3960/6902 | 4409/6252 | 35730/50044 |
| 3777/11212 | 4273/7844 | 4558/6614 | 38006/54336 |
| 1182/11200 | 7/7866    | 968/6614  | 12054/54334 |
| 2200/11204 | 136/7860  | 1807/6614 | 13351/54260 |
| 3986/9512  | 3428/6000 | 2802/6108 | 21805/43902 |
| 3412/11206 | 3460/7836 | 1656/6598 | 13831/54326 |
| 6591/10780 | 4503/7508 | 4345/6468 | 36228/52216 |
| 1099/11188 | 1159/7844 | 622/6594  | 8822/54274  |
| 1815/11170 | 297/7860  | 2684/6608 | 23617/54324 |
| 970/11202  | 397/7864  | 455/6614  | 7914/54220  |
| 1413/11196 | 1688/7832 | 2287/6606 | 16793/54232 |
| 380/568    | 630/774   | 675/1528  | 2782/6384   |
| 653/11188  | 0/7866    | 849/6612  | 8012/54220  |
| 6575/11126 | 3843/7772 | 1424/6592 | 15149/54180 |
| 0/498      | 0/772     | 0/2052    | 9/7362      |
| 4518/9498  | 2598/6842 | 2851/5040 | 28678/49312 |
| 2807/11132 | 3804/7826 | 2548/6054 | 17075/53334 |
| 23/90      | 33/128    | 1/2       | 779/2702    |
| 2560/11160 | 2493/7844 | 1817/6612 | 13597/53616 |
| 0/10820    | 0/7490    | 0/6532    | 6/52574     |
| 89/172     | 79/262    | 696/1195  | 1384/2752   |
| 22/11188   | 0/7830    | 10/6576   | 286/53924   |

VEP annotated somatic variants

|            |           |           |             |
|------------|-----------|-----------|-------------|
| 288/892    | 301/1350  | 455/2508  | 1383/8746   |
| 140/292    | 136/322   | 21/34     | 2464/4422   |
| 102/250    | 134/300   | 14/34     | 1294/3368   |
| 7/292      | 6/318     | 116/1624  | 232/4756    |
| 2180/11130 | 1563/7796 | 2129/6594 | 17862/52750 |
| 170/10870  | 43/7756   | 576/6026  | 4028/52004  |
| 65/7186    | 13/5634   | 281/5658  | 1384/39858  |
| 765/11212  | 1172/7842 | 172/6614  | 969/54338   |
| 4280/9206  | 2376/6820 | 1588/4780 | 11770/47018 |
| 8680/10976 | 7136/7800 | 4202/6498 | 35913/53622 |
| 978/11150  | 99/7838   | 812/6606  | 10259/53708 |
| 211/11206  | 533/7862  | 234/6614  | 2666/54320  |
| 2233/8963  | 1561/5938 | 1853/4509 | 13538/37035 |
| 1885/8096  | 1404/5239 | 1627/3961 | 12118/32652 |
| 2488/11112 | 1800/7814 | 1838/6544 | 11337/53330 |
| 6981/11214 | 6964/7862 | 4662/6614 | 39969/54314 |
| 670/11014  | 1006/7722 | 919/6554  | 8417/53530  |
| 192/9896   | 1/6664    | 80/5842   | 1811/48814  |
| 64/10476   | 0/6536    | 192/6162  | 876/47372   |
| 3377/11186 | 2021/7858 | 1419/6612 | 12745/53182 |
| 2911/5058  | 2131/4632 | 1448/3872 | 9950/31428  |
| 2055/6860  | 204/4620  | 784/3986  | 8611/37336  |
| 554/11198  | 3/7858    | 584/6612  | 6119/54086  |
| 200/11214  | 0/7866    | 515/6612  | 4267/54342  |
| 1417/3134  | 1132/3600 | 965/1870  | 13845/28022 |
| 703/11066  | 5/7728    | 556/6576  | 6794/53222  |
| 6077/11180 | 4337/7832 | 3536/6604 | 25313/54282 |
| 2156/11142 | 3352/7752 | 1705/6574 | 15015/53836 |

VEP annotated somatic variants

|            |           |           |             |
|------------|-----------|-----------|-------------|
| 1960/11216 | 79/7856   | 1678/6612 | 13022/54334 |
| 903/1396   | 1594/2752 | 1079/1732 | 8383/12860  |
| 5531/8959  | 2476/5978 | 3068/4490 | 25785/38100 |
| 3190/8927  | 712/6003  | 1167/4432 | 10011/36711 |
| 8201/11204 | 2756/7844 | 2735/6612 | 23630/54332 |
| 6342/11172 | 2682/7810 | 2562/6596 | 20331/54066 |
| 8005/11210 | 2724/7838 | 2647/6612 | 20930/54322 |
| 6354/11214 | 5659/7846 | 1701/6614 | 19431/54328 |
| 7295/11176 | 4293/7814 | 4255/6568 | 33456/54188 |
| 6201/10632 | 4082/7514 | 3495/6332 | 25616/51566 |
| 6193/10616 | 4070/7484 | 3493/6312 | 25557/51366 |
| 2108/7562  | 347/4940  | 363/3510  | 2588/34594  |
| 54/11196   | 1/7854    | 143/6604  | 996/54298   |
| 509/11038  | 157/7688  | 506/6280  | 3880/51442  |
| 901/11214  | 982/7862  | 1042/6612 | 10654/54328 |
| 496/11196  | 8/7866    | 537/6614  | 5094/54288  |
| 6804/11206 | 4580/7830 | 3117/6610 | 24322/54316 |
| 341/10988  | 422/7846  | 876/6544  | 5051/53926  |
| 3416/10766 | 2252/7664 | 3871/6062 | 30487/53400 |
| 26/142     | 37/190    | 21/32     | 695/3278    |
| 286/492    | 183/400   | 118/220   | 2233/5162   |
| 190/11214  | 1/7866    | 128/6614  | 1473/54346  |
| 4085/11216 | 1491/7858 | 2697/6610 | 20423/54346 |
| 562/9074   | 6/6180    | 1303/6020 | 6625/43010  |
| 1671/8896  | 302/6007  | 728/4506  | 6205/38061  |
| 1344/8886  | 300/5989  | 613/4485  | 5202/38020  |
| 4213/8875  | 1993/5930 | 803/4486  | 9968/37371  |
| 4161/11206 | 1039/7846 | 905/6612  | 10297/54280 |
| 6307/11200 | 2416/7842 | 820/6614  | 9047/53526  |
| 2209/9388  | 3538/6754 | 2866/6026 | 26131/49624 |
| 4050/11214 | 3839/7852 | 1594/6612 | 15211/54334 |
| 5176/8683  | 3401/5731 | 2944/4233 | 27779/36734 |
| 60/184     | 59/234    | 119/244   | 1352/3112   |
| 1437/11146 | 71/7804   | 929/6568  | 8293/54106  |
| 49/11212   | 0/7844    | 182/6612  | 834/54268   |
| 1743/11114 | 252/7824  | 900/6570  | 5584/54060  |

VEP annotated somatic variants

|             |           |           |             |
|-------------|-----------|-----------|-------------|
| 185/290     | 286/326   | 531/760   | 2819/4672   |
| 231/502     | 140/828   | 105/288   | 2401/7034   |
| 10152/11196 | 6254/7850 | 5441/6592 | 45559/54278 |
| 126/302     | 228/322   | 677/1630  | 1641/5194   |
| 191/11130   | 0/7820    | 65/6606   | 1760/54296  |
| 9260/11216  | 5390/7850 | 4601/6608 | 36869/54336 |
| 9264/11206  | 5391/7850 | 4590/6600 | 36841/54254 |
| 3598/11120  | 4394/7840 | 2764/6602 | 24973/54118 |
| 1249/11212  | 3199/7850 | 1767/6614 | 10129/54202 |
| 732/7700    | 15/5562   | 847/3884  | 9643/42172  |
| 696/7496    | 311/6094  | 813/3688  | 9804/44702  |
| 0/4754      | 1/3918    | 1/2744    | 31/28764    |
| 743/10578   | 2/7630    | 966/5930  | 5839/52504  |
| 1849/11212  | 1831/7832 | 2068/6614 | 14476/54318 |
| 5092/11026  | 3318/7728 | 2606/6580 | 16520/53078 |
| 6861/11206  | 5991/7844 | 2174/6612 | 22046/54274 |
| 4784/11012  | 3472/7754 | 2163/6442 | 16014/53192 |
| 5296/11148  | 6370/7848 | 4096/6612 | 37791/54292 |
| 5643/11208  | 2374/7858 | 1832/6614 | 17386/54340 |
| 143/10726   | 2/7332    | 23/6426   | 942/51494   |
| 1991/11194  | 644/7842  | 278/6596  | 3352/54284  |
| 2609/11204  | 5104/7850 | 1366/6612 | 11259/54272 |
| 30/9009     | 1/6010    | 278/4465  | 792/38368   |
| 3340/11168  | 1602/7852 | 288/6614  | 2944/54320  |
| 164/390     | 321/808   | 63/140    | 2930/5956   |
| 7632/11180  | 4619/7820 | 4859/6610 | 39843/54270 |
| 7387/10814  | 1817/7552 | 4818/6428 | 39381/51804 |
| 2501/11212  | 1854/7840 | 1031/6614 | 12559/54344 |
| 8077/11086  | 5462/7774 | 5217/6584 | 41630/54030 |



VEP annotated somatic variants

|            |           |           |             |
|------------|-----------|-----------|-------------|
| 5258/10268 | 2425/7006 | 2845/6298 | 20222/48948 |
| 2274/11210 | 5/7846    | 1997/6614 | 17842/54330 |
| 5209/11134 | 2065/7716 | 2738/6606 | 20149/54184 |
| 123/292    | 9/152     | 604/1786  | 2095/6128   |
| 62/11204   | 0/7844    | 12/6610   | 545/54082   |
| 5796/9770  | 4885/7162 | 2821/5688 | 18928/49188 |
| 3560/11064 | 2366/7816 | 2755/6536 | 22734/52676 |
| 254/440    | 637/1016  | 185/302   | 4566/7824   |
| 2728/10874 | 2275/7706 | 2707/6236 | 20789/51662 |
| 7621/11042 | 5948/7832 | 3485/6588 | 28521/54210 |
| 139/11170  | 0/7864    | 171/6442  | 1543/53954  |
| 2375/9422  | 1766/6870 | 2179/5650 | 20027/49664 |
| 1896/11214 | 1690/7844 | 1846/6612 | 13085/54296 |
| 4838/11210 | 2965/7856 | 2368/6614 | 19672/54334 |
| 4989/11214 | 2979/7848 | 2605/6606 | 22422/54336 |
| 231/11216  | 314/7866  | 460/6614  | 1252/54346  |
| 190/11216  | 2/7866    | 460/6614  | 1250/54338  |
| 2096/11202 | 1983/7822 | 1285/6614 | 9516/53958  |
| 2097/11212 | 2046/7858 | 1285/6612 | 9540/54314  |
| 36/216     | 24/150    | 5/14      | 677/4374    |
| 577/11214  | 124/7860  | 1017/6612 | 8064/54328  |
| 3177/11200 | 4134/7844 | 2012/6610 | 15791/54328 |
| 556/11014  | 58/7776   | 392/6514  | 3785/51790  |
| 2474/11204 | 1058/7842 | 2486/6606 | 16928/54284 |
| 70/318     | 118/282   | 15/72     | 403/3584    |
| 1542/10242 | 2105/7324 | 327/5262  | 2203/48068  |
| 147/660    | 13/674    | 54/266    | 661/5878    |
| 61/7796    | 0/5636    | 6/5778    | 346/36878   |
| 4391/11212 | 36/7866   | 2807/6614 | 25531/54346 |
| 1536/11216 | 1319/7864 | 779/6614  | 7184/54338  |
| 2511/11208 | 1456/7846 | 2067/6602 | 19146/54284 |
| 4546/9974  | 4592/7272 | 2075/5018 | 24443/48608 |
| 8889/8961  | 5991/5991 | 3984/4325 | 36121/37826 |
| 545/9018   | 0/6016    | 501/4528  | 5225/38187  |
| 1653/9290  | 2207/6910 | 655/5870  | 5172/45536  |
| 4103/11190 | 2898/7794 | 1751/6602 | 14612/54188 |
| 1450/11202 | 624/7850  | 1507/6606 | 11985/53604 |
| 957/10850  | 46/7716   | 176/6472  | 4739/53462  |
| 2808/10870 | 1461/7666 | 1274/6096 | 15870/52406 |

VEP annotated somatic variants

|            |           |           |             |
|------------|-----------|-----------|-------------|
| 2251/11190 | 2087/7814 | 1214/6614 | 7254/53586  |
| 773/11214  | 2144/7846 | 503/6612  | 4821/54346  |
| 4118/11186 | 4468/7842 | 3418/6610 | 29578/54252 |
| 1130/8539  | 2060/5656 | 2100/4006 | 18002/35564 |
| 3810/6960  | 3683/5176 | 2168/3898 | 17250/35178 |
| 4883/11190 | 4757/7818 | 2009/6568 | 13219/54270 |
| 4269/10814 | 3899/7650 | 1109/5794 | 7689/52368  |
| 255/1134   | 392/1168  | 34/298    | 627/7560    |
| 3157/11206 | 1370/7822 | 1898/6612 | 17433/54334 |
| 9/54       | 15/116    | 0/0       | 335/1448    |
| 9068/11178 | 6427/7840 | 4258/6612 | 33866/53236 |
| 24/148     | 0/248     | 364/998   | 658/2314    |
| 3218/11206 | 1235/7856 | 2863/6612 | 15452/54330 |
| 206/7154   | 2/5922    | 84/4296   | 1556/37962  |
| 1980/11148 | 1184/7804 | 1802/6508 | 17405/53378 |
| 1/72       | 0/60      | 1/6       | 20/422      |
| 546/6648   | 3/4550    | 638/3926  | 6363/32046  |
| 8013/10658 | 4064/7480 | 4448/6536 | 31197/51700 |
| 3117/11162 | 3141/7834 | 2761/6584 | 18225/54244 |
| 9517/11024 | 7463/7812 | 4859/6440 | 38266/52448 |
| 302/11206  | 0/7844    | 324/6610  | 3323/54176  |
| 4258/6419  | 2763/4278 | 1824/3159 | 17583/27044 |
| 203/10278  | 3/7484    | 71/6230   | 1965/50968  |
| 1313/11190 | 1093/7858 | 92/6614   | 2547/53810  |
| 1306/11190 | 1086/7842 | 91/6606   | 2558/54286  |
| 4302/11186 | 2661/7822 | 3384/6558 | 25528/54252 |
| 224/510    | 770/938   | 47/96     | 3149/6366   |
| 765/11202  | 587/7848  | 890/6602  | 6969/54192  |
| 1064/11214 | 268/7866  | 682/6614  | 7251/54344  |
| 16/11214   | 0/7864    | 1/6614    | 152/54340   |
| 78/11212   | 197/7864  | 74/6614   | 1062/54244  |
| 1959/6022  | 1072/3910 | 1908/4110 | 15250/33984 |
| 6434/11206 | 4286/7850 | 3725/6612 | 33495/54328 |

VEP annotated somatic variants

|            |           |           |             |
|------------|-----------|-----------|-------------|
| 5250/11210 | 5772/7858 | 2629/6608 | 21219/54204 |
| 4704/11164 | 296/7858  | 1409/6610 | 6431/52220  |
| 3594/11202 | 2606/7810 | 2529/6614 | 25442/54276 |
| 57/296     | 58/342    | 12/34     | 1572/4918   |
| 6426/11214 | 4220/7848 | 3964/6610 | 35252/54334 |
| 4203/10050 | 1755/7440 | 1188/5976 | 11390/51402 |
| 288/4872   | 65/3594   | 200/2280  | 1657/24572  |
| 620/10972  | 1383/7588 | 744/6468  | 6911/52380  |
| 681/8720   | 1084/7004 | 667/4802  | 5517/46820  |
| 2260/11160 | 3055/7772 | 1743/6600 | 14537/53820 |
| 4578/8889  | 3136/5943 | 2579/4464 | 20585/37987 |
| 0/8929     | 0/5977    | 0/4432    | 15/37270    |
| 2696/11104 | 1314/7742 | 1899/6614 | 14416/51924 |
| 70/216     | 137/290   | 375/1606  | 1053/3096   |
| 9742/11214 | 5136/7846 | 5174/6614 | 41731/54324 |
| 5464/11212 | 4568/7864 | 2577/6612 | 18330/54332 |
| 4117/11202 | 3214/7850 | 1556/6612 | 12392/54302 |
| 3676/8948  | 4158/5980 | 2288/4484 | 17139/38134 |
| 2560/9029  | 9/6034    | 1606/4530 | 13327/38460 |
| 3512/11214 | 1080/7862 | 470/6614  | 7814/54342  |
| 4095/10818 | 1631/7738 | 469/6504  | 8030/52508  |
| 378/11210  | 0/7844    | 380/6614  | 3659/54166  |
| 4616/11196 | 3509/7838 | 2624/6612 | 24163/54334 |
| 7346/11208 | 7197/7864 | 2375/6610 | 18312/54266 |
| 6/11216    | 0/7866    | 19/6612   | 317/54338   |
| 1813/9394  | 283/6966  | 857/4526  | 11381/48546 |
| 2815/11138 | 1923/7834 | 2083/6562 | 14168/54158 |
| 2810/11168 | 1882/7850 | 2089/6606 | 14338/54290 |
| 217/8434   | 1/6394    | 147/4310  | 2908/45060  |
| 3467/11200 | 3219/7846 | 1961/6588 | 16770/54290 |
| 78/11134   | 0/7792    | 137/6524  | 803/53902   |

VEP annotated somatic variants

|            |           |           |             |
|------------|-----------|-----------|-------------|
| 6203/11206 | 3498/7826 | 3892/6614 | 34953/54338 |
| 2882/11138 | 2113/7806 | 633/6600  | 6776/54224  |
| 2411/11172 | 1873/7856 | 1717/6612 | 11737/54342 |
| 5483/11204 | 2475/7854 | 1686/6612 | 12705/54330 |
| 6500/8464  | 5896/5896 | 3935/4382 | 32496/36286 |
| 21/11186   | 0/7812    | 182/6604  | 567/54200   |
| 9/11066    | 0/7854    | 145/6460  | 1144/53782  |
| 474/11118  | 4/7770    | 1441/6586 | 7640/51698  |
| 4548/10946 | 4312/7568 | 3972/6538 | 28266/53464 |
| 9261/10478 | 7179/7598 | 4629/6064 | 36904/50770 |
| 700/11184  | 473/7830  | 515/6602  | 6437/54034  |
| 2376/10250 | 2368/7142 | 1655/5830 | 13831/48530 |
| 2349/11174 | 2364/7838 | 1682/6608 | 13929/53902 |
| 2396/7794  | 1295/4616 | 2208/5506 | 13292/32802 |
| 2304/11198 | 1003/7854 | 2253/6600 | 18806/54262 |
| 3557/11200 | 1294/7844 | 3222/6612 | 23393/54334 |
| 7928/11200 | 6286/7852 | 2485/6608 | 19736/54308 |
| 4258/10814 | 2681/7690 | 2220/6178 | 19317/52578 |
| 2829/5652  | 846/4838  | 675/4616  | 6255/29032  |
| 72/242     | 4/274     | 12/30     | 970/3588    |
| 322/11180  | 2/7860    | 406/6552  | 4673/53952  |
| 178/11182  | 81/7846   | 200/6614  | 1904/53360  |
| 10/10828   | 0/7634    | 20/6174   | 149/51602   |
| 375/8707   | 2282/5794 | 696/4278  | 4479/36562  |
| 2949/11028 | 1984/7700 | 2315/6562 | 23343/53858 |
| 2570/11214 | 2007/7836 | 1706/6614 | 18865/54340 |
| 2553/11102 | 2002/7800 | 1692/6568 | 18703/53962 |
| 68/11134   | 1536/7810 | 20/6606   | 445/53680   |
| 2784/11180 | 3013/7816 | 873/6606  | 4418/52940  |
| 2/11096    | 0/7726    | 0/6542    | 45/52378    |
| 155/9790   | 0/5610    | 57/5364   | 1419/35732  |
| 2994/11208 | 5878/7848 | 545/6602  | 6678/54338  |
| 506/10634  | 238/7046  | 424/6174  | 5138/48250  |
| 3903/11136 | 3839/7830 | 2756/6594 | 19558/53974 |

VEP annotated somatic variants

|                                                    |                                               |                                                 |                                                         |
|----------------------------------------------------|-----------------------------------------------|-------------------------------------------------|---------------------------------------------------------|
| 3413/11214<br>3/10752                              | 1413/7848<br>2/7428                           | 1823/6612<br>2/6480                             | 10490/54340<br>23/51826                                 |
| 83/150<br>6648/11206<br>199/346                    | 124/176<br>6585/7840<br>226/324               | 18/26<br>5250/6612<br>1146/1744                 | 1017/1456<br>39948/54264<br>3786/6078                   |
| 1382/10134                                         | 2835/7098                                     | 1212/5926                                       | 12960/48200                                             |
| 8682/11190<br>8360/11058<br>8682/11184<br>90/11138 | 5564/7802<br>5110/7752<br>4966/7818<br>0/7818 | 5148/6594<br>4568/6434<br>4959/6516<br>369/6598 | 39994/53936<br>36005/53132<br>38915/53578<br>1529/54116 |
| 10190/11212<br>7612/11010                          | 7764/7844<br>4780/7604                        | 4281/6612<br>3929/6550                          | 38695/54304<br>29721/53386                              |
| 3002/6922<br>7877/11210                            | 2839/5890<br>6289/7858                        | 1662/3356<br>2486/6610                          | 13134/35628<br>19756/54344                              |
| 6351/10676<br>4208/10680                           | 2379/7548<br>1611/7538                        | 4683/6066<br>1604/6178                          | 37796/52420<br>13255/51144                              |
| 17/54                                              | 32/84                                         | 6/18                                            | 334/1080                                                |
| 2559/10644                                         | 2020/7222                                     | 1062/6372                                       | 11847/50006                                             |
| 5532/7732<br>1/89<br>1637/9986<br>1579/11168       | 4425/5373<br>0/107<br>1753/6580<br>4/7786     | 1461/2679<br>0/2<br>793/4444<br>1328/6600       | 14061/28904<br>28/1873<br>10209/44820<br>14566/53986    |
| 5606/10904<br>409/9938<br>1/11214                  | 3991/7586<br>316/7118<br>0/7866               | 4164/6498<br>237/4902<br>0/6612                 | 31390/53570<br>3688/46394<br>31/54326                   |
| 6921/11202                                         | 3311/7858                                     | 1663/6602                                       | 17000/54186                                             |
| 3298/11166<br>75/11174                             | 5657/7822<br>0/7844                           | 2256/6596<br>127/6598                           | 18422/54066<br>1723/53810                               |
| 1381/11208<br>132/7604                             | 589/7866<br>0/5896                            | 211/6614<br>44/5442                             | 2344/54324<br>1181/41246                                |

VEP annotated somatic variants

|            |           |           |             |
|------------|-----------|-----------|-------------|
| 154/170    | 102/152   | 1307/1590 | 3005/3540   |
| 5747/11042 | 737/7704  | 3513/6570 | 24944/50068 |
| 1780/9102  | 7/5900    | 147/4712  | 1602/42336  |
| 8902/11208 | 7052/7862 | 5166/6608 | 39048/54184 |
| 2448/9030  | 4063/6009 | 2149/4530 | 16283/38470 |
| 1138/8815  | 686/5844  | 997/4409  | 6841/35785  |
| 6838/9015  | 5279/6030 | 2923/4521 | 26572/38416 |
| 9/46       | 4/52      | 1/4       | 89/259      |
| 2032/11186 | 1385/7810 | 3462/6606 | 24632/53396 |
| 3635/11110 | 1951/7784 | 2094/6580 | 17553/54168 |
| 5606/11188 | 5063/7838 | 2693/6596 | 25311/54270 |
| 7992/8737  | 5119/5750 | 4248/4430 | 33575/36969 |
| 83/10092   | 0/7518    | 30/5320   | 653/51516   |
| 4054/11196 | 4972/7840 | 2346/6604 | 14251/54320 |
| 4619/9412  | 2362/6126 | 1500/4326 | 12523/41074 |
| 4756/9746  | 5390/7004 | 1539/5342 | 12830/42050 |
| 1689/11112 | 728/7764  | 350/6598  | 1708/54180  |
| 5893/10970 | 2218/7778 | 2770/6494 | 22795/53850 |
| 1453/10592 | 1020/7510 | 882/6214  | 10372/51984 |
| 1/9033     | 6/6034    | 2/4529    | 20/38441    |
| 6914/11110 | 5320/7798 | 3404/6406 | 33639/53980 |
| 5/11210    | 0/7866    | 0/6612    | 21/54336    |
| 3/5586     | 0/4716    | 0/2326    | 67/31358    |
| 2713/11086 | 821/7792  | 777/6586  | 3396/53486  |
| 643/3820   | 13/4214   | 1353/3948 | 9664/30748  |
| 571/10776  | 0/7482    | 1086/6144 | 6895/52998  |
| 1605/11208 | 2794/7834 | 2034/6608 | 14284/54264 |
| 1284/11214 | 2982/7834 | 1470/6610 | 9591/54320  |
| 2657/11214 | 758/7860  | 729/6612  | 7030/54246  |
| 176/322    | 180/338   | 582/1522  | 1754/4472   |
| 6631/11174 | 3991/7820 | 2399/6600 | 19166/53228 |

VEP annotated somatic variants

| 6/126       | 2/46      | 13/30     | 211/1918    |
|-------------|-----------|-----------|-------------|
| 5934/11108  | 3644/7808 | 2275/6586 | 19529/53704 |
| 3542/10522  | 299/7444  | 983/6310  | 13372/52270 |
| 4078/11192  | 1291/7842 | 2916/6604 | 19248/54102 |
| 9/214       | 0/150     | 68/850    | 304/4484    |
| 5/10664     | 0/7630    | 6/5914    | 320/52410   |
| 7336/9019   | 5654/6028 | 1821/4522 | 16094/38436 |
| 39/90       | 72/128    | 4/6       | 1015/2688   |
| 8193/11098  | 5292/7778 | 4731/6596 | 39089/54194 |
| 1263/2010   | 1143/1890 | 1123/1996 | 5487/10260  |
| 4972/11206  | 3092/7822 | 2558/6614 | 18578/54344 |
| 10075/11214 | 7844/7846 | 5603/6614 | 42728/54340 |
| 6557/10820  | 2733/7538 | 2315/5768 | 16005/51714 |
| 3819/11190  | 4863/7858 | 2677/6604 | 19558/54168 |
| 64/11118    | 0/7824    | 32/6454   | 1308/53752  |
| 1262/6182   | 132/4306  | 1934/5078 | 14744/39032 |
| 1230/11196  | 463/7856  | 1497/6602 | 12761/54212 |
| 5053/11212  | 3527/7854 | 2967/6614 | 21858/54342 |
| 7722/11212  | 6367/7860 | 4324/6614 | 33295/54328 |
| 5010/10942  | 3372/7588 | 2959/6574 | 21997/53552 |
| 6992/10950  | 4187/7638 | 4085/6410 | 31531/53426 |
| 2670/11156  | 2919/7770 | 1692/6596 | 14015/54128 |
| 2679/11102  | 171/7800  | 1862/6584 | 18076/54196 |
| 19/206      | 61/300    | 345/1610  | 599/3220    |
| 7371/11200  | 7775/7834 | 3652/6612 | 27388/54324 |
| 6039/8936   | 4583/5991 | 2763/4419 | 21868/37388 |
| 109/222     | 83/228    | 139/178   | 2311/3700   |
| 3129/5214   | 2544/4004 | 1719/2764 | 22802/31074 |
| 2888/11216  | 2410/7858 | 1751/6614 | 14511/54344 |
| 1287/11154  | 2/7838    | 1886/6614 | 15956/54298 |
| 608/11216   | 1/7862    | 694/6614  | 8529/54342  |
| 1729/10340  | 578/7166  | 1580/5576 | 17851/49098 |
| 0/10084     | 0/7122    | 0/5324    | 1/49852     |
| 4811/11202  | 329/7862  | 4177/6602 | 41151/54328 |
| 6739/10634  | 4143/7332 | 3308/6116 | 27328/49606 |
| 50/11182    | 1/7836    | 9/6608    | 398/54230   |

VEP annotated somatic variants

|            |           |           |             |
|------------|-----------|-----------|-------------|
| 2755/11206 | 679/7840  | 860/6578  | 5638/54222  |
| 198/11186  | 1/7856    | 157/6548  | 2547/54184  |
| 6755/11184 | 2466/7810 | 3618/6608 | 28273/54236 |
| 6236/11190 | 6760/7864 | 2512/6604 | 23990/54282 |
| 2796/5930  | 2390/5418 | 2349/5142 | 15439/36360 |
| 3455/11082 | 2904/7764 | 2604/6582 | 17177/52072 |
| 3304/8818  | 2857/7056 | 2563/6052 | 17029/44260 |
| 3466/10842 | 2918/7804 | 2594/6542 | 17630/53136 |
| 175/11102  | 520/7838  | 405/6258  | 4518/53612  |
| 15/11170   | 0/7830    | 142/6600  | 647/53516   |
| 63/11208   | 0/7864    | 61/6612   | 993/53988   |
| 2009/11194 | 1889/7836 | 3010/6600 | 22091/54146 |
| 3771/10754 | 1067/7196 | 3673/6458 | 27757/51146 |
| 3012/11210 | 2597/7858 | 742/6614  | 7639/54346  |
| 8954/10448 | 3084/7222 | 5592/6496 | 42822/52018 |
| 296/808    | 933/1450  | 110/278   | 2060/7528   |
| 7283/11210 | 5342/7844 | 1816/6610 | 21451/54310 |
| 3431/10232 | 1945/7232 | 860/6264  | 15183/50352 |
| 17/11188   | 2/7616    | 47/6610   | 137/54052   |
| 66/11198   | 3/7864    | 40/6612   | 862/53950   |
| 8628/11188 | 3832/7800 | 3622/6602 | 35565/53778 |
| 700/6194   | 89/5138   | 353/3738  | 3751/35802  |
| 114/286    | 118/322   | 475/1602  | 1629/4712   |
| 4858/8820  | 5384/7280 | 2963/5632 | 24444/45630 |
| 0/100      | 0/126     | 0/2       | 4/1130      |
| 76/4342    | 0/3812    | 24/1478   | 451/20294   |
| 2/259      | 0/407     | 0/157     | 139/4580    |
| 5752/10078 | 2247/5330 | 3335/5948 | 19260/39874 |
| 3952/11210 | 3928/7834 | 637/6614  | 8095/54198  |
| 87/2374    | 0/3058    | 123/3484  | 1488/23524  |
| 92/11202   | 4/7864    | 118/6612  | 1295/54116  |
| 4738/10878 | 2572/7592 | 1609/6388 | 16729/53018 |
| 2630/11190 | 73/7866   | 579/6612  | 6044/54298  |
| 71/5928    | 0/5372    | 133/4232  | 1555/35104  |
| 9334/11214 | 7057/7866 | 4679/6610 | 37260/54294 |
| 19/244     | 0/134     | 3/40      | 161/1318    |
| 829/11198  | 19/7862   | 1284/6576 | 11022/54266 |
| 356/6100   | 727/5266  | 151/2642  | 3026/36372  |
| 4831/11190 | 2518/7860 | 1515/6612 | 12180/54334 |



VEP annotated somatic variants

|            |           |           |             |
|------------|-----------|-----------|-------------|
| 446/11194  | 136/7860  | 229/6614  | 2778/54326  |
| 6358/11208 | 5165/7854 | 3727/6614 | 37098/54306 |
| 211/11146  | 0/7850    | 175/6554  | 1867/54282  |
| 14/90      | 18/128    | 0/0       | 454/2676    |
| 668/11214  | 19/7866   | 1255/6612 | 10162/54328 |
| 90/358     | 58/358    | 65/1684   | 267/6174    |
| 1826/11016 | 1870/7664 | 1509/6332 | 11840/52612 |
| 7844/11200 | 6287/7852 | 2484/6608 | 19665/54232 |
| 1594/11196 | 2712/7846 | 826/6596  | 8354/54092  |
| 4846/11208 | 6625/7860 | 3778/6614 | 21145/54320 |
| 7089/8992  | 5094/6006 | 3009/4517 | 26223/37787 |
| 2010/6970  | 2606/5346 | 892/2974  | 6394/32814  |
| 79/10860   | 0/7710    | 72/6146   | 1290/52600  |
| 4523/9740  | 2522/7116 | 1244/4294 | 10474/47174 |
| 6826/11206 | 7359/7862 | 4117/6612 | 29824/54328 |
| 302/11170  | 0/7830    | 400/6612  | 3324/54332  |
| 267/10900  | 0/7590    | 410/6552  | 3349/52688  |
| 185/5452   | 0/3198    | 346/4512  | 2266/25932  |
| 3918/11112 | 1101/7864 | 1479/6612 | 15123/54240 |
| 2872/11116 | 1687/7766 | 2043/6608 | 16625/54266 |
| 7051/11180 | 3546/7828 | 5162/6606 | 42733/54312 |
| 119/11090  | 0/7778    | 511/6590  | 1386/54242  |
| 688/10070  | 657/6550  | 1195/6294 | 8720/49026  |
| 912/11152  | 815/7794  | 651/6612  | 8048/52508  |
| 1260/11024 | 848/7654  | 1007/6506 | 9556/50540  |
| 451/10544  | 12/7046   | 261/6386  | 4406/50538  |
| 2543/11216 | 910/7862  | 1485/6614 | 14264/54340 |
| 1360/8910  | 3045/5945 | 395/4363  | 5599/38059  |
| 2406/11212 | 868/7844  | 1102/6612 | 9831/54340  |
| 293/9734   | 0/6338    | 423/6110  | 3632/44006  |
| 3339/5778  | 1730/4027 | 964/2677  | 8167/22364  |
| 148/11182  | 1/7842    | 46/6550   | 780/53734   |
| 1167/3346  | 891/2446  | 485/1142  | 4655/13434  |
| 2505/11186 | 2926/7796 | 2326/6604 | 20120/54182 |

VEP annotated somatic variants

|            |           |           |             |
|------------|-----------|-----------|-------------|
| 983/11078  | 1247/7818 | 1341/6218 | 8948/53516  |
| 580/11066  | 1234/7792 | 706/6596  | 7390/54090  |
| 43/11212   | 0/7866    | 109/6614  | 970/54330   |
| 2549/11194 | 2850/7830 | 769/6614  | 3562/54328  |
| 2548/11040 | 500/7658  | 1600/6552 | 12499/53004 |
| 0/10928    | 0/7720    | 0/6558    | 1/53034     |
| 8083/11200 | 6419/7860 | 2483/6602 | 20191/54228 |
| 20/11190   | 0/7864    | 36/6614   | 702/54168   |
| 4699/10404 | 3457/7376 | 3054/5928 | 24503/50740 |
| 2589/10864 | 2040/7576 | 2020/6164 | 15658/53002 |
| 1097/11174 | 867/7822  | 693/6586  | 10076/54072 |
| 2513/11022 | 895/7794  | 1500/6152 | 22096/53268 |
| 2580/11164 | 916/7836  | 1567/6496 | 22718/53820 |
| 1487/2170  | 828/1710  | 710/1898  | 6011/16172  |
| 6169/11052 | 3104/7650 | 2161/6520 | 15890/52464 |
| 77/194     | 7/288     | 18/34     | 963/1968    |
| 3098/11190 | 1587/7810 | 1823/6604 | 15443/54258 |
| 1674/11206 | 3026/7812 | 820/6614  | 5993/54326  |
| 2015/11206 | 2706/7834 | 955/6608  | 6907/54344  |
| 1013/3324  | 1068/3728 | 600/1518  | 9045/24600  |
| 3008/10938 | 2231/7678 | 1319/6046 | 10819/52692 |
| 2912/11188 | 1674/7852 | 3194/6614 | 25422/54336 |
| 3771/11194 | 3166/7846 | 2595/6606 | 21193/54088 |
| 3193/11210 | 212/7846  | 987/6614  | 11661/54344 |
| 1781/11144 | 2413/7818 | 1424/6610 | 15587/53152 |
| 1134/11110 | 18/7772   | 1573/6602 | 12868/54238 |
| 452/11216  | 1393/7862 | 832/6614  | 2906/54346  |
| 2731/11114 | 5/7818    | 1563/6532 | 17586/53966 |
| 1609/3334  | 1327/2948 | 581/1118  | 9536/20136  |
| 2886/11144 | 4282/7806 | 2612/6592 | 21585/53260 |
| 4393/8931  | 581/5978  | 741/4474  | 6137/37932  |
| 4214/7050  | 1702/4914 | 2428/4386 | 19301/37522 |
| 482/10988  | 1503/7748 | 1179/6486 | 6826/52260  |
| 598/11202  | 1425/7790 | 206/6606  | 5472/54302  |
| 3855/11208 | 4326/7840 | 2197/6614 | 23389/54338 |

VEP annotated somatic variants

|            |           |           |             |
|------------|-----------|-----------|-------------|
| 1402/10974 | 1403/7336 | 1222/6560 | 13324/53108 |
| 1716/11212 | 1803/7798 | 1286/6614 | 15128/54338 |
| 6948/11000 | 6274/7750 | 3722/5948 | 32943/52964 |
| 2984/11194 | 1181/7810 | 2722/6606 | 22988/54310 |
| 2508/11210 | 1232/7840 | 2651/6614 | 21392/54332 |
| 44/118     | 25/130    | 1/2       | 1137/2224   |
| 2580/11166 | 1167/7772 | 2702/6578 | 22450/53922 |
| 2831/10346 | 1129/6930 | 2580/6038 | 21085/48484 |
| 2944/11170 | 1187/7826 | 2679/6558 | 22369/52576 |
| 999/4702   | 1013/3856 | 1578/3586 | 8941/28322  |
| 3075/4974  | 1878/4050 | 2086/3294 | 16052/28298 |
| 48/108     | 63/160    | 4/6       | 1211/2742   |
| 35/120     | 70/108    | 15/190    | 387/2186    |
| 1448/11148 | 2511/7778 | 1848/6542 | 14797/53924 |
| 1837/11214 | 619/7864  | 2020/6610 | 15463/54228 |
| 2340/11162 | 3281/7824 | 2354/6604 | 17728/53032 |
| 18/104     | 1/132     | 0/0       | 876/2958    |
| 165/474    | 141/434   | 56/126    | 977/2292    |
| 1421/3440  | 687/1608  | 430/1764  | 2636/10304  |
| 659/8082   | 418/6316  | 1012/5522 | 7417/40690  |
| 1436/11166 | 340/7810  | 1082/6610 | 6553/54302  |
| 1290/11192 | 1855/7834 | 1338/6612 | 6731/54316  |
| 6019/10686 | 3082/7436 | 3395/6106 | 31778/52468 |
| 1975/7612  | 2499/5952 | 2044/3604 | 21870/38878 |
| 4632/11186 | 3326/7824 | 2192/6608 | 20571/54276 |
| 2966/9828  | 3420/7200 | 1664/5868 | 13810/47308 |
| 1566/10670 | 216/7512  | 1438/6472 | 10665/52688 |
| 4659/8939  | 4506/5991 | 2597/4465 | 22716/38046 |
| 5436/10806 | 3688/7594 | 2904/6522 | 20799/53328 |
| 6210/8735  | 4424/5894 | 2252/4197 | 20938/35910 |
| 6262/8932  | 4435/5977 | 2309/4456 | 21654/37733 |
| 6259/8925  | 4436/5976 | 2310/4452 | 21650/37707 |
| 97/314     | 230/682   | 17/62     | 1752/5776   |
| 6386/11054 | 3598/7744 | 3299/6570 | 21570/53912 |
| 1906/11110 | 2001/7750 | 2671/6578 | 23904/52450 |
| 2830/11160 | 1559/7810 | 1896/6614 | 14995/52600 |
| 1241/2046  | 963/1852  | 890/1348  | 8857/14978  |
| 123/772    | 7/2178    | 95/464    | 800/10278   |
| 44/130     | 85/184    | 63/222    | 105/358     |

VEP annotated somatic variants

|            |           |           |             |
|------------|-----------|-----------|-------------|
| 2316/11172 | 18/7816   | 546/6612  | 5643/53140  |
| 2531/10954 | 7/6700    | 465/6580  | 3164/53904  |
| 1325/10958 | 735/7756  | 988/6528  | 11824/52766 |
| 2292/8818  | 2149/6620 | 2241/4456 | 21351/44728 |
| 516/10054  | 1098/7244 | 737/6166  | 5191/49950  |
| 6759/11038 | 5715/7796 | 2956/6534 | 30390/53750 |
| 1612/11200 | 6/7866    | 1628/6604 | 18334/54292 |
| 14/11178   | 292/7814  | 45/6596   | 414/53574   |
| 26/11216   | 292/7860  | 44/6612   | 429/54346   |
| 14/9618    | 287/6898  | 41/5338   | 408/47392   |
| 1611/3210  | 2322/4064 | 731/1616  | 13912/28558 |
| 2919/4644  | 3245/4970 | 922/1988  | 9154/22884  |
| 3024/11210 | 1401/7848 | 810/6600  | 8613/54144  |
| 2551/11110 | 1352/7808 | 1483/6452 | 14184/53894 |
| 8703/8934  | 5994/5996 | 4177/4425 | 34528/37697 |
| 6542/11198 | 4704/7826 | 2191/6596 | 19422/54302 |
| 2116/11072 | 601/7468  | 1875/6530 | 19061/52620 |
| 1331/11126 | 446/7808  | 961/6374  | 11049/53230 |
| 5515/11184 | 433/7848  | 2418/6610 | 19493/54276 |
| 1967/2162  | 3208/3298 | 735/840   | 13694/16164 |
| 1732/10674 | 2140/7260 | 1581/6194 | 15092/51656 |
| 1126/1684  | 1942/2994 | 467/694   | 13782/18520 |
| 1/528      | 0/298     | 1/126     | 32/4520     |
| 0/8126     | 0/5663    | 0/3484    | 6/33761     |
| 3314/11158 | 2007/7794 | 2743/6592 | 28211/53996 |
| 2364/11210 | 1915/7846 | 2340/6612 | 21613/54316 |
| 884/11158  | 0/7862    | 970/6580  | 9742/54100  |
| 1585/11184 | 341/7846  | 1754/6614 | 9092/53204  |
| 7508/11180 | 5817/7840 | 3844/6584 | 30716/54230 |
| 5741/11198 | 4721/7854 | 2982/6600 | 29713/54242 |
| 2968/11160 | 1983/7822 | 1808/6540 | 17856/53772 |
| 4582/11204 | 3540/7848 | 4197/6604 | 30983/54316 |
| 5128/11092 | 4741/7776 | 3136/6384 | 23581/52190 |
| 8248/11174 | 7171/7850 | 4603/6612 | 35856/53694 |
| 830/1036   | 669/678   | 147/178   | 6263/7720   |

VEP annotated somatic variants

|                                                                                                                        |                                                                                                            |                                                                                                             |                                                                                                                                 |
|------------------------------------------------------------------------------------------------------------------------|------------------------------------------------------------------------------------------------------------|-------------------------------------------------------------------------------------------------------------|---------------------------------------------------------------------------------------------------------------------------------|
| 1130/2098                                                                                                              | 596/2566                                                                                                   | 1193/3448                                                                                                   | 6172/17482                                                                                                                      |
| 2767/5552<br>6529/11204                                                                                                | 1116/4464<br>3335/7832                                                                                     | 2281/4628<br>3598/6600                                                                                      | 17123/32650<br>28799/54046                                                                                                      |
| 6347/11198<br>52/8356                                                                                                  | 4750/7852<br>0/6504                                                                                        | 2950/6610<br>129/5636                                                                                       | 21636/54338<br>390/48026                                                                                                        |
| 6965/10438                                                                                                             | 6068/7256                                                                                                  | 2627/6350                                                                                                   | 21041/50642                                                                                                                     |
| 2051/11214<br>26/90<br>3774/10484                                                                                      | 2178/7862<br>22/128<br>2051/7452                                                                           | 2208/6610<br>0/0<br>1243/6024                                                                               | 20247/54286<br>900/2654<br>10974/50916                                                                                          |
| 4092/11072<br>4579/8778                                                                                                | 813/7804<br>45/5954                                                                                        | 2836/6472<br>3298/4443                                                                                      | 27073/54068<br>29020/37663                                                                                                      |
| 173/532<br>1624/4596<br>9066/11110<br>9217/11212<br>3754/11100<br>1122/11214<br>10206/11216<br>6381/10558<br>526/10984 | 82/356<br>772/2736<br>6247/7796<br>6274/7862<br>679/7792<br>159/7862<br>7779/7866<br>5736/7602<br>406/7766 | 99/246<br>607/1440<br>4635/6580<br>4655/6612<br>1433/6606<br>801/6614<br>5897/6614<br>1806/5804<br>581/6280 | 1350/3378<br>10504/25556<br>33127/53800<br>34059/54318<br>12652/52148<br>9837/54186<br>43881/54344<br>19374/50544<br>4769/53672 |
| 6395/11192<br>3603/11200<br>1955/10902<br>20/11182<br>0/5978<br>8519/10834                                             | 5072/7856<br>3471/7850<br>2402/7684<br>0/7842<br>0/4240<br>4952/7692                                       | 4274/6606<br>2714/6608<br>765/6502<br>4/6550<br>0/2362<br>3576/6480                                         | 35266/54106<br>19519/54336<br>6926/52816<br>139/53738<br>1/29020<br>30276/52904                                                 |
| 6082/11198<br>2925/10878                                                                                               | 3548/7808<br>22/7450                                                                                       | 3394/6606<br>3706/6468                                                                                      | 29382/54320<br>28741/52858                                                                                                      |
| 4773/11210                                                                                                             | 5638/7856                                                                                                  | 1911/6610                                                                                                   | 13043/54324                                                                                                                     |
| 114/286                                                                                                                | 70/316                                                                                                     | 307/756                                                                                                     | 1923/4316                                                                                                                       |
| 4417/11054<br>266/296                                                                                                  | 2741/7678<br>223/324                                                                                       | 2504/6550<br>1442/1634                                                                                      | 19668/53518<br>4568/5030                                                                                                        |
| 326/376                                                                                                                | 412/430                                                                                                    | 1523/1702                                                                                                   | 5471/6212                                                                                                                       |

VEP annotated somatic variants

|            |           |           |             |
|------------|-----------|-----------|-------------|
| 4561/4996  | 3392/3588 | 3829/4298 | 22426/25504 |
| 3/4902     | 0/4194    | 7/3094    | 50/29030    |
| 1/372      | 0/476     | 37/1468   | 35/5102     |
| 48/186     | 75/306    | 429/1618  | 822/3054    |
| 2267/11214 | 1376/7858 | 889/6614  | 6888/54342  |
| 4264/10588 | 2214/7292 | 1849/6386 | 16014/51256 |
| 1844/11170 | 1187/7832 | 1553/6610 | 11933/54274 |
| 1852/11180 | 1186/7834 | 1556/6608 | 11935/54090 |
| 503/11208  | 0/7864    | 314/6550  | 2620/54232  |
| 530/11126  | 100/7776  | 513/6594  | 5783/53938  |
| 6313/11148 | 5548/7836 | 3477/6592 | 30143/54152 |
| 6172/11114 | 5420/7806 | 3457/6592 | 29157/52930 |
| 665/10508  | 0/7768    | 590/5718  | 6499/49850  |
| 12/10530   | 0/7446    | 15/6132   | 221/50648   |
| 2792/11104 | 2731/7730 | 2878/6564 | 17273/53550 |
| 137/374    | 317/402   | 72/138    | 1745/3738   |
| 37/486     | 1/746     | 37/438    | 573/5068    |
| 2944/11080 | 1466/7770 | 1197/6592 | 11447/52856 |
| 1690/11192 | 1039/7828 | 1623/6602 | 11842/53724 |
| 4650/11192 | 643/7856  | 260/6612  | 4950/54318  |
| 7903/11106 | 4678/7772 | 4530/6518 | 31375/53754 |
| 58/222     | 16/312    | 100/204   | 1060/2982   |
| 447/11208  | 4/7858    | 648/6614  | 7057/54046  |
| 0/112      | 0/144     | 0/8       | 1/2842      |
| 1021/11158 | 5/7824    | 1019/6614 | 10405/52926 |
| 868/10898  | 1251/7346 | 1664/6260 | 10250/49532 |
| 492/1282   | 1461/1507 | 272/447   | 3936/8457   |
| 1343/10940 | 832/7644  | 1085/6000 | 8940/52068  |
| 1182/6388  | 805/5156  | 988/4006  | 8447/36850  |
| 1321/3208  | 2078/3196 | 873/1592  | 10713/24136 |
| 9179/11214 | 7727/7866 | 4923/6606 | 40161/54318 |
| 138/11152  | 171/7840  | 24/6604   | 837/54118   |

VEP annotated somatic variants

|            |           |           |             |
|------------|-----------|-----------|-------------|
| 5335/11148 | 1064/7742 | 2422/6600 | 23406/53836 |
| 9271/11210 | 3976/7854 | 4905/6610 | 41693/54198 |
| 345/3246   | 469/3198  | 516/3130  | 2499/21624  |
| 1676/11176 | 3537/7814 | 1763/6582 | 13123/54200 |
| 1354/11166 | 67/7850   | 1751/6596 | 13169/54094 |
| 2340/11210 | 2667/7844 | 951/6614  | 11971/54244 |
| 1738/11146 | 1139/7798 | 770/6532  | 3792/52730  |
| 7158/10960 | 3564/7628 | 3478/6550 | 26874/53558 |
| 1098/11216 | 1046/7858 | 294/6614  | 3749/54318  |
| 5024/6985  | 4085/4819 | 1133/2265 | 12765/24332 |
| 4316/11210 | 2993/7838 | 1782/6614 | 13566/54346 |
| 93/11192   | 43/7858   | 1/6614    | 152/54180   |
| 2295/3606  | 1080/2324 | 1240/2564 | 10391/21758 |
| 4839/11188 | 3379/7850 | 3806/6610 | 30611/54336 |
| 430/11202  | 2171/7846 | 250/6614  | 3034/53808  |
| 1512/9029  | 1202/6017 | 425/4530  | 4962/38488  |
| 196/10868  | 1/7778    | 452/5510  | 2031/53152  |
| 1737/6776  | 947/5112  | 218/3230  | 2289/33144  |
| 69/11202   | 1/7866    | 9/6530    | 532/54292   |
| 1354/10880 | 2007/7694 | 771/5650  | 7655/52522  |
| 3712/10336 | 3154/7478 | 1637/5756 | 15375/50446 |
| 2093/4072  | 1774/3262 | 714/1440  | 10463/23414 |
| 134/10690  | 0/7504    | 120/5918  | 1198/49952  |
| 9367/11126 | 6912/7832 | 5151/6374 | 40746/52252 |
| 3886/11172 | 3151/7834 | 1875/6582 | 15663/54152 |
| 1293/11212 | 6/7862    | 1159/6614 | 14204/54234 |

VEP annotated somatic variants

|            |           |           |             |
|------------|-----------|-----------|-------------|
| 2195/11078 | 2819/7840 | 1014/6590 | 8996/53460  |
| 3125/4782  | 2216/3156 | 1584/2062 | 16861/24708 |
| 2212/4740  | 1095/3736 | 756/1146  | 17367/28176 |
| 0/164      | 0/128     | 0/22      | 5/2230      |
| 4697/11204 | 3059/7836 | 1102/6608 | 9826/54172  |
| 8653/11172 | 6308/7830 | 4532/6584 | 32777/54140 |
| 1401/11162 | 725/7824  | 1823/6568 | 16502/54108 |
| 7088/11212 | 5617/7856 | 3524/6612 | 26748/54346 |
| 4887/10902 | 3532/7716 | 3143/6522 | 20501/53470 |
| 1440/11048 | 1387/7732 | 836/6402  | 9381/53418  |
| 558/1080   | 1771/2350 | 347/566   | 4912/9300   |
| 1867/11100 | 368/7782  | 261/6554  | 3675/53696  |
| 167/11048  | 0/7674    | 308/6592  | 2276/53222  |
| 386/11188  | 3/7864    | 698/6602  | 5629/54304  |
| 2806/11100 | 275/7778  | 920/6598  | 7947/54034  |
| 4576/11172 | 3487/7816 | 1726/6610 | 14207/54248 |
| 3854/11210 | 4080/7858 | 780/6612  | 5897/54342  |
| 2290/11200 | 1293/7858 | 1715/6610 | 13234/54302 |
| 100/11214  | 2/7866    | 231/6614  | 1502/54322  |
| 23/92      | 9/132     | 1/2       | 1188/2760   |
| 2282/11034 | 426/7646  | 2927/6488 | 24398/52930 |
| 4633/11146 | 7730/7860 | 2917/6598 | 22807/54138 |
| 35/9436    | 0/6528    | 147/5086  | 549/46014   |
| 1858/10532 | 1427/7360 | 1227/6138 | 14908/51206 |
| 2907/11216 | 588/7862  | 2092/6614 | 20797/54254 |
| 1027/11146 | 547/7822  | 616/6314  | 5417/54050  |
| 507/6279   | 0/3886    | 803/3614  | 5595/28045  |
| 86/282     | 111/318   | 707/1614  | 1933/5122   |
| 4719/11150 | 2764/7808 | 2524/6578 | 16489/54142 |
| 86/11106   | 0/7786    | 311/6604  | 1937/52298  |
| 3657/11198 | 2330/7856 | 2529/6612 | 20516/54242 |
| 8805/11214 | 6693/7856 | 3563/6612 | 26400/54318 |
| 11/9028    | 0/6032    | 1/4530    | 218/38461   |
| 2580/11192 | 1531/7830 | 1478/6596 | 10202/54300 |



VEP annotated somatic variants

|            |           |           |             |
|------------|-----------|-----------|-------------|
| 7062/8978  | 3835/5944 | 3199/4483 | 25729/38069 |
| 3591/11074 | 3272/7788 | 1585/6456 | 17809/53916 |
| 1239/11064 | 771/7636  | 1071/6586 | 12499/51804 |
| 4109/11122 | 3903/7808 | 2269/6604 | 22363/54242 |
| 31/11194   | 0/7862    | 40/6612   | 1004/53610  |
| 3936/11188 | 3319/7836 | 2338/6604 | 13191/54278 |
| 5/11124    | 0/7832    | 4/6604    | 155/52246   |
| 4330/10678 | 1985/7458 | 2595/6352 | 24289/52636 |
| 1087/11150 | 3431/7776 | 286/6612  | 2613/54316  |
| 914/11206  | 771/7858  | 914/6614  | 7273/54322  |
| 72/5052    | 1/4804    | 65/3388   | 927/32976   |
| 68/11194   | 0/7858    | 293/6610  | 1915/54246  |
| 5506/11208 | 1950/7850 | 3134/6608 | 28176/54296 |
| 3094/11170 | 1228/7830 | 1423/6612 | 11032/54028 |
| 2749/8154  | 3484/5294 | 1349/3428 | 10287/28900 |
| 5/11040    | 0/7844    | 5/6550    | 197/53406   |
| 2880/11168 | 4502/7846 | 1545/6602 | 10746/54140 |
| 6460/11178 | 6675/7858 | 4257/6598 | 34586/54104 |
| 4767/11200 | 2088/7862 | 2720/6614 | 22052/54342 |
| 3846/11212 | 1943/7838 | 2219/6614 | 15365/54344 |
| 2660/11118 | 2835/7690 | 1670/6612 | 13228/51250 |
| 2572/11144 | 2846/7772 | 1738/6582 | 13706/54136 |
| 3499/11212 | 3325/7844 | 1348/6610 | 16541/54326 |
| 3512/11208 | 3327/7854 | 1348/6612 | 16581/54340 |
| 1051/11110 | 9/7752    | 817/6590  | 10095/53660 |
| 2958/11210 | 42/7866   | 1653/6614 | 14136/54296 |
| 8241/11194 | 5180/7838 | 3293/6580 | 31869/54294 |
| 2006/10124 | 1804/7410 | 1583/6130 | 14028/49010 |
| 410/11216  | 663/7858  | 365/6614  | 4495/54342  |
| 2526/9872  | 3435/6386 | 1267/6046 | 10360/45058 |
| 404/10892  | 0/7716    | 202/6102  | 2133/50794  |
| 78/11200   | 0/7852    | 116/6602  | 764/53914   |
| 6270/11190 | 5057/7836 | 5145/6612 | 39892/54262 |

VEP annotated somatic variants

|                                                               |                                                            |                                                           |                                                                     |
|---------------------------------------------------------------|------------------------------------------------------------|-----------------------------------------------------------|---------------------------------------------------------------------|
| 3896/8264<br>0/132<br>36/7586<br>686/8730                     | 552/5922<br>0/138<br>0/5546<br>166/5855                    | 1598/4798<br>0/0<br>26/2864<br>648/4385                   | 16724/46442<br>1/2066<br>397/29706<br>7570/36818                    |
| 480/4188<br>3925/7162                                         | 1/3782<br>2355/4898                                        | 361/1462<br>2354/5684                                     | 5122/23338<br>15188/35264                                           |
| 918/11212<br>713/7192                                         | 684/7864<br>558/5752                                       | 677/6614<br>656/4840                                      | 7449/54344<br>6366/38044                                            |
| 413/5405                                                      | 0/2134                                                     | 547/2453                                                  | 4495/18567                                                          |
| 1421/11148<br>1740/11052<br>933/2440                          | 1197/7838<br>2728/7748<br>1233/2844                        | 1082/6590<br>1582/6362<br>297/676                         | 9539/52716<br>10866/52628<br>6425/15244                             |
| 0/292<br>68/156<br>23/38                                      | 0/322<br>64/226<br>4/10                                    | 24/1624<br>432/1178<br>4/6                                | 6/5012<br>685/2216<br>85/184                                        |
| 133/222<br>7229/11186<br>2768/9900<br>16/286                  | 93/314<br>2168/7806<br>4/7204<br>20/322                    | 914/1628<br>2966/6590<br>1579/5582<br>175/766             | 1424/3212<br>21507/54148<br>15708/51062<br>537/4780                 |
| 4648/11194                                                    | 3037/7816                                                  | 4059/6602                                                 | 31668/54232                                                         |
| 0/626                                                         | 0/892                                                      | 0/166                                                     | 6/5198                                                              |
| 5119/11200<br>0/9940<br>951/11212<br>3814/11044<br>2771/11036 | 3519/7850<br>0/7218<br>1379/7842<br>1196/7802<br>5503/7804 | 2064/6606<br>0/5628<br>908/6612<br>1469/6564<br>2676/6534 | 18646/54322<br>1/50784<br>11069/54292<br>13407/53650<br>12381/53560 |
| 9777/11210                                                    | 6434/7834                                                  | 5095/6610                                                 | 44789/54240                                                         |
| 5045/11208<br>8336/11212                                      | 2954/7824<br>4642/7834                                     | 2342/6606<br>3734/6610                                    | 19447/54322<br>34193/54256                                          |
| 1/1778                                                        | 0/1930                                                     | 0/506                                                     | 25/9888                                                             |
| 26/11214                                                      | 25/7866                                                    | 126/6612                                                  | 634/54330                                                           |
| 67/11108<br>8659/11208                                        | 1/7858<br>6451/7854                                        | 296/6604<br>4080/6610                                     | 1696/54282<br>32404/54220                                           |

VEP annotated somatic variants

|                                                                                                    |                                                                                               |                                                                                                |                                                                                                               |
|----------------------------------------------------------------------------------------------------|-----------------------------------------------------------------------------------------------|------------------------------------------------------------------------------------------------|---------------------------------------------------------------------------------------------------------------|
| 9275/11210                                                                                         | 6548/7846                                                                                     | 5057/6614                                                                                      | 37332/54246                                                                                                   |
| 50/11184<br>2399/11212                                                                             | 0/7802<br>1917/7862                                                                           | 0/6600<br>166/6612                                                                             | 45/53380<br>2205/54318                                                                                        |
| 3943/11206<br>6609/11208                                                                           | 1097/7856<br>4789/7846                                                                        | 2997/6606<br>4480/6608                                                                         | 20124/54334<br>39760/54318                                                                                    |
| 5901/11202<br>5675/10578<br>7683/11192<br>7476/11196<br>7190/11144<br>38/11040<br>3/10772          | 3321/7858<br>2980/7080<br>4129/7850<br>4071/7826<br>3134/7822<br>0/7690<br>0/7370             | 1874/6610<br>1739/6474<br>4401/6608<br>3343/6586<br>3008/6596<br>166/6546<br>65/6554           | 18325/54330<br>16828/51218<br>36376/54278<br>31769/54168<br>28781/53968<br>732/52408<br>87/52622              |
| 10/232                                                                                             | 1/320                                                                                         | 57/1636                                                                                        | 283/3992                                                                                                      |
| 361/3778<br>5297/10842<br>1790/11154<br>2787/10738<br>1902/10200                                   | 306/3100<br>5030/7712<br>1049/7862<br>2461/7582<br>916/7322                                   | 682/2262<br>3227/6384<br>1562/6606<br>880/6292<br>833/5668                                     | 4603/25386<br>25028/52946<br>12295/54314<br>7718/50100<br>9013/50108                                          |
| 221/11206                                                                                          | 2382/7852                                                                                     | 241/6612                                                                                       | 2740/54310                                                                                                    |
| 13/11100                                                                                           | 3/7750                                                                                        | 5/6606                                                                                         | 383/51290                                                                                                     |
| 30/10688<br>4065/10324<br>610/2062                                                                 | 0/7288<br>450/7132<br>407/2698                                                                | 11/6484<br>2470/6368<br>1013/1922                                                              | 647/52334<br>19924/51672<br>10765/21826                                                                       |
| 4653/10994<br>898/1802<br>6530/11192<br>16/332<br>2052/3438<br>6190/8672<br>3517/6424<br>703/11120 | 5496/7790<br>1765/2412<br>2303/7844<br>9/322<br>2506/3324<br>5583/6386<br>3651/4896<br>2/7792 | 1920/6544<br>1145/2794<br>4454/6606<br>2/1688<br>521/2218<br>1875/3492<br>487/2278<br>369/6598 | 13745/53576<br>5805/15870<br>34240/54292<br>173/5784<br>3446/12918<br>19938/38410<br>4940/24474<br>6572/52430 |

VEP annotated somatic variants

|            |           |           |             |
|------------|-----------|-----------|-------------|
| 74/8680    | 0/5762    | 160/4305  | 1289/35815  |
| 0/11204    | 0/7858    | 0/6592    | 1/53640     |
| 7438/11216 | 3423/7842 | 3939/6612 | 31699/54342 |
| 863/11206  | 1467/7850 | 496/6610  | 3244/54058  |
| 39/144     | 36/142    | 222/1208  | 541/2924    |
| 5748/11186 | 5250/7842 | 1255/6608 | 6214/54334  |
| 803/11156  | 394/7804  | 935/6548  | 5873/54118  |
| 6500/8003  | 4048/5141 | 1780/3338 | 16181/30932 |
| 903/11210  | 1544/7852 | 257/6612  | 1652/54312  |
| 2379/11116 | 3041/7778 | 761/6592  | 4200/53532  |
| 2188/4582  | 3201/4424 | 1036/2104 | 13848/28064 |
| 6088/11200 | 4087/7850 | 1881/6610 | 16736/54308 |
| 5734/11062 | 4941/7808 | 3189/6502 | 27752/53150 |
| 687/4786   | 120/4846  | 454/2604  | 5296/32838  |
| 4910/11196 | 3676/7838 | 1555/6612 | 11649/54270 |
| 2433/11114 | 292/7732  | 1420/6446 | 9673/51994  |
| 5907/11194 | 4085/7844 | 1995/6612 | 14969/54210 |
| 4393/11176 | 2858/7854 | 2263/6610 | 19273/54302 |
| 6512/11076 | 6322/7832 | 3558/6586 | 26453/53646 |
| 5893/11212 | 4913/7856 | 3252/6610 | 28650/54336 |
| 29/60      | 2/4       | 60/220    | 53/148      |
| 2528/9006  | 244/6031  | 1691/4523 | 15566/38457 |
| 82/11200   | 1/7850    | 9/6578    | 656/54068   |
| 2810/11216 | 2678/7854 | 2022/6612 | 19721/54334 |
| 2252/11114 | 3815/7742 | 2705/6580 | 17774/53978 |
| 9118/11210 | 3086/7834 | 4765/6580 | 44315/54320 |
| 2613/11098 | 1474/7780 | 2148/6576 | 13299/52434 |
| 2744/5944  | 1267/4414 | 1821/4560 | 14498/35232 |

VEP annotated somatic variants

| ExAC_AC_AN_OTH | ExAC_AC_AN_SAS | ExAC_FILTER            | MAF         |
|----------------|----------------|------------------------|-------------|
| 18/682         | 253/15732      | PASS                   | 0.117647059 |
|                |                |                        | 0.3125      |
|                |                |                        | 0.125       |
| 424/694        | 10145/16406    | PASS                   | 0.120879121 |
|                |                |                        | 0.107142857 |
|                |                |                        | 0.4         |
| 351/616        | 9047/15250     | PASS                   | 0.107142857 |
| 442/692        | 10446/16388    | PASS                   | 0.15        |
| 0/690          | 0/16408        | PASS                   | 0.115044248 |
|                |                |                        | 0.277777778 |
| 193/682        | 4754/16366     | PASS                   | 0.138888889 |
| 0/32           | 59/1052        | PASS                   | 0.266666667 |
| 136/684        | 2378/16396     | PASS                   | 0.117647059 |
| 554/674        | 12899/16374    | PASS                   | 0.146341463 |
| 12/206         | 426/9286       | PASS                   | 0.121212121 |
|                |                |                        | 0.107142857 |
|                |                |                        | 0.2         |
|                |                |                        | 0.173913043 |
|                |                |                        | 0.147058824 |
| 0/130          | 0/7470         | AC_Adj0_Filter         | 0.12        |
| 20/686         | 1976/16276     | PASS                   | 0.103448276 |
| 456/694        | 11465/16402    | PASS                   | 0.151515152 |
| 236/656        | 4476/14946     | PASS                   | 0.1875      |
|                |                |                        | 0.125       |
|                |                |                        | 0.179104478 |
|                |                | PASS                   | 0.109756098 |
| 111/672        | 2341/16230     | PASS                   | 0.14893617  |
|                |                |                        | 0.132352941 |
| 99/318         | 2501/10272     | PASS                   | 0.113636364 |
| 327/678        | 7704/16188     | PASS                   | 0.155172414 |
| 0/186          | 12/7592        | PASS                   | 0.12962963  |
| 386/632        | 9538/12592     | PASS                   | 0.114649682 |
| 14/686         | 423/16006      | PASS                   | 0.119565217 |
| 99/468         | 2792/11812     | PASS                   | 0.117647059 |
| 6/114          | 629/7472       | IRTrancheINDEL97.00to9 | 0.12        |
|                |                |                        | 0.2         |
| 152/682        | 5808/15852     | PASS                   | 0.119318182 |
| 432/694        | 8291/16240     | PASS                   | 0.25        |
| 15/468         | 231/9928       | PASS                   | 0.185185185 |
|                |                |                        | 0.117647059 |
| 70/174         | 3309/7746      | PASS                   | 0.125       |
| 370/690        | 7986/16394     | PASS                   | 0.14084507  |
|                |                |                        | 0.125       |
|                |                |                        | 0.111111111 |
| 100/694        | 5067/16402     | PASS                   | 0.15        |
|                |                |                        | 0.15        |
| 151/476        | 2308/12622     | PASS                   | 0.133333333 |
| 8/692          | 30/16406       | PASS                   | 0.11627907  |
| 158/694        | 2915/16408     | PASS                   | 0.105726872 |
|                |                |                        | 0.235294118 |
| 267/630        | 6129/15126     | PASS                   | 0.107142857 |
|                |                |                        | 0.13559322  |
| 479/686        | 12419/16234    | PASS                   | 0.176470588 |
|                |                |                        | 0.272727273 |

VEP annotated somatic variants

|         |             |                       |             |
|---------|-------------|-----------------------|-------------|
| 168/620 | 1621/11250  | PASS                  | 0.227272727 |
| 145/678 | 2494/16212  | PASS                  | 0.107692308 |
|         |             |                       | 0.160493827 |
|         |             |                       | 0.128571429 |
| 50/694  | 1279/16374  | PASS                  | 0.107692308 |
|         |             |                       | 0.333333333 |
| 509/694 | 13583/16406 | PASS                  | 0.181818182 |
| 42/108  | 1461/3874   | SRTrancheSNP99.60to99 | 0.206896552 |
| 182/686 | 4780/16346  | PASS                  | 0.108433735 |
| 119/602 | 1701/12254  | PASS                  | 0.12962963  |
| 125/612 | 2681/11020  | PASS                  | 0.137931034 |
|         |             |                       | 0.135135135 |
| 147/670 | 3435/16272  | PASS                  | 0.166666667 |
| 568/678 | 14338/16318 | PASS                  | 0.1         |
| 51/248  | 1823/8912   | PASS                  | 0.2         |
| 55/692  | 413/16330   | PASS                  | 0.128205128 |
| 32/690  | 386/16318   | PASS                  | 0.214285714 |
|         |             |                       | 0.1875      |
|         |             |                       | 0.15        |
|         |             |                       | 0.191489362 |
|         |             |                       | 0.145833333 |
|         |             |                       | 0.139534884 |
| 0/692   | 1/16346     | PASS                  | 0.125       |
|         |             |                       | 0.115384615 |
|         |             |                       | 0.23255814  |
|         |             |                       | 0.103448276 |
| 185/672 | 2312/16004  | PASS                  | 0.133333333 |
| 183/652 | 2207/14654  | PASS                  | 0.103448276 |
|         |             |                       | 0.173913043 |
| 36/690  | 489/16396   | PASS                  | 0.108695652 |
|         |             |                       | 0.222222222 |
| 44/694  | 505/16408   | PASS                  | 0.208633094 |
| 188/686 | 5318/16154  | PASS                  | 0.259259259 |
| 76/455  | 2171/8805   | PASS                  | 0.153846154 |
| 10/194  | 26/3118     | PASS                  | 0.19047619  |
|         |             |                       | 0.114285714 |
|         |             |                       | 0.15        |
|         |             |                       | 0.75        |
| 212/694 | 4541/16380  | PASS                  | 0.102564103 |
| 127/692 | 4085/16400  | PASS                  | 0.106382979 |
|         |             |                       | 0.197530864 |
| 37/692  | 260/16398   | PASS                  | 0.138888889 |
|         |             |                       | 0.161290323 |
| 64/113  | 2311/4215   | PASS                  | 0.353846154 |
| 66/117  | 2458/4535   | PASS                  | 0.211538462 |
|         |             |                       | 0.169491525 |
| 38/74   | 2085/4520   | PASS                  | 0.148148148 |
| 107/662 | 2179/13632  | PASS                  | 0.189655172 |
|         |             |                       | 0.202380952 |
| 94/430  | 2176/13136  | PASS                  | 0.138211382 |
| 39/690  | 372/16380   | PASS                  | 0.113821138 |
|         |             |                       | 0.135135135 |
| 148/538 | 2982/11840  | PASS                  | 0.134146341 |
|         |             |                       | 0.15        |
| 47/670  | 992/14616   | PASS                  | 0.166666667 |

VEP annotated somatic variants

|         |             |      |             |
|---------|-------------|------|-------------|
|         |             |      | 0.107142857 |
|         |             |      | 0.192307692 |
| 136/252 | 2926/6700   | PASS | 0.14084507  |
| 215/636 | 3141/12520  | PASS | 0.125       |
|         |             |      | 0.118644068 |
|         |             |      | 0.333333333 |
| 335/524 | 7696/11394  | PASS | 0.142857143 |
|         |             |      | 0.166666667 |
| 85/604  | 2828/13524  | PASS | 0.15625     |
| 18/694  | 170/16332   | PASS | 0.153846154 |
|         |             |      | 0.106382979 |
| 18/596  | 276/14794   | PASS | 0.119205298 |
| 90/694  | 1706/16408  | PASS | 0.102941176 |
| 244/694 | 4622/16404  | PASS | 0.14516129  |
| 63/690  | 1056/16404  | PASS | 0.160714286 |
|         |             |      | 0.296296296 |
| 103/469 | 3748/10035  | PASS | 0.185185185 |
|         |             |      | 0.125       |
|         |             |      | 0.118811881 |
| 174/682 | 3752/16088  | PASS | 0.111111111 |
| 262/694 | 5299/16386  | PASS | 0.192307692 |
| 194/694 | 8578/16154  | PASS | 0.122137405 |
| 346/367 | 6604/6676   | PASS | 0.35        |
| 194/457 | 4884/9475   | PASS | 0.166666667 |
| 183/690 | 3615/16178  | PASS | 0.103448276 |
| 262/672 | 5043/15882  | PASS | 0.325       |
| 526/694 | 12067/16408 | PASS | 0.113821138 |
|         |             |      | 0.119047619 |
|         |             |      | 0.666666667 |
| 288/694 | 7765/16394  | PASS | 0.16        |
| 76/664  | 2645/16254  | PASS | 0.103448276 |
|         |             |      | 0.105263158 |
| 61/410  | 445/6181    | PASS | 0.166666667 |
|         |             |      | 0.210526316 |
|         |             |      | 0.103448276 |
|         |             |      | 0.135416667 |
| 12/124  | 354/5124    | PASS | 0.166666667 |
|         |             |      | 0.166666667 |
|         |             |      | 0.117647059 |
| 1/654   | 14/15458    | PASS | 0.134615385 |
|         |             |      | 0.16        |
|         |             |      | 0.104166667 |
|         |             |      | 0.121212121 |
|         |             |      | 0.12        |
| 84/610  | 460/14776   | PASS | 0.1         |
| 197/692 | 3369/16320  | PASS | 0.12345679  |
| 0/8     | 23/388      | PASS | 0.173076923 |
| 0/0     | 77/204      | PASS | 0.173913043 |
|         |             |      | 0.111111111 |
|         |             |      | 0.428571429 |
| 83/692  | 2267/16264  | PASS | 0.103448276 |
|         |             |      | 0.136363636 |
|         |             |      | 0.214285714 |
| 261/350 | 6686/10684  | PASS | 0.342857143 |
| 184/672 | 3821/15644  | PASS | 0.120689655 |

VEP annotated somatic variants

|         |             |      |                                                                         |
|---------|-------------|------|-------------------------------------------------------------------------|
| 66/174  | 2502/7774   | PASS | 0.103448276<br>0.18627451<br>0.1<br>0.25                                |
| 43/694  | 243/16402   | PASS | 0.166666667                                                             |
| 65/174  | 3335/6948   | PASS | 0.14893617                                                              |
| 96/690  | 4087/16290  | PASS | 0.103448276<br>0.142857143<br>0.109090909                               |
| 226/694 | 4829/16344  | PASS | 0.140625                                                                |
| 348/652 | 9363/15072  | PASS | 0.105263158                                                             |
| 218/684 | 6314/16248  | PASS | 0.130434783                                                             |
| 103/464 | 2854/9935   | PASS | 0.121621622                                                             |
| 76/694  | 2570/16406  | PASS | 0.133333333<br>0.117647059<br>0.1875                                    |
| 104/660 | 4168/14234  | PASS | 0.245901639                                                             |
| 128/566 | 2631/8696   | PASS | 0.142857143                                                             |
|         |             | PASS | 0.1<br>0.2                                                              |
| 398/606 | 10905/15354 | PASS | 0.136363636<br>0.12                                                     |
| 43/654  | 1220/15490  | PASS | 0.15625                                                                 |
| 112/694 | 1994/16406  | PASS | 0.111111111                                                             |
| 50/128  | 2407/7500   | PASS | 0.121212121<br>0.125                                                    |
| 146/654 | 5954/15076  | PASS | 0.216216216                                                             |
| 4/214   | 26/8898     | PASS | 0.14159292                                                              |
| 3/692   | 13/16404    | PASS | 0.308823529<br>0.142857143                                              |
| 149/690 | 5642/16390  | PASS | 0.142857143<br>0.176470588<br>0.1875                                    |
| 81/692  | 1677/16392  | PASS | 0.133333333<br>0.136986301<br>0.155555556<br>0.142857143<br>0.157894737 |
| 1/106   | 64/5650     | PASS | 0.185185185<br>0.121212121                                              |
| 114/658 | 3645/15694  | PASS | 0.146341463                                                             |
| 98/660  | 584/13884   | PASS | 0.230769231<br>0.157894737<br>0.214285714                               |
| 11/626  | 81/13068    | PASS | 0.123076923                                                             |
| 150/536 | 3314/9210   | PASS | 0.1875                                                                  |
| 227/688 | 5725/16402  | PASS | 0.125<br>0.142857143<br>0.166666667<br>0.176470588<br>0.121212121       |
| 53/670  | 436/15950   | PASS | 0.125                                                                   |
| 9/664   | 37/15892    | PASS | 0.104575163                                                             |
| 317/664 | 3904/15256  | PASS | 0.153846154                                                             |
| 200/684 | 5773/16302  | PASS | 0.171428571                                                             |



VEP annotated somatic variants

|         |             |                        |             |
|---------|-------------|------------------------|-------------|
| 195/688 | 5049/16392  | PASS                   | 0.12        |
|         |             |                        | 0.115384615 |
| 0/690   | 0/16154     | PASS                   | 0.137931034 |
|         |             |                        | 0.133333333 |
| 1/688   | 2/16330     | PASS                   | 0.121212121 |
|         |             |                        | 0.107142857 |
|         |             |                        | 0.155172414 |
| 85/562  | 552/14036   | PASS                   | 0.166666667 |
| 138/690 | 2668/16362  | PASS                   | 0.143564356 |
|         |             |                        | 0.172413793 |
| 109/676 | 2696/15164  | PASS                   | 0.153846154 |
|         |             |                        | 0.272727273 |
| 74/450  | 291/12012   | PASS                   | 0.110091743 |
| 264/694 | 4666/16390  | PASS                   | 0.149253731 |
| 209/694 | 3852/16382  | PASS                   | 0.164835165 |
| 424/694 | 9824/16338  | PASS                   | 0.111111111 |
|         |             |                        | 0.151515152 |
| 138/694 | 4327/16388  | PASS                   | 0.108333333 |
|         |             |                        | 0.151515152 |
| 7/170   | 93/8502     | SRTrancheINDEL97.00to9 | 0.133333333 |
|         |             |                        | 0.136363636 |
|         |             |                        | 0.130434783 |
| 278/694 | 7329/16404  | PASS                   | 0.123287671 |
| 479/692 | 13105/16404 | PASS                   | 0.173469388 |
| 0/612   | 8/10980     | PASS                   | 0.136363636 |
|         |             |                        | 0.142857143 |
| 20/670  | 45/14846    | PASS                   | 0.115789474 |
|         |             |                        | 0.111111111 |
| 132/694 | 3193/16398  | PASS                   | 0.12195122  |
|         |             |                        | 0.111111111 |
| 2/124   | 41/7674     | PASS                   | 0.132075472 |
| 17/122  | 506/7548    | PASS                   | 0.125       |
| 90/242  | 3100/9196   | PASS                   | 0.116883117 |
|         |             |                        | 0.214285714 |
|         |             |                        | 0.151515152 |
|         |             |                        | 0.136363636 |
|         |             |                        | 0.235294118 |
| 129/690 | 2058/16128  | PASS                   | 0.153846154 |
|         |             |                        | 0.18        |
| 26/108  | 1701/6366   | PASS                   | 0.179487179 |
| 84/248  | 2537/5782   | PASS                   | 0.151515152 |
| 49/694  | 1471/16406  | PASS                   | 0.112903226 |
|         |             |                        | 0.157894737 |
|         |             |                        | 0.1         |
|         |             |                        | 0.175       |
| 483/692 | 10823/16378 | PASS                   | 0.157894737 |
| 433/694 | 10983/16406 | PASS                   | 0.106382979 |
|         |             |                        | 0.115384615 |
|         |             |                        | 0.173913043 |
|         |             |                        | 0.2         |
| 449/688 | 11475/16374 | PASS                   | 0.129032258 |
| 163/694 | 4439/16386  | PASS                   | 0.123287671 |
| 120/686 | 2863/16018  | SRTrancheSNP99.80to9   | 0.179487179 |
| 40/76   | 930/1808    | PASS                   | 0.162162162 |
|         |             |                        | 0.208333333 |

VEP annotated somatic variants

|         |             |      |             |
|---------|-------------|------|-------------|
| 86/694  | 2692/16396  | PASS | 0.130952381 |
|         |             |      | 0.112676056 |
|         |             |      | 0.119047619 |
| 51/630  | 1707/11758  | PASS | 0.179104478 |
| 355/630 | 7196/15244  | PASS | 0.120879121 |
| 202/634 | 3819/15572  | PASS | 0.1         |
|         |             |      | 0.105263158 |
| 327/369 | 7630/8486   | PASS | 0.147058824 |
| 25/692  | 124/16336   | PASS | 0.133333333 |
|         |             |      | 0.103448276 |
|         |             |      | 0.115384615 |
|         |             |      | 0.115384615 |
| 106/564 | 848/13212   | PASS | 0.148148148 |
| 118/468 | 2732/10021  | PASS | 0.230769231 |
|         |             |      | 0.142857143 |
| 77/640  | 2954/14260  | PASS | 0.147058824 |
| 621/694 | 13507/16298 | PASS | 0.102564103 |
|         |             |      | 0.5         |
|         |             |      | 0.222222222 |
| 222/694 | 7045/16408  | PASS | 0.149253731 |
|         |             |      | 0.333333333 |
| 149/694 | 2927/16406  | PASS | 0.108108108 |
|         |             |      | 0.15        |
| 240/694 | 5349/16342  | PASS | 0.142857143 |
| 123/694 | 3475/16354  | PASS | 0.134328358 |
|         |             |      | 0.107142857 |
| 5/688   | 26/16206    | PASS | 0.145454545 |
| 320/690 | 10857/16358 | PASS | 0.222222222 |
| 165/610 | 2326/14884  | PASS | 0.163265306 |
|         |             |      | 0.285714286 |
|         |             |      | 0.242857143 |
|         |             |      | 0.146341463 |
|         |             |      | 0.115384615 |
| 260/684 | 5741/16322  | PASS | 0.1         |
| 100/425 | 2843/7003   | PASS | 0.216216216 |
|         |             |      | 0.142857143 |
| 345/692 | 7582/16396  | PASS | 0.133858268 |
|         |             |      | 0.108108108 |
| 247/686 | 5166/16388  | PASS | 0.116666667 |
| 124/692 | 2470/16370  | PASS | 0.145454545 |
|         |             |      | 0.5         |
|         |             |      | 0.142857143 |
|         |             |      | 0.2         |
| 45/688  | 1071/16392  | PASS | 0.14        |
| 44/90   | 2200/6068   | PASS | 0.130434783 |
| 2/684   | 401/16248   | PASS | 0.106382979 |
|         |             |      | 0.176470588 |
|         |             |      | 0.150793651 |
| 92/694  | 2151/16396  | PASS | 0.107692308 |
|         |             |      | 0.142857143 |
| 8/694   | 33/16376    | PASS | 0.136363636 |
|         |             |      | 0.263157895 |
| 19/26   | 1198/2144   | PASS | 0.136363636 |
| 270/460 | 6244/9696   | PASS | 0.352941176 |
|         |             |      | 0.157894737 |

VEP annotated somatic variants

|         |             |      |             |
|---------|-------------|------|-------------|
| 329/620 | 7457/15624  | PASS | 0.105263158 |
| 281/610 | 5377/10954  | PASS | 0.162790698 |
| 21/100  | 1389/6616   | PASS | 0.132075472 |
| 256/674 | 6574/15340  | PASS | 0.12345679  |
| 183/694 | 3427/16368  | PASS | 0.11        |
| 52/694  | 3045/16404  | PASS | 0.171875    |
| 37/118  | 2621/7506   | PASS | 0.16        |
| 7/694   | 51/16408    | PASS | 0.108695652 |
|         |             |      | 0.159090909 |
| 0/648   | 0/12634     | PASS | 0.15625     |
| 456/650 | 11416/15790 | PASS | 0.134328358 |
| 471/690 | 11699/16406 | PASS | 0.101123596 |
| 105/694 | 1069/16404  | PASS | 0.120689655 |
|         |             |      | 0.157894737 |
|         |             |      | 0.107142857 |
|         |             |      | 0.347826087 |
|         |             |      | 0.3         |
|         |             |      | 0.139534884 |
|         |             |      | 0.285714286 |
| 175/690 | 3761/16408  | PASS | 0.8         |
| 296/590 | 6307/11748  | PASS | 0.146341463 |
| 175/694 | 4306/16406  | PASS | 0.145454545 |
|         |             |      | 0.137931034 |
| 452/680 | 9701/16066  | PASS | 0.106382979 |
|         |             |      | 0.148148148 |
| 117/694 | 2945/16406  | PASS | 0.140495868 |
|         |             |      | 0.105263158 |
| 246/694 | 3403/16406  | PASS | 0.125       |
| 95/694  | 2447/16254  | PASS | 0.168421053 |
|         |             |      | 0.15        |
| 195/694 | 4077/16384  | PASS | 0.147540984 |
|         |             |      | 0.266666667 |
| 92/174  | 4655/8158   | PASS | 0.12        |
| 80/690  | 513/16116   | PASS | 0.176470588 |
|         |             |      | 0.142857143 |
| 221/692 | 8493/16400  | PASS | 0.147058824 |
|         |             |      | 0.186567164 |
|         |             |      | 0.163636364 |
| 0/194   | 0/8008      | PASS | 0.119047619 |
| 329/580 | 9139/15006  | PASS | 0.125       |
|         |             |      | 0.13253012  |
| 246/672 | 6278/16368  | PASS | 0.196969697 |
| 40/118  | 1982/7506   | PASS | 0.19047619  |
|         |             |      | 0.142857143 |
| 183/662 | 4014/14540  | PASS | 0.135135135 |
| 0/674   | 0/16146     | PASS | 0.12962963  |
|         |             |      | 0.115384615 |
|         |             |      | 0.117647059 |
|         |             |      | 0.222222222 |
|         |             |      | 0.163636364 |
|         |             |      | 0.1         |
|         |             |      | 0.107142857 |
| 57/114  | 2509/4538   | PASS | 0.1         |
| 4/688   | 54/15902    | PASS | 0.169230769 |
|         |             |      | 0.2         |

VEP annotated somatic variants

|         |             |      |             |
|---------|-------------|------|-------------|
|         |             |      | 0.222222222 |
| 27/212  | 1968/7144   | PASS | 0.107142857 |
|         |             |      | 0.133333333 |
| 54/124  | 4409/7890   | PASS | 0.152173913 |
|         |             |      | 0.189189189 |
| 38/72   | 2271/4434   | PASS | 0.172413793 |
|         |             |      | 0.142857143 |
|         |             |      | 0.13559322  |
| 10/172  | 532/7654    | PASS | 0.135135135 |
|         |             |      | 0.222222222 |
|         |             |      | 0.2         |
| 220/640 | 4049/12278  | PASS | 0.2         |
| 28/590  | 463/12290   | PASS | 0.151515152 |
| 27/522  | 166/12718   | PASS | 0.142857143 |
|         |             |      | 0.12        |
|         |             |      | 0.14084507  |
|         |             |      | 0.222222222 |
| 36/690  | 1563/16408  | PASS | 0.147239264 |
| 149/588 | 3583/15168  | PASS | 0.135338346 |
| 484/682 | 12207/16150 | PASS | 0.147058824 |
|         |             |      | 0.12        |
| 129/662 | 1572/14400  | PASS | 0.117647059 |
| 33/694  | 979/16406   | PASS | 0.104166667 |
| 162/413 | 1122/6221   | PASS | 0.166666667 |
| 140/347 | 843/4982    | PASS | 0.159090909 |
|         |             |      | 0.14893617  |
| 161/654 | 4308/13776  | PASS | 0.1         |
|         |             |      | 0.24        |
| 494/694 | 11270/16406 | PASS | 0.174603175 |
| 104/680 | 2564/16284  | PASS | 0.172727273 |
| 13/630  | 140/15036   | PASS | 0.327272727 |
|         |             |      | 0.125       |
|         |             |      | 0.155172414 |
|         |             |      | 0.162790698 |
| 8/662   | 46/15326    | PASS | 0.113636364 |
| 152/660 | 4675/14480  | PASS | 0.109589041 |
| 140/382 | 3562/10332  | PASS | 0.16        |
| 106/482 | 2733/13734  | PASS | 0.118181818 |
| 63/688  | 1463/15934  | PASS | 0.125       |
|         |             |      | 0.25        |
|         |             |      | 0.107142857 |
|         |             | PASS | 0.206896552 |
| 31/694  | 652/16408   | PASS | 0.138613861 |
| 148/336 | 4244/11416  | PASS | 0.149253731 |
| 73/674  | 864/15738   | PASS | 0.1         |
|         |             |      | 0.115384615 |
|         |             |      | 0.107142857 |
| 333/694 | 6561/16400  | PASS | 0.104477612 |
|         |             |      | 0.130434783 |
|         |             |      | 0.136363636 |
|         |             |      | 0.111111111 |
|         |             |      | 0.5         |
|         |             |      | 0.125       |
|         |             |      | 0.132352941 |
| 207/684 | 5188/16236  | PASS | 0.185185185 |

VEP annotated somatic variants

|         |            |      |                                           |
|---------|------------|------|-------------------------------------------|
| 155/690 | 2201/16404 | PASS | 0.120879121<br>0.133333333                |
| 120/188 | 5497/7936  | PASS | 0.112903226                               |
| 275/462 | 2393/9984  | PASS | 0.153846154                               |
| 105/437 | 2412/8808  | PASS | 0.103448276                               |
| 319/694 | 5268/16406 | PASS | 0.15                                      |
| 280/694 | 4736/16386 | PASS | 0.14379085                                |
| 294/694 | 4941/16406 | PASS | 0.108527132<br>0.307692308<br>0.115384615 |
| 243/694 | 7584/16406 | PASS | 0.123287671<br>0.206896552<br>0.2         |
| 424/694 | 8985/16376 | PASS | 0.125                                     |
| 305/620 | 6188/12658 | PASS | 0.111111111                               |
| 305/616 | 6090/12518 | PASS | 0.111111111                               |
| 42/440  | 897/12868  | PASS | 0.114754098<br>0.14159292<br>0.111111111  |
| 14/694  | 267/16404  | PASS | 0.134615385<br>0.125<br>0.19047619        |
| 45/652  | 194/15610  | PASS | 0.142857143                               |
| 122/694 | 3828/16408 | PASS | 0.14516129                                |
| 52/694  | 990/16382  | PASS | 0.111111111<br>0.117647059<br>0.118421053 |
| 296/690 | 7261/16402 | PASS | 0.244444444                               |
| 74/666  | 1124/15948 | PASS | 0.107142857                               |
| 319/660 | 5719/15788 | PASS | 0.133858268                               |
| 25/122  | 1253/7574  | PASS | 0.214285714<br>0.153846154                |
| 65/138  | 5269/8052  | PASS | 0.25<br>0.183673469<br>0.169230769        |
| 20/694  | 46/16408   | PASS | 0.121076233<br>0.333333333                |
| 242/692 | 4781/16408 | PASS | 0.128205128<br>0.142857143                |
| 86/584  | 1929/13974 | PASS | 0.2                                       |
| 67/467  | 543/10010  | PASS | 0.135135135                               |
| 50/465  | 507/9976   | PASS | 0.133333333<br>0.272727273                |
| 149/445 | 3369/8392  | PASS | 0.235294118                               |
| 119/694 | 1854/16346 | PASS | 0.142857143                               |
| 109/670 | 4176/14860 | PASS | 0.130434783                               |
| 315/630 | 8360/15690 | PASS | 0.184615385                               |
| 221/694 | 6933/16408 | PASS | 0.109375<br>0.272727273<br>0.272727273    |
| 331/443 | 6155/9564  | PASS | 0.131147541                               |
| 24/74   | 601/3574   | PASS | 0.111111111                               |
| 83/688  | 2168/16296 | PASS | 0.152173913                               |
| 7/690   | 60/16374   | PASS | 0.192307692                               |
| 62/688  | 799/16264  | PASS | 0.111111111                               |

VEP annotated somatic variants

|         |             |                        |                                                                 |
|---------|-------------|------------------------|-----------------------------------------------------------------|
| 77/136  | 4507/7404   | PASS                   | 0.142857143<br>0.1<br>0.115384615<br>0.444444444<br>0.177419355 |
| 41/138  | 2336/8090   | PASS                   | 0.151515152                                                     |
| 572/694 | 13951/16398 | PASS                   | 0.146341463                                                     |
| 76/180  | 3421/7842   | PASS                   | 0.14                                                            |
| 18/690  | 206/16398   | PASS                   | 0.106382979<br>0.103448276                                      |
| 503/694 | 12246/16408 | PASS                   | 0.148148148<br>0.125                                            |
| 503/694 | 12267/16400 | PASS                   | 0.123287671                                                     |
| 327/692 | 6701/16210  | PASS                   | 0.108108108                                                     |
| 134/694 | 4065/16400  | PASS                   | 0.155172414<br>0.125786164                                      |
| 102/524 | 1635/13392  | PASS                   | 0.160493827<br>0.153846154                                      |
| 94/492  | 1752/14048  | PASS                   | 0.140350877<br>0.107142857                                      |
| 0/352   | 1/10958     | PASS                   | 0.126984127                                                     |
| 80/646  | 1939/15430  | PASS                   | 0.155555556<br>0.114285714                                      |
| 188/690 | 5114/16402  | PASS                   | 0.153061224                                                     |
| 226/666 | 5095/14844  | PASS                   | 0.170731707<br>0.115384615<br>0.25<br>0.3                       |
| 291/694 | 8784/16386  | PASS                   | 0.166666667<br>0.111111111                                      |
| 203/678 | 5820/16272  | PASS                   | 0.258823529                                                     |
| 452/690 | 10508/16400 | PASS                   | 0.103773585<br>0.182926829                                      |
| 258/694 | 7360/16406  | PASS                   | 0.173469388<br>0.130434783<br>0.103448276                       |
| 8/648   | 488/14602   | PASS                   | 0.109375<br>0.117647059                                         |
| 30/690  | 216/16400   | PASS                   | 0.115384615                                                     |
| 170/694 | 6046/16402  | PASS                   | 0.111111111                                                     |
| 8/462   | 3/10036     | PASS                   | 0.233333333<br>0.183098592<br>0.128440367<br>0.375              |
| 57/694  | 3071/16408  | PASS                   | 0.185714286                                                     |
| 77/144  | 4272/7930   | IRTrancheINDEL95.00to9 | 0.118644068<br>0.133333333<br>0.121212121                       |
| 510/690 | 10480/16396 | PASS                   | 0.155555556                                                     |
| 472/660 | 9841/15608  | PASS                   | 0.103174603                                                     |
| 150/694 | 3457/16408  | PASS                   | 0.105769231<br>0.24<br>0.15                                     |
| 506/690 | 9687/16348  | PASS                   | 0.158730159<br>0.3                                              |

VEP annotated somatic variants

|         |            |      |             |
|---------|------------|------|-------------|
| 241/588 | 3193/10014 | PASS | 0.285714286 |
| 161/690 | 1480/16400 | PASS | 0.117647059 |
| 254/690 | 4753/16400 | PASS | 0.103448276 |
| 70/186  | 2864/7854  | PASS | 0.115646259 |
|         |            |      | 0.174603175 |
|         |            |      | 0.176470588 |
|         |            |      | 0.116666667 |
| 4/684   | 0/16040    | PASS | 0.149606299 |
| 310/632 | 9490/15716 | PASS | 0.191489362 |
| 250/674 | 4963/16326 | PASS | 0.146067416 |
| 81/146  | 4434/8246  | PASS | 0.154285714 |
|         |            |      | 0.210526316 |
|         |            | PASS | 0.166666667 |
| 272/604 | 5279/11426 | PASS | 0.285714286 |
|         |            |      | 0.125       |
| 393/688 | 9456/16400 | PASS | 0.159090909 |
|         |            |      | 0.129411765 |
| 14/688  | 51/16404   | PASS | 0.104895105 |
| 204/610 | 5167/15440 | PASS | 0.117021277 |
| 176/694 | 3839/16384 | PASS | 0.118421053 |
| 241/694 | 3584/16408 | PASS | 0.175       |
| 261/694 | 4136/16406 | PASS | 0.128712871 |
| 21/694  | 290/16408  | PASS | 0.195121951 |
| 20/694  | 260/16408  | PASS | 0.128440367 |
|         |            |      | 0.107142857 |
|         |            |      | 0.25        |
|         |            |      | 0.347826087 |
| 135/682 | 3000/15548 | PASS | 0.171428571 |
| 137/694 | 3019/16406 | PASS | 0.101265823 |
| 19/126  | 599/7850   | PASS | 0.156028369 |
| 73/694  | 917/16408  | PASS | 0.126760563 |
| 187/694 | 5731/16406 | PASS | 0.119402985 |
|         |            |      | 0.219512195 |
| 62/658  | 2866/14440 | PASS | 0.108108108 |
|         |            |      | 0.206896552 |
|         |            |      | 0.106382979 |
| 191/694 | 4480/16396 | PASS | 0.155555556 |
| 26/124  | 1552/7244  | PASS | 0.131578947 |
| 59/586  | 2223/15500 | PASS | 0.111111111 |
| 10/98   | 69/4554    | PASS | 0.121212121 |
| 5/524   | 152/10024  | PASS | 0.2         |
| 332/694 | 5252/16406 | PASS | 0.12195122  |
| 95/694  | 1439/16404 | PASS | 0.132352941 |
| 227/694 | 3869/16404 | PASS | 0.128205128 |
|         |            |      | 0.16        |
| 291/586 | 8393/15910 | PASS | 0.144578313 |
| 441/452 | 9737/9744  | PASS | 0.317073171 |
| 53/449  | 295/9015   | PASS | 0.166666667 |
| 58/616  | 1493/14464 | PASS | 0.129032258 |
|         |            |      | 0.138888889 |
|         |            |      | 0.125       |
| 178/694 | 3252/16378 | PASS | 0.126712329 |
| 146/688 | 4486/15976 | PASS | 0.117647059 |
| 35/674  | 858/16016  | PASS | 0.125       |
| 222/666 | 6780/16198 | PASS | 0.111111111 |

VEP annotated somatic variants

|         |             |      |             |
|---------|-------------|------|-------------|
| 112/672 | 1997/14982  | PASS | 0.131578947 |
| 61/694  | 3533/16408  | PASS | 0.168674699 |
| 382/692 | 9447/16390  | PASS | 0.134146341 |
|         |             |      | 0.117647059 |
|         |             |      | 0.12        |
| 152/402 | 1549/7631   | PASS | 0.126984127 |
| 257/460 | 7017/12628  | PASS | 0.209876543 |
|         |             |      | 0.1875      |
| 276/688 | 7374/16372  | PASS | 0.154411765 |
| 156/652 | 4807/15528  | PASS | 0.138888889 |
| 9/54    | 97/982      | PASS | 0.172413793 |
| 227/692 | 6993/16404  | PASS | 0.112359551 |
|         |             |      | 0.16        |
|         |             |      | 0.272727273 |
|         |             |      | 0.230769231 |
|         |             |      | 0.115942029 |
|         |             |      | 0.266666667 |
| 4/64    | 348/3470    | PASS | 0.130434783 |
| 417/646 | 9972/13762  | PASS | 0.173913043 |
| 20/103  | 710/4534    | PASS | 0.21875     |
| 185/694 | 2895/16404  | PASS | 0.109243697 |
|         |             |      | 0.153846154 |
| 27/468  | 684/13340   | PASS | 0.148514851 |
|         |             |      | 0.25        |
| 193/648 | 3974/14476  | PASS | 0.147783251 |
| 0/28    | 36/1458     | PASS | 0.128712871 |
|         |             |      | 0.222222222 |
| 54/366  | 342/6392    | PASS | 0.119047619 |
|         |             |      | 0.146341463 |
| 377/636 | 6815/13718  | PASS | 0.106557377 |
| 298/692 | 8136/16380  | PASS | 0.101694915 |
|         |             |      | 0.272727273 |
|         |             |      | 0.256410256 |
| 507/644 | 11377/13080 | PASS | 0.189189189 |
|         |             |      | 0.173913043 |
| 38/688  | 182/16100   | PASS | 0.215189873 |
| 246/346 | 5854/7553   | PASS | 0.37037037  |
| 22/648  | 251/14978   | PASS | 0.147826087 |
| 38/674  | 840/14778   | PASS | 0.111111111 |
| 38/692  | 851/16392   | PASS | 0.101694915 |
| 277/688 | 5907/16396  | PASS | 0.134831461 |
|         |             |      | 0.375       |
|         |             |      | 0.142857143 |
|         |             |      | 0.136363636 |
| 65/146  | 4684/8202   | PASS | 0.117647059 |
| 86/694  | 1406/16224  | PASS | 0.142857143 |
|         |             |      | 0.333333333 |
| 87/694  | 1281/16408  | PASS | 0.158536585 |
| 0/694   | 0/16408     | PASS | 0.108108108 |
| 7/692   | 562/16334   | PASS | 0.114285714 |
| 190/462 | 6358/13742  | PASS | 0.106666667 |
| 427/694 | 11048/16406 | PASS | 0.1         |
|         |             |      | 0.214285714 |
|         |             |      | 0.136363636 |
|         |             |      | 0.36        |



VEP annotated somatic variants

|         |             |      |                                                       |
|---------|-------------|------|-------------------------------------------------------|
| 265/694 | 6119/16380  | PASS | 0.158415842<br>0.136363636                            |
| 96/668  | 1169/15446  | PASS | 0.163043478                                           |
| 299/692 | 8967/16402  | PASS | 0.120689655<br>0.128205128                            |
| 33/130  | 1649/7894   | PASS | 0.128205128<br>0.21875                                |
| 426/694 | 9302/16402  | PASS | 0.142857143                                           |
| 115/646 | 2645/15766  | PASS | 0.105263158<br>0.142857143                            |
| 17/316  | 487/9902    | PASS | 0.108695652                                           |
| 87/678  | 1378/16340  | PASS | 0.165413534                                           |
| 58/560  | 354/14458   | PASS | 0.12295082<br>0.230769231                             |
| 170/678 | 3836/15482  | PASS | 0.119617225                                           |
| 260/460 | 4858/9941   | PASS | 0.25                                                  |
| 0/452   | 0/9460      | PASS | 0.170731707                                           |
| 177/578 | 2350/9282   | PASS | 0.180555556<br>0.176470588                            |
| 57/170  | 3019/7600   | PASS | 0.153846154<br>0.153846154<br>0.161290323             |
| 536/694 | 10955/16398 | PASS | 0.114942529                                           |
| 284/694 | 7807/16400  | PASS | 0.166666667<br>0.1875<br>0.32                         |
| 153/694 | 3515/16406  | PASS | 0.139784946<br>0.12244898<br>0.119047619              |
| 204/464 | 3695/10011  | PASS | 0.176470588                                           |
| 151/468 | 1449/10005  | PASS | 0.155844156<br>0.12<br>0.151515152                    |
| 133/694 | 5310/16408  | PASS | 0.12371134                                            |
| 141/648 | 5738/13862  | PASS | 0.111111111                                           |
| 42/680  | 364/15960   | PASS | 0.131147541<br>0.3                                    |
| 277/694 | 5058/16390  | PASS | 0.114942529                                           |
| 294/692 | 7915/16350  | PASS | 0.125                                                 |
| 5/694   | 31/16408    | PASS | 0.113636364<br>0.103448276<br>0.164835165<br>0.140625 |
| 109/568 | 1926/14248  | PASS | 0.149122807<br>0.333333333                            |
| 192/688 | 4299/16384  | PASS | 0.112359551                                           |
| 199/692 | 4259/16406  | PASS | 0.333333333                                           |
| 21/520  | 192/13796   | PASS | 0.137931034<br>0.111111111<br>0.4<br>0.1875           |
| 197/692 | 4482/16404  | PASS | 0.166666667<br>0.11627907                             |
| 6/682   | 59/16132    | PASS | 0.136363636<br>0.121794872                            |

VEP annotated somatic variants

|         |             |      |             |
|---------|-------------|------|-------------|
|         |             |      | 0.315789474 |
| 438/694 | 8896/16404  | PASS | 0.105263158 |
| 130/686 | 3499/16394  | PASS | 0.173913043 |
| 158/694 | 2721/16404  | PASS | 0.136       |
|         |             |      | 0.333333333 |
| 170/694 | 1858/16408  | PASS | 0.218181818 |
|         |             |      | 0.214285714 |
| 405/438 | 8315/8434   | PASS | 0.260869565 |
| 6/692   | 73/16384    | PASS | 0.143939394 |
|         |             |      | 0.222222222 |
|         |             |      | 0.117647059 |
| 12/678  | 68/16040    | PASS | 0.113475177 |
| 90/594  | 353/9828    | PASS | 0.125       |
| 370/686 | 7817/16348  | PASS | 0.155172414 |
|         |             |      | 0.111111111 |
|         |             |      | 0.2         |
|         |             |      | 0.210526316 |
| 471/618 | 10369/14706 | PASS | 0.154761905 |
| 81/688  | 1946/15848  | PASS | 0.333333333 |
| 171/584 | 2870/12614  | PASS | 0.204081633 |
| 175/692 | 3069/16274  | PASS | 0.103092784 |
| 178/438 | 1988/5620   | PASS | 0.15        |
|         |             |      | 0.109090909 |
|         |             |      | 0.192982456 |
| 216/694 | 6612/16282  | PASS | 0.153333333 |
| 263/694 | 6648/16400  | PASS | 0.121212121 |
| 284/694 | 6708/16404  | PASS | 0.112676056 |
| 229/652 | 5264/15328  | PASS | 0.117647059 |
|         |             |      | 0.1         |
| 90/436  | 2794/11596  | PASS | 0.102040816 |
| 29/114  | 1609/7528   | PASS | 0.136363636 |
| 43/680  | 652/15580   | PASS | 0.133333333 |
|         |             |      | 0.133333333 |
| 32/658  | 1677/14112  | PASS | 0.285714286 |
|         |             |      | 0.1875      |
| 2/656   | 47/15568    | PASS | 0.150943396 |
|         |             |      | 0.2         |
| 58/444  | 1938/9547   | PASS | 0.236363636 |
| 268/686 | 5061/16298  | PASS | 0.217391304 |
| 233/690 | 4933/16406  | PASS | 0.127272727 |
| 232/680 | 4819/16236  | PASS | 0.12244898  |
| 13/690  | 89/16292    | PASS | 0.1         |
|         |             |      | 0.230769231 |
| 85/688  | 1908/16264  | PASS | 0.12        |
|         |             |      | 0.153846154 |
| 1/672   | 1/15900     | PASS | 0.137614679 |
|         |             |      | 0.142857143 |
| 6/558   | 415/13698   | PASS | 0.105263158 |
| 127/690 | 5012/16402  | PASS | 0.163934426 |
|         |             |      | 0.103448276 |
|         |             |      | 0.136363636 |
|         |             |      | 0.103448276 |
|         |             |      | 0.142857143 |
| 61/600  | 1906/12586  | PASS | 0.151515152 |
| 271/688 | 6780/16314  | PASS | 0.111111111 |

VEP annotated somatic variants

|         |             |                       |             |
|---------|-------------|-----------------------|-------------|
| 134/694 | 2381/16408  | PASS                  | 0.153846154 |
| 0/664   | 37/15530    | SRTrancheSNP99.60to99 | 0.179487179 |
|         |             |                       | 0.130434783 |
|         |             |                       | 0.130434783 |
|         |             |                       | 0.104651163 |
| 42/60   | 2692/3676   | PASS                  | 0.163120567 |
| 537/690 | 12968/16398 | PASS                  | 0.148148148 |
| 104/184 | 3699/7896   | PASS                  | 0.186046512 |
|         |             |                       | 0.111111111 |
|         |             |                       | 0.155555556 |
|         |             |                       | 0.111111111 |
| 143/524 | 2142/8454   | PASS                  | 0.101351351 |
|         |             |                       | 0.3         |
| 513/678 | 12029/15732 | PASS                  | 0.113043478 |
| 478/664 | 11499/15342 | PASS                  | 0.136363636 |
| 509/678 | 12616/16392 | PASS                  | 0.173333333 |
| 27/690  | 595/16322   | PASS                  | 0.126213592 |
|         |             |                       | 0.210526316 |
|         |             |                       | 0.104166667 |
|         |             |                       | 0.134615385 |
| 541/694 | 14263/16404 | PASS                  | 0.126760563 |
| 424/686 | 10770/16294 | PASS                  | 0.193548387 |
|         |             |                       | 0.181818182 |
|         |             |                       | 0.139534884 |
| 174/428 | 5014/12650  | PASS                  | 0.2         |
| 283/694 | 6623/16406  | PASS                  | 0.13253012  |
|         |             |                       | 0.157894737 |
|         |             |                       | 1           |
|         |             |                       | 0.14        |
|         |             |                       | 0.166666667 |
| 457/648 | 10568/16184 | PASS                  | 0.11827957  |
| 177/642 | 4248/14846  | PASS                  | 0.109589041 |
|         |             |                       | 0.115384615 |
| 17/60   | 1452/4036   | PASS                  | 0.113924051 |
|         |             |                       | 0.2         |
| 143/554 | 2748/9026   | PASS                  | 0.149253731 |
|         |             |                       | 0.142857143 |
|         |             |                       | 0.1875      |
| 170/326 | 4050/7314   | PASS                  | 0.203703704 |
| 0/68    | 1/4072      | PASS                  | 0.125       |
| 123/552 | 4496/13776  | PASS                  | 0.139344262 |
| 170/688 | 2662/16180  | PASS                  | 0.129032258 |
|         |             |                       | 0.115384615 |
| 369/682 | 8215/16222  | PASS                  | 0.106060606 |
| 41/522  | 491/11282   | PASS                  | 0.150943396 |
| 0/694   | 0/16400     | PASS                  | 0.208053691 |
|         |             |                       | 0.15625     |
| 261/690 | 8292/16260  | PASS                  | 0.166666667 |
|         |             |                       | 0.166666667 |
| 251/692 | 6856/16146  | PASS                  | 0.122641509 |
| 15/684  | 58/16334    | PASS                  | 0.131578947 |
|         |             |                       | 0.130434783 |
| 67/694  | 1567/16404  | PASS                  | 0.176470588 |
| 12/512  | 137/12462   | PASS                  | 0.119047619 |
|         |             |                       | 0.117647059 |

VEP annotated somatic variants

|         |             |      |             |
|---------|-------------|------|-------------|
|         |             |      | 0.159090909 |
|         |             |      | 0.15        |
|         |             |      | 0.111111111 |
|         |             |      | 0.13559322  |
|         |             |      | 0.130434783 |
| 139/170 | 6015/7608   | PASS | 0.126696833 |
| 272/568 | 3313/8808   | PASS | 0.333333333 |
| 29/484  | 1159/10048  | PASS | 0.194444444 |
| 518/692 | 11297/16270 | PASS | 0.161764706 |
|         |             |      | 0.169491525 |
| 199/469 | 5574/10027  | PASS | 0.102189781 |
|         |             |      | 0.136363636 |
| 73/408  | 1441/6358   | PASS | 0.12962963  |
| 321/467 | 7013/10040  | PASS | 0.2         |
|         |             |      | 0.12        |
|         |             |      | 0.166666667 |
| 4/12    | 64/296      | PASS | 0.2         |
| 267/654 | 4991/13828  | PASS | 0.150684932 |
| 172/692 | 2080/16320  | PASS | 0.109756098 |
| 337/694 | 8321/16406  | PASS | 0.12849162  |
|         |             |      | 0.129533679 |
| 400/445 | 8197/9594   | PASS | 0.134146341 |
|         |             |      | 0.342105263 |
| 7/570   | 39/14004    | PASS | 0.147540984 |
|         |             |      | 0.12        |
|         |             |      | 0.106382979 |
|         |             |      | 0.127388535 |
| 215/694 | 7217/16408  | PASS | 0.119565217 |
| 134/416 | 1529/7106   | PASS | 0.142857143 |
| 168/482 | 3917/8450   | PASS | 0.103092784 |
| 34/694  | 964/16374   | PASS | 0.222222222 |
| 282/692 | 6125/16374  | PASS | 0.102941176 |
| 117/648 | 2806/15210  | PASS | 0.147727273 |
|         |             |      | 0.153846154 |
|         |             |      | 0.153846154 |
| 0/469   | 1/10047     | PASS | 0.114285714 |
|         |             |      | 0.114285714 |
| 428/686 | 8889/16320  | PASS | 0.152777778 |
|         |             |      | 0.108695652 |
| 2/694   | 106/16404   | PASS | 0.112903226 |
|         |             |      | 0.176470588 |
| 1/358   | 0/11250     | PASS | 0.148148148 |
|         |             |      | 0.14084507  |
|         |             |      | 0.137254902 |
| 65/674  | 1203/14780  | PASS | 0.166666667 |
| 107/406 | 2035/10904  | PASS | 0.225       |
| 73/662  | 1620/16118  | PASS | 0.147651007 |
| 174/694 | 4046/16280  | PASS | 0.157894737 |
|         |             |      | 0.125       |
| 115/692 | 3598/16408  | PASS | 0.122807018 |
| 103/692 | 2446/16282  | PASS | 0.139534884 |
| 77/174  | 2952/7878   | PASS | 0.222222222 |
|         |             |      | 0.151515152 |
| 291/676 | 5717/14962  | PASS | 0.106666667 |
|         |             |      | 0.162162162 |

VEP annotated somatic variants

|         |             |      |             |
|---------|-------------|------|-------------|
| 1/16    | 21/518      | PASS | 0.154761905 |
|         |             |      | 0.125714286 |
| 295/688 | 7429/15352  | PASS | 0.318181818 |
|         |             |      | 0.12        |
| 163/668 | 4698/15984  | PASS | 0.11038961  |
| 230/682 | 5404/16026  | PASS | 0.178082192 |
| 9/144   | 322/7770    | PASS | 0.108108108 |
| 3/648   | 71/15806    | PASS | 0.139072848 |
|         |             |      | 0.3125      |
| 238/466 | 7162/9994   | PASS | 0.295454545 |
| 57/118  | 3809/7486   | PASS | 0.103448276 |
| 495/694 | 13341/16404 | PASS | 0.104166667 |
| 118/212 | 6382/10130  | PASS | 0.12        |
| 277/688 | 8596/16408  | PASS | 0.196078431 |
| 584/690 | 15154/16408 | PASS | 0.175824176 |
| 252/636 | 8457/15826  | PASS | 0.15862069  |
| 271/692 | 6249/16304  | PASS | 0.106666667 |
|         |             |      | 0.176470588 |
| 12/680  | 110/16332   | PASS | 0.191709845 |
|         |             |      | 0.13559322  |
| 172/498 | 2141/11652  | PASS | 0.205882353 |
|         |             |      | 0.125       |
|         |             |      | 0.135135135 |
| 142/694 | 2663/16394  | PASS | 0.184615385 |
| 266/694 | 5319/16408  | PASS | 0.184210526 |
| 453/694 | 11860/16404 | PASS | 0.126126126 |
| 270/684 | 5178/16336  | PASS | 0.150943396 |
| 406/682 | 10289/16286 | PASS | 0.116883117 |
|         |             |      | 0.133333333 |
| 210/688 | 7376/16366  | PASS | 0.127659574 |
| 221/688 | 4994/16402  | PASS | 0.105263158 |
| 22/166  | 805/7558    | PASS | 0.148148148 |
|         |             |      | 0.121621622 |
| 379/690 | 10202/16406 | PASS | 0.143939394 |
|         |             |      | 0.117647059 |
| 273/448 | 6127/9641   | PASS | 0.133333333 |
| 70/130  | 3875/7772   | PASS | 0.116129032 |
| 263/364 | 8154/11394  | PASS | 0.19047619  |
| 158/694 | 3597/16408  | PASS | 0.1625      |
| 151/686 | 1576/16382  | PASS | 0.105263158 |
| 81/694  | 696/16408   | PASS | 0.105263158 |
|         |             |      | 0.3         |
| 186/580 | 2877/11836  | PASS | 0.169230769 |
| 0/606   | 0/15370     | PASS | 0.142857143 |
| 435/692 | 7821/16400  | PASS | 0.217391304 |
|         |             |      | 0.136363636 |
|         |             |      | 0.1         |
|         |             |      | 0.222222222 |
|         |             |      | 0.109090909 |
|         |             |      | 0.12        |
|         |             |      | 0.118644068 |
| 285/544 | 4289/9110   | PASS | 0.15        |
| 8/694   | 146/16406   | PASS | 0.161290323 |
|         |             |      | 0.127272727 |
|         |             |      | 0.142857143 |

VEP annotated somatic variants

|         |             |      |             |
|---------|-------------|------|-------------|
| 92/686  | 2850/16402  | PASS | 0.107142857 |
|         |             |      | 0.111111111 |
|         |             |      | 0.130434783 |
| 35/682  | 685/16386   | PASS | 0.136363636 |
| 305/692 | 7495/16400  | PASS | 0.133333333 |
| 338/694 | 9304/16402  | PASS | 0.118811881 |
| 227/496 | 7630/14102  | PASS | 0.171875    |
| 241/640 | 6542/12412  | PASS | 0.137931034 |
| 244/612 | 8035/15252  | PASS | 0.12        |
| 256/672 | 8182/16194  | PASS | 0.12        |
| 32/660  | 903/15694   | PASS | 0.12195122  |
| 6/670   | 11/14798    | PASS | 0.222222222 |
|         |             |      | 0.136363636 |
| 5/690   | 63/15944    | PASS | 0.18        |
| 281/690 | 6063/16282  | PASS | 0.109589041 |
| 337/622 | 4856/11652  | PASS | 0.266666667 |
| 95/694  | 1733/16408  | PASS | 0.112676056 |
|         |             |      | 0.230769231 |
| 513/664 | 9930/15572  | PASS | 0.130434783 |
|         |             |      | 0.101265823 |
| 36/136  | 2557/7904   | PASS | 0.115384615 |
| 257/692 | 4891/16394  | PASS | 0.15625     |
| 160/606 | 3436/12062  | PASS | 0.115384615 |
| 6/690   | 206/16402   | PASS | 0.235294118 |
| 4/684   | 65/15572    | PASS | 0.108695652 |
|         |             |      | 0.15        |
| 415/692 | 8430/15824  | PASS | 0.153846154 |
| 40/440  | 1222/14174  | PASS | 0.271186441 |
| 61/178  | 3161/7390   | PASS | 0.161290323 |
|         |             |      | 0.131578947 |
|         |             |      | 0.157894737 |
|         |             |      | 0.12        |
| 305/572 | 6252/13660  | PASS | 0.2         |
|         |             |      | 0.1         |
|         |             |      | 0.135416667 |
| 0/56    | 10/3318     | PASS | 0.118421053 |
| 5/172   | 11/4234     | PASS | 0.183908046 |
| 5/86    | 25/4717     | PASS | 0.294117647 |
| 278/534 | 2800/7574   | PASS | 0.12        |
|         |             |      | 0.269230769 |
| 136/684 | 5031/16142  | PASS | 0.184782609 |
| 10/308  | 124/9630    | PASS | 0.115384615 |
| 19/688  | 449/16134   | PASS | 0.133333333 |
| 231/682 | 5724/16222  | PASS | 0.103896104 |
|         |             |      | 0.127906977 |
| 77/692  | 2720/16360  | PASS | 0.116751269 |
| 8/452   | 31/12168    | PASS | 0.125       |
|         |             |      | 0.228571429 |
| 494/694 | 13496/16408 | PASS | 0.116071429 |
|         |             |      | 0.107142857 |
| 3/18    | 217/690     | PASS | 0.266666667 |
|         |             |      | 0.185185185 |
| 112/690 | 2569/16404  | PASS | 0.135135135 |
| 38/386  | 1348/12002  | PASS | 0.131147541 |
| 179/694 | 6545/16406  | PASS | 0.136363636 |

VEP annotated somatic variants

|         |             |      |             |
|---------|-------------|------|-------------|
|         |             |      | 0.117647059 |
|         |             |      | 0.208333333 |
|         |             |      | 0.166666667 |
|         |             |      | 0.142857143 |
| 47/694  | 1557/16406  | PASS | 0.12        |
| 433/692 | 10430/16386 | PASS | 0.1         |
| 15/688  | 146/16286   | PASS | 0.12195122  |
| 17/118  | 1481/7460   | PASS | 0.128205128 |
| 102/694 | 2299/16406  | PASS | 0.189189189 |
|         |             |      | 0.15        |
| 14/184  | 996/7898    | PASS | 0.1         |
|         |             |      | 0.121212121 |
| 148/666 | 3625/16136  | PASS | 0.214285714 |
| 281/694 | 6603/16404  | PASS | 0.144144144 |
|         |             |      | 0.105263158 |
|         |             |      | 0.166666667 |
| 112/684 | 1771/16152  | PASS | 0.12345679  |
|         |             |      | 0.275862069 |
| 356/692 | 10481/16400 | PASS | 0.152173913 |
| 323/443 | 5778/8114   | PASS | 0.136363636 |
|         |             |      | 0.238095238 |
|         |             |      | 0.14084507  |
|         |             |      | 0.138888889 |
| 106/364 | 2383/8638   | PASS | 0.113636364 |
|         |             |      | 0.266666667 |
| 22/676  | 893/15886   | PASS | 0.114942529 |
| 162/550 | 6508/14874  | PASS | 0.161764706 |
|         |             |      | 0.285714286 |
|         |             |      | 0.230769231 |
| 437/694 | 8929/16406  | PASS | 0.142857143 |
| 40/694  | 625/16406   | PASS | 0.109090909 |
| 39/678  | 586/15776   | PASS | 0.113636364 |
| 25/338  | 255/4694    | PASS | 0.125       |
| 178/694 | 3824/16392  | PASS | 0.109756098 |
| 198/692 | 4414/16402  | PASS | 0.188405797 |
| 543/692 | 11918/16404 | PASS | 0.175       |
| 23/692  | 180/16394   | PASS | 0.129032258 |
| 107/654 | 1630/15508  | PASS | 0.136363636 |
|         |             |      | 0.12        |
|         |             |      | 0.118644068 |
| 110/612 | 2609/11204  | PASS | 0.140350877 |
| 139/616 | 3118/11708  | PASS | 0.114427861 |
|         |             |      | 0.125       |
| 29/634  | 494/15044   | PASS | 0.107142857 |
| 205/694 | 6026/16404  | PASS | 0.118644068 |
| 83/457  | 3257/9947   | PASS | 0.121495327 |
| 122/694 | 1560/16408  | PASS | 0.13253012  |
|         |             |      | 0.113207547 |
| 35/640  | 237/14512   | PASS | 0.1         |
| 110/267 | 2534/6576   | PASS | 0.194444444 |
| 10/684  | 26/16292    | PASS | 0.128571429 |
|         |             |      | 0.2         |
| 76/232  | 4265/9222   | PASS | 0.184210526 |
| 245/694 | 4011/16316  | PASS | 0.104294479 |
|         |             | PASS | 0.166666667 |

VEP annotated somatic variants

|         |            |      |             |
|---------|------------|------|-------------|
| 123/672 | 3100/16264 | PASS | 0.112359551 |
| 89/678  | 2710/16056 | PASS | 0.153846154 |
| 8/694   | 52/16406   | PASS | 0.16        |
|         |            |      | 0.133333333 |
| 72/694  | 992/16398  | PASS | 0.126582278 |
| 122/686 | 1954/16210 | PASS | 0.176470588 |
| 0/684   | 0/15890    | PASS | 0.133333333 |
|         |            |      | 0.16        |
| 315/694 | 7924/16334 | PASS | 0.223880597 |
| 4/692   | 0/16370    | PASS | 0.159663866 |
| 310/638 | 9069/16020 | PASS | 0.172839506 |
|         |            |      | 0.194444444 |
| 191/674 | 5650/15410 | PASS | 0.113207547 |
| 101/694 | 2168/16404 | PASS | 0.141414141 |
|         |            |      | 0.333333333 |
| 232/666 | 5278/16190 | PASS | 0.222222222 |
| 232/678 | 5153/14952 | PASS | 0.142857143 |
|         |            |      | 0.114285714 |
| 100/232 | 2890/6672  | PASS | 0.148648649 |
| 235/678 | 5880/15566 | PASS | 0.102564103 |
| 27/80   | 1429/5300  | PASS | 0.170212766 |
| 168/690 | 3157/16396 | PASS | 0.104166667 |
|         |            |      | 0.157894737 |
| 100/694 | 3568/16406 | PASS | 0.113821138 |
| 108/694 | 3629/16408 | PASS | 0.100671141 |
| 94/308  | 1904/10154 | PASS | 0.139534884 |
|         |            |      | 0.125       |
|         |            |      | 0.269230769 |
|         |            |      | 0.166666667 |
|         |            |      | 0.125       |
|         |            |      | 0.15625     |
| 150/664 | 3718/16320 | PASS | 0.107142857 |
| 268/694 | 4644/16372 | PASS | 0.105263158 |
| 235/690 | 2849/16094 | PASS | 0.222222222 |
|         |            |      | 0.125       |
|         |            |      | 0.176470588 |
|         |            |      | 0.224137931 |
| 128/690 | 1692/16408 | PASS | 0.12195122  |
| 223/646 | 5248/13178 | PASS | 0.147540984 |
|         |            |      | 0.15        |
| 130/690 | 1822/16338 | PASS | 0.127659574 |
| 54/694  | 1240/16408 | PASS | 0.102272727 |
| 185/690 | 2585/16372 | PASS | 0.102040816 |
|         |            |      | 0.230769231 |
| 146/292 | 6010/10752 | PASS | 0.115384615 |
| 273/666 | 6255/13750 | PASS | 0.146341463 |
| 82/457  | 1545/10008 | PASS | 0.2375      |
| 190/404 | 4981/9678  | PASS | 0.115384615 |
|         |            |      | 0.125       |
|         |            |      | 0.166666667 |
|         |            |      | 0.115384615 |
| 102/622 | 2244/12210 | PASS | 0.138461538 |
|         |            |      | 0.142857143 |
| 47/690  | 645/16406  | PASS | 0.210526316 |
| 317/690 | 6971/16406 | PASS | 0.133333333 |



VEP annotated somatic variants

|         |             |                        |             |
|---------|-------------|------------------------|-------------|
| 179/688 | 3398/16338  | PASS                   | 0.130434783 |
| 205/690 | 4343/16406  | PASS                   | 0.127659574 |
| 438/654 | 10680/16304 | PASS                   | 0.210526316 |
| 289/690 | 5906/16404  | PASS                   | 0.136986301 |
| 264/692 | 5660/16408  | PASS                   | 0.125       |
| 41/100  | 2596/6244   | PASS                   | 0.144508671 |
| 271/688 | 5890/16316  | PASS                   | 0.124352332 |
| 265/614 | 5832/15862  | PASS                   | 0.125       |
| 287/684 | 6048/16342  | PASS                   | 0.217877095 |
| 110/378 | 3073/10206  | PASS                   | 0.12962963  |
| 199/324 | 4712/7866   | PASS                   | 0.127388535 |
| 43/118  | 3422/7508   | PASS                   | 0.157894737 |
| 22/94   | 1876/5496   | ¡RTrancheINDEL96.00to9 | 0.25        |
| 167/686 | 2562/16368  | PASS                   | 0.157894737 |
| 209/688 | 4514/16156  | PASS                   | 0.126760563 |
| 222/676 | 7644/15756  | PASS                   | 0.113043478 |
| 24/118  | 1154/7478   | PASS                   | 0.111111111 |
| 10/22   | 308/632     | PASS                   | 0.3125      |
| 40/208  | 528/9170    | PASS                   | 0.151515152 |
| 95/530  | 1289/13338  | PASS                   | 0.142857143 |
| 72/694  | 1966/16400  | PASS                   | 0.12345679  |
| 93/694  | 2361/16406  | PASS                   | 0.149253731 |
| 395/652 | 9375/16156  | PASS                   | 0.100478469 |
| 266/466 | 7480/13550  | PASS                   | 0.25        |
| 249/692 | 5941/16404  | PASS                   | 0.214285714 |
| 157/546 | 2873/9040   | PASS                   | 0.136363636 |
| 129/670 | 3383/15730  | ¡RTrancheINDEL99.00to9 | 0.125       |
| 292/467 | 7328/9970   | PASS                   | 0.25        |
| 255/684 | 5917/16308  | PASS                   | 0.130434783 |
| 239/416 | 5168/8376   | PASS                   | 0.114285714 |
| 258/460 | 5800/9961   | PASS                   | 0.272727273 |
| 258/459 | 5800/9961   | PASS                   | 0.272727273 |
| 45/136  | 3225/8028   | PASS                   | 0.238095238 |
| 293/692 | 7500/16266  | PASS                   | 0.15        |
| 240/626 | 3733/12338  | PASS                   | 0.103448276 |
| 182/626 | 2984/11588  | PASS                   | 0.272727273 |
| 88/154  | 1865/4904   | PASS                   | 0.228571429 |
| 8/84    | 67/2734     | PASS                   | 0.228571429 |
| 2/6     | 45/166      | PASS                   | 0.228571429 |
|         |             |                        | 0.208333333 |
|         |             |                        | 0.208333333 |
|         |             |                        | 0.162162162 |
|         |             |                        | 0.161290323 |
|         |             |                        | 0.125       |
|         |             |                        | 0.144927536 |
|         |             |                        | 0.121212121 |
|         |             |                        | 0.128787879 |
|         |             |                        | 0.16        |
|         |             |                        | 0.122807018 |
|         |             |                        | 0.173913043 |
|         |             |                        | 0.111111111 |
|         |             |                        | 0.142857143 |

VEP annotated somatic variants

|         |            |                       |  |             |
|---------|------------|-----------------------|--|-------------|
|         |            |                       |  | 0.129032258 |
| 57/646  | 2176/13320 | SRTrancheSNP99.60to99 |  | 0.127659574 |
|         |            |                       |  | 0.1625      |
| 41/686  | 728/16234  | PASS                  |  | 0.107438017 |
| 146/676 | 3381/16086 | PASS                  |  | 0.272727273 |
|         |            |                       |  | 0.114285714 |
| 230/546 | 3620/14172 | PASS                  |  | 0.111111111 |
|         |            |                       |  | 0.206896552 |
| 47/646  | 453/15222  | PASS                  |  | 0.104166667 |
|         |            |                       |  | 0.333333333 |
| 375/680 | 9326/16282 | PASS                  |  | 0.266666667 |
|         |            |                       |  | 0.166666667 |
| 146/690 | 2412/16402 | PASS                  |  | 0.114551084 |
|         |            |                       |  | 0.25        |
| 4/690   | 36/16376   | PASS                  |  | 0.333333333 |
|         |            |                       |  | 0.176470588 |
| 5/694   | 37/16408   | PASS                  |  | 0.158536585 |
| 4/544   | 33/10648   | PASS                  |  | 0.132352941 |
|         |            |                       |  | 0.115384615 |
| 172/334 | 5071/10976 | PASS                  |  | 0.153846154 |
| 152/314 | 6368/11000 | PASS                  |  | 0.118421053 |
| 142/688 | 4799/16118 | PASS                  |  | 0.203389831 |
| 163/682 | 3462/16362 | PASS                  |  | 0.126760563 |
| 433/454 | 9686/9786  | PASS                  |  | 0.212765957 |
|         |            |                       |  | 0.153846154 |
| 302/690 | 9505/16404 | PASS                  |  | 0.213483146 |
|         |            |                       |  | 0.147651007 |
| 217/686 | 3800/16046 | PASS                  |  | 0.12        |
| 146/668 | 5321/16364 | PASS                  |  | 0.179245283 |
| 252/694 | 3260/16394 | PASS                  |  | 0.151785714 |
|         |            |                       |  | 0.2         |
| 170/210 | 6916/9308  | PASS                  |  | 0.147058824 |
| 182/666 | 5076/16154 | PASS                  |  | 0.127118644 |
| 158/218 | 7349/9452  | PASS                  |  | 0.111111111 |
| 0/120   | 1/7338     | PASS                  |  | 0.125       |
| 0/377   | 0/8139     | PASS                  |  | 0.137931034 |
| 324/688 | 8452/16050 | PASS                  |  | 0.127272727 |
|         |            |                       |  | 0.15        |
|         |            |                       |  | 0.170212766 |
| 250/694 | 6049/16404 | PASS                  |  | 0.161764706 |
|         |            |                       |  | 0.109090909 |
|         |            |                       |  | 0.357142857 |
| 86/692  | 1242/16336 | PASS                  |  | 0.111111111 |
| 107/644 | 2750/13598 | PASS                  |  | 0.152173913 |
| 399/690 | 7875/16394 | PASS                  |  | 0.103448276 |
|         |            |                       |  | 0.186440678 |
| 391/692 | 9168/16402 | PASS                  |  | 0.107526882 |
| 195/692 | 4482/16314 | PASS                  |  | 0.115384615 |
| 354/694 | 7097/16406 | PASS                  |  | 0.162162162 |
|         |            |                       |  | 0.135416667 |
| 304/658 | 6372/15170 | PASS                  |  | 0.129032258 |
| 444/680 | 8979/14936 | PASS                  |  | 0.120689655 |
| 106/148 | 5342/8254  | PASS                  |  | 0.12        |
|         |            |                       |  | 0.108108108 |
|         |            |                       |  | 0.12037037  |

VEP annotated somatic variants

|         |             |      |                                                                         |
|---------|-------------|------|-------------------------------------------------------------------------|
| 111/306 | 4485/9536   | PASS | 0.125<br>0.178571429<br>0.102564103<br>0.157894737<br>0.135135135       |
| 209/406 | 5275/10878  | PASS | 0.115384615                                                             |
| 368/690 | 7255/15924  | PASS | 0.116883117<br>0.104477612                                              |
| 304/694 | 8227/16404  | PASS | 0.135135135                                                             |
| 7/586   | 69/14596    | PASS | 0.101694915<br>0.117647059<br>0.137254902                               |
| 290/640 | 7731/14274  | PASS | 0.108108108<br>0.115384615                                              |
| 239/694 | 5606/16378  | PASS | 0.153846154                                                             |
| 42/118  | 1794/7392   | PASS | 0.169354839                                                             |
| 161/644 | 3784/15876  | PASS | 0.25<br>0.111111111<br>0.111111111                                      |
| 292/686 | 6120/16342  | PASS | 0.166666667                                                             |
| 289/456 | 3673/9631   | PASS | 0.142857143<br>0.16<br>0.24                                             |
| 13/30   | 235/690     | PASS | 0.103174603                                                             |
| 133/304 | 3336/10086  | PASS | 0.203389831                                                             |
| 429/682 | 10795/16036 | PASS | 0.12                                                                    |
| 445/694 | 11076/16378 | PASS | 0.118181818                                                             |
| 177/624 | 3511/11706  | PASS | 0.114285714                                                             |
| 115/690 | 1652/16152  | PASS | 0.129411765                                                             |
| 561/694 | 11930/16406 | PASS | 0.155555556                                                             |
| 251/616 | 7459/13910  | PASS | 0.109375                                                                |
| 69/666  | 1999/16206  | PASS | 0.214285714                                                             |
| 406/688 | 7864/15980  | PASS | 0.105882353                                                             |
| 277/694 | 8872/16404  | PASS | 0.111111111                                                             |
| 101/686 | 3625/16294  | PASS | 0.148148148                                                             |
| 0/688   | 44/16390    | PASS | 0.123076923                                                             |
| 0/344   | 1/11008     | PASS | 0.105263158                                                             |
| 368/664 | 7441/15554  | PASS | 0.25<br>0.151515152<br>0.12987013<br>0.5<br>0.12                        |
| 345/690 | 7549/16404  | PASS | 0.106382979                                                             |
| 299/692 | 5439/16214  | PASS | 0.111111111                                                             |
| 199/694 | 5408/16406  | PASS | 0.108695652<br>0.115384615<br>0.128571429<br>0.152542373<br>0.130434783 |
| 55/144  | 2912/7692   | PASS | 0.14516129<br>0.137931034                                               |
| 273/690 | 5582/16322  | PASS | 0.130434783                                                             |
| 159/180 | 7342/7896   | PASS | 0.18627451<br>0.195652174                                               |
| 161/184 | 6685/7920   | PASS | 0.125                                                                   |

VEP annotated somatic variants

|         |             |      |                                                                                                             |
|---------|-------------|------|-------------------------------------------------------------------------------------------------------------|
| 346/392 | 9247/10908  | PASS | 0.176470588<br>0.157894737<br>0.153846154                                                                   |
| 1/312   | 0/6520      | PASS | 0.134615385                                                                                                 |
| 1/180   | 62/7902     | PASS | 0.180851064                                                                                                 |
| 41/166  | 1683/7358   | PASS | 0.27027027                                                                                                  |
| 77/694  | 702/16406   | PASS | 0.101694915                                                                                                 |
| 209/662 | 5735/15320  | PASS | 0.102564103<br>1<br>0.230769231                                                                             |
| 149/694 | 3701/16378  | PASS | 0.146788991                                                                                                 |
| 150/690 | 3677/16222  | PASS | 0.130434783<br>0.157894737                                                                                  |
| 30/690  | 304/16318   | PASS | 0.102040816                                                                                                 |
| 73/686  | 1428/15974  | PASS | 0.155555556<br>0.12195122                                                                                   |
| 349/690 | 7231/16376  | PASS | 0.129032258                                                                                                 |
| 326/656 | 6000/13340  | PASS | 0.106382979<br>0.2<br>0.191489362<br>0.129032258<br>0.12195122<br>0.133333333<br>0.117647059<br>0.142857143 |
| 69/616  | 575/14658   | PASS | 0.109947644<br>0.12962963                                                                                   |
| 2/636   | 24/15640    | PASS | 0.13559322                                                                                                  |
| 237/678 | 5067/15988  | PASS | 0.181818182                                                                                                 |
| 23/40   | 1682/2592   | PASS | 0.142857143<br>0.111111111                                                                                  |
| 5/126   | 163/6218    | PASS | 0.102564103                                                                                                 |
| 159/644 | 2552/12980  | PASS | 0.195121951                                                                                                 |
| 148/682 | 2166/15348  | PASS | 0.144859813<br>0.257142857                                                                                  |
| 75/694  | 2180/16370  | PASS | 0.126213592                                                                                                 |
| 405/688 | 10818/16366 | PASS | 0.111111111<br>0.125786164<br>0.162162162<br>0.125                                                          |
| 45/122  | 2395/7604   | PASS | 0.106761566<br>0.428571429                                                                                  |
| 60/686  | 576/15836   | PASS | 0.164383562                                                                                                 |
| 0/120   | 0/7090      | PASS | 0.126213592                                                                                                 |
| 129/628 | 1455/11876  | PASS | 0.244186047<br>0.130434783                                                                                  |
| 134/668 | 2556/15930  | PASS | 0.153846154                                                                                                 |
| 65/113  | 3307/5314   | PASS | 0.172413793                                                                                                 |
| 102/650 | 3971/16250  | PASS | 0.210526316                                                                                                 |
| 98/452  | 3732/12862  | PASS | 0.125                                                                                                       |
| 176/310 | 7302/11522  | PASS | 0.230769231<br>0.166666667                                                                                  |
| 557/694 | 13879/16408 | PASS | 0.132352941<br>0.2                                                                                          |
| 12/690  | 1723/16340  | PASS | 0.176470588                                                                                                 |

VEP annotated somatic variants

|         |             |      |             |
|---------|-------------|------|-------------|
|         |             |      | 0.111111111 |
|         |             |      | 0.178571429 |
|         |             |      | 0.183333333 |
|         |             |      | 0.103448276 |
|         |             |      | 0.131578947 |
| 258/670 | 7894/15726  | PASS | 0.173076923 |
| 547/694 | 14479/16214 | PASS | 0.275       |
|         |             |      | 0.5         |
|         |             |      | 0.101265823 |
| 50/344  | 1163/10130  | PASS | 0.125       |
|         |             |      | 0.107142857 |
| 183/694 | 2805/16394  | PASS | 0.202614379 |
|         |             |      | 0.222222222 |
| 147/694 | 2054/16396  | PASS | 0.138888889 |
|         |             |      | 0.217391304 |
| 180/688 | 6630/16402  | PASS | 0.1875      |
|         |             |      | 0.12        |
| 75/678  | 1755/16304  | PASS | 0.177777778 |
| 345/692 | 7544/16228  | PASS | 0.123287671 |
| 71/694  | 1497/16404  | PASS | 0.107142857 |
| 184/286 | 5385/7482   | PASS | 0.153846154 |
|         |             |      | 0.4         |
|         |             |      | 0.111111111 |
|         |             |      | 0.375       |
|         |             |      | 0.121212121 |
| 161/694 | 3292/16408  | PASS | 0.142857143 |
|         |             |      | 0.113636364 |
| 9/690   | 7/16142     | PASS | 0.119047619 |
|         |             |      | 0.25        |
| 133/276 | 4433/9558   | PASS | 0.129411765 |
| 364/694 | 9080/16408  | PASS | 0.150684932 |
| 54/670  | 2392/14974  | PASS | 0.1         |
| 66/469  | 1635/10047  | PASS | 0.15        |
|         |             |      | 0.107142857 |
|         |             |      | 0.2         |
|         |             |      | 0.117647059 |
| 23/642  | 194/15780   | PASS | 0.102564103 |
| 35/394  | 1911/12514  | PASS | 0.142857143 |
|         |             |      | 0.107142857 |
|         |             |      | 0.105263158 |
| 3/694   | 68/16404    | PASS | 0.136363636 |
| 106/630 | 1590/15040  | PASS | 0.137931034 |
| 210/614 | 4652/15512  | PASS | 0.1375      |
| 120/280 | 3691/9954   | PASS | 0.104761905 |
|         |             |      | 0.1875      |
| 15/618  | 52/15106    | PASS | 0.186046512 |
|         |             |      | 0.176470588 |
| 513/644 | 10739/13898 | PASS | 0.109489051 |
|         |             |      | 0.5         |
| 189/692 | 4883/16190  | PASS | 0.144       |
|         |             |      | 0.130434783 |
| 120/690 | 1821/16126  | PASS | 0.15        |
|         |             |      | 0.157894737 |
|         |             |      | 0.136363636 |
|         |             |      | 0.428571429 |

VEP annotated somatic variants

|         |             |      |             |
|---------|-------------|------|-------------|
| 117/652 | 3617/14542  | PASS | 0.210526316 |
| 220/328 | 7126/11298  | PASS | 0.111111111 |
| 179/320 | 4978/10996  | PASS | 0.14893617  |
|         |             |      | 0.103448276 |
| 1/94    | 7/4982      | PASS | 0.166666667 |
| 164/694 | 7484/16308  | PASS | 0.128       |
|         |             |      | 0.127272727 |
|         |             |      | 0.173913043 |
| 455/686 | 10264/16382 | PASS | 0.166666667 |
|         |             |      | 0.125       |
|         |             |      | 0.129032258 |
| 176/692 | 4210/16396  | PASS | 0.127272727 |
| 382/694 | 9558/16408  | PASS | 0.158415842 |
|         |             |      | 0.454545455 |
| 299/690 | 7791/16338  | PASS | 0.131578947 |
| 149/678 | 5432/16074  | PASS | 0.128205128 |
|         |             |      | 0.185185185 |
| 74/162  | 2515/6466   | PASS | 0.145833333 |
|         |             |      | 0.230769231 |
| 32/684  | 669/16292   | PASS | 0.150943396 |
| 25/684  | 396/16292   | PASS | 0.118644068 |
| 50/694  | 1550/16398  | PASS | 0.107438017 |
| 88/688  | 1996/16302  | PASS | 0.103092784 |
| 191/694 | 4394/16406  | PASS | 0.2625      |
| 109/694 | 3482/16408  | PASS | 0.134615385 |
|         |             |      | 0.1         |
| 141/694 | 2241/16404  | PASS | 0.207920792 |
|         |             |      | 0.111111111 |
|         |             |      | 0.179487179 |
| 14/692  | 363/16406   | PASS | 0.112359551 |
| 34/118  | 2236/7506   | PASS | 0.210084034 |
| 264/680 | 4831/15922  | PASS | 0.2         |
| 357/694 | 12596/16402 | PASS | 0.121621622 |
|         |             |      | 0.12        |
| 7/580   | 8/14612     | PASS | 0.11965812  |
| 180/658 | 2403/15912  | PASS | 0.173913043 |
| 232/694 | 6653/16324  | PASS | 0.149606299 |
|         |             |      | 0.166666667 |
| 64/680  | 2400/16378  | PASS | 0.133333333 |
| 62/357  | 368/7760    | PASS | 0.205128205 |
|         |             |      | 0.233333333 |
|         |             |      | 0.133333333 |
|         |             |      | 0.1875      |
| 67/178  | 2543/7876   | PASS | 0.126760563 |
|         |             |      | 0.115384615 |
|         |             |      | 0.4         |
| 206/692 | 5210/16386  | PASS | 0.148148148 |
|         |             |      | 0.117647059 |
|         |             |      | 0.2         |
| 17/616  | 57/11068    | PASS | 0.12371134  |
| 260/694 | 6140/16354  | PASS | 0.142857143 |
| 368/692 | 9517/16400  | PASS | 0.139240506 |
| 2/469   | 88/10040    | PASS | 0.184210526 |
| 139/692 | 3327/16404  | PASS | 0.117647059 |
|         |             |      | 0.133333333 |

VEP annotated somatic variants

|         |             |      |             |
|---------|-------------|------|-------------|
| 337/464 | 5789/10021  | PASS | 0.166666667 |
| 215/684 | 7155/16348  | PASS | 0.192982456 |
| 127/596 | 1264/10224  | PASS | 0.227272727 |
|         |             |      | 0.176470588 |
| 305/682 | 7806/16396  | PASS | 0.124087591 |
|         |             |      | 0.285714286 |
|         |             |      | 0.136363636 |
|         |             |      | 0.176470588 |
| 4/670   | 72/14540    | PASS | 0.14893617  |
| 204/694 | 4245/16404  | PASS | 0.151111111 |
|         |             |      | 0.1875      |
| 1/622   | 10/11254    | PASS | 0.238095238 |
|         |             |      | 0.131578947 |
|         |             |      | 0.15        |
| 326/672 | 7687/16242  | PASS | 0.229508197 |
|         |             |      | 0.212121212 |
|         |             |      | 0.1875      |
| 50/694  | 1222/16392  | PASS | 0.137096774 |
|         |             |      | 0.210526316 |
|         |             |      | 0.163265306 |
| 93/694  | 3829/16408  | PASS | 0.12371134  |
| 7/380   | 380/11236   | PASS | 0.103773585 |
|         |             |      | 0.2         |
| 14/694  | 197/16396   | PASS | 0.147058824 |
|         |             |      | 0.104166667 |
| 311/694 | 10842/16334 | PASS | 0.160714286 |
| 134/684 | 1881/15584  | PASS | 0.105263158 |
| 147/368 | 5401/8097   | PASS | 0.14516129  |
|         |             |      | 0.166666667 |
| 2/686   | 18/16252    | PASS | 0.181818182 |
| 181/694 | 3956/16302  | PASS | 0.14        |
| 466/688 | 10718/16214 | PASS | 0.222222222 |
| 268/694 | 6421/16408  | PASS | 0.14        |
| 207/690 | 4440/16404  | PASS | 0.26        |
| 172/576 | 3690/8894   | PASS | 0.171428571 |
| 201/694 | 6566/16342  | PASS | 0.125       |
| 212/694 | 7182/16408  | PASS | 0.168831169 |
| 222/694 | 7425/16406  | PASS | 0.142857143 |
| 119/680 | 3334/15572  | PASS | 0.112676056 |
| 176/694 | 3977/16386  | PASS | 0.210526316 |
|         |             |      | 0.222222222 |
|         |             |      | 0.1875      |
| 436/694 | 10074/16406 | PASS | 0.12962963  |
|         |             |      | 0.166666667 |
|         |             |      | 0.107142857 |
|         |             |      | 0.119402985 |
| 187/614 | 4533/15552  | PASS | 0.1         |
| 44/694  | 531/16408   | PASS | 0.1625      |
|         |             |      | 0.461538462 |
|         |             |      | 0.173913043 |
| 167/620 | 4318/14802  | PASS | 0.136363636 |
|         |             |      | 0.129032258 |
| 11/632  | 107/14502   | PASS | 0.102564103 |
| 9/680   | 32/15560    | PASS | 0.1875      |
| 524/692 | 12986/16388 | PASS | 0.161764706 |

VEP annotated somatic variants

|         |             |      |             |
|---------|-------------|------|-------------|
| 185/526 | 4818/12656  | PASS | 0.102941176 |
| 0/94    | 3/5882      | PASS | 0.137931034 |
| 3/404   | 1/11848     | PASS | 0.127272727 |
| 97/438  | 2278/8918   | PASS | 0.157894737 |
|         |             |      | 0.135135135 |
|         |             |      | 0.225806452 |
|         |             |      | 0.126126126 |
| 41/288  | 267/9454    | PASS | 0.133333333 |
| 234/540 | 5776/13948  | PASS | 0.12        |
|         |             |      | 0.125       |
| 85/694  | 1676/16406  | PASS | 0.137254902 |
| 71/488  | 1452/13034  | PASS | 0.166666667 |
|         |             |      | 0.15        |
|         |             |      | 0.193548387 |
| 45/249  | 251/5380    | PASS | 0.184210526 |
|         |             |      | 0.133333333 |
| 101/684 | 4540/16132  | PASS | 0.146428571 |
| 159/622 | 3142/12780  | PASS | 0.235294118 |
| 71/194  | 3000/8082   | PASS | 0.140186916 |
|         |             |      | 0.214285714 |
|         |             |      | 0.230769231 |
| 1/178   | 2/7890      | PASS | 0.111111111 |
| 48/122  | 2000/5574   | PASS | 0.318181818 |
| 0/0     | 88/164      | PASS | 0.129032258 |
|         |             |      | 0.115384615 |
| 100/170 | 4474/7652   | PASS | 0.109489051 |
| 284/692 | 6351/16382  | PASS | 0.102941176 |
| 208/622 | 4089/14968  | PASS | 0.170212766 |
| 17/146  | 283/7880    | PASS | 0.125       |
|         |             |      | 0.109589041 |
|         |             |      | 0.127272727 |
|         |             |      | 0.14893617  |
| 415/692 | 10715/16388 | PASS | 0.195121951 |
|         |             |      | 0.173913043 |
|         |             |      | 0.272727273 |
| 0/104   | 0/5064      | PASS | 0.189873418 |
|         |             |      | 0.145833333 |
|         |             |      | 0.117647059 |
| 279/692 | 6180/16396  | PASS | 0.123188406 |
| 0/624   | 4/15026     | PASS | 0.25        |
| 114/690 | 2154/16388  | PASS | 0.133333333 |
| 158/682 | 3591/15380  | PASS | 0.116959064 |
| 199/676 | 4352/16242  | PASS | 0.130434783 |
|         |             |      | 0.142857143 |
| 540/690 | 13524/16400 | PASS | 0.139240506 |
|         |             |      | 0.333333333 |
| 261/690 | 5890/16406  | PASS | 0.137931034 |
| 473/688 | 11067/16144 | PASS | 0.109756098 |
|         |             |      | 0.157894737 |
| 0/108   | 2/3330      | PASS | 0.172413793 |
|         |             |      | 0.129032258 |
| 6/694   | 247/16408   | PASS | 0.186666667 |
|         |             |      | 0.3         |
| 17/694  | 229/16408   | PASS | 0.119047619 |
| 459/694 | 11468/16406 | PASS | 0.101265823 |



VEP annotated somatic variants

|         |             |                        |             |
|---------|-------------|------------------------|-------------|
|         |             |                        | 0.103448276 |
|         |             |                        | 0.181818182 |
|         |             |                        | 0.121621622 |
|         |             |                        | 0.11627907  |
|         |             |                        | 0.152173913 |
|         |             |                        | 0.230769231 |
| 486/694 | 12691/16366 | PASS                   | 0.1         |
|         |             |                        | 0.272727273 |
|         |             |                        | 0.19047619  |
|         |             |                        | 0.5         |
|         |             |                        | 0.125       |
|         |             |                        | 0.127272727 |
| 3/688   | 3/16140     | PASS                   | 0.25        |
| 36/694  | 1473/16406  | PASS                   | 0.220338983 |
|         |             |                        | 0.333333333 |
| 241/694 | 5881/16408  | PASS                   | 0.1625      |
| 428/692 | 9130/16408  | PASS                   | 0.134831461 |
|         |             |                        | 0.103448276 |
|         |             |                        | 0.176470588 |
| 231/694 | 5220/16402  | PASS                   | 0.142857143 |
| 223/666 | 5053/15978  | PASS                   | 0.125       |
| 448/694 | 9685/16382  | PASS                   | 0.120879121 |
| 407/692 | 9292/16380  | PASS                   | 0.101851852 |
| 366/690 | 8350/16366  | PASS                   | 0.146341463 |
| 10/678  | 106/16200   | PASS                   | 0.103448276 |
| 1/678   | 0/16170     | PASS                   | 0.176470588 |
|         |             |                        | 0.205128205 |
|         |             |                        | 0.285714286 |
| 8/148   | 608/4870    | IRTrancheINDEL99.00to9 | 0.103448276 |
|         |             |                        | 0.106382979 |
|         |             |                        | 0.147540984 |
| 77/344  | 2134/12280  | PASS                   | 0.116666667 |
| 315/672 | 5471/16058  | PASS                   | 0.119047619 |
| 144/694 | 3749/16402  | PASS                   | 0.196078431 |
| 113/624 | 3068/12766  | PASS                   | 0.139534884 |
| 123/606 | 2904/14250  | PASS                   | 0.12        |
|         |             |                        | 0.5         |
| 54/694  | 1550/16408  | PASS                   | 0.14953271  |
|         |             |                        | 0.233333333 |
| 0/576   | 23/9022     | PASS                   | 0.14893617  |
|         |             |                        | 0.157894737 |
| 9/682   | 42/16074    | PASS                   | 0.225806452 |
| 253/654 | 6427/15486  | PASS                   | 0.142857143 |
| 123/272 | 4220/10148  | PASS                   | 0.244897959 |
|         |             |                        | 0.155555556 |
|         |             |                        | 0.103448276 |
| 192/678 | 5044/16312  | PASS                   | 0.178571429 |
| 129/300 | 4061/10400  | PASS                   | 0.145299145 |
| 384/694 | 6253/16408  | PASS                   | 0.114503817 |
| 2/184   | 104/7886    | PASS                   | 0.24        |
| 64/162  | 1122/2524   | PASS                   | 0.476190476 |
| 248/428 | 7353/11838  | PASS                   | 0.150684932 |
| 76/244  | 1434/3928   | PASS                   | 0.130434783 |
| 57/620  | 749/11462   | PASS                   | 0.112359551 |
|         |             |                        | 0.238095238 |

VEP annotated somatic variants

|         |             |      |             |
|---------|-------------|------|-------------|
| 9/432   | 130/9440    | PASS | 0.228915663 |
| 0/672   | 0/14694     | PASS | 0.116959064 |
| 367/694 | 9960/16408  | PASS | 0.158415842 |
|         |             |      | 0.166666667 |
| 51/690  | 310/15924   | PASS | 0.115942029 |
| 30/146  | 995/7612    | PASS | 0.106557377 |
|         |             |      | 0.1         |
|         |             |      | 0.159090909 |
|         |             |      | 0.107142857 |
| 127/692 | 1897/16404  | PASS | 0.209302326 |
| 83/690  | 1681/16370  | PASS | 0.182692308 |
|         |             |      | 0.318181818 |
| 211/363 | 5562/8010   | PASS | 0.184782609 |
| 21/694  | 923/16402   | PASS | 0.104       |
| 65/688  | 2126/16394  | PASS | 0.169117647 |
|         |             |      | 0.157894737 |
| 178/324 | 5202/10964  | PASS | 0.119266055 |
|         |             |      | 0.25        |
| 278/694 | 9843/16396  | PASS | 0.147540984 |
|         |             |      | 0.133333333 |
|         |             |      | 0.135135135 |
| 364/664 | 8409/14594  | PASS | 0.113636364 |
| 68/370  | 2696/9994   | PASS | 0.116666667 |
| 187/692 | 6455/16398  | PASS | 0.108333333 |
| 121/672 | 4304/15858  | PASS | 0.119047619 |
| 245/692 | 8872/16386  | PASS | 0.138297872 |
|         |             |      | 0.139393939 |
| 267/692 | 6777/16398  | PASS | 0.147540984 |
| 385/686 | 10146/15840 | PASS | 0.19379845  |
| 382/694 | 9663/16404  | PASS | 0.128205128 |
| 3/8     | 36/132      | PASS | 0.263157895 |
| 138/468 | 1039/10041  | PASS | 0.14516129  |
| 3/688   | 70/16364    | PASS | 0.15        |
| 288/694 | 6938/16400  | PASS | 0.153846154 |
| 218/684 | 3947/16394  | PASS | 0.188811189 |
| 533/694 | 10411/16396 | PASS | 0.109243697 |
|         |             |      | 0.230769231 |
| 153/626 | 2825/11810  | PASS | 0.145454545 |
| 190/452 | 4565/11478  | PASS | 0.333333333 |
